# Supplementary material for: PLK1 inhibition delays mitotic entry revealing changes to the phosphoproteome of mammalian cells early in division
Source: Springer Nature journal article supplement (doi:10.1038/s44318-025-00400-9), 2025-03-03
Supplement: MOESM1 [file 44318_2025_400_moesm1_esm.pdf › 44318_2025_400_moesm1_esm.pdf]

**Appendix for:**

**PLK1 inhibition delays mitotic entry revealing changes to the phosphoproteome of mammalian cells early in division**

**Table of Contents:**

Page 2: Appendix Figure S1

Page 3: Legend for Appendix Figure S1

Page 4: Appendix Table S1

Page 5: Legend for Appendix Table S1

Appendix Figure S1.

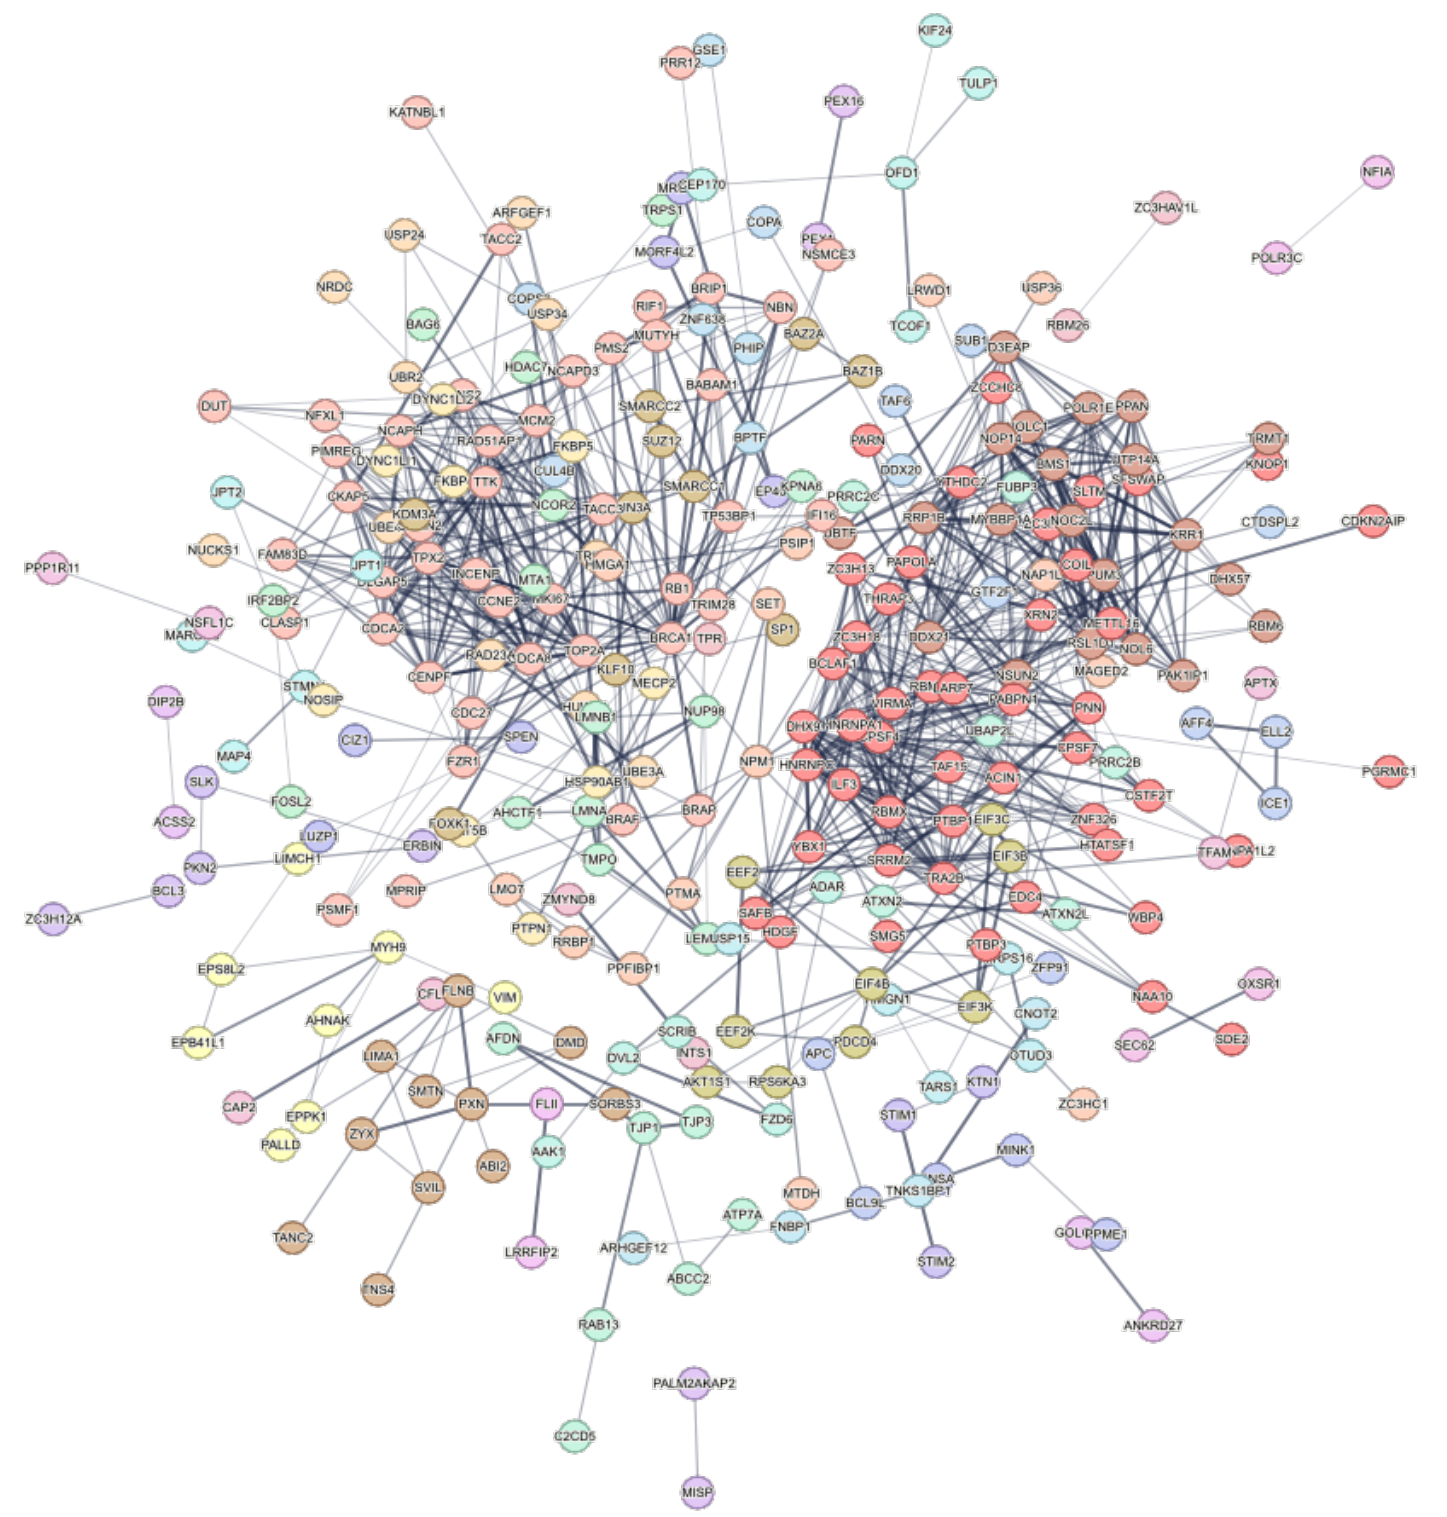

**Appendix Figure S1:**

Network generated by STRING database analysis depicting differentially phosphorylated proteins specific to prolonged prophase after applying linear modeling. The gene names of the corresponding proteins are shown.

Appendix Table S1.

| Gene name   | Protein name                                                    | Position | Sequence window  | Log2 Fold Change | Adjusted p value |
|-------------|-----------------------------------------------------------------|----------|------------------|------------------|------------------|
| BABAM1      | BRISC and BRCA1-A complex member 1                              | 29       | EPRPRTSRNPEGAED  | -0.13564         | 0.452216         |
|             |                                                                 | 65       | ADDGSLNTSGAGPKS  | 3.204965         | 0.016133         |
| BRAF        | Serine/threonine-protein kinase B-raf                           | 429      | PQRERKSSSSSEDRN  | 0.020957         | 0.950661         |
|             |                                                                 | 732      | HRSASEPSLNRAFGQ  | -0.46754         | 0.021532         |
| BRAP        | BRCA1-associated protein                                        | 97       | ERKSSEASPTAQRSK  | 0.758572         | 0.036624         |
|             |                                                                 | 571      | IAMASASSPASSGGS  | 1.233362         | 0.15329          |
| BRCA1       | Breast cancer type 1 susceptibility protein                     | 1524     | LQNRNYPQQEELIKV  | -1.30686         | 0.007531         |
|             |                                                                 | 967      | GNETGLITPNKHGLL  | -0.17774         | 0.826994         |
| BRIP1       | Fanconi anemia group J protein                                  | 1032     | SSENSASSPPRFKTE  | 0.035918         | 0.946208         |
|             |                                                                 | 226      | CSTKQGNSEQSSNTI  | -1.83983         | 0.001085         |
| CCNE2       | G1/S-specific cyclin-E2                                         | 990      | IVISRSTPTFNKQT   | -0.23038         | 0.223636         |
|             |                                                                 | 21       | PQPSQTESPQEAQII  | -2.4767          | 0.000111         |
| CDC27       | Cell division cycle protein 27 homolog                          | 220      | NRLNLESSNKSYSLN  | -1.35576         | 0.004893         |
| CDC42       | Cell division cycle-associated protein 2                        | 710      | EPKAGTDSVPVCASV  | 1.182501         | 0.000399         |
| CDCA8       | Borealin                                                        | 219      | YNISGNGSPPLADSKE | 1.338073         | 0.001152         |
|             |                                                                 | 154      | PSKKRTQSIQKGKGG  | 0.468087         | 0.752849         |
| CENPF       | Centromere protein F                                            | 821      | CRLEADQSPKNSAIL  | 0.501219         | 0.225936         |
|             |                                                                 | 2922     | SVTEKRLSSGQNKAS  | 0.573635         | 0.094435         |
|             |                                                                 | 1121     | MTDNQNNKSKEAGGL  | 3.917572         | 0.001717         |
|             |                                                                 | 3079     | VNNLPERSPPTDSPRE | 2.153058         | 0.000459         |
|             |                                                                 | 3054     | KVKVAQRSPVDSGTI  | 0.114245         | 0.720904         |
| CKAP5       | Cytoskeleton-associated protein 5                               | 144      | VSLNPCNTPQKIFTT  | 0.911767         | 0.011247         |
|             |                                                                 | 816      | FEKMQGQSPAPATRG  | 1.182614         | 0.044594         |
| CLASP1      | CLIP-associating protein 1                                      | 1223     | SRDGGAAAPATEGRG  | 0.340762         | 0.124086         |
|             |                                                                 | 1091     | SSNTSVGSPSNTIGR  | 1.696642         | 0.040077         |
| DLGAP5      | Disks large-associated protein 5                                | 646      | RIRTRRQSSGSATNV  | 0.307958         | 0.44256          |
|             |                                                                 | 656      | SATNVASTPDNRRGS  | 1.075414         | 0.101246         |
|             |                                                                 | 662      | GIPQQTITSPENAGPQ | 2.025834         | 0.000199         |
| DUT         | Deoxyuridine 5'-triphosphate nucleotidohydrolase, mitochondrial | 777      | KNTASQNSILEEGET  | 0.407237         | 0.715857         |
|             |                                                                 | 248      | RGSGGFGSTGKN     | 1.260963         | 0.002084         |
| FAM64A      | Protein FAM64A                                                  | 106      | RIQESQSGTKWLV    | 1.82903          | 0.009454         |
|             |                                                                 | 16       | GTSVRRRLQHQEQL   | 0.592557         | 0.057232         |
| FAM83D      | Protein FAM83D                                                  | 462      | GTQSTEGSPVSKMSV  | 1.241782         | 0.001824         |
| FZR1        | Fizzy-related protein homolog                                   | 70       | RINENEKSPSQNRKA  | 0.825274         | 0.00045          |
| GINS2       | DNA replication complex GINS protein PSF2                       | 182      | QPLESTQSQDF      | -1.61545         | 0.001327         |
|             |                                                                 | 106      | KKEVDATSPAPSTSS  | 0.976518         | 0.002982         |
| IFI16       | Gamma-interferon-inducible protein 16                           | 153      | EEQTQPPSPAGAGMS  | -0.22222         | 0.496304         |
|             |                                                                 | 123      | KTEGAEATPGAQKRK  | -0.25215         | 0.559768         |
|             |                                                                 | 446      | GPREPPQSAARRKSY  | -0.0091          | 0.988528         |
| INCENP      | Inner centromere protein                                        | 263      | KLRIAQVSPGPRDSP  | 0.986793         | 0.150242         |
|             |                                                                 | 421      | NPKPAASSPETPSAG  | 1.649486         | 0.031907         |
|             |                                                                 | 481      | PRSKTPSPSPCASKV  | 0.066519         | 0.826603         |
|             |                                                                 | 135      | SGSSQTESPSSKYSG  | 0.816669         | 0.007063         |
| KATNBL1     | KATNB1-like protein 1                                           | 13       | ESFTMASSPAQRRRG  | -0.20928         | 0.503571         |
| MCM2        | DNA replication licensing factor MCM2                           | 139      | RRLGLYDSDEEDEER  | -0.19919         | 0.461216         |
|             |                                                                 | 27       | GNDPLTSSPGRSSRR  | -1.03073         | 0.026971         |
| MKI67       | Antigen KI-67                                                   | 584      | VISPPAPSPRKTPVA  | 0.204023         | 0.909901         |
|             |                                                                 | 2783     | PAASVTGSRRRPRAP  | 1.784411         | 0.031297         |
|             |                                                                 | 1253     | TTKIPCDSPQSDPVD  | 1.950414         | 0.00924          |
|             |                                                                 | 1329     | LTENLTGSKRRPQTP  | 0.812784         | 0.592089         |
|             |                                                                 | 1815     | QPGNLPGSNRRLQTR  | -0.13797         | 0.787722         |
|             |                                                                 | 2022     | VGKLTQTSGKTTQTH  | 1.108794         | 0.020309         |
|             |                                                                 | 357      | QYSQQQNSPQKHKNK  | -0.04028         | 0.939795         |
|             |                                                                 | 1376     | TKMPCESSPPESADT  | 1.319096         | 0.005691         |
|             |                                                                 | 374      | YTTGRRESVNLGKSE  | -0.17389         | 0.739664         |
|             |                                                                 | 648      | MICSKRRSGASEANL  | 1.680698         | 0.24483          |
|             |                                                                 | 621      | PKRGGGRKSGNLPSKR | 1.771414         | 0.027648         |
|             |                                                                 | 1628     | DPDKNPASSKRRLKT  | 0.515792         | 0.524267         |
|             |                                                                 | 328      | RDVESVQTPSKAVGA  | 0.014021         | 0.984762         |
|             |                                                                 | 2773     | LKESAKQTPAPAAVS  | 0.50022          | 0.7761           |
|             |                                                                 | 1327     | LDLTENLTGSKRRPQ  | 0.454921         | 0.213038         |
|             |                                                                 | 1503     | SQDPDVPDTPTSKPKQ | 0.396177         | 0.455166         |
| MPRIIP      | Myosin phosphatase Rho-interacting protein                      | 891      | GGGEATGSLAQGKD   | 1.011246         | 0.001912         |
| MUTYH       | A/G-specific adenine DNA glycosylase                            | 512      | SKRSQVSSPCKSRKP  | 0.420998         | 0.023535         |
| NBN         | Nibrin                                                          | 343      | TTPGPSLSQGVSVDE  | -1.53502         | 0.000459         |
| NCAPD3      | Condensin-2 complex subunit D3                                  | 517      | FSYQRQTSNRSEPSG  | -1.86704         | 0.02044          |
|             |                                                                 | 15       | LPATMNNSSSETRGH  | 2.490922         | 0.032082         |
| NCAPH       | Condensin complex subunit 2                                     | 459      | KQDAPSQSENKKKST  | 0.078348         | 0.943523         |
|             |                                                                 | 87       | DSPRLLASPSSRSID  | 0.861254         | 0.38164          |
| NDNL2       | Melanoma-associated antigen G1                                  | 304      | PSGPAAPS         | 1.001316         | 0.008161         |
|             |                                                                 | 64       | SQGSQGPSPPQGARRA | 1.064173         | 0.029366         |
| NFXL1       | NF-X1-type zinc finger protein NFXL1                            | 50       | GAVPSGTSPGCVATT  | 1.595657         | 0.033303         |
| PMS2;PMS2CL | Mismatch repair endonuclease PMS2;Protein PMS2CL                | 403      | MVEKQDQSPSLRTGE  | 1.193663         | 0.00045          |
| PRR12       | Proline-rich protein 12                                         | 917      | AGAYRSPQQTGKAP   | -1.10341         | 0.015456         |
| PSMF1       | Proteasome inhibitor P131 subunit                               | 153      | WEKANVSSPHREFPP  | 1.074455         | 0.003203         |
| RAD51AP1    | RAD51-associated protein 1                                      | 120      | VTTNVQNSQDKSIEK  | -1.65658         | 0.004118         |
|             |                                                                 | 327      | LVVSVKSPNQSLRL   | 0.582974         | 0.183504         |
| RB1         | Retinoblastoma-associated protein                               | 249      | AVIPINGSPTPRRG   | 0.77095          | 0.007063         |
|             |                                                                 | 356      | DSFETQRTPRKSNLD  | 0.240314         | 0.15906          |
| RIF1        | Telomere-associated protein RIF1                                | 2161     | SLVSANDSPSGMQTR  | 0.736809         | 0.003275         |
|             |                                                                 | 1579     | WKNKSNEVDIQDQE   | 0.03069          | 0.925885         |
|             |                                                                 | 1688     | KRLHKRDSFDNCSLG  | -0.41527         | 0.187504         |
|             |                                                                 | 2195     | RSQEDEISSPVNKKVR | 0.319566         | 0.418184         |
| SLAIN2      | SLAIN motif-containing protein 2                                | 2196     | SQEDEISSPVNKVRR  | 0.215008         | 0.539879         |
|             |                                                                 | 63       | IPSSGAASPRGFPLG  | 1.578614         | 0.000635         |
| TACC2       | Transforming acidic coiled-coil-containing protein 2            | 48       | AGSLGPGSPVRAGAS  | 0.000119         | 0.999812         |
|             |                                                                 | 1635     | PRSTCAPSPQREVLT  | 1.402082         | 0.008431         |
| TACC3       | Transforming acidic coiled-coil-containing protein 3            | 2256     | DSSGQEDSPAKGLSV  | 0.519993         | 0.036132         |
|             |                                                                 | 2226     | GGGRVQNSPPVGRKT  | -0.17854         | 0.215832         |
| TOP2A       | DNA topoisomerase 2-alpha                                       | 317      | AGRAMTILSPQEEVAA | 0.369546         | 0.423235         |
|             |                                                                 | 434      | SEAQPPESPETRLGQ  | 0.822245         | 0.001201         |
| TP53BP1     | Tumor suppressor p53-binding protein 1                          | 1106     | DEEENEESDNEKETE  | -0.05939         | 0.862834         |
|             |                                                                 | 1247     | KNENTEGSPQEDGVE  | 0.102269         | 0.858992         |
|             |                                                                 | 4        | MEVSPLOQPVNE     | 0.940392         | 0.003275         |
|             |                                                                 | 1213     | QMAEVLPSPRGQRVI  | 1.924142         | 7.36E-05         |
| TPX2        | Targeting protein for Xklp2                                     | 862      | TQEKTSNLTEDSKM   | 1.845217         | 0.104161         |
|             |                                                                 | 552      | IEDTEPMSPVLSNKF  | -2.26502         | 0.003153         |
|             |                                                                 | 1028     | AVAESVASPQKTMVS  | -0.50497         | 0.007574         |
|             |                                                                 | 831      | EPVEQDSSQPSLPLV  | -0.28053         | 0.416727         |
| TRIM28      | Transcription intermediary factor 1-beta                        | 380      | TPFIVPSSPTEQEGR  | -0.57136         | 0.008651         |
|             |                                                                 | 186      | TAEKNASSPEKAKGR  | 0.140839         | 0.41381          |
| TTK         | Dual specificity protein kinase TTK                             | 738      | QPLTVVPVSFKFSTRF | 1.107704         | 0.000479         |
|             |                                                                 | 369      | KICRDPQTPTVLQTKH | 0.074426         | 0.84967          |
|             |                                                                 | 19       | AASAASGSPGPGEGS  | -0.29259         | 0.514772         |
|             |                                                                 | 697      | TGVVAKLSPANQRKC  | 0.771591         | 0.088797         |
|             |                                                                 | 473      | SGVKRSRSGEGEVSG  | -0.38443         | 0.018897         |
|             |                                                                 | 436      | VFSVSKQSPPISTSK  | 0.464797         | 0.018196         |

**Appendix Table S1:**

Table showing all proteins depicted in Fig. 6A, with the corresponding gene names, position of phosphosites detected, sequence window around the phosphosites and the results of enrichment in prolonged prophase after applying linear modeling for analysis.
