# Supplementary material for: PLK1 inhibition delays mitotic entry revealing changes to the phosphoproteome of mammalian cells early in division
Source: Springer Nature journal article supplement (doi:10.1038/s44318-025-00400-9), 2025-03-03
Supplement: MOESM2 [file 44318_2025_400_moesm2_esm.pdf › 44318_2025_400_moesm2_esm.pdf]

**Table EV1:** Parameter values for the model of Rata et al. 2018, used for the simulations shown in Figure 1, 2 and EV2. Compared to the original work we rescaled all kinetic parameters, except those indicated in bold, by a factor of 0.025 to account for the duration of G2-phase of several hours (right column). The total cdk2-cyclin A concentration is varied to model the differences between cells.

| Name             | Name in code    | Description                                                       | Value                                      | Ratio to parameters in Rata et al. (2018) |
|------------------|-----------------|-------------------------------------------------------------------|--------------------------------------------|-------------------------------------------|
| $k_{aPP1}$       | kapp1           | Constitutive dephosphorylation and thereby activation of PP1      | $0.01725 \text{ h}^{-1}$                   | 0.025                                     |
| $k_{aPP1a}$      | kapp1a          | Dephosphorylation of PP1 by dephosphorylated PP1 in trans         | $1.0581 \text{ h}^{-1}$                    | 0.025                                     |
| $k_{iPP1}$       | kipp1           | Constitutive phosphorylation and hence inactivation of PP1        | $0.0027 \text{ h}^{-1}$                    | 0.025                                     |
| $k_{Cdk1,PP1}$   | kipp1C          | Phosphorylation of PP1 by Cdk1                                    | $1.1323 \text{ h}^{-1}$                    | 0.025                                     |
| $k_{PP1,Gwl}$    | kPP1Gw          | Dephosphorylation of Gwl by PP1                                   | $27.7086 \text{ h}^{-1}$                   | 0.025                                     |
| $k_{ass}$        | kass            | Association of pENSA with PP2A:B55                                | $925.9211 \text{ h}^{-1}$                  | 0.025                                     |
| $k_{dis}$        | kdis            | Dissociation of the pENSA:PP2A:B55 complex                        | $0.0132 \text{ h}^{-1}$                    | 0.025                                     |
| $k_{catB55}$     | kcatB55         | Dephosphorylation of pENSA when in complex with PP2A:B55          | $1.5507 \text{ h}^{-1}$                    | 0.025                                     |
| $k_{Gwl,ENSA}$   | kGwENSA         | Phosphorylation of ENSA by Gwl                                    | $31.3216 \text{ h}^{-1}$                   | 0.025                                     |
| $k_{PPX,Gwl}$    | kppxGwl         | Basal dephosphorylation of Gwl                                    | $0.234 \text{ h}^{-1}$                     | 0.025                                     |
| $k_{Cdk1,Sub}$   | <b>kcBc1Sub</b> | <b>Phosphorylation of the substrate by Cdk1</b>                   | <b><math>0.12 \text{ h}^{-1}</math></b>    | <b>0.250</b>                              |
| $k_{B55,Sub}$    | <b>kB55Sub</b>  | <b>Dephosphorylation of the substrate by PP2A:B55</b>             | <b><math>0.8895 \text{ h}^{-1}</math></b>  | <b>0.250</b>                              |
| $k_{Cdk1,Gwl}$   | kcBc1G          | Phosphorylation of Gwl by Cdk1                                    | $0.35895 \text{ h}^{-1}$                   | 0.025                                     |
| $k_{B55,Gwl}$    | kB55G           | Dephosphorylation of Gwl by PP2A:B55                              | $744.8454 \text{ h}^{-1}$                  | 0.025                                     |
| $k_{Cdk2,Gwl}$   | kcAc2G          | Phosphorylation of Gwl by Cdk2                                    | $0.2874 \text{ h}^{-1}$                    | 0.025                                     |
| $k_{Cdc25S}$     | k25S            | Dephosphorylation of Y15 of Cdk1 by unphosphorylated Cdc25        | $0.0075 \text{ h}^{-1}$                    | 0.025                                     |
| $k_{Cdc25F}$     | k25F            | Dephosphorylation of Y15 of Cdk1 by phosphorylated Cdc25          | $1.4117 \text{ h}^{-1}$                    | 0.025                                     |
| $k_{Wee1S}$      | kweeS           | Phosphorylation of Y15 of Cdk1 by phosphorylated Wee1             | $0.0075 \text{ h}^{-1}$                    | 0.025                                     |
| $k_{Wee1F}$      | kweeF           | Phosphorylation of Y15 of Cdk1 by unphosphorylated Wee1           | $70.9406 \text{ h}^{-1}$                   | 0.025                                     |
| $k_{Cdk1,Wee1}$  | kcBc1W1         | Phosphorylation of Wee1 by Cdk1                                   | $1.9698 \text{ h}^{-1}$                    | 0.025                                     |
| $k_{Cdk1,Cdc25}$ | <b>kcBc125</b>  | <b>Phosphorylation of Cdc25 by Cdk1</b>                           | <b><math>0.19698 \text{ h}^{-1}</math></b> | <b>0.0025</b>                             |
| $k_{PPX,Y15}$    | kppxY15         | Dephosphorylation of Wee1 and Cdc25 by a constitutive phosphatase | $0.0075 \text{ h}^{-1}$                    | 0.025                                     |
| $k_{Cdk2,Wee1}$  | kcAc2W1         | Phosphorylation of Wee1 by Cdk2                                   | $0.1644 \text{ h}^{-1}$                    | 0.025                                     |
| $k_{Plk1,Cdc25}$ | <b>kplk1225</b> | <b>Phosphorylation of Cdc25 by Plk1</b>                           | <b><math>0.01644 \text{ h}^{-1}</math></b> | <b>0.0025</b>                             |
| $k_{B55,Wee1}$   | kB55W1          | Dephosphorylation of Wee1 by PP2A:B55                             | $0.82665 \text{ h}^{-1}$                   | 0.025                                     |
| $k_{N55,Cdc25}$  | kB5525          | Dephosphorylation of Cdc25 by PP2A:B55                            | $0.82665 \text{ h}^{-1}$                   | 0.025                                     |
| $f_{Plk1}$       | fplk1           | Fraction active Plk1                                              | 0 - 1                                      | NA                                        |
| $CycBCdk1_{Tot}$ | CycBCdk1T       | Total Cdk1 Cyclin B complexes                                     | 8.1808 a.u.                                | 1                                         |
| $CycACdk2_{Tot}$ | CycACdk2T       | Total Cdk2 Cyclin A complexes                                     | 2 - 5 a.u.                                 | 2-5                                       |
| $PP1_{Tot}$      | PP1T            | Total PP1                                                         | 1 a.u.                                     | 1                                         |
| $Gwl_{Tot}$      | Gwtot           | Total Gwl                                                         | 1 a.u.                                     | 1                                         |
| $ENSA_{Tot}$     | ENSAtot         | Total Ensa                                                        | 1 a.u.                                     | 1                                         |
| $B55_{Tot}$      | B55tot          | Total B55                                                         | 0.25 a.u.                                  | 1                                         |
| $Sub_{Tot}$      | SubT            | Total Cdk1 phosphorylation substrate                              | 1 a.u.                                     | 1                                         |
