# Supplementary material for: PLK1 inhibition delays mitotic entry revealing changes to the phosphoproteome of mammalian cells early in division
Source: Springer Nature journal article supplement (doi:10.1038/s44318-025-00400-9), 2025-03-03
Supplement: MOESM12 [file 44318_2025_400_MOESM12_ESM.pdf]

## Expanded View Figures

**Figure EV1. Detailed characterization of the delayed mitotic entry in plk1-inhibited cells.**

(A) HeLa cells expressing PCNA-mEGFP revealing S-phase progression after thymidine release. (B) Quantification of the S-phase duration in DMSO ( $n = 20$ ) and BI 2536-treated ( $n = 17$ ) cells. Unpaired Student's  $t$  test with Welch's correction was used for statistical significance assessment. n.s. corresponds to  $p > 0.05$  ( $p = 0.4028$ ). (C) Quantification of the duration from S-phase termination to NEBD and with and without thymidine synchronization in HeLa Kyoto cells measured by PCNA labeling. Unpaired Student's  $t$  test with Welch's correction between DMSO ( $n = 15$ ) and BI2536-treated ( $n = 15$ ) with added thymidine, and DMSO ( $n = 30$ ) and BI 2536-treated ( $n = 17$ ) without adding thymidine was used for statistical significance assessment. \*\*\*\* corresponds to  $p < 0.0001$ , with added thymidine  $p = 7.98E-05$  and without added thymidine  $p = 1.35E-08$ . (D) Immunofluorescence images of HeLa Kyoto cells stained for  $\gamma$ -H2AX antibodies. Example images (left) and quantification of the number of  $\gamma$ -H2AX foci per nuclei (right) are shown. The DMSO ( $n = 27$ ) and BI2536-treated ( $n = 14$ ) cells were analyzed 8 and 17 h after thymidine release, respectively. Unpaired Student's  $t$  test with Welch's correction was used for statistical significance assessment. n.s. corresponds to  $p > 0.05$  ( $p = 0.5467$ ). (E) Model network modified from Rata et al, 2018 to include a plk1 dependent term. (F) Immunoblot analysis of samples collected at different time points after thymidine release and DMSO/BI2536 treatment. The cells were split after shaking off into supernatant (mitotic) and attached (interphasic) fractions. The blots were imaged after treatment with fluorescently-labeled secondary antibodies specific to the primary antibodies shown. Cdk1 was used as a loading control. For (B), (C), and (D): significance testing was done using unpaired Student's  $t$ -test with Welch's correction. For (A) and (D): scale bars are 10  $\mu$ m. (G) Bifurcation graph of the mathematical model. Shown is the steady state active [cdk1-cyclin B] ([CycBCdk1]) as function of [cdk2-cyclin A] activity ([CycACdk2<sub>Tot</sub>]). Stable and unstable steady states are indicated by a solid and dashed line, respectively. When cdk2-cyclin A activity is above the saddle node (SN) bifurcation only the high cdk1 activity steady state remains.

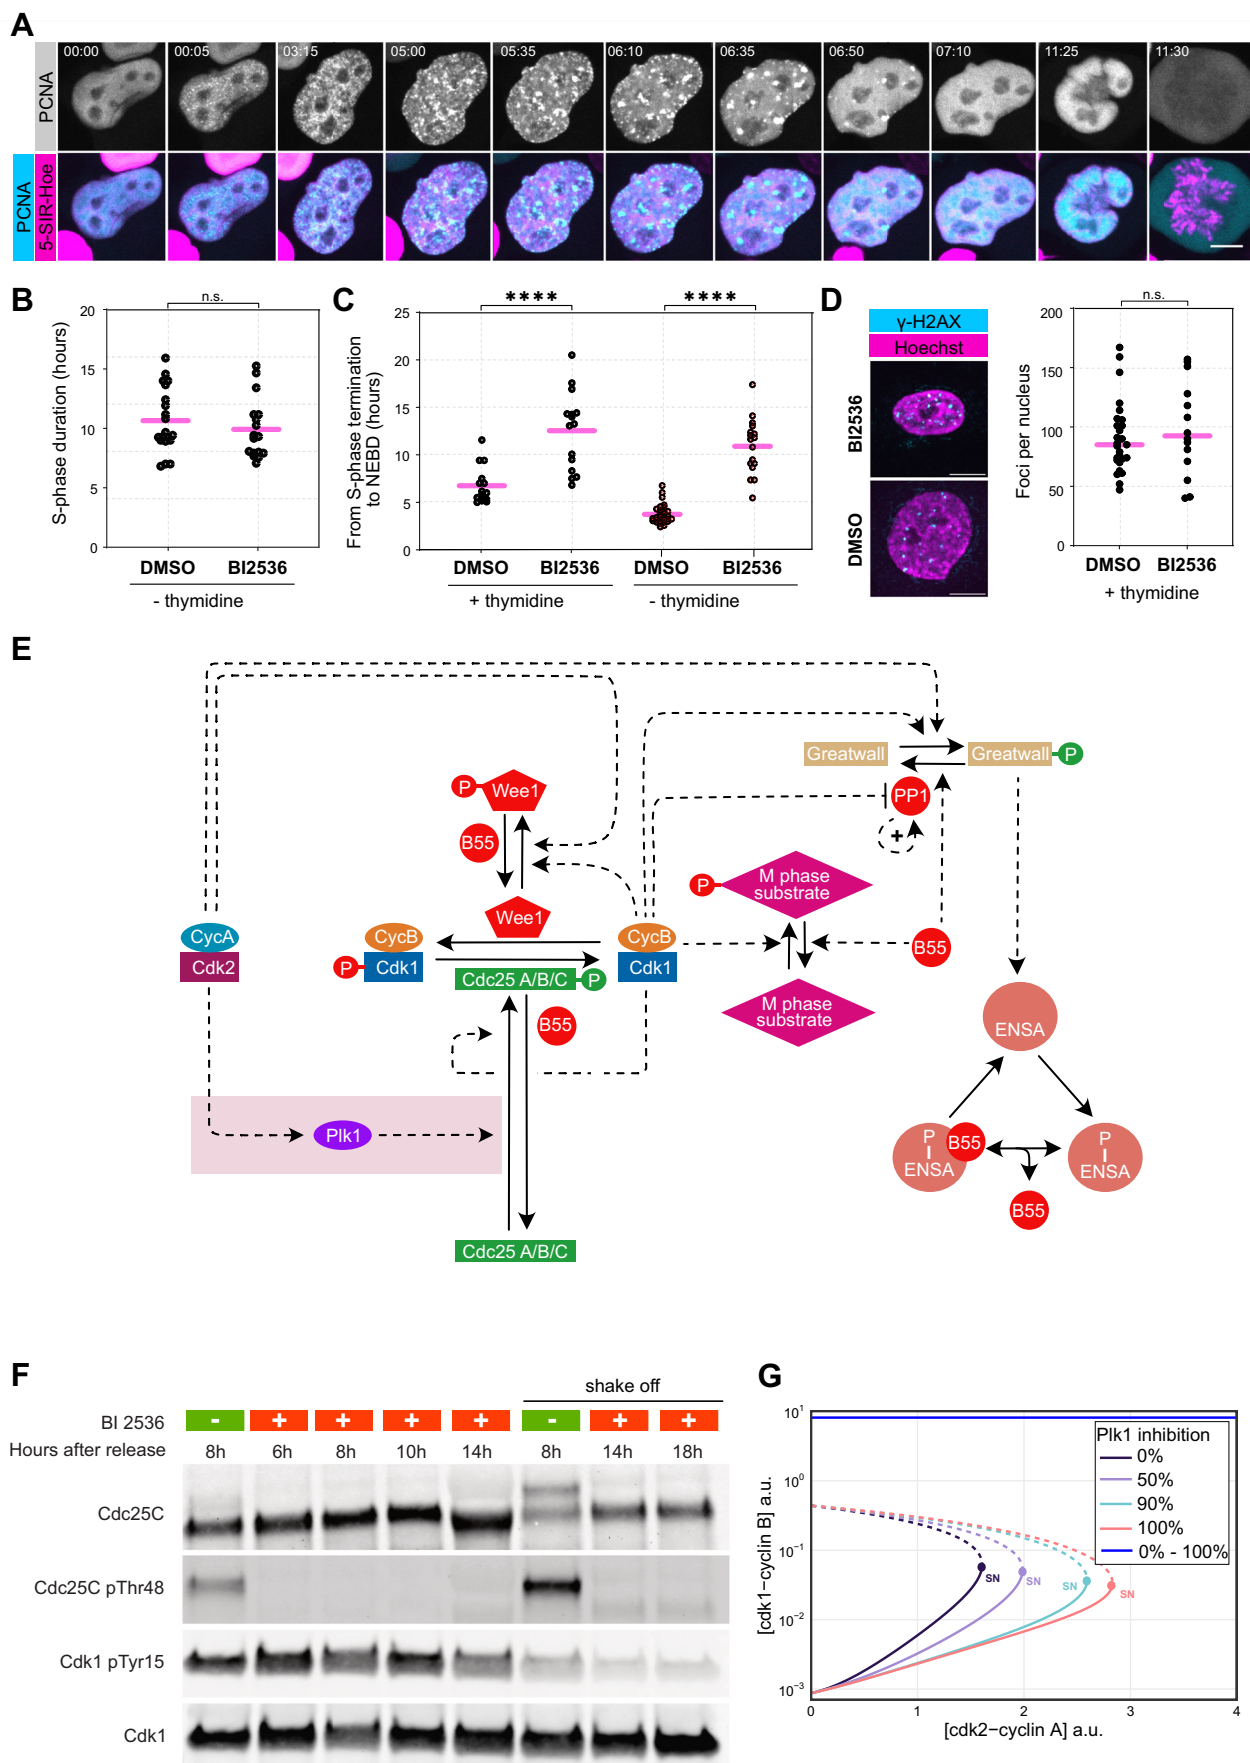

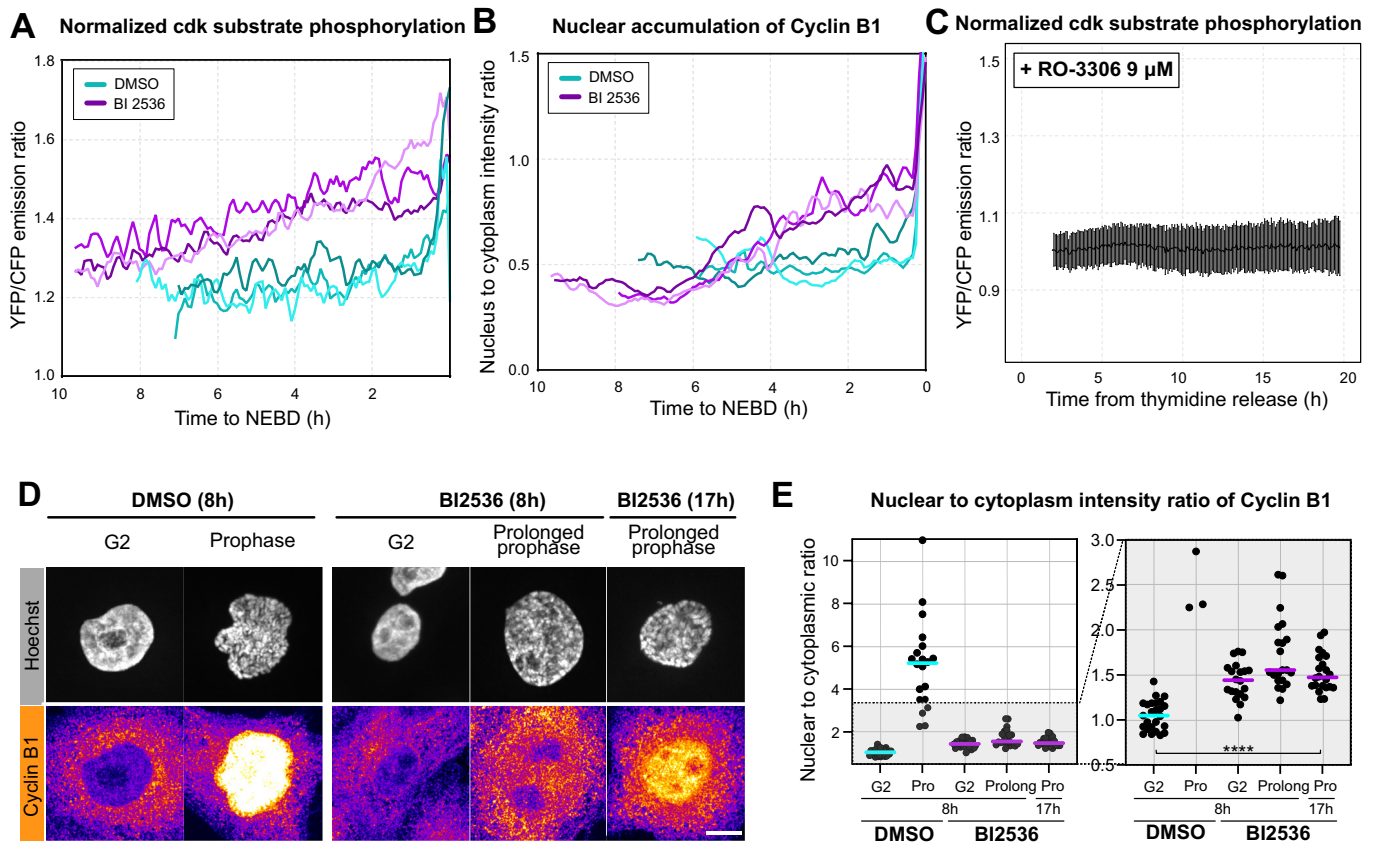

**Figure EV2. Cdk1 activity and Cyclin B1 localization quantified in individual live cells and in fixed cells.**

(A) Quantification of FRET ratio changes of the Eevee-spCDK FRET probe in individual control and BI 2536-treated cells. (B) Quantification of Cyclin B1 nucleus to cytoplasm intensity ratio in individual control and BI 2536-treated cells. (C) Quantification of FRET ratio changes of the Eevee-spCDK FRET probe in RO 3306-treated population of cells ( $n = 59$ ). Mean  $\pm$  Standard Deviation (SD) is shown. (D) Immunofluorescence of cyclin B1 in control and BI 2536-treated cells fixed at different time points after thymidine release. Scale bar is 10  $\mu$ m. (E) Quantification of nuclear to cytoplasmic ratio of fluorescence intensity of cyclin B1 in control (G2 ( $n = 25$ ) and prophase ( $n = 20$ )), and treated cells (G2 ( $n = 20$ ), prolonged prophase ( $n = 22$ ) 8 h after thymidine release and prolonged prophase ( $n = 22$ ) 17 h after thymidine release) on images similar to (D). Inset magnifying the lower range is shown on the right panel. Unpaired Student's  $t$  test with Welch's correction was used for statistical significance assessment with \*\*\*\* corresponding to  $p < 0.0001$  ( $p = 2.22 \times 10^{-4}$ ). Source data are available online for this figure.

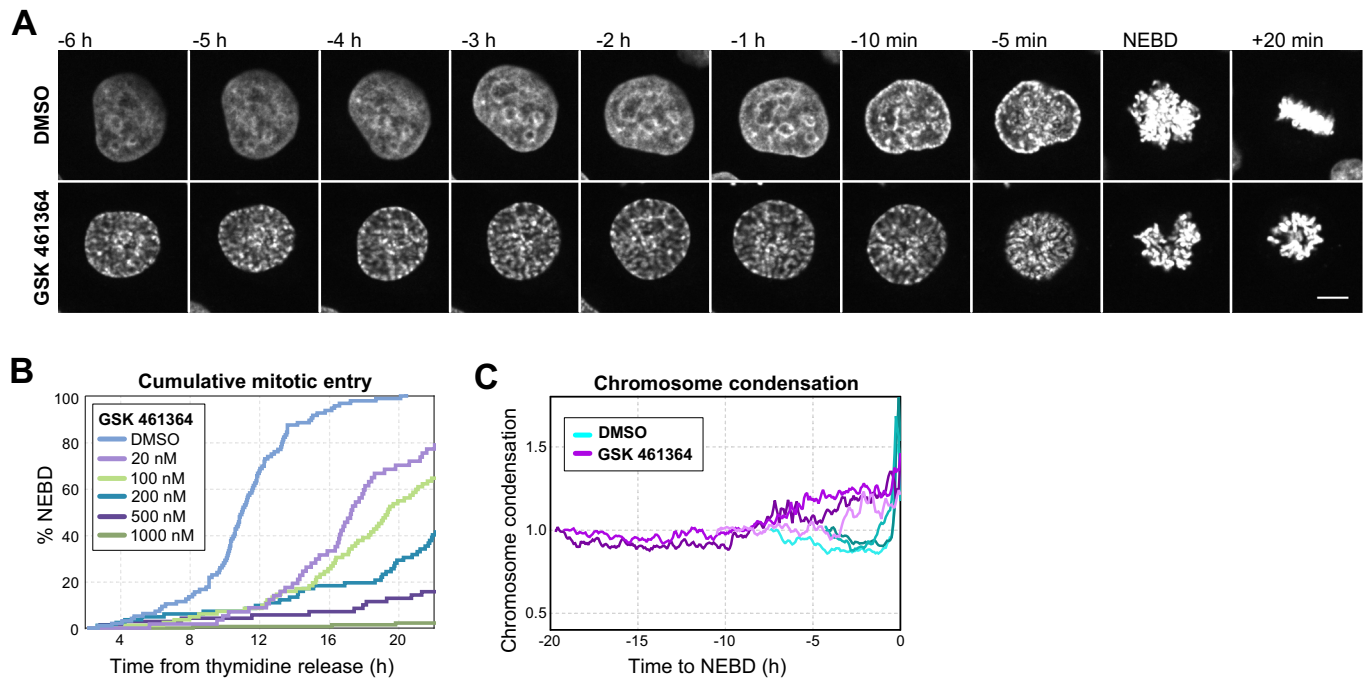

**Figure EV3. A structurally unrelated Plk1 inhibitor recapitulates the phenotype caused by BI 2536.**

(A) Montages of HeLa cells showing mitotic entry of exemplary control and GSK 461364-treated cells stained with 5-SiR-Hoechst. Time is relative to NEBD. Scale bar is 10  $\mu$ m. (B) Cumulative plots of NEBD timing in response to increasing concentrations of GSK 461364 in HeLa Kyoto cells. (C) Quantification of chromosome condensation by standard deviation of fluorescence intensity of individual HeLa Kyoto cells on recording similar to shown in (A).

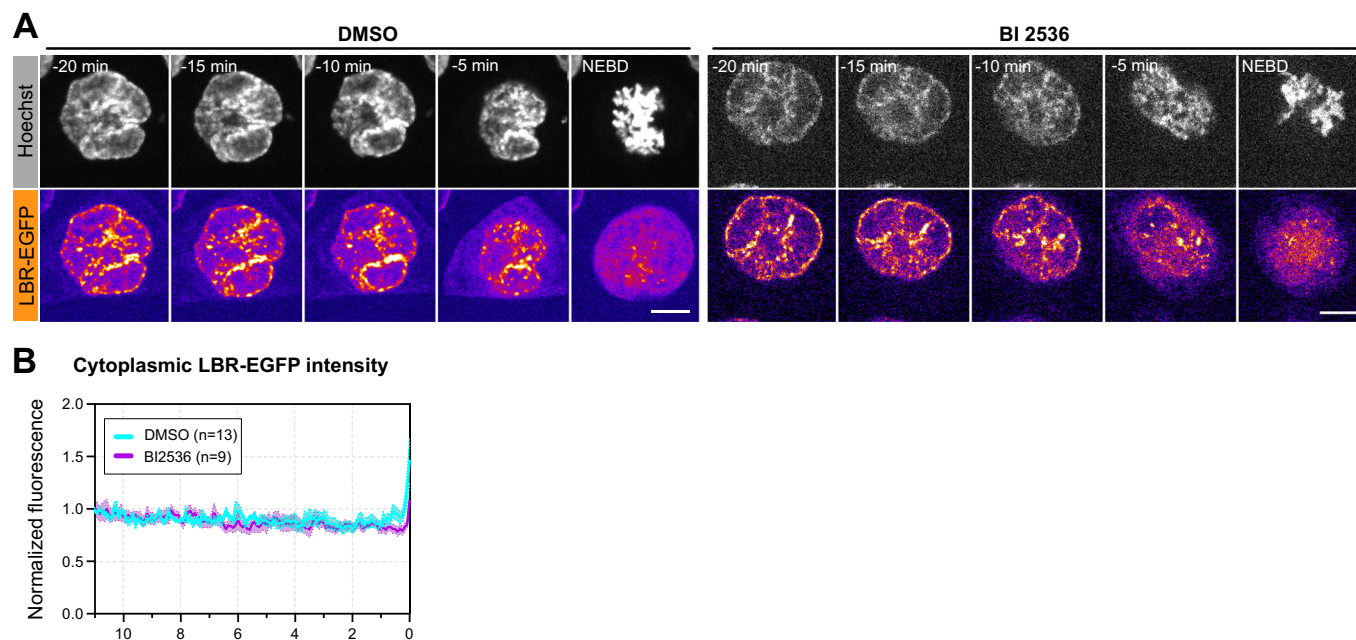

**Figure EV4. Release kinetics of LBR, a protein of the nuclear envelope, is unaffected by Plk1 inhibition.**

(A) Selected frames from a time lapse showing the localization of LBR-EGFP in the time leading to NEBD in DMSO and BI 2536-treated cells. Scale bar is 10  $\mu$ m. (B) Quantification of LBR-EGFP mean cytoplasmic fluorescence intensity in DMSO and BI 2536-treated cells on recordings similar to (A). Data are normalized to the mean intensity in the first 5 frames of imaging. Mean  $\pm$  standard error of mean (SEM) is shown.

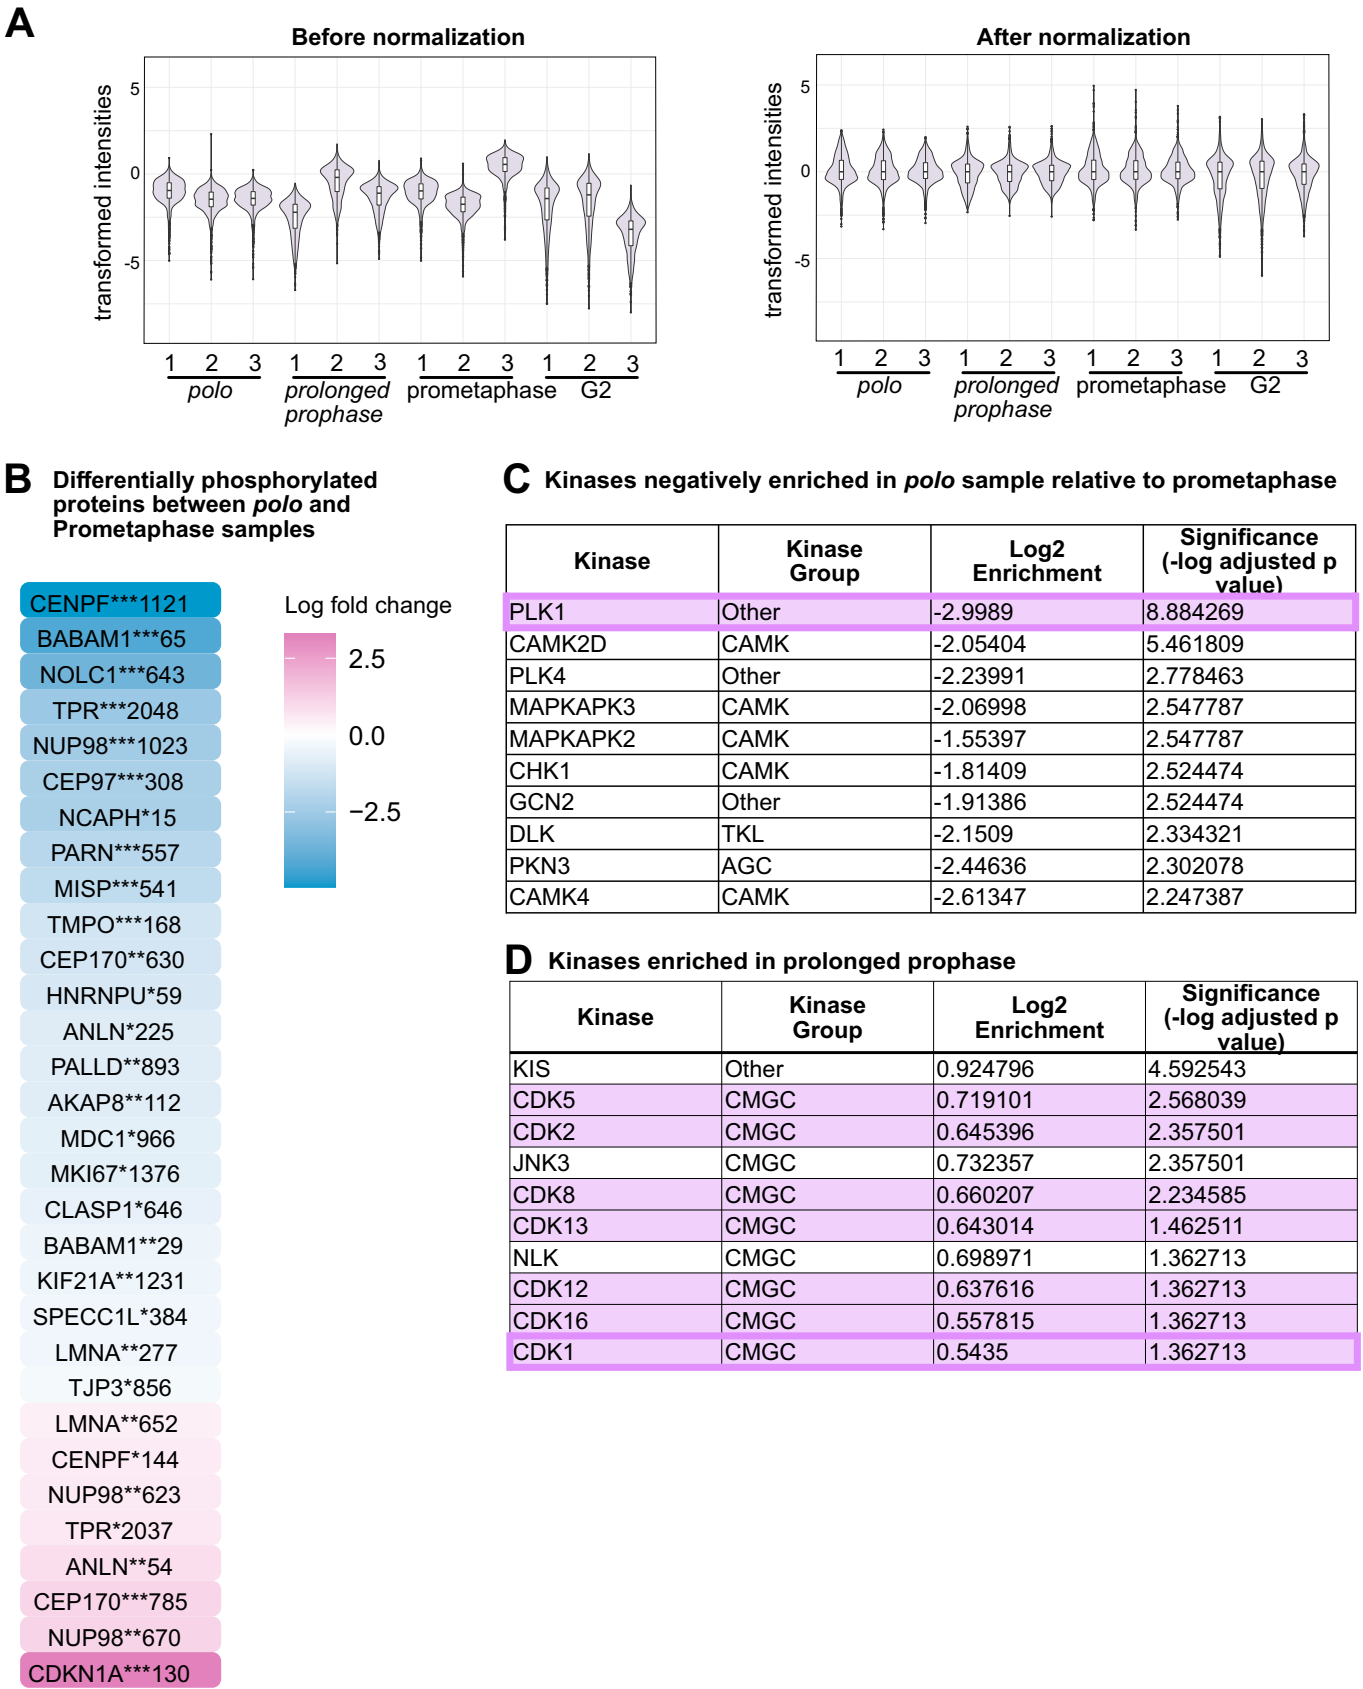

◀ **Figure EV5. Kinase profiling confirms specific inhibition of plk1 by BI 2536, and cdks as the primary kinases active in the prolonged prophase state.**

(A) Violin plots showing the distribution of the log(2) transformed intensities of the phosphosites detected in the 12 samples (4 samples in 3 replicates) before and after normalization. For the shown box plots, the center corresponds to the median and the lower and upper hinges correspond to the first and third quartiles (the 25th and 75th percentiles). The upper and lower whisker extend from the hinge to the largest and smallest value, respectively, no further than  $1.5 \times \text{IQR}$  from the hinge (where IQR is the inter-quartile range, or distance between the first and third quartiles). Data beyond the end of the whiskers are outliers and are plotted individually. (B) Differentially phosphorylated peptides in *polo* cells in comparison to prometaphase cells that were detected using linear modeling. The gene names of the corresponding peptides are shown, the asterisks mark the adjusted *p*-value with \*\*\*, \*\*, \* corresponding to  $p \leq 0.001$ , 0.01, and 0.05, respectively, followed by the position of the phosphosite within the amino acid sequence of the protein. The color coding corresponds to the log(2) fold change of intensity values. Statistical significance was assessed using a moderated *t*-test where empirical Bayes moderation was applied to stabilize variance estimates across genes. (C) List of kinases least enriched in the *polo* sample in comparison to the prometaphase sample after applying linear modeling. (D) List of kinases most enriched in the prolonged prophase sample after applying linear modeling. For (C) and (D), the enrichments were determined using one-sided exact Fisher's tests and corrected for multiple hypotheses using the Benjamini-Hochberg method.
