# Supplementary material for: PLK1 inhibition delays mitotic entry revealing changes to the phosphoproteome of mammalian cells early in division
Source: EMBO J. 2025 Mar 3;44(7):1891–920. doi: 10.1038/s44318-025-00400-9 (PMC11962124; doi:10.1038/s44318-025-00400-9)
Supplement: Supplementary file 5 — Dataset EV2 [file 44318_2025_400_MOESM5_ESM.xlsx]

## Sheet: Intensities normalized
polo.1	propro.1	prometa.1	G2.1	polo.2	propro.2	prometa.2	G2.2	polo.3	propro.3	prometa.3	G2.3	Localization.prob	Protein	Protein.names	Gene.names	Sequence.window	Position
0.243425	-0.112668	0.123923	-1.01019	0.125823	-0.0673751	0.0659105	-0.710124	0.244518	-0.0275024	0.0310555	-0.289843	1	A0A2R8YFR7	Rho guanine nucleotide exchange factor 5	ARHGEF5	LRRTTPQQGASGPGRSPVGQARQPEKPSHLH	983
0.718225	-0.552348	0.563602	-0.717964	0.655499	-0.662649	0.733539	-0.820262	0.221818	-0.412107	-0.00786529	0.00786529	1	A6ND36	Protein FAM83G	FAM83G	QAKGGQVPRLLPDPGSPRLAQNARPMTDGRA	760
0.03487	0.146404	-0.0452885	-0.141675	-0.00497515	0.0115461	0.0130611	-0.109705	0.060153	-0.0579413	-0.0908203	0.247491	0.999618	A7E2V4	Zinc finger SWIM domain-containing protein 8	ZSWIM8	CQNWRGWRKQSAGPNSPTGGGGGGGSGGTRM	53
-0.138348	0.136574	-0.214768	1.24927	-0.817194	0.286555	-0.28802	0.424709	-0.275308	0.315953	-0.493134	0.273967	0.994305	G9CGD6	Connector enhancer of kinase suppressor of ras 3	CNKSR3	SSKCKQPLPGPKGSESPNSFLDQESRRRRFT	383
1.68465	-1.66407	1.67532	-3.75413	1.67287	-1.54574	1.54428	-3.54519	1.28072	-1.19058	1.19413	-1.87264	0.931774	O00151	PDZ and LIM domain protein 1	PDLIM1	HIGSAHNRSAMPFTASPASSTTARVITNQYN	130
-1.14557	1.14379	-1.28769	1.26932	-1.50033	1.18104	-1.1825	1.26314	-1.47698	1.11364	-1.11009	1.15321	0.924883	O00178	GTP-binding protein 1	GTPBP1	MDSPVPASMFAPEPSSPGAARAAAAAARLHG	25
-0.33226	0.330486	-0.383068	0.552393	-0.407258	0.400108	-0.669881	0.633398	-0.363542	0.365754	-0.455793	0.931214	0.982383	O00193	Small acidic protein	SMAP	SAARESHPHGVKRSASPDDDLGSSNWEAADL	17
-0.401118	0.399344	-0.632207	0.494715	-0.327444	0.320294	-0.652444	0.660588	-0.240394	0.242606	-0.459166	0.708846	1	O00264	Membrane-associated progesterone receptor component 1	PGRMC1	HVGKLLKEGEEPTVYSDEEEPKDESARKND_	181
-0.43439	0.432616	-0.478198	0.716222	-0.0287425	0.0215925	-0.384007	0.363144	-0.306266	0.197288	-0.193734	0.496608	1	O00264	Membrane-associated progesterone receptor component 1	PGRMC1	LYKIVRGDQPAASGDSDDDEPPPLPRLKRRD	57
0.0120807	-0.0994698	-0.0224992	0.299697	0.178816	-0.805595	0.24049	-0.176337	0.0133693	-0.0111575	-0.100928	1.7779	0.999994	O00267	Transcription elongation factor SPT5	SUPT5H	PRDVTNFTVGGFAPMSPRISSPMHPSAGGQR	666
0.233143	-0.078618	0.0898721	-0.895286	0.179778	-0.186928	0.30964	-0.576599	-0.0688437	0.0710555	-0.146515	0.269329	1	O00273	DNA fragmentation factor subunit alpha	DFFA	TQSLHSLRSISASKASPPGDLQNPKRARQDP	315
0.109513	0.168537	-0.119931	-0.564156	0.0761433	0.446271	-0.0680573	-0.598581	0.0899888	0.149715	-0.0922582	-1.05688	0.999936	O00294	Tubby-related protein 1	TULP1	KGSGEADKDPSGSPASARKSPAAMFLVGEGS	215
0.377977	-0.379752	1.03045	-0.547022	0.421248	-0.428398	1.43724	-0.532356	0.677433	-0.675221	0.81674	-1.15054	0.999997	O00303	Eukaryotic translation initiation factor 3 subunit F	EIF3F	DTERIGVDLIMKTCFSPNRVIGLSSDLQQVG	258
-0.0630937	0.0613196	0.060288	-0.245272	-0.110944	0.0982765	0.0684748	-0.0603105	0.156674	-0.0757373	0.0182336	-0.0182336	1	O00308	NEDD4-like E3 ubiquitin-protein ligase WWP2	WWP2	HSGASARTTPATGEQSPGARSRHRQPVKNSG	211
0.4081	-0.0420871	0.0533411	-0.807827	0.338715	-0.0712827	0.0698181	-0.794583	0.409514	-0.000696215	0.00424929	-0.945513	1	O00418	Eukaryotic elongation factor 2 kinase	EEF2K	DEDLIFRLEGVDGGQSPRAGHDGDSDGDSDD	18
-0.162155	0.160381	-0.2243	0.150421	-0.132729	0.125579	-0.250676	0.360797	-0.138597	0.140809	-0.235216	0.184057	0.99983	O00425	Insulin-like growth factor 2 mRNA-binding protein 3	IGF2BP3	RGRRGLGQRGSSRQGSPGSVSKQKPCDLPLR	184
-0.858099	0.571496	-0.560242	0.873452	-0.421927	0.693659	-0.537497	0.424406	-0.738177	0.858165	-0.602066	0.602066	0.999452	O00443	Phosphatidylinositol 4-phosphate 3-kinase C2 domain-containing subunit alpha	PIK3C2A	VNGKSLSVATVTRSQSLNIRTTQLAKAQGHI	338
-0.412371	0.410597	-1.23685	0.462357	-0.410188	0.403038	-1.48938	0.566375	-0.407257	0.409469	-1.23552	0.438077	0.891813	O00472	RNA polymerase II elongation factor ELL2	ELL2	EDLKREEEIAKLNNSSPNSSGGVKEDCTASM	503
0.0525206	-0.0542947	-0.0709464	0.291929	0.150445	-0.157595	-0.482832	0.260768	0.0845196	-0.0823079	-0.424554	0.226303	0.998488	O00472	RNA polymerase II elongation factor ELL2	ELL2	KLNPSQNAAGTSRSESPVCSSRDAVSSPQKR	305
0.0165809	-0.104606	0.0505523	-0.0376943	0.936499	-0.438581	0.437117	-0.632965	0.396592	-0.222186	0.225739	-0.356553	0.9654	O00512	B-cell CLL/lymphoma 9 protein	BCL9	SNQGKQGGSASQSQPSPCDSKSGGHTPKALP	62
-1.58748	1.27115	-1.2599	1.70752	-1.12472	0.819369	-0.820833	1.63701	-2.18397	1.88669	-1.88314	2.18021	0.973601	O00512	B-cell CLL/lymphoma 9 protein	BCL9	SNPKVRSSPSGNTQSSPKSKQEVMVRPPTVM	19
0.865576	-0.86735	1.09356	-1.35048	0.432921	-0.440071	0.597162	-0.721775	0.25315	-0.250938	0.51812	-0.72302	0.979254	O00571	ATP-dependent RNA helicase DDX3X	DDX3X	SRFSGGFGARDYRQSSGASSSSFSSSRASSS	606
0.605389	-0.792608	1.29808	-0.626503	0.191863	-0.199013	1.38961	-0.971776	0.335005	-0.636708	0.719872	-0.336346	0.998028	O00571	ATP-dependent RNA helicase DDX3X	DDX3X	FGARDYRQSSGASSSSFSSSRASSSRSGGGG	612
1.53718	-1.41779	1.42905	-1.68576	0.956741	-0.794924	0.793459	-1.61142	0.966879	-0.964667	1.54609	-2.14529	0.997359	O00571	ATP-dependent RNA helicase DDX3X	DDX3X	ARDYRQSSGASSSSFSSSRASSSRSGGGGHG	614
1.78051	-1.69599	1.70724	-3.54432	1.45682	-1.40151	1.40004	-3.02818	0.187207	-0.889105	0.184091	-0.184091	1	O00571	ATP-dependent RNA helicase DDX3X;ATP-dependent RNA helicase DDX3Y	DDX3X;DDX3Y	HYKGSSRGRSKSSRFSGGFGARDYRQSSGAS	594
1.29054	-1.29231	1.44508	-2.14625	0.681114	-0.688264	0.86684	-1.29382	0.938807	-0.936596	1.13746	-1.23306	0.996183	O00571	ATP-dependent RNA helicase DDX3X	DDX3X	RSDSRGKSSFFSDRGSGSRGRFDDRGRSDYD	90
0.88409	-0.885864	1.03931	-2.25941	0.753653	-0.760803	0.794215	-2.48785	0.770988	-0.768776	0.874179	-1.41701	1	O14495	Lipid phosphate phosphohydrolase 3	PPAP2B	YKYDKAIVPESKNGGSPALNNNPRRSGSKRV	19
-0.086899	0.45351	-0.390891	0.0657856	-0.0475432	0.232152	-0.535646	0.0500222	-0.0181075	0.392922	-0.400163	0.0167662	0.993482	O14545	TRAF-type zinc finger domain-containing protein 1	TRAFD1	CNPSRALPSLNTGSSSPRGVEEPDVIFQNFL	327
-0.130508	0.476768	-0.481537	0.109394	0.0829273	0.20228	-0.251245	-0.0804483	-0.0763315	0.525996	-0.528915	0.0749902	0.998916	O14545	TRAF-type zinc finger domain-containing protein 1	TRAFD1	VTEGIPRLDSQPQETSPELPRRRVRHQGDLS	415
0.630942	-0.326809	0.338063	-0.425486	0.184236	-0.368924	0.0681154	-0.0599511	0.299346	-0.49434	0.258675	-0.258675	1	O14639	Actin-binding LIM protein 1	ABLIM1	TSGYDDKQERQSLGESPRTLSPTPSAEGYQD	426
-2.05433	1.21194	-1.20069	2.07395	-2.06269	1.56568	-1.56714	2.2686	-1.42932	1.00693	-1.00337	1.58143	0.992631	O14639	Actin-binding LIM protein 1	ABLIM1	EGYQDVRDRMIHRSTSQGSINSPVYSRHSYT	452
1.51743	-1.51921	1.69624	-3.02623	1.4363	-1.44345	1.53357	-3.95893	1.41884	-1.41663	1.4779	-2.41363	0.998946	O14641	Segment polarity protein dishevelled homolog DVL-2;Segment polarity protein dishevelled homolog DVL-3	DVL2;DVL3	EDDSTSRFSSSTEQSSASRLMRRHKRRRRKQ;EEDTMSRFSSSTEQSSASRLLKRHRRRRKQR	228
-0.522719	0.412448	-0.401193	0.590437	-0.759954	0.544887	-0.546352	0.595587	-0.54221	0.526406	-0.485812	0.485812	0.999927	O14646	Chromodomain-helicase-DNA-binding protein 1	CHD1	SDWQMDHRASSSGPRSPLDQRSPYGSRSPFE	1677
-0.681367	0.70018	-1.08488	0.660253	-0.668536	0.661386	-0.715005	0.856552	-0.615479	0.586547	-0.582994	0.870541	1	O14681	Etoposide-induced protein 2.4 homolog	EI24	RRRRASSVLAQRRAQSIERKQESEPRIVSRI	56
-0.389629	0.323976	-0.312722	0.513654	-0.376796	0.224287	-0.225752	0.604672	-0.167996	0.170208	-0.222039	0.405073	1	O14737	Programmed cell death protein 5	PDCD5	EKTTTVKFNRRKVMDSDEDDDY_________	119
-2.05755	2.05578	-2.7878	2.04766	-2.07363	2.06648	-3.10604	2.07761	-2.95515	2.61456	-2.61101	2.66907	0.859279	O14745	Na(+)/H(+) exchange regulatory cofactor NHE-RF1	SLC9A3R1	AALESPRPALVRSASSDTSEELNSQDSPPKQ	291
-0.0228987	-0.463082	0.0124802	0.0139792	-0.152926	-0.0311057	0.0296411	0.251266	0.0466411	-0.494292	0.01256	-0.01256	1	O14908	PDZ domain-containing protein GIPC1	GIPC1	AFDMISQRSAGGRPGSGPQLGTGRGTLRLRS	232
0.529211	-0.530986	0.712875	-0.856694	0.554426	-0.561576	0.663753	-0.739403	0.658078	-0.655866	0.679171	-1.05042	0.98322	O14920	Inhibitor of nuclear factor kappa-B kinase subunit beta	IKBKB	LLKIACSKVRGPVSGSPDSMNASRLSQPGQL	672
0.104649	-0.308687	0.387227	-0.125762	0.652256	-0.771008	0.545317	-0.537152	0.0931645	-0.186328	0.391161	-0.0945058	0.999913	O14974	Protein phosphatase 1 regulatory subunit 12A	PPP1R12A	QKKQNLLHSEKRDKKSPLIESTANMDNNQSQ	299
0.652674	-0.421598	0.309923	-0.318009	0.509087	-0.282804	0.281339	-0.691101	0.653171	-0.356971	0.360524	-0.573465	0.997307	O15027	Protein transport protein Sec16A	SEC16A	WDRADSGPTQPPLSLSPAPETKRPGQAAKKE	2083
0.547171	-0.390284	0.401539	-0.565628	0.449384	-0.199121	0.197657	-0.991116	0.450326	-0.119412	0.122965	-0.526499	1	O15027	Protein transport protein Sec16A	SEC16A	LERAQQELVPPQQQASPPQLPKAMFSELSNP	1069
0.633125	-0.615582	0.579029	-0.587115	0.391289	-0.326344	0.32488	-0.471277	0.72668	-0.431388	0.434941	-0.593992	0.983597	O15027	Protein transport protein Sec16A	SEC16A	PEDEASGSFFKQIDSSPVGGETDETTVSQNY	569
0.683332	-0.678383	0.689637	-1.0675	0.489319	-0.496469	0.575511	-0.629109	0.500445	-0.59281	0.431135	-0.431135	1	O15042	U2 snRNP-associated SURP motif-containing protein	U2SURP	KHNYRNESARESLCDSPHQNLSRPLLENKLK	67
0.200973	-0.202747	0.437623	-0.243434	-0.0174444	-0.0591199	0.0255304	0.211721	0.0372136	-0.176572	0.779839	-0.0385549	0.976803	O15234	Protein CASC3	CASC3	LRGGGSCSGSAGGGGSGSLPSQRGGRTGALH	45
-0.745482	0.440339	-0.429085	0.764976	-0.646433	0.372122	-0.373587	0.973836	-0.3798	0.382012	-0.442517	0.781715	0.999984	O15234	Protein CASC3	CASC3	EEKPDTKSTVTGERQSGDGQESTEPVENKVG	148
-0.55193	0.220811	-0.140121	0.132036	-0.308585	-0.0043703	0.00290569	0.303649	-0.312256	-0.0826624	0.0862155	0.255368	0.999881	O15344	E3 ubiquitin-protein ligase Midline-1	MID1	NIIDRFQKASVSGPNSPSETRRERAFDANTM	96
0.983501	-0.987859	1.31911	-1.00461	1.12393	-1.13108	1.55971	-1.633	-0.0630312	-1.15523	0.206877	0.0616899	0.96018	O15357	Phosphatidylinositol 3,4,5-trisphosphate 5-phosphatase 2	INPPL1	LSGLEILSKVFDQQSSPMVTRLLQQQNLPQT	241
-0.171114	0.0703133	0.22525	-0.0697541	-0.458984	0.0592683	0.0324686	-0.0243043	-0.132173	0.134385	0.350356	-0.172401	0.960718	O15427	Monocarboxylate transporter 4	SLC16A3	AEPEKNGEVVHTPETSV______________	464
0.102004	0.502091	-0.112422	-0.499515	0.0362211	0.87005	-0.0281352	-0.389692	0.0425382	0.580813	-0.0448077	-0.506441	0.927644	O15446	DNA-directed RNA polymerase I subunit RPA34	CD3EAP	ELPGEGQPEARATPGSTKKRKKQSQESRMPE	459
-0.51551	0.513736	-0.615084	0.71677	-0.688684	0.681534	-0.880043	0.76339	-0.609691	0.490195	-0.474834	0.474834	0.964572	O15446	DNA-directed RNA polymerase I subunit RPA34	CD3EAP	TVPQEEMPGPPLNSESGEEAPTGRDKKRKQQ	490
-0.197918	0.573266	-0.534442	0.176805	-0.165511	0.371618	-0.265541	0.16799	-0.187357	0.460947	-0.42647	0.186015	1	O15541	RING finger protein 113A	RNF113A	__________MAEQLSPGKAVDQVCTFLFKK	6
-0.178354	0.17658	-0.683161	0.159045	-0.164519	0.15737	-0.661769	0.958925	-0.175552	0.177764	-0.324091	0.353561	0.970392	O43149	Zinc finger ZZ-type and EF-hand domain-containing protein 1	ZZEF1	GSLLSWCYLQLKSTDSGAKDLAVDLIEKYVG	984
0.165816	0.291587	-0.651748	-0.18693	-0.0572956	0.739541	-0.58691	0.0597745	-0.0907805	0.396022	-0.477129	0.0894392	1	O43166	Signal-induced proliferation-associated 1-like protein 1	SIPA1L1	SPSGRLMRQDPVVHLSPNKQGHSDSHYSSHS	1270
0.0396021	-0.0237404	0.0349945	-0.599061	-0.0495195	0.2645	0.0576055	-0.531312	-0.0288862	0.0639772	0.0266167	-0.713135	1	O43237	Cytoplasmic dynein 1 light intermediate chain 2	DYNC1LI2	KDFQDYMEPEEGCQGSPQRRGPLTSGSDEEN	194
0.812951	-0.697948	0.709202	-2.65052	0.61703	-0.55359	0.552126	-2.4081	0.813713	-0.702354	0.705907	-2.38338	0.99349	O43237	Cytoplasmic dynein 1 light intermediate chain 2	DYNC1LI2	PRTQGRGGPASVPSSSPGTSVKKPDPNIKNN	407
-1.04524	0.823966	-0.812712	1.31063	-1.64304	1.11382	-1.11528	1.52653	-2.09424	1.4037	-1.40014	1.50625	0.999768	O43314	Inositol hexakisphosphate and diphosphoinositol-pentakisphosphate kinase 2	PPIP5K2	LHYTSGVGTGRRRRRSGEQITSSPVSPKSLA	1006
0.896378	-0.953048	0.760075	-0.768161	1.21632	-0.992348	0.990884	-1.31844	0.269043	-0.266831	0.298298	-0.838914	0.999984	O43318	Mitogen-activated protein kinase kinase kinase 7	MAP3K7	LLKNQAKQQSESGRLSLGASRGSSVESLPPT	367
-1.31683	0.530361	-0.519107	0.855315	-1.02639	0.408824	-0.410288	0.728897	-0.289157	1.00758	-0.0190543	0.0190543	1	O43318	Mitogen-activated protein kinase kinase kinase 7	MAP3K7	VPEIVISGNGQPRRRSIQDLTVTGTEPGQVS	439
0.181241	0.0125824	-0.00132829	-0.733797	0.366652	0.00884653	-0.0103111	-0.547657	0.654885	0.131386	-0.127833	-0.739048	1	O43399	Tumor protein D54	TPD52L2	____MDSAGQDINLNSPNKGLLSDSMTDVPV	12
0.809678	-0.592082	0.603336	-0.939388	0.352044	-0.359194	0.59034	-0.689349	0.275354	-0.0528408	0.0563939	-0.127566	0.997998	O43491	Band 4.1-like protein 2	EPB41L2	RVITEEMNGKEISPGSGPGEIRKVEPVTQKD	718
-0.649693	0.597629	-0.586375	0.658308	-0.509354	0.502204	-0.634876	0.998757	-0.521294	0.523506	-0.582012	0.703344	0.817844	O43491	Band 4.1-like protein 2	EPB41L2	KEKPKEVAENQQNQSSDPEEEKGSQPPPAAE	39
-0.0249933	-0.0690312	0.0145748	0.13586	-0.0134174	0.272706	-0.00954518	0.0158963	-0.297643	0.114136	-0.0671086	0.0671086	0.974721	O43491	Band 4.1-like protein 2	EPB41L2	EEKGSQPPPAAESQSSLRRQKREKETSESRG	58
-0.250883	0.249109	-0.731274	0.278041	-0.598675	0.591525	-0.885737	0.669996	-0.537096	0.692181	-0.796227	0.535755	0.859558	O43493	Trans-Golgi network integral membrane protein 2	TGOLN2	SHPEPQTPKDSPSKSSAEAQTPEDTPNKSGA	71
0.884639	-1.02867	0.858649	-0.866735	0.451771	-0.484769	0.576967	-0.449292	0.646477	-0.58526	0.588813	-0.674397	0.999981	O43583	Density-regulated protein	DENR	EKNFPNEFAKLTVENSPKQEAGISEGQGTAG	73
0.33473	-0.336504	0.498885	-0.748655	0.601109	-0.608259	0.95824	-1.0596	0.504554	-0.631887	0.81497	-0.505895	0.998984	O43598	2'-deoxynucleoside 5'-phosphate N-hydrolase 1	DNPH1	LDRYFEADPPGQVAASPDPTT__________	169
0.481279	-0.439694	0.444973	-0.453058	1.02099	-1.10563	1.09413	-1.01851	0.149015	-0.146803	0.765861	-0.982931	1	O43663	Protein regulator of cytokinesis 1	PRC1	KSDATSGILNSTNIQS_______________	620
-0.505283	0.503509	-0.972365	1.26877	-0.548961	0.541811	-1.34845	1.19804	-0.606853	0.609065	-1.29776	1.09869	0.999686	O43719	HIV Tat-specific factor 1	HTATSF1	ESEEGCPKRGFEGSCSQKESEEGNPVRGSEE	481
-0.708371	0.269735	-0.258481	1.03802	-0.769126	0.210945	-0.21241	0.325045	-0.703781	0.551529	-0.547976	0.597905	0.999842	O43719	HIV Tat-specific factor 1	HTATSF1	FLNAPEANRGLRRSDSVSASERAGPSRARHF	387
-1.21986	-0.411425	1.32135	0.411984	-2.07877	-0.481545	1.47991	0.474474	-2.00275	-0.484421	1.30241	0.488902	1	O43719	HIV Tat-specific factor 1	HTATSF1	KFEKTEDGGEFEEGASENNAKESSPEKEAEE	445
0.205186	-0.20696	0.652234	-0.793014	0.541147	-0.548297	1.03947	-1.05026	0.191488	-0.0013425	-0.078204	0.00582372	1	O43765	Small glutamine-rich tetratricopeptide repeat-containing protein alpha	SGTA	FEAAATGKEMPQDLRSPARTPPSEEDSAEAE	77
-0.249942	0.167651	-0.156397	0.345284	0.0522155	-0.486438	0.463801	-0.0497365	-0.755709	0.583745	-0.580192	1.56377	0.984261	O43765	Small glutamine-rich tetratricopeptide repeat-containing protein alpha	SGTA	ELIEQLRSQIRSRTPSASNDDQQE_______	305
0.44335	-0.534697	0.00497592	-0.0130612	0.44486	-0.681658	0.060801	-0.0526367	0.586163	-0.77432	-0.00873424	0.00873424	0.999999	O43768	Alpha-endosulfine	ENSA	______________MSQKQEEENPAEETGEE	2
0.891291	-0.772185	0.783439	-1.15596	1.04736	-0.778305	0.77684	-1.57872	0.888925	-0.713719	0.717273	-0.914055	1	O43768	Alpha-endosulfine;cAMP-regulated phosphoprotein 19	ENSA;ARPP19	DFLMKRLQKGQKYFDSGDYNMAKAKMKNKQL;DFLRKRLQKGQKYFDSGDYNMAKAKMKNKQL	67
0.673156	-0.538769	0.550024	-1.92775	0.711182	-0.49977	0.498306	-2.09105	0.581448	-0.453523	0.457076	-0.848061	0.995303	O43815	Striatin	STRN	LRDVDELPSLQPSVGSPSRPSSSRLPEHEIN	376
0.416672	-0.504937	1.20893	-0.437786	0.141954	-0.397306	1.05183	-0.139475	0.33624	-0.817228	1.10469	-0.337581	1	O43823	A-kinase anchor protein 8	AKAP8	NQRLDMMSKEGGRGGSGGGGEGIQDRESSFR	112
-0.466808	0.465034	-0.755254	0.620416	-0.845134	0.468955	-0.470419	0.902383	-1.07517	0.330156	-0.280461	0.280461	1	O43823	A-kinase anchor protein 8	AKAP8	EPDTKLARVDSEGDFSENDDAAGDFRSGDEE	328
0.225958	-0.482956	0.52086	-0.247071	0.217239	-0.231212	0.61024	-0.21476	-0.344273	-0.00155153	0.255888	0.00603275	0.985273	O43829	Zinc finger and BTB domain-containing protein 14	ZBTB14	IRFLDKLCSQKRDVSSPDENNGQSKSKYCLK	132
0.191468	-0.801274	0.405338	-0.212581	0.202677	-0.697168	0.301335	-0.200198	0.28159	-0.853681	0.00290166	-0.00290166	0.999818	O43847	Nardilysin	NRD1	ARLGADESEEEGRRGSLSNAGDPEIVKSPSD	94
-0.279412	0.162012	-0.150758	0.21474	-0.318813	0.27718	-0.278645	0.602071	-0.267807	0.281407	-0.222946	0.222946	1	O43896	Kinesin-like protein KIF1C	KIF1C	RRPPSPRRSHHPRRNSLDGGGRSRGAGSAQP	1033
-0.563097	0.561323	-0.696332	0.761435	-0.445313	0.438163	-0.579567	0.920768	-0.439876	0.442088	-0.677051	0.587193	0.89094	O43933	Peroxisome biogenesis factor 1	PEX1	LRADISIIKGRYRSQSGEDESMNQPGPIKTR	1211
-0.442767	0.228421	-0.217166	0.606572	-0.70163	0.0529372	-0.0544018	0.384261	-0.37182	0.374032	-0.487771	0.391902	1	O60231	Putative pre-mRNA-splicing factor ATP-dependent RNA helicase DHX16	DHX16	KKKTGGSKQQTEKPESEDEWERTERERLQDL	160
0.1918	-0.24942	0.189461	-0.197546	0.728574	-0.72975	0.728285	-1.55096	1.06743	-0.953893	0.957446	-1.52324	0.904916	O60239	SH3 domain-binding protein 5	SH3BP5	SSSGSGGSSKSQSSTSPEGQALENRMKQLSL	421
0.489823	0.0346609	-0.0234068	-0.108509	0.498037	0.0186186	-0.0200832	-0.201506	0.592789	-0.0774847	0.0810378	-0.420228	0.999126	O60271	C-Jun-amino-terminal kinase-interacting protein 4	SPAG9	ELSQPRSHTSLKVSNSPEPQKAVEQEDELSD	251
0.771125	0.000161841	0.0110922	-0.915818	1.02967	-0.0904075	0.0889429	-0.903716	0.934487	-0.0701342	0.0736873	-2.48854	0.984952	O60291	E3 ubiquitin-protein ligase MGRN1	MGRN1	SSPESFITEEVDESSSPQQGTRAASIENVLQ	506
-0.00513968	0.00336558	0.0931859	-0.702011	0.0143976	-0.0215476	0.176188	-0.578899	0.082048	-0.0608366	0.0643896	-0.58255	0.999959	O60292	Signal-induced proliferation-associated 1-like protein 3	SIPA1L3	IMDNLGPEQERDTGQSPQKGLQRTLSDESLC	1534
0.605627	-0.444187	0.226188	-0.234273	1.41138	-0.685749	0.684284	-1.34327	1.34326	-0.590339	0.593892	-0.876817	0.993719	O60292	Signal-induced proliferation-associated 1-like protein 3	SIPA1L3	DWPPKREALREHSNPSPSQDTDGTKATKMAH	100
1.36849	-1.37027	1.48292	-1.50211	0.959617	-0.966767	1.18209	-1.52104	1.16894	-1.08858	1.09213	-1.12941	0.91221	O60337	E3 ubiquitin-protein ligase MARCH6	2006-03-01	QRLVNYERKSGKQGSSPPPPQSSQE______	901
-0.64593	0.151239	-0.139985	0.348395	-0.542152	0.864196	-0.815508	0.544631	-0.236187	0.363347	-0.140311	0.140311	0.999964	O60341	Lysine-specific histone demethylase 1A	KDM1A	LPPPPPQAPPEEENESEPEEPSGVEGAAFQS	166
0.824999	-0.796098	0.807353	-1.31329	0.716645	-0.645897	0.644432	-0.89016	0.572285	-0.819722	0.602081	-0.573626	0.999963	O60341	Lysine-specific histone demethylase 1A	KDM1A	YTLPRQATPGVPAQQSPSM____________	849
-0.825769	0.638776	-0.627522	1.23598	-0.483792	0.100322	-0.101787	0.277997	-1.17757	1.08659	-1.08303	1.20687	0.995544	O60343	TBC1 domain family member 4	TBC1D4	DSGFDEQQEFRSRCSSVTGVQRRVHEGSQKS	318
-0.401028	0.229463	0.241985	-0.228904	-0.643208	-0.120835	0.154697	0.113764	-0.58245	0.0220086	0.198302	-0.0175274	0.997428	O60353	Frizzled-6	FZD6	SRLSGEQVDGKGQAGSVSESARSEGRISPKS	641
0.232717	-0.145612	0.156866	-0.958182	-0.0215368	0.0143869	0.0502731	-0.669335	0.255962	-0.25375	0.353358	-0.830786	1	O60504	Vinexin	SORBS3	YPSSTRDPSASNGGGSPARREEKKRKAARLK	373
-0.0597908	0.0580167	-0.164487	0.186877	-0.27481	0.105644	-0.107108	0.218158	-0.0981331	0.100345	-0.291486	0.617922	0.999962	O60504	Vinexin	SORBS3	EPRLRLCDDGPQLPTSPRLTAAARSARHPSS	530
1.66371	-0.145863	0.157117	-0.318292	1.48911	-0.471131	0.469667	-0.830127	1.69018	-0.292391	0.295944	-1.29907	1	O60566	Mitotic checkpoint serine/threonine-protein kinase BUB1 beta	BUB1B	RKPGKEEGDPLQRVQSHQQASEEKKEKMMYC	384
0.133248	0.172504	-0.143667	-0.435846	0.113706	0.116962	-0.10562	-0.57699	0.11803	0.103447	-0.0998935	-0.643224	0.985528	O60684	Importin subunit alpha-7	KPNA6	__________METMASPGKDNYRMKSYKNNA	6
-0.33129	1.24394	-0.293982	0.285897	-0.0994762	0.0923262	-0.0974659	0.595447	-0.0845039	-0.188172	0.14723	0.0831626	0.999468	O60762	Dolichol-phosphate mannosyltransferase subunit 1	DPM1	_______MASLEVSRSPRRSRRELEVRSPRQ	9
0.951639	-0.653293	0.664547	-0.762118	0.709285	-0.442642	0.441177	-1.03382	0.425631	-0.214015	0.217568	-0.379065	0.969376	O60784	Target of Myb protein 1	TOM1	LEERAKAADRLPNLSSPSAEGPPGPPSGPAP	462
0.630726	-0.6325	1.01412	-1.05728	1.11543	-0.743221	0.741756	-1.15588	0.496112	-0.4939	0.802167	-0.73697	0.938528	O60828	Polyglutamine-binding protein 1	PQBP1	DPNSVVTKSAKKLRSSNADAEEKLDRSHDKS	95
-0.460882	0.434429	-0.423175	0.513556	-1.11693	0.25424	-0.255705	0.417905	-0.351455	0.353667	-0.380336	0.360938	0.993814	O60832	H/ACA ribonucleoprotein complex subunit 4	DKC1	AKAGLESGAEPGDGDSDTTKKKKKKKKAKEV	494
-0.519055	0.448774	-0.43752	0.557435	-0.42027	0.41312	-0.426144	0.725989	-0.384438	0.397364	-0.451862	0.383097	1	O60832	H/ACA ribonucleoprotein complex subunit 4	DKC1	KKKKKKKKAKEVELVSE______________	513
-0.240482	0.238708	-0.231818	0.240003	-0.564701	0.206265	-0.20773	0.54877	-0.239382	0.0755595	-0.0720064	0.313036	1	O60841	Eukaryotic translation initiation factor 5B	EIF5B	KKGQKGKKQSFDDNDSEELEDKDSKSKKTAK	113
-0.368594	0.36682	-0.488623	0.57948	-0.47824	0.329539	-0.331003	0.547587	-0.32247	0.324682	-0.460143	0.715933	1	O60841	Eukaryotic translation initiation factor 5B	EIF5B	KAKGKAQKSNKKWDGSEEDEDNSKKIKERSR	164
-0.3703	0.284255	-0.273001	0.516592	-0.375491	0.368341	-0.472557	0.631455	-0.164716	0.166928	-0.356963	0.308463	1	O60841	Eukaryotic translation initiation factor 5B	EIF5B	GQKKNQKNKPGPNIESGNEDDDASFKIKTVA	214
-0.608956	0.607181	-1.14915	1.77038	-0.800126	0.656878	-0.658342	2.02498	-0.676105	0.678316	-1.04094	1.98882	0.994849	O60934	Nibrin	NBN	HPSTGLKTTTPGPSLSQGVSVDEKLMPSAPV	343
0.289162	0.0707417	-0.0594876	-1.16215	0.107327	0.061138	-0.0626026	-0.392359	0.163665	0.101674	-0.216805	-0.0971925	0.999996	O75044	SLIT-ROBO Rho GTPase-activating protein 2;SLIT-ROBO Rho GTPase-activating protein 2B;SLIT-ROBO Rho GTPase-activating protein 2C	SRGAP2;SRGAP2B;SRGAP2C	QIGKSVKQEDRQTPRSPDSTANVRIEEKHVR	206
-0.758008	-0.0887333	0.0999874	1.23624	-0.276617	0.329426	0.106748	-0.0985835	-0.525262	0.436847	-0.433294	0.704215	1	O75116	Rho-associated protein kinase 2	ROCK2	ARSSPRTSMKIQQNQSIRRPSRQLAPNKPS_	1374
-0.0803904	0.730408	-0.261095	0.0592769	-0.70925	0.339929	-0.172221	0.180385	0.0206809	0.298231	-0.0469307	-0.0220222	1	O75122	CLIP-associating protein 2	CLASP2	RGRSRTKMVSQSQPGSRSGSPGRVLTTTALS	459
0.803845	-1.22639	0.723665	-0.731751	-0.11871	0.11156	-0.301667	0.172133	0.601362	-0.372364	0.375917	-0.716035	0.955918	O75122	CLIP-associating protein 2	CLASP2	NHLRNTGNGTQSSMGSPLTRPTPRSPANWSS	892
0.0169522	-0.0208443	-0.0273707	0.364084	0.098896	0.0304833	-0.127271	-0.0375549	-0.0688865	0.094381	-0.0904054	0.0675451	0.857037	O75122	CLIP-associating protein 2	CLASP2	AGSSKASSLPGSLQRSRSDIDVNAAAGAKAH	368
0.109694	0.233158	-0.120113	-0.180986	0.199473	0.380559	-0.191387	-0.267025	0.193471	0.204858	-0.19574	-0.308918	0.986223	O75122	CLIP-associating protein 2	CLASP2	GSVASLPQSDRSSSSSQESLNRPFSSKWSTA	327
-0.0869287	-1.24246	0.0765102	0.188493	1.07648	-0.43039	0.428926	-0.766089	-0.552639	0.267322	-0.263769	0.429016	1	O75128	Protein cordon-bleu	COBL	NRNNNAGSFDSEGVASRRDSLAPLQAEHSQP	574
-0.0641443	-0.412627	0.419263	0.0430309	-0.248116	-0.471051	0.613478	0.250594	0.0902282	-0.0948773	0.00667082	-0.00667082	0.999878	O75147	Obscurin-like protein 1	OBSL1	______MKASSGDQGSPPCFLRFPRPVRVVS	10
-0.865195	0.72876	-0.706305	0.69822	-0.951314	0.580808	-0.582272	0.811158	-0.673177	0.444635	-0.441081	0.781919	0.990049	O75151	Lysine-specific demethylase PHF2	PHF2	MAPGVFLTQRRPSASSPNNNTAAKGKRTKKG	1059
0.913258	-0.626267	0.637521	-1.12952	1.17786	-0.856531	0.855066	-2.171	0.579499	-0.263324	0.251903	-0.251903	1	O75152	Zinc finger CCCH domain-containing protein 11A	ZC3H11A	QLSVQQNKLSVQSNPSPQLRSVMKVESSENV	132
0.351362	-0.120536	0.13179	-0.362367	0.244208	-0.251358	0.286586	-0.500476	-0.238308	-0.596084	0.236039	0.710529	0.999998	O75152	Zinc finger CCCH domain-containing protein 11A	ZC3H11A	LFLPPSKTVLPTVPESPEEEVKASQLSVQQN	108
-0.343709	0.302542	-0.291288	0.450945	-0.453355	-0.0437527	0.0422881	0.181189	-0.290758	0.29297	-0.306429	0.412706	1	O75153	Clustered mitochondria protein homolog	CLUH	SLESKSEDPPGQEAGSEEEGSSASGLAKVKE	664
-0.334732	0.523917	-0.483884	0.313618	-0.366974	0.499019	-0.548591	0.369452	-0.287401	0.573146	-0.442992	0.28606	0.99983	O75175	CCR4-NOT transcription complex subunit 3	CNOT3	DDKKRGRSTDSEVSQSPAKNGSKPVHSNQHP	299
-0.379123	0.377349	-0.48684	0.597261	-0.510324	0.503175	-0.578267	0.770979	-1.37314	1.42424	-1.93549	1.3718	0.999924	O75179	Ankyrin repeat domain-containing protein 17	ANKRD17	PGGVSRNSPLDCGSASPNKVASSSEQEAGSP	2067
2.24552	-1.5333	1.54455	-2.90962	1.32384	-0.790778	0.789313	-0.850463	1.901	-0.996162	0.999716	-1.79327	0.997281	O75330	Hyaluronan mediated motility receptor	HMMR	KAPLKRFNDPSGCAPSPGAYDVKTLEVLKGP	20
1.85714	-1.29009	1.30134	-1.8226	1.66914	-1.09932	1.09785	-2.4366	1.3796	-0.913078	0.916631	-2.02749	0.999432	O75330	Hyaluronan mediated motility receptor	HMMR	SKQNLNVDKDTTLPASARKVKSSESKESQKN	65
-0.423889	0.422115	-0.495885	0.442486	-0.312173	0.305023	-0.551342	0.560808	-0.367888	0.3701	-0.641915	0.486459	1	O75351	Vacuolar protein sorting-associated protein 4B	VPS4B	VKEGQPSPADEKGNDSDGEGESDDPEKKKLQ	102
1.27467	-1.27644	1.62579	-2.64654	1.2568	-1.26395	1.69728	-3.07348	1.12642	-1.12421	1.34174	-2.52319	0.999839	O75369	Filamin-B	FLNB	TRGAGGQGKLDVTILSPSRKVVPCLVTPVTG	983
0.759487	-0.731206	0.700683	-0.708769	0.446662	-0.62562	0.512141	-0.444183	0.154769	-1.25997	0.0885784	-0.0885784	1	O75391	Sperm-associated antigen 7	SPAG7	EEAMNEIRAKKRLRQSGEELPPTS_______	219
0.495461	-0.347176	0.35843	-1.31608	0.0928677	-0.171949	0.0744462	-0.0662819	0.146603	-0.504182	-0.148872	0.151041	0.995921	O75391	Sperm-associated antigen 7	SPAG7	QRQEEEAAQQGPVVVSPASDYKDKYSHLIGK	158
0.0278297	-0.232578	0.202229	-0.0489431	0.0555804	-0.133698	0.259393	-0.0531015	0.0250563	-0.0228445	0.0265163	-0.166343	0.96532	O75396	Vesicle-trafficking protein SEC22b	SEC22B	GEALSALDSKANNLSSLSKKYRQDAKYLNMR	175
-0.135738	0.0649265	-0.0536724	1.60459	-0.862991	0.0329301	-0.0343947	0.90206	-0.783046	0.279991	-0.276438	0.628497	0.99894	O75396	Vesicle-trafficking protein SEC22b	SEC22B	TKKLYIDSRARRNLGSINTELQDVQRIMVAN	137
0.21922	-0.0781041	0.0893582	-0.547763	0.728551	0.526085	-0.738297	-0.533157	-0.00513895	0.00735072	-0.48083	0.0705346	0.991759	O75427	Leucine-rich repeat and calponin homology domain-containing protein 4	LRCH4	SFLFRSSSQSGSGPSSPDSVLRPRRYPQVPD	521
0.373836	-0.37561	0.603344	-1.00404	0.0993564	-0.106506	0.432446	-0.204425	-0.127752	0.0221042	-0.0185512	0.124434	0.999424	O75436	Vacuolar protein sorting-associated protein 26A	VPS26A	EKLRKQRTNFHQRFESPESQASAEQPEM___	315
-0.284361	0.175524	-0.16427	0.578663	0.0761706	-0.0833206	-0.251708	0.640509	-0.0671151	0.0693268	-0.623564	0.664833	1	O75459	P antigen family member 1	PAGE1	DEGASAAQGQEPEADSQELVQPKTGCELGDG	63
-0.523187	0.521413	-0.549284	0.806602	-0.351418	0.344268	-0.854553	0.929456	-0.450274	0.452485	-1.55024	1.01675	0.999999	O75459	P antigen family member 1	PAGE1	PNPEEVKTPEEDEGQSQP_____________	144
-0.00543052	-0.298898	-0.004988	0.335548	0.0779074	-0.302536	-0.0698214	0.251232	0.278537	-0.276325	-0.396119	0.397958	1	O75459	P antigen family member 1	PAGE1	EQMKLPAEGPEPEADSQEQVHPKTGCERGDG	105
-0.415411	0.413637	-1.74822	0.505252	-0.400289	0.393139	-1.68207	0.608106	-0.426191	0.469015	-2.33965	0.424849	0.999191	O75475	PC4 and SFRS1-interacting protein	PSIP1	KFSSQQAATKQSNASSDVEVEEKETSVSKED	106
-0.196253	0.194479	-0.190956	0.444872	-0.284326	0.277176	-0.354639	0.48978	-0.074979	-0.130362	0.0727095	0.2177	0.999834	O75494	Serine/arginine-rich splicing factor 10	SRSF10	SPRNSRPTGRPRRSRSHSDNDRFKHRNRSFS	158
-0.0742145	0.736343	-0.0835971	0.0531011	-0.307729	0.39403	-0.27683	0.284995	-0.226385	0.447474	-0.112051	0.112051	0.998431	O75528	Transcriptional adapter 3	TADA3	PDMSGKESGADGASTSPRNQNKPFSVPHTKS	298
0.0959366	-0.561336	1.08905	-0.11705	0.234231	-0.503507	1.14282	-0.231752	0.433425	-0.465496	1.15254	-0.434766	0.890708	O75554	WW domain-binding protein 4	WBP4	SDPETQKEKSIQKQNSLGSNEEKSKTLKKSN	277
-0.0313149	-0.400202	0.241533	0.0102015	-0.0502216	-0.3472	0.0583075	0.277227	-0.309212	0.255416	-0.251863	0.425478	0.997913	O75592	E3 ubiquitin-protein ligase MYCBP2	MYCBP2	ILPARVKAIPRRRVNSGDTEVGSSLLRHPSP	3505
-0.569925	0.568151	-0.572467	0.769226	-0.364882	0.357732	-0.388029	0.738599	-0.401285	0.403497	-0.501997	0.721739	1	O75643	U5 small nuclear ribonucleoprotein 200 kDa helicase	SNRNP200	EEGDEDVYGEVREEASDDDMEGDEAVVRCTL	225
-0.51236	0.510586	-1.43704	0.641356	-0.446821	0.439671	-1.3386	0.722475	-0.409239	0.503735	-1.29386	0.407898	0.998768	O75665	Oral-facial-digital syndrome 1 protein	OFD1	PSLHLLEAFKNITSSSPERHIFGEDRVVSEQ	686
0.687268	-0.689042	0.858717	-2.24052	0.448735	-0.455885	0.527435	-1.66889	0.567376	-0.524591	0.528144	-1.16527	0.879057	O75674	TOM1-like protein 1	TOM1L1	TTSEPSAPSQDLLDLSPSPRMPRATLGELNT	321
0.594087	-0.595861	0.632713	-1.28506	0.578197	-0.560109	0.545634	-0.53747	0.498831	-0.496619	0.505357	-0.596285	0.99801	O75694	Nuclear pore complex protein Nup155	NUP155	DTLQELVNQSKAAPQSPSVPKKPGPPVLSSD	992
-0.126678	0.124904	-0.268858	0.132858	-0.276992	0.269842	-0.458065	0.415474	-0.141027	0.135348	-0.131795	0.281482	1	O75909	Cyclin-K	CCNK	PQPSSPRQVKRAVVVSPKEENKAAEPPPPKI	340
-1.1176	1.12894	-1.15966	1.09649	-1.4355	1.42835	-1.58904	1.69649	-1.40216	1.46182	-1.53065	1.40081	0.973582	O75925	E3 SUMO-protein ligase PIAS1	PIAS1	EEPSAKRTCPSLSPTSPLNNKGILSLPHQAS	488
1.08724	-0.850691	0.861946	-1.1774	0.164794	-0.136977	0.135513	-0.38026	0.095662	-0.000256684	-0.145551	0.0047379	0.943611	O75970	Multiple PDZ domain protein	MPDZ	EKKNSSQSLMVPQSGSPEPESIRNTSRSSTP	1595
-1.66132	1.87114	-1.58576	1.57767	-0.98529	1.05747	-0.896748	0.904912	-1.52998	1.82664	-1.59661	1.52864	1	O76021	Ribosomal L1 domain-containing protein 1	RSL1D1	ASETPKAAESETPGKSPEKKPKIKEEAVKEK	427
-0.39852	0.339599	-0.250126	0.242041	-0.261701	0.248414	-0.249879	0.377478	-0.107895	0.110107	-0.142819	0.18387	0.997024	O76021	Ribosomal L1 domain-containing protein 1	RSL1D1	KKRGRGKAQVKATNESEDEIPQLVPIGKKTP	361
0.564004	-0.452655	0.463909	-1.60565	0.424682	-0.349189	0.347725	-1.09708	0.595356	-0.513909	0.517462	-0.959652	0.977359	O76021	Ribosomal L1 domain-containing protein 1	RSL1D1	PEKKPKIKEEAVKEKSPSLGKKDARQTPKKP	443
-0.222482	0.191696	-0.180442	0.455726	-0.262693	0.198012	-0.199476	0.532632	-0.208835	0.259461	-0.250686	0.207494	1	O76070	Gamma-synuclein	SNCG	GEASKEKEEVAEEAQSGGD____________	124
0.676213	0.0842839	-0.0730298	-0.354333	0.544016	0.0662811	-0.124657	-0.0733527	0.474564	0.0356557	-0.0321027	-0.428709	0.999928	O94761	ATP-dependent DNA helicase Q4	RECQL4	GPEASAFQEVSIRVGSPQPSSSGGEKRRWNE	251
0.102805	-0.489386	0.138939	-0.123919	0.391413	-0.706693	0.332866	-0.324701	0.50259	-0.864021	0.60862	-0.503931	0.999999	O94762	ATP-dependent DNA helicase Q5	RECQL5	QPTPAKDTWKGKRPRSQQENPESQPQKRPRP	858
-0.123512	0.121738	-0.206328	0.265478	-0.599447	0.376221	-0.377686	0.454302	-0.157678	0.357323	-0.328575	0.156337	1	O94762	ATP-dependent DNA helicase Q5	RECQL5	APEKYTGEEDGAGGHSPAPPQTEECLRERPS	815
0.123449	-0.690333	0.307706	-0.144562	0.135115	-0.526878	0.237564	-0.132636	0.208065	-0.486829	0.235863	-0.209406	0.970498	O94776	Metastasis-associated protein MTA2	MTA2	FSANGRPLASGIRSSSQPAAKRQKLNPADAP	587
0.075156	0.000338835	-0.185074	0.000220336	-0.016622	0.00947204	-0.230264	0.145412	0.121227	0.0656374	-0.145414	-0.0611562	1	O94804	Serine/threonine-protein kinase 10	STK10	QVAQEKQVAEQGGDLSPAANRSQKASQSRPN	438
-0.737923	0.679367	-0.632794	0.624709	-0.734633	0.6216	-0.623064	0.899308	-0.454647	0.456859	-0.560019	0.609057	0.999184	O94806	Serine/threonine-protein kinase D3	PRKD3	______________MSANNSPPSAQKSVLPT	2
-0.710058	0.759651	-0.677223	0.669138	-0.688265	0.622132	-0.623597	0.780789	-0.539016	0.541228	-0.546569	0.553189	0.997806	O94806	Serine/threonine-protein kinase D3	PRKD3	__________MSANNSPPSAQKSVLPTAIPA	6
-0.0340399	0.0322658	-0.320562	0.365923	-1.08247	0.438532	-0.439997	0.79983	-1.26269	0.83581	-0.767317	0.767317	0.984694	O94826	Mitochondrial import receptor subunit TOM70	TOMM70A	GLKRNSERKTPEGRASPAPGSGHPEGPGAHL	91
-0.552975	0.473658	-0.185395	0.17731	-0.473494	0.230449	-0.231914	0.421634	-0.36033	0.195515	-0.191962	0.31543	0.999781	O94874	E3 UFM1-protein ligase 1	UFL1	YKIKKVKKKGRKDDDSDDESQSSHTGKKKPE	458
-1.6034	0.849975	-0.838721	1.05906	-1.61571	0.819378	-0.820843	1.2394	-1.78182	0.848765	-0.845212	0.998911	0.989044	O94874	E3 UFM1-protein ligase 1	UFL1	LSSSIKDLVLKSRKSSVTEE___________	790
-1.96567	1.6544	-1.64315	1.73906	-1.88056	1.68973	-1.6912	2.15864	-1.57385	1.57606	-2.58702	1.62322	0.998913	O94875	Sorbin and SH3 domain-containing protein 2	SORBS2	SSTTLTKSFTSSSPSSPSRAKGGDDSKICPS	302
0.138828	-0.079659	0.0909131	-0.133396	-0.0125494	-0.0555754	0.0206354	0.113535	0.118009	-0.0101468	-0.0838969	0.014628	1	O94979	Protein transport protein Sec31A	SEC31A	DRLCRAQGEPVAGHESPKIPYEKQQLPKGRP	799
0.206147	-0.207921	0.424072	-0.536015	0.140657	-0.147807	0.502142	-0.427429	0.188005	-0.185794	0.500501	-0.493017	0.999301	O95049	Tight junction protein ZO-3	TJP3	ALARSSEPVQADESQSPRDRGRISAHQGAQV	856
-0.0173245	-0.493424	0.00690596	0.182553	-0.0070355	-0.36634	0.0151215	0.0172372	-0.119734	-0.189201	0.117465	0.122338	1	O95071	E3 ubiquitin-protein ligase UBR5	UBR5	SQSSYIIRNPQQRRISQSQPVRGRDEEQDDI	1549
-0.46035	0.332481	-0.321227	0.773247	-0.873167	0.342391	-0.343856	0.847147	-0.696706	0.364226	-0.360673	0.808071	0.824187	O95155	Ubiquitin conjugation factor E4 B	UBE4B	SNSLETQSQSLSRSQSMDIDGVSCEKSMSQV	105
-0.407013	0.606827	-0.76463	0.385899	-0.36121	0.35406	-0.890034	0.597549	-0.305894	0.308106	-0.734054	0.508711	0.98919	O95155	Ubiquitin conjugation factor E4 B	UBE4B	AHRSQSSEGVSSLSSSPSNSLETQSQSLSRS	88
-0.441605	0.439831	-0.596813	0.427989	-0.659478	0.454477	-0.455942	0.864106	-0.348297	0.370248	-0.404003	0.346956	1	O95218	Zinc finger Ran-binding domain-containing protein 2	ZRANB2	GFNERENVEYIEREESDGEYDEFGRKKKKYR	120
-0.480082	0.478308	-0.561314	0.568571	-0.547043	0.539893	-0.67127	0.829989	-0.332698	0.433893	-0.296276	0.296276	1	O95218	Zinc finger Ran-binding domain-containing protein 2	ZRANB2	AVGPASILKEVEDKESEGEEEDEDEDLSKYK	153
-0.348481	0.400082	-0.785004	0.327368	-0.367094	0.219559	-0.221023	0.472528	-0.541616	0.543827	-1.15473	0.651003	1	O95218	Zinc finger Ran-binding domain-containing protein 2	ZRANB2	EDEDDADLSKYNLDASEEEDSNKKKSNRRSR	188
-0.631023	0.629249	-0.868046	0.704219	-0.837169	0.621728	-0.623193	0.787577	-0.412041	0.727067	-0.6036	0.410699	1	O95232	Luc7-like protein 3	LUC7L3	SDTKNEVNGTSEDIKSEGDTQSN________	425
-0.422008	0.582299	-0.390934	0.382849	-0.447553	0.440403	-0.452449	0.698327	-0.522857	0.209826	-0.206273	0.341067	1	O95232	Luc7-like protein 3	LUC7L3	VNGTSEDIKSEGDTQSN______________	431
0.45057	-0.373906	0.38516	-1.37244	0.526525	-0.533675	0.58973	-1.0033	0.725226	-0.723015	0.867046	-2.14242	0.99987	O95235	Kinesin-like protein KIF20A	KIF20A	FPSLHSFIKEHSLQVSPSLEKGAKADTGLDD	532
1.53967	-1.54144	1.59398	-3.53014	1.39771	-1.33299	1.33153	-3.90702	1.07369	-1.07148	1.12063	-1.77729	1	O95235	Kinesin-like protein KIF20A	KIF20A	IAEQYHTVLKLQGQVSAKKRLGTNQENQQPN	825
1.63265	-1.3971	1.40835	-1.98653	0.499744	-0.314914	0.313449	-2.1649	1.23417	-0.387715	0.391268	-0.932753	0.999699	O95239	Chromosome-associated kinesin KIF4A;Chromosome-associated kinesin KIF4B	KIF4A;KIF4B	KKRALASNTSFFSGCSPIEEEAH________	1225
-0.745563	0.516873	-0.505619	1.03676	-0.768634	0.425182	-0.426647	1.22599	-0.636907	0.639119	-0.678259	1.18562	0.99093	O95243	Methyl-CpG-binding domain protein 4	MBD4	HTDILKRGSEMDNNCSPTRKDFTGEKIFQED	387
0.908741	-0.861666	0.661066	-0.669152	1.46844	-1.04914	1.04767	-3.47928	0.779617	-0.325886	0.329439	-0.485146	0.999952	O95248	Myotubularin-related protein 5	SBF1	HGKGVVGLFKAQNAPSPGQSQADSSSLEQEK	1229
-2.71745	2.17327	-2.16202	2.22014	-0.925588	0.918438	-0.975448	1.33347	-1.56181	1.11144	-1.10789	1.30582	0.99536	O95251	Histone acetyltransferase KAT7	KAT7	VTRSSARLSQSSQDSSPVRNLQSFGTEEPAY	57
1.49461	-1.49638	2.22713	-1.76018	1.32078	-1.32793	1.96181	-2.87369	0.81214	-1.05557	1.3873	-0.813481	0.984263	O95292	Vesicle-associated membrane protein-associated protein B/C	VAPB	KEEDGLRMRKTVQSNSPISALAPTGKEEGLS	206
0.0830544	0.0344962	-0.0232421	-0.143313	0.677074	-0.166599	0.165134	-0.726193	-0.028435	0.0306467	-0.188607	0.0798668	0.995608	O95295	SNARE-associated protein Snapin	SNAPIN	ARRRAMLDSGIYPPGSPGK____________	133
0.910993	-0.912767	1.02577	-2.18662	0.48481	-0.49196	0.501848	-2.09511	0.795893	-0.317011	0.320564	-1.98977	1	O95359	Transforming acidic coiled-coil-containing protein 2	TACC2	HTGVPGHVPRSTCAPSPQREVLTVPEANSEP	1635
-0.101775	0.799067	-0.26699	0.0806618	-0.15196	0.877006	-0.141967	0.150131	0.015496	0.514458	-0.24588	-0.0168373	0.999962	O95359	Transforming acidic coiled-coil-containing protein 2	TACC2	EAGEVTPSDSGGQEDSPAKGLSVRLEFDYSE	2256
-0.406075	0.306409	-0.295155	0.54882	-0.341429	0.278136	-0.279601	0.606477	-0.420848	0.331355	-0.327801	0.562031	1	O95359	Transforming acidic coiled-coil-containing protein 2	TACC2	EGVVPPASGGGRVQNSPPVGRKTLPLTTAPE	2226
-0.406935	0.24459	-0.233336	0.465032	-0.305298	0.0851079	-0.0865725	0.741437	-0.101106	0.103318	-0.107693	1.02107	0.98146	O95361	Tripartite motif-containing protein 16	TRIM16	VGSSEKLGRETEEQDSDSAEQGDPAGEGKEV	60
-0.452336	0.158479	-0.147225	0.415282	0.44001	-0.620272	0.296503	-0.288339	0.0127933	-0.190588	1.02167	-0.0141346	0.999601	O95365	Zinc finger and BTB domain-containing protein 7A	ZBTB7A	QMMSSVGRAGAAAGDSDEESRADDKGVMDYY	337
-1.17113	0.615362	-0.604108	0.982967	-1.44152	1.15822	-1.15968	1.44288	-0.908088	0.910299	-0.941455	1.32802	0.81698	O95365	Zinc finger and BTB domain-containing protein 7A	ZBTB7A	SPGATATPGAPAQPSSPDARRNGQEKHFKDE	526
-0.367763	0.365989	-0.652346	0.610498	-0.373868	0.366718	-0.713326	0.781498	-0.331682	0.333894	-0.370535	0.412129	1	O95391	Pre-mRNA-splicing factor SLU7	SLU7	LQEELASGKLVEQANSPKHQWGEEEPNSQME	215
-0.458376	0.326057	-0.314803	0.431062	-0.308532	0.301382	-0.304851	0.573876	-0.598231	0.139957	-0.136404	0.230772	0.996908	O95400	CD2 antigen cytoplasmic tail-binding protein 2	CD2BP2	ARGGGKGRKGPGQPSSPQRLDRLSGLADQMV	195
0.25098	-0.244622	0.255876	-1.75631	0.280507	-0.0689177	0.0674531	-1.68981	0.450359	-0.266703	0.270256	-2.1045	1	O95425	Supervillin	SVIL	SATDYKFSSSIENSDSPVRSILKSQAWQPLV	920
0.588898	-0.43255	0.443804	-0.665526	0.590328	-0.329183	0.327719	-0.63186	0.452678	-0.450466	0.487826	-0.660425	0.999941	O95429	BAG family molecular chaperone regulator 4	BAG4	SYSTEVPSTYRSSGNSPTPVSRWIYPQQDCQ	179
-0.328102	0.510185	-0.272207	0.264122	-0.390814	0.383664	-0.451316	0.433156	-0.320029	0.274917	-0.271364	0.384946	0.999978	O95453	Poly(A)-specific ribonuclease PARN	PARN	GRKKAKKLKRMKKELSPAGSISKNSPATLFE	619
-1.45872	-0.403642	0.594511	0.404201	-0.767175	-0.322709	1.09196	0.315637	-1.12038	-0.126288	0.605326	0.130769	0.991312	O95453	Poly(A)-specific ribonuclease PARN	PARN	QCIPYTLQNHYYRNNSFTAPSTVGKRNLSPS	557
-0.00786215	0.295951	-0.00255637	-0.373747	-0.0781236	0.854275	0.0862095	-0.323151	-0.152444	0.532957	0.150174	-0.325426	0.999958	O95453	Poly(A)-specific ribonuclease PARN	PARN	EKRSQANGAGALSYVSPNTSKCPVTIPEDQK	163
-0.459877	0.550136	-0.927084	0.438764	-0.361764	0.529971	-0.785319	0.364243	-0.245706	0.674285	-0.814944	0.244365	1	O95613	Pericentrin	PCNT	QGKAPRPGPRARQPQSPPRTRESPPTRDVPS	3242
-0.220229	0.218454	-0.403968	0.297066	-0.243453	0.277887	-0.116223	0.124388	-0.337389	-0.0602554	0.0638085	0.156587	1	O95625	Zinc finger and BTB domain-containing protein 11	ZBTB11	VAEAIQTVKVEVAHISGGE____________	1050
0.247326	0.377308	-0.257744	-0.997023	0.198681	0.362456	-0.190595	-0.53865	0.458521	0.106483	-0.102929	-0.764985	0.99155	O95639	Cleavage and polyadenylation specificity factor subunit 4	CPSF4	LQRSSSLIQLTSQNSSPNQQRTPQVIGVMQS	212
1.16118	-1.08933	1.10059	-1.55861	0.921564	-0.928713	1.03625	-1.44897	1.08204	-1.07983	1.17679	-1.54241	0.931873	O95639	Cleavage and polyadenylation specificity factor subunit 4	CPSF4	QRTPQVIGVMQSQNSSAGNRGPRPLEQVTCY	231
-0.39227	0.388826	-0.377572	0.551631	-0.224038	0.216888	-0.218742	0.573976	-0.544149	0.297912	-0.294359	0.329168	0.99972	O95677	Eyes absent homolog 4	EYA4	SSGSKSRGRGRKNNPSPPPDSDLERVFVWDL	361
0.776919	-0.49775	0.509004	-0.598655	0.419954	-0.145042	0.143578	-0.270786	0.0933595	-0.0911478	-0.125027	0.17632	1	O95747	Serine/threonine-protein kinase OSR1	OXSR1	DEESEEGKAAISQLRSPRVKESISNSELFPT	359
1.99704	-1.32426	1.33552	-1.99569	1.95588	-0.827304	0.82584	-1.57241	1.98967	-0.990474	0.994027	-1.08076	0.999861	O95747	Serine/threonine-protein kinase OSR1	OXSR1	TISERAKKVRRVPGSSGRLHKTEDGGWEWSD	325
-0.192567	0.190793	-0.297021	0.761707	-0.00697216	-0.000177771	-0.19009	0.488529	-0.0477906	0.0500023	-0.708648	0.526492	0.999633	O95747	Serine/threonine-protein kinase OSR1	OXSR1	AEPAKTAQALSSGSGSQETKIPISLVLRLRN	427
0.148725	-0.138182	0.149436	-0.965584	-0.00302698	-0.00412296	0.166447	-0.434028	0.319403	-0.0402324	0.0437854	-0.95122	0.996301	O95758	Polypyrimidine tract-binding protein 3	PTBP3	NGNDSKKFKRDRPPCSPSRVLHLRKIPCDVT	56
0.915463	-1.0827	1.2199	-0.936576	1.35008	-1.35723	1.5103	-2.11615	1.03624	-1.03403	1.33177	-1.09448	0.977929	O95817	BAG family molecular chaperone regulator 3	BAG3	NDPRVPSEGPKETPSSANGPSREGSRLPPAR	65
0.458147	-0.439446	0.267703	-0.275788	0.0430199	-0.0501698	0.283619	-0.126245	0.169526	-0.1375	0.141053	-0.650646	0.995651	O95817	BAG family molecular chaperone regulator 3	BAG3	AAAQPPASHGPERSQSPAASDCSSSSSSASL	173
-1.90552	1.48459	-1.47333	1.96603	-2.03406	1.63792	-1.63939	1.83609	-0.557414	0.515192	-0.511639	0.716341	0.993495	O95817	BAG family molecular chaperone regulator 3	BAG3	LRAASPFRSSVQGASSREGSPARSSTPLHSP	275
0.771005	-0.660504	0.671758	-1.29968	0.667399	-0.535193	0.533729	-1.30562	0.771764	-0.765795	0.565762	-0.565762	1	O95819	Mitogen-activated protein kinase kinase kinase kinase 4	MAP4K4	PVRTTSRSPVLSRRDSPLQGSGQQNSQAGQR	639
-0.181729	0.179955	-0.201793	0.395136	-0.146115	0.138965	-0.196379	0.300015	0.053397	-0.0511852	-0.126463	0.342894	0.97762	O95819	Mitogen-activated protein kinase kinase kinase kinase 4	MAP4K4	QRPAEPQVPVRTTSRSPVLSRRDSPLQGSGQ	631
-0.0321851	-0.145339	0.0217666	0.160537	0.0529908	0.0866406	-0.0449048	-0.0913316	-0.0605792	0.172423	-0.088103	0.0592379	0.998891	O95835	Serine/threonine-protein kinase LATS1	LATS1	HEIPTWQPNIPVRSNSFNNPLGNRASHSANS	464
-0.375687	0.0625203	-0.0512663	0.473346	-0.660082	0.082255	-0.0837196	0.739809	-0.310142	0.0208853	-0.0173322	0.486093	0.996815	O95999	B-cell lymphoma/leukemia 10	BCL10	EPFPDGATNNLSRSNSDESNFSEKLRASTVM	138
0.662391	-0.664165	0.899496	-0.930697	0.0236696	-0.314257	0.262104	-0.0211906	-0.0587696	0.020216	0.172048	-0.0157348	1	O96013	Serine/threonine-protein kinase PAK 4	PAK4	GSRGRFAGHSEAGGGSGDRRRAGPEKRPKSS	148
-0.347685	0.213171	-0.201917	0.421059	-0.32306	0.31591	-0.359038	0.734319	-0.438813	0.249737	-0.246184	0.432216	1	O96013	Serine/threonine-protein kinase PAK 4	PAK4	FENMSVTRSNSLRRDSPPPPARARQENGMPE	104
-0.782308	0.780534	-1.10831	2.63365	-0.69092	0.68377	-0.973267	2.8137	-0.363538	0.365749	-1.03333	2.53468	0.998416	O96020	G1/S-specific cyclin-E2	CCNE2	SRLQAKQQPQPSQTESPQEAQIIQAKKRKTT	21
-0.653398	0.484512	-0.473258	0.572888	-0.546202	0.450119	-0.451584	0.757068	-0.620896	0.384271	-0.380718	0.52007	1	O96028	Histone-lysine N-methyltransferase NSD2	WHSC1	TPQKTAEADPRRGVGSPPGRKKTTVSMPRSR	437
0.444807	-0.983255	0.651307	-0.46592	0.0254868	-0.50952	0.27306	-0.0230079	-0.00801419	-0.289534	0.127423	0.00667288	0.880475	P02545	Prelamin-A/C;Lamin-A/C	LMNA	ASGSGAQVGGPISSGSSASSVTVTRSYRSVG	615
-1.02977	0.525166	-0.513912	1.45535	-0.683448	0.591331	-0.592796	1.71487	-1.23237	0.566387	-0.562834	1.65368	0.948348	P02545	Prelamin-A/C;Lamin-A/C	LMNA	PSPTSQRSRGRASSHSSQTQGGGSVTKKRKL	406
-1.99253	1.27374	-1.26248	2.33842	-1.15025	0.894306	-0.895771	1.92297	-0.784674	0.622029	-0.618476	1.56257	0.972748	P02545	Prelamin-A/C;Lamin-A/C	LMNA	SPTSQRSRGRASSHSSQTQGGGSVTKKRKLE	407
0.682934	-0.279271	0.290525	-2.08587	0.683114	-0.0778788	0.0764142	-0.40794	0.65355	-0.106135	0.109688	-0.489375	0.998729	P02545	Prelamin-A/C;Lamin-A/C	LMNA	RGRASSHSSQTQGGGSVTKKRKLESTESRSS	414
0.119821	-0.315682	0.499527	-0.140935	0.134591	-0.302834	0.531878	-0.132112	0.159001	-0.27638	0.596601	-0.160342	1	P02545	Prelamin-A/C;Lamin-A/C	LMNA	ELEKTYSAKLDNARQSAERNSNLVGAAHEEL	277
-0.278524	0.27675	-0.308586	0.490676	-0.702856	0.695706	-0.755501	1.20669	-0.542636	0.544848	-0.546733	0.889787	0.999991	P02545	Prelamin-A/C;Lamin-A/C	LMNA	AYRKLLEGEEERLRLSPSPTSQRSRGRASSH	390
-0.592233	1.31879	-1.04953	0.571119	-0.45596	0.998115	-0.446787	0.454952	-0.806671	1.30711	-1.20742	0.805329	1	P02545	Prelamin-A/C;Lamin-A/C	LMNA	RKLLEGEEERLRLSPSPTSQRSRGRASSHSS	392
-0.472211	1.39192	-0.291847	0.283762	-0.106026	1.25229	-0.397083	0.108505	0.0766181	1.63893	-0.103387	-0.0779595	0.999959	P02545	Prelamin-A/C;Lamin-A/C	LMNA	RRATRSGAQASSTPLSPTRITRLQEKEDLQE	22
0.871154	-0.473391	0.484645	-1.68036	0.851428	-0.343123	0.341658	-1.75789	0.871097	-0.493361	0.496915	-1.56037	0.998877	P02545	Prelamin-A/C;Lamin-A/C	LMNA	FGDNLVTRSYLLGNSSPRTQSPQNCSIM___	652
-0.417103	0.415329	-0.460701	0.453655	-0.276466	0.269316	-0.316964	0.382365	-0.253025	0.555217	-0.413822	0.251684	0.999966	P02794	Ferritin heavy chain;Ferritin heavy chain, N-terminally processed	FTH1	SGLAEYLFDKHTLGDSDNES___________	179
1.80299	-1.57039	1.58165	-3.16407	1.29616	-0.800931	0.799466	-2.3771	1.58017	-0.845797	0.84935	-1.98755	1	P04183	Thymidine kinase, cytosolic	TK1	VAARKLFAPQQILQCSPAN____________	231
0.0436655	-0.0151239	0.0138136	-0.0218989	-0.05164	-0.0661656	0.310447	0.0541189	0.402799	-0.00591114	-0.277595	0.0103924	0.984807	P04183	Thymidine kinase, cytosolic	TK1	___MSCINLPTVLPGSPSKTRGQIQVILGPM	13
-0.234787	1.36898	-2.1936	0.213674	-0.406478	1.64051	-1.88351	0.408957	0.556014	-0.325861	0.329414	-1.43437	0.984182	P04637	Cellular tumor antigen p53	TP53	PPGSTKRALPNNTSSSPQPKKKPLDGEYFTL	315
-1.09937	0.211875	-0.200621	1.00328	-0.588284	0.0130566	-0.0145212	0.731195	-0.710555	0.390518	-0.386965	0.791609	0.958519	P04792	Heat shock protein beta-1	HSPB1	AVAAPAYSRALSRQLSSGVSEIRHTADRWRV	82
-0.44595	0.444176	-0.547359	0.745284	-0.403434	0.396284	-0.526853	0.675737	-0.401825	0.404037	-0.499903	0.582868	1	P05114	Non-histone chromosomal protein HMG-14	HMGN1	EESPASDEAGEKEAKSD______________	99
-0.445139	0.914821	-0.383786	0.375701	0.219721	-0.525547	-0.0828546	0.0910189	0.0173156	-0.0151039	-0.330414	0.414276	1	P05386	60S acidic ribosomal protein P1	RPLP1	AEEKKVEAKKEESEESDDDMGFGLFD_____	104
-0.445139	0.914821	-0.383786	0.375701	0.219721	-0.525547	-0.0828546	0.0910189	0.0173156	-0.0151039	-0.330414	0.414276	1	P05387	60S acidic ribosomal protein P2	RPLP2	AAEEKKDEKKEESEESDDDMGFGLFD_____	105
0.587542	-0.61531	0.834393	-0.608656	1.44684	-1.45399	1.58958	-2.50683	0.580291	-0.570573	0.574126	-1.11701	0.998616	P05387	60S acidic ribosomal protein P2	RPLP2	SVPAGGAVAVSAAPGSAAPAAGSAPAAAEEK	79
1.52856	-1.53033	1.90983	-2.53651	0.604317	-0.611467	0.99236	-0.690969	0.851912	-0.8497	1.26142	-1.09834	1	P05455	Lupus La protein	SSB	RFKGKGKGNKAAQPGSGKGKVQFQGKKTKFA	350
-0.326249	0.0728784	-0.0616243	0.272114	-0.519231	0.387502	-0.388966	0.609549	-0.211371	0.208174	-0.204621	0.282147	1	P05455	Lupus La protein	SSB	GKGKVQFQGKKTKFASDDEHDEHDENGATGP	366
0.0728334	-1.19825	0.649059	-0.0939468	2.42688	-1.06545	1.06399	-1.0944	-0.128087	0.130299	0.366156	-1.55777	0.967246	P05783	Keratin, type I cytoskeletal 18	KRT18	LGSVQAPSYGARPVSSAASVYAGAGGSGSRI	31
0.836362	-1.96461	0.89448	-0.857475	2.31429	-1.00479	1.00333	-1.2698	0.522777	-0.520566	0.579158	-0.74476	0.999941	P05783	Keratin, type I cytoskeletal 18	KRT18	VQAPSYGARPVSSAASVYAGAGGSGSRISVS	34
0.572804	-0.577734	1.05755	-0.593918	0.365843	-0.406468	1.11941	-0.363364	0.771729	-0.769517	1.40743	-0.968852	0.999687	P05783	Keratin, type I cytoskeletal 18	KRT18	RPVSSAASVYAGAGGSGSRISVSRSTSFRGG	42
1.29015	-2.22085	1.78094	-1.31127	0.924876	-0.932026	1.11809	-1.24196	0.810147	-0.807935	1.19429	-1.04462	0.99931	P05783	Keratin, type I cytoskeletal 18	KRT18	_MSFTTRSTFSTNYRSLGSVQAPSYGARPVS	15
1.15285	-1.89859	1.53309	-1.17396	1.92856	-1.19804	1.19657	-1.43221	0.784609	-0.782397	0.928977	-0.975567	0.999982	P05783	Keratin, type I cytoskeletal 18	KRT18	FTTRSTFSTNYRSLGSVQAPSYGARPVSSAA	18
0.975913	-1.61834	1.00388	-0.997026	1.54933	-0.946199	0.944734	-1.03361	0.673205	-0.670993	0.840398	-1.10323	0.992692	P05783	Keratin, type I cytoskeletal 18	KRT18	_________MSFTTRSTFSTNYRSLGSVQAP	7
-0.309022	0.0175415	-0.00628745	0.741413	-0.48616	0.132515	-0.13398	0.565751	-0.593121	0.257412	-0.253859	0.403367	1	P06241	Tyrosine-protein kinase Fyn	FYN	CKDKEATKLTEERDGSLNQSSGYRYGTDPTP	21
-0.387127	1.3474	-0.455498	0.366013	-0.44382	1.38705	-0.503859	0.446299	-0.373129	0.959998	-0.442214	0.371788	1	P06400	Retinoblastoma-associated protein	RB1	LLKEPYKTAVIPINGSPRTPRRGQNRSARIA	249
-1.5849	0.403495	-0.392241	0.493178	-1.43682	-0.013912	0.0124473	0.333281	-0.701903	0.594186	-0.590633	0.707431	0.999993	P06454	Prothymosin alpha;Prothymosin alpha, N-terminally processed;Thymosin alpha-1	PTMA	______________MSDAAVDTSSEITTKDL	2
-0.616215	-1.08937	3.73382	0.595101	-1.3277	-0.303786	1.36614	0.296714	-0.789945	-0.708944	2.96262	0.713425	0.875996	P06454	Prothymosin alpha;Prothymosin alpha, N-terminally processed;Thymosin alpha-1	PTMA	_______MSDAAVDTSSEITTKDLKEKKEVV	9
-0.229977	0.200363	0.109836	-0.117921	0.635656	-0.642806	1.28248	-1.07393	0.455905	-0.453694	0.991048	-0.632717	0.984706	P06748	Nucleophosmin	NPM1	FKKQEKTPKTPKGPSSVEDIKAKMQASIEKG	243
1.89501	-1.87869	1.88995	-4.89684	1.59893	-1.60608	1.61357	-4.65817	1.60577	-1.60356	1.61808	-2.79682	1	P06748	Nucleophosmin	NPM1	KGPSSVEDIKAKMQASIEKGGSLPKVEAKFI	254
1.08252	-1.07657	1.08783	-2.37677	1.25805	-1.2652	1.58676	-2.60565	0.807447	-0.805235	1.27781	-0.922381	1	P06748	Nucleophosmin	NPM1	EEEEDVKLLSISGKRSAPGGGSKVPQKKVKL	143
-0.235844	-0.0282134	0.0394675	0.935329	-0.329413	0.0166905	-0.0181551	0.714016	-0.309121	-0.0267843	0.0303374	0.104252	0.858156	P06756	Integrin alpha-V;Integrin alpha-V heavy chain;Integrin alpha-V light chain	ITGAV	QEREQLQPHENGEGNSET_____________	1046
0.0593328	-0.0611069	0.0905619	-0.521504	0.153547	-0.160697	0.248342	-0.159358	0.0924736	-0.167429	-0.094743	0.414159	0.804891	P07814	Bifunctional glutamate/proline--tRNA ligase;Glutamate--tRNA ligase;Proline--tRNA ligase	EPRS	EYIPGQPPLSQSSDSSPTRNSEPAGLETPEA	886
-0.0697055	-0.319483	1.07333	0.048592	0.100914	-0.862949	1.11942	-0.0984349	0.148836	-0.415644	1.15464	-0.150178	0.995208	P07814	Bifunctional glutamate/proline--tRNA ligase;Glutamate--tRNA ligase;Proline--tRNA ligase	EPRS	QRKDPSKNQGGGLSSSGAGEGQGPKKQTRLG	1000
-0.347806	0.481923	-0.417938	0.326692	-0.00732771	0.000177771	-0.25228	0.262481	-0.00750317	0.00971494	-0.592273	0.374321	1	P07900	Heat shock protein HSP 90-alpha	HSP90AA1	YPITLFVEKERDKEVSDDEAEEKEDKEEEKE	231
-0.147053	0.55672	-0.451774	0.12594	0.00761277	-0.206329	0.0474053	-0.0051338	-0.0013821	0.00359387	-0.888109	0.489815	1	P07900	Heat shock protein HSP 90-alpha	HSP90AA1	EEKESEDKPEIEDVGSDEEEEKKDGDKKKKK	263
-0.645196	0.643422	-0.646808	0.843841	-0.228852	0.221703	-0.492833	0.625781	-0.525208	0.52742	-0.67613	0.931614	0.999997	P07910	Heterogeneous nuclear ribonucleoproteins C1/C2	HNRNPC	KDDEKEAEEGEDDRDSANGEDDS________	299
-0.4275	0.425726	-0.625454	0.799888	-0.627134	0.619984	-0.696963	0.754365	-0.384999	0.387211	-0.696856	1.15218	0.999556	P07910	Heterogeneous nuclear ribonucleoproteins C1/C2	HNRNPC	EEGEDDRDSANGEDDS_______________	306
-0.233481	0.231707	-0.590033	0.242324	-0.259638	0.252488	-0.393583	0.4984	-0.269439	0.271651	-0.344114	0.318383	1	P07910	Heterogeneous nuclear ribonucleoproteins C1/C2	HNRNPC	EKEQSKQAVEMKNDKSEEEQSSSSVKKDETN	233
0.258514	-0.276383	1.08639	-0.279627	0.369953	-0.604914	0.891405	-0.367474	-0.496914	-0.0851287	0.0967725	0.0896099	0.875437	P07910	Heterogeneous nuclear ribonucleoproteins C1/C2	HNRNPC	AVEMKNDKSEEEQSSSSVKKDETNVKMESEG	240
0.961709	-0.963484	1.44532	-1.22293	0.6718	-0.67895	1.1549	-0.829455	0.751209	-0.748997	1.2009	-1.00666	1	P08047	Transcription factor Sp1	SP1	EACTCPYCKDSEGRGSGDPGKKKQHICHIQG	617
-0.0563127	0.0545386	-0.351275	0.300665	-0.393447	-0.529112	0.401533	0.75891	-0.111199	-0.507474	0.108929	0.308126	0.998177	P08047	Transcription factor Sp1	SP1	GSSSSTGGGGQESQPSPLALLAATCSRIESP	59
-0.0634071	0.061633	-0.440496	0.550326	-0.0465843	0.0394344	-0.871838	0.211555	0.136894	-0.134682	-0.514492	0.465821	1	P08238	Heat shock protein HSP 90-beta;Putative heat shock protein HSP 90-beta-3	HSP90AB1;HSP90AB3P	YPITLYLEKEREKEISDDEAEEEKGEKEEED	226
-0.206042	0.204268	-0.218894	0.255676	-0.495354	0.182589	-0.184053	0.610207	-0.0626258	0.0648375	-0.356686	0.372005	1	P08238	Heat shock protein HSP 90-beta;Putative heat shock protein HSP 90-beta 2	HSP90AB1;HSP90AB2P	EDKDDEEKPKIEDVGSDEEDDSGKDKKKKTK;ENKDDEEKPKIEDVGSDEEDDSGKDKKKKTK	255
0.122252	-0.126222	0.0591801	-0.0672654	0.0165368	-0.11219	-0.00845079	0.0741182	-0.00165	-0.188173	-0.000619455	0.0558134	1	P08621	U1 small nuclear ribonucleoprotein 70 kDa	SNRNP70	SGRDDTSRYDERPGPSPLPHRDRDRDRERER	226
-1.65745	1.65568	-1.70511	2.04221	-1.68987	1.68272	-1.68902	2.59046	-1.83212	1.83433	-1.8373	2.23542	0.904522	P08651	Nuclear factor 1 C-type	NFIC	DVDTSPGGDYYTSPSSPTSSSRNWTEDMEGG	305
-1.90794	1.55647	-1.54522	1.81709	-2.42356	1.73499	-1.73645	2.63521	-2.11279	1.41181	-1.40826	1.51263	0.999843	P08651	Nuclear factor 1 C-type	NFIC	PVKKTEMDKSPFNSPSPQDSPRLSSFTQHHR	339
0.921038	-0.81792	0.829174	-1.82792	0.297047	-0.304197	0.49928	-0.425096	0.597407	-0.595195	0.655434	-1.48678	0.840186	P08651	Nuclear factor 1 C-type	NFIC	NPASTGLRRTLPSTSSSGSKRHKSGSMEEDV	276
-0.287197	-0.469457	3.84875	0.266083	-0.626228	-0.240134	3.55214	0.233062	-0.23333	-0.320002	1.57956	0.231988	0.948101	P08670	Vimentin	VIM	IKTVETRDGQVINETSQHHDDLE________	459
1.2711	-1.64456	1.85988	-1.29222	0.91718	-1.07399	1.10839	-0.914701	0.412461	-0.799573	0.768832	-0.413802	0.930009	P08670	Vimentin	VIM	SYRRMFGGPGTASRPSSSRSYVTTSTRTYSL	25
-0.294178	0.292404	-0.398968	0.769033	-0.257232	0.433478	-0.639688	0.259711	-0.299039	0.561357	-0.378539	0.297698	1	P08670	Vimentin	VIM	AENTLQSFRQDVDNASLARLDLERKVESLQE	214
1.47721	-1.44332	1.45458	-4.01321	1.26688	-1.18704	1.18557	-4.01934	1.26793	-1.26572	1.3207	-2.45836	0.974919	P08670	Vimentin	VIM	GSALRPSTSRSLYASSPGGVYATRSSAVRLR	56
0.65629	-0.77891	0.250192	-0.258277	1.12374	-0.346945	0.34548	-0.48866	0.32434	-0.178428	0.181981	-0.268501	0.999851	P08670	Vimentin	VIM	___________MSTRSVSSSSYRRMFGGPGT	5
1.09804	-0.896762	0.908016	-0.992961	0.844819	-0.631735	0.63027	-1.27724	0.529309	-0.516535	0.520088	-1.03314	0.997896	P08670	Vimentin	VIM	______MSTRSVSSSSYRRMFGGPGTASRPS	10
1.37677	-1.16759	0.951446	-0.959532	1.45568	-0.719158	0.717694	-1.29837	0.89762	-0.527118	0.530671	-0.942947	0.99712	P08670	Vimentin	VIM	GTASRPSSSRSYVTTSTRTYSLGSALRPSTS	34
-0.305127	0.15707	-0.145816	0.457396	-0.229892	0.141558	-0.143023	0.54169	-0.0329892	0.033536	-0.029983	0.479243	0.996452	P09601	Heme oxygenase 1	HMOX1	FEELQELLTHDTKDQSPSRAPGLRQRASNKV	229
-0.735058	-0.865041	0.724639	0.738308	-0.566817	-0.821726	0.574903	0.917628	-0.649086	-0.689549	0.646816	0.731058	0.999921	P09651	Heterogeneous nuclear ribonucleoprotein A1;Heterogeneous nuclear ribonucleoprotein A1, N-terminally processed	HNRNPA1	QEMASASSSQRGRSGSGNFGGGRGGGFGGND	199
0.99218	-0.993954	1.30827	-1.62301	0.463961	-0.471111	0.926733	-1.4709	1.43127	-1.42906	1.95931	-1.44108	1	P09651	Heterogeneous nuclear ribonucleoprotein A1;Heterogeneous nuclear ribonucleoprotein A1, N-terminally processed	HNRNPA1	NQGGYGGSSSSSSYGSGRRF___________	368
-0.626417	0.0956196	-0.0843655	0.509128	-0.77171	0.0206026	-0.0220672	0.500048	-0.592723	0.0903707	-0.0868177	0.433983	0.998819	P09651	Heterogeneous nuclear ribonucleoprotein A1;Heterogeneous nuclear ribonucleoprotein A1, N-terminally processed	HNRNPA1	__________MSKSESPKEPEQLRKLFIGGL	6
0.643085	-0.644859	1.38099	-1.04322	1.1422	-1.14935	1.97964	-2.04232	0.873897	-0.871685	2.02157	-0.934507	0.880179	P09651	Heterogeneous nuclear ribonucleoprotein A1;Heterogeneous nuclear ribonucleoprotein A1, N-terminally processed	HNRNPA1	SSNFGPMKGGNFGGRSSGPYGGGGQYFAKPR	337
0.912019	-0.93326	1.57535	-0.933132	1.03217	-1.03932	1.56719	-1.34845	1.10399	-1.10178	2.02715	-1.47172	0.902418	P09651	Heterogeneous nuclear ribonucleoprotein A1;Heterogeneous nuclear ribonucleoprotein A1, N-terminally processed	HNRNPA1	SNFGPMKGGNFGGRSSGPYGGGGQYFAKPRN	338
-0.0715044	-0.0645888	0.529113	0.050391	0.111269	-0.131566	0.260973	-0.108791	0.350304	-0.348092	0.421267	-0.366156	0.998355	P0DMV9	Heat shock 70 kDa protein 1B;Heat shock 70 kDa protein 1A	HSPA1B;HSPA1A	GPGPGGFGAQGPKGGSGSGPTIEEVD_____	631
0.284768	-0.286542	0.327182	-0.465966	0.143585	-0.150735	0.510154	-0.148877	0.328829	-0.263286	0.266839	-0.68975	0.985649	P0DMV9	Heat shock 70 kDa protein 1B;Heat shock 70 kDa protein 1A	HSPA1B;HSPA1A	GPGGFGAQGPKGGSGSGPTIEEVD_______	633
-0.510065	0.417271	-0.327834	0.319749	0.0918263	-0.0989762	-0.242693	0.253546	-0.144059	0.314901	-0.141763	0.141763	0.999979	P10398	Serine/threonine-protein kinase A-Raf	ARAF	DAAGSRGGSDGTPRGSPSPASVSSGRKSPHS	257
-0.350477	0.192693	-0.181439	0.529375	-0.431879	0.093242	-0.0947066	0.645191	-0.349352	0.177575	-0.174022	0.566156	0.999592	P10644	cAMP-dependent protein kinase type I-alpha regulatory subunit;cAMP-dependent protein kinase type I-alpha regulatory subunit, N-terminally processed	PRKAR1A	LQKAGTRTDSREDEISPPPPNPVVKGRRRRG	83
-0.237134	0.23536	-0.310488	0.419983	-0.25434	0.368436	-0.438164	0.256819	-0.206641	0.379685	-0.281266	0.205299	1	P11142	Heat shock cognate 71 kDa protein	HSPA8	NHFIAEFKRKHKKDISENKRAVRRLRTACER	254
-1.1321	0.343338	-0.332083	0.819156	-1.08763	0.530587	-0.45964	0.467804	-0.730226	0.304107	-0.287632	0.287632	0.978871	P11274	Breakpoint cluster region protein	BCR	GMMEGEGKGPLLRSQSTSEQEKRLTWPRRSY	301
1.72931	-1.586	1.59725	-3.18327	1.01547	-0.92033	0.918866	-1.17341	0.699461	-0.80992	0.751348	-0.700802	1	P11387	DNA topoisomerase 1	TOP1	KDRDKEKRKEEKVRASGDAKIKKEKENGFSS	97
-0.240744	0.629639	-0.168293	0.160208	-0.21222	0.2857	-0.578772	0.214699	-0.190009	0.192221	-0.481158	0.325571	1	P11388	DNA topoisomerase 2-alpha	TOP2A	KEAQQKVPDEEENEESDNEKETEKSDSVTDS	1106
0.307051	-0.450176	0.478537	-0.328164	0.418677	-0.425827	0.695249	-0.84342	-0.0616746	-0.60468	0.166507	0.0603333	1	P11388	DNA topoisomerase 2-alpha	TOP2A	EKKNKKKIKNENTEGSPQEDGVELEGLKQRL	1247
0.661419	-0.583406	0.59466	-1.7206	0.555817	-0.516086	0.514621	-1.24376	0.57581	-0.547396	0.550949	-1.63652	1	P11388	DNA topoisomerase 2-alpha	TOP2A	____________MEVSPLQPVNENMQVNKIK	4
0.0849722	-0.0765169	0.087771	-2.13701	0.109903	-0.00252773	0.00106313	-2.19304	0.187519	-0.0552917	0.0588448	-1.81143	1	P11388	DNA topoisomerase 2-alpha	TOP2A	GKAKGKKTQMAEVLPSPRGQRVIPRITIEMK	1213
0.213835	0.124962	-0.113708	-1.36136	0.122566	0.00521037	-0.00667497	-1.32232	0.146808	-0.0321929	0.0357459	-0.531148	0.962029	P11532	Dystrophin	DMD	EQPQAEAKVNGTTVSSPSTSLQRSDSSQPML	3613
0.0265677	-0.0283418	-0.437832	0.271923	0.153	-0.16015	-0.492251	0.83538	0.326032	-0.185157	-0.370678	0.189638	0.999633	P12270	Nucleoprotein TPR	TPR	MGGGEGNHRAADSQNSGEGNTGAAESSFSQE	2037
-0.370626	-0.190487	2.21195	0.191046	-0.549898	0.0231415	2.19167	-0.0302131	-0.936305	-0.48727	1.59019	0.491751	0.966579	P12270	Nucleoprotein TPR	TPR	DSQNSGEGNTGAAESSFSQEVSREQQPSSAS	2048
0.239357	-0.41957	0.052818	-0.0609032	0.557075	-0.200721	0.199257	-0.500321	-0.0119141	0.0141259	-0.0997997	0.35368	1	P12270	Nucleoprotein TPR	TPR	LVVPHRTDGFAEAIHSPQVAGVPRFRFGPPE	2155
0.755342	-0.757116	1.14142	-1.03518	0.692809	-0.699959	0.865956	-0.985957	0.564765	-0.64936	0.944837	-0.566107	0.999991	P12956	X-ray repair cross-complementing protein 6	XRCC6	NPEGKVTKRKHDNEGSGSKRPKVEYSEEELK	550
0.349425	-0.3512	0.908349	-0.536847	0.594665	-0.601815	1.54821	-0.837234	0.744825	-0.742614	1.38832	-0.845541	0.990813	P13639	Elongation factor 2	EEF2	RYFDPANGKFSKSATSPEGKKLPRTFCQLIL	279
-0.594614	0.59284	-0.645023	1.31855	-0.609246	0.418729	-0.420194	0.888379	-0.79932	0.639042	-0.50883	0.50883	0.999997	P13807	Glycogen [starch] synthase, muscle	GYS1	KDRRNIRAPEWPRRASCTSSTSGSKRNSVDT	698
-0.466753	0.464979	-0.455487	0.570299	-0.365942	0.358792	-0.513453	0.626636	-0.197897	0.200109	-0.354597	0.322866	1	P13984	General transcription factor IIF subunit 2	GTF2F2	WELKPEYRHYQGEEKSD______________	248
-0.467418	0.507043	-0.610809	0.446305	-0.330397	0.323247	-0.539722	0.388786	-0.400603	0.56398	-0.459002	0.399262	0.980372	P14859	POU domain, class 2, transcription factor 1	POU2F1	KEKRINPPSSGGTSSSPIKAIFPSPTSLVAT	448
0.438546	-0.837402	0.646982	-0.45966	0.496149	-0.680521	0.611084	-0.49367	0.551608	-0.549396	0.770832	-0.618659	1	P14866	Heterogeneous nuclear ribonucleoprotein L	HNRNPL	AAGGGGGGGRYYGGGSEGGRAPKRLKTDNAG	52
-0.96839	0.593782	-0.582528	0.857819	-0.776031	0.342476	-0.343941	1.08379	-1.02822	0.62174	-0.618187	0.781498	0.979267	P15056	Serine/threonine-protein kinase B-raf	BRAF	KALQKSPGPQRERKSSSSSEDRNRMKTLGRR	429
-0.086304	0.0845299	-0.223521	0.695163	-0.150932	0.143782	-0.222517	0.468671	-0.185722	0.187933	-0.192697	0.439246	0.968447	P15056	Serine/threonine-protein kinase B-raf	BRAF	LARSLPKIHRSASEPSLNRAGFQTEDFSLYA	732
0.613925	-0.615699	1.17952	-0.930983	0.482683	-0.523835	1.18108	-0.480204	0.544447	-0.64354	0.998326	-0.545788	0.982749	P15408	Fos-related antigen 2	FOSL2	SVGAVVVKQEPLEEDSPSSSSAGLDKAQRSV	230
-0.150832	0.149058	-0.181025	0.422536	-0.454357	0.260159	-0.261624	0.72213	-0.0970045	0.0992162	-0.509711	0.176999	1	P15822	Zinc finger protein 40	HIVEP1	SESLPITQKISVGRLSPQQESSASSKRMLSP	1735
-0.100868	-0.309453	0.0904497	0.0969056	-0.151614	-0.549101	0.1597	0.35467	-0.0437474	-0.954604	0.312685	0.0424061	0.995845	P15822	Zinc finger protein 40	HIVEP1	KQTSVASANQVSRTESPQGLPTVQRENAKKV	2599
0.241707	-0.501443	-0.0579897	0.0499044	-0.150781	0.143631	-0.443627	0.804688	0.009937	-0.00772523	-0.467343	0.347474	1	P15924	Desmoplakin	DSP	SHPRINTLGRMIRAESGPDLRYEVTSGGGGT	22
1.46123	-1.32207	1.11609	-1.12418	1.44848	-1.18723	1.18576	-2.37107	0.378496	-0.260779	0.158276	-0.158276	0.971463	P15924	Desmoplakin	DSP	LRLLEAASVSSKGLPSPYNMSSAPGSRSGSR	2815
0.0584365	-0.0602106	0.270676	-0.536281	-0.109932	0.102782	0.186512	-0.521599	-0.254652	-0.0192775	0.0228306	0.667246	1	P16070	CD44 antigen	CD44	NSRRRCGQKKKLVINSGNGAVEDRKPSGLNG	686
0.135494	0.268034	-0.145913	-0.305555	0.238853	0.367059	-0.427109	-0.236374	0.224632	0.325926	-0.226902	-0.247258	1	P16070	CD44 antigen	CD44	VEDRKPSGLNGEASKSQEMVHLVNKESSETP	706
0.420907	0.0655252	-0.0542712	-0.231599	0.0138974	-0.0210474	-0.272925	0.196344	0.683988	-0.272	-0.277633	0.276481	0.999855	P16104	Histone H2AX	H2AFX	VGPKAPSGGKKATQASQEY____________	140
0.0441586	-0.0469703	-0.0545771	0.652963	-0.270563	0.153013	-0.154477	1.12652	0.13832	-0.664523	-0.045144	0.045144	0.911726	P16401	Histone H1.5	HIST1H1B	______________MSETAPAETATPAPVEK	2
-0.964263	0.929106	-0.917852	1.05367	-0.930821	0.923671	-1.14535	1.1814	-0.359579	0.566854	-0.702505	0.358238	1	P16401	Histone H1.5	HIST1H1B	ETAPAETATPAPVEKSPAKKKATKKAAGAGA	18
-0.279448	0.271017	-0.259763	0.559184	-0.371065	0.250919	-0.252384	0.34985	-0.372142	0.374354	-0.414317	0.56135	1	P16615	Sarcoplasmic/endoplasmic reticulum calcium ATPase 2	ATP2A2	TSKAFTGREFDELNPSAQRDACLNARCFARV	663
0.918876	-0.155458	0.166712	-1.97029	0.616936	-0.118116	0.116651	-1.78166	0.4476	-0.355487	0.35904	-2.17476	1	P16949	Stathmin	STMN1	ELEKRASGQAFELILSPRSKESVPEFPLSPP	25
-0.718709	0.499954	-0.4887	0.746675	-0.812171	0.551195	-0.55266	0.933624	-0.737309	0.466001	-0.462448	0.758509	0.984444	P16989	Y-box-binding protein 3	YBX3	PPRNYAGEEEEEGSGSSEGFDPPATDRQFSG	203
-0.171286	0.406415	-0.624281	0.150173	-0.122553	0.349321	-0.703258	0.125032	-0.0214788	0.340062	-0.517272	0.0201375	0.999097	P17029	Zinc finger protein with KRAB and SCAN domains 1	ZKSCAN1	___MMTAESREATGLSPQAAQEKDGIVIVKV	13
-0.622576	0.620802	-0.932806	0.742321	-0.568599	0.561449	-1.00998	1.48012	-0.338783	0.340995	-0.814	1.34182	1	P17096	High mobility group protein HMG-I/HMG-Y	HMGA1	PKKLEKEEEEGISQESSEEEQ__________	102
1.05355	-0.963648	0.88673	-0.894816	1.44145	-1.20002	1.19856	-2.60379	0.972185	-0.714399	0.717952	-1.13719	0.990636	P17096	High mobility group protein HMG-I/HMG-Y	HMGA1	TEKRGRGRPRKQPPVSPGTALVGSQKEPSEV	36
0.910722	-0.649257	-0.268949	0.260863	0.823037	-0.457845	-0.592916	0.450774	1.1039	-0.579366	-0.337012	0.337012	0.875463	P17096	High mobility group protein HMG-I/HMG-Y	HMGA1	________MSESSSKSSQPLASKQEKDGTEK	8
0.759261	-2.01523	0.935485	-0.780374	0.864671	-1.08103	1.13583	-0.862192	-0.0306196	-1.03802	0.0283501	0.165019	1	P17275	Transcription factor jun-B	JUNB	TPTPPGQYFYPRGGGSGGGAGGAGGGVTEEQ	117
0.85568	-0.857455	1.19179	-1.72517	0.824748	-0.831898	1.33216	-2.31714	0.905144	-0.902932	1.35015	-1.97183	0.998311	P17480	Nucleolar transcription factor 1	UBTF	QKQYKVHLDLWVKSLSPQDRAAYKEYISNKR	638
-0.425232	0.491791	-0.477039	0.404118	-0.471035	0.465315	-0.396612	0.404777	-0.37894	0.467361	-0.747401	0.377598	1	P17706	Tyrosine-protein phosphatase non-receptor type 2	PTPN2	WKELSKEDLSPAFDHSPNKIMTEKYNGNRIG	304
-0.625618	0.623844	-0.766728	0.655025	-0.294424	0.287274	-0.444034	0.985011	-0.463597	0.465809	-0.737136	0.604356	0.999083	P17812	CTP synthase 1	CTPS1	RLSPRDTYSDRSGSSSPDSEITELKFPSINH	575
1.23193	-1.21528	1.22653	-2.21247	1.25474	-0.985662	0.984197	-2.87729	1.30474	-1.05048	1.05403	-2.56064	1	P18031	Tyrosine-protein phosphatase non-receptor type 1	PTPN1	RSRVVGGSLRGAQAASPAKGEPSLPEKDEDH	386
0.0332126	-0.0349867	-0.324882	0.43596	-0.402502	0.395352	-0.572399	0.719403	-0.0333877	0.660239	0.0311182	-1.87919	0.993114	P18206	Vinculin	VCL	SKLNQAKGWLRDPSASPGDAGEQAIRQILDE	290
0.757919	-0.759694	1.02591	-1.47165	0.763144	-0.770294	0.786265	-2.64139	-0.060587	0.111701	-0.0998635	0.0592457	0.983466	P18583	Protein SON	SON	TSPVGEIGEEKILPTSETKQRTVLDTYPGVS	1570
1.63674	-1.63851	1.86279	-2.06728	1.07476	-1.08191	1.19478	-1.62745	1.28784	-1.28563	1.44907	-2.16336	0.978838	P19338	Nucleolin	NCL	EVVIPQKKGKKAAATSAKKVVVSPTKKVAVA	60
0.483443	-0.485217	0.634679	-1.18339	0.546624	-0.504045	0.480545	-0.47238	0.508649	-0.717864	0.377883	-0.377883	1	P19338	Nucleolin	NCL	IEGRAIRLELQGPRGSPNARSQPSKTLFVKG	563
-0.427531	0.425757	-0.463549	0.631011	-0.416261	0.381751	-0.383216	0.631134	-0.340836	0.343048	-0.412743	0.573067	0.944018	P19338	Nucleolin	NCL	KGKKAAATSAKKVVVSPTKKVAVATPAKKAA	67
-0.796053	1.43755	-1.0745	0.774939	-0.90935	1.36425	-1.09457	0.911829	-0.499894	1.27033	-1.07402	0.498553	0.992999	P19634	Sodium/hydrogen exchanger 1	SLC9A1	SSPGTDDVFTPAPSDSPSSQRIQRCLSDPGP	785
-1.46513	1.56161	-1.53827	1.44401	-0.723609	0.5278	-0.529265	1.05412	-0.967848	0.988558	-0.982615	0.966506	0.998763	P20020	Plasma membrane calcium-transporting ATPase 1	ATP2B1	DDTDAEDDAPTKRNSSPPPSPNKNNNAVDSG	1178
-0.255876	0.254102	-0.37027	0.409367	-0.342882	0.335733	-0.580468	0.887916	-0.390327	0.392539	-0.680941	0.716628	0.999999	P20042	Eukaryotic translation initiation factor 2 subunit 2	EIF2S2	______________MSGDEMIFDPTMSKKKK	2
-0.270072	0.873571	0.259653	-0.35494	-0.284827	0.277677	0.315306	-0.720882	0.0361853	-0.0339735	0.213758	-0.804347	0.999887	P20700	Lamin-B1	LMNB1	PPRMGSRAGGPTTPLSPTRLSRLQEKEELRE	23
-0.58422	1.80491	-0.823752	0.563107	-0.283608	1.41007	-0.336601	0.286087	-0.568881	1.7205	-0.813199	0.56754	1	P20700	Lamin-B1;Lamin-B2	LMNB1;LMNB2	RKLLEGEEERLKLSPSPSSRVTVSRASSSRS;RKLLEGEEERLKLSPSPSSRVTVSRATSSSS	393
-0.765505	0.756375	-0.745121	1.54543	-0.524202	0.517052	-0.562073	1.62135	-0.671912	0.573797	-0.570244	1.48803	0.999996	P20749	B-cell lymphoma 3 protein	BCL3	RGKATRPASTSQPDPSPDRSANTSPESSSRL	374
0.791545	-0.933628	1.14642	-0.812659	0.784854	-0.792004	1.16268	-0.853105	0.514353	-0.512141	0.781871	-1.04762	1	P20810	Calpastatin	CAST	DTGSNDAHNKKAVSRSAEQQPSEKSTEPKTK	87
-0.0516795	0.431043	-0.0205753	0.01249	-0.0135404	0.482571	-0.143999	0.0160194	0.0401345	0.259613	-0.042404	-0.108725	0.999979	P20962	Parathymosin	PTMS	EDEADPKRQKTENGASA______________	101
-0.282216	-0.00458597	0.0158401	0.633619	0.864534	-0.577074	0.575609	-0.814708	0.262529	-0.260317	0.328003	-0.269511	1	P21291	Cysteine and glycine-rich protein 1	CSRP1	PKGFGFGQGAGALVHSE______________	192
0.578416	-1.03095	0.82148	-0.59953	0.997605	-1.00475	1.48276	-1.18509	0.803905	-0.801693	1.18092	-3.41603	1	P21333	Filamin-A	FLNA	KVKAFGPGLQGGSAGSPARFTIDTKGAGTGG	1084
-0.175239	-0.12763	0.161066	0.12819	-0.435318	0.00982196	-0.0112866	0.0304361	-0.62381	0.0711712	-0.0301646	0.0301646	0.980553	P21359	Neurofibromin;Neurofibromin truncated	NF1	SPTTGHCNSGRTRHGSASQVQKQRSAGSFKR	2817
-0.229953	0.0832771	-0.072023	0.113136	-0.156956	-0.107472	0.161873	0.100401	-0.47738	0.0282851	-0.024732	0.265204	0.992952	P21796	Voltage-dependent anion-selective channel protein 1	VDAC1	DQLARGLKLTFDSSFSPNTGKKNAKIKTGYK	104
-0.646317	0.521303	-0.510049	0.54937	-0.298493	0.291343	-0.39527	0.430298	-0.343382	0.345594	-0.436423	0.396545	0.986587	P22314	Ubiquitin-like modifier-activating enzyme 1	UBA1	____________MSSSPLSKKRRVSGPDPKP	4
1.12262	-1.4448	1.49538	-1.14374	0.691515	-0.698665	1.44513	-2.04314	0.382568	-0.380356	0.840199	-1.16863	1	P22626	Heterogeneous nuclear ribonucleoproteins A2/B1	HNRNPA2B1	YNGYGGGPGGGNFGGSPGYGGGRGGYGGGGP	259
1.4076	-1.97424	1.69227	-1.42871	1.37442	-1.38157	1.38455	-1.6502	0.97097	-0.968758	1.43557	-1.17109	1	P22626	Heterogeneous nuclear ribonucleoproteins A2/B1	HNRNPA2B1	GDSRGGGGNFGPGPGSNFRGGSDGYGSGRGF	225
1.20828	-1.21006	1.76595	-1.29786	0.611669	-0.722496	1.25512	-0.60919	0.179553	-0.177341	0.859783	-0.394295	0.982622	P22626	Heterogeneous nuclear ribonucleoproteins A2/B1	HNRNPA2B1	NMGGPYGGGNYGPGGSGGSGGYGGRSRY___	341
-0.454147	0.0698791	-0.058625	1.87931	-0.248476	0.0900065	-0.0914711	0.627733	-0.815495	0.376943	-0.37339	0.790203	0.999999	P22626	Heterogeneous nuclear ribonucleoproteins A2/B1	HNRNPA2B1	FGNYNQQPSNYGPMKSGNFGGSRNMGGPYGG	318
0.69125	-0.693024	1.70343	-2.18498	0.455691	-0.687692	1.1751	-0.453212	0.958921	-0.956709	2.25118	-1.20358	0.991002	P23193	Transcription elongation factor A protein 1	TCEA1	NSPEAREESTSSGNVSNRKDETNARDTYVSS	114
-0.344222	0.177475	-0.166221	0.386278	-0.434213	0.500869	-0.356247	0.364411	-0.306965	0.0457475	-0.0421945	0.356186	1	P23193	Transcription elongation factor A protein 1	TCEA1	DLDEKKKEPAITSQNSPEAREESTSSGNVSN	100
1.10956	-1.11133	1.26718	-1.45933	1.12985	-1.137	1.38868	-1.43247	0.2909	-0.288688	0.537632	-0.998145	0.994789	P23246	Splicing factor, proline- and glutamine-rich	SFPQ	RMGGGGAMNMGDPYGSGGQKFPPLGGGGGIG	626
1.79736	-1.68535	1.51828	-1.52636	1.2271	-0.830535	0.82907	-0.834382	0.134895	-0.783884	0.27576	-0.136236	1	P23246	Splicing factor, proline- and glutamine-rich	SFPQ	RRGGGGGRGGLHDFRSPPPGMGLNQNRGPMG	33
0.495998	-0.760042	0.241744	-0.249829	0.45373	-0.853265	0.0844678	-0.0763035	0.837883	-0.509219	0.408922	-0.408922	0.999999	P23528	Cofilin-1	CFL1	_____________MASGVAVSDGVIKVFNDM	3
0.440519	-0.99922	0.711532	-0.461632	0.552412	-0.559562	0.90295	-1.19324	0.208716	-0.646529	0.491078	-0.210057	1	P23588	Eukaryotic translation initiation factor 4B	EIF4B	RGYDSRIGSGRRAFGSGYRRDDDYRGGGDRY	283
0.110079	-0.840907	-0.120498	0.320371	-1.70675	-0.166214	0.16475	1.03851	-0.00788807	-0.0932481	0.00561862	0.734237	0.997878	P23588	Eukaryotic translation initiation factor 4B	EIF4B	WRSEETQERERSRTGSESSQTGTSTTSSRNA	422
-0.479893	0.00920017	0.00205392	0.644396	-1.54597	-0.219984	0.21852	0.596346	-1.63718	-0.140415	0.143968	0.78284	0.979894	P23588	Eukaryotic translation initiation factor 4B	EIF4B	SEETQERERSRTGSESSQTGTSTTSSRNARR	424
-1.05678	1.05501	-1.24748	1.52414	-1.2544	0.910909	-0.912373	1.76996	-0.599326	0.601538	-0.763988	1.05466	0.99932	P23588	Eukaryotic translation initiation factor 4B	EIF4B	AWVKRSSNPPARSQSSDTEQQSPTSGGGKVA	498
-0.0358855	-0.465443	0.12817	0.0147721	0.127859	-0.711902	0.0114531	-0.00328881	0.152633	-0.480524	-0.154902	0.193911	0.99993	P23588	Eukaryotic translation initiation factor 4B	EIF4B	SNPPARSQSSDTEQQSPTSGGGKVAPAQPSE	504
1.35024	-1.35201	1.80416	-2.03346	0.892426	-0.145698	0.144233	-3.87761	0.990733	-0.988521	1.29378	-1.11945	0.984528	P23588	Eukaryotic translation initiation factor 4B	EIF4B	DRGPPQRPKLNLKPRSTPKEDDSSASTSQST	340
-1.28525	0.0221434	-0.0108893	1.18014	-1.35337	-0.0775571	0.0760925	0.775955	-0.73378	-0.00478903	0.0083421	0.746347	1	P23588	Eukaryotic translation initiation factor 4B	EIF4B	NPASKFSSASKYAALSVDGEDENEGEDYAE_	597
-1.38475	2.44243	-1.98713	1.36364	-1.79613	2.33369	-1.53758	1.54574	-1.1584	2.1693	-0.910028	0.910028	0.993013	P25054	Adenomatous polyposis coli protein	APC	TPASKSPSEGQTATTSPRGAKPSVKSELSPV	2270
-0.292695	0.800749	-0.176178	0.168092	-0.420684	0.789085	-0.29739	0.305554	-0.300363	0.667604	-0.26682	0.26682	1	P25054	Adenomatous polyposis coli protein	APC	KRDSKTDSTESSGTQSPKRHSGSYLVTSV__	2830
-0.0877537	0.138312	0.0773352	-0.923289	-0.144117	0.339449	0.152203	-1.29752	-0.122961	0.136014	0.120692	-1.42466	0.959268	P25054	Adenomatous polyposis coli protein	APC	GISPPNKLSQLPRTSSPSTASTKSSGSGKMS	2350
1.47913	-1.48091	1.57846	-1.74157	1.18893	-1.19608	1.2799	-1.85324	0.526791	-0.52458	0.660279	-0.582684	0.999998	P25054	Adenomatous polyposis coli protein	APC	EAKVTSHTELTSNQQSANKTQAIAKQPINRG	1906
-0.188801	0.656527	-0.0524333	0.044348	-0.545871	0.45004	-0.451505	0.646541	-0.286421	0.288633	-0.425852	0.640562	0.99962	P25054	Adenomatous polyposis coli protein	APC	YSLKYSDEQLNSGRQSPSQNERWARPKHIIE	1042
-0.568456	0.280972	-0.269718	1.00186	-0.31323	0.0284836	-0.0299482	0.97123	-0.502502	0.504714	-0.888296	1.04701	0.999784	P25205	DNA replication licensing factor MCM3	MCM3	TEEEMPQVHTPKTADSQETKESQKVELSESR	728
1.44483	-0.54371	0.554964	-1.95858	1.32071	-0.349031	0.347566	-1.42682	1.74649	-0.647017	0.65057	-2.24741	0.857282	P25440	Bromodomain-containing protein 2	BRD2	GSAALGPSGFGPSGGSGTKLPKKATKTAPPA	611
1.10641	-0.533676	0.54493	-0.970936	1.78916	-1.02302	1.02156	-2.52854	1.18326	-0.718395	0.721948	-1.09132	0.984582	P25440	Bromodomain-containing protein 2	BRD2	KPPRKDLPDSQQQHQSSKKGKLSEQLKHCNG	340
-0.388253	0.354921	-0.343667	0.634049	-0.284839	0.277689	-0.411701	0.669724	-0.434373	0.311079	-0.307526	0.388854	1	P25788	Proteasome subunit alpha type-3	PSMA3	EAEKYAKESLKEEDESDDDNM__________	250
-0.42392	0.422145	-0.49519	0.420381	-0.438092	0.430942	-0.498219	0.574106	-0.356483	0.303495	-0.299942	0.333233	1	P26358	DNA (cytosine-5)-methyltransferase 1	DNMT1	ADDDEEVDDNIPEMPSPKKMHQGKKKKQNKN	714
-0.403392	0.401618	-0.431851	0.459137	-0.451522	0.482741	-0.485473	0.454001	-0.27845	0.691981	-0.1702	0.1702	1	P26368	Splicing factor U2AF 65 kDa subunit	U2AF2	PLTRGAKEEHGGLIRSPRHEKKKKVRKYWDV	79
-0.0121194	-0.74717	0.00170083	0.643973	0.0106512	-0.0178011	-0.406489	0.0193083	-0.535891	0.358343	-0.35479	0.673218	1	P26368	Splicing factor U2AF 65 kDa subunit	U2AF2	______________MSDFDEFERQLNENKQE	2
0.634951	-0.636726	0.84606	-1.0746	0.414905	-0.422055	0.670896	-0.793643	0.437412	-0.647103	0.571388	-0.438753	1	P26374	Rab proteins geranylgeranyltransferase component A 2	CHML	VMAKLESSEESKNLESPEKHLQN________	649
0.607203	-0.608977	0.912305	-0.986897	0.737816	-0.744966	1.18031	-1.41525	0.693897	-0.691685	0.956111	-0.969405	0.93307	P26599	Polypyrimidine tract-binding protein 1	PTBP1	IYIQFSNHKELKTDSSPNQARAQAALQAVNS	141
0.479334	-0.385588	0.396842	-1.68849	0.309094	-0.235633	0.234168	-1.10118	0.379431	-0.232176	0.235729	-1.05047	0.997869	P26639	Threonine--tRNA ligase, cytoplasmic	TARS	________MFEEKASSPSGKMGGEEKPIGAG	8
-0.0757083	-0.107278	0.372664	0.0545949	0.025165	-0.509398	0.239492	-0.0226861	0.104176	-0.241443	0.359835	-0.105517	1	P26639	Threonine--tRNA ligase, cytoplasmic	TARS	EEKQKEGGKKKNKEGSGDGGRAELNPWPEYI	39
1.70459	-1.70637	2.04082	-3.37265	0.6986	-0.856793	0.712598	-0.696121	1.00344	-1.00123	1.30266	-1.12344	1	P27694	Replication protein A 70 kDa DNA-binding subunit;Replication protein A 70 kDa DNA-binding subunit, N-terminally processed	RPA1	DGSRQPVLAIKGARVSDFGGRSLSVLSSSTI	384
-0.0973635	0.474815	-0.269527	0.0762501	-0.000789469	0.42324	0.00887544	-0.0453706	0.0170413	0.286502	-0.0193107	-0.377898	0.99873	P27816	Microtubule-associated protein 4	MAP4	KPKPIADAKAPEKRASPSKPASAPASRSGSK	787
0.144059	-0.0489459	0.0602	-0.746964	0.103167	-0.0297017	0.0282371	-0.562256	0.134716	0.22487	-0.136986	-1.0381	0.999996	P27816	Microtubule-associated protein 4	MAP4	APAKDVTLLKETERASPIKMDLAPSKDMGPP	358
0.820742	-0.646661	0.657915	-2.59092	0.557363	-0.420278	0.418813	-2.30238	0.556631	-0.468958	0.472511	-1.11313	0.997391	P27816	Microtubule-associated protein 4	MAP4	TTTAAAVASTGPSSRSPSTLLPKKPTAIKTE	825
1.97384	-1.97561	2.33084	-2.73297	1.20861	-1.21576	1.29313	-1.47495	0.327466	-0.66319	0.683838	-0.328807	0.999998	P27816	Microtubule-associated protein 4	MAP4	KPESNAVTKTAGPIASAQKQPAGKVQIVSKK	983
1.85047	-1.79893	1.81019	-4.83165	1.47448	-1.48163	1.48856	-4.17989	1.39642	-1.19757	1.20113	-2.13281	0.996427	P27816	Microtubule-associated protein 4	MAP4	TDYIPLLDVDEKTGNSESKKKPCSETSQIED	60
-1.04072	0.921108	-0.909854	1.254	-1.33527	1.10253	-1.104	1.45171	-1.17013	0.920947	-0.917394	1.39374	0.944324	P27816	Microtubule-associated protein 4	MAP4	NTSAPDLKNVRSKVGSTENIKHQPGGGRAKV	941
-0.381556	0.379782	-0.617108	0.494849	-0.395138	0.168709	-0.170174	0.513165	-0.247825	0.250037	-0.399461	0.543198	1	P27824	Calnexin	CANX	EDRKPKAEEDEILNRSPRNRKPRRE______	583
-0.425014	0.42324	-0.685596	0.465319	-0.294301	0.287152	-0.720929	0.795509	-0.780456	-0.035368	0.35124	0.0398492	1	P27824	Calnexin	CANX	DEEEEGEEKLEEKQKSDAEEDGGTVSQEEED	554
-0.463832	0.462058	-1.05718	0.494733	-0.826585	0.535528	-0.536993	0.912513	-0.779426	0.587629	-0.584076	0.940192	0.999985	P27824	Calnexin	CANX	EEKQKSDAEEDGGTVSQEEEDRKPKAEEDEI	564
1.35376	-1.34278	1.35404	-3.22924	0.682815	-0.689965	0.973713	-0.932711	0.574601	-0.572389	0.661014	-1.00491	0.999996	P28066	Proteasome subunit alpha type-5	PSMA5	MFLTRSEYDRGVNTFSPEGRLFQVEYAIEAI	16
0.280047	-0.581708	0.355098	-0.301161	0.0505123	-0.350481	-0.0424263	0.285752	-0.155341	0.157553	-0.390006	0.369031	0.955285	P28290	Sperm-specific antigen 2	SSFA2	QKGLEKAAAVADKRKSGSQDFPQCNTIENTG	591
-0.35955	0.357776	-0.473285	0.404503	-0.390977	0.612812	-0.549257	0.393456	-0.134896	0.328493	-0.162518	0.133555	0.991363	P28715	DNA repair protein complementing XP-G cells	ERCC5	SDAPGLPNGRELTPASPTCTNSVSKNETHAE	526
-0.334149	0.443384	-0.415114	0.313036	-0.295599	0.313528	-0.479386	0.298078	-0.290652	0.344116	-0.452187	0.289311	0.999906	P28715	DNA repair protein complementing XP-G cells	ERCC5	ARGRNAPAAVDEGSISPRTLSAIKRALDDDE	384
1.61026	-1.00377	1.01502	-2.61103	1.33707	-0.594616	0.593151	-2.5519	0.909886	-0.518375	0.521928	-1.18935	0.923894	P29084	Transcription initiation factor IIE subunit beta	GTF2E2	TPVVEKRSASSESSSSSSKKKKTKVEHGGSS	34
-0.0503111	0.048537	0.195618	-0.162439	-0.0160036	0.00885364	-0.127074	0.21797	-0.0358587	-0.0121439	0.015697	0.0405782	0.999999	P29692	Elongation factor 1-delta	EEF1D	SSPGHRATAPQTQHVSPMRQVEPPAKKPATP	133
-0.303011	0.301237	-0.31796	0.463822	-1.15349	1.0423	-1.04377	1.23386	-1.26004	0.950761	-0.947208	1.00042	0.999061	P29966	Myristoylated alanine-rich C-kinase substrate	MARCKS	ASSTSSPKAEDGATPSPSNETPKKKKKRFSF	145
0.0440071	-0.0457812	0.279067	-0.760786	-0.016865	0.0335	0.0249509	-0.42177	0.212561	-0.210349	0.261902	-1.00967	0.967708	P29966	Myristoylated alanine-rich C-kinase substrate	MARCKS	GEAAAERPGEAAVASSPSKANGQENGHVKVN	27
0.640242	-0.642016	1.0485	-0.785936	1.09549	-1.10264	1.62751	-1.6301	1.00445	-1.00224	1.23877	-1.11579	1	P29966	Myristoylated alanine-rich C-kinase substrate	MARCKS	EKGEPAAAAAPEAGASPVEKEAPAEGEAAEP	101
1.13142	-1.1332	1.53057	-2.15201	-0.155071	-0.357071	0.223777	0.15755	1.00956	-1.00735	1.20222	-2.09017	1	P29966	Myristoylated alanine-rich C-kinase substrate	MARCKS	ANGQENGHVKVNGDASPAAAESGAKEELQAN	46
1.03895	-0.285028	-0.37164	0.285587	1.38835	0.16846	-0.169924	-0.178863	0.834966	0.0765994	-0.188878	-0.0721182	0.938653	P30260	Cell division cycle protein 27 homolog	CDC27	TPQDTIELNRLNLESSNSKYSLNTDSSVSYI	220
0.544276	-0.024155	0.0354091	-0.99665	0.331376	0.234599	-0.236063	-0.828844	0.458956	-0.0383672	0.0419203	-0.197692	1	P30419	Glycylpeptide N-tetradecanoyltransferase 1	NMT1	DCENEEDNSYNRGGLSPANDTGAKKKKKKQK	47
-0.490057	0.311339	-0.300085	1.40484	-1.20813	0.0814786	-0.0829432	1.44448	-0.734295	0.12823	-0.124677	1.02407	0.999714	P31277	Homeobox protein Hox-D11	HOXD11	ADKGDPRTGAGGGGGSPCTKATPGSEPKGAA	223
-0.0380999	-0.0962817	0.390249	0.0169865	0.32615	-0.360842	0.935919	-0.323671	-0.0523917	-0.386558	0.401881	0.0510504	1	P31943	Heterogeneous nuclear ribonucleoprotein H;Heterogeneous nuclear ribonucleoprotein H, N-terminally processed;Heterogeneous nuclear ribonucleoprotein H2	HNRNPH1;HNRNPH2	NNVEMDWVLKHTGPNSPDTANDGFVRLRGLP;NSVEMDWVLKHTGPNSPDTANDGFVRLRGLP	104
0.34511	-0.346884	0.824869	-0.371675	0.0482018	-0.374028	0.734081	-0.0457228	0.000575851	-0.235624	0.404709	-0.00191716	1	P31948	Stress-induced-phosphoprotein 1	STIP1	DGYQRCMMAQYNRHDSPEDVKRRAMADPEVQ	481
-1.03027	0.574811	-0.563556	0.810422	-1.2509	1.06468	-0.936535	0.944699	-1.80787	0.848679	-0.708263	0.708263	0.864572	P32004	Neural cell adhesion molecule L1	L1CAM	QYSGKKEKEAAGGNDSSGATSPINPAVALE_	1243
0.655157	-0.615377	0.626632	-1.74469	0.338782	-0.317578	0.316114	-1.46838	0.308607	-0.118148	0.121701	-0.392173	0.974855	P32004	Neural cell adhesion molecule L1	L1CAM	KEKEAAGGNDSSGATSPINPAVALE______	1248
1.21897	-1.22074	1.84937	-1.45705	1.06791	-1.07506	1.61168	-2.24597	0.16596	-0.163748	0.811813	-0.220922	0.985798	P32242	Homeobox protein OTX1	OTX1	FKNRRAKCRQQQQSGSGTKSRPAKKKSSPVR	101
0.802659	-0.804434	1.28369	-1.18389	0.858184	-0.865334	1.36785	-1.84442	0.789266	-0.787054	1.34122	-1.66875	0.937686	P33316	Deoxyuridine 5'-triphosphate nucleotidohydrolase, mitochondrial	DUT	VQALDDTERGSGGFGSTGKN___________	248
0.495067	-0.261448	0.272702	-1.07373	0.39898	-0.251245	0.24978	-0.915531	0.585214	-0.274499	0.278052	-0.871051	0.989571	P33981	Dual specificity protein kinase TTK	TTK	KHTTFEQPVFSVSKQSPPISTSKWFDPKSIC	436
-0.65763	1.39617	-0.231047	0.222962	-0.879655	1.57809	0.191669	-0.183504	0.254233	0.225123	-0.303584	-0.220642	1	P33991	DNA replication licensing factor MCM4	MCM4	RGSRRGRATPAQTPRSEDARSSPSQRRRGED	26
0.00578401	0.0608734	-0.0162025	-0.687453	0.0487093	0.21723	-0.0406233	-0.182438	0.0237181	-0.0215063	0.0900074	-0.329993	1	P33991	DNA replication licensing factor MCM4	MCM4	SGVRGTPVRQRPDLGSAQKGLQVDLQSDGAA	120
0.245264	-0.247038	0.504323	-0.326779	0.057152	-0.256703	0.272424	-0.054673	-0.0678356	0.0700474	0.460394	-0.258073	0.967208	P35221	Catenin alpha-1;Catenin alpha-2	CTNNA1;CTNNA2	DSDFETEDFDVRSRTSVQTEDDQLIAGQSAR	655
-0.829099	0.960437	-1.02991	0.807986	-0.8517	0.84455	-1.08705	0.854415	-0.685557	0.974832	-0.918862	0.684215	0.999821	P35251	Replication factor C subunit 1	RFC1	TPKKTKSSPAKKESVSPEDSEKKRTNYQAYR	368
1.63173	-1.6335	1.74434	-3.70925	1.15786	-1.16501	1.41386	-4.18514	1.13218	-1.12997	1.37538	-2.50759	0.976269	P35269	General transcription factor IIF subunit 1	GTF2F1	PAAKRLRLDTGPQSLSGKSTPQPPSGKTTPN	433
-0.490966	0.362173	-0.350919	0.345938	-0.498227	0.393963	-0.395427	0.547129	-0.35031	0.352522	-0.437235	0.392659	1	P35579	Myosin-9	MYH9	FVVPRRMARKGAGDGSDEEVDGKADGAEAKP	1943
-0.920793	-0.105572	1.17148	0.106131	-0.515861	-0.237003	1.72863	0.229932	-0.105465	-0.076707	2.05199	0.0811882	0.873861	P35579	Myosin-9	MYH9	AQQERDELADEIANSSGKGALALEEKRRLEA	1714
0.369327	-0.223278	0.234532	-0.776267	0.155628	-0.328839	0.0737521	-0.0655878	0.40943	-0.407218	0.489601	-0.526165	0.87777	P35658	Nuclear pore complex protein Nup214	NUP214	SVLPSPSGRSAQGSSSPVPSMVQKSPRITPP	657
-0.751628	0.897531	-0.801797	0.730515	-1.03934	1.03219	-1.34277	1.20157	-0.513678	0.67101	-0.964544	0.512337	0.98034	P35658	Nuclear pore complex protein Nup214	NUP214	KTPERLSLEGERQPKSPGSTPTTPTSSQAPQ	430
1.18608	-0.957245	0.968499	-2.50859	0.865807	-0.555446	0.553981	-1.81617	0.408823	-0.406612	0.414075	-0.722476	0.999843	P35658	Nuclear pore complex protein Nup214	NUP214	SAPPSSVPLKSSVLPSPSGRSAQGSSSPVPS	646
-0.310063	0.370627	-0.478295	0.288949	-0.517276	0.538186	-0.676044	0.519755	-0.421812	0.595446	-0.523034	0.420471	1	P37275	Zinc finger E-box-binding homeobox 1	ZEB1	SANANEPQDSTVNLQSPLKMTNSPVLPVGST	679
0.0912681	-0.738149	0.726734	-0.112381	0.558103	-1.32417	1.17325	-0.555624	0.137506	-1.03272	0.437679	-0.138847	1	P37802	Transgelin-2	TAGLN2	PNWFPKKSKENPRNFSDNQLQEGKNVIGLQM	163
-0.394775	0.393001	-0.51948	0.455674	-0.394733	0.387583	-0.477367	0.577938	-0.260364	0.300606	-0.465617	0.259023	0.929226	P37837	Transaldolase	TALDO1	____________MSSSPVKRQRMESALDQLK	4
0.0125315	-0.419397	0.952152	-0.033645	-0.0439203	-0.531825	1.0364	0.0463993	-0.0451378	-0.26158	1.096	0.0437965	0.999412	P38159	RNA-binding motif protein, X chromosome;RNA-binding motif protein, X chromosome, N-terminally processed;RNA binding motif protein, X-linked-like-1	RBMX;RBMXL1	DDYSSSRDGYGGSRDSYSSSRSDLYSSCDRV;DDYSSSRDGYGGSRDSYSSSRSDLYSSGRDR	326
0.256261	-0.495081	0.273767	-0.277375	0.916562	-0.839396	0.837932	-2.07553	0.0198724	-0.0176606	0.380555	-0.0395829	0.999999	P38159	RNA-binding motif protein, X chromosome;RNA-binding motif protein, X chromosome, N-terminally processed;RNA binding motif protein, X-linked-like-1	RBMX;RBMXL1	SSGMGGRAPLSRGRDSYGGPPRREPLPSRRD;SSGMGGRAPVSRGRDSYGGPPRREPLPSRRD	189
0.145355	-0.147129	0.443446	-0.192677	0.216227	-0.158267	0.156803	-0.216903	0.108243	-0.272419	0.336767	-0.109584	1	P38159	RNA-binding motif protein, X chromosome;RNA-binding motif protein, X chromosome, N-terminally processed;RNA binding motif protein, X-linked-like-1	RBMX;RBMXL1	PPRREPLPSRRDVYLSPRDDGYSTKDSYSSR	208
-0.885895	0.88412	-1.60268	1.37199	-0.734317	0.727167	-1.15223	1.61093	-0.44709	0.449302	-0.948445	1.3622	1	P38398	Breast cancer type 1 susceptibility protein	BRCA1	YMHSCSGSLQNRNYPSQEELIKVVDVEEQQL	1524
0.260997	0.456847	-1.31001	-0.282111	0.409992	0.229104	-1.99221	-0.236176	0.468878	0.438509	-0.840292	-0.434027	0.97488	P38432	Coilin	COIL	TVFWKELIDPRLIIESPSNTSSTEPA_____	566
0.162089	-0.312277	0.276329	-0.183203	0.384832	-0.453356	0.737673	-0.382353	0.389313	-0.410115	0.491531	-0.390654	0.934875	P38432	Coilin	COIL	SISDGPSKVTLEARNSSEKLPTELSKEEPST	271
-0.0933237	-0.443559	0.0829052	0.146703	0.0376258	-0.0447758	0.153634	-0.156002	0.682537	-0.629848	0.633401	-1.66676	0.997565	P38919	Eukaryotic initiation factor 4A-III;Eukaryotic initiation factor 4A-III, N-terminally processed	EIF4A3	____MATTATMATSGSARKRLLKEEDMTKVE	12
1.56067	1.73381	-1.87062	-1.58179	1.28605	1.50733	-1.74524	-1.28357	1.6184	1.60235	-1.7763	-1.59787	1	P38936	Cyclin-dependent kinase inhibitor 1	CDKN1A	LSCTLVPRSGEQAEGSPGGPGDSQGRKRRQT	130
1.18554	-1.1026	1.11385	-1.55757	0.942061	-0.949211	0.950348	-1.82258	0.741353	-0.958527	0.931014	-0.742694	1	P39880	Homeobox protein cut-like 1	CUX1	SLNRLFQEVPKRRNGSEGNITTRIRASETGS	652
-0.0135586	0.292686	0.00314011	-0.0549771	-0.211163	0.105999	0.041619	-0.0334547	-0.0632801	0.0654919	0.119666	-0.206547	0.999812	P40123	Adenylyl cyclase-associated protein 2	CAP2	TYKNPSLRAQGGQTQSPTKSHTPSPTSPKSY	301
0.964837	-0.966611	1.23985	-1.50462	0.913586	-0.920736	1.14247	-2.64307	0.938429	-0.936218	1.05866	-1.59162	0.979243	P40123	Adenylyl cyclase-associated protein 2	CAP2	GPPPLFENEGKKEESSPSRSALFAQLNQGEA	257
0.00831419	-0.0100883	-0.082135	0.132989	0.0099547	-0.0171046	-0.132241	0.0184664	0.115156	-0.112945	-0.150296	0.172395	0.9968	P40222	Alpha-taxilin	TXLNA	GPERRPEGPGAQAPSSPRVTEAPCYPGAPST	515
1.24532	-1.24709	1.4997	-2.866	0.672142	-0.545967	0.525401	-0.517236	0.411258	-0.409047	0.595835	-1.20748	0.999989	P40818	Ubiquitin carboxyl-terminal hydrolase 8	USP8	EEHRIKSESTNHEQQSPQSGKVIPDRSTKPV	434
0.626737	-0.628511	1.04184	-0.85709	0.557556	-0.626184	1.12705	-0.555077	0.385478	-0.383266	0.875867	-0.540637	0.999989	P41227	N-alpha-acetyltransferase 10	NAA10	VVLGAIENKVESKGNSPPSSGEACREEKGLA	186
-0.473217	0.625751	-0.77205	0.452104	-0.383367	0.376217	-0.573402	0.604917	-0.12466	0.126872	-0.618492	0.689267	0.999995	P41236	Protein phosphatase inhibitor 2;Protein phosphatase inhibitor 2-like protein 3	PPP1R2;PPP1R2P3	AAEGLEPKYRIQEQESSGEEDSDLSPEEREK	121
-0.473217	0.625751	-0.77205	0.452104	-0.440493	0.433343	-0.630528	0.550781	-0.312147	0.535798	-0.867054	0.310806	0.999982	P41236	Protein phosphatase inhibitor 2;Protein phosphatase inhibitor 2-like protein 3	PPP1R2;PPP1R2P3	AEGLEPKYRIQEQESSGEEDSDLSPEEREKK	122
0.370829	-1.90803	0.31226	-0.320345	1.13361	-1.41829	0.550071	-0.541907	0.226467	-0.748307	0.36393	-0.227808	1	P42166	Lamina-associated polypeptide 2, isoform alpha;Thymopoietin;Thymopentin	TMPO	LYEKKLLKLREQGTESRSSTPLPTISSSAEN	156
0.976885	-0.905907	0.917161	-0.997503	1.03938	-0.819959	0.818494	-0.966663	0.825081	-0.822869	0.928668	-1.57793	0.962204	P42166	Lamina-associated polypeptide 2, isoform alpha;Thymopoietin;Thymopentin	TMPO	KKLLKLREQGTESRSSTPLPTISSSAENTRQ	159
0.370427	-0.377008	1.62531	-0.391541	0.378564	-0.385713	1.43535	-0.483365	0.436595	-0.434383	1.73244	-0.541691	0.999024	P42166	Lamina-associated polypeptide 2, isoform alpha;Thymopoietin;Thymopentin	TMPO	GTESRSSTPLPTISSSAENTRQNGSNDSDRY	168
1.97614	-1.73847	1.74973	-2.16016	0.782694	-0.665577	0.664113	-1.95883	0.808987	-0.547757	0.55131	-1.44721	0.999921	P42166	Lamina-associated polypeptide 2, isoform alpha;Thymopoietin;Thymopentin	TMPO	QKRIDQSKFQETEFLSPPRKVPRLSEKSVEE	424
-0.39326	0.391486	-0.463615	0.382186	-0.572242	0.289865	-0.291329	0.640082	-0.530569	0.262996	-0.259443	0.412349	0.999998	P42166	Lamina-associated polypeptide 2, isoform alpha;Thymopoietin;Thymopentin	TMPO	PPLPAGTNSKGPPDFSSDEEREPTPVLGSGA	66
-0.47966	0.477885	-0.468866	0.648592	-0.351427	0.344277	-0.422085	0.540709	-0.392406	0.453756	-0.337745	0.337745	1	P42166	Lamina-associated polypeptide 2, isoform alpha;Thymopoietin;Thymopentin	TMPO	AENTRQNGSNDSDRYSDNEEGKKKEHKKVKS	184
0.248494	-0.250268	0.313923	-0.629372	0.375297	-0.382447	0.533923	-1.40259	0.326023	-0.323811	0.508033	-1.28039	0.999957	P42166	Lamina-associated polypeptide 2, isoform alpha;Thymopoietin;Thymopentin	TMPO	GIQPLCPERSHISDQSPLSSKRKALEESESS	351
0.210311	-0.241545	0.480651	-0.231425	0.0608538	-0.186408	0.600878	-0.0583749	0.147341	-0.145129	0.327705	-0.166212	1	P42575	Caspase-2;Caspase-2 subunit p18;Caspase-2 subunit p13;Caspase-2 subunit p12	CASP2	TDRGVDQQDGKNHAGSPGCEESDAGKEKLPK	340
-0.113065	-0.144307	0.128808	0.0919516	0.00808561	0.178854	-0.0673437	-0.00560665	-0.0871108	-0.218657	0.0848414	0.101553	0.918166	P42679	Megakaryocyte-associated tyrosine-protein kinase	MATK	GAPASVSGQDADGSTSPRSQEP_________	501
0.565122	-0.469894	0.481148	-0.684705	0.587014	-0.429047	0.427582	-0.650543	0.297099	-0.622543	0.277429	-0.277429	0.999977	P42684	Abelson tyrosine-protein kinase 2	ABL2	SLAPGFIRGAQASSGSPALPRKQRDKSPSSL	620
0.175148	0.628472	-0.185567	-0.287609	0.0535998	0.283509	-0.304624	-0.0511208	0.15549	0.691988	-0.286432	-0.156831	0.999994	P42694	Probable helicase with zinc finger domain	HELZ	TEPKQVDLESNPQNRSPESRPSVVYPSTKFP	1317
-0.223546	0.221772	-1.87955	1.07008	-0.63824	0.631091	-1.50899	1.7068	-1.26682	1.26904	-1.76717	1.91905	0.923606	P42695	Condensin-2 complex subunit D3	NCAPD3	TLLRNSSAFSYQRQTSNRSEPSGEINIDSSG	517
-0.21231	0.885158	-0.612729	0.191197	-0.226245	0.284483	-0.558416	0.228724	0.166364	0.516115	-0.168634	-0.418387	1	P42696	RNA-binding protein 34	RBM34	RSVQEGENPDDGVRGSPPEDYRLGQVASSLF	28
0.694952	-1.03315	0.853579	-0.716065	0.726381	-0.733531	0.799904	-0.796408	0.600274	-0.619904	0.825515	-0.601616	0.988139	P43243	Matrin-3	MATR3	DGKKEPSDKAVKKDGSASAAAKKKLKKVDKI	705
-0.924786	0.923012	-1.11075	1.5585	-0.454378	0.40472	-0.406185	1.29565	-0.84548	0.847692	-1.39419	1.4647	0.999759	P43243	Matrin-3	MATR3	GIDLLKKDKSRKRSYSPDGKESPSDKKSKTD	598
0.0210892	-0.326206	0.578888	-0.0422027	0.00480295	-0.409695	0.350587	-0.00232398	0.0800917	-0.257013	0.44922	-0.081433	1	P43243	Matrin-3	MATR3	VPRDDWEEKRHFRRDSFDDRGPSLNPVLDYD	188
0.494259	-1.01271	0.719516	-0.515373	0.589015	-0.886684	1.0614	-0.586536	0.30422	-0.70572	0.583815	-0.305562	0.99894	P43243	Matrin-3	MATR3	_______MSKSFQQSSLSRDSQGHGRDLSAA	9
1.80322	-1.66772	1.67897	-3.34657	1.45634	-1.29358	1.29212	-3.28932	0.896675	-0.760918	0.735299	-0.735299	0.998815	P45973	Chromobox protein homolog 5	CBX5	YKKMKEGENNKPREKSESNKRKSNFSNSADD	85
0.641872	-0.686719	0.497251	-0.505337	0.959041	-0.831711	0.830247	-1.13295	0.749994	-0.740772	0.545328	-0.545328	1	P45973	Chromobox protein homolog 5	CBX5	SNSADDIKSKKKREQSNDIARGFERGLEPEK	110
1.68286	-1.19557	1.20683	-1.53325	1.78719	-1.1882	1.18673	-2.92819	0.647431	-0.581489	0.585042	-0.776553	0.999994	P45973	Chromobox protein homolog 5	CBX5	ENNKPREKSESNKRKSNFSNSADDIKSKKKR	92
-0.756997	0.755223	-0.767068	0.819883	-2.7523	2.11722	-2.11869	2.41362	-1.01658	0.526953	-0.5234	0.67055	1	P46013	Antigen KI-67	MKI67	VEVKAQSLVISPPAPSPRKTPVASDQRRRSC	584
1.51055	-1.48271	1.49396	-2.26744	1.30156	-1.23643	1.23497	-4.07161	1.54921	-1.40141	1.40497	-3.36216	0.998532	P46013	Antigen KI-67	MKI67	ESAKQTPAPAASVTGSRRRPRAPRESAQAIE	2783
-1.60641	1.60578	-0.688884	0.680799	-2.44984	1.91573	-0.942585	0.950749	-0.9996	1.86141	-0.66226	0.66226	0.996793	P46013	Antigen KI-67	MKI67	EELVAAGKTTKIPCDSPQSDPVDTPTSTKQR	1253
2.19765	-2.01711	2.02837	-3.65729	1.13951	-1.13505	1.13359	-2.45614	0.93642	-0.956782	0.772745	-0.772745	0.999981	P46013	Antigen KI-67	MKI67	GTPVQKLDLTENLTGSKRRPQTPKEEAQALE	1329
1.07857	-0.999303	0.876293	-0.884378	1.38245	-1.08703	1.08557	-1.09097	0.730287	-0.518936	0.522489	-0.922962	1	P46013	Antigen KI-67	MKI67	GTPVQKLDQPGNLPGSNRRLQTRKEKAQALE	1815
1.76497	-1.53844	1.5497	-2.41039	1.53144	-1.39461	1.39314	-3.24584	1.50386	-1.39068	1.39423	-2.45708	0.952508	P46013	Antigen KI-67	MKI67	GVKEEVLPVGKLTQTSGKTTQTHRETAGDGK	2022
-0.724779	0.685397	-0.674143	0.734695	-0.483608	0.476458	-0.81901	0.554699	-1.12374	1.08436	-0.958316	0.958316	1	P46013	Antigen KI-67	MKI67	PAKMKTPVQYSQQQNSPQKHKNKDLYTTGRR	357
-1.55431	0.915277	-0.288821	0.280735	-0.739537	0.889012	-0.458092	0.466256	-0.976145	1.12592	-0.374505	0.374505	0.821879	P46013	Antigen KI-67	MKI67	EAVAAGKTTKMPCESSPPESADTPTSTRRQP	1376
1.82704	-1.34208	1.33814	-1.34622	1.32338	-0.92045	0.918985	-1.14754	1.05093	-0.816256	0.819809	-1.18778	1	P46013	Antigen KI-67	MKI67	QKHKNKDLYTTGRRESVNLGKSEGFKAGDKT	374
1.82194	-1.50933	1.52058	-2.98728	1.54712	-1.19916	1.1977	-5.00159	1.19826	-1.0429	1.04646	-1.60721	0.99966	P46013	Antigen KI-67	MKI67	RSQHDILQMICSKRRSGASEANLIVAKSWAD	648
2.05991	-1.56766	1.57891	-3.25464	1.62342	-1.13352	1.13205	-4.37989	1.50674	-1.42917	1.43272	-2.85644	1	P46013	Antigen KI-67	MKI67	SSKSQTEVPKRGGRKSGNLPSKRVSISRSQH	621
1.05513	-0.879479	0.890733	-1.05982	1.39621	-1.18501	1.18355	-2.80671	1.39643	-1.17323	1.17678	-1.51528	0.977803	P46013	Antigen KI-67	MKI67	VACKSSQPDPDKNPASSKRRLKTSLGKVGVK	1628
0.97116	-0.972935	1.00122	-1.36908	1.34086	-1.34801	1.34823	-2.81476	0.576969	-0.574757	0.598244	-0.744402	0.986743	P46063	ATP-dependent DNA helicase Q1	RECQL	NSGNFQKKAANMLQQSGSKNTGAKKRKIDDA	634
0.575691	-1.34955	0.611154	-0.596804	1.16125	-1.11124	1.10977	-2.08245	1.11415	-1.03873	0.973314	-0.973314	1	P46087	Probable 28S rRNA (cytosine(4447)-C(5))-methyltransferase	NOP2	KRKKSQSRGNSQLLLS_______________	812
-0.974773	1.1769	-1.01237	0.953659	-1.56298	0.773021	-0.713431	0.721595	-0.574624	1.10911	-0.905727	0.573283	0.999992	P46087	Probable 28S rRNA (cytosine(4447)-C(5))-methyltransferase	NOP2	QKQNDTPKGPQPPTVSPIRSSRPPPAKRKKS	786
-0.308618	0.306844	-0.497136	0.365758	-0.501672	0.494522	-0.671993	0.771352	-0.241812	0.0596074	0.673834	-0.0551262	0.999551	P46087	Probable 28S rRNA (cytosine(4447)-C(5))-methyltransferase	NOP2	NAPPKGTDTQTPAVLSPSKTQATLKPKDHHQ	732
1.18287	-1.18465	1.55667	-1.40734	1.07793	-1.08508	1.55527	-1.27849	0.48499	-0.891179	0.650778	-0.486331	1	P46087	Probable 28S rRNA (cytosine(4447)-C(5))-methyltransferase	NOP2	LSSRARKRAAKRRLGSVEAPKTNKSPEAKPL	58
0.126747	-0.653209	4.95172	-0.14786	-0.661489	-0.119122	2.26364	0.112051	-1.16862	-0.350046	0.650362	0.354527	0.985408	P46087	Probable 28S rRNA (cytosine(4447)-C(5))-methyltransferase	NOP2	ELSTVPSVTKTQASSSFQDSSQPAGKAEGIR	675
0.773828	-0.395391	0.381179	-0.389264	0.532716	-0.539866	0.593821	-1.13798	0.192189	-0.376877	0.169891	-0.169891	0.955066	P46100	Transcriptional regulator ATRX	ATRX	KQKLSVPVRKKDKRNSSDSAIDNPKPNKLPK	703
-0.444817	0.535654	-0.595806	0.423704	-0.617702	0.610552	-0.912653	0.75951	-0.600725	0.708788	-0.821015	0.599384	0.999874	P46100	Transcriptional regulator ATRX	ATRX	NKLPKSKQSETVDQNSDSDEMLAILKEVSRM	729
-0.701554	0.69978	-0.861691	0.776754	-0.738713	0.731563	-0.952884	0.908361	-0.542925	0.624489	-1.05627	0.541583	0.999993	P46100	Transcriptional regulator ATRX	ATRX	TPLRRPTETNPVTSNSDEECNETVKEKQKLS	677
-0.416454	0.41468	-0.487386	0.58793	-0.49434	0.48719	-0.667484	0.735376	-0.437542	0.439754	-0.590444	0.594029	1	P46379	Large proline-rich protein BAG6	BAG6	PLPEEPMEVQGAERASPEPQRENASPAPGTT	964
-0.301001	0.299227	-0.628485	0.620325	-0.306778	0.299629	-0.511425	0.962934	-0.305396	0.307607	-0.666533	0.56	0.99829	P46379	Large proline-rich protein BAG6	BAG6	QGAERASPEPQRENASPAPGTTAEEAMSRGP	973
0.231348	-0.634104	0.0262853	-0.0343706	0.571985	-0.230082	0.228618	-0.528043	0.318083	-0.390468	0.171916	-0.171916	1	P46379	Large proline-rich protein BAG6	BAG6	LRSDIQKRLQEDPNYSPQRFPNAQRAFADDP	1117
0.618608	-0.620382	0.729737	-0.689878	1.00427	-1.01142	1.1178	-1.82027	1.25075	-0.722268	0.725821	-1.30597	0.999988	P46937	Transcriptional coactivator YAP1	YAP1	LLRQAMRNINPSTANSPKCQELALRSQLPTL	340
-0.445801	0.551066	-0.515744	0.424688	-0.825831	0.664306	-0.66577	0.913655	-1.00123	1.00344	-1.13693	1.42607	0.819919	P46937	Transcriptional coactivator YAP1	YAP1	SFFKPPEPKSHSRQASTDAGTAGALTPQHVR	109
-0.31037	0.850539	0.299951	-0.439332	0.192804	-0.121866	0.120402	-0.335605	0.316885	0.201194	-0.197641	-0.527076	0.999998	P46937	Transcriptional coactivator YAP1	YAP1	SQSAPVKQPPPLAPQSPQGGVMGGSNSNQQQ	289
0.552283	-0.501019	0.512273	-1.22209	0.427679	-0.434829	0.488205	-1.28428	0.592723	-0.402928	0.406481	-0.601186	0.995474	P46939	Utrophin	UTRN	TLEELRRNMRSQPLTSPESRTARGGSQMDVL	1405
-0.324129	-0.232678	0.243932	0.84394	-0.622452	0.589345	-0.59081	0.858176	-0.381642	0.383854	-0.491259	0.551472	0.978139	P47712	Cytosolic phospholipase A2;Phospholipase A2;Lysophospholipase	PLA2G4A	ESIEYRRQNPSRCSVSLSNVEARRFFNKEFL	729
-0.427056	0.443698	-0.692152	0.405943	-0.276824	0.215626	-0.21709	0.420427	-0.197224	0.199436	-0.358248	0.396224	0.99977	P47712	Cytosolic phospholipase A2;Phospholipase A2;Lysophospholipase	PLA2G4A	ENITTKHIVSNDSSDSDDESHEPKGTENEDA	437
-0.371106	0.201764	-0.19051	0.295511	-0.12945	0.0612185	-0.0626831	0.172267	-0.28364	0.00613234	0.184082	-0.00165112	0.999997	P47914	60S ribosomal protein L29	RPL29	VPAQAPKRTQAPTKASE______________	158
-0.0594912	-0.567208	0.0490726	0.561603	-1.26826	0.359929	-0.361393	1.387	-1.21863	0.434216	-0.430663	1.56659	0.998209	P47974	Zinc finger protein 36, C3H1 type-like 2	ZFP36L2	TALLNKENKFRDRSFSENGDRSQHLLHLQQQ	125
-0.540139	0.105656	-0.094402	0.568384	-0.340232	0.102668	-0.104133	0.755351	-0.652149	0.08876	-0.085207	0.623089	0.999849	P48634	Protein PRRC2A	PRRC2A	PGVHPSGLVPRERSDSGGSSSEPFDRHAPAM	761
0.687505	-0.431444	0.442698	-1.12303	0.205075	-0.212225	0.322365	-0.418318	0.726991	-0.473255	0.476808	-0.618254	1	P48634	Protein PRRC2A	PRRC2A	GKLGGPKETPPNGNLSPAPRLRRDYSYERVG	1004
1.02341	-1.01213	1.02339	-1.99558	1.02305	-1.0302	1.07005	-1.30854	1.0293	-0.648701	0.563224	-0.563224	1	P48634	Protein PRRC2A	PRRC2A	LTGPEAGRKPARGVGSGGQGPPPPRRESRTE	908
1.14641	-0.459293	0.470547	-1.08115	2.00774	-0.144089	0.142624	-1.27746	1.39135	-0.409008	0.412561	-0.613905	1	P48634	Protein PRRC2A	PRRC2A	SGVFRTQRVDLYQQASPPDALRWIPKPWERT	2113
-0.242492	0.487896	-0.143369	0.135284	-0.358105	0.40357	-0.0722261	0.0803904	0.0129773	0.00316831	0.000384761	-0.49601	0.999786	P48651	Phosphatidylserine synthase 1	PTDSS1	EISWHHRKGTKGSEDSPPKHAGNNESHSSRR	442
0.987353	-0.989127	1.10245	-1.08878	0.834929	-0.842078	0.891859	-1.50969	0.429361	-0.452355	0.472056	-0.430702	0.999999	P48730	Casein kinase I isoform delta	CSNK1D	RHSRNPATRGLPSTASGRLRGTQEVAPPTPL	331
-0.709358	-0.0875333	0.0987874	0.276665	-0.571072	-0.289639	0.759228	0.282567	-1.07665	-0.1417	0.167324	0.146181	0.999525	P48960	CD97 antigen;CD97 antigen subunit alpha;CD97 antigen subunit beta	CD97	TTSGTGHNQTRALRASESGI___________	831
-0.78653	-0.0392224	0.0504765	0.275694	-0.295459	0.288309	-0.434086	0.779752	-0.382775	-0.075036	0.0785891	0.267127	0.80632	P49006	MARCKS-related protein	MARCKSL1	FKRNRKEGGGDSSASSPTEEEQEQGEIGACS	120
0.44175	0.0213924	-0.0101383	-1.82729	0.483821	0.0425753	-0.0440399	-2.23666	0.517839	0.208224	-0.204671	-0.880421	1	P49006	MARCKS-related protein	MARCKSL1	KAPRGDVTAEEAAGASPAKANGQENGHVKSN	22
-0.0798213	-0.177867	0.0694027	0.262798	-0.0471089	-0.211408	0.0551949	0.255398	-0.0297627	-0.0656936	0.0274933	0.333747	0.846722	P49023	Paxillin	PXN	ERCWAAGWPRDGGRSSPGGQDEGGFMAQGKT	303
1.17231	-1.0794	1.09065	-2.20392	0.636422	-0.39559	0.394125	-1.06484	0.491059	-0.451371	0.262259	-0.262259	0.999998	P49023	Paxillin	PXN	SAKTSSVSNPQDSVGSPCSRVGEEEHVYSFP	106
0.423566	-0.42534	1.23049	-0.502548	0.339295	-0.346445	0.957296	-0.389926	0.983162	-0.98095	1.86346	-1.15889	0.999897	P49447	Cytochrome b561	CYB561	EQALSMDFKTLTEGDSPGSQ___________	247
0.374627	-0.243215	0.25447	-0.821689	0.157605	-0.0357602	0.0342955	-1.23154	0.393019	-0.15765	0.161203	-0.362335	1	P49454	Centromere protein F	CENPF	SMPSERSECRLEADQSPKNSAILQNRVDSLE	821
0.481098	-0.381256	0.39251	-1.08577	0.513029	-0.269114	0.26765	-1.28133	0.283635	-0.281423	0.286925	-0.616269	0.984903	P49454	Centromere protein F	CENPF	VPGPSPIPSVTEKRLSSGQNKASGKRQRSSG	2922
-1.33832	0.158972	3.94165	-0.158413	-0.551724	-1.33614	4.71227	0.554203	-0.745096	-0.780958	3.56134	0.743755	0.983935	P49454	Centromere protein F	CENPF	VQQALRSEMTDNQNNSKSEAGGLKQEIMTLK	1121
-0.647911	1.8048	-0.405864	0.397779	-1.03297	2.5406	-0.562772	0.570936	-0.868574	2.46823	-0.483281	0.483281	0.999785	P49454	Centromere protein F	CENPF	EPTTKSVPVNNLPERSPTDSPREGLRVKRGR	3079
0.19062	-0.122055	0.133309	-0.489231	-0.118206	-0.0304658	0.0290012	0.0312321	0.0723304	-0.132424	0.0784423	-0.0736717	0.999625	P49454	Centromere protein F	CENPF	TAGGSRSQKVKVAQRSPVDSGTILREPTTKS	3054
-0.425116	0.423342	-0.655071	0.521238	-0.378557	0.371407	-0.515249	0.612921	-0.336064	0.338276	-0.422706	0.55368	1	P49585	Choline-phosphate cytidylyltransferase A	PCYT1A	SPANLSRHKAAAYDISEDEED__________	362
0.872233	-0.874007	1.51575	-1.58335	0.387102	-0.394252	0.949899	-0.934211	0.70259	-0.700378	1.39221	-1.18922	0.99999	P49593	Protein phosphatase 1F	PPM1F	LPSSLPEPETQAPPRS_______________	454
-0.492801	0.371603	-0.360349	0.678718	-0.519713	0.377401	-0.378865	0.76228	-0.371088	0.338685	-0.335132	0.742087	0.992363	P49674	Casein kinase I isoform epsilon	CSNK1E	VASTPASRIQPAGNTSPRAISRVDRERKVSM	363
-0.0293202	0.0275461	-0.239236	0.634838	-0.211643	0.0170258	-0.0184904	0.132909	-0.247773	0.171836	-0.15375	0.15375	0.994914	P49736	DNA replication licensing factor MCM2	MCM2	___MAESSESFTMASSPAQRRRGNDPLTSSP	13
-0.194746	0.149779	-0.138525	0.637116	-0.598897	0.040966	-0.0424306	0.628654	-0.26839	0.230773	-0.22722	0.407189	1	P49736	DNA replication licensing factor MCM2	MCM2	AGRGLGRMRRGLLYDSDEEDEERPARKRRQV	139
-0.292516	0.101035	-0.0897806	0.783524	0.176997	-0.716002	-0.168911	0.615003	-0.0400499	-0.437706	0.0377804	0.575651	0.999805	P49736	DNA replication licensing factor MCM2	MCM2	SSPAQRRRGNDPLTSSPGRSSRRTDALTSSP	27
0.4112	-0.296653	0.307907	-0.382279	-0.0448382	-0.436888	0.053053	0.0473172	0.341173	-0.214788	0.218341	-0.31268	1	P49750	YLP motif-containing protein 1	YLPM1	RPGSSREKVPGGLQGSQDRGAAGSRERGPPR	1100
-0.712779	0.711004	-0.953748	0.941383	-0.836444	0.829294	-0.979457	1.07028	-0.690904	0.693116	-0.867881	1.17067	0.997785	P49756	RNA-binding protein 25	RBM25	HRPKIGLSLKLGASNSPGQPNSVKRKKLPVD	677
1.646	-1.63311	1.64437	-2.22591	0.922402	-0.855231	0.853766	-1.27476	1.18372	-2.58408	1.13021	-1.13021	0.999999	P49790	Nuclear pore complex protein Nup153	NUP153	GSNGKNVFSSSGTSFSGRKIKTAVRRRK___	1463
-0.08592	0.0695247	0.403561	-0.0689656	-0.252281	-0.108509	0.300859	0.101437	0.335427	-0.435501	0.501676	-0.336769	0.972813	P49792	E3 SUMO-protein ligase RanBP2	RANBP2	LVGPPLAETVFTPKTSPENVQDRFALVTPKK	1400
1.57223	-1.574	1.62869	-1.94119	1.14744	-1.04833	1.04687	-2.00717	1.06714	-1.06493	1.11264	-1.77043	0.920613	P49792	E3 SUMO-protein ligase RanBP2	RANBP2	KCIACQNPGKQNQTTSAVSTPASSETSKAPK	1640
0.233784	-0.23479	0.246044	-1.20685	0.230602	-0.114682	0.113218	-0.766438	0.145005	-0.0281907	0.0317438	-0.333462	1	P49815	Tuberin	TSC2	KSLRIARPPKQGLNNSPPVKEFKESSAAEAF	960
-0.27133	0.496998	-0.231203	0.223118	-0.303382	0.548555	-0.267769	0.275934	-0.234086	0.463519	-0.0992624	0.0992624	0.999662	P49848	Transcription initiation factor TFIID subunit 6	TAF6	APGTPKANGSQPNSGSPQPAP__________	672
-0.212228	0.210454	-0.253039	0.281297	-0.425373	0.418223	-0.612419	0.572402	-0.0218361	0.0240479	-0.18752	0.0989564	0.955782	P49916	DNA ligase 3	LIG3	KAVVQAKLTTTGQVTSPVKGASFVTSTNPRK	210
-0.596797	0.565248	-0.553994	0.575363	-0.523843	0.516693	-0.542206	0.694845	-0.538885	0.729106	-0.466509	0.466509	0.994376	P49916	DNA ligase 3	LIG3	SGFSAKPNNSGEAPSSPTPKRSLSSSKCDPR	242
1.19352	-1.58563	1.46465	-1.21463	1.53318	-1.54033	1.56226	-1.7713	0.586368	-0.584156	1.25097	-0.721669	0.999978	P50402	Emerin	EMD	YEESYFTTRTYGEPESAGPSRAVRQSVTSFP	110
-0.426115	0.462167	-0.516091	0.405001	-0.418072	0.410922	-0.491669	0.583766	-0.325996	0.328208	-0.480238	0.384267	0.999998	P50613	Cyclin-dependent kinase 7	CDK7	GVLKLADFGLAKSFGSPNRAYTHQVVTRWYR	164
-0.129929	0.128155	-0.196194	0.925013	-0.375711	0.254404	-0.255869	0.893231	-0.0280119	0.0302236	-0.213498	0.137405	0.999943	P50747	Biotin--protein ligase;Biotin--[methylmalonyl-CoA-carboxytransferase] ligase;Biotin--[propionyl-CoA-carboxylase [ATP-hydrolyzing]] ligase;Biotin--[methylcrotonoyl-CoA-carboxylase] ligase;Biotin--[acetyl-CoA-carboxylase] ligase	HLCS	DDPKALGEEPKQRRGSASGSEPAGDSDRGGG	79
0.223303	-0.794473	-0.0458221	0.0377369	0.556576	-0.189501	-0.00244568	0.01061	0.017972	-0.0255881	0.00644717	-0.00644717	0.994784	P50750	Cyclin-dependent kinase 9	CDK9	LTSMFEYLAPPRRKGSQITQQSTNQSRNPAT	347
0.189991	-0.223769	0.605985	-0.211104	0.355897	-0.363047	0.831491	-0.43935	0.337928	-0.359794	0.865483	-0.339269	1	P51153	Ras-related protein Rab-13	RAB13	SSLARDILLKSGGRRSGNGNKPPSTDLKTCD	178
0.00491132	-0.00668542	-0.0301332	0.308137	-0.0715129	0.064363	-0.109424	0.0929678	-0.00372833	-0.159402	0.00145887	0.471055	0.883216	P51397	Death-associated protein 1	DAP	_____________MSSPPEGKLETKAGHPPA	3
-0.551749	0.595817	-0.370631	0.362545	-0.480551	0.6051	-0.371012	0.379177	-0.320347	0.668581	-0.286893	0.286893	0.985454	P51608	Methyl-CpG-binding protein 2	MECP2	SEGSGSAPAVPEASASPKQRRSIIRDRGPMY	80
0.414753	-0.416527	0.893017	-0.59824	0.577948	-0.585098	1.19486	-1.05701	0.666368	-0.721715	1.23199	-0.667709	0.835304	P51692	Signal transducer and activator of transcription 5B	STAT5B	LYNEQRLVREANNGSSPAGSLADAMSQKHLQ	128
0.537492	-0.539266	1.47528	-0.711958	0.735363	-0.83193	2.0447	-0.732884	0.647965	-0.795076	1.74338	-0.649307	1	P51812	Ribosomal protein S6 kinase alpha-3	RPS6KA3	KGAMAATYSALNRNQSPVLEPVGRSTLAQRR	715
-0.0641924	0.0624183	-0.454599	0.568543	-0.119629	0.112677	-0.153995	0.122108	-0.0689276	0.166826	-0.554448	0.0675863	1	P51825	AF4/FMR2 family member 1	AFF1	APPEAPHPGKRSCQKSPAQQEPPQRQTVGTK	588
-0.221816	0.220041	-0.359814	0.357073	-0.191244	0.153312	-0.154776	0.396825	-0.424157	0.222863	-0.21931	0.416291	1	P51858	Hepatoma-derived growth factor	HDGF	EKGALKRRAGDLLEDSPKRPKEAENPEGEEK	165
1.6263	-1.62807	1.83531	-1.88554	1.16234	-1.19888	1.20731	-1.15986	1.01698	-1.01477	1.36854	-1.56034	0.963838	P51858	Hepatoma-derived growth factor	HDGF	WEIENNPTVKASGYQSSQKKSCVEEPEPEPE	102
0.060407	-0.950735	-0.0708255	0.870372	0.351823	-1.09312	0.21332	-0.205156	0.395952	-0.79446	0.561681	-0.397293	0.974816	P51858	Hepatoma-derived growth factor	HDGF	EIENNPTVKASGYQSSQKKSCVEEPEPEPEA	103
-0.105792	0.0572605	-0.0460064	0.4817	0.00217656	-0.0093265	0.00563317	0.256264	0.0128977	-0.010686	-0.114629	0.0890752	1	P51858	Hepatoma-derived growth factor	HDGF	LPMEVEKNSTPSEPGSGRGPPQEEEEEEDEE	206
-0.483293	0.419642	-0.408388	0.476072	-0.125506	0.118356	-0.156545	0.366176	-0.280374	0.266331	-0.262778	0.609013	1	P51858	Hepatoma-derived growth factor	HDGF	EAAEGDGDKKGNAEGSSDEEGKLVIDEPAKE	132
-0.430253	0.214791	-0.203537	0.51758	-0.125506	0.118356	-0.156545	0.366176	-0.331833	0.131866	-0.128313	0.431519	1	P51858	Hepatoma-derived growth factor	HDGF	AAEGDGDKKGNAEGSSDEEGKLVIDEPAKEK	133
0.209124	-0.83083	0.340658	-0.230238	0.935758	-0.942908	1.05148	-1.81501	0.320508	-0.318296	0.425518	-0.403968	1	P51991	Heterogeneous nuclear ribonucleoprotein A3	HNRNPA3	__MEVKPPPGRPQPDSGRRRRRRGEEGHDPK	14
0.707281	-0.709055	0.870941	-1.23182	0.807769	-0.814919	0.952883	-0.882649	0.290771	-0.420163	0.454123	-0.292112	0.999204	P51991	Heterogeneous nuclear ribonucleoprotein A3	HNRNPA3	YGPMKGGSFGGRSSGSPYGGGYGSGGGSGGY	358
0.550441	-0.552215	0.658278	-0.630381	1.10332	-0.955099	0.953634	-1.61972	0.310312	-0.368771	0.177487	-0.177487	0.996809	P52292	Importin subunit alpha-1	KPNA2	MLKRRNVSSFPDDATSPLQENRNNQGTVNWS	62
-0.823905	0.714495	-0.551753	0.543668	-0.863793	0.73204	-0.639057	0.647222	-0.7427	0.624528	-0.620975	0.74749	0.999996	P52594	Arf-GAP domain and FG repeat-containing protein 1	AGFG1	DSAPTLHLNKGTPSQSPVVGRSQGQQQEKKQ	181
0.802293	-0.748868	0.760122	-1.17492	0.551188	-0.424574	0.423109	-1.27214	0.48117	-0.478959	0.735504	-0.753141	0.999988	P52701	DNA mismatch repair protein Msh6	MSH6	__MSRQSTLYSFFPKSPALSDANKASARASR	14
1.22567	-1.12254	1.13379	-1.67828	1.05502	-0.859427	0.857963	-1.10103	1.45295	-0.857295	0.860848	-1.65189	0.972919	P52732	Kinesin-like protein KIF11	KIF11	_________MASQPNSSAKKKEEKGKNIQVV	7
1.30287	-1.06039	1.07164	-1.22946	0.616999	-0.735471	0.43179	-0.423625	0.689359	-0.647733	0.651286	-1.03349	0.949332	P52732	Kinesin-like protein KIF11	KIF11	________MASQPNSSAKKKEEKGKNIQVVV	8
-2.13201	-0.295443	0.306697	1.01908	-2.86837	-0.513684	0.512219	1.07685	-1.28246	-0.231142	0.234695	0.787841	0.97728	P52948	Nuclear pore complex protein Nup98-Nup96;Nuclear pore complex protein Nup98;Nuclear pore complex protein Nup96	NUP98	ALDQRFSRLPSKADTSQEICSPRLPISASHS	1023
1.17783	-0.593791	0.275237	-0.283322	1.38774	-0.437625	0.436161	-1.23886	0.641903	-0.160881	-0.968104	0.165362	1	P52948	Nuclear pore complex protein Nup98-Nup96;Nuclear pore complex protein Nup98;Nuclear pore complex protein Nup96	NUP98	FSRLPSKADTSQEICSPRLPISASHSSKTRS	1028
-0.331171	0.329397	-0.903286	0.362213	-0.218026	0.210876	-0.993478	0.381677	-0.259928	0.26214	-0.665196	0.342525	0.999915	P52948	Nuclear pore complex protein Nup98-Nup96;Nuclear pore complex protein Nup98;Nuclear pore complex protein Nup96	NUP98	SNLFSPVNRDSENLASPSEYPENGERFSFLS	623
1.28338	-1.01298	0.127756	-0.135841	0.634819	-1.37869	0.174026	-0.165862	1.50749	-0.344826	0.348379	-1.22622	1	P52948	Nuclear pore complex protein Nup98-Nup96;Nuclear pore complex protein Nup98;Nuclear pore complex protein Nup96	NUP98	IKKLVLKNLNNSNLFSPVNRDSENLASPSEY	612
0.0413882	-0.0431623	0.199885	-0.469182	0.00703961	-0.0141895	0.12114	-0.100256	0.0631844	-0.0609726	0.158056	-0.65102	0.999995	P52948	Nuclear pore complex protein Nup98-Nup96;Nuclear pore complex protein Nup98;Nuclear pore complex protein Nup96	NUP98	QMALNGKPAPPPQSQSPEVEQLGRVVELDSD	934
-0.858381	0.0843552	-0.0731011	0.649372	-1.03405	0.0734073	-0.0748719	0.855712	-0.748098	0.108483	-0.104929	0.708775	0.995088	P53396	ATP-citrate synthase	ACLY	NASGSTSTPAPSRTASFSESRADEVAPAKKA	455
1.37278	-1.37455	2.01187	-1.78194	1.14817	-1.15532	1.82225	-1.92999	1.13384	-1.13163	1.66729	-1.37094	1	P53621	Coatomer subunit alpha;Xenin;Proxenin	COPA	TVRVWDISGLRKKNLSPGAVESDVRGITGVD	173
1.63652	-1.00997	1.02123	-1.8053	1.71645	-1.1019	1.10044	-3.39214	1.25684	-0.924117	0.616566	-0.616566	1	P53814	Smoothelin	SMTN	RKAMIEKLEKEGAAGSPGGPRAAVQRSTSFG	779
1.07127	-0.466644	0.477898	-0.634507	0.90768	-0.357695	0.356231	-0.874072	1.00836	-0.347564	0.351117	-1.0909	0.999959	P53814	Smoothelin	SMTN	VNKLLSGPKETPAAQSPTRGPSDTKRADVAG	277
0.362668	1.58642	-0.373086	-0.629169	0.346632	1.65102	-0.338546	-0.54631	0.35504	1.21573	-0.35731	-0.808154	0.951176	P53814	Smoothelin	SMTN	PPPSPPKTTSPEPQESPTLPSTEGQVVNKLL	251
0.888224	-0.889998	1.05156	-1.73568	0.88355	-0.8907	1.28794	-1.78419	0.740542	-1.02125	0.80604	-0.741883	1	P53985	Monocarboxylate transporter 1	SLC16A1	IDVAGKPNEVTKAAESPDQKDTDGGPKEEES	483
-0.113425	-0.291349	1.08155	0.0923118	0.0493923	-0.314003	1.35664	-0.0469134	0.111698	-0.250503	0.926174	-0.113039	0.947137	P53999	Activated RNA polymerase II transcriptional coactivator p15	SUB1	KTGETSRALSSSKQSSSSRDDNMFQIGKMRY	56
0.923875	-0.764106	0.77536	-0.793915	0.453056	-0.331781	0.330316	-0.443563	0.273538	-0.634802	0.36894	-0.274879	1	P54259	Atrophin-1	ATN1	PALRTLSEYARPHVMSPGNRNHPFYVPLGAV	896
1.10337	-1.10515	1.17133	-2.14023	0.937261	-0.944411	0.996512	-2.29029	0.972369	-0.970157	1.01675	-1.99859	0.997703	P54278	Mismatch repair endonuclease PMS2;Protein PMS2CL	PMS2;PMS2CL	HAADLEKPMVEKQDQSPSLRTGEEKKDVSIS	403
0.243133	-0.244907	1.08191	-0.874408	0.449694	-0.456844	1.43427	-0.726863	0.452277	-0.450065	1.24868	-0.957701	0.86224	P54725	UV excision repair protein RAD23 homolog A	RAD23A	AREDKSPSEESAPTTSPESVSGSVPSSGSSG	133
0.418902	-0.420676	0.516742	-0.480826	0.0841685	-0.0913184	0.551678	-0.36563	0.297484	-0.295272	0.388554	-0.99897	0.995618	P54727	UV excision repair protein RAD23 homolog B	RAD23B	QEKPAEKPAETPVATSPTATDSTSGDSSRSN	160
-0.0988685	0.115667	0.0884499	-1.12729	-0.0318868	0.0247369	0.110493	-0.710383	0.0310799	0.10745	-0.0333493	-0.410467	0.986151	P55196	Afadin	MLLT4	CRDAKEKRSKSQDADSPGSSGAPENLTFKER	1779
-1.03201	0.901564	-0.89031	0.899913	-1.87811	0.68095	-0.682415	0.978848	-1.30421	1.10303	-1.09948	1.17411	1	P55196	Afadin	MLLT4	RADHRSSPNVANQPPSPGGKSAYASGTTAKI	1182
-1.2194	0.952388	-0.941134	1.17035	-0.928327	0.857445	-0.858909	1.51849	-0.869478	0.499455	-0.495902	0.909775	0.91527	P55198	Protein AF-17	MLLT6	GGGSGFISGRRSRSASPSTQQEKHPTHHERG	222
-0.00534403	0.199315	-0.00507448	-0.11538	-0.703482	0.696332	-0.875369	1.03803	0.16951	0.303173	-0.244628	-0.170851	0.999998	P55210	Caspase-7;Caspase-7 subunit p20;Caspase-7 subunit p11	CASP7	MADDQGCIEEQGVEDSANEDSVDAKPDRSSF	16
0.00804478	0.13522	-0.0184633	-1.08943	-0.0597586	0.219668	0.0678446	-0.123024	-0.0330014	0.165351	0.030732	-1.01045	1	P55265	Double-stranded RNA-specific adenosine deaminase	ADAR	VTGASLRRTMLLLSRSPEAQPKTLPLTGSTF	825
-0.299424	-0.264956	1.00923	0.265515	-0.100826	-0.446347	1.03711	0.103305	-0.0498662	-0.803997	0.142413	0.0485249	0.991362	P55735	Protein SEC13 homolog	SEC13	QWVCISDVNKGQGSVSASVTEGQQNEQ____	311
0.237335	-0.815758	0.481207	-0.258449	1.05382	-1.06097	1.69096	-1.48065	0.719207	-0.737362	1.29093	-0.720548	1	P55884	Eukaryotic translation initiation factor 3 subunit B	EIF3B	DLKKYSKIFEQKDRLSQSKASKELVERRRTM	738
-0.840005	0.618422	-0.607168	1.39141	-0.736257	0.729107	-0.795412	1.79188	-0.810486	0.812698	-0.848297	1.51431	0.999917	P55884	Eukaryotic translation initiation factor 3 subunit B	EIF3B	QGEAPGEQARDERSDSRAQAVSEDAGGNEGR	119
0.49145	-0.493224	0.809324	-0.785493	0.633288	-0.640438	1.31716	-0.804925	0.306812	-0.616761	0.885342	-0.308153	1	P56192	Methionine--tRNA ligase, cytoplasmic	MARS	GVLALRPYLQKQPQPSPAEGRAVTNEPEEEE	209
-0.367584	0.36581	-0.403155	0.5801	-0.258401	0.117526	-0.11899	0.423161	-0.369412	0.371624	-0.405901	0.433328	0.958093	P57682	Krueppel-like factor 3	KLF3	PSVIVQPGKRPLPVESPDTQRKRRIHRCDYD	250
1.39917	-0.80953	0.820784	-2.15243	1.07345	-0.645406	0.643942	-2.32926	0.721116	-0.480646	0.484199	-1.29802	0.998658	P57740	Nuclear pore complex protein Nup107	NUP107	_____MDRSGFGEISSPVIREAEVTRTARKQ	11
1.26983	-0.975733	0.986987	-1.81136	1.11159	-0.881523	0.880058	-2.10664	1.05875	-0.759952	0.763505	-2.13206	1	P58107	Epiplakin	EPPK1	LAQAQAQARAEAEAGSPRPDPREALRAATME	2508
-0.708504	0.70673	-0.700481	0.752246	-0.532144	0.488212	-0.489676	0.687661	-0.547902	0.638116	-0.463622	0.463622	0.997112	P60468	Protein transport protein Sec61 subunit beta	SEC61B	PGPTPSGTNVGSSGRSPSKAVAARAAGSTVR	17
-0.319762	0.594158	-0.0848314	0.0767462	-0.714929	0.0782469	-0.0797115	0.469824	-0.0749761	0.0771878	0.0801174	-1.45028	1	P60981	Destrin	DSTN	_____________MASGVQVADEVCRIFYDM	3
0.465396	-0.496424	0.440504	-0.448589	0.289676	-0.296826	0.626243	-0.339317	0.612106	-0.566086	0.569639	-0.804737	1	P61006	Ras-related protein Rab-8A	RAB8A	ARDIKAKMDKKLEGNSPQGSNQGVKITPDQQ	181
0.267699	-0.395524	0.41745	-0.288813	0.0893222	-0.283499	0.226774	-0.0868432	0.446066	-0.410553	0.414106	-0.483455	1	P61006	Ras-related protein Rab-8A	RAB8A	KAKMDKKLEGNSPQGSNQGVKITPDQQKRSS	185
0.260318	-0.282111	0.658756	-0.281432	0.213028	-0.400249	0.662496	-0.210549	-0.0892048	-0.547948	0.209645	0.0878635	1	P61247	40S ribosomal protein S3a	RPS3A	AKVERADGYEPPVQESV______________	263
0.263713	-0.203248	0.214502	-0.424384	0.222198	-0.149806	0.148342	-0.765031	0.212271	-0.21006	0.284772	-0.30648	1	P61978	Heterogeneous nuclear ribonucleoprotein K	HNRNPK	GGRPMPPSRRDYDDMSPRRGPPPPPPGRGGR	284
-0.176819	0.175045	-0.290004	0.485305	-0.220701	0.13805	-0.139515	0.23158	-0.0842825	0.139218	-0.510366	0.0829412	0.999999	P62070	Ras-related protein R-Ras2	RRAS2	LVRVIRKFQEQECPPSPEPTRKEKDKKGCHC	186
0.247867	-0.880096	0.988346	-0.26898	0.23653	-0.24368	1.12388	-0.942462	0.119349	-1.00601	0.897817	-0.12069	0.977352	P62263	40S ribosomal protein S14	RPS14	MKIGRIEDVTPIPSDSTRRKGGRRGRRL___	139
1.17231	-1.17408	1.37819	-1.55065	0.964772	-0.971922	1.35677	-2.0993	1.00277	-1.02209	1.08165	-1.00411	0.925063	P62491	Ras-related protein Rab-11A	RAB11A	IVSQKQMSDRRENDMSPSNNVVPIHVPPTTE	190
-2.35446	1.22135	-1.2101	1.57885	-2.53918	0.894636	-0.896101	1.44608	-1.93406	0.91929	-0.915737	1.69276	0.997994	P62857	40S ribosomal protein S28	RPS28	PIKLARVTKVLGRTGSQGQCTQVRVEFMDDT	23
0.121661	-0.521656	0.708815	-0.142774	0.185492	-0.5658	0.983723	-0.183013	0.122441	-0.427641	0.701161	-0.123782	0.999996	P62888	60S ribosomal protein L30	RPL30	______MVAAKKTKKSLESINSRLQLVMKSG	10
1.15995	-1.11788	1.12914	-1.87816	0.816141	-0.797746	0.796281	-3.14254	0.790294	-0.788082	1.34954	-2.7774	0.947791	P62995	Transformer-2 protein homolog beta	TRA2B	HTPTPGIYMGRPTYGSSRRRDYYDRGYDRGY	215
-0.387962	0.340718	-0.329464	0.461082	-0.245572	0.238422	-0.308229	0.631331	-0.387439	0.297266	-0.293713	0.468905	1	P63165	Small ubiquitin-related modifier 1	SUMO1	______________MSDQEAKPSTEDLGDKK	2
-0.757978	0.346075	-0.334821	0.526523	-0.639624	0.374144	-0.375608	0.742751	-0.56944	0.344874	-0.341321	0.702892	0.939586	P67809	Nuclease-sensitive element-binding protein 1	YBX1	DGKETKAADPPAENSSAPEAEQGGAE_____	314
-0.228957	0.227182	-0.217168	1.22349	-0.419697	0.412547	-0.83731	1.04351	-0.435572	0.437784	-0.452717	0.909716	0.998368	P67809	Nuclease-sensitive element-binding protein 1	YBX1	QQNYQNSESGEKNEGSESAPEGQAQQRRPYR	174
-0.393139	-0.00467549	0.0159296	0.480741	-0.556118	0.332003	-0.333468	0.622322	-0.527169	0.328636	-0.325083	0.579199	0.999264	P67809	Nuclease-sensitive element-binding protein 1	YBX1	NYQNSESGEKNEGSESAPEGQAQQRRPYRRR	176
-0.748239	0.665663	-0.654409	1.46168	-0.698503	0.649625	-0.651089	1.65664	-0.784369	0.786581	-0.868565	1.32659	0.999774	P67809	Nuclease-sensitive element-binding protein 1	YBX1	RRRGPPRNYQQNYQNSESGEKNEGSESAPEG	165
-0.474199	0.472425	-0.66387	1.23709	-0.656942	0.649792	-0.928563	1.22764	-0.780915	0.748163	-0.74461	1.34221	0.985837	P67809	Nuclease-sensitive element-binding protein 1	YBX1	RGPPRNYQQNYQNSESGEKNEGSESAPEGQA	167
-0.215575	-0.627092	0.205156	0.737328	-0.128483	0.025109	-0.0265736	0.632122	-0.659746	-0.142197	0.14575	0.817141	0.999968	P67809	Nuclease-sensitive element-binding protein 1	YBX1	PPYYMRRPYGRRPQYSNPPVQGEVMEGADNQ	209
1.74272	-1.74449	2.8468	-2.31988	1.54055	-1.5477	2.29122	-2.62171	0.89197	-0.967669	2.43313	-0.893311	0.999998	Q71DI3	Histone H3.2;Histone H3.1t;Histone H3.1;Histone H3	HIST2H3A;HIST3H3;HIST1H3A;HIST2H3PS2	GKAPRKQLATKAARKSAPATGGVKKPHRYRP	29
-0.264229	0.262218	-0.209979	0.201894	0.131024	-0.103877	0.102413	-0.480157	0.170775	-0.168563	0.782578	-0.856263	0.931734	P78312	Protein FAM193A	FAM193A	HIKDEKSNPTPMEPTSPGEHQQNSKLVLAES	1129
0.140321	0.739344	-0.150739	-0.252358	0.0547037	0.709792	-0.311721	-0.0522247	0.0122838	0.626635	-0.195972	-0.0136251	0.999943	P78316	Nucleolar protein 14	NOP14	NVFRDKRFGEYNSNMSPEEKMMKRFALEQQR	96
-0.268614	0.26684	-0.577633	0.37949	-0.285149	0.277999	-0.414811	0.593985	-0.258408	0.260619	-0.543746	0.408408	1	P78332	RNA-binding protein 6	RBM6	KGRGNDRREKLQSFDSPERKRIKYSRETDSD	1025
0.326208	-0.510632	0.428792	-0.347321	0.10382	-0.964197	0.165507	-0.101341	0.71288	-0.750065	0.843402	-0.714222	0.998886	P78344	Eukaryotic translation initiation factor 4 gamma 2	EIF4G2	ESAIAEGGASRFSASSGGGGSRGAPQHYPKT	17
-0.423691	0.404863	-0.393608	0.510748	-0.22192	0.21477	-0.325538	0.617909	-0.301376	0.303588	-0.380547	0.520506	0.999826	P78347	General transcription factor II-I	GTF2I	PEMFETAIKESTSSKSPPRKINSSPNVNTTA	823
0.493877	-0.790836	0.392441	-0.400526	0.85667	-0.806996	0.805531	-1.25819	0.494409	-0.828485	-0.18946	0.18946	0.993636	P78347	General transcription factor II-I	GTF2I	VGGRVMVTDADRSILSPGGSCGPIKVKTEPT	210
-0.402056	0.400282	-0.419953	0.87252	-0.527248	0.520098	-0.569227	0.977845	-0.448667	0.402872	-0.399319	0.60942	0.999964	P78347	General transcription factor II-I	GTF2I	SKINTKALQSPKRPRSPGSNSKVPEIEVTVE	674
0.584196	-0.548974	0.560228	-2.16077	0.302637	-0.309787	0.540092	-3.32659	0.282224	-0.269543	0.273096	-2.65508	0.969763	P78356	Phosphatidylinositol 5-phosphate 4-kinase type-2 beta	PIP4K2B	SSNCTSTTAVAVAPLSASKTKTKKKHFVCQK	17
-0.629856	0.248393	-0.237139	0.683002	-0.187636	0.0943787	-0.0958433	0.743191	-0.374301	0.125196	-0.121643	0.451571	0.885357	P78362	SRSF protein kinase 2;SRSF protein kinase 2 N-terminal;SRSF protein kinase 2 C-terminal	SRPK2	______MSVNSEKSSSSERPEPQQKAPLVPP	10
-0.552373	-0.969532	2.41136	0.53126	-0.552975	-0.26225	1.49483	0.255178	-0.789414	-0.245874	0.935197	0.250355	0.99999	P78527	DNA-dependent protein kinase catalytic subunit	PRKDC	LSKIEEKLTPLPEDNSMNVDQDGDPSDRMEV	3205
-0.428548	1.51966	-0.426317	0.407435	-1.54054	0.36548	-0.366945	0.405687	-0.229168	0.378997	-0.416355	0.227827	0.99353	P78527	DNA-dependent protein kinase catalytic subunit	PRKDC	FRSTVLTPMFVETQASQGTLQTRTQEGSLSA	2612
0.148739	0.0483033	-0.0370492	-0.325044	0.117306	-0.000396151	-0.00106845	-0.334791	0.208877	0.0168843	-0.0133312	-0.328506	1	P78563	Double-stranded RNA-specific editase 1	ADARB1	SSSTDVKENRNLDNVSPKDGSTPGPGEGSQL	26
-0.209657	0.207883	-0.548548	0.403879	-0.226406	0.274486	-0.804487	0.228885	-0.0174227	0.376728	-0.383817	0.0160814	0.998265	P82094	TATA element modulatory factor	TMF1	FSVQSLDSRSVSEINSDDELSGKGYALVPII	344
-1.60199	0.30133	-0.290076	0.774099	-0.547786	0.291884	0.0257031	-0.0175389	-0.0631521	0.0051316	-0.00157853	0.41775	0.996717	P84101	Small EDRK-rich factor 2	SERF2	QRELARQKNMKKQSDSVKGKRRDDGLSAAAR	21
1.5732	-1.44749	1.45875	-2.01807	1.56188	-1.06212	1.06065	-2.53699	0.815438	-0.813226	1.34097	-1.43792	0.999995	P84243	Histone H3.3	H3F3A	GKAPRKQLATKAARKSAPSTGGVKKPHRYRP	29
-0.0330492	-0.676604	0.0226307	0.298201	-0.216768	-0.209166	0.207702	0.742848	-0.203079	-0.441722	0.200809	0.558852	1	P85037	Forkhead box protein K1	FOXK1	AAPALVAAAAASVRQSPGPALARLEGREFEF	101
-0.411347	0.409573	-0.575007	0.500019	-0.430345	0.423195	-0.537995	0.644319	-0.384509	0.386721	-0.512938	0.543223	1	P98175	RNA-binding protein 10	RBM10	HTSMDLPKLASDDRPSPPRGLVAAYSGESDS	723
0.769481	-0.771255	1.20952	-1.39313	0.862883	-0.870033	1.56766	-1.80438	0.820483	-0.818271	1.43105	-1.50731	1	Q00059	Transcription factor A, mitochondrial	TFAM	YNVYVAERFQEAKGDSPQEKLKTVKENWKNL	177
0.105727	-0.429412	0.174304	-0.12684	0.144441	-0.227406	0.0815948	-0.0734305	0.203052	-0.29481	0.114806	-0.114806	0.992323	Q00587	Cdc42 effector protein 1	CDC42EP1	PNGVTAGLGPVAEVKSSPVGGGPRGPAGPAL	302
0.288015	-0.417375	1.75296	-0.309129	-0.0724874	-0.749222	0.934233	0.0749664	0.07339	-0.19424	0.848476	-0.0747313	1	Q00839	Heterogeneous nuclear ribonucleoprotein U	HNRNPU	DEEAGGRPAMEPGNGSLDLGGDSAGRSGAGL	59
-0.333117	0.523992	-0.341494	0.312003	-0.315048	0.544456	-0.336474	0.317527	-0.151148	0.417013	-0.285612	0.149807	0.990324	Q00839	Heterogeneous nuclear ribonucleoprotein U	HNRNPU	____________MSSSPVNVKKLKVSELKEE	4
0.438212	-0.1968	0.208054	-0.317162	0.353412	-0.221696	0.220232	-0.593034	0.3977	-0.306007	0.30956	-0.966917	1	Q01082	Spectrin beta chain, non-erythrocytic 1	SPTBN1	KGEQVSQNGLPAEQGSPRMAETVDTSEMVNG	2138
-0.0538488	0.192932	0.0434303	-0.244691	-0.164316	0.157166	-0.206531	0.470114	0.0706666	-0.164935	0.103387	-0.0720079	1	Q01105	Protein SET	SET	_________MAPKRQSPLPPQKKKPRPPPAL	7
-0.14107	0.139296	-0.180822	0.951765	-0.0566602	-0.26889	0.0647462	0.517618	-0.137162	-0.181766	0.134893	0.310322	0.998758	Q01105	Protein SET;Protein SETSIP	SET;SETSIP	STEIKWKSGKDLTKRSSQTQNKASRKRQHEE	183
-0.185477	0.183703	-0.304868	0.891159	0.194569	-0.201719	-0.417455	0.487913	-0.17814	0.180351	-0.21501	0.76348	0.985569	Q01105	Protein SET;Protein SETSIP	SET;SETSIP	TEIKWKSGKDLTKRSSQTQNKASRKRQHEEP	184
0.380899	-0.382673	0.603387	-0.479541	0.111189	-0.118339	0.862588	-0.359458	0.205264	-0.531113	0.424163	-0.206605	0.962705	Q01130	Serine/arginine-rich splicing factor 2	SRSF2	EGMTSLKVDNLTYRTSPDTLRRVFEKYGRVG	26
-1.29298	0.561045	-0.549791	1.17182	-1.47878	0.379046	-0.380511	0.726762	-0.550784	0.554202	-0.783796	0.549443	1	Q01433	AMP deaminase 2	AMPD2	IEQLEERRQRLERQISQDVKLEPDILLRAKQ	168
1.3163	-1.21405	1.22531	-2.31591	1.19029	-1.11761	1.11614	-3.25411	0.859876	-0.755243	0.758796	-1.43879	0.998081	Q01518	Adenylyl cyclase-associated protein 1	CAP1	EAVSHTSDMHRGYADSPSKAGAAPYVQAFDS	34
-1.15424	1.15246	-1.24045	1.23555	-1.4667	1.35017	-1.35163	1.58518	-1.48983	1.67315	-1.45593	1.45593	0.953542	Q01518	Adenylyl cyclase-associated protein 1	CAP1	VRSGPKPFSAPKPQTSPSPKRATKKEPAVLE	308
-0.683923	0.11646	0.211701	-0.115901	-0.0919973	-0.232277	0.570295	0.0944762	-0.24161	-0.195364	0.346629	0.199845	0.999999	Q01650	Large neutral amino acids transporter small subunit 1	SLC7A5	EEAREKMLAAKSADGSAPAGEGEGVTLQRNI	35
-0.372939	0.371165	-0.431312	0.621291	-0.517259	0.510109	-0.583674	0.821011	-0.47385	0.524561	-0.50257	0.472509	1	Q02040	A-kinase anchor protein 17A	AKAP17A	CKEVQSSCRVVPEDGSPEKRCPGGVLSCIPD	537
-0.225156	0.456746	-0.289569	0.204043	-0.516288	0.532212	-0.198687	0.206851	-0.239711	0.410703	-0.036519	0.036519	1	Q02241	Kinesin-like protein KIF23	KIF23	GQSVQFTDIETLKQESPNGSRKRRSSTVAPA	902
0.845209	-0.522693	-0.0492428	0.0411576	0.835873	-0.420832	0.0326932	-0.0245289	1.29222	-0.400143	-0.190372	0.190372	0.984293	Q02790	Peptidyl-prolyl cis-trans isomerase FKBP4;Peptidyl-prolyl cis-trans isomerase FKBP4, N-terminally processed	FKBP4	TEMKEEQKSNTAGSQSQVETEA_________	453
-0.433751	0.431977	-0.446344	0.799744	-0.606643	0.470295	-0.47176	0.846103	-0.295249	0.214765	-0.211212	0.528135	0.997147	Q02880	DNA topoisomerase 2-beta	TOP2B	PKGKGRGAKKRKASGSENEGDYNPGRKTSKT	1552
-0.213789	0.519337	-0.299843	0.192675	-0.156673	0.485472	-0.478359	0.159152	-0.162569	0.513074	-0.377337	0.161228	0.972744	Q03111	Protein ENL	MLLT1	KEPKMALKETKLESTSPKGGPPPPPPPPPRA	267
0.333162	-0.26628	0.277534	-1.24158	-0.278608	0.193473	-0.194937	0.472376	0.0743854	-0.0721736	0.171395	-0.469427	0.998996	Q03164	Histone-lysine N-methyltransferase 2A;MLL cleavage product N320;MLL cleavage product C180	KMT2A	LPLELPSDLSVLTTRSPTVPSQNPSRLAVIS	2938
0.0239446	-0.0257187	-0.366651	0.131853	-0.188669	0.0775169	0.0976204	-0.0845885	0.0266519	-0.0244401	-0.0750964	0.454704	0.853639	Q03164	Histone-lysine N-methyltransferase 2A;MLL cleavage product N320;MLL cleavage product C180	KMT2A	PPTPPILSTDRSREDSPELNPPPGIEDNRQC	1858
1.23353	-1.2353	1.41802	-1.46087	0.996302	-1.00345	1.2496	-1.99069	0.570446	-0.568234	0.651467	-0.779039	0.962828	Q03252	Lamin-B2	LMNB2	SPSSRVTVSRATSSSSGSLSATGRLGRSKRK	422
0.841848	-1.43418	1.05928	-0.862962	0.566962	-0.574112	0.963848	-0.648104	0.79116	-0.996573	1.08751	-0.792502	0.999989	Q03252	Lamin-B2	LMNB2	RVTVSRATSSSSGSLSATGRLGRSKRKRLEV	426
0.267337	-0.139369	0.144074	-0.152159	0.304026	-0.181574	0.18011	-2.06011	0.168396	-0.133651	0.137204	-2.03089	1	Q03468	DNA excision repair protein ERCC-6	ERCC6	CTTSLRQINKIIEQLSPQAATSRDINRKLDS	158
-0.64487	0.643096	-0.660771	0.669308	-0.704812	0.56336	-0.564824	0.876076	-0.545888	0.5481	-0.635312	0.577128	0.999989	Q03701	CCAAT/enhancer-binding protein zeta	CEBPZ	KAKPGLRSQLDDHPESDDEENFIDANDDEDM	629
0.193809	-0.156891	0.135353	-0.143439	0.0313028	-0.0384528	0.0655178	-0.145066	0.163464	-0.161252	0.198615	-0.409192	1	Q04637	Eukaryotic translation initiation factor 4 gamma 1	EIF4G1	RGRDAVKREAALPPVSPLKAALSEEELEKKS	1231
-0.000249714	0.200987	-0.0176897	-0.0208637	-0.559231	0.466452	-0.467916	0.818001	-0.150122	0.0832284	-0.0796753	0.149075	1	Q04637	Eukaryotic translation initiation factor 4 gamma 1	EIF4G1	RGDRLDRARTPATKRSFSKEVEERSRERPSQ	1185
-1.32999	1.32822	-1.3513	1.96796	0.00184856	-0.00899849	-0.748825	0.09628	-1.13792	1.00791	-1.00436	1.52291	0.999995	Q04637	Eukaryotic translation initiation factor 4 gamma 1	EIF4G1	TESTDNRRVVQRSSLSRERGEKAGDRGDRLE	1147
0.482923	-0.484697	0.727499	-0.920846	0.334932	-0.342081	0.354464	-0.908431	0.529849	-0.527637	0.773565	-0.727293	0.976779	Q04656	Copper-transporting ATPase 1	ATP7A	LYRVSITSEVESTSNSPSSSSLQKIPLNVVS	357
-2.51201	1.57524	-1.56398	1.71333	-2.43822	1.44879	-1.45026	1.85352	-1.5973	1.19736	-1.1938	1.3794	0.929408	Q04726	Transducin-like enhancer protein 3	TLE3	NGLDKARSLKKDAPTSPASVASSSSTPSSKT	286
-0.099847	0.0423554	-0.0311013	0.218216	-0.048339	-0.265756	0.475614	0.0508179	-0.0734695	0.146133	-0.124054	0.0721282	0.999987	Q04726	Transducin-like enhancer protein 3	TLE3	ELDHRERESSANNSVSPSESLRASEKHRGSA	203
-0.294955	0.293181	-1.29556	0.545685	-0.645416	0.638266	-0.917122	0.907478	-0.429459	0.431671	-1.37295	0.76732	0.96564	Q05086	Ubiquitin-protein ligase E3A	UBE3A	MEEDSEASSSRIGDSSQGDNNLQKLGPDDVS	218
1.18214	-1.1834	1.19465	-1.87429	1.11757	-1.12472	1.3035	-1.69975	0.915499	-0.656159	0.659712	-0.814734	0.940826	Q05209	Tyrosine-protein phosphatase non-receptor type 12	PTPN12	NTLLNRGHAIKIKSASPCIADKISKPQELSS	468
-0.484862	0.483088	-0.472514	0.661438	-0.417446	0.410296	-0.647833	0.923263	-0.560258	0.423646	-0.420093	0.710106	1	Q05519	Serine/arginine-rich splicing factor 11	SRSF11	SKVNGDDHHEEDMDMSD______________	483
0.605399	-0.737577	0.607394	-0.615479	0.556075	-0.777731	0.538113	-0.529949	0.573615	-1.05187	0.959306	-0.574957	0.999989	Q05D32	CTD small phosphatase-like protein 2	CTDSPL2	_______MRLRTRKASQQSNQIQTQRTARAK	9
0.324999	0.0818567	-0.0706026	-2.50119	0.164913	0.229017	-0.156827	-2.32967	0.25088	-0.187291	0.190844	-0.971923	0.999999	Q05D32	CTD small phosphatase-like protein 2	CTDSPL2	HVKQNGKLEDNPSSGSPPRTTLLGTIFSPVF	134
0.987614	-0.460495	0.471749	-0.937536	1.06446	-0.399032	0.397568	-0.855019	0.85665	-0.488533	0.492086	-1.12049	0.998405	Q05D32	CTD small phosphatase-like protein 2	CTDSPL2	NFFSPANKNGTSGSDSPGQAVEAEEIVKQLD	165
-0.268042	0.214975	-0.203721	0.572849	0.32012	0.181941	-0.853171	-0.189012	-0.391678	0.393889	-0.724018	0.419393	0.920596	Q06210	Glutamine--fructose-6-phosphate aminotransferase [isomerizing] 1	GFPT1	RGKDKKGSCNLSRVDSTTCLFPVEEKAVEYY	261
0.778247	-0.620091	0.631345	-1.94898	0.607845	-0.443356	0.441891	-1.67461	0.202009	-0.339427	0.111561	-0.111561	0.870025	Q06546	GA-binding protein alpha chain	GABPA	AAKVQRAPRISGEDRSSPGNRTGNNGQIQLW	308
0.771727	-0.615806	0.62706	-1.99028	0.603411	-0.485717	0.484252	-1.41104	0.658204	-0.443419	0.446972	-0.973669	0.941359	Q06546	GA-binding protein alpha chain	GABPA	AKVQRAPRISGEDRSSPGNRTGNNGQIQLWQ	309
0.855606	-0.583335	0.56943	-0.577515	0.325971	-0.24544	0.00571145	0.00245284	0.91894	-0.754414	0.72496	-0.72496	0.864322	Q06587	E3 ubiquitin-protein ligase RING1	RING1	GPAPKRPRGGGAGGSSVGTGGGGTGGVGGGA	212
-0.652958	0.476177	-0.464923	0.713346	-0.493583	0.261357	-0.262822	0.683461	-0.455249	0.435806	-0.432253	0.764881	0.992374	Q06587	E3 ubiquitin-protein ligase RING1	RING1	GTGGGGTGGVGGGAGSEDSGDRGGTLGGGTL	229
0.149463	-0.160057	0.208433	-0.170576	0.28247	-0.79176	0.364364	-0.279991	0.386418	-0.546585	0.465942	-0.387759	0.999757	Q07065	Cytoskeleton-associated protein 4	CKAP4	PSAKQRGSKGGHGAASPSEKGAHPSGGADDV	17
0.800876	0.0631729	-0.0519188	-0.14844	0.985746	0.0378899	-0.0393545	-0.20614	0.946705	-0.0946932	0.0982463	-0.199961	0.999768	Q07157	Tight junction protein ZO-1	TJP1	WRFRGLRSSKRNLRKSREDLSAQPVQTKFPA	617
-0.313722	0.311948	-0.308333	0.363061	-0.503252	0.398443	-0.399907	0.634244	-0.250842	0.253053	-0.27143	0.275592	0.999601	Q07955	Serine/arginine-rich splicing factor 1	SRSF1	EGETAYIRVKVDGPRSPSYGRSRSRSRSRSR	199
-0.960137	0.427488	-0.416234	0.683839	-1.54656	0.348726	-0.35019	0.850265	-0.411593	0.413805	-0.476069	0.923878	1	Q08117	Amino-terminal enhancer of split	AES	NGHDGDTHQEDDGEKSD______________	196
-0.894103	0.869419	-0.858165	1.07672	-0.714253	0.707103	-0.898502	1.12136	-0.842006	0.844217	-0.931712	0.96302	1	Q08170	Serine/arginine-rich splicing factor 4	SRSF4	EHAKSESSQREGRGESENAGTNQETRSRSRS	431
-1.10934	1.10757	-1.448	3.15155	-1.00114	0.993994	-2.8402	2.02231	-1.77985	1.64841	-1.64486	2.84397	1	Q08211	ATP-dependent RNA helicase A	DHX9	VPVALNIGKLAQFEPSQRQNQVGVVPWSPPQ	321
1.41436	-1.27276	1.28402	-1.50157	1.2176	-1.12213	1.12066	-2.36267	1.08178	-0.936465	0.940018	-1.25966	0.99999	Q08379	Golgin subfamily A member 2	GOLGA2	LAAAKKKLREYQQRNSPGVPTGAKKKKKIKN	37
0.739036	-0.726902	0.738156	-1.1959	0.620663	-0.627813	0.658715	-0.966722	0.701787	-0.610068	0.613621	-1.26901	0.997547	Q08499	cAMP-specific 3',5'-cyclic phosphodiesterase 4D	PDE4D	ISNTFLDKQHEVEIPSPTQKEKEKKKRPMSQ	348
1.25596	-1.25774	1.47343	-2.16887	0.655886	-0.663036	1.08876	-0.691404	0.174608	-0.0766257	0.0801788	-0.286214	1	Q08499	cAMP-specific 3',5'-cyclic phosphodiesterase 4D	PDE4D	FAALTNLQDRAPSKRSPMCNQPSINKATITE	255
1.35162	-1.35339	1.78364	-2.66273	0.673336	-0.680486	1.08484	-1.258	1.0707	-1.06849	1.67218	-2.00066	0.967043	Q08752	Peptidyl-prolyl cis-trans isomerase D	PPID	______________MSHPSPQAKPSNPSNPR	2
-0.566332	0.455689	-0.444435	0.816896	-0.674083	0.471005	-0.472469	0.915546	-0.327927	0.330138	-0.536144	0.946048	1	Q08945	FACT complex subunit SSRP1	SSRP1	GLKEGMNPSYDEYADSDEDQHDAYLERMKEE	444
-2.29359	-0.736966	2.0959	0.737526	1.67184	-1.12694	1.10209	-1.09393	-1.7693	-0.36264	2.0135	0.367121	0.991588	Q08945	FACT complex subunit SSRP1	SSRP1	SRGSSSKSSSRQLSESFKSKEFVSSDESSSG	659
0.84217	-0.45874	0.469994	-1.05883	0.97921	-0.510507	0.509042	-1.15856	0.255319	-0.55658	-0.257588	0.472499	0.993796	Q08AD1	Calmodulin-regulated spectrin-associated protein 2	CAMSAP2	QEMSILNSNIKLNQSSPDNVTDTKGALSPIT	599
0.571798	-0.273286	0.28454	-1.03588	0.441431	-0.0264671	0.0250025	-0.746844	0.420593	-0.172353	0.175907	-0.66208	0.999933	Q08AD1	Calmodulin-regulated spectrin-associated protein 2	CAMSAP2	SGKRTPRSESVEGFLSPSRCGSRNGEKDWEN	1319
-0.306911	0.305137	-0.363491	0.593616	-0.482891	0.475741	-0.559039	0.485602	-0.359724	0.361936	-0.54795	0.470869	1	Q08J23	tRNA (cytosine(34)-C(5))-methyltransferase	NSUN2	PDNDVTEGQRAGEPNSPDAEEANSPDVTAGC	743
-0.154044	0.15227	-0.438772	0.599203	-0.274418	0.267268	-0.354227	0.533281	-0.385944	0.505852	-0.336318	0.336318	0.999942	Q08J23	tRNA (cytosine(34)-C(5))-methyltransferase	NSUN2	QRAGEPNSPDAEEANSPDVTAGCDPAGVHPP	751
0.3725	-0.562309	0.351227	-0.359312	0.161466	-0.168616	0.450409	-0.296047	0.406275	-0.406827	0.303957	-0.303957	0.946744	Q08J23	tRNA (cytosine(34)-C(5))-methyltransferase	NSUN2	EKKKEGVILTNESAASTGQPDNDVTEGQRAG	724
-0.459139	0.303254	-0.292	1.54171	-0.577878	0.334144	-0.335608	1.6115	-0.371301	0.373513	-0.415026	1.47602	1	Q08J23	tRNA (cytosine(34)-C(5))-methyltransferase	NSUN2	MKVINTGIKVWCRNNSGEEFDCAFRLAQEGI	593
-0.011786	-0.485467	0.122621	-0.00932745	0.1553	-0.209228	0.0421957	-0.0340314	-0.0134707	-0.291404	0.148199	0.0121294	1	Q09161	Nuclear cap-binding protein subunit 1	NCBP1	_________MSRRRHSDENDGGQPHKRRKTS	7
1.25384	-1.14078	1.15204	-1.2564	0.508346	-0.531255	0.889343	-0.505868	0.304927	-0.302715	0.372327	-0.95353	1	Q09472	Histone acetyltransferase p300	EP300	____MAENVVEPGPPSAKRPKLSSPALSASA	12
0.36911	-0.370884	0.652204	-0.895479	0.451646	-0.458796	0.538021	-0.558334	-0.00619798	-0.391567	0.345751	0.00485667	0.999881	Q09472	Histone acetyltransferase p300	EP300	GLDDESNNQQAAATQSPGDSRRLSIQRCIQS	1726
1.16866	-1.08706	1.09831	-1.36789	1.05999	-0.838185	0.836721	-1.0248	0.984171	-0.670722	0.674275	-0.800147	1	Q09472	Histone acetyltransferase p300	EP300	PQVQAKNQQNQQPGQSPQGMRPMSNMSASPM	499
-0.0354965	0.275667	0.025078	-0.165121	-0.089619	0.136704	-0.189734	0.092098	0.0221346	0.32692	-0.0269708	-0.0234759	0.996883	Q09666	Neuroblast differentiation-associated protein AHNAK	AHNAK	ASLGSLEGEAEAEASSPKGKFSLFKSKKPRH	5763
0.498355	-0.493832	0.292553	-0.300638	0.93836	-0.813726	0.656942	-0.648777	0.577235	-0.610446	0.200943	-0.200943	1	Q09666	Neuroblast differentiation-associated protein AHNAK	AHNAK	AQRDDGVFVQEVTQNSPAARTGVVKEGDQIV	41
0.169214	-0.0407524	0.0520065	-0.718307	0.223006	-0.054453	0.0529884	-0.749522	0.192153	-0.117789	0.121342	-0.764104	0.989939	Q09666	Neuroblast differentiation-associated protein AHNAK	AHNAK	VDVTGREGAKDIDISSPEFKIKIPRHELTEI	177
-0.256515	0.342107	-0.224089	0.216004	-0.250982	0.358901	0.00992583	-0.00176153	-0.225352	0.140038	-0.0673123	0.0673123	0.997387	Q09666	Neuroblast differentiation-associated protein AHNAK	AHNAK	KFNFSKPKGKGGVTGSPEASISGSKGDLKSS	5731
-0.481817	0.480043	-0.507709	0.538761	-0.303976	0.296826	-0.327702	0.78566	-0.185302	0.187513	-0.213915	0.203165	0.99996	Q09666	Neuroblast differentiation-associated protein AHNAK	AHNAK	GGLGSKSKGHYEVTGSDDETGKLQGSGVSLA	5841
1.07622	-0.928145	0.939399	-2.59651	0.844632	-0.776447	0.774983	-1.4802	1.14914	-0.99977	1.00332	-1.53671	0.999753	Q09666	Neuroblast differentiation-associated protein AHNAK	AHNAK	QKPKISMQDVDLSLGSPKLKGDIKVSAPGVQ	511
0.0496998	0.540476	-0.0601183	-0.380701	0.0687644	0.678609	-0.0606784	-0.250295	0.0816082	0.512709	-0.0838776	-0.308967	0.976172	Q09666	Neuroblast differentiation-associated protein AHNAK	AHNAK	ETPNLEGTLTGPRLGSPSGKTGTCRISMSEV	559
-1.42156	1.25815	-1.2469	1.65949	-2.69961	1.73287	-1.73434	2.13426	-1.99425	1.46546	-1.46191	1.49703	0.999345	Q09666	Neuroblast differentiation-associated protein AHNAK	AHNAK	VDVETQSGKTVIRLPSGSGAASPTGSAVDIR	210
0.637937	-0.444035	0.455289	-0.52156	0.624183	-0.224365	0.2229	-0.312043	0.723253	-0.389479	0.389277	-0.389277	0.998721	Q09666	Neuroblast differentiation-associated protein AHNAK	AHNAK	SGKTVIRLPSGSGAASPTGSAVDIRAGAISA	216
0.658623	-0.318506	0.32976	-0.772218	0.835556	-0.0126065	0.0111419	-0.170719	0.710975	-0.398055	0.401608	-0.767565	0.973346	Q09666	Neuroblast differentiation-associated protein AHNAK	AHNAK	LQGSGVSLASKKSRLSSSSSNDSGNKVGIQL	5863
-0.755996	1.05825	-0.701428	0.693343	-0.588293	0.935305	-0.469757	0.477921	0.168701	0.83934	-0.300269	-0.170042	0.997017	Q09666	Neuroblast differentiation-associated protein AHNAK	AHNAK	QGSGVSLASKKSRLSSSSSNDSGNKVGIQLP	5864
-0.211587	0.209813	-0.372493	0.441102	-0.325274	0.318124	-0.577823	0.446972	-0.306153	0.311374	-0.536086	0.304812	1	Q0JRZ9	F-BAR domain only protein 2	FCHO2	PAISRHSPVQMNRNLSNEELTKSKPSAPPNE	403
-0.80107	0.799296	-0.887765	1.26054	-0.871351	0.864201	-0.897248	1.06136	-1.26917	0.961191	-0.957638	1.25826	0.999971	Q12778	Forkhead box protein O1	FOXO1	PEGGKSGKSPRRRAASMDNNSKFAKSRSRAA	256
0.84452	-0.474787	0.486041	-0.833376	0.781801	-0.347649	0.346184	-1.12851	0.907165	-0.529629	0.533182	-0.779506	0.999998	Q12778	Forkhead box protein O1	FOXO1	KKKASLQSGQEGAGDSPGSQFSKWPASPGSH	287
-0.501873	0.677954	-0.987295	0.48076	-0.726768	0.524306	-0.523744	0.531908	-0.551332	0.824808	-0.670383	0.54999	0.81055	Q12789	General transcription factor 3C polypeptide 1	GTF3C1	GSSSEDSPPEGQAPPSHSPRGTKRRASWASE	1854
-0.737567	0.89395	-0.944704	0.716453	-0.904107	0.918726	-1.17892	0.906586	-0.598659	0.736704	-0.981211	0.597318	0.975169	Q12789	General transcription factor 3C polypeptide 1	GTF3C1	SSEDSPPEGQAPPSHSPRGTKRRASWASENG	1856
-1.28166	-1.3448	1.28169	1.26055	-1.42187	-1.71619	1.42996	1.68776	-1.57684	-1.21452	1.36307	1.219	0.996526	Q12789	General transcription factor 3C polypeptide 1	GTF3C1	EEDSQGKEGPSGSGDSQLSASSRSESGRMKK	751
-0.220696	0.512082	-0.598957	0.199582	-0.416689	0.411922	-0.819269	0.419168	-0.204117	0.206329	-0.772564	0.313188	1	Q12789	General transcription factor 3C polypeptide 1	GTF3C1	VRCPRVRKNSSTDQGSDEEGSLQKEQESAMD	1068
0.293532	-0.106361	0.117615	-0.373019	0.416435	-0.533061	0.584706	-0.413956	1.77514	-1.51932	1.35908	-1.35908	0.904123	Q12797	Aspartyl/asparaginyl beta-hydroxylase	ASPH	SSSGSGSGSTSAGSSSPGARRETKHGGHKNG	29
0.520017	-0.230861	0.242115	-0.400676	0.240011	-0.247161	0.295057	-0.572525	0.483346	-0.240137	0.24369	-0.514362	1	Q12830	Nucleosome-remodeling factor subunit BPTF	BPTF	KAKEGCQSDSMRQEQSPNANNDQPEDLIQGC	1251
-0.611242	-0.171155	0.182409	0.403649	-1.02977	-0.431537	0.430072	0.634212	-0.46323	-0.176944	0.394633	0.181425	1	Q12830	Nucleosome-remodeling factor subunit BPTF	BPTF	DVSIRSPETKCPKQNSIENDIEEKVSDLASR	1310
0.0393081	0.349964	-0.0497266	-0.629109	0.0220374	0.229651	-0.0139514	-0.483607	0.0417607	0.176035	-0.0440301	-0.415261	0.99994	Q12830	Nucleosome-remodeling factor subunit BPTF	BPTF	VGDFKSEKSNGELSESPGAGKGASGSTRIIT	763
0.868127	-0.748649	0.759903	-0.823677	1.4862	-1.24868	1.24722	-3.6222	1.11478	-0.906637	0.91019	-1.34995	0.995253	Q12830	Nucleosome-remodeling factor subunit BPTF	BPTF	SVTTGTKMVLTTKVGSPATVTFQQNKNFHQT	2098
-0.411801	0.681373	-0.570408	0.390688	-0.352795	0.552833	-0.460455	0.355274	-0.193494	0.675578	-0.357305	0.192153	0.977317	Q12830	Nucleosome-remodeling factor subunit BPTF	BPTF	QPQSNVQGQSPVRVQSPSQTRIRPSTPSQLS	2471
1.02946	-0.0104224	0.0216765	-1.25507	1.05609	0.152537	-0.154001	-1.14726	0.813917	0.330645	-0.327092	-1.09023	1	Q12834	Cell division cycle protein 20 homolog	CDC20	ARWQRKAKEAAGPAPSPMRAANRSHSAGRTP	41
-0.225727	-0.0680684	0.0793225	0.819442	-0.233	0.0654029	-0.0668675	0.123456	-0.509479	0.272812	-0.269259	0.458298	0.999989	Q12846	Syntaxin-4	STX4	KAIEPQKEEADENYNSVNTRMRKTQHGVLSQ	117
-0.119463	0.117689	-0.334305	0.103288	-0.233107	0.225957	-0.344561	0.411713	-0.146105	0.148317	-0.166455	0.260617	0.999999	Q12857	Nuclear factor 1 A-type	NFIA	TSSTKRLKSVEDEMDSPGEEPFYTGQGRSPG	287
0.894458	-0.896232	1.11906	-1.66258	0.539751	-0.5469	1.26589	-1.59478	0.994243	-0.992031	1.18108	-1.47667	0.999998	Q12857	Nuclear factor 1 A-type	NFIA	ESSSYYSMSPGAMRRSLPSTSSTSSTKRLKS	265
1.51575	-1.51752	1.77657	-2.70745	1.23787	-1.24502	1.27055	-2.77706	1.208	-1.20579	1.39906	-2.04102	1	Q12872	Splicing factor, suppressor of white-apricot homolog	SFSWAP	_MYGASGGRAKPERKSGAKEEAGPGGAGGGG	15
-0.354806	0.174464	-0.163209	0.394228	-0.325869	0.156223	-0.157687	0.453108	-0.253848	0.098483	-0.0949299	0.322562	0.996447	Q12873	Chromodomain-helicase-DNA-binding protein 3	CHD3	YKKKKKELQGDGPPSSPTNDPTVKYETQPRF	713
-0.589542	-1.2345	3.94275	0.568428	-0.172705	-0.336231	1.68323	0.175184	-0.610614	-0.566976	1.9896	0.571458	0.938909	Q12888	Tumor suppressor p53-binding protein 1	TP53BP1	DQELQQPQTQEKTSNSLTEDSKMANAKQLSS	862
-0.566884	0.56511	-2.65197	0.906424	-0.320646	0.313496	-1.48776	0.866378	-0.44964	0.451852	-2.75727	0.792868	0.999991	Q12888	Tumor suppressor p53-binding protein 1	TP53BP1	DEDGENTQIEDTEPMSPVLNSKFVPAENDSI	552
-0.33175	0.329976	-0.408473	0.76672	-0.379896	0.372746	-0.51684	0.627729	-0.3126	0.314812	-0.535707	0.701231	0.999997	Q12888	Tumor suppressor p53-binding protein 1	TP53BP1	GERKNGSTAVAESVASPQKTMSVLSCICEAR	1028
-1.692	0.561599	-0.550345	2.11955	-1.72034	0.623889	-0.625353	2.42149	-2.201	0.638947	-0.635394	1.92722	0.96207	Q12888	Tumor suppressor p53-binding protein 1	TP53BP1	LKSGTAETEPVEQDSSQPSLPLVRADDPLRL	831
-0.362463	0.360689	-0.523605	0.838805	-0.470627	0.463477	-0.711989	0.885975	-0.460854	0.463066	-0.641343	0.693526	0.972769	Q12888	Tumor suppressor p53-binding protein 1	TP53BP1	PSPDAFRSTPFIVPSSPTEQEGRQDKPMDTS	380
1.39194	-1.52895	1.40273	-1.41081	1.06889	-1.07604	1.11442	-1.28583	0.735472	-0.875054	0.747626	-0.736814	0.992881	Q12906	Interleukin enhancer-binding factor 3	ILF3	GGGGSDYNYESKFNYSGSGGRSGGNSYGSGG	810
0.757199	-1.35183	0.782208	-0.778312	0.907925	-0.846309	0.844844	-1.11059	0.984106	-0.988453	0.933761	-0.933761	0.999986	Q12906	Interleukin enhancer-binding factor 3	ILF3	GGSDYNYESKFNYSGSGGRSGGNSYGSGGAS	812
-0.645805	0.644031	-0.769229	0.937514	-0.591567	0.584417	-0.943094	0.851126	-0.590464	0.592676	-0.736432	0.72768	0.999962	Q12906	Interleukin enhancer-binding factor 3	ILF3	DWIDEQEKGSSEQAESDNMDVPPEDDSKEGA	62
-0.395885	0.477254	-0.343998	0.335912	-1.28979	0.883172	-0.884636	1.17379	-0.726785	0.504823	-0.50127	0.76693	0.998532	Q12906	Interleukin enhancer-binding factor 3	ILF3	ITPMKRPMEEDGEEKSPSKKKKKIQKKEEKA	382
1.21782	-1.02561	1.03686	-1.88518	0.749166	-0.650081	0.648616	-2.76916	0.822382	-0.838623	0.789464	-0.789464	1	Q12926	ELAV-like protein 2	ELAVL2	PSQKTNQAILSQLYQSPNRRYPGPLAQQAQR	221
0.634234	-0.26628	0.277534	-1.01104	0.0848631	-0.0920131	0.314591	-0.154286	0.242905	-0.133884	-0.0301965	0.0301965	0.990189	Q12986	Transcriptional repressor NF-X1	NFX1	DQEKCTVRRQDPQVVSPFSRGKQNHVLKNVE	326
-0.580989	0.559435	-0.548181	0.569795	-0.452594	0.311324	-0.312789	0.581906	-0.315329	0.31754	-0.578852	0.518079	1	Q12996	Cleavage stimulation factor subunit 3	CSTF3	SNAVLTKAVKRPNEDSDEDEEKGAVVPPVHD	691
-0.556364	0.204292	-0.193038	0.522773	-0.380555	0.0382671	-0.0397317	0.497415	-0.261508	0.0705405	-0.0669874	0.156239	1	Q13045	Protein flightless-1 homolog	FLII	KDPMARKMRLRRRKDSAQDDQAKQVLKGMSD	436
0.866735	-0.868509	1.58719	-1.10994	0.714957	-0.722107	1.66911	-1.2254	0.795762	-0.79355	1.4728	-0.930947	1	Q13045	Protein flightless-1 homolog	FLII	VLTVDYTRNAEAVLQSPGLSGKVKRDAEKKD	856
-0.504831	0.265038	-0.253783	0.405617	-0.596912	0.265081	-0.266546	0.448023	-0.194584	0.172442	-0.168889	0.767559	0.999999	Q13098	COP9 signalosome complex subunit 1	GPS1	VLRNQIHVKSPPREGSQGELTPANSQSRMST	474
0.0139876	0.562469	-0.212181	-0.0351011	-0.275375	0.268225	-0.298372	0.818407	-0.0286963	0.292434	0.0264269	-0.175801	0.999999	Q13098	COP9 signalosome complex subunit 1	GPS1	MMLRAAVLRNQIHVKSPPREGSQGELTPANS	468
-0.191647	0.298201	-0.113853	0.105768	-0.0639178	0.0567678	-0.36556	0.105369	-0.150922	0.113569	-0.110016	0.272948	0.996159	Q13111	Chromatin assembly factor 1 subunit A	CHAF1A	GGGVGVDTGKATLTASPLGAS__________	951
-0.248474	0.0997351	-0.088481	0.371315	-0.366481	0.344452	-0.345916	0.632411	-0.227135	0.229347	-0.326022	0.473763	0.999959	Q13111	Chromatin assembly factor 1 subunit A	CHAF1A	QPDSLVDHNKLNSEASPSREAINGQREDTGD	141
-1.27999	1.12759	-1.11633	1.17575	-1.40474	1.11385	-1.11531	1.37973	-0.740031	0.742242	-1.01608	0.898416	0.998953	Q13112	Chromatin assembly factor 1 subunit B	CHAF1B	PDTAKKTKSQTHRGSSPGPRPVEGTPASRTQ	410
1.89765	-1.74711	1.75836	-3.78652	1.60441	-1.39574	1.39427	-1.86946	1.42758	-1.33582	1.33937	-2.45419	0.998957	Q13112	Chromatin assembly factor 1 subunit B	CHAF1B	SPLPGPSEEKTLQPSSQNTKAHPSRRVTLNT	473
-2.39597	1.86913	-1.85787	3.09546	-0.488952	0.422024	-0.423489	1.96315	-2.42698	2.02098	-2.01742	3.30332	0.974904	Q13112	Chromatin assembly factor 1 subunit B	CHAF1B	RPVEGTPASRTQDPSSPGTTPPQARQAPAPT	429
-0.145161	0.143387	-0.518137	0.764732	-0.163019	0.155869	-0.74586	0.721095	-0.0930537	0.00210906	0.00144401	0.649127	1	Q13118	Krueppel-like factor 10	KLF10	PSSETVICRSQPAPVSPQQKSVLVSPPAVSA	249
0.0345484	0.334379	-0.421175	-0.0556618	-0.0551588	0.403659	-0.340762	0.0576378	-0.124781	0.707459	-0.549511	0.12344	0.992383	Q13129	Zinc finger protein Rlf	RLF	KKLLLKGSQKGICPKSPSAIPEQNHSLNDQA	632
-0.397856	-0.0164172	0.0276713	0.443426	-0.0746152	0.0674652	-0.701699	0.441456	-0.697305	0.0252513	-0.0216982	0.452261	0.977315	Q13131	5'-AMP-activated protein kinase catalytic subunit alpha-1	PRKAA1	RSGSVSNYRSCQRSDSDAEAQGKSSEVSLTS	508
0.05882	-0.0605941	-0.466237	0.6056	0.147366	-0.0724786	-0.104356	0.065407	0.0996274	0.0483985	-0.338783	-0.0439173	1	Q13177	Serine/threonine-protein kinase PAK 2;PAK-2p27;PAK-2p34	PAK2	______________MSDNGELEDKPPAPPVR	2
-0.279412	0.277638	-0.374596	0.304883	0.462812	-0.318959	0.317495	-1.01273	0.134514	-0.24978	0.18689	-0.135856	0.999837	Q13185	Chromobox protein homolog 3	CBX3	NSQKAGKEKDGTKRKSLSDSESDDSKSKKKR	93
-0.337271	0.306975	-0.295721	0.407547	-0.307855	0.300705	-0.511991	0.66227	-0.403446	0.372246	-0.368693	0.45234	0.991396	Q13185	Chromobox protein homolog 3	CBX3	QKAGKEKDGTKRKSLSDSESDDSKSKKKRDA	95
-0.95237	0.950596	-1.07734	1.3193	-0.676343	0.681382	-1.03804	0.678822	-0.942485	0.944697	-1.24296	1.17104	0.99917	Q13185	Chromobox protein homolog 3	CBX3	AGKEKDGTKRKSLSDSESDDSKSKKKRDAAD	97
-1.0195	1.18738	-1.51107	0.998391	-1.31208	1.1705	-1.17196	1.71132	-0.89533	0.897541	-1.34647	1.1627	0.977964	Q13185	Chromobox protein homolog 3	CBX3	KEKDGTKRKSLSDSESDDSKSKKKRDAADKP	99
0.789455	-0.263076	0.27433	-1.35829	0.62827	-0.143454	0.141989	-1.20277	0.510892	-0.297253	0.300807	-1.29533	0.928317	Q13188	Serine/threonine-protein kinase 3;Serine/threonine-protein kinase 3 36kDa subunit;Serine/threonine-protein kinase 3 20kDa subunit	STK3	EDEEEEDGTMKRNATSPQVQRPSFMDYFDKQ	385
0.614298	-0.616072	0.805242	-1.30666	0.574735	-0.581885	0.839424	-0.834638	0.636384	-0.740514	0.845294	-0.637726	1	Q13200	26S proteasome non-ATPase regulatory subunit 2	PSMD2	MEEGGRDKAPVQPQQSPAAAPGGTDEKPSGK	16
-0.352562	0.0856761	-0.0744221	0.435917	-0.221015	0.0472038	-0.0486684	0.510058	-0.345865	0.0864897	-0.0829366	0.486355	0.94592	Q13200	26S proteasome non-ATPase regulatory subunit 2	PSMD2	IYKTHLENNRFGGSGSQVDSARMNLASSFVN	363
-0.081543	0.269764	-0.572262	0.0604295	0.217301	0.839002	-0.209215	-0.931011	0.207759	0.457691	-0.210028	-0.387043	0.99329	Q13206	Probable ATP-dependent RNA helicase DDX10	DDX10	_________MGKTANSPGSGARPDPVRSFNR	7
0.771271	-0.395536	0.40679	-0.416904	0.429634	-0.329716	0.328252	-0.405776	-0.0173445	0.312791	0.015075	-0.190757	0.9996	Q13233	Mitogen-activated protein kinase kinase kinase 1	MAP3K1	KHRLQGFIPCRIPSASPQTQRKFSLQFHRNC	1018
-0.342496	0.244938	-0.233684	0.317092	-0.211786	0.204636	-0.207125	0.773899	-0.394326	-0.0339324	0.0374854	0.281061	0.998139	Q13247	Serine/arginine-rich splicing factor 6	SRSF6	DIKSKSRSRSQSRSNSPLPVPPSKARSVSPP	303
0.417335	-0.246117	0.19293	-0.201015	0.107512	-0.0247029	0.0232383	-0.228697	1.04802	-0.249481	0.253034	-0.316481	0.999906	Q13263	Transcription intermediary factor 1-beta	TRIM28	SAAAASAAAASAASGSPGPGEGSAGGEKRST	19
0.699223	-0.700997	1.02503	-0.821492	0.936558	-0.943708	1.3668	-1.70225	0.808481	-0.806269	1.21271	-1.08171	1	Q13263	Transcription intermediary factor 1-beta	TRIM28	LSLDGADSTGVVAKLSPANQRKCERVLLALF	697
0.244401	-0.856371	0.449459	-0.265514	0.219668	-0.828805	0.448328	-0.217189	0.247077	-0.752502	0.366627	-0.248418	0.999997	Q13263	Transcription intermediary factor 1-beta	TRIM28	YSSAEPHVSGVKRSRSGEGEVSGLMRKVPRV	473
-0.38527	0.380271	-0.369017	0.465834	-0.454485	0.331525	-0.332989	0.63566	-0.376668	0.298107	-0.294554	1.49163	0.996377	Q13283	Ras GTPase-activating protein-binding protein 1	G3BP1	PVLEETAPEDAQKSSSPAPADIAQTVQEDLR	232
0.703096	-0.70487	1.13803	-0.782275	0.828095	-0.835245	1.42313	-1.28636	-0.263647	-0.97202	0.426838	0.262306	0.998891	Q13310	Polyadenylate-binding protein 4	PABPC4	KKEAAQKVGAVAAATS_______________	644
0.607484	-0.244952	0.256207	-1.17819	0.378623	-0.0862425	0.0847779	-1.33995	0.567256	-0.169143	0.172696	-0.567438	1	Q13322	Growth factor receptor-bound protein 10	GRB10	QPRASGPPRSIQPQVSPRQRVQRSQPVHILA	104
1.10744	-1.02538	1.03664	-1.87704	1.14541	-0.983806	0.982341	-2.24064	0.839858	-0.837646	0.900111	-1.50909	0.999987	Q13330	Metastasis-associated protein MTA1	MTA1	NVKAGVVNGTGAPGQSPGAGRACESCYTTQS	386
0.0887986	0.0268592	-0.0156051	-0.717491	0.419437	-0.369993	0.368529	-0.537973	0.0204986	-0.0182868	0.0338786	-0.0664132	0.985543	Q13330	Metastasis-associated protein MTA1	MTA1	TRLDGERPGPNRSNMSPHGLPARSSGSPKFA	449
1.557	-1.08465	1.0959	-1.61769	1.91069	-1.07614	1.07467	-1.49402	0.650922	-0.765235	0.445876	-0.445876	0.892132	Q13416	Origin recognition complex subunit 2	ORC2	FSLKNDPEITINVPQSSKGHSASDKVQPKNN	138
-0.19784	0.459696	-0.246811	0.176727	-0.149271	0.142369	-0.399702	0.15175	-0.126877	0.305082	-0.267523	0.125535	0.999019	Q13424	Alpha-1-syntrophin	SNTA1	GWDSPPASPLQRQPSSPGPTPRNFSEAKHMS	201
-0.404872	0.403098	-0.473561	0.558183	-0.340445	0.179255	-0.18072	0.542892	-0.325835	0.297584	-0.294031	0.603776	1	Q13425	Beta-2-syntrophin	SNTB2	SPPAPPRGPAGEAGASPPVRRVRVVKQEAGG	110
-0.629543	0.627769	-0.66537	0.759169	-0.582143	0.574993	-0.621602	0.88623	-0.421289	0.423501	-0.426657	0.425711	0.999785	Q13427	Peptidyl-prolyl cis-trans isomerase G	PPIG	NSSNNSREKKADRDQSPFSKIKQSSQDNELK	687
-0.624818	0.448932	-0.437678	0.703399	-0.512838	0.505688	-0.581505	0.775158	-0.415714	0.359796	-0.319799	0.319799	1	Q13427	Peptidyl-prolyl cis-trans isomerase G	PPIG	KGDKSELNEIKENQRSPVRVKERKITDHRNV	397
-0.482962	0.481188	-0.59267	0.830809	-0.531274	0.524124	-0.809349	1.11574	0.00971402	-0.00750225	-1.09386	0.293484	0.994971	Q13427	Peptidyl-prolyl cis-trans isomerase G	PPIG	KADRDQSPFSKIKQSSQDNELKSSMLKNKED	696
-0.379753	0.20865	-0.197396	0.26924	-0.390824	0.267739	-0.269204	0.363231	-0.28224	0.145106	-0.132879	0.132879	1	Q13427	Peptidyl-prolyl cis-trans isomerase G	PPIG	RVKERKITDHRNVSESPNRKNEKEKKVKDHK	415
-0.455495	0.371059	-0.359805	0.820019	-0.319337	0.239936	-0.241401	0.748571	-0.5425	0.348747	-0.345194	0.609587	1	Q13428	Treacle protein	TCOF1	GKTHQIRAALAPAKESPRKGAAPTPPGKTGP	906
-0.248462	0.246688	-0.679209	0.625845	-0.255689	0.248539	-0.3682	0.788524	-0.481647	0.483859	-0.516429	0.743394	1	Q13428	Treacle protein	TCOF1	GKTSQVGAASAPAKESPRKGAAPAPPGKTGP	381
0.973792	-1.48739	1.11831	-0.994906	1.08967	-1.09682	1.15815	-1.30801	0.915447	-0.95066	1.15597	-0.916789	0.999404	Q13428	Treacle protein	TCOF1	KGATPAPPGKAGAVASQTKAGKPEEDSESSS	328
1.93237	-1.7632	1.77445	-2.75247	2.02975	-1.48199	1.48053	-1.79602	1.97464	-1.70341	1.70696	-2.12493	0.965233	Q13428	Treacle protein	TCOF1	TAHPRIAPKASMAGASSSKESSRISDGKKQE	1041
-0.36509	0.363316	-0.498587	0.418333	-0.449562	0.296423	-0.297887	0.486737	-0.504218	0.312612	-0.309059	0.442848	0.99935	Q13428	Treacle protein	TCOF1	VKPAQVKASSVSTKESPARKAAPAPGKVGDV	233
-0.248877	0.206137	-0.0318368	0.0237516	-0.0159572	0.172519	-0.0349717	0.0184361	-0.120278	0.173033	0.118009	-0.211349	0.961152	Q13428	Treacle protein	TCOF1	PANSQASKATPKLDSSPSVSSTLAAKDDPDG	1228
-0.247398	0.245624	-0.310123	0.436223	-0.332764	0.863525	-0.426808	0.335243	-0.420082	0.430877	0.16264	-0.16264	0.999979	Q13428	Treacle protein	TCOF1	EKKKKAKKASTKDSESPSQKKKKKKKKTAEQ	1471
-0.653945	0.652171	-1.27878	1.47209	-0.821926	0.814776	-1.61363	1.78391	-0.0163718	0.0185836	-0.161251	0.134786	0.999551	Q13428	Treacle protein	TCOF1	ASGDVKEKKGKGSLGSQGAKDEPEEELQKGM	1410
-0.444046	0.442272	-0.48508	0.795918	-0.646154	0.399467	-0.400931	0.720077	-0.144966	0.0544475	-0.0508944	0.450069	0.99982	Q13428	Treacle protein	TCOF1	KKKKLGAGEGGEASVSPEKTSTTSKGKAKRD	1378
0.0113415	-0.102586	-0.02176	0.211529	0.0471651	-0.389272	0.0342178	-0.0260535	0.151143	-0.417973	0.197862	-0.152484	1	Q13435	Splicing factor 3B subunit 2	SF3B2	EKILQLKESRQEEMNSQQEEEEMETDARSSL	289
-0.764936	0.763162	-0.820955	0.832683	-0.188131	0.162027	-0.163492	0.4455	-1.9064	0.605236	-0.601683	1.07917	0.995108	Q13435	Splicing factor 3B subunit 2	SF3B2	EEEEMETDARSSLGQSASETEEDTVSVSKKE	307
-1.05304	1.05126	-2.13999	1.2843	-0.833916	0.826766	-1.51552	1.32292	-0.759868	0.76208	-2.01759	0.948404	0.99904	Q13439	Golgin subfamily A member 4	GOLGA4	SLFRSSSKESLVRTSSRESLNRLDLDSSTAS	98
0.134271	-0.136045	0.432581	-0.221443	0.123397	-0.130547	0.603048	-0.248003	0.119529	-0.117317	0.561183	-0.749606	0.899436	Q13451	Peptidyl-prolyl cis-trans isomerase FKBP5;Peptidyl-prolyl cis-trans isomerase FKBP5, N-terminally processed	FKBP5	___MTTDEGAKNNEESPTATVAEQGEDITSK	13
0.0584358	0.043325	-0.0320709	-0.209724	0.383857	-0.208855	0.20739	-0.43304	0.304546	-0.193358	0.154887	-0.154887	0.999482	Q13459	Unconventional myosin-IXb	MYO9B	VGKVSEETEKTLPSGSPRPGQLERPTSLALD	1242
-0.212374	0.370075	-0.460674	0.191261	-0.239216	0.359492	-0.426118	0.241695	-0.113111	0.320424	-0.377915	0.111769	0.999888	Q13459	Unconventional myosin-IXb	MYO9B	KSKPCGSPRVQEKPDSPGGSTQIQRYLDAER	1290
0.447786	-0.646958	0.636417	-0.468899	0.244647	-0.529395	0.493717	-0.242168	0.511845	-1.00414	0.491395	-0.491395	0.999681	Q13501	Sequestosome-1	SQSTM1	IDVEHGGKRSRLTPVSPESSSTEEKSSSQPS	272
-0.73001	0.540814	-0.52956	0.589947	-0.786464	0.464368	-0.465833	0.895697	-0.480612	0.402526	-0.398973	0.729061	1	Q13523	Serine/threonine-protein kinase PRP4 homolog	PRPF4B	PRDDILSRRERSKDASPINRWSPTRRRSRSP	431
-0.288731	0.190337	-0.179083	0.419256	-0.895925	0.647176	-0.648641	0.945382	-0.17234	0.641488	0.0330948	-0.0330948	0.819661	Q13523	Serine/threonine-protein kinase PRP4 homolog	PRPF4B	TDKEKKPIKSPSKDASSGKENRSPSRRPGRS	334
-0.159371	0.281728	-2.0726	0.138257	-0.237982	0.244696	-1.98298	0.240461	-0.0276533	0.0298651	0.384345	-0.282736	1	Q13523	Serine/threonine-protein kinase PRP4 homolog	PRPF4B	DANSEKSINEENGEVSEDQSQNKHSRHKKKK	32
0.500722	-0.502496	0.821843	-0.627018	0.534505	-0.541655	0.541568	-0.585629	0.887566	-0.885354	1.28159	-1.32853	0.877296	Q13523	Serine/threonine-protein kinase PRP4 homolog	PRPF4B	VKAKHNLMTVEQNNGSSQKKLLAPDMFTESD	622
-0.151565	0.0736064	-0.0623523	0.412944	-0.21414	0.20699	-0.447913	0.356082	-0.0880986	0.344744	0.00896211	-0.00896211	0.997624	Q13523	Serine/threonine-protein kinase PRP4 homolog	PRPF4B	SKERKKSKSPSKRSKSQDQARKSKSPTLRRR	232
-0.574148	0.368129	-0.356875	0.714244	-0.946128	0.806601	-0.808065	0.890761	0.125928	0.656824	-0.214628	-0.12727	0.99996	Q13523	Serine/threonine-protein kinase PRP4 homolog	PRPF4B	NDRRSKQSKSPSRTLSPGRRAKSRSLERKRR	387
-0.638628	0.636854	-0.628238	0.852181	-0.719583	0.494789	-0.496254	0.942371	-0.560127	0.562339	-0.572002	0.774597	1	Q13547	Histone deacetylase 1	HDAC1	GVQMQAIPEDAIPEESGDEDEDDPDKRISIC	393
0.066229	0.45307	-0.0766475	-0.881844	0.105804	0.602163	-0.0977183	-0.555853	0.0493465	0.251896	-0.0516159	-0.883653	0.975633	Q13586	Stromal interaction molecule 1	STIM1	VAEEDNGSIGEETDSSPGRKKFPLKIFKKPL	668
0.109236	-0.11101	0.281037	-0.853272	0.111415	-0.118565	0.225178	-0.839039	0.228667	-0.226456	0.373445	-0.812435	1	Q13601	KRR1 small subunit processome component homolog	KRR1	_____________MASPSLERPEKGAGKSEF	3
-0.826882	0.586897	-0.575643	0.893979	-0.674882	0.667732	-0.945537	1.10222	-0.62507	0.627282	-0.892056	1.09375	0.999999	Q13610	Periodic tryptophan protein 1 homolog	PWP1	LIAEAKEKLQEEGGGSDEEETGSPSEDGMQS	50
0.0346102	-0.839515	0.62421	-0.0557236	-0.0509025	-0.444736	1.20423	0.0533815	0.121835	-0.2245	0.913154	-0.123177	0.975828	Q13610	Periodic tryptophan protein 1 homolog	PWP1	FGRRERLVLGSARNSSISGPFGSRSSDTPME	485
0.0483018	0.00374697	0.00750712	-1.11072	0.121463	0.0435448	-0.0450094	-0.6263	0.132518	-0.0825793	0.0861324	-0.959801	0.966044	Q13620	Cullin-4B	CUL4B	DAKMAEESSSSSSSSSPTAATSQQQQLKNKS	146
-0.330245	0.328471	-0.559007	1.06758	-0.446662	0.31533	-0.316795	1.08564	-0.156757	0.320311	-0.298969	0.155416	0.974476	Q13625	Apoptosis-stimulating of p53 protein 2	TP53BP2	QSNAPPSFGTLRKNQSSEDILRDAQVANKNV	480
-0.522895	0.0300548	-0.0188007	0.377881	-0.519484	-0.0918482	0.0903835	0.400547	-0.252401	-0.0459568	0.0495098	0.231101	0.999739	Q13769	THO complex subunit 5 homolog	THOC5	VIRSDGAPAEGKRNRSDTEQEGKYYSEEAEV	28
-0.484989	0.64341	-0.916011	0.463876	-0.810068	0.802919	-1.47964	1.23624	-0.790355	0.647546	-0.643993	0.807951	0.963436	Q13829	BTB/POZ domain-containing adapter for CUL3-mediated RhoA degradation protein 2	TNFAIP1	SLLEATSRSRSQASPSEDEETFELRDRVRRI	280
0.0668059	-0.0975415	0.073996	-0.0820813	0.326208	-0.288333	0.286868	-0.899552	0.255833	-0.253621	0.429704	-0.388256	1	Q13884	Beta-1-syntrophin	SNTB1	AGAGHPGAGGAQPPDSPAGVRTAFTDLPEQV	87
1.3972	-1.78045	1.97826	-1.41832	0.846018	-1.51062	0.532195	-0.524031	1.68555	-1.36786	1.36971	-1.36971	0.999982	Q13905	Rap guanine nucleotide exchange factor 1	RAPGEF1	QQTDTPPALPEKKRRSAASQTADGSGCRVSY	463
0.643827	-0.645601	0.895311	-1.23332	1.04242	-1.04957	1.58736	-2.12306	1.05858	-1.05637	1.40962	-1.79555	0.999999	Q14008	Cytoskeleton-associated protein 5	CKAP5	LLSQIDAEFEKMQGQSPPAPTRGISKHSTSG	816
-0.0217934	-0.0168358	0.36388	0.000679992	-0.085902	-0.0399991	0.278012	0.0329275	0.0213093	-0.156357	0.408531	-0.0226506	0.966015	Q14103	Heterogeneous nuclear ribonucleoprotein D0	HNRNPD	IDASKNEEDEGHSNSSPRHSEAATAQREEWK	83
0.783082	-0.784856	1.19823	-1.03506	0.636836	-0.643985	0.963858	-1.25622	0.328308	-0.912193	0.850496	-0.329649	0.995431	Q14134	Tripartite motif-containing protein 29	TRIM29	ASRSNGSSPEARDARSPSGPSGSLENGTKAD	21
0.982336	-0.98411	1.21674	-1.4084	1.18626	-1.19341	1.33711	-2.27327	1.1059	-1.10369	1.29323	-1.50295	0.999729	Q14134	Tripartite motif-containing protein 29	TRIM29	YLTPKGGVRTSYQPSSPGRFTKETTQKNFNN	489
-0.506851	0.44823	-0.436976	0.841581	-0.458916	0.451766	-0.592806	0.777963	-0.513977	0.436298	-0.432745	0.578565	0.999796	Q14151	Scaffold attachment factor B2	SAFB2	ISVKTTSRSKERSSKSQDRKSESKEKRDILS	598
-0.214327	-0.0700478	0.0813019	0.420133	-0.129906	0.270845	-0.187722	0.132385	-0.119342	0.121554	-0.138577	0.535289	0.930601	Q14152	Eukaryotic translation initiation factor 3 subunit A	EIF3A	EERERRREEERRLGDSSLSRKDSRWGDRDSE	881
-0.272819	0.271045	-0.355207	0.696452	-0.281687	0.274537	-0.443043	0.825159	-0.265005	0.267217	-0.487279	0.579555	0.992365	Q14157	Ubiquitin-associated protein 2-like	UBAP2L	KKKGVSGQKDGGQTESNEEGKENRDRDRDYS	116
-0.472159	0.502795	-0.440161	0.432076	-0.480555	0.446516	-0.447981	0.567466	-0.346723	0.432556	-0.378256	0.345382	0.989665	Q14157	Ubiquitin-associated protein 2-like	UBAP2L	QRSTQTRRYPSSISSSPQKDLTQAKNGFSSV	609
1.43661	-1.35844	0.975678	-0.983763	2.26288	-1.27968	1.27821	-1.80645	1.30551	-0.99735	1.0009	-1.31515	0.994704	Q14160	Protein scribble homolog	SCRIB	LKLDYRALAAVPSAGSVQRVPSGAAGGKMAE	1279
0.227786	-0.0243091	0.0355631	-0.669328	0.250563	0.0861667	-0.0876313	-1.46355	0.162639	-0.202027	-0.164908	0.344333	1	Q14160	Protein scribble homolog	SCRIB	TAKAERRHQERLRVQSPEPPAPERALSPAEL	1475
-0.390979	1.4835	-0.343154	0.335069	-0.674785	1.37419	-0.563338	0.571502	-0.475738	1.36502	-0.554902	0.474397	0.892611	Q14160	Protein scribble homolog	SCRIB	DEQPPWASPSPTSRQSPASPPPLGGGAPVRT	1445
-0.375313	0.93378	-0.551512	0.3542	-0.446418	1.31904	-0.878266	0.448897	-0.348155	0.791774	-0.544955	0.346814	0.987143	Q14160	Protein scribble homolog	SCRIB	PPWASPSPTSRQSPASPPPLGGGAPVRTAKA	1448
0.0940965	0.104404	-0.277493	-0.103845	-0.0512515	0.154461	0.0593375	-0.0766563	0.299205	0.218499	-0.263265	-0.214017	0.999463	Q14160	Protein scribble homolog	SCRIB	EGRRSEACPCQPDSGSPLPAEEEKRLSAESG	504
0.140565	0.108564	-0.314496	-0.108005	-0.0380426	0.278773	0.0461285	-0.153102	-0.0886968	0.0909086	-0.265534	0.304876	1	Q14186	Transcription factor Dp-1	TFDP1	IEANGELKVFIDQNLSPGKGVVSLVAVHPST	23
0.442949	-0.323393	0.334647	-0.345599	-0.0430542	-0.0808527	0.0511402	0.0459591	0.292284	-0.290072	0.673525	-0.390138	1	Q14241	Transcription elongation factor B polypeptide 3	TCEB3	KSHKALSKEENRRPPSGDNAREKPPSSGVKK	311
0.699529	-0.701303	0.734582	-0.972975	0.555549	-0.562699	0.570929	-0.594232	0.854563	-0.798498	0.802051	-1.23523	0.998312	Q14244	Ensconsin	MAP7	RENVLFLTSGTRRAVSPSNPKARQPARSRLW	315
0.755664	-0.757438	0.852029	-1.00405	0.424887	-0.528592	0.442938	-0.422408	0.345454	-0.103125	0.106678	-0.252474	0.999666	Q14258	E3 ubiquitin/ISG15 ligase TRIM25	TRIM25	PPADVWTPPARASAPSPNAQVACDHCLKEAA	100
-0.516103	0.377209	-0.365955	0.837214	-0.590649	0.23608	-0.237545	0.853453	-0.466144	0.303983	-0.30043	0.688573	1	Q14498	RNA-binding protein 39	RBM39	SRRRSRSKSPFRKDKSPVREPIDNLTPEERD	136
-0.0759105	0.0741364	0.0901517	-0.617176	-0.0408066	0.0336567	0.104235	-0.654781	-0.170009	0.17222	0.364694	-0.825927	0.849976	Q14542	Equilibrative nucleoside transporter 2	SLC29A2	TKAELLQSDENGIPSSPQKVALTLDLDLEKE	252
0.391824	1.33283	-0.752261	-0.412937	0.331349	1.54104	-1.08299	-0.32887	0.0458735	0.72643	-0.664655	-0.0472148	0.999997	Q14669	E3 ubiquitin-protein ligase TRIP12	TRIP12	GSPSLQHSRDDSLDLSPQGRLSDVLKRKRLP	991
-0.511223	0.509449	-0.541075	0.884022	-0.534518	0.527368	-0.965259	0.92584	-0.375289	0.377501	-0.37547	0.663653	0.998826	Q14669	E3 ubiquitin-protein ligase TRIP12	TRIP12	AKLASLRKSTKKRSESPPAELPSLRRSTRQK	312
0.161359	-0.117658	0.128912	-1.3366	0.162448	-0.0751342	0.0736696	-1.24933	0.243847	-0.199136	0.202689	-1.18013	0.985602	Q14669	E3 ubiquitin-protein ligase TRIP12	TRIP12	KKRHLDQEQQLKSAQSPSTSKAHTRKSGATG	127
-1.09638	1.0946	-1.35807	1.35058	-0.728924	0.65663	-0.658095	1.14298	-1.05985	1.06206	-1.12611	1.24063	0.999792	Q14669	E3 ubiquitin-protein ligase TRIP12	TRIP12	QVPKKDNSRGVKRSASPDYNRTNSPSSAKKP	77
-1.58961	1.45237	-1.29195	1.28387	-1.81702	1.31486	-1.30487	1.31304	-1.11131	1.21785	-0.98968	0.98968	0.99598	Q14669	E3 ubiquitin-protein ligase TRIP12	TRIP12	RGVKRSASPDYNRTNSPSSAKKPKALQHTES	85
0.150669	-0.152443	0.195165	-0.454601	1.07577	-1.08292	1.26297	-1.61452	1.09164	-1.08943	1.15282	-1.14223	1	Q14671	Pumilio homolog 1	PUM1	YFFQRQHGEQLGGGGSGGGGYNNSKHRWPTG	98
-0.727045	0.175375	-0.164121	0.430919	-0.326827	0.195198	-0.196663	0.656534	-0.657401	0.235723	-0.23217	0.743354	0.996276	Q14676	Mediator of DNA damage checkpoint protein 1	MDC1	CLSPPRAIPGDQHPESPVHTEPMGIQGRGRQ	793
-0.358493	0.356719	-0.673848	0.515353	-0.230477	0.27569	-0.603509	0.232956	-0.221372	0.405284	-0.281229	0.22003	0.993563	Q14678	KN motif and ankyrin repeat domain-containing protein 1	KANK1	AASQINVCGVRKRSYSAGNASQLEQLSRARR	325
-0.494895	0.493121	-0.861473	1.52255	-0.533903	0.426549	-0.428013	1.58305	-1.21332	1.21333	-1.20978	2.09783	0.988026	Q14683	Structural maintenance of chromosomes protein 1A	SMC1A	LSKGTMDDISQEEGSSQGEDSVSGSQRISSI	957
0.195277	0.332672	-0.205695	-0.894729	0.243386	0.491019	-0.2353	-0.419519	0.147265	0.267368	-0.149534	-1.04941	0.997347	Q14684	Ribosomal RNA processing protein 1 homolog B	RRP1B	SQSGPSGSHPQGPRGSPTGGAQLLKRKRKLG	513
0.946081	-0.403154	0.414408	-2.12176	0.766141	-0.415725	0.414261	-1.34268	0.984894	-0.412766	0.416319	-1.77847	0.999896	Q14684	Ribosomal RNA processing protein 1 homolog B	RRP1B	NMTAEFKKTDKSILVSPTGPSRVAFDPEQKP	706
-2.46917	2.59356	-2.77768	2.44806	-2.92543	2.58742	-2.54362	2.55179	-2.6892	2.48986	-2.32404	2.32404	0.906571	Q14684	Ribosomal RNA processing protein 1 homolog B	RRP1B	PEQKPLHGVLKTPTSSPASSPLVAKKPLTTT	732
0.144428	-0.146202	0.277716	-1.00681	0.0860337	-0.0931836	0.120844	-0.619483	0.235077	-0.232866	0.484082	-1.11597	1	Q14687	Genetic suppressor element 1	GSE1	RLALSTRYSPDEMNNSPNFEEKKKFLTIFNL	857
0.437761	-0.17009	0.181344	-1.81754	0.265543	-0.0143992	0.0129346	-1.25458	0.506224	0.0173429	-0.0137898	-1.64055	1	Q14692	Ribosome biogenesis protein BMS1 homolog	BMS1	ISGSKAAGEGSKAGLSPANCQSDRVNLEKSL	552
-0.377392	0.561895	-0.743194	0.356278	-0.48755	0.4804	-0.602376	0.69457	-0.513139	0.518771	-0.764157	0.511798	1	Q14694	Ubiquitin carboxyl-terminal hydrolase 10	USP10	NHSVNEEEQEEQGEGSEDEWEQVGPRNKTSV	576
-1.97608	1.22097	-1.20972	1.43357	-2.36081	1.33864	-1.33571	1.34388	-1.27073	0.885939	-0.882386	1.07875	0.920046	Q14694	Ubiquitin carboxyl-terminal hydrolase 10	USP10	FMGDMPPSVTPRTCNSPQNSTDSVSDIVPDS	211
0.390219	-0.570191	0.000699997	-0.00878524	0.195937	-0.219377	-0.187851	0.207441	0.294825	-0.35519	0.227053	-0.227053	0.996736	Q14739	Lamin-B receptor	LBR	PLTSFRQRKGGSTSSSPSRRRGSRSRSRSRS	71
-0.408008	0.174046	-0.162792	0.498653	-0.335492	0.154758	-0.156223	0.424563	-0.428639	0.564196	-0.14377	0.14377	0.998568	Q14739	Lamin-B receptor	LBR	SRSPGRPPKSARRSASASHQADIKEARREVE	99
0.975717	-0.726117	0.737372	-1.42544	0.679471	-0.538652	0.537187	-0.900518	0.827466	-0.706834	0.710387	-1.28443	1	Q14814	Myocyte-specific enhancer factor 2D	MEF2D	TPSLVTSSLTDPRLLSPQQPALQRNSVSPGL	180
-1.17611	1.17434	-1.30414	1.48782	-1.13995	1.1328	-1.21346	1.8057	-0.780718	0.710657	-0.707104	1.19835	0.999651	Q14839	Chromodomain-helicase-DNA-binding protein 4	CHD4	ELAEVEENKKMSQPGSPSPKTPTPSTPGDTQ	1535
0.323614	-0.54952	0.669837	-0.344728	0.494168	-0.888735	0.845953	-0.491689	0.599679	-0.597467	1.07993	-0.779302	1	Q14847	LIM and SH3 domain protein 1	LASP1	MGPSGGEGMEPERRDSQDGSSYRRPLEQQQP	146
1.99109	-1.98401	1.99527	-2.40314	2.10944	-1.67349	1.67202	-2.61051	1.64483	-1.64262	1.79678	-1.87034	1	Q14847	LIM and SH3 domain protein 1	LASP1	DTPENLRLKQQSELQSQVRYKEEFEKNKGKG	82
-0.445193	0.443419	-0.436024	0.500553	-0.334462	0.327312	-0.568103	0.568957	-0.308103	0.310315	-0.599825	0.674841	0.940696	Q14966	Zinc finger protein 638	ZNF638	DVSSSKPSIKAVIVSSPKAKATVSKTENQKS	1401
-0.530263	0.528489	-0.563541	0.641392	-0.167	0.15985	-0.447949	0.54145	-0.420519	0.422731	-0.563934	0.471449	1	Q14978	Nucleolar and coiled-body phosphoprotein 1	NOLC1	GTSALTAQNGKAAKNSEEEEEEKKKAAVVVS	563
-1.08444	1.06535	-1.0541	1.46159	-0.835883	0.681215	-0.68268	1.08173	-0.984921	0.830182	-0.826629	0.966826	1	Q14978	Nucleolar and coiled-body phosphoprotein 1	NOLC1	PNTFPKRKKGEKRASSPFRRVREEEIEVDSR	623
-0.135097	0.567192	-0.155314	0.113983	-0.366699	0.359549	-0.399503	0.448868	-0.224399	0.402636	-0.239767	0.223058	1	Q14978	Nucleolar and coiled-body phosphoprotein 1	NOLC1	DDSSEEEEEKLKGKGSPRPQAPKANGTSALT	538
-0.560364	-0.615432	2.61635	0.539251	-1.60014	-1.22405	3.41139	1.21698	-0.416957	-0.580107	2.13491	0.415616	1	Q14978	Nucleolar and coiled-body phosphoprotein 1	NOLC1	VREEEIEVDSRVADNSFDAKRGAAGDWGERA	643
-0.371892	0.488091	-0.391635	0.350778	-0.606422	0.538584	-0.540049	0.638793	-0.47723	0.508726	-0.525351	0.475889	0.999997	Q14980	Nuclear mitotic apparatus protein 1	NUMA1	PRTQPDGTSVPGEPASPISQRLPPKVESLES	1757
1.74775	-1.59495	1.60621	-3.75073	1.27081	-1.25427	1.25281	-2.46581	0.443825	-0.849371	0.336953	-0.336953	0.999997	Q14C86	GTPase-activating protein and VPS9 domain-containing protein 1	GAPVD1	DDLGPDRFSTLTDDPSPRLSAQAQVAEDILD	1019
-0.126928	-0.360913	2.40903	0.105814	1.1966	-1.20375	3.09401	-1.88697	0.601837	-0.599625	2.8992	-1.12517	0.830888	Q15003	Condensin complex subunit 2	NCAPH	_MGPPGPALPATMNNSSSETRGHPHSASSPS	15
1.14627	-1.10121	1.01117	-1.01926	1.57698	-1.07477	1.07331	-1.78287	0.296527	-0.294315	0.427949	-0.410559	0.996831	Q15003	Condensin complex subunit 2	NCAPH	HWRFRPRRKQDAPSQSENKKKSTKKDFEIDF	459
1.72832	-1.52272	1.53397	-3.41361	1.087	-0.90938	0.907915	-1.54536	1.29006	-1.10003	1.10358	-1.71683	0.999585	Q15003	Condensin complex subunit 2	NCAPH	VFDLQFSTDSPRLLASPSSRSIDISATIPKF	87
-0.399559	0.144992	-0.133737	0.545993	-0.652157	0.588753	-0.590217	1.02587	-0.593495	0.530419	-0.526866	0.749883	0.999785	Q15007	Pre-mRNA-splicing regulator WTAP	WTAP	GFHREGNTTEDDFPSSPGNGNKSSNSSEERT	306
0.612712	-0.614486	1.55108	-0.771502	0.452252	-0.459402	1.23262	-0.596655	0.50773	-0.505518	1.07649	-0.82835	1	Q15014	Mortality factor 4-like protein 2	MORF4L2	PGRWGGRSAENPPSGSVRKTRKNKQKTPGNG	71
-0.141637	0.139863	-0.752198	0.423655	-0.416865	0.300336	-0.301801	0.552257	-0.377388	0.3796	-0.415537	0.520301	1	Q15019	Septin-2	2002-09-01	IEEHNIKIYHLPDAESDEDEDFKEQTRLLKA	218
-0.472442	0.457792	-0.297666	0.289581	-1.22947	0.881182	-0.600345	0.60851	-0.388424	0.615588	-0.344076	0.344076	0.999846	Q15021	Condensin complex subunit 1	NCAPD2	KPSTGSRYQPLASTASDNDFVTPEPRRTTRR	1333
-0.577442	0.575668	-0.672389	0.821213	-0.520399	0.513249	-0.78656	0.934586	-0.499103	0.501314	-0.691444	0.695055	1	Q15022	Polycomb protein SUZ12	SUZ12	CRPKRTKASMSEFLESEDGEVEQQRTYSSGH	546
0.232798	-0.234572	0.368794	-0.410505	0.339305	-0.346455	0.369787	-1.07654	0.265303	-0.263091	0.289844	-1.52206	0.96779	Q15025	TNFAIP3-interacting protein 1	TNIP1	SQVMDPPTARPTEPESPKNDREGPQ______	627
-1.10123	0.921503	-0.910249	1.41074	-0.355288	0.169089	-0.170554	0.405392	-0.742554	0.550739	-0.547186	0.641323	0.998358	Q15036	Sorting nexin-17	SNX17	KMLRRRVGGTLRRSDSQQAVKSPPLLESPDA	409
-0.0362951	0.05495	0.0258766	-1.13552	-0.0156808	0.00853082	0.0627311	-0.935363	0.114694	-0.0325423	0.0360954	-0.381791	0.99983	Q15036	Sorting nexin-17	SNX17	WRVTSSVPLPSGSTSSPGRGRGEVRLELAFE	336
-0.628936	0.664882	-0.637325	0.607823	-0.571372	0.564222	-0.879669	0.783724	-0.505448	0.59789	-0.714919	0.504107	0.999831	Q15059	Bromodomain-containing protein 3	BRD3	TTTPTTSAITASRSESPPPLSDPKQAKVVAR	263
-0.0744489	-0.117911	0.0640304	0.382784	0.155253	-0.162403	0.314444	-0.939984	0.123307	-0.121096	0.20576	-0.814406	0.994028	Q15061	WD repeat-containing protein 43	WDR43	LITQVTASEKTKGATSPGQKAKLVYEEESSE	590
-0.63104	0.518589	-0.507335	0.598887	-0.456651	0.424831	-0.426296	0.724628	-0.398536	0.323634	-0.320081	0.534138	1	Q15061	WD repeat-containing protein 43	WDR43	CTCLAWAPARLQAKESPQRKKRKSEAVGMSN	77
0.568442	-0.880098	0.604446	-0.589555	1.13498	-1.06046	1.059	-2.45674	1.18699	-1.18477	1.19128	-1.63374	1	Q15061	WD repeat-containing protein 43	WDR43	KPAPPQTEQVESKRKSGGNEVSIEERLGAMD	431
-1.50997	0.838693	-0.332432	0.324347	-0.954965	-0.245647	0.244182	0.306646	-0.515024	0.514883	-0.51133	1.648	1	Q15121	Astrocytic phosphoprotein PEA-15	PEA15	RIPSAKKYKDIIRQPSEEEIIKLAPPPKKA_	116
0.186439	-0.125582	0.136836	-0.697896	0.164838	-0.136525	0.135061	-0.253286	0.373867	-0.210333	0.213886	-0.754171	1	Q15149	Plectin	PLEC	ELQLVTYKAQLEPVASPAKKPKVQSGSESVI	1435
-0.0184417	0.00238791	0.400488	-0.0026717	0.328536	-0.527768	1.04181	-0.326057	0.44921	-0.700461	0.948624	-0.450551	1	Q15149	Plectin	PLEC	FRAKIERARSDEGQLSPATRGAYRDCLGRLD	720
-2.24408	1.55414	-1.54288	2.08232	-0.836877	0.829727	-1.29841	1.34368	-2.63393	1.54037	-1.53682	1.90594	0.998397	Q15149	Plectin	PLEC	DMLSGNAGGFRSRSSSVGSSSSYPISPAVSR	4386
1.33347	-0.823698	0.834952	-1.31978	0.953259	-0.800021	0.798557	-2.57993	0.804644	-0.566201	0.569754	-0.759763	0.999995	Q15149	Plectin	PLEC	RSRSSSVGSSSSYPISPAVSRTQLASWSDPT	4396
-2.15609	0.967009	-0.955755	1.71078	-0.812486	0.0707607	-0.0722254	1.2583	-1.27773	0.838389	-0.834836	1.66336	0.940631	Q15154	Pericentriolar material 1 protein	PCM1	GVESDKRVTNDISPESSPGVGRRRTKTPHTF	68
-0.823935	0.436739	-0.425485	0.428972	-0.721943	0.312561	-0.258339	0.266503	-0.761758	0.733236	-0.729683	0.813461	0.923313	Q15172	Serine/threonine-protein phosphatase 2A 56 kDa regulatory subunit alpha isoform	PPP2R5A	KSVRKAQRQKRSQGSSQFRSQGSQAELHPLP	42
-0.405082	0.0606482	-0.0493941	0.541369	0.0901272	-0.0972771	-0.11133	0.614784	-0.247897	0.250109	-0.274903	0.490627	0.827687	Q15276	Rab GTPase-binding effector protein 1	RABEP1	KSDNDMFKDGLRRAQSTDSLGTSGSLQSKAL	407
0.956535	-0.958309	1.09178	-1.06089	0.546426	-0.425678	0.424213	-0.555898	0.373631	-0.371419	0.613298	-0.431958	1	Q15287	RNA-binding protein with serine-rich domain 1	RNPS1	____________MDLSGVKKKSLLGVKENNK	4
-0.316367	0.0435203	-0.0322663	0.372592	-0.370658	0.0622084	-0.063673	0.386882	-0.188912	-0.0357212	0.0392742	0.353231	0.897562	Q15291	Retinoblastoma-binding protein 5	RBBP5	SLMDEGASSEKKRQSSADGSQPPKKKPKTTN	441
1.12262	-1.1244	1.26893	-1.24328	0.848575	-0.855725	0.969612	-1.04153	1.00251	-1.0003	1.39973	-1.12947	0.992244	Q15365	Poly(rC)-binding protein 1	PCBP1	MSGAQIKIANPVEGSSGRQVTITGSAASISL	323
0.482303	-0.528339	0.518329	-0.503416	0.350513	-0.23542	0.233955	-0.240468	0.183073	-0.180862	0.626009	-1.02918	0.997545	Q15366	Poly(rC)-binding protein 2	PCBP2	PPKGVTIPYRPKPSSSPVIFAGGQDRYSTGS	189
0.615952	-0.50138	0.512634	-1.27616	0.430212	-0.354911	0.353447	-0.918492	0.479713	-0.382687	0.38624	-0.947375	1	Q15397	Pumilio domain-containing protein KIAA0020	KIAA0020	KKGVKQFKNKQQGDKSPKNKFQPANKFNKKR	77
0.433892	-0.248792	0.260047	-2.16036	0.495712	-0.13157	0.130105	-2.74384	0.397974	-0.242204	0.245758	-2.48755	0.989831	Q15398	Disks large-associated protein 5	DLGAP5	VSQSRNEMGIPQQTTSPENAGPQNTKSEHVK	662
-0.448764	-0.000578449	0.0118325	0.338017	0.135391	-0.709686	0.778825	-0.132912	0.433468	-0.971069	2.00278	-0.43481	0.999263	Q15398	Disks large-associated protein 5	DLGAP5	DVLMSSPEKNTASQNSILEEGETKISQSELF	777
-0.516893	0.515119	-0.804187	0.731521	-0.464197	0.457047	-0.746176	0.859381	0.249664	-0.266569	0.567411	-0.251005	0.999824	Q15424	Scaffold attachment factor B1	SAFB	APKESSTSEGADQKMSSPEDDSDTKRLSKEE	383
0.712659	-0.714433	1.26358	-1.17004	0.699916	-0.707066	1.18519	-1.161	0.631632	-0.62942	1.26592	-0.85783	0.999816	Q15424	Scaffold attachment factor B1	SAFB	PKESSTSEGADQKMSSPEDDSDTKRLSKEEK	384
-0.0418456	0.072305	0.0303319	-0.0384172	-0.0180992	0.0109492	0.308983	-0.136244	-0.0207214	0.0229332	0.0457328	-0.0897838	1	Q15424	Scaffold attachment factor B1	SAFB	SQDRKSASREKRSVVSFDKVKEPRKSRDSES	604
-0.61649	0.452525	-0.441271	0.884212	-0.508459	0.411586	-0.413051	1.05883	-0.566355	0.366984	-0.363431	0.787562	1	Q15424	Scaffold attachment factor B1	SAFB	DKSKGVPVISVKTSGSKERASKSQDRKSASR	582
0.280841	-1.22765	0.544147	-0.301955	0.87316	-0.818728	0.817264	-1.82257	1.17364	-1.17143	1.55901	-1.40868	0.995907	Q15428	Splicing factor 3A subunit 2	SF3A2	___MDFQHRPGGKTGSGGVASSSESNRDRRE	13
1.42322	-1.425	1.54311	-1.53945	1.12707	-1.13422	1.20015	-1.6285	1.15837	-1.15616	1.35657	-2.21328	0.970444	Q15428	Splicing factor 3A subunit 2	SF3A2	QHRPGGKTGSGGVASSSESNRDRRERLRQLA	19
1.50929	-1.38988	1.40113	-1.57238	1.09492	-0.943183	0.941718	-1.66956	0.805284	-0.732548	0.736101	-1.31225	0.984999	Q15555	Microtubule-associated protein RP/EB family member 2	MAPRE2	KPGSTPSRPSSAKRASSSGSASKSDKDLETQ	228
1.82001	-1.10763	1.11888	-2.79527	1.23518	-0.849927	0.848463	-1.34354	1.32377	-0.814653	0.818206	-1.76568	0.903466	Q15555	Microtubule-associated protein RP/EB family member 2	MAPRE2	TPSRPSSAKRASSSGSASKSDKDLETQVIQL	232
0.58407	-0.160356	0.17161	-0.681108	0.0406081	-0.047758	0.163599	-0.572126	0.265845	-0.263633	0.350306	-0.631026	1	Q15629	Translocating chain-associated membrane protein 1	TRAM1	TENGVNGTLTSNVADSPRNKKEKSS______	365
-1.11218	1.13855	-1.09156	1.08347	-1.32191	1.02122	-1.02268	1.20581	-0.810627	0.719697	-0.667102	0.667102	0.999279	Q15642	Cdc42-interacting protein 4	TRIP10	DVEFEDFSQPMNRAPSDSSLGTPSDGRPELR	296
1.70808	-1.52921	1.54046	-3.0399	1.18144	-0.989039	0.987574	-1.98398	0.830924	-0.598647	0.602201	-0.848807	0.999948	Q15650	Activating signal cointegrator 1	TRIP4	VKTPFDLAKAQENSNSVKKKTKFVNLYTREG	142
0.0937331	-0.0581415	0.0693956	-0.108656	-0.26426	0.0545577	-0.0560223	0.228526	0.0545794	-0.0523677	0.326812	-0.0662247	0.999999	Q15651	High mobility group nucleosome-binding domain-containing protein 3	HMGN3	__________MPKRKSPENTEGKDGSKVTKQ	6
-0.165007	0.163233	-0.650595	1.87554	-1.17988	0.204898	-0.206363	0.96756	-0.209285	-0.118625	0.122178	0.564816	0.99733	Q15742	NGFI-A-binding protein 2	NAB2	__________MHRAPSPTAEQPPGGGDSARR	6
-0.154586	0.215435	-0.555515	0.133473	-0.181349	0.174199	-0.365678	0.194919	-0.196386	0.290028	-0.336898	0.195045	0.999951	Q15751	Probable E3 ubiquitin-protein ligase HERC1	HERC1	MDNYMLSRNVDNAEGSDTDY___________	4857
0.148248	-0.529046	0.491027	-0.169362	0.378574	-0.443139	0.612427	-0.376095	0.102567	-0.259705	0.551436	-0.103908	0.995204	Q15758	Neutral amino acid transporter B(0)	SLC1A5	LLKHYRGPAGDATVASEKESVM_________	535
-0.316531	0.495707	-0.132867	0.124781	-0.149518	0.296953	-0.470001	0.151997	-0.243736	0.245948	-0.386146	0.536919	0.99999	Q15773	Myeloid leukemia factor 2	MLF2	RAEGPPRLAIQGPEDSPSRQSRRYDW_____	238
0.777312	-0.754848	0.766102	-2.81256	0.695524	-0.702674	0.755483	-2.93775	0.830928	-0.721828	0.725381	-2.1035	1	Q15942	Zyxin	ZYX	FSPVTPKFTPVASKFSPGAPGGSGSQPNQKL	281
1.18628	-1.18806	1.47738	-2.4255	1.16473	-1.17188	1.50169	-3.48319	1.15162	-1.14941	1.44554	-2.05892	0.999471	Q15942	Zyxin	ZYX	NQKLGHPEALSAGTGSPQPPSFTYAQQREKP	308
0.944781	-0.946555	1.03927	-1.41281	0.947056	-0.954206	0.959277	-1.69665	0.263933	-0.610417	0.380173	-0.265275	1	Q15942	Zyxin	ZYX	QHPVPPPAQNQNQVRSPGAPGPLTLKEVEEL	344
-0.629539	1.1745	-0.726783	0.608425	-1.0516	0.484007	-0.485472	0.813412	0.0805185	-0.0783067	-0.197198	0.292703	1	Q16204	Coiled-coil domain-containing protein 6	CCDC6	RILQEKLDQPVSAPPSPRDISMEIDSPENMM	244
-1.27502	1.27325	-2.23118	1.26259	-1.07177	1.06462	-1.35227	1.46241	-1.02343	1.02564	-1.2874	1.11184	1	Q16204	Coiled-coil domain-containing protein 6	CCDC6	GTSHGITRPSPRRSNSPDKFKRPTPPPSPNT	419
-0.0573471	0.555464	-0.295074	0.0362337	-0.0987809	0.34771	-0.41979	0.10126	-0.181777	0.158301	0.274968	-0.153819	0.982216	Q16512	Serine/threonine-protein kinase N1	PKN1	DISVEKLNLGTDSDSSPQKSSRDPPSSPSSL	562
-0.326091	-0.00564952	0.0169036	0.120933	-0.328533	0.175342	0.00921203	-0.00104774	-0.637189	0.110803	0.0772435	-0.0772435	0.999752	Q16513	Serine/threonine-protein kinase N2	PKN2	FDLEPEPPPAPPRASSLGEIDESSELRVLDI	583
0.544327	-0.959007	0.490727	-0.498813	0.0758756	-0.11728	0.321957	-0.0733967	-0.292023	-0.147081	0.150634	0.513289	1	Q16539	Mitogen-activated protein kinase 14	MAPK14	______________MSQERPTFYRQELNKTI	2
0.818659	-0.679531	0.646049	-0.654135	1.40363	-1.1124	1.11094	-2.44033	0.312982	-1.05257	-0.217997	0.217997	0.964722	Q16594	Transcription initiation factor TFIID subunit 9	TAF9	SLTGQRFTVQMPTSQSPAVKASIPATSAVQN	196
-0.529421	0.148727	-0.0872331	0.0791479	-0.310136	0.213054	-0.214519	0.284334	-0.28868	0.000256684	0.00329639	0.226168	1	Q16643	Drebrin	DBN1	GAIGQRLSNGLARLSSPVLHRLRLREDENAE	142
0.625114	-0.626888	0.795652	-1.47332	0.455176	-0.462326	0.52235	-1.12719	0.454628	-0.452417	0.648302	-1.43929	0.980469	Q16666	Gamma-interferon-inducible protein 16	IFI16	GPALSRKRKKEVDATSPAPSTSSTVKTEGAE	106
-1.26454	0.892873	-0.881619	1.34462	-1.31343	1.09046	-1.09193	1.71388	-1.07164	0.766797	-0.763244	1.27109	0.979264	Q16666	Gamma-interferon-inducible protein 16	IFI16	GPKGSKVSEEQTQPPSPAGAGMSTAMGRSPS	153
-0.48403	-1.97855	0.473612	0.549992	0.00517988	-0.552484	0.0029061	0.928448	-0.185938	-0.510726	0.337124	0.184597	0.98968	Q16832	Discoidin domain-containing receptor 2	DDR2	SLPSDSSMFNNNRSSSPSEQGSNSTYDRIFP	461
1.01673	-0.718305	0.729559	-2.27338	0.876846	-0.519264	0.5178	-2.09551	0.74549	-0.615829	0.619382	-1.77079	0.997846	Q1ED39	Lysine-rich nucleolar protein 1	KNOP1	QKLKFLRLMGGFKNLSPSFSRPASTIARPNM	387
-0.582335	0.580561	-0.642222	0.704374	-0.201528	0.194378	-0.474988	0.400953	-0.430422	0.395936	-0.392383	0.652294	0.999832	Q1KMD3	Heterogeneous nuclear ribonucleoprotein U-like protein 2	HNRNPUL2	VPGDKAAEEQGDDQDSEKSKPAGSDGERRGV	185
-0.470179	0.468404	-0.631479	0.488488	-0.344805	0.337655	-0.601941	0.464804	-0.327202	0.329413	-0.579064	0.372467	1	Q1KMD3	Heterogeneous nuclear ribonucleoprotein U-like protein 2	HNRNPUL2	EQGDDQDSEKSKPAGSDGERRGVKRQRDEKD	193
-0.545966	0.720606	-0.85635	0.524853	-0.632749	0.625599	-0.854016	0.985999	-0.402774	0.667681	-0.712409	0.401433	0.999995	Q1KMD3	Heterogeneous nuclear ribonucleoprotein U-like protein 2	HNRNPUL2	EQGLGKREEDEPEERSGDETPGSEVPGDKAA	161
0.287028	-0.288802	0.417453	-0.847577	0.238752	-0.236792	0.235327	-0.959773	0.325548	-0.253662	0.0864178	-0.0864178	1	Q29RF7	Sister chromatid cohesion protein PDS5 homolog A	PDS5A	KPINKGRKRAAVGQESPGGLEAGNAKAPKLQ	1305
1.01015	-1.62208	1.41711	-1.03127	0.821233	-0.828383	1.28343	-1.01874	1.20286	-1.20065	1.20859	-2.37539	0.952856	Q29RF7	Sister chromatid cohesion protein PDS5 homolog A	PDS5A	KNKEINSDQATQGNISSDRGKKRTVTAAGAE	1232
-0.265136	0.263362	-0.700894	0.819758	-0.380039	0.370775	-0.372239	0.724255	-0.307548	0.30976	-0.558174	0.357031	0.999959	Q29RF7	Sister chromatid cohesion protein PDS5 homolog A	PDS5A	NRSREQSSEAAETGVSENEENPVRIISVTPV	1195
-0.365534	0.36376	-0.531947	0.47885	-0.544396	0.490191	-0.491656	0.743256	-0.362853	0.365064	-0.381814	0.468358	0.999916	Q2KHR3	Glutamine and serine-rich protein 1	QSER1	QSSGPFKKQSATNLESEEDSEAPVDSTLNNN	987
-0.270084	0.26831	-0.390547	0.843962	-0.290257	0.215786	-0.21725	0.426064	-0.0803152	0.493155	-0.333066	0.0789739	0.98187	Q2KHT3	Protein CLEC16A	CLEC16A	TQHLPFRFYDQGRRGSSDPTVQRSVFASVDK	863
-1.94105	0.751202	-0.707447	0.699362	-1.25314	0.283455	-0.284919	0.360324	-0.747246	0.375672	-0.331682	0.331682	0.999999	Q2M2I8	AP2-associated protein kinase 1	AAK1	ASLNKSKSATTTPSGSPRTSQQNVYNPSEGS	678
-0.41449	0.332591	-0.321337	0.592108	-0.581103	0.233178	-0.234643	0.698755	-0.491466	0.0338402	-0.0142224	0.0142224	1	Q2TAM9	Tumor suppressor candidate gene 1 protein	TUSC1	TNRRARDSGREDEPGSPRALRARLEKLEAMY	153
-0.310036	0.775254	-0.520986	0.288922	-0.370442	0.731511	-0.577029	0.372921	-0.232511	0.496415	-0.344487	0.231169	0.999967	Q2TB10	Zinc finger protein 800	ZNF800	YLEHHKKTHKANASNSPEGNKTKGRSTRSKA	647
-0.868862	0.8227	-0.547537	0.539452	-0.3367	0.288066	-0.28953	0.347258	-0.800423	0.268888	-0.265335	0.288388	0.997776	Q2TB10	Zinc finger protein 800	ZNF800	DEAKHSDSKHDGTSNSPSKKYEVADVGIEVK	595
-0.450528	0.196961	-0.185707	0.593214	-0.334742	0.172677	-0.174142	0.836891	-0.111354	0.113566	-0.932463	0.320393	0.999998	Q2VPK5	Cytoplasmic tRNA 2-thiolation protein 2	CTU2	RAWGLQEIRDCLIEDSDDEAGQS________	508
0.788979	-0.321142	0.332396	-0.623585	0.751088	-0.691221	0.689757	-1.45879	0.843886	-0.562332	0.565885	-1.51394	0.999519	Q32MZ4	Leucine-rich repeat flightless-interacting protein 1	LRRFIP1	PKSEDADRCTLPEHESPSQDISDACEAESTE	733
1.02143	-1.0232	1.22616	-1.22681	1.05029	-1.05744	1.15886	-1.71556	0.399932	-0.395586	0.399139	-0.59647	0.97491	Q32MZ4	Leucine-rich repeat flightless-interacting protein 1	LRRFIP1	GVAKDNAKIDGATQSSPAEPKSEDADRCTLP	714
0.392349	-0.00173549	0.0129896	-0.971486	0.478596	-0.392259	0.390795	-1.69447	0.601332	-0.263762	0.267315	-0.699271	0.909279	Q32MZ4	Leucine-rich repeat flightless-interacting protein 1	LRRFIP1	PDEEKSDQQGEALDSSQKKTKNKKKKNKKKK	565
0.925255	-0.776916	0.78817	-1.50721	1.07366	-0.880054	0.87859	-1.82054	0.528292	-1.24228	0.598215	-0.529633	0.977288	Q32NC0	UPF0711 protein C18orf21	C18orf21	LKTPERRTANPNHDMSGSKGKSPASVFRTPT	152
0.912019	-0.93326	1.57535	-0.933132	1.03217	-1.03932	1.56719	-1.34845	1.10399	-1.10178	2.02715	-1.47172	0.902418	Q32P51	Heterogeneous nuclear ribonucleoprotein A1-like 2	HNRNPA1L2	SNFGPMKGGNFGGRSSGPYGGGGQYFAKPQN	286
0.0202377	0.0354802	-0.0242261	-0.0443538	0.104308	0.663275	-0.338393	-0.101829	-0.0503071	0.069252	-0.342928	0.0489658	0.999989	Q3KQU3	MAP7 domain-containing protein 1	MAP7D1	ASPRARLSASTASELSPKSKARPSSPSTSWH	460
1.62586	-1.46264	1.47389	-2.63207	1.61326	-1.25032	1.24886	-2.74659	0.410282	-0.85412	0.212194	-0.212194	0.999992	Q3KQU3	MAP7 domain-containing protein 1	MAP7D1	PFAEAEAFLKKAVVQSPQVTEVL________	834
0.0364291	0.705253	-0.0468476	-0.359594	-0.0135599	0.597605	0.0216459	-0.957269	0.165808	-0.163597	0.275197	-1.67766	0.99513	Q3KQU3	MAP7 domain-containing protein 1	MAP7D1	PSGQVGPRPAPPQEESPSSEAKSRGPTPPAM	86
0.0196799	0.224761	-0.0300984	-1.11743	0.117477	0.435851	-0.133437	-0.114998	0.0150594	0.253183	-0.0173289	-1.92337	0.999707	Q3KQU3	MAP7 domain-containing protein 1	MAP7D1	MKNATSSKQLPLEPESPSGQVGPRPAPPQEE	70
-0.560086	0.192098	-0.180844	0.443251	-0.637947	0.2466	-0.248064	0.60916	-0.538116	0.448375	-0.263315	0.263315	1	Q3MII6	TBC1 domain family member 25	TBC1D25	ASQGPGGGGRLLRQASLDGLQQLRDNMGSRR	506
-0.820264	0.443671	-0.432417	0.704704	-0.866936	0.312997	-0.314462	0.86997	-0.875895	0.424159	-0.420606	0.781674	0.975341	Q4G0J3	La-related protein 7	LARP7	SSLPEVRTGKRKRSSSEDAESLAPRSKVKKI	300
-0.620441	0.618667	-0.702235	0.849082	-0.559868	0.552718	-0.838749	0.855732	-0.579059	0.581271	-0.685834	0.785657	0.999945	Q4G0J3	La-related protein 7	LARP7	TSISKMKRSRPTSEGSDIESTEPQKQCSKKK	261
-0.204073	0.0308449	-0.0195909	0.307163	-0.00816125	-0.150191	0.0162472	0.257798	-0.041324	0.0127977	-0.00924459	0.237713	1	Q4KMP7	TBC1 domain family member 10B	TBC1D10B	PGLKSRGSRAAGGAPSPPPPVRRASAGPAPG	678
1.06664	-0.897071	0.908325	-3.19179	0.879062	-0.732314	0.73085	-2.07484	0.391467	-0.271197	0.27475	-0.485446	1	Q4LE39	AT-rich interactive domain-containing protein 4B	ARID4B	GFSEVAEKRIKLLNNSDERLQNSRAKDRKDV	912
1.42292	-1.04296	1.05421	-3.05077	0.84915	-0.499483	0.498018	-1.81704	1.26635	-0.819628	0.823181	-2.39264	0.982446	Q4V328	GRIP1-associated protein 1	GRIPAP1	KSRSGLEELVLSEMNSPSRTQTGDSSSISSF	655
0.249784	-0.63081	0.326945	-0.270898	0.361615	-0.368765	0.565155	-0.878074	0.36121	-0.358998	0.52853	-0.43928	1	Q4VC44	FLYWCH-type zinc finger-containing protein 1	FLYWCH1	ALRQREKRPNTAQRGSPGGPEFLKTPLGGSF	503
0.649059	-0.332318	-0.642004	0.332877	1.41999	-0.274689	-0.109087	0.117251	1.22605	-0.267584	-0.199704	0.199704	0.992042	Q53EL6	Programmed cell death protein 4	PDCD4	NAKAKRRLRKNSSRDSGRGDSVSDSGSDALR	71
-0.19102	0.189246	-0.311572	0.887825	-0.268723	0.261573	-0.87156	0.554509	-0.468918	0.326223	-0.32267	0.8394	1	Q53EL6	Programmed cell death protein 4	PDCD4	QLRDLCPSRGRKRFVSEGDGGRLKPESY___	457
-0.655488	0.653714	-1.04838	0.941829	-0.549062	0.541912	-0.559151	0.909227	-0.615665	0.617877	-1.24767	0.738236	0.916169	Q53EL6	Programmed cell death protein 4	PDCD4	DSGSDALRSGLTVPTSPKGRLLDRRSRSGKG	94
-0.320605	0.179358	-0.168104	0.393634	-0.0754642	0.0683143	-0.351209	0.477984	-0.431075	0.401722	-0.398169	0.932305	1	Q53GS9	U4/U6.U5 tri-snRNP-associated protein 2	USP39	VPFVRVKREREVDEDSEPEREVRAKNGRVDS	82
0.477556	-0.47933	0.553204	-1.53146	0.129655	-0.136805	0.245903	-1.54156	0.211972	-0.20976	0.462516	-1.32466	0.999985	Q53HL2	Borealin	CDCA8	TPAAGERIYNISGNGSPLADSKEIFLTVPVG	219
1.82031	-1.82209	2.28537	-2.11742	0.596283	-0.913629	0.665398	-0.593804	0.33903	-0.336818	1.08167	-0.488765	1	Q53HL2	Borealin	CDCA8	TARVKRCPPSKKRTQSIQGKGKGKRSSRANT	154
-0.222851	0.43241	0.212432	-0.333246	-0.340815	0.172612	-0.174077	0.354585	-0.103351	0.302748	0.00974028	-0.00974028	0.999069	Q53LP3	Ankyrin repeat domain-containing protein SOWAHC	SOWAHC	GSSPQLKRSVCPGGSSPGSSSGGGRGRGGGD	226
2.14241	-1.41982	1.43107	-3.78891	1.81707	-1.17264	1.17117	-3.90451	1.579	-1.00943	1.01298	-1.04442	0.999999	Q562F6	Shugoshin-like 2	SGOL2	TQNILELKKYVTDRKSAEQNESKINKLRNKV	895
1.28398	-1.1892	1.20046	-2.78873	0.834735	-0.841885	0.907995	-1.45233	0.742375	-0.718797	0.702791	-0.702791	0.982468	Q56P03	E2F-associated phosphoprotein	EAPP	KTMEDKLSSLGTGSSSGNGKVATAPTRYYDD	89
0.102432	-0.257085	-0.11285	0.139799	-0.0118607	-0.0489601	0.0999849	0.0143397	0.0593674	-0.0571557	-0.108331	0.104115	0.999829	Q58WW2	DDB1- and CUL4-associated factor 6	DCAF6	PRARPESERERDGEQSPNVSLMQRMSDMLSR	336
-2.01447	0.18709	-0.175835	0.997699	-1.23055	-0.0680251	0.0665605	0.563417	-2.09228	0.258976	-0.255423	0.720101	0.924355	Q5BKZ1	DBIRD complex subunit ZNF326	ZNF326	GSYGGQRSMDSYLNQSYGMDNHSGGGGGSRF	56
1.08523	-0.893521	0.904775	-2.00966	0.811109	-0.757951	0.756487	-2.18763	0.839645	-0.763234	0.766787	-1.63233	0.999978	Q5D1E8	Ribonuclease ZC3H12A	ZC3H12A	SEQCSLDGKKLGAQASPGSRQEGLTQTYAPS	386
0.580151	-0.581925	0.916895	-0.652958	0.529289	-0.536439	0.744991	-0.61191	0.441668	-0.439457	0.512144	-0.544061	0.858177	Q5EBL4	RILP-like protein 1	RILPL1	ENRIPQPPPIAHPRTSPQPESGIKRLFSFFS	346
1.41372	-1.4155	1.51308	-2.3959	0.926558	-0.872135	0.870671	-1.21336	0.471015	-0.468804	0.932445	-0.776837	0.848329	Q5F1R6	DnaJ homolog subfamily C member 21	DNAJC21	HARAPSSSSLNSATSSQSKKEKRKNR_____	521
0.835752	-0.566121	0.577375	-1.12461	0.549121	-0.384372	0.382908	-0.906642	0.339062	-0.237939	0.180585	-0.180585	0.960038	Q5H9R7	Serine/threonine-protein phosphatase 6 regulatory subunit 3	PPP6R3	ETAEAKCAAPRPPSSSPEQRTGQPSAPGDTS	853
-0.0418448	0.0400707	-0.718424	0.331831	0.217819	0.0117307	-0.6105	-0.0188023	-0.248265	0.250477	-0.43148	0.51642	1	Q5HYI7	Metaxin-3	MTX3	KLTPAEEENNSFQRLSP______________	311
0.733428	-0.541771	0.553025	-2.33485	0.641153	-0.496931	0.495466	-2.02805	0.71079	-0.604463	0.608016	-1.74053	0.999941	Q5HYJ3	Protein FAM76B	FAM76B	LSKGKKFDKSGSILTSP______________	338
0.437453	-0.293136	0.30439	-1.19114	0.328152	-0.102701	0.101237	-1.60986	0.122406	-0.404531	0.0637561	-0.0637561	1	Q5JRA6	Melanoma inhibitory activity protein 3	MIA3	ASQSTSQDCSQALKQSP______________	1906
0.711649	-0.63171	0.642964	-0.689381	0.660652	-0.667802	0.864231	-1.41508	0.426488	-0.459777	0.435817	-0.427829	0.999337	Q5JSH3	WD repeat-containing protein 44	WDR44	SLDSKGKELSDQATASPIVARTDLSNIPGLL	96
-0.339775	0.626786	-0.352709	0.318662	-0.521947	0.30861	-0.310074	0.516718	-0.427613	0.285775	-0.282222	0.328677	1	Q5JSH3	WD repeat-containing protein 44	WDR44	IMRRTKEYVSNDAAQSDDEEKLQSQPTDTDG	403
0.021285	-0.0230591	0.0517171	-0.217004	0.0676531	-0.000401478	-0.00106313	-0.509848	0.103513	-0.0134129	0.0169659	-0.527751	1	Q5JSH3	WD repeat-containing protein 44	WDR44	TFKETENTAYKVGNESPVQELKQDVSKKIIE	50
0.00406823	0.331191	-0.349904	-0.0251817	-0.103901	0.348581	-0.189387	0.10638	0.0119802	0.385025	-0.264305	-0.0133216	1	Q5JSZ5	Protein PRRC2B	PRRC2B	VAQSNSSEEEAREAGSPAQEFKYQKSLPPRF	613
-0.477294	0.475519	-0.566504	0.777104	-0.316762	0.309612	-0.673027	0.741501	-0.451073	0.453284	-0.478321	0.642223	0.999727	Q5JSZ5	Protein PRRC2B	PRRC2B	SSDFSERRERREGPGSEPDSQVDGGLSGASL	1395
0.340624	-0.342398	-0.761882	0.74934	1.06134	-0.629431	0.627966	-1.08986	0.755881	-0.482573	0.486126	-0.563492	0.995242	Q5JSZ5	Protein PRRC2B	PRRC2B	FADSKQNVPSGGPVPSPQTYRPSSASPSGKP	2153
-0.319922	0.232936	-0.221682	0.538016	-0.174613	0.167463	-0.305047	0.447504	-0.342432	0.254831	-0.251278	0.807382	0.967422	Q5JTD0	Tight junction-associated protein 1	TJAP1	RSPKRMGVHHLHRKDSLTQAQEQGNLLN___	545
-0.64741	0.645636	-0.774494	0.720194	-0.543272	0.536122	-0.899314	0.760999	-0.477668	0.668663	-0.59401	0.476326	1	Q5JTH9	RRP12-like protein	RRP12	PAQGKGDSIEEILADSEDEEDNEEEERSRGK	1080
0.00876969	0.203453	-0.0574781	-0.0298831	0.484574	0.0861411	-0.209701	-0.0932127	0.103856	0.02965	-0.0260969	-0.146162	0.99556	Q5JTV8	Torsin-1A-interacting protein 1	TOR1AIP1	TRLQQQHSEQPPLQPSPVMTRRGLRDSHSSE	143
0.661896	-0.420247	0.425294	-0.433379	0.880363	-0.724435	0.72297	-0.764445	0.534826	-0.380262	0.383815	-0.797461	0.999993	Q5JTV8	Torsin-1A-interacting protein 1	TOR1AIP1	RMQNDSILKSELGNQSPSTSSRQVTGQPQNA	315
0.0183896	-0.0665303	-0.0288082	0.0402267	-0.0644883	0.0573384	-0.0867003	0.21577	0.0519655	-0.0811965	0.0742249	-0.0533069	0.999145	Q5JTV8	Torsin-1A-interacting protein 1	TOR1AIP1	SSHSSVTTVKARSRDSDESGDKTTRSSSQYI	242
-0.380044	0.591485	-0.530128	0.35893	-0.346588	0.339438	-0.437501	0.44756	-0.348495	0.706213	-0.583559	0.347154	0.999995	Q5JWF2	Guanine nucleotide-binding protein G(s) subunit alpha isoforms XLas	GNAS	AKYFIRDEFLRISTASGDGRHYCYPHFTCAV	995
1.11214	-0.765009	0.776263	-1.75511	0.569738	-0.568567	0.567102	-1.33503	0.743776	-0.374304	0.377857	-0.600238	1	Q5M775	Cytospin-B	SPECC1	PLSGIPVRTAPAAAVSPMQRHSTYSSVRPAS	863
-1.10693	1.00849	-0.502825	0.494739	-1.30236	0.819899	-0.643549	0.651713	-0.917653	0.965669	-0.431694	0.431694	0.999934	Q5PRF9	Protein Smaug homolog 2	SAMD4B	LGARAAFTTPDHAPLSPQSSVASSGSEQTEE	271
-1.19204	1.18876	-1.17751	1.22226	-1.1768	0.695738	-0.697203	0.872821	-0.420273	0.422485	-0.920842	0.609694	0.996879	Q5QJE6	Deoxynucleotidyltransferase terminal-interacting protein 2	DNTTIP2	TILRVTRRRQILIACSPVSSVRKKPKVTPTK	117
-1.31891	1.17159	-1.09185	1.08377	-0.969736	1.34401	-1.02522	0.972215	-0.928318	1.01988	-1.22306	0.926977	0.921057	Q5SRE5	Nucleoporin NUP188 homolog	NUP188	LLSSLSRYFRRGAPSSPATGVLPSPQGKSTS	1709
1.36726	-1.16797	1.17923	-1.6461	1.46043	-0.99938	0.997915	-2.49968	1.39987	-1.30214	1.30569	-2.28673	1	Q5SSJ5	Heterochromatin protein 1-binding protein 3	HP1BP3	SRKTPQKSRNRKNRSSAVDPEPQVKLEDVLP	249
-0.107025	0.200944	-0.354462	0.0859113	-0.227221	0.220071	-0.226799	0.299446	-0.162381	0.164592	-0.608873	0.376485	0.999998	Q5SW79	Centrosomal protein of 170 kDa	CEP170	YLKRLKGNKHDDGTQSDSENAGAHRRCSKRA	379
-0.298723	0.296949	-1.5675	0.56149	-0.143671	0.136521	-1.08752	0.80121	-0.198303	0.200515	-1.29206	0.52336	1	Q5SW79	Centrosomal protein of 170 kDa	CEP170	SGQTDKCREETFKQESQPPEKNSGHSTSKGD	785
-0.503093	0.501319	0.853693	-0.633191	-0.643255	0.346963	0.936679	-0.354035	0.157256	-0.155044	0.693623	-0.765042	0.923738	Q5SW79	Centrosomal protein of 170 kDa	CEP170	ETEISESGMTVRSTGSATSLASQGERRRRTL	630
1.52957	-1.37706	1.38831	-2.29433	1.42706	-1.22976	1.22829	-2.46504	1.19186	-1.18965	1.30355	-2.18956	0.933113	Q5SW79	Centrosomal protein of 170 kDa	CEP170	KNSGHSTSKGDRVAQSESKRRKAEEILKSQT	805
-0.145148	0.218961	-0.107024	0.0989385	-0.210226	0.169819	-0.131301	0.139465	-0.0667001	0.344953	-0.100955	0.0653588	0.99981	Q5SXM2	snRNA-activating protein complex subunit 4	SNAPC4	FGGVIPATEPRGTPGSPSGTQEPRGPLGLEK	1224
0.08444	-0.18918	-0.0796902	0.071605	-0.380939	-0.0313335	0.0298689	0.352043	-0.402204	0.0920817	-0.0885286	0.329093	0.99974	Q5T0W9	Protein FAM83B	FAM83B	RKTTNLADRNSNVRRSFNGTDNHIRFLQQRM	466
-0.361093	0.183212	-0.171957	0.510685	-0.205997	0.198847	-0.518255	0.6744	-0.739304	0.283789	-0.280236	0.309337	0.999998	Q5T1M5	FK506-binding protein 15	FKBP15	SEEEEEKAEERPRRPSQEQSASASSGQPQAP	956
-0.46632	0.464546	-0.643906	0.672183	-0.263924	0.256775	-0.423135	0.741651	-0.428138	0.432463	-0.350657	0.350657	0.993807	Q5T200	Zinc finger CCCH domain-containing protein 13	ZC3H13	ERDRRDNRERDQRPSSPIRHQGRNDELERDE	643
-0.437167	0.435392	-0.459497	0.636335	-0.276501	0.269351	-0.317284	0.634437	-0.467554	0.396986	-0.393433	0.577764	1	Q5T200	Zinc finger CCCH domain-containing protein 13	ZC3H13	ERGNIETTSEDGQVFSPKKGQKKKSIEKKRK	993
-0.0560226	-0.499959	0.0555054	0.0349091	-0.00773824	-0.425785	0.0158242	0.237655	-1.03e-05	-0.406818	-0.00225913	0.1087	0.957241	Q5T200	Zinc finger CCCH domain-containing protein 13	ZC3H13	RSSPESDRQVHSRSGSFDSRDRLQERDRYEH	1292
-0.156868	0.0803783	-0.000699997	-0.00738525	-0.0892764	0.0253566	-0.0268212	0.0889106	-0.0125369	0.174391	0.0102675	-0.153509	0.95916	Q5T200	Zinc finger CCCH domain-containing protein 13	ZC3H13	EDAQHRKPMDQKRSSSLGSNRSNRSHTSGRL	1191
0.754809	-0.615111	0.626365	-1.66295	0.731425	-0.66774	0.666276	-2.19189	0.714071	-0.610634	0.614187	-1.60207	0.993999	Q5T2D3	OTU domain-containing protein 3	OTUD3	QGLNEGRTENNKAQASPSEENKANKNQLAKV	326
-0.878255	0.866469	-0.855215	1.27561	-0.75775	0.377217	-0.378682	0.989794	-0.722156	0.668084	-0.664531	0.97796	0.999996	Q5T3I0	G patch domain-containing protein 4	GPATCH4	LTSGGEKPNKDLESCSDDDNQGSKSPKILTD	130
1.554	-1.55578	1.71913	-2.18501	0.993293	-1.00044	1.12418	-1.94092	0.750323	-0.748111	1.33099	-0.959157	1	Q5T3I0	G patch domain-containing protein 4	GPATCH4	TSGLGELNSREQTNQSLRKGKKKKRWHHEEE	286
0.260391	-0.174047	-0.0580119	0.0499266	0.186812	-0.111392	0.109927	-0.262769	0.107274	-0.102766	0.106319	-0.17043	0.964004	Q5T5P2	Sickle tail protein homolog	KIAA1217	ENTVRRQEQPSIESTSPISRTDEIRKNTYRT	1650
1.76552	-1.20609	1.21734	-4.12022	1.49892	-0.948564	0.9471	-3.44827	1.25577	-0.679506	0.683059	-0.846754	0.999989	Q5T6F2	Ubiquitin-associated protein 2	UBAP2	SFPSQAKLRESTPGDSPSTVNKLLQLPSTTI	473
2.25845	-1.7753	1.78655	-3.82398	2.15222	-1.53988	1.53842	-3.56635	1.26311	-0.890664	0.894217	-1.35629	0.999982	Q5T6F2	Ubiquitin-associated protein 2	UBAP2	SSVLSHLDFKSQPEPSPVLSQLSQRQQHQSQ	432
-0.377779	0.376005	-0.813076	0.447862	-0.484768	0.477618	-0.957401	0.608695	-0.342229	0.433216	-1.05515	0.340888	0.971436	Q5T7B8	Kinesin-like protein KIF24	KIF24	CCTSVTSRNRTSGNSSPKRIQSSPGALSEDK	567
-0.588349	0.621146	-0.623269	0.567235	-0.580126	0.364066	-0.365531	0.667509	-0.393276	0.317986	-0.314433	0.443805	1	Q5T8P6	RNA-binding protein 26	RBM26	KEEEREKKFSRRLNHSPPQSSSRYRENRSRD	127
1.08662	-0.960144	0.971398	-1.62948	0.841199	-0.824891	0.823427	-1.71075	0.929079	-0.802287	0.80584	-1.40765	0.991364	Q5T8P6	RNA-binding protein 26	RBM26	TKKTWFDKPNFNRTNSPGFQKKVQFGNENTK	518
-0.416294	0.41452	-1.19861	0.547885	0.00263226	0.163822	-1.12288	-0.000153298	-0.495556	0.374743	-0.37119	0.487978	1	Q5TAQ9	DDB1- and CUL4-associated factor 8	DCAF8	TGHYSINDENRVHDRSEEEEEEEEEEEEEQP	99
0.0747439	0.466467	-0.0851624	-0.308024	-0.145272	0.372531	-0.209041	0.14775	0.238651	0.499899	-0.24092	-0.492674	1	Q5TAX3	Terminal uridylyltransferase 4	ZCCHC11	VNIEAVGGEKCALQNSPRSQKQQTCTDNTGD	209
-0.471122	0.469347	-0.504672	0.977149	-0.463461	0.144339	-0.145804	0.569251	-0.718502	0.720714	-0.853692	1.42223	0.999017	Q5TCZ1	SH3 and PX domain-containing protein 2A	SH3PXD2A	SAAAEAKGRLAERAASQGSDSPLLPAQRNSI	1038
0.943424	-0.734934	0.746188	-0.885468	1.13518	-0.803099	0.801634	-1.02905	0.0264339	-0.564248	0.0879804	-0.0277752	0.999997	Q5TCZ1	SH3 and PX domain-containing protein 2A	SH3PXD2A	AKGRLAERAASQGSDSPLLPAQRNSIPVSPV	1043
-1.15012	-0.159238	0.170492	0.798425	-0.582343	-0.139021	0.137556	0.186091	-0.743802	0.16165	-0.158097	0.41827	0.973136	Q5TCZ1	SH3 and PX domain-containing protein 2A	SH3PXD2A	AKPSVRPKPFLNRAESQSQEKMDISTLRRQL	767
0.174087	-0.320124	0.203945	-0.1952	0.200473	-0.252019	0.234163	-0.197994	0.151088	-0.235159	0.236927	-0.152429	0.996511	Q5TCZ1	SH3 and PX domain-containing protein 2A	SH3PXD2A	SPAVARIAPQRAQISSPNLRTRPPPRRESSL	421
-0.348342	0.291508	-0.280253	0.413982	-0.367733	0.286443	-0.287908	0.531098	-0.373701	0.309293	-0.30574	0.310733	0.999998	Q5TCZ1	SH3 and PX domain-containing protein 2A	SH3PXD2A	KEAEEGPTGASESQDSPRKLKYEEPEYDIPA	547
0.68229	-0.588733	0.599988	-1.03228	0.348147	-0.355297	0.566861	-0.6042	0.679266	-0.531483	0.535036	-0.969815	0.997751	Q5TCZ1	SH3 and PX domain-containing protein 2A	SH3PXD2A	AEDTLSARGSSGDSDSPGSSSLSLTRKNSPK	644
0.778994	-1.0413	0.884569	-0.800108	0.761527	-0.768677	0.812602	-1.15123	0.52275	-0.669426	0.645161	-0.524091	1	Q5TCZ1	SH3 and PX domain-containing protein 2A	SH3PXD2A	AVGVPDRTVSRLAQGSPAVARIAPQRAQISS	406
0.466504	-0.468278	0.553	-1.13602	0.449977	-0.263794	0.262329	-1.9877	0.724842	-0.474619	0.478172	-1.54616	0.994842	Q5THJ4	Vacuolar protein sorting-associated protein 13D	VPS13D	RYAAPDKNSSSSTIGSPSSRTNIIHPQVYFS	3010
0.0899277	-0.1162	0.580614	-0.111041	0.0794255	-0.223855	0.772663	-0.0769465	0.207599	-0.406039	0.736137	-0.208941	0.99999	Q5U3C3	Transmembrane protein 164	TMEM164	ALRHILRQTKEDGRGSPGSQPEQVTQRPEEG	71
0.532319	-0.315412	0.326666	-0.442554	0.449221	-0.569345	0.537022	-0.446742	0.472705	-0.328827	0.33238	-0.639801	0.999952	Q5U4P2	Aspartate beta-hydroxylase domain-containing protein 1	ASPHD1	GVRGGPVGCSEAGGPSPGGPGDPGEGPRTEG	129
0.0604522	0.62554	-0.0963274	-0.0815656	-0.0140468	0.543834	0.0221328	-0.332911	0.0241481	0.461059	-0.0264175	-0.336685	0.990305	Q5UIP0	Telomere-associated protein RIF1	RIF1	QKLRELDPSLVSANDSPSGMQTRCVWSPLAS	2161
-0.567926	0.016914	-0.00565991	0.690057	-0.434399	-0.200872	0.199407	0.568935	-0.562661	-0.0482758	0.0518288	0.227265	1	Q5UIP0	Telomere-associated protein RIF1	RIF1	SRKKRSGKWKNKSNESVDIQDQEEKVVKQEC	1579
-0.141044	0.13927	-0.324367	0.530179	-0.080986	0.0738361	-0.128867	0.398383	0.146808	0.0283823	-0.204611	-0.0239011	1	Q5UIP0	Telomere-associated protein RIF1	RIF1	NLRTRNAIKRLHKRDSFDNCSLGESSKIGIS	1688
0.174305	-0.375117	0.111179	-0.119264	0.138904	-0.0786499	0.0771853	-0.823545	0.250874	-0.0901155	0.0936686	-0.841823	0.927908	Q5UIP0	Telomere-associated protein RIF1	RIF1	SILKRGLKRSQEDEISSPVNKVRRVSFADPI	2195
0.293229	-0.236144	0.113902	-0.121987	0.30933	-0.0120728	0.0106082	-0.653443	0.222775	-0.0503035	0.0538565	-0.81508	0.994513	Q5UIP0	Telomere-associated protein RIF1	RIF1	ILKRGLKRSQEDEISSPVNKVRRVSFADPIY	2196
-0.337574	0.44654	-0.324943	0.316461	-0.30899	0.291168	-0.292633	0.510673	-0.117189	0.214127	-0.298705	0.115848	0.999994	Q5VSL9	Striatin-interacting protein 1	STRIP1	LPEDSIKVIRNMRAASPPASASDLIEQQQKR	335
0.750279	-0.299859	0.311113	-0.6409	0.950681	-0.304371	0.302907	-0.854906	0.735391	-0.207421	0.210974	-0.401627	0.999997	Q5VT06	Centrosome-associated protein 350	CEP350	EEMLKERQSDQDMNHSPNIQSGKDIHEQKNT	2341
-0.0583242	-0.416621	0.0479057	0.364559	0.237201	-0.439129	0.646248	-0.234722	-0.107913	-0.0459784	0.0495314	0.348258	1	Q5VT52	Regulation of nuclear pre-mRNA domain-containing protein 2	RPRD2	PIETLGYHSASNRRMSGEPIQTVESIRVPGK	1099
-0.174962	0.173188	-0.28677	0.436669	-0.152725	0.145575	-0.226967	0.620381	0.153629	0.279646	-0.155899	-0.863837	0.945995	Q5VT52	Regulation of nuclear pre-mRNA domain-containing protein 2	RPRD2	LPSSAQPFIPKSFNYSPNSSTSEVSSTSASK	593
0.071416	-0.262358	0.667696	-0.0925295	-0.737046	0.276279	-0.277744	0.808533	-0.0722566	-0.150026	0.588479	0.0709152	0.999996	Q5VTL8	Pre-mRNA-splicing factor 38B	PRPF38B	HSDSKDQSDKHDRRRSQSIEQESQEKQHKNK	527
-1.60579	1.33134	-1.32009	1.87006	-1.12296	0.355997	-0.357462	1.0635	-0.453818	0.442636	-0.439083	0.903405	0.999984	Q5VTL8	Pre-mRNA-splicing factor 38B	PRPF38B	DSKDQSDKHDRRRSQSIEQESQEKQHKNKDE	529
-0.290471	0.288697	-0.336565	0.431142	-0.2227	0.33028	-0.307268	0.225179	-0.0663829	0.175246	-0.223288	0.0650416	1	Q5VUA4	Zinc finger protein 318	ZNF318	NLYQWGPLPGIPKDNSPLREKFGSFLCHKDN	464
-0.326225	0.840852	-0.515485	0.305112	-0.381742	0.743173	-0.752937	0.384221	-0.190841	0.708209	-0.367299	0.189499	0.995103	Q5VWG9	Transcription initiation factor TFIID subunit 3	TAF3	LETKSFTPKTKTKTSSPGQKTKSPKTAQSPA	278
-0.89154	0.999174	-1.17842	0.870427	-0.912345	0.905257	-1.24724	0.914824	-0.945264	1.07815	-1.2343	0.943923	0.944102	Q5VWQ0	Round spermatid basic protein 1	RSBN1	PHAGVSPRGVKRQRRSSSGGSQEKRGRPSQE	91
-0.759612	0.771226	-1.04448	0.738499	-0.731118	0.855995	-0.984576	0.733597	-0.678047	0.680259	-0.955346	0.67968	0.95391	Q5VWQ0	Round spermatid basic protein 1	RSBN1	HAGVSPRGVKRQRRSSSGGSQEKRGRPSQEP	92
-0.173403	0.171629	-0.2899	0.170618	-0.376593	0.385572	-0.522838	0.379072	-0.272734	0.361309	-0.333911	0.271393	0.896793	Q5VYV7	Protein SLX4IP	SLX4IP	IAEIARRRNDGQASSSPPSESMGQAKDSIKA	213
-1.23467	0.841118	-0.654128	0.646043	-0.628489	0.795285	-0.672344	0.630968	-0.640573	0.36396	-0.160755	0.160755	0.932372	Q5VZK9	Leucine-rich repeat-containing protein 16A	LRRC16A	PVLKKVPSDKERDGQSSPQPSPRTFSQEVSR	1314
-1.23298	0.804674	-0.654283	0.646197	-0.452738	0.600381	-0.732374	0.455217	-0.727038	0.537342	-0.42952	0.42952	0.940687	Q5VZK9	Leucine-rich repeat-containing protein 16A	LRRC16A	VLKKVPSDKERDGQSSPQPSPRTFSQEVSRR	1315
-0.375171	0.373397	-0.373697	0.43313	-0.300458	0.293309	-0.436615	0.530066	-0.100995	0.146231	-0.421245	0.0996542	0.974299	Q5VZK9	Leucine-rich repeat-containing protein 16A	LRRC16A	QGEEIGKVERSDSKSSPQAGRRYGVQVMGSG	1151
-0.208766	0.206992	-0.230431	0.541641	-0.328325	0.204183	-0.205648	0.591604	-0.148989	0.151201	-0.247555	0.283068	0.998778	Q5VZL5	Zinc finger MYM-type protein 4	ZMYM4	EQGDLKCGGVEQASSSPRSDPLGSTQDHALS	1241
-0.732679	0.542306	-0.531052	0.609596	-0.421586	0.414436	-0.432453	0.79911	-0.372036	0.4101	-0.506503	0.370695	0.999994	Q5VZL5	Zinc finger MYM-type protein 4	ZMYM4	TDDSLEVERRVTQHESDNENEIQIQNKLKKD	122
0.0589398	0.0345065	-0.0232524	-1.34258	0.074446	0.136071	-0.06636	-1.98679	0.0933854	0.0734723	-0.0699192	-1.72391	0.999991	Q641Q2	WASH complex subunit FAM21A;WASH complex subunit FAM21C	FAM21A;FAM21C	FGDEEGDLFKEKAVASPEATVSQTDENKARA	498
-0.634591	0.632817	-0.779148	0.807844	-0.563006	0.555856	-0.971916	0.699928	-0.69419	0.696402	-1.0101	0.784805	1	Q641Q2	WASH complex subunit FAM21A;WASH complex subunit FAM21C	FAM21A;FAM21C	KPRKTLKEKKERRTPSDDEEDNLFAPPKLTD	333
-0.396369	0.398316	-0.456893	0.375255	-0.301989	0.294839	-0.826436	0.493247	-0.299549	0.301761	-0.589245	0.411922	1	Q659C4	La-related protein 1B	LARP1B	KENRETKLNGPGENVSEDEAQSSNQRKRANK	60
-0.931281	1.29454	-0.715286	0.707201	-1.39449	1.54315	-2.27623	1.39697	-1.36037	1.36258	-1.81089	1.37804	0.923776	Q66K14	TBC1 domain family member 9B	TBC1D9B	SPAPQEGSEQPASPASPLSSRQSFCAQEAPT	435
0.222859	-0.154389	0.165643	-0.430332	0.287811	-0.29496	0.345844	-0.809635	0.357256	-0.258957	0.26251	-0.716769	0.963396	Q66K14	TBC1 domain family member 9B	TBC1D9B	EGSGSEERGEEKGTSSPDYRHYLRMWAKEKE	995
-0.265678	0.263903	-0.357765	0.320184	-0.191162	0.220914	-0.243854	0.193641	-0.387053	0.389264	-0.559426	0.977917	0.999435	Q66K74	Microtubule-associated protein 1S;MAP1S heavy chain;MAP1S light chain	MAP1S	EFEHRKAVPMAPAPASPGSSNDSSARSQERA	759
-0.311945	0.302579	-0.291325	0.853094	-0.519945	0.463176	-0.464641	0.628407	-0.358362	0.454574	-0.358472	0.357021	1	Q66PJ3	ADP-ribosylation factor-like protein 6-interacting protein 4	ARL6IP4	QVEALPGPSLDQWHRSAGEEEDGPVLTDEQK	148
-0.279312	0.210376	0.303234	-0.209817	-0.185952	0.156552	0.0233058	-0.0151415	-0.216562	-0.100821	0.201926	0.105302	0.988676	Q68CZ2	Tensin-3	TNS3	RGVGSGPHPPDTQQPSPSKAFKPRFPGDQVV	660
-0.117685	0.657514	-0.662442	0.0965715	-0.256111	0.63971	-0.268442	0.25859	-0.120025	0.617355	-0.500786	0.118684	0.999961	Q68DQ2	Very large A-kinase anchor protein	CRYBG3	SDGSDTTEQESTNLPSPNKSIRHEHLQLPES	457
-0.410104	0.236103	-0.224849	0.650986	-0.431248	0.294502	-0.295967	0.747281	-0.341193	0.203146	-0.199593	0.63586	0.997716	Q68E01	Integrator complex subunit 3	INTS3	SSTKPPKSRRKAALSSPRSRKNATQPPNAEE	995
0.863182	-0.607485	0.618739	-2.11205	0.805865	-0.386759	0.385294	-2.00544	0.897539	-0.493457	0.49701	-1.98326	0.999939	Q69YH5	Cell division cycle-associated protein 2	CDCA2	KNKSESENEPKAGTDSPVSCASVTEERVASD	710
-0.518327	0.443079	-0.431825	0.600209	-0.339009	0.331859	-0.358544	0.604121	-0.370172	0.308791	-0.305238	0.468441	1	Q69YN4	Protein virilizer homolog	KIAA1429	NPKHADGEKEDQFNGSPPRPQPRGPRTPPGP	173
-0.460633	0.458858	-0.630037	0.701058	-0.428745	0.421595	-0.633828	0.810331	-0.403133	0.405344	-0.522429	0.572685	0.999991	Q69YN4	Protein virilizer homolog	KIAA1429	DLHSELERSFLSEPSSPGRTKTTKGFKLGKH	1579
-0.372831	0.0426956	-0.0314415	0.442217	-0.629609	0.019682	-0.0211466	0.520744	-0.522928	0.239732	-0.236179	0.251448	0.955397	Q69YQ0	Cytospin-A	SPECC1L	SESEGIPSIERSRKGSSGNASEVSVACLTER	384
0.399879	0.00758131	0.00367278	-0.863025	0.45337	0.154704	-0.156168	-0.507561	0.417062	-0.164955	0.168508	-0.338407	0.7816	Q6AW86	Zinc finger protein 324B	ZNF324B	DACHSVKSLQRQPGASPSQERKPTGVSVIYW	129
0.628053	-0.629827	0.660229	-1.34576	0.67313	-0.594675	0.59321	-0.59481	0.719464	-0.704552	0.663491	-0.663491	0.968003	Q6DCA0	AMMECR1-like protein	AMMECR1L	SGRENVSDLTLGPGNSPITRMNPASGALSPL	74
0.249879	-0.150733	0.161987	-0.535822	0.271132	-0.0479582	0.0464936	-0.422385	0.323624	-0.186787	0.19034	-0.339594	1	Q6DN90	IQ motif and SEC7 domain-containing protein 1	IQSEC1	KRQSAYERSLGGQQGSPKHGPHSGAPKSLPR	417
-0.551292	0.870915	-0.895579	0.530179	-0.646716	0.705648	-0.740258	0.649195	0.0679111	1.04451	-0.413304	-0.0692524	0.98479	Q6GQQ9	OTU domain-containing protein 7B	OTUD7B	ASAGDEPRSTPESGDSDKESVGSSSTSNEGG	467
-0.606554	0.490901	-0.280123	0.272038	-0.525047	0.496092	-0.456799	0.464964	-0.392922	0.363103	-0.249841	0.249841	0.999993	Q6IBW4	Condensin-2 complex subunit H2	NCAPH2	EASAPKAALEPKESRSPQQSAALPRRYMLRE	284
2.00529	-2.00707	2.19703	-3.49827	1.81259	-1.76232	1.76085	-3.10676	0.0158702	-0.334416	0.286768	-0.0172115	0.819897	Q6IBW4	Condensin-2 complex subunit H2	NCAPH2	ALDFISGKRRAKQLSSVQEDRANGVASSGVP	96
0.521663	-0.328275	0.33953	-0.702212	0.109526	-0.251941	-0.0152843	0.0234486	0.39775	-0.163209	0.166762	-0.185247	1	Q6IQ22	Ras-related protein Rab-12	RAB12	ALQRRAGGGGGLGAGSPALSGGQGRRRKQPP	21
-0.0305933	0.0288192	0.143957	-0.323892	-0.00882489	0.201274	0.0169109	-0.247904	-0.0286001	0.249754	0.0263307	-0.307072	0.999998	Q6IQ49	Protein SDE2 homolog	SDE2	PSGSQRARVVNTDHGSPEQLQIPVTDSGRHI	278
-0.533283	1.17917	-0.93927	0.51217	-0.625353	0.497681	-0.499146	0.544816	-0.628586	0.208438	-0.204885	0.413386	1	Q6KC79	Nipped-B-like protein	NIPBL	GSPKNNTAAETEDDESDGEDRGGGTSGSLRR	2672
-0.56511	0.260121	-0.129311	0.121225	-0.051515	-0.158817	0.059601	0.316036	-1.03343	0.162442	-0.158888	0.301348	0.991847	Q6NUJ5	PWWP domain-containing protein 2B	PWWP2B	APEEGDAEVMQLGSSSPPPARGVQPPETTRP	84
-0.465516	0.692076	-0.697534	0.444403	-0.541924	0.722016	-0.777378	0.544403	-0.412756	0.629452	-0.929635	0.411415	1	Q6NXT1	Ankyrin repeat domain-containing protein 54	ANKRD54	GGGAGLSGRASGGAQSPLRYLHVLWQQDAEP	63
1.39295	-1.07723	1.08848	-2.20803	0.823795	-0.614868	0.613403	-0.836673	0.482776	-0.546244	0.324627	-0.324627	1	Q6NYC8	Phostensin	PPP1R18	QELSLRPLEARDWRQSPGEVGDRSSRLSEAW	175
0.638579	-0.640353	0.689765	-1.34638	0.530675	-0.537825	0.613786	-1.20045	0.563241	-0.528105	0.531658	-0.856099	0.9606	Q6NZY4	Zinc finger CCHC domain-containing protein 8	ZCCHC8	DISNGGSQKLFPADTSPSTATKIHSPIPDMS	649
-0.0280752	0.0263011	-0.463498	0.636577	-0.171011	0.163861	-0.567278	0.348975	-0.207132	0.144584	-0.141031	0.505207	1	Q6P158	Putative ATP-dependent RNA helicase DHX57	DHX57	KALLRDLQEQDADAGSERGLSGEEEDDEPDC	127
-0.665813	0.55487	-0.543616	0.829031	-0.868923	0.452407	-0.453871	0.882323	-0.634696	0.77436	-0.614052	0.614052	1	Q6P158	Putative ATP-dependent RNA helicase DHX57	DHX57	DLQEQDADAGSERGLSGEEEDDEPDCCNDER	132
0.338243	-0.248324	0.259578	-0.965171	0.255165	-0.262315	0.385078	-0.74491	0.170248	-0.0225136	0.00319785	-0.00319785	0.949719	Q6P1L5	Protein FAM117B	FAM117B	APVCKAGDKTRQPSSSPSSIIRRTSSLDTLA	210
-0.428493	0.315593	-0.304338	0.564152	-1.00611	0.494471	-0.495935	1.0292	-1.06956	0.68002	-0.676467	0.80121	0.998531	Q6P1M3	Lethal(2) giant larvae protein homolog 2	LLGL2	GNGAGPKKAPSRARNSGTQSDGEEKQPGLVM	961
-0.377046	0.375272	-0.59302	0.725078	-0.545735	0.538585	-0.552641	0.960228	-0.54611	0.548322	-0.602578	1.13665	0.999946	Q6P2E9	Enhancer of mRNA-decapping protein 4	EDC4	HLLQQRDSQDASAEQSDHDDEVASLASASGG	879
0.267426	-0.138675	0.149929	-1.77464	0.0967212	-0.092483	0.0910184	-2.1008	0.154345	-0.025631	0.0291841	-0.762596	1	Q6P2E9	Enhancer of mRNA-decapping protein 4	EDC4	TAPDITRETCSTLAESPRNGLQEKHKSLAFH	844
-1.1628	0.0269856	-0.0157315	0.619447	-0.778951	-0.0843408	0.0828762	0.289218	0.00789613	-0.00568437	0.124124	-0.155086	0.980963	Q6P4F7	Rho GTPase-activating protein 11A	ARHGAP11A	TNLSKPRPMRIAKQQSLETCEKTVSESSQMT	787
-0.984699	-0.186631	0.197885	0.638871	-0.615383	-0.170593	0.224207	0.163521	-0.768186	0.0235685	-0.0200154	0.392319	0.966926	Q6P4F7	Rho GTPase-activating protein 11A	ARHGAP11A	ESGSNLHALMNQRQSSVTNVGKVKLTEPSYL	620
-0.234638	0.282218	-0.31285	0.213524	-0.171982	0.164832	-0.213118	0.516346	-0.343171	0.345383	-0.403233	0.430739	0.999741	Q6P5R6	60S ribosomal protein L22-like 1	RPL22L1	TYELRYFQISQDEDESESED___________	118
-0.0137207	0.0119466	-0.38665	0.302098	0.202455	0.0598852	-0.16212	-0.0669568	-0.14789	0.35266	-0.288518	0.146549	0.999653	Q6PCE3	Glucose 1,6-bisphosphate synthase	PGM2L1	AVQKLKAVAGVMITASHNRKEDNGYKVYWET	175
-0.557669	0.555895	-0.666332	0.67435	-0.47514	0.46799	-0.594175	0.763668	-0.485848	0.457341	-0.453788	0.508057	1	Q6PD62	RNA polymerase-associated protein CTR9 homolog	CTR9	RKKKKRRRHPKGEEGSDDDETENGPKPKKRR	970
-0.519609	1.28066	-0.970746	0.498496	-0.62178	0.28864	-0.290105	0.425451	-0.437919	0.54015	-0.805338	0.436577	1	Q6PD62	RNA polymerase-associated protein CTR9 homolog	CTR9	DDDLPISKKKKRRKGSGSEQEGEDEEGGERK	941
-0.658726	0.723948	-1.17556	0.637612	-0.69515	0.688	-0.707811	0.888862	-0.701546	0.703758	-1.45992	0.893149	0.995355	Q6PD62	RNA polymerase-associated protein CTR9 homolog	CTR9	AGSPRRPRRQRSDQDSDSDQPSRKRRPSGSE	1085
0.221793	-0.235517	0.153145	-0.16123	0.780329	-0.0514283	-0.0737243	0.0443567	1.72683	-0.584063	0.587616	-1.43725	0.999456	Q6PD62	RNA polymerase-associated protein CTR9 homolog	CTR9	SDQPSRKRRPSGSEQSDNESVQSGRSHSGVS	1102
-0.43542	1.32388	-0.368066	0.359981	-0.456803	1.19783	-0.643304	0.459282	-0.748007	1.82196	-1.98094	0.746665	0.999785	Q6PGQ7	Protein aurora borealis	BORA	TQRCWMKTASPFQCSSP______________	558
-0.951237	1.03991	-0.582244	0.574159	-1.49479	0.889797	-0.46942	0.477584	-0.309991	0.636168	-0.246458	0.246458	0.882332	Q6PJF5	Inactive rhomboid protein 2	RHBDF2	ESSEKRPGFRRQASLSQSIRKGAAQWFGVSG	115
0.564839	-0.566614	0.624867	-0.928886	0.0487767	-0.478645	0.292008	-0.0462978	0.593856	-0.591644	0.687888	-0.827128	0.998213	Q6PJG6	BRCA1-associated ATM activator 1	BRAT1	RDKIASYSSLREARGSPNTASAEATLPRWRA	742
-0.0500102	0.0482361	-0.389093	0.541765	-0.125095	0.117945	-0.617876	0.641082	0.0619893	-0.0597776	-0.664614	0.235565	0.948288	Q6PJT7	Zinc finger CCCH domain-containing protein 14	ZC3H14	PSARPEKRDSRVSTSSQESKTTNVRQTYDDG	135
-0.792754	0.79098	-0.835791	0.863406	-0.717445	0.645619	-0.647083	0.840853	-0.761955	0.55055	-0.546997	0.634819	1	Q6PK04	Coiled-coil domain-containing protein 137	CCDC137	AGRGAAVSRVQAGPGSPRRARGRQQVQPLGK	19
0.610231	-0.610595	0.62185	-1.292	0.658854	-0.481149	0.479684	-1.3963	0.350099	-0.214511	0.218064	-0.789541	0.923858	Q6PKG0	La-related protein 1	LARP1	DMKEQEKGEGSDSKESPKTKSDESGEEKNGD	220
-0.776659	1.37829	-0.555808	0.547723	-1.01524	0.439772	-0.441236	0.87276	-0.34599	0.420067	-0.108432	0.108432	1	Q6PKG0	La-related protein 1	LARP1	VPRQHYQKETESAPGSPRAVTPVPTKTEEVS	521
0.329635	-0.331409	0.506994	-0.366072	0.231513	-0.238663	0.253489	-0.507852	0.111817	-0.444789	0.381093	-0.113158	0.999727	Q6PKG0	La-related protein 1	LARP1	TKNALPPVLTTVNGQSPPEHSAPAKVVRAAV	143
-0.403845	0.402071	-0.656073	0.586278	-1.28012	1.27297	-2.82472	1.70081	-0.683927	0.626497	-0.622944	1.04544	0.99999	Q6PKG0	La-related protein 1	LARP1	EGSDSKESPKTKSDESGEEKNGDEDCQRGGQ	228
-0.0333841	0.0514593	0.0229656	-0.149042	-0.614861	0.152356	-0.15382	0.497746	0.0514114	0.0113569	-0.0411393	-0.00687564	1	Q6PKG0	La-related protein 1	LARP1	EPSTIARSLPTTVPESPNYRNTRTPRTPRTP	774
-0.261302	-0.519208	0.250884	0.988294	-0.379131	-0.967889	0.387217	1.23088	-0.457125	0.0512244	-0.0476713	0.846941	0.999196	Q6PL18	ATPase family AAA domain-containing protein 2	ATAD2	TGESSVEENEKQQNASESKLELRNNSNTCNI	1233
1.59178	-0.752446	0.7637	-1.61767	1.79022	-0.506202	0.504738	-1.27686	1.0903	-0.521248	0.360721	-0.360721	1	Q6PL18	ATPase family AAA domain-containing protein 2	ATAD2	EGKEMCVLRMTRARRSQVEQQQLITVEKALA	1302
-0.322196	0.320421	-0.462457	0.387864	-0.0644667	0.0573167	-0.422586	0.0950025	0.388414	0.0336625	-0.0301094	-0.186987	1	Q6R327	Rapamycin-insensitive companion of mTOR	RICTOR	RGRSLKNLRVRGRNDSGEENVPLDLTREPSD	21
-0.780973	-0.331717	0.755503	0.332276	-0.77297	-2.54122	2.36974	0.775449	-0.147385	0.149596	2.83584	-0.636345	0.849481	Q6RI45	Bromodomain and WD repeat-containing protein 3	BRWD3	KQKQMKLQPKNDQNTSVSHARTSSPFSSPVS	1485
1.89948	-1.90125	2.12393	-3.07753	1.00775	-1.0149	1.22309	-1.62157	0.86599	-0.863778	0.940593	-1.35629	0.995786	Q6UVJ0	Spindle assembly abnormal protein 6 homolog	SASS6	TFPHSISAKNTSHPGSGTKVQFNLQFTKPNA	555
1.35623	-1.35801	1.63833	-2.06967	1.11197	-1.11912	1.39353	-1.78696	1.22772	-1.22551	1.54657	-1.99723	0.999835	Q6WCQ1	Myosin phosphatase Rho-interacting protein	MPRIP	LRTLLTGDGGGEATGSPLAQGKDAYELEVLL	891
1.53736	-1.38326	1.39451	-1.99911	1.76696	-1.3009	1.29943	-2.25796	1.25369	-1.24991	1.25347	-1.87936	1	Q6XZF7	Dynamin-binding protein	DNMBP	___________MEAGSVVRAIFDFCPSVSEE	5
-0.0498122	-0.634301	0.148199	0.0286988	0.131343	-0.138493	0.346011	-0.191418	0.00944347	-0.00723171	0.313249	-0.022978	0.99809	Q6Y7W6	PERQ amino acid-rich with GYF domain-containing protein 2	GIGYF2	EVGPRNSTNKNKNNASLSKSVGVSNRQNKKV	1100
-0.0709786	-0.0231664	0.12013	0.0237255	-0.0438712	0.0367213	-0.0900468	0.0963259	0.1434	-0.0917582	0.0417439	-0.0417439	0.998088	Q6ZN18	Zinc finger protein AEBP2	AEBP2	VGSSGGSSSDETRSLSPGAASSSSGDGDGKE	141
1.58798	-1.56767	1.57893	-3.41237	1.39331	-1.40046	1.51689	-3.44546	1.26592	-1.25201	1.25556	-2.0451	0.989122	Q6ZNB6	NF-X1-type zinc finger protein NFXL1	NFXL1	GGREKGSVGAVPSGTSPGGVATTAAAGSRHS	50
-0.599914	0.59814	-0.73125	0.694266	-0.664936	0.645118	-0.646583	0.852371	-0.656285	0.564776	-0.561223	0.72361	0.978103	Q6ZRP7	Sulfhydryl oxidase 2	QSOX2	GRDNLLDTYSADQGDSSEGGTLARGEEEEKR	578
0.00236517	-0.738638	0.409578	-0.0234786	0.175558	-0.642286	0.391592	-0.173079	-0.06547	-0.515934	0.391229	0.0641287	1	Q6ZRV2	Protein FAM83H	FAM83H	PVPQENGQPESPRRLSLGQGDSTEAATEERG	1003
0.269707	-0.377258	0.640205	-0.290821	0.165313	-0.520805	0.788091	-0.162834	0.0157393	-0.400621	0.744999	-0.0170806	1	Q6ZRV2	Protein FAM83H	FAM83H	VPAAFPTKVPVPGPGSGGNGPEREGPEEPGL	647
1.20084	-1.20262	1.2852	-2.46249	1.14102	-1.14817	1.17803	-3.14934	1.24369	-1.24148	1.33897	-2.40825	0.999994	Q6ZS17	Protein FAM65A	FAM65A	LRDGAYNMVRAYTTGSPGSREARDSLAEATR	171
0.322096	-0.349716	0.107321	-0.115407	0.475446	-0.414569	0.413105	-0.847664	0.104065	-0.359543	0.261509	-0.105407	0.999999	Q6ZSS7	Major facilitator superfamily domain-containing protein 6	MFSD6	SEIQPLQGTNENRENSPAGRAQPVPCETHSD	733
0.199974	-0.0911527	0.102407	-0.544485	0.394639	-0.214934	0.213469	-0.592843	0.557509	-0.230098	0.233651	-0.560745	1	Q6ZUM4	Rho GTPase-activating protein 27	ARHGAP27	SIHKSSQDGDTPAQASPPEEKVPAELDEVGS	466
0.299161	-0.300935	0.620137	-0.913435	0.15074	-0.15789	0.592944	-0.803398	0.247463	-0.245251	0.413812	-0.302898	1	Q6ZUT6	Uncharacterized protein C15orf52	C15orf52	VSEKPTRARNQGIEGSPGGRVTRSPPTQVAI	193
-0.750017	0.158562	-0.147308	0.439752	-0.526671	0.139382	-0.140847	0.642307	-0.683112	0.107012	-0.103459	0.415066	0.998383	Q6ZW31	Rho GTPase-activating protein SYDE1	SYDE1	DPEVVTRPRGRGGPESPPSNRYAGDWSVCGR	645
0.578552	-0.580326	0.642043	-1.65907	0.601314	-0.500228	0.498764	-1.96704	0.201037	-0.281071	0.239717	-0.202379	0.887725	Q6ZW76	Ankyrin repeat and SAM domain-containing protein 3	ANKS3	PPRAATDREGFLAESSPQTQRAPYSGPQDLA	416
-0.0495434	0.573502	-2.76635	0.02843	-0.129136	0.552802	-3.33888	0.131615	0.0888983	0.538282	-2.46158	-0.0902396	0.999883	Q70CQ2	Ubiquitin carboxyl-terminal hydrolase 34	USP34	RDSSIIDPGTEQDLPSPENSSVKEYRMEVPS	3406
0.113812	0.621021	-0.124231	-0.19841	-0.288138	0.12988	-0.0506768	0.0588411	-0.106219	0.10843	-0.39019	0.111763	0.989097	Q71RC2	La-related protein 4	LARP4	VSPPSTTKPSRASTASPCNNNINAATAVALQ	597
0.273406	0.139804	-0.12855	-0.564336	0.180093	0.106869	-0.108333	-0.413997	0.323588	0.0215587	-0.0180056	-0.638583	0.977287	Q76L83	Putative Polycomb group protein ASXL2	ASXL2	KPATWEGKQSDGQTGSPQNSNSSFSSSVKVE	224
-0.360016	1.02718	-0.60105	0.338902	-0.47864	0.368217	-0.369681	1.11933	-0.167063	0.169274	-0.395322	0.579771	0.997207	Q7L014	Probable ATP-dependent RNA helicase DDX46	DDX46	RRSRSRSRGRRSRSSSPGNKSKKTENRSRSK	106
-0.745701	1.25332	-0.837388	0.724587	-0.642235	0.635085	-1.21326	0.649456	-0.504912	0.507124	-0.8811	0.605845	0.9998	Q7L1Q6	Basic leucine zipper and W2 domain-containing protein 1	BZW1	QMKKFVEWLKNAEEESESEAEEGD_______	411
0.946163	-0.947937	1.19485	-1.18231	1.07268	-1.07983	1.44676	-1.70605	1.06574	-1.06353	1.46068	-1.36803	0.999797	Q7L1Q6	Basic leucine zipper and W2 domain-containing protein 1	BZW1	____MNNQKQQKPTLSGQRFKTRKRDEKERF	12
-0.720777	0.675642	-0.664388	0.933233	-0.862784	0.80667	-0.808135	1.23393	-0.760784	0.762996	-0.888402	0.940212	0.999916	Q7L2J0	7SK snRNA methylphosphate capping enzyme	MEPCE	GGTERGPGRCAPSAGSPAAAVGRESPGAAAT	60
0.20036	-0.202134	-1.70043	1.25626	-0.282887	0.275737	-0.302531	0.400841	-0.393932	0.294698	-0.0974045	0.0974045	0.999996	Q7L2J0	7SK snRNA methylphosphate capping enzyme	MEPCE	CAPSAGSPAAAVGRESPGAAATSSSGPQAQQ	69
-0.235801	0.234027	-0.325781	0.369973	-0.505867	0.452938	-0.454403	0.778024	-0.118608	0.120819	-0.395122	0.412751	1	Q7L4I2	Arginine/serine-rich coiled-coil protein 2	RSRC2	SPDRDKKKEQSEVSVSPRASKHHYSRSRSRS	32
0.0361667	0.507086	-0.0465852	-0.24556	0.0191231	0.449784	-0.0247161	-0.0166441	-0.160751	0.284866	-0.304503	0.15941	0.999999	Q7L7X3	Serine/threonine-protein kinase TAO1	TAOK1	YREEGDPRTRASDPQSPPQVSRHKSHYRNRE	421
-0.0245976	-0.16291	0.0141791	0.0883873	0.340209	-0.222103	0.207203	-0.199039	-0.0037837	-0.367061	0.00151424	0.128614	1	Q7L7X3	Serine/threonine-protein kinase TAO1	TAOK1	PMQGVPRGSSMGVRNSPQALRRTASGGRTEQ	965
0.499877	-0.598407	0.543714	-0.52099	0.527547	-0.581346	0.651136	-0.525068	0.390508	-0.498867	0.283184	-0.283184	0.997365	Q7LBC6	Lysine-specific demethylase 3B	KDM3B	KKRESIEGKDGRRRKSASDSGCDPASKKLKG	289
-0.471537	0.531416	-0.380523	0.372438	-0.365884	0.111699	-0.113164	0.229177	-0.432479	0.475178	-0.267787	0.267787	0.980681	Q7RTP6	Protein-methionine sulfoxide oxidase MICAL3	MICAL3	KKEKDLDGAGKRRKTSQSEEEEAPRGHRGER	685
-0.227192	0.197339	-0.186085	0.67757	-0.268937	0.261787	-0.376939	0.716049	-0.271388	0.2736	-0.326515	0.455003	0.99999	Q7Z2E3	Aprataxin	APTX	EAKNPGLETHRKRKRSGNSDSIERDAAQEAE	132
1.10596	-1.1837	1.19428	-1.12707	1.09135	-1.0985	1.3184	-1.33508	0.582727	-0.580515	0.586303	-1.05722	1	Q7Z2K6	Endoplasmic reticulum metallopeptidase 1	ERMP1	PEREARAQEPLVDGCSGGGRTRKRSPGGSGG	44
1.27598	-1.06348	1.07474	-1.08703	0.9127	-0.682772	0.681308	-1.20615	0.65456	-0.368804	0.362723	-0.362723	0.999999	Q7Z2W4	Zinc finger CCCH-type antiviral protein 1	ZC3HAV1	DAPVDDLTRKFTYLGSQDRARPPSGSSKATD	302
-0.473568	0.650227	-0.376976	0.368891	0.190137	-0.311116	0.187098	-0.178933	-0.536006	0.595999	-0.39972	0.39972	0.999995	Q7Z2W4	Zinc finger CCCH-type antiviral protein 1	ZC3HAV1	FLASASASAERSCTPSPDQISHRASLEDAPV	275
1.36508	-1.65721	1.95385	-1.38619	1.23853	-1.24568	1.88814	-1.41881	0.832204	-0.829992	1.14466	-0.895242	0.994318	Q7Z2W4	Zinc finger CCCH-type antiviral protein 1	ZC3HAV1	ARRKTVFSPTLPAARSSLGSLQTPEAVTTRK	386
-0.30719	0.167681	-0.156427	0.644162	-0.294486	0.287336	-0.641793	0.467735	-0.109254	0.111466	-0.278143	0.430625	0.938592	Q7Z309	Protein FAM122B	FAM122B	LSQVFQPYTLRTRRNSTTIMSRHSLEEGLDM	50
0.178031	-0.179805	0.454132	-1.39617	0.365395	-0.372545	0.466731	-0.744377	0.572744	-0.261012	0.264565	-0.317616	0.999982	Q7Z333	Probable helicase senataxin	SETX	PVGEMKNSCNVLHPQSPNNSNRQGCKVPFGE	1663
-0.353568	-0.049811	0.0610651	0.65333	-0.577145	0.0662805	-0.0677451	0.487307	0.0174917	-0.310654	0.239512	-0.018833	0.999772	Q7Z3C6	Autophagy-related protein 9A	ATG9A	QAQAEPERHVWHRRESDESGESAPDEGGEGA	735
0.264803	-0.20303	0.214285	-0.236344	0.749458	-0.756608	1.04526	-1.04165	0.907635	-0.905423	1.00605	-1.29316	0.774961	Q7Z3C6	Autophagy-related protein 9A	ATG9A	GSRHRAEVASALRSFSPLQPGQAPTGRAHST	656
-3.15494	1.72917	-1.71791	1.73672	-2.89573	1.57985	-1.58131	2.05737	-0.848968	1.34416	-0.735852	0.735852	0.999978	Q7Z417	Nuclear fragile X mental retardation-interacting protein 2	NUFIP2	YITNGYMGKGADNDGSGSESGYTTPKKRKAR	212
1.33646	-1.08789	1.09915	-1.14529	0.655711	-0.475714	0.474249	-0.582516	0.932451	-0.890146	0.893699	-1.31892	0.993567	Q7Z417	Nuclear fragile X mental retardation-interacting protein 2	NUFIP2	KVKENLNKTIQNSSVSPTSSSSSSSSTGETQ	376
0.74549	-0.640275	0.651529	-1.00822	0.540625	-0.456393	0.454929	-0.98454	0.742266	-0.676732	0.680285	-1.04456	0.999633	Q7Z460	CLIP-associating protein 1	CLASP1	GKKECDIVSRDGGAASPATEGRGGSEVEGGR	1223
-0.649873	1.42983	-0.1812	0.173115	-1.57186	1.59751	-0.351195	0.359359	0.116735	0.998301	-0.119005	-0.143161	0.999176	Q7Z460	CLIP-associating protein 1	CLASP1	LLHNHLKNSSNTSVGSPSNTIGRTPSRHTSS	1091
-1.88153	0.804878	-0.793624	1.21001	-1.29065	0.947197	-0.948662	1.56858	-1.43334	1.02358	-0.968209	0.968209	0.999663	Q7Z460	CLIP-associating protein 1	CLASP1	PGSYASLGRIRTRRQSSGSATNVASTPDNRG	646
0.751333	-0.753108	0.768394	-1.31712	0.428303	-0.582531	0.628554	-0.425825	0.893029	-0.868081	0.871634	-1.47584	0.99245	Q7Z4H7	HAUS augmin-like complex subunit 6	HAUS6	QDHLVEEVARAVLSDSPQLSEGKEIKLEELI	552
-0.60487	0.203807	-0.192553	0.443424	-0.724094	0.22725	-0.228715	0.450119	-0.654967	0.254497	-0.250944	0.307169	0.975138	Q7Z4S6	Kinesin-like protein KIF21A	KIF21A	GLPSKIGSISRQSSLSEKKIPEPSPVTRRKA	1231
-0.609958	0.521944	-0.47692	0.468835	-0.465178	0.458028	-0.519901	0.526809	-0.504595	0.5652	-0.444549	0.444549	1	Q7Z4V5	Hepatoma-derived growth factor-related protein 2	HDGFRP2	RPGSDRQERERARGDSEALDEES________	664
0.617529	-0.619303	0.790823	-0.837324	-0.218293	0.191462	-0.166979	0.175143	1.03e-05	0.359601	-0.239276	-0.00135163	1	Q7Z4V5	Hepatoma-derived growth factor-related protein 2	HDGFRP2	LHDSVREGPDLDRPGSDRQERERARGDSEAL	652
0.311723	-0.140871	0.152125	-1.27544	0.113955	-0.0386815	0.0372169	-1.07593	0.231243	-0.0738932	0.0774463	-0.567919	0.998507	Q7Z569	BRCA1-associated protein	BRAP	DELKTTVEERKSSEASPTAQRSKDHSKECIN	97
1.81915	-1.53265	1.5439	-2.21184	1.35436	-0.994153	0.992689	-3.80546	1.39474	-1.08947	1.09302	-2.23768	0.812094	Q7Z569	BRCA1-associated protein	BRAP	EIQEGQINIAMASASSPASSGGSGKLPSRKG	571
0.0920995	-0.120842	0.158348	-0.113213	0.55297	-0.56012	0.977294	-1.66312	0.439114	-0.179352	0.182905	-0.370196	0.999794	Q7Z5L2	Coiled-coil domain-containing protein R3HCC1L	R3HCC1L	GAVLLKTGDEEESCGSPNSVVKEKQKESSLS	42
0.0157135	-0.274194	-0.026132	0.600838	-0.454801	0.214253	-0.215718	0.659571	-0.730364	-0.432403	0.57977	0.436885	1	Q7Z5L9	Interferon regulatory factor 2-binding protein 2	IRF2BP2	NGFSKLEEPPELNRQSPNPRRGHAVPPTLVP	175
-1.64283	1.64106	-1.66649	2.00255	-1.72932	1.72217	-1.84537	2.59165	-1.61621	1.61842	-1.8483	2.36683	0.991929	Q7Z5L9	Interferon regulatory factor 2-binding protein 2	IRF2BP2	NQVHSTTRRNSNSPPSPSSMNQRRLGPREVG	460
-0.0689366	0.0671625	-0.0972631	0.264223	-0.0576798	0.144411	-0.165036	0.0601587	0.0245244	-0.0101288	0.0136819	-0.0432445	1	Q7Z6B7	SLIT-ROBO Rho GTPase-activating protein 1	SRGAP1	SHPRGLLQNRGLNNDSPERRRRPGHGSLTNI	906
-0.501256	0.499482	-0.62112	0.643553	-0.461084	0.453934	-0.482753	0.823181	-0.530896	0.452114	-0.448561	0.620354	1	Q7Z6E9	E3 ubiquitin-protein ligase RBBP6	RBBP6	AAGAQPRPSANRENFSPERFLPLNIRNSPFT	861
-0.539392	0.468817	-0.457563	0.905116	-0.604056	0.596906	-0.753322	1.01208	-0.495977	0.387198	-0.310247	0.310247	1	Q7Z6E9	E3 ubiquitin-protein ligase RBBP6	RBBP6	RYHSRSRSPQAFRGQSPNKRNVPQGETEREY	780
-0.774368	0.495688	-0.484434	0.849406	-0.515939	0.508789	-0.748168	0.984092	-0.612414	0.57352	-0.460158	0.460158	0.859346	Q7Z6E9	E3 ubiquitin-protein ligase RBBP6	RBBP6	DLPKKGTGDSKKSNSSPSRDRKPHDHKATYD	1535
1.07778	-1.07956	1.21495	-2.54234	0.728418	-0.735568	0.83775	-1.3406	0.662387	-0.660175	0.835858	-0.924798	0.991773	Q7Z6E9	E3 ubiquitin-protein ligase RBBP6	RBBP6	LTRRKDSPSRNKDSASGQKNKPREERDLPKK	1509
-0.739173	0.568346	-0.557092	0.831685	-0.860997	0.622403	-0.623868	1.02723	-1.00776	0.558945	-0.542157	0.542157	0.99328	Q7Z6E9	E3 ubiquitin-protein ligase RBBP6	RBBP6	SSTLVDYTSTSSTGGSPVRKSEEKTDTKRTV	1277
0.601234	-0.603008	1.09413	-1.17186	0.448868	-0.456018	0.732751	-0.902656	0.530687	-0.528476	0.808289	-0.988447	0.969724	Q7Z6Z7	E3 ubiquitin-protein ligase HUWE1	HUWE1	EYNLEQQRRAQCETLSPDGLPEEQPQTTKLK	3662
-0.346394	0.34462	-0.439098	0.454314	-0.361501	0.351165	-0.35263	0.595078	-0.359945	0.362157	-0.39857	0.434009	0.999423	Q7Z6Z7	E3 ubiquitin-protein ligase HUWE1	HUWE1	CIRIALPAPRGSGTASDDEFENLRIKGPNAV	1907
0.304245	-0.31262	0.667169	-0.325359	0.1951	-0.202249	0.501461	-0.486579	0.432965	-0.430753	0.462443	-1.17041	0.809927	Q7Z6Z7	E3 ubiquitin-protein ligase HUWE1	HUWE1	RSDGSGESAQPPEDSSPPASSESSSTRDSAV	2918
0.29051	-0.643767	0.495906	-0.311623	-1.14004	-0.22476	1.20207	0.217688	-1.18924	-0.130803	0.219605	0.135284	0.997153	Q7Z6Z7	E3 ubiquitin-protein ligase HUWE1	HUWE1	ESQEDVLMDEAPSNLSQASTLQANREDSMNI	2391
0.113566	-0.589463	0.171542	-0.134679	0.72189	-0.933921	0.756966	-0.719411	0.788419	-0.89059	0.953277	-0.78976	1	Q7Z7K6	Centromere protein V	CENPV	SAAAALAPSATRTRRSASQAGSKSQAVEKPP	45
1.02285	-1.22664	1.28627	-1.04396	0.309407	-0.316557	0.453083	-0.794794	0.720215	-1.29771	0.826596	-0.721557	1	Q86TC9	Myopalladin	MYPN	APSMPSQGLAKKNTKSPQPVNDDNIRETKNA	867
-0.0857883	-1.91631	0.458965	0.0646749	0.117212	-0.560515	0.377362	-0.114733	-0.341831	0.158142	0.0768293	-0.0768293	1	Q86U42	Polyadenylate-binding protein 2	PABPN1	AAAAAAAAGAAGGRGSGPGRRRHLVPGAGGE	19
0.0880703	-0.0898444	0.375911	-0.78759	0.145231	-0.152381	0.335192	-0.706256	0.0544956	-0.0522838	0.0875333	-0.469092	1	Q86U42	Polyadenylate-binding protein 2	PABPN1	KLKELQNEVEKQMNMSPPPGNAGPVIMSIEE	150
-0.820514	0.786982	-0.775728	0.999236	-0.795024	0.556762	-0.558227	0.713615	-0.911741	0.704017	-0.578419	0.578419	0.998536	Q86U70	LIM domain-binding protein 1	LDB1	EPTRQQPSKRRKRKMSGGSTMSSGGGNTNNS	302
-0.211473	0.209699	-0.340802	0.199536	-0.177104	0.169954	-0.348283	0.356611	-0.0874524	0.0896642	-0.36866	0.627187	1	Q86U86	Protein polybromo-1	PBRM1	QQERERAAQQQQPSASPRAGTPVGALMGVVP	1453
1.04146	-1.04323	1.15973	-1.138	0.81069	-0.81784	0.94379	-1.66968	0.649774	-0.647562	0.789058	-1.01258	1	Q86U90	YrdC domain-containing protein, mitochondrial	YRDC	ARLLRLPGSGAVQAASPERAGWTEALRAAVA	60
-1.64512	0.449107	-0.437853	1.38006	-0.641753	0.04865	-0.0501146	1.16897	-1.05127	0.578952	-0.575399	1.20256	0.999937	Q86UE4	Protein LYRIC	MTDH	GGGWNEKSVKLSSQISAGEEKWNSVSPASAG	298
1.16804	-1.16982	1.44695	-1.56845	0.944648	-0.951798	1.2503	-1.40125	0.522705	-0.928168	0.766415	-0.524047	1	Q86UE4	Protein LYRIC	MTDH	PAAAPDDLALLKNLRSEEQKKKNRKKLSEKP	111
1.09082	-0.896268	0.907522	-1.92129	0.985471	-0.954375	0.95291	-1.34858	1.01142	-0.898621	0.902174	-1.03678	0.853628	Q86UE8	Serine/threonine-protein kinase tousled-like 2	TLK2	DPYLLPHIRKSVSTSSPAGAAIASTSGASNN	753
1.22504	-1.22681	1.50262	-1.27041	0.946786	-0.953936	1.31386	-1.55067	0.937295	-0.935083	1.55846	-0.946998	0.978511	Q86UK0	ATP-binding cassette sub-family A member 12	ABCA12	AYLNSLNNFLLRVNMSKYDAARHGIIMYSHP	1954
-0.310566	0.308792	-0.430277	0.381242	-0.195218	0.188068	-0.747148	0.62988	-0.666403	0.457042	-0.453489	0.777141	0.999857	Q86UP2	Kinectin	KTN1	KKNKKKEIQNGNLHESDSESVPRDFKLSDAL	75
1.56371	-1.43782	1.44907	-3.28557	1.30722	-1.22229	1.22082	-3.34542	1.41911	-1.29148	1.29503	-2.82015	0.993723	Q86UP2	Kinectin	KTN1	QEALPLHQETKQESGSGKKKASSKKQKTENV	206
0.0507575	0.0353261	-0.024072	-0.390382	0.0188947	0.101713	-0.0108088	-0.708019	-0.0214443	0.0274931	0.0191749	-1.01209	0.999294	Q86UU0	B-cell CLL/lymphoma 9-like protein	BCL9L	KGVGAGNHGAKANQISPSNSSLKNPQAGVPP	88
0.526885	-0.528659	0.55463	-0.588355	0.639333	-0.395056	0.393591	-0.87873	0.490642	-0.235688	0.239241	-0.376323	0.99467	Q86UU0	B-cell CLL/lymphoma 9-like protein	BCL9L	VPSPGWVASPKTAMPSPGVSQNKQPPLNMNS	1017
0.0633662	-0.0651403	0.481095	-0.215351	-0.112375	-0.0844193	0.0829547	0.21447	-0.0123299	-0.328525	0.072128	0.0109886	1	Q86UU1	Pleckstrin homology-like domain family B member 1	PHLDB1	TFSDGLATRTLQPPESPRLGRRGLDSMRELP	443
-0.0696874	0.0679133	0.153949	-0.130164	0.0206663	-0.0278163	0.0697319	-0.227727	-0.00677874	0.0235387	0.00450929	-0.444688	0.997714	Q86UW9	Probable E3 ubiquitin-protein ligase DTX2	DTX2	AIGLPVCLSRAPQPTSPPASRLASKSHGSVK	360
0.0304455	-0.0322196	-0.0987253	0.211203	-0.660046	-0.0220976	0.296502	0.015026	0.0208615	-0.0186497	-0.0248438	0.203701	0.977579	Q86V15	Zinc finger protein castor homolog 1	CASZ1	VVVEKRADAGSHTEGSPSQPRDQERSGPESG	57
0.269689	-1.54291	0.280004	-0.288089	0.605702	-1.0877	0.242064	-0.2339	0.344499	-0.777302	0.225048	-0.225048	1	Q86V48	Leucine zipper protein 1	LUZP1	LEQNKKMNRDYTRNASNLERNDLRIEDGISS	233
1.95495	-1.40804	1.38929	-1.39738	1.06079	-0.950958	0.949494	-2.01392	1.161	-0.974047	0.9776	-1.29258	0.817113	Q86V48	Leucine zipper protein 1	LUZP1	NKVTSSITIYPSDSSSPRAAPGEALRERHTS	805
0.382883	-0.636572	0.0628543	-0.0709395	0.52883	-0.151074	-0.00647841	0.0146427	0.442089	-0.317007	0.0804797	-0.0804797	0.920558	Q86VM9	Zinc finger CCCH domain-containing protein 18	ZC3H18	KKEDGVKEEKRKRDSSTQPPKSAKPPAGGKS	775
-0.345551	0.343777	-0.504715	0.368379	-0.289365	0.282216	-0.441935	0.433964	-0.284068	0.28628	-0.545807	0.444971	1	Q86VM9	Zinc finger CCCH domain-containing protein 18	ZC3H18	ESAARGPSQEEEDNHSDEEDRASEPKSQDQD	67
-0.50172	0.499945	-0.638329	0.680495	-0.597832	0.500004	-0.501469	0.938374	-0.438369	0.503844	-0.529764	0.437028	0.99939	Q86VM9	Zinc finger CCCH domain-containing protein 18	ZC3H18	DEEDRASEPKSQDQDSEVNELSRGPTSSPCE	83
-0.5958	0.501574	-0.49032	0.665654	-0.477071	0.438477	-0.439942	0.711584	-0.325338	0.327549	-0.406106	0.571118	1	Q86VM9	Zinc finger CCCH domain-containing protein 18	ZC3H18	PDRGSRDRKSGGRLGSPKPERQRGQNSKAPA	868
-0.549161	0.547387	-0.63865	0.641065	-0.549893	0.542743	-0.690276	0.749536	-0.480813	0.483024	-0.54677	0.557151	0.999985	Q86VM9	Zinc finger CCCH domain-containing protein 18	ZC3H18	WRRSKSPKKKLGVSVSPSRARRRRKTSASSA	534
-0.572309	0.581664	-0.674593	0.551196	-0.509601	0.502451	-0.629234	0.687776	-0.436173	0.438385	-0.721094	0.479143	0.999945	Q86VM9	Zinc finger CCCH domain-containing protein 18	ZC3H18	NSKAPAAPADRKRQLSPQSKSSSKVTSVPGK	893
-0.759479	0.649738	-0.638484	0.709187	-0.69577	0.68862	-0.802103	0.860269	-0.538454	0.68126	-0.511828	0.511828	0.999369	Q86VM9	Zinc finger CCCH domain-containing protein 18	ZC3H18	DKDRQSPPPAKRPNTSPDRGSRDRKSGGRLG	852
-0.384842	0.383068	-0.385095	0.875735	-0.64493	0.70173	-0.841493	0.647409	-0.535142	0.495167	-0.209754	0.209754	1	Q86VM9	Zinc finger CCCH domain-containing protein 18	ZC3H18	REKEREKEKGKPKPRSPQPPSRQAEPPKKEA	487
-0.538899	0.537125	-0.614131	0.575014	-0.523591	0.318189	-0.319654	0.591677	-0.443524	0.504949	-0.448405	0.442182	0.999707	Q86VM9	Zinc finger CCCH domain-containing protein 18	ZC3H18	KGSRKRYEPSDKDRQSPPPAKRPNTSPDRGS	842
0.0217814	-0.365604	-0.0322	0.208706	0.317882	-0.292305	0.199347	-0.191183	0.728272	-0.588793	0.406694	-0.406694	1	Q86VS8	Protein Hook homolog 3	HOOK3	LMERLNQSDSIEDPNSPAGRRHLQLQTQLEQ	238
0.241223	-0.207263	0.218517	-1.5548	0.308239	-0.0539014	0.0524368	-1.59981	0.270487	-0.268276	0.332761	-1.77538	0.999915	Q86W50	Methyltransferase-like protein 16	METTL16	SSNGAQDQEASEQFGSPVAERGKRLPGVAGQ	498
1.45382	-1.4556	2.00174	-2.17356	1.28682	-1.29397	1.73876	-3.1353	1.2705	-1.26829	1.53454	-1.67231	0.875836	Q86W92	Liprin-beta-1	PPFIBP1	GEEYVCPMELGQASGSASKKGFKPGLDMRLY	936
-0.00504538	0.00327128	-0.267214	0.483664	-0.160474	0.153324	-0.476205	0.362372	-0.132657	0.252978	-0.420548	0.131316	0.997981	Q86W92	Liprin-beta-1	PPFIBP1	QLCDKLLTSSLQKSSSLGNLKKETSDGEKET	466
0.0564255	0.714599	-1.02128	-0.0775389	-0.00576889	0.620471	-1.54915	0.00824786	0.17888	0.419536	-1.27456	-0.180221	0.999999	Q86WB0	Nuclear-interacting partner of ALK	ZC3HC1	VDAKDTSATSQSVNGSPQAEQPSLESTSKEA	62
-0.419758	0.792123	-0.57338	0.398645	-0.458412	0.451262	-0.526676	0.64482	-0.0872031	0.0958197	-0.81059	0.0858618	0.969836	Q86WB0	Nuclear-interacting partner of ALK	ZC3HC1	SPLRKAKRARLCSSSSSDTSSRSFFDPTSQH	410
-0.00319674	0.00142264	-0.316686	0.523166	-0.338571	0.331421	-0.920217	0.481841	-0.124388	0.126599	-0.757924	1.05961	1	Q86WB0	Nuclear-interacting partner of ALK	ZC3HC1	PGLEGRPERLPLVPESPRRMMTRSQDATFSP	321
-0.827388	0.825614	-0.889695	1.25422	-1.32677	1.22215	-1.22361	2.16359	-1.15427	1.09475	-1.09119	1.65605	0.995493	Q86WB0	Nuclear-interacting partner of ALK	ZC3HC1	ESPRRMMTRSQDATFSPGSEQAEKSPGPIVS	335
-0.752858	0.472786	-0.461532	1.36901	-0.504748	0.541661	-0.592054	0.507227	-0.663308	0.66552	-0.781409	0.73147	0.92107	Q86WC4	Osteopetrosis-associated transmembrane protein 1	OSTM1	KKRKLILPKRLKSSTSFANIQENSN______	325
-0.656295	0.654521	-0.664617	0.822504	-0.378282	0.371132	-0.462412	0.885296	-0.301257	0.303468	-0.311513	0.369508	1	Q86WR0	Coiled-coil domain-containing protein 25	CCDC25	LMKVENMSSNQDGNDSDEFM___________	204
0.207835	-0.123452	0.047953	-0.0560382	0.0627531	0.173042	-0.0546671	-0.321049	0.120487	-0.118276	0.201407	-0.430669	1	Q86X27	Ras-specific guanine nucleotide-releasing factor RalGPS2	RALGPS2	SAASREDLVGPEVGASPQSGRKSVAAEGALL	308
0.515322	-0.517096	0.732319	-0.567862	0.217734	-0.520119	0.494357	-0.215255	0.479835	-0.477623	0.617135	-0.571787	0.999972	Q86XL3	Ankyrin repeat and LEM domain-containing protein 2	ANKLE2	SLEEIKNRQNAARNNSPPTVGAFGHTRCSAF	662
-0.536662	0.656308	-0.257713	0.249627	-0.442213	0.435063	-0.478344	0.515293	-0.426908	0.164069	-0.160516	0.168435	0.999972	Q86Y91	Kinesin-like protein KIF18B	KIF18B	VYEGGGQPPPQDLPGSPKSGPPPEHQPCTPE	404
-0.414654	0.577603	-0.955964	0.39354	-0.548022	0.817833	-0.696077	0.550501	-0.412859	0.654017	-0.719571	0.411518	0.959326	Q86YP4	Transcriptional repressor p66-alpha	GATAD2A	NSTPTSVASVVTSAESPASRQAAAKLALRKQ	340
-0.5338	0.532026	-0.629371	0.887631	-0.446627	0.439477	-0.678918	1.03661	-0.423322	0.425534	-0.652161	0.725525	0.891208	Q86YS7	C2 domain-containing protein 5	C2CD5	DTDLSLTPKTGMGSGSAGKEGGPFKALLRQQ	323
0.578309	-0.966281	0.20569	-0.213775	1.36208	-1.30923	1.30777	-2.33951	0.972628	-0.890171	0.893724	-1.0748	0.909303	Q86Z02	Homeodomain-interacting protein kinase 1	HIPK1	PLNLSQNQQSSAAPTSQERSSNPAPRRQQAF	1058
0.625007	-0.475811	0.487065	-0.782822	0.494011	-0.392591	0.391127	-0.753452	0.655184	-0.395155	0.398708	-0.811101	1	Q8IU60	m7GpppN-mRNA hydrolase	DCP2	KNQSMRGNGRKQYQDSPNQKKRTNGLQPAKQ	329
-0.290297	0.0443299	-0.0330758	0.341249	-0.220241	0.0194051	-0.0208697	0.52473	-0.216334	0.0633357	-0.0597827	0.564584	0.999997	Q8IU81	Interferon regulatory factor 2-binding protein 1	IRF2BP1	KDPGGGGGPVRAGGASPAASSTAQPPTQHRL	453
-0.425692	0.344522	-0.333268	0.707029	-0.062337	0.0310204	-0.032485	0.278046	0.191983	-0.189771	0.386063	-0.564609	1	Q8IU81	Interferon regulatory factor 2-binding protein 1	IRF2BP1	APSRNLAPTPRRRKASPEPEGEAAGKMTTEE	384
-0.0540247	0.170452	-0.0672768	0.0329113	-0.219323	0.317346	-0.0176446	0.0258089	-0.0246499	0.165758	-0.277682	0.0233086	0.975603	Q8IUD2	ELKS/Rab6-interacting/CAST family member 1	ERC1	PRLPRSPRLGHRRTNSTGGSSGSSVGGGSGK	37
-1.53714	1.88184	-1.39254	1.38445	-1.95143	1.67583	-1.39303	1.4012	-1.01722	1.20135	-1.11517	1.01587	0.999999	Q8IUD2	ELKS/Rab6-interacting/CAST family member 1	ERC1	YGSARSVGKVEPSSQSPGRSPRLPRSPRLGH	17
-2.09114	0.728903	-0.717649	0.950537	-0.739789	0.614083	-0.615548	0.947758	-1.41506	0.819578	-0.628747	0.628747	1	Q8IUD2	ELKS/Rab6-interacting/CAST family member 1	ERC1	RSVGKVEPSSQSPGRSPRLPRSPRLGHRRTN	21
0.574139	-0.575913	1.23236	-1.22272	0.736293	-0.743443	1.22727	-0.954967	0.280972	-0.527648	0.306497	-0.282314	0.999788	Q8IV31	Transmembrane protein 139	TMEM139	LEWGLRSQLQSMQTESPGPSGNARDNEAFEV	74
0.0993588	0.496637	-0.65491	-0.120472	-0.00908529	0.572966	-0.449432	0.0115643	0.194272	0.630522	-0.652225	-0.195613	0.998768	Q8IY33	Inactive serine/threonine-protein kinase VRK3;MICAL-like protein 2	VRK3;MICALL2	KSPQVTRGSPQKTSCSPQKTRQSPQTLKRSR;PRQPGAMGVDSRTSCSPQKAQEANKARPSAW	272
-0.218466	0.166713	-0.155459	0.508439	-0.223578	0.216428	-0.22917	0.779082	-0.298946	0.120752	-0.117199	0.365954	1	Q8IVT2	Mitotic interactor and substrate of PLK1	MISP	HKNAMAERWESRIYASEEDD___________	675
-0.47833	-0.372085	1.13491	0.372644	-0.040719	-0.013433	1.93704	0.0063614	-0.315094	-0.14565	1.22161	0.150131	0.999767	Q8IVT2	Mitotic interactor and substrate of PLK1	MISP	WGWEVAGAPALRLQKSQSSDLLERERESVLR	541
0.668121	-0.669895	1.04918	-0.951011	0.439093	-0.446243	0.731547	-1.49154	0.10108	-1.0878	0.355369	-0.102421	0.999984	Q8IVT2	Mitotic interactor and substrate of PLK1	MISP	EVAEERRNALFPEVFSPTPDENSDQNSRSSS	575
-1.11761	-0.501201	0.512455	0.947462	-1.16034	-1.01547	1.014	1.0616	-2.01131	-0.917257	0.92081	1.21515	1	Q8IW35	Centrosomal protein of 97 kDa	CEP97	ILSKQRFHQRQLMNQSQNEELSPLVPVETRA	308
0.612109	0.072644	-0.0613899	-0.401573	0.929412	0.116738	-0.118203	-1.31233	0.769368	-0.0935252	0.0970782	-0.51732	0.976598	Q8IW50	Protein FAM219A	FAM219A	RELARKGSLKNGSMGSPVNQQPKKNNVMART	72
1.13264	-1.06103	1.07228	-1.42496	1.32122	-1.06371	1.06224	-2.44759	1.37545	-1.2371	1.24065	-1.65946	0.996764	Q8IWC1	MAP7 domain-containing protein 3	MAP7D3	QKNCPPSPLPLISKQSPQTSFPYKIMPIQHT	533
0.645919	-0.517044	0.528298	-0.679239	0.608061	-0.359176	0.357711	-1.15681	0.437223	-0.322298	0.325851	-0.427297	0.959388	Q8IWD4	Coiled-coil domain-containing protein 117	CCDC117	GAELAPRPGPRAVPSSPAGSAARGRVSVHCK	53
0.606376	0.643347	-0.687118	-0.62749	0.652932	0.674518	-0.804744	-0.650453	0.691618	0.623094	-0.790885	-0.618612	0.988474	Q8IWI9	MAX gene-associated protein	MGA	PTLAPVVAKLGNSGASPSSAGK_________	3059
0.602268	0.369851	-0.358597	-0.79983	0.354823	0.344554	-0.346019	-0.45573	0.10615	-0.103938	-0.184925	0.175842	1	Q8IWI9	MAX gene-associated protein	MGA	KIATAAKVVNANQNASPNVPGKRGRPRKLKL	607
1.07256	-0.765121	0.776375	-1.33855	0.599908	-0.133399	0.131934	-0.150687	0.831485	-0.561396	0.564949	-1.43409	0.99434	Q8IWW6	Rho GTPase-activating protein 12	ARHGAP12	LDLTHNNGKFNNDSHSPKVSSQNRTRSFGHF	165
-0.523781	0.595409	-0.716037	0.502668	-0.647262	0.666824	-0.963457	0.649741	-0.47021	0.733506	-0.972503	0.468869	0.931212	Q8IWZ3	Ankyrin repeat and KH domain-containing protein 1	ANKHD1	INGEPRGGGAGGNSDSDNLDSTDCNSESSSG	1593
-1.07194	0.454525	-0.443271	0.76527	-0.0159894	-0.122453	0.273393	0.0184683	-0.0625102	-0.0664132	0.16768	0.0611689	0.911037	Q8IX03	Protein KIBRA	WWC1	PGPQSQYVCRLNRSDSDSSTLSKKPPFVRNS	947
-0.102297	0.100523	-0.192892	0.549761	-0.0783302	0.0496732	-0.0511378	0.407494	-0.132625	0.0413834	-0.0378303	0.0729585	1	Q8IX12	Cell division cycle and apoptosis regulator protein 1	CCAR1	ERDDETDEPKPKRRKSGDDKDKKEDRDERKK	832
0.13104	-0.132814	-0.220175	0.183639	0.189239	-0.338133	-0.160026	0.16819	-0.0226095	0.0228883	-0.0193352	0.444875	0.937196	Q8IXQ3	Uncharacterized protein C9orf40	C9orf40	RKRKIDAGTMAEPSASPSKRRDSGDNSAPSG	69
-0.1592	0.157426	0.613646	-0.424268	-0.0507984	-0.984433	1.16661	0.0532773	-0.193018	0.0462058	-0.0426527	1.03525	1	Q8IXQ3	Uncharacterized protein C9orf40	C9orf40	GTMAEPSASPSKRRDSGDNSAPSGQEREDHG	76
-0.484922	-1.30141	4.6973	0.463809	0.164791	-0.485828	3.17822	-0.162312	-0.734635	-0.0352304	0.946768	0.0397116	1	Q8IY81	pre-rRNA processing protein FTSJ3	FTSJ3	VIASSKKAKRDLIDNSFNRYTFNEDEGELPE	688
0.363078	-0.123589	0.134844	-1.75592	0.240568	0.191892	-0.193356	-1.56256	1.41684	-0.92743	0.930983	-1.55699	0.997637	Q8IYB1	Protein MB21D2	MB21D2	LTLELQRRGSTTSIPSPQSDGGDPNQPDDRL	439
-0.951331	0.384479	-0.373225	0.438277	-0.30374	0.29659	-0.363836	0.49203	-0.538428	0.087361	-0.0838079	0.100819	0.781075	Q8IYB3	Serine/arginine repetitive matrix protein 1	SRRM1	KRHSPSPRPRAPQTSSSPPPVRRGASSSPQR	695
-0.604026	0.27096	-0.259706	0.9263	-0.446733	0.439583	-0.445917	0.702341	-0.233634	0.191548	-0.187995	0.607039	0.982847	Q8IYB3	Serine/arginine repetitive matrix protein 1	SRRM1	RHSPSPRPRAPQTSSSPPPVRRGASSSPQRR	696
-0.610584	0.570533	-0.559279	0.6345	-0.588901	0.581752	-0.64155	0.743229	-0.662268	0.549403	-0.371589	0.371589	1	Q8IYB3	Serine/arginine repetitive matrix protein 1	SRRM1	HLREKALRSMRKAQVSPQS____________	901
-0.729172	0.540588	-0.529334	0.879082	-0.315121	0.307971	-0.475007	0.693585	-0.61508	0.430828	-0.427275	0.554078	1	Q8IYB3	Serine/arginine repetitive matrix protein 1	SRRM1	HRKGSSPSRSTREARSPQPNKRHSPSPRPRA	675
-0.575987	0.563169	-0.551915	1.02853	-0.694996	0.687846	-0.736382	1.00778	-0.668454	0.570206	-0.270471	0.270471	0.953711	Q8IYB3	Serine/arginine repetitive matrix protein 1	SRRM1	KRRSPSLSSKHRKGSSPSRSTREARSPQPNK	665
-0.342188	0.340414	-0.411765	0.615253	-0.592914	0.585764	-0.764967	1.18821	-0.350098	0.35231	-0.455701	0.51619	1	Q8IYB3	Serine/arginine repetitive matrix protein 1	SRRM1	TPQQSNRTRKSRVSVSPGRTSGKVTKHKGTE	431
1.93128	-1.60998	1.62123	-3.51987	1.1538	-0.883095	0.88163	-1.97991	1.05883	-1.11626	1.39657	-1.06017	1	Q8IYB3	Serine/arginine repetitive matrix protein 1	SRRM1	SESEEDKGGKMAAADSVQQRRQYRRQNQQSS	478
-0.618112	0.573694	-0.562439	0.938819	-0.676767	0.256151	-0.257616	0.593768	-0.57935	0.67292	-0.328555	0.328555	0.863636	Q8IYB3	Serine/arginine repetitive matrix protein 1	SRRM1	PPKRRVSHSPPPKQRSSPVTKRRSPSLSSKH	645
-0.224848	-0.0218888	0.0331429	0.282196	-0.35699	0.152447	-0.153911	0.711667	-0.1374	-0.263761	0.211379	0.136058	0.999522	Q8IYB3	Serine/arginine repetitive matrix protein 1	SRRM1	PQSVRRVSSSRSVSGSPEPAAKKPPAPPSPV	756
-1.59464	1.09724	-1.08598	1.25188	-0.360879	0.353729	-0.364438	0.791898	-0.651674	0.653886	-0.784778	0.875886	0.999602	Q8IYB3	Serine/arginine repetitive matrix protein 1	SRRM1	HRPSPPATPPPKTRHSPTPQQSNRTRKSRVS	414
-0.289023	0.35622	-0.508794	0.26791	-0.214847	0.207697	-0.458417	0.356079	-0.201537	0.203748	-0.236928	0.945124	0.999996	Q8IYB7	DIS3-like exonuclease 2	DIS3L2	PGTQGHLGPEKEEEESDGEPEDSSTS_____	875
-0.0472272	0.0454531	-0.0978256	0.0603033	0.0448195	-0.0519695	0.111294	-0.19315	0.242937	-0.190712	0.0253814	-0.0253814	0.999494	Q8IZL8	Proline-, glutamic acid- and leucine-rich protein 1	PELP1	ISPPADALKLRSPRGSPDGSLQTGKPSAPKK	481
-0.113264	0.294231	-0.155816	0.0921504	0.00718636	0.220592	-0.122529	-0.00470739	0.132751	0.443128	-0.13502	-0.140048	1	Q8IZP0	Abl interactor 1	ABI1	PNDYMTSPARLGSQHSPGRTASLNQRPRTHS	225
0.210134	-0.344357	0.80814	-0.231247	0.928174	-0.955762	1.59804	-0.925695	0.10611	-0.594888	0.887501	-0.107451	1	Q8IZT6	Abnormal spindle-like microcephaly-associated protein	ASPM	KKKKISASTSHNRRVSNIQNVNKTFSVSQKV	170
1.10889	-1.18109	2.55143	-1.13001	1.00048	-1.00763	2.56715	-1.40547	0.662149	-0.774268	2.00371	-0.663491	0.999821	Q8IZW8	Tensin-4	TNS4	QRELGGADGASDSTDSPASCQKKSAGCHTLY	571
-1.00578	0.834892	-0.730484	0.722398	-0.779368	0.478603	-0.480068	0.796799	-0.467846	0.470058	-0.662465	0.75949	0.999406	Q8N108	Mesoderm induction early response protein 1	MIER1	RLLDESESAASSRAPSPPPTASNSSNSQSEK	377
-0.670299	1.11656	-1.21494	0.649186	-0.556654	0.618142	-0.823125	0.559133	-0.294459	0.569258	-0.720856	0.293118	0.998276	Q8N122	Regulatory-associated protein of mTOR	RPTOR	QRVLDTSSLTQSAPASPTNKGVHIHQAGGSP	863
-0.412508	1.72549	-0.604042	0.391395	-0.997069	0.989919	-1.0037	1.48926	-0.656497	0.658709	-0.880202	0.727994	0.988367	Q8N163	Cell cycle and apoptosis regulator protein 2	CCAR2	FAGAKLEDSEVRSVASNQSEMEFSSLQDMPK	678
0.123061	-0.417596	0.195848	-0.144175	0.229892	-0.237042	0.310958	-0.30435	0.208619	-0.206407	0.37398	-0.43774	0.982932	Q8N1F7	Nuclear pore complex protein Nup93	NUP93	TMNILFTQFKRLKGTSPSSSSRPQRVIEDRD	767
-0.572141	0.417951	-0.406697	0.614257	-0.369024	0.336383	-0.337848	0.624146	-0.422435	0.376005	-0.372452	0.587206	0.999991	Q8N1F8	Serine/threonine-protein kinase 11-interacting protein	STK11IP	CHPPGHGDHLDRAKNSPPQAPSTRDHGSWSL	761
-0.434816	0.352442	-0.341188	0.555199	-0.409779	0.287385	-0.28885	0.385438	-0.355792	0.390061	-0.244434	0.244434	1	Q8N1F8	Serine/threonine-protein kinase 11-interacting protein	STK11IP	PRPSPPQEEARGPQESPQKMSEEVRAEPQEE	482
-0.483692	0.450319	-0.439065	0.528895	-0.3432	0.33605	-0.45558	0.499937	-0.407927	0.410139	-0.447143	0.449376	1	Q8N1G0	Zinc finger protein 687	ZNF687	EKHVQVRHGLQLGAQSPGRGTTLARGSSARA	1057
0.047694	0.0330708	-0.0218168	-0.368075	0.00499015	0.152631	0.00309582	-0.327058	0.141706	-0.0170173	0.0205704	-0.503657	0.87096	Q8N201	Integrator complex subunit 1	INTS1	SLPPRRDSTEAPKPKSSPEQPIGQGRIRVGT	1326
0.228844	-0.230618	0.334907	-1.52851	0.333067	-0.252468	0.251003	-1.68699	0.226481	-0.224269	0.247769	-1.33937	0.999061	Q8N4C8	Misshapen-like kinase 1	MINK1	VVQPSHSPTENSKGQSPPSKDGSGDYQSRGL	927
1.54349	-1.34343	1.35468	-2.69016	1.32106	-1.13588	1.13442	-3.71017	1.30893	-1.10375	1.1073	-1.77622	1	Q8N4C8	Misshapen-like kinase 1	MINK1	AREVEERTRMNKQQNSPLAKSKPGSTGPEPP	535
-0.0153593	0.273644	0.00494083	-0.902151	0.00596261	0.181899	0.00212337	-0.282754	0.153019	0.125448	-0.121894	-0.288522	0.998408	Q8N556	Actin filament-associated protein 1	AFAP1	NSAAVLKKSQAAPGSSPCRGHVLRKAKEWEL	711
-0.602341	0.201471	-0.190217	0.652937	-0.674834	0.275723	-0.277187	0.422037	-0.528898	0.224111	-0.220558	0.491683	0.990452	Q8N556	Actin filament-associated protein 1	AFAP1	QPKKADPAAVVKRTGSNAAQYKYGKNRVEAD	548
-0.913693	0.900311	-0.889057	1.06561	-0.848965	0.841815	-1.55579	1.23213	-1.64786	1.61435	-1.6108	1.83673	0.999999	Q8N556	Actin filament-associated protein 1	AFAP1	LGLAIEPKSGTSSPQSPVFRHRTLENSPISS	668
-1.00399	1.12781	-1.65234	0.982876	-1.18784	1.2627	-1.97903	1.19032	-0.723521	1.29369	-1.00294	0.72218	0.997792	Q8N5F7	NF-kappa-B-activating protein	NKAP	_______MAPVSGSRSPDREASGSGGRRRSS	9
-0.776938	0.97618	-0.802013	0.755825	-0.331131	0.371158	-0.638013	0.33361	-0.764543	0.70036	-0.696807	0.847625	0.998599	Q8N5I9	Uncharacterized protein C12orf45	C12orf45	_MEVHGKPKASPSCSSPTRDSSGVPVSKELL	15
0.25125	-0.727693	0.408594	-0.272363	1.11728	-1.12443	1.35682	-1.24007	0.167067	-1.17546	0.341355	-0.168408	1	Q8N5I9	Uncharacterized protein C12orf45	C12orf45	GSDGRGGIWDRLLINSQPKSRKTSTLQTVRI	48
-0.182865	0.0881546	-0.0769005	0.537237	-0.397649	0.109818	-0.111282	0.773305	-0.0446179	0.0468296	-0.131057	0.365031	0.998927	Q8N5P1	Zinc finger CCCH domain-containing protein 8	ZC3H8	GPGNKGSNALLRNSGSQEEDGKPKEKQQHLS	165
-0.112167	0.0776752	-0.0664211	0.0888369	-0.000973112	-0.00617682	0.180884	-0.476048	0.0195967	-0.00750354	0.0110566	-0.0749425	1	Q8N684	Cleavage and polyadenylation specificity factor subunit 7	CPSF7	RSSSTEPPPPVRQEPSPKPNNKTPAILYTYS	60
-0.356854	0.245211	-0.233957	0.525398	-0.469688	0.462538	-0.554583	0.676255	-0.379423	0.444058	-0.483378	0.378082	0.990502	Q8N684	Cleavage and polyadenylation specificity factor subunit 7	CPSF7	DVLTATSQPSDDRSSSTEPPPPVRQEPSPKP	48
1.34775	-1.34953	1.5576	-2.27458	1.18282	-1.18997	1.3356	-2.20002	1.1044	-1.10219	1.45205	-1.65908	0.994408	Q8N684	Cleavage and polyadenylation specificity factor subunit 7	CPSF7	DCLHGIEAKSYSVGASGSSSRKRHRSRERSP	413
1.15069	-1.44216	1.39506	-1.17181	0.912372	-0.919522	1.13019	-1.39215	0.670476	-0.978451	1.13182	-0.671817	0.963347	Q8N684	Cleavage and polyadenylation specificity factor subunit 7	CPSF7	HGIEAKSYSVGASGSSSRKRHRSRERSPSRS	416
1.08063	-0.957929	0.969183	-1.54631	0.866419	-0.733891	0.732427	-1.17445	1.17428	-1.00214	1.0057	-1.46918	0.999996	Q8N6Q8	Methyltransferase-like protein 25	METTL25	NKVKNKADTEEVFNNSPTNQEKMPTSAILPD	265
-0.197428	0.196571	-0.0902827	0.0821975	-0.211268	0.0775083	-0.0789729	0.244475	-0.10956	0.152446	-0.171247	0.108219	0.993037	Q8N6T7	NAD-dependent protein deacetylase sirtuin-6	SIRT6	PLPRPPTPKLEPKEESPTRINGSIPAGPKQE	303
-0.471668	0.469894	-0.488354	0.567552	-0.699385	0.699488	-0.696728	0.701864	-0.504744	0.467088	-0.134145	0.134145	1	Q8N8A6	ATP-dependent RNA helicase DDX51	DDX51	RRPRRRRRVNDAEPGSPEAPQGKRRKADGED	83
1.25778	-1.13533	1.14658	-1.51432	1.09796	-1.03012	1.02866	-2.51908	1.13168	-0.948278	0.951831	-1.43061	0.890282	Q8N8S7	Protein enabled homolog	ENAH	KGEDSEPVTSKASSTSTPEPTRKPWERTNTM	488
-1.07053	0.113351	-0.102097	1.34291	-0.906581	0.0193633	-0.0208279	0.0603655	-1.7064	0.527939	-0.515439	0.515439	1	Q8N8S7	Protein enabled homolog	ENAH	VLNSQETGPTLPRQNSQLPAQVQNGPSQEEL	125
-0.724609	0.722835	-0.874274	0.749696	-0.428683	0.421533	-0.609507	0.676965	-0.540037	0.797566	-0.578289	0.538696	1	Q8N9T8	Protein KRI1 homolog	KRI1	EQKQLKESFRAFVEDSEDEDGAGEGGSSLLQ	171
-0.0822409	0.0804667	-0.406648	0.606564	-0.716581	0.276712	-0.278177	0.711625	-0.717113	0.316748	-0.268374	0.268374	1	Q8N9T8	Protein KRI1 homolog	KRI1	KVILEKAGKYVDEENSDGETSNHRLQETSSQ	136
-0.258289	0.740111	-0.324284	0.237175	-0.977246	0.0750919	0.187772	-0.0821635	-0.135186	0.137398	-0.177759	0.385317	0.947152	Q8NB49	Phospholipid-transporting ATPase IG	ATP11C	LSARPSVRPLLLRTFSDESNVL_________	1126
0.118848	-0.474268	0.670082	-0.139961	0.193019	-0.323644	0.627665	-0.19054	0.164302	-0.16209	0.771035	-0.496975	0.999307	Q8NC51	Plasminogen activator inhibitor 1 RNA-binding protein	SERBP1	GDGFDSRGKREFDRHSGSDRSSFSHYSGLKH	197
0.747674	-1.28141	0.963058	-0.768787	1.01568	-1.02283	1.0898	-1.35293	0.656874	-0.654663	0.917383	-0.727848	0.999961	Q8NC51	Plasminogen activator inhibitor 1 RNA-binding protein	SERBP1	GPGAKSAAQAAAQTNSNAAGKQLRKESQKDR	63
-0.281743	0.224201	-0.212947	0.279966	-0.380641	0.308435	-0.309899	0.538771	-0.220331	0.30661	-0.128172	0.128172	1	Q8NCD3	Holliday junction recognition protein	HJURP	LPDSWAMNMYRGGPASPGGLQGLETRRLSLP	473
-0.396039	0.269976	-0.258722	0.61846	-0.447994	0.409652	-0.411116	0.744659	-0.406363	0.328385	-0.324832	0.488233	0.999819	Q8ND56	Protein LSM14 homolog A	LSM14A	TASAHLPAPAAVGRRSPVSTRPLPSASQKAG	216
-0.433582	0.511869	-0.544306	0.412468	-0.276849	0.269699	-0.439436	0.600829	-0.390031	0.392243	-0.756569	0.630932	0.940847	Q8ND56	Protein LSM14 homolog A	LSM14A	TQDTRSLKTQLSQGRSSPQLDPLRKSPTMEQ	182
-1.35021	0.65143	-0.640176	1.45279	-1.17046	0.441124	-0.442588	1.15141	-1.39301	0.668173	-0.66462	0.861759	1	Q8ND56	Protein LSM14 homolog A	LSM14A	GSAFTQDTRSLKTQLSQGRSSPQLDPLRKSP	178
-0.580403	0.694299	-1.01526	0.55929	-0.398949	0.391799	-1.0944	0.696113	-0.406357	0.408569	-1.07536	0.445039	0.954199	Q8ND76	Cyclin-Y	CCNY	DKYKDLRRSARKRSASADNLTLPRWSPAIIS	326
1.8052	-1.5718	1.58306	-3.31564	1.1688	-1.17595	2.30075	-1.50827	1.17452	-1.17231	1.62009	-2.34822	0.903521	Q8NDF8	Non-canonical poly(A) RNA polymerase PAPD5	PAPD5	AVGKMQSTQTTNTSNSTNKSQHGSARLFRSS	509
1.92994	-1.38084	1.3921	-4.1892	1.44649	-1.0492	1.04774	-2.8853	1.22469	-0.687873	0.674458	-0.674458	0.99993	Q8NDI1	EH domain-binding protein 1	EHBP1	LKLKKLLEVQPQVANSPSSAAQKAVTESSEQ	964
-0.585806	0.303801	-0.292547	0.482046	-0.293769	0.286619	-0.339074	0.429483	-0.334223	0.26129	-0.257737	0.410005	1	Q8NDI1	EH domain-binding protein 1	EHBP1	FSQYIENRPEMKRQRSIQEDTKKGNEEKAAI	1035
1.09926	-1.10103	1.23139	-1.58193	1.42388	-1.43103	1.537	-3.60766	0.837262	-0.83505	0.970597	-2.55956	0.997741	Q8NDT2	Putative RNA-binding protein 15B	RBM15B	NHSSEGTKESSSNSLSNSRHGAEERGHHHHH	654
-0.470316	0.386439	-0.375185	0.479733	-0.698839	0.593925	-0.595389	0.783851	-0.367296	0.369507	-0.588384	0.478746	0.999704	Q8NDX5	Polyhomeotic-like protein 3	PHC3	NKTTVTSSKISQRDPSPESNKKGESPSLESR	263
0.57226	-0.708557	0.599959	-0.593373	0.901947	-0.905793	0.904328	-3.36091	1.15566	-1.00954	1.01309	-2.46531	1	Q8NE01	Metal transporter CNNM3	CNNM3	YLNALLATRAQNLPQSPENTDLQVIPGSQTR	661
-0.724784	-0.00332172	0.0145758	0.0514858	-0.874177	-0.193013	0.40238	0.185942	-0.36628	0.314676	-0.311123	0.405568	1	Q8NE71	ATP-binding cassette sub-family F member 1	ABCF1	PPKQGKEKAKKAEQGSEEEGEGEEEEEEGGE	228
-0.129935	0.618916	-0.270233	0.108821	-0.44456	0.479974	-0.50281	0.447039	-0.421772	0.366289	-0.362736	0.519399	0.991245	Q8NE71	ATP-binding cassette sub-family F member 1	ABCF1	EKELMERLKKLSVPTSDEEDEVPAPKPRGGK	109
0.345178	-0.193743	0.204997	-1.21818	0.183875	-0.0989817	0.097517	-0.725652	0.298841	-0.417186	0.168051	-0.168051	0.828958	Q8NE71	ATP-binding cassette sub-family F member 1	ABCF1	QQPPEPEWIGDGESTSPSDKVVKKGKKDKKI	22
-0.472078	0.630361	-0.464371	0.450964	-0.643336	0.417677	-0.419141	0.515782	-0.186254	0.344337	-0.881488	0.184913	0.993485	Q8NEM2	SHC SH2 domain-binding protein 1	SHCBP1	YRKFLNLRSSLSNCNSDSEQENISMVEGLKL	273
-0.0850469	0.0832728	-0.101302	0.482303	-0.204473	0.0849191	-0.0863838	0.476464	-0.0602945	0.0625063	-0.061888	0.348642	0.99997	Q8NEY8	Periphilin-1	PPHLN1	RERSPYKRDNTFFRESPVGRKDSPHSRSGSS	133
-0.812896	0.687752	-0.676498	1.09394	-0.723855	0.562896	-0.564361	1.18813	-0.499742	0.358719	-0.355166	0.96741	0.984611	Q8NEY8	Periphilin-1	PPHLN1	DKERPVQSLKTSRDTSPSSGSAVSSSKVLDK	205
-0.202531	0.478215	-0.1793	0.171215	-0.144771	0.475922	-0.266167	0.14725	-0.283413	0.285624	-0.283388	0.736132	0.999672	Q8NFC6	Biorientation of chromosomes in cell division protein 1-like 1	BOD1L1	KDDSKTDTGIVTVEQSPSSSKLKVMQTDESN	2905
0.0567646	-0.130103	0.241646	-0.0778781	-0.184235	0.0605968	-0.0620614	0.117586	-0.0959788	0.0632228	0.1278	-0.0587416	1	Q8NHG8	E3 ubiquitin-protein ligase ZNRF2	ZNRF2	SPEDGGGGRDRPVGGSPGGPRLVIGSLPAHL	135
1.0881	0.297846	-0.286592	-1.53868	0.730483	-0.0332003	0.0317357	-0.461661	1.05478	0.190291	-0.186737	-1.46006	0.99799	Q8NHV4	Protein NEDD1	NEDD1	AKLVTSGAESGNLNTSPSSNQTRNSEKFEKP	516
0.175374	-0.328222	0.156884	-0.164969	0.336973	-0.168173	0.0922738	-0.0841095	0.200546	-0.0568633	0.0604163	-0.137775	1	Q8NI27	THO complex subunit 2	THOC2	EKKDEKDRKERKRDHSNNDREVPPDLTKRRK	1486
0.0431711	0.252603	-0.355762	-0.0642845	-0.199348	0.192198	-0.661878	0.335618	0.0242457	0.106966	-0.0667804	-0.0255871	0.998889	Q8TAD8	Smad nuclear-interacting protein 1	SNIP1	REHRQRNDVGGGGSESQELVPRPGGNNKEKE	202
-1.42288	1.42893	-1.71287	1.40177	-1.2984	1.26598	-1.26744	1.61579	-0.302275	0.344582	-0.671273	0.300934	0.996927	Q8TAD8	Smad nuclear-interacting protein 1	SNIP1	EVAPPAHRRPDHSGGSPSPPTSEPARSGHRG	52
-0.35654	0.71343	-0.555462	0.335427	-0.372245	0.365095	-0.723709	0.477985	-0.277157	0.465255	-0.538961	0.275816	0.947174	Q8TAD8	Smad nuclear-interacting protein 1	SNIP1	SDRDRHRGHSHQRRTSNERPGSGQGQGRDRD	153
0.113954	-0.115728	0.143216	-1.38061	0.098762	-0.0773003	0.0758356	-1.40547	0.188643	-0.165199	0.168752	-1.05534	0.999999	Q8TAQ2	SWI/SNF complex subunit SMARCC2	SMARCC2	RRKKISAKTLTDEVNSPDSDRRDKKGGNYKK	283
-0.486449	0.458385	-0.447131	0.46682	-0.608781	0.315235	-0.3167	0.476882	-0.336258	0.33847	-0.482502	0.448587	0.944221	Q8TB72	Pumilio homolog 2	PUM2	ADCKDFNRTPGSRQASPTEVVERLGPNTNPS	182
0.16828	-0.170054	0.403806	-0.91754	0.123986	-0.131136	0.475287	-0.830246	-0.279882	-0.00249473	0.0060478	0.792719	0.999954	Q8TBN0	Guanine nucleotide exchange factor for Rab-3A	RAB3IL1	EVTALKTLVITSTPASPNRELHPQLLSPTKA	168
0.919879	-0.857703	0.868957	-1.07457	0.51559	-0.393241	0.391777	-0.571241	0.609336	-0.607124	0.622285	-0.846813	0.999757	Q8TC07	TBC1 domain family member 15	TBC1D15	SNALPTLSASGARNDSPTQIPVSSDVCRLTP	675
-0.319145	0.317371	-0.358814	0.569658	-0.536957	0.396712	-0.398177	0.794404	-0.348046	0.302655	-0.299102	0.635481	1	Q8TCJ2	Dolichyl-diphosphooligosaccharide--protein glycosyltransferase subunit STT3B	STT3B	YLGDDMKRENPPVEDSSDEDDKRNQGNLYDK	498
-0.455048	0.453274	-0.714146	0.600454	-0.322937	0.261576	-0.26304	0.750275	-0.154767	0.156979	-0.337177	0.40748	1	Q8TDD1	ATP-dependent RNA helicase DDX54	DDX54	LYQKWKQKQKIDDRDSDEEGASDRRGPERRG	782
-1.61538	1.6136	-1.8869	3.08579	-1.47556	1.36169	-1.36315	1.6246	-1.71402	1.71623	-2.01632	1.88817	1	Q8TDX7	Serine/threonine-protein kinase Nek7	NEK7	___________MDEQSQGMQGPPVPQFQPQK	5
-1.29717	1.97118	-1.34924	1.27606	-2.18581	1.86767	-1.50228	1.51045	-0.754496	0.905343	-1.4724	0.753155	0.954232	Q8TDY2	RB1-inducible coiled-coil protein 1	RB1CC1	ITDLLSEQKASVSQTSPQSASSPRMESTAGI	647
-0.4459	0.477357	-0.648771	0.424787	-1.05921	0.714449	-0.715914	1.1134	-0.290507	0.37381	-0.583956	0.289166	1	Q8TEQ6	Gem-associated protein 5	GEMIN5	EESMKENSGPVENGVSDQEGEEQAREPELPC	778
0.0438601	-0.0964523	0.0359969	-0.0440821	0.0149511	-0.118746	0.251216	-0.0124721	0.00650998	-0.345043	-0.00877943	0.378819	0.999637	Q8TEW0	Partitioning defective 3 homolog	PARD3	RWSTTAGFLKQNTAGSPKTCDRKKDENYRSL	187
0.247807	-0.249581	0.673094	-0.339951	0.614402	-0.621552	0.961047	-0.637905	0.198295	-0.196083	0.549472	-0.454426	0.999266	Q8TF01	Arginine/serine-rich protein PNISR	PNISR	RSRDRRKIDDQRGNLSGNSHKHKGEAKEQER	650
-0.472286	0.197761	-0.186507	0.915051	-0.623836	0.274808	-0.276273	0.509241	-0.477772	0.190124	-0.186571	0.60775	0.874003	Q8TF01	Arginine/serine-rich protein PNISR	PNISR	LKRKRESERTFSRSGSISVKIIRHDSRQDSK	726
0.0396152	0.15088	-0.134971	-0.0607286	-0.00223487	0.128521	-0.137754	0.00471384	-0.0162282	0.300878	-0.0955386	0.0148869	0.998549	Q8TF74	WAS/WASL-interacting protein family member 2	WIPF2	PPPYRQPPGVPNGPSSPTNESAPELPQRHNS	267
0.203245	-0.205019	-0.84395	1.23644	0.906442	-0.265368	0.263903	-0.294673	1.66607	-0.869275	0.872828	-1.14789	1	Q8WU20	Fibroblast growth factor receptor substrate 2	FRS2	RLTSTSTSDTQNINNSAQRRTALLNYENLPS	339
0.93369	-0.851126	0.86238	-1.37138	0.256884	-0.264034	0.462462	-1.29854	0.698191	-0.444692	0.448245	-0.964124	0.996736	Q8WU79	Stromal membrane-associated protein 2	SMAP2	SNTLEKDLDLLASVPSPSSSGSRKVVGSMPT	219
-0.47943	0.477656	-0.520463	0.461033	-0.41326	0.385578	-0.387043	0.420347	-0.458295	0.583366	-0.342832	0.342832	0.999916	Q8WUA4	General transcription factor 3C polypeptide 2	GTF3C2	LLLKLSKDLDRPESQSPKRPPEDFETPSGER	167
-0.764482	0.762708	-2.45152	0.851116	-0.593228	0.586079	-0.873587	1.11554	-0.522227	0.524439	-0.780502	0.688942	0.999953	Q8WUB8	PHD finger protein 10	PHF10	KRKNKGTSDSSSGNVSEGESPPDSQEDSFQG	327
0.655237	-0.56745	0.578704	-0.985186	0.659656	-0.492372	0.490907	-0.610577	0.298688	-0.657376	0.584802	-0.30003	0.954531	Q8WUF5	RelA-associated inhibitor	PPP1R13L	PRSWQPVSRIPMPPSSPQPRGAPRQRPIPLS	358
2.14205	-2.14383	2.46007	-2.25419	0.610926	-1.38012	1.10211	-0.608447	0.78047	-0.778258	0.958218	-0.976959	0.999863	Q8WUF5	RelA-associated inhibitor	PPP1R13L	PLASDRRSDAGSYRRSLGSAGPSGTLPRSWQ	332
0.162507	-0.836579	-0.172926	0.798324	-0.120355	-0.833941	0.128441	0.302683	-0.00819405	0.0104058	-0.251731	0.846507	0.951618	Q8WUI4	Histone deacetylase 7	HDAC7	PLAQGGHRPLSRAQSSPAAPASLSAPEPASQ	487
1.07125	-1.33851	0.934658	-0.942743	1.49143	-1.16006	1.15859	-1.84303	0.176359	-0.862095	0.355784	-0.1777	0.975414	Q8WV44	E3 ubiquitin-protein ligase TRIM41	TRIM41	EKVGPGGSSVGSGDASSSRHHHRRRRLHLPQ	526
-1.61627	1.54849	-1.53724	2.16152	-1.51681	1.17307	-1.17453	2.26608	-0.847534	0.849746	-1.07349	1.75626	0.900818	Q8WVB6	Chromosome transmission fidelity protein 18 homolog	CHTF18	PRTFEEALARGDAASSPAPAASVGSSQGGAR	64
-0.512432	0.556529	-0.572495	0.491319	-0.504643	0.383683	-0.385147	0.612241	-0.292382	0.294594	-0.493034	0.333323	0.968123	Q8WVC0	RNA polymerase-associated protein LEO1	LEO1	EEDKAQRLLKAKKLTSDEEGEPSGKRKAEDD	630
-0.506682	0.504908	-0.567142	0.524392	-0.499419	0.492269	-0.609402	0.902346	-0.442271	0.444483	-0.567245	0.548889	1	Q8WVC0	RNA polymerase-associated protein LEO1	LEO1	EDDDKANKKHKKYVISDEEEEDDD_______	658
0.935769	-0.924916	0.93617	-1.67777	0.936931	-0.770209	0.768744	-1.86451	0.444881	-0.385932	0.389485	-0.714766	1	Q8WVM8	Sec1 family domain-containing protein 1	SCFD1	HLNRVNLEESSGVENSPAGARPKRKNKKSYD	303
0.473875	-0.719274	0.720554	-0.494988	0.398353	-0.669856	0.635801	-0.395874	0.62131	-0.619099	0.77362	-0.631562	0.999174	Q8WWI1	LIM domain only protein 7	LMO7	TGHLVMDVRRYGKAGSPETKWIDATSGIYNS	1129
0.564936	-0.249139	0.0314645	-0.0395498	0.215067	0.00566927	-0.427039	-0.0127409	0.661185	-0.241982	0.188085	-0.188085	0.999999	Q8WWI1	LIM domain only protein 7	LMO7	TSGLDLMSESGEGEISPQREVSRSQDQFSDM	1026
-1.38989	1.10629	-1.09503	2.37888	-2.09978	1.27037	-1.27184	2.36326	-0.7557	0.664103	-0.66055	1.30639	1	Q8WWI1	LIM domain only protein 7	LMO7	NKEPVSLPGIMRRGESLDNLDSPRSNSWRQP	1510
0.856891	-0.858665	0.969038	-1.17866	1.15582	-1.16297	1.21325	-2.6914	0.24192	-0.307278	0.373155	-0.243261	1	Q8WWI1	LIM domain only protein 7	LMO7	LPGIMRRGESLDNLDSPRSNSWRQPPWLNQP	1516
0.369892	-0.371666	0.83865	-0.845345	0.0323603	-0.0395102	0.608919	-0.0355493	0.226785	-0.224573	0.689488	-2.38167	0.993914	Q8WWI1	LIM domain only protein 7	LMO7	TTGVATTQSPTPRSHSPSASQSGSQLRNRSV	1593
0.0636114	-0.282736	-0.07403	0.580468	0.0755001	-0.64652	-0.0674141	0.199792	-0.102238	-0.41007	0.0999684	0.40429	0.977551	Q8WWI1	LIM domain only protein 7	LMO7	RLFQKIYGENGSKSMSDVSAEDVQNLRQLRY	706
0.545919	-0.547693	0.651743	-2.16917	0.446314	-0.453464	0.534481	-1.82883	0.121275	-0.388784	0.117087	-0.117087	0.999228	Q8WWI1	LIM domain only protein 7	LMO7	AGSVKTSTTGVATTQSPTPRSHSPSASQSGS	1586
1.15295	-1.3527	1.19201	-1.17407	1.16174	-1.04498	1.04351	-1.83736	0.401002	-0.83799	0.431056	-0.402344	0.99986	Q8WWI1	LIM domain only protein 7	LMO7	LRSRSTQMESTRVSASLPRSYRKTDTVRLTS	895
0.468139	-1.07747	0.809443	-0.489253	0.994935	-1.00208	1.49509	-2.02208	0.787583	-0.785371	1.88626	-1.06891	0.932489	Q8WWK9	Cytoskeleton-associated protein 2	CKAP2	TLSRSIASEVIARPASLSNDKLMEKSEPVDQ	328
2.31238	-2.03528	2.04653	-2.66026	1.86291	-1.42872	1.42725	-3.29087	1.33084	-1.34335	1.18818	-1.18818	0.996789	Q8WWK9	Cytoskeleton-associated protein 2	CKAP2	YLQSVKKKVQFDGTNSAFKELKFLTPVRRSR	614
1.01352	-0.909976	0.92123	-1.88954	0.766694	-0.671716	0.670251	-1.84815	0.404212	-0.513808	0.329501	-0.329501	0.991605	Q8WWM7	Ataxin-2-like protein	ATXN2L	QRELRAAQLAREIESSPQYRLRIAMENDDGR	306
0.299703	-0.150968	0.162222	-0.419187	0.215967	-0.223117	0.310808	-0.599862	0.253923	-0.129703	0.133256	-0.46629	0.999445	Q8WWM7	Ataxin-2-like protein	ATXN2L	KEKEVDGLLTSEPMGSPVSSKTESVSDKEDK	594
0.160321	-0.126529	0.0651259	-0.0732111	0.0609547	-0.215227	-0.0131168	0.0212811	0.150082	-0.0096283	0.0131814	-0.0439966	0.999964	Q8WWM7	Ataxin-2-like protein	ATXN2L	EEKHSAVQRQGSGRESPSLASREGKYIPLPQ	339
0.608087	-0.915316	0.717294	-0.629201	0.774314	-0.77235	0.770885	-1.06719	0.808901	-0.80669	0.950282	-0.988205	0.983767	Q8WWM7	Ataxin-2-like protein	ATXN2L	LSSLPPRGPHHLDNSSPGPGSEARGINGGPS	391
-0.149238	-0.221595	0.13882	0.16072	-0.0759688	0.00937438	-0.010839	0.308192	-0.197398	-0.301168	0.297567	0.196057	1	Q8WWM7	Ataxin-2-like protein	ATXN2L	IGSARGQSTGKGPPQSPVFEGVYNNSRMLHF	111
0.376143	-0.377917	0.478724	-0.433798	0.406229	-0.413379	0.653598	-0.461476	0.103413	-0.784636	0.176446	-0.104755	0.984646	Q8WWM7	Ataxin-2-like protein	ATXN2L	ELRKFGAQFKLQPSSSPENSLDPFPPRILKE	559
0.700607	-0.625778	0.637032	-1.8941	0.526575	-0.505663	0.504198	-1.66749	0.496244	-0.494033	0.498946	-1.89478	0.949902	Q8WWM7	Ataxin-2-like protein	ATXN2L	SPKAQRPLRGAKTLSSPSNRPSGETSVPPPP	424
-0.769268	0.446956	-0.435702	0.812112	-0.797994	0.180139	-0.181604	0.640089	-0.430111	0.432287	-0.428734	0.463354	1	Q8WWQ0	PH-interacting protein	PHIP	TRNQGRRTAFYNEDDSEEEQRQLLFEDTSLT	1783
1.13509	-1.13607	1.14732	-1.7971	1.11691	-0.960689	0.959225	-2.14489	1.14741	-1.12841	1.13196	-1.9983	1	Q8WWQ0	PH-interacting protein	PHIP	STSEVHSPPNVGLRRSGQIEGVRQMHSNAPR	692
0.111787	-0.267496	0.456867	-0.132901	0.428221	-0.435371	0.846502	-1.10163	-0.363365	-0.0940606	0.308578	0.0985418	0.97983	Q8WWQ0	PH-interacting protein	PHIP	KRGPGRKPKVEVNTNSGEIIHKKRGRKPKKL	1651
-0.338998	-0.111659	0.122913	0.508827	-0.619203	-0.424065	0.4226	0.917174	-0.817373	-0.173427	0.17698	0.568224	1	Q8WX93	Palladin	PALLD	PAGFPKKASRTARIASDEEIQGTKDAVIQDL	893
1.27794	-1.27971	1.66652	-1.99077	1.40449	-1.41164	1.66329	-2.3987	1.29774	-1.29553	1.48627	-1.59787	0.813613	Q8WX93	Palladin	PALLD	PMSALASRSAPAMQSSGSFNYARPKQFIAAQ	726
-0.297184	0.112559	-0.101305	0.195397	-0.0682311	-0.0468684	0.0454038	0.634531	-0.0994774	-0.0738585	0.0774116	0.219681	1	Q8WX93	Palladin	PALLD	SGHPHVRRPRSRSRDSGDENEPIQERFFRPH	1121
0.298319	0.0461078	-0.0348538	-0.953441	0.243445	0.0282784	-0.029743	-0.728284	0.198301	0.124872	-0.121319	-0.206367	0.965525	Q8WXF1	Paraspeckle component 1	PSPC1	VHNDRFPQGPPSQMGSPMGSRTGSETPQAPM	477
0.279826	0.00684066	0.00441343	-0.900984	0.387528	0.026136	-0.0276006	-0.138947	0.528452	-0.307598	0.311151	-0.98367	1	Q8WXG6	MAP kinase-activating death domain protein	MADD	SSVIKHSPTVKREPPSPQGRSSNSSENQQFL	930
0.295017	-0.223969	-0.0584466	0.0503614	0.630921	-1.00485	0.72246	-0.628442	1.11611	-1.1139	1.11818	-2.01073	0.944582	Q8WYL5	Protein phosphatase Slingshot homolog 1	SSH1	FFMVKGAALFLQQGSSPQGQRSLQHPHKHAG	57
-1.92791	1.64301	-1.63175	2.26369	-1.60636	1.4557	-1.45716	2.32309	-1.75249	1.5122	-1.50865	2.20862	0.999996	Q8WYP5	Protein ELYS	AHCTF1	LRSTPLASPSPSPGRSPQRLKETRISFVEED	1222
0.158843	0.401697	-0.169262	-1.18101	0.17627	0.404252	-0.168184	-1.17838	0.172707	0.235033	-0.174977	-1.18124	0.997756	Q8WYP5	Protein ELYS	AHCTF1	ESVEIINDLKVSTVTSPSRMIRKLRSTNLDA	1898
-0.661116	0.789444	-0.780958	0.640002	-0.763576	0.867549	-0.971628	0.766055	-0.475454	0.785144	-0.376276	0.376276	0.993988	Q92522	Histone H1x	H1FX	GMAKKVTKAGGSAALSPSKKRKNSKKKNQPG	31
0.0908032	-0.035256	0.0465101	-1.01852	0.101339	-0.0874232	0.0859586	-0.828022	0.00341488	-0.00120312	0.140678	-1.42311	0.97499	Q92530	Proteasome inhibitor PI31 subunit	PSMF1	IITPIHEQWEKANVSSPHREFPPATAREVDP	153
-2.53364	0.946606	-0.935352	1.11624	-1.39017	0.934689	-0.30133	0.309495	-1.08547	1.08768	-1.5744	1.27836	0.930926	Q92538	Golgi-specific brefeldin A-resistance guanine nucleotide exchange factor 1	GBF1	ACDFEKPESPRAASSSSPGSPVASSPSRLSP	1780
-1.76261	1.4689	-1.12593	1.11784	-2.71853	1.99138	-1.99284	2.05639	-1.66775	2.30366	-2.07019	1.66641	0.999956	Q92538	Golgi-specific brefeldin A-resistance guanine nucleotide exchange factor 1	GBF1	EKPESPRAASSSSPGSPVASSPSRLSPTPDG	1784
2.38608	-2.333	2.08819	-2.09627	1.65084	-1.24259	1.24112	-1.99345	1.03446	-0.852779	0.856332	-1.26561	0.884192	Q92541	RNA polymerase-associated protein RTF1 homolog	RTF1	KVHDFDVKIDLQVPSSESKALAITSKAPPAK	675
-0.697801	0.586513	-0.575259	0.77537	1.41408	-1.42123	1.60234	-3.24191	0.0858235	-0.15472	0.246759	-0.0871648	0.916015	Q92575	UBX domain-containing protein 4	UBXN4	QTSVRVTSSEPPNPASSSKSEKREPVRKRVL	456
-0.250898	0.308952	-0.497414	0.229785	-0.17206	0.579972	-0.272031	0.174539	-0.121396	0.456408	-0.489712	0.120054	0.986652	Q92576	PHD finger protein 3	PHF3	EDQENNLQDNQTSNSSPCRSNVGKGNIDGNV	1614
-0.218089	0.347515	-0.296994	0.196976	-0.166175	0.291675	-0.485937	0.168654	-0.238068	0.26584	-0.428794	0.236726	1	Q92598	Heat shock protein 105 kDa	HSPH1	NTCEPVVTQPKPKIESPKLERTPNGPNIDKK	809
-0.65371	0.637862	-0.582101	0.574016	-0.456247	0.328605	-0.33007	0.559961	-0.299559	0.301771	-0.31051	0.608939	1	Q92614	Unconventional myosin-XVIIIa	MYO18A	SSSPTSYWKSLAPDRSDDEHDPLDNTSRPRY	2020
0.493218	-0.339132	0.350386	-1.23473	0.400833	-0.0539245	0.0524599	-1.28543	0.242274	-0.0310778	0.0346308	-0.109708	0.909741	Q92615	La-related protein 4B	LARP4B	SYAEICQRTSKEPPSSPLQPQKEQKPNTVGC	664
-1.64741	1.64564	-1.77202	1.7545	-1.6838	1.67665	-1.75977	2.00189	-1.79409	1.7963	-1.81533	1.93424	1	Q92615	La-related protein 4B	LARP4B	AMGKRLSREQSTPPKSPQ_____________	736
-0.659756	0.702626	-1.2009	0.638643	-0.916418	1.08748	-1.8278	0.918897	-0.719412	0.958515	-1.11326	0.718071	0.997785	Q92625	Ankyrin repeat and SAM domain-containing protein 1A	ANKS1A	TCSPTEDATMGSRSESLSNCSIGKKRLEKSP	647
0.322034	-0.323809	0.958882	-0.927358	0.34353	-0.492617	1.18599	-0.341051	0.255882	-0.25367	1.08989	-0.494718	0.885608	Q92625	Ankyrin repeat and SAM domain-containing protein 1A	ANKS1A	AISCHSLDSMASGRSSDQDSTNKEAEAAGVK	382
-1.61286	0.586492	-0.575238	1.23032	-1.37537	0.43384	-0.435305	1.55598	-0.255998	0.25821	-0.572178	1.37903	1	Q92685	Dol-P-Man:Man(5)GlcNAc(2)-PP-Dol alpha-1,3-mannosyltransferase	ALG3	___MAAGLRKRGRSGSAAQAEGLCKQWLQRA	13
0.465764	-0.529469	0.946252	-0.486877	0.461327	-0.468477	1.03973	-0.595176	0.159912	-0.165131	0.409956	-0.161253	0.977403	Q92734	Protein TFG	TFG	NDTVDGREEKSASDSSGKQSTQVMAASMSAF	153
-0.139896	0.393679	-0.198988	0.118783	-0.589799	0.214838	-0.0766505	0.0848148	-0.139674	0.141886	-0.35732	0.186341	0.988834	Q92738	USP6 N-terminal-like protein	USP6NL	LPVDTGAGGYSGNSGSPKNGKLIIPPVDYLP	716
-0.273857	-0.0362074	0.0474615	0.575279	-0.151296	0.0621463	-0.0636109	0.766977	-0.0335939	0.0358057	-0.508774	0.376102	1	Q92754	Transcription factor AP-2 gamma	TFAP2C	ALIVIDKSYMNPGDQSPADSNKTLEKMEKHR	434
1.28459	-1.28636	1.50809	-2.06776	1.08964	-1.09679	1.54568	-2.15202	1.57873	-1.83807	1.59329	-1.58007	0.756263	Q92793	CREB-binding protein	CREBBP	PSALQDLLRTLKSPSSPQQQQQVLNILKSNP	2079
-0.939697	0.937923	-1.70137	1.13888	-1.09999	1.09284	-1.40796	1.63969	-0.922584	0.924796	-1.67535	1.40267	0.940373	Q92804	TATA-binding protein-associated factor 2N	TAF15	PYNNQGQQQNMESSGSQGGRAPSYDQPDYGQ	97
0.292243	0.108403	-0.542198	-0.107844	0.272708	0.147027	-0.685137	-0.154099	0.234341	0.189864	-0.684979	-0.185383	0.987932	Q92887	Canalicular multispecific organic anion transporter 1	ABCC2	NSGARLPGLNKNQSQSQDALVLEDVEKKKKK	283
1.12727	-1.37802	1.44122	-1.14839	1.24028	-1.24743	1.70886	-2.32176	0.558387	-0.556175	1.01962	-0.851841	0.999991	Q92890	Ubiquitin fusion degradation protein 1 homolog	UFD1L	HSGYAGELGFRAFSGSGNRLDGKKKGVEPSP	231
0.287433	-1.19832	0.491269	-0.308546	0.389854	-0.218472	0.217007	-1.25608	0.390083	-0.387871	0.571957	-0.676882	1	Q92890	Ubiquitin fusion degradation protein 1 homolog	UFD1L	DEAGGRFVAFSGEGQSLRKKGRKP_______	299
-0.501984	0.50021	-0.529811	0.503421	-0.455208	0.448058	-0.550381	0.55759	-0.412442	0.414654	-0.45327	0.502409	1	Q92922	SWI/SNF complex subunit SMARCC1	SMARCC1	SFRQRISTKNEEPVRSPERRDRKASANARKR	310
0.747092	-0.648488	0.659742	-1.22887	0.894377	-0.628116	0.626651	-1.71579	0.582313	-0.580101	0.739764	-2.0302	1	Q92922	SWI/SNF complex subunit SMARCC1	SMARCC1	VLADTPSGLVPLHLRSPQVPAAQQMLNFPEK	573
0.903206	-0.746788	0.758042	-1.19766	0.851942	-0.848033	0.846568	-1.54217	0.658553	-0.656341	1.59368	-0.842691	1	Q92922	SWI/SNF complex subunit SMARCC1	SMARCC1	KSGKKGQASLYGKRRSQKEEDEQEDLTKDME	357
0.863828	-0.865602	1.39507	-1.27033	0.661772	-0.668922	1.36742	-1.22878	0.274419	-0.457362	0.915395	-0.27576	1	Q92945	Far upstream element-binding protein 2	KHSRP	PPNGDPNFKLFIIRGSPQQIDHAKQLIEEKI	480
0.0694351	-0.0867807	0.515908	-0.0905485	0.184042	-0.191192	0.549885	-0.274732	0.196522	-0.194311	0.342493	-0.300732	0.999964	Q92945	Far upstream element-binding protein 2	KHSRP	QINKIQQDSGCKVQISPDSGGLPERSVSLTG	181
0.212834	-0.407559	0.141568	-0.149654	0.0255775	-0.164026	-0.0174915	0.646383	0.0990841	-0.442921	0.0804202	-0.0804202	0.986066	Q92974	Rho guanine nucleotide exchange factor 2	ARHGEF2	REPALPLEPDSGGNTSPGVTANGEARTFNGS	696
0.00937131	-0.0111454	-0.0242115	0.0533393	0.118479	-0.150302	0.0249567	-0.0167924	0.0868294	-0.0846177	0.158158	-0.182414	1	Q92974	Rho guanine nucleotide exchange factor 2	ARHGEF2	SVHRNFEDRERQELGSPEERLQDSSDPDTGS	932
0.846959	-1.02248	1.24896	-0.868072	0.789564	-0.796713	0.914425	-1.1964	0.544574	-0.818267	0.924185	-0.545915	1	Q92979	Ribosomal RNA small subunit methyltransferase NEP1	EMG1	__MAAPSDGFKPRERSGGEQAQDWDALPPKR	14
0.206475	-0.593093	0.751779	-0.227589	1.02749	-1.03464	1.18563	-1.55366	1.07072	-1.16461	1.57242	-1.07206	0.999998	Q93008	Probable ubiquitin carboxyl-terminal hydrolase FAF-X	USP9X	TGQRAQENYEGSEEVSPPQTKDQ________	2547
-0.47869	0.476916	-0.535157	0.724644	-0.567132	0.529383	-0.530847	0.935942	-0.517066	0.499642	-0.496089	0.644726	1	Q93009	Ubiquitin carboxyl-terminal hydrolase 7	USP7	HQQQQQQQKAGEQQLSEPEDMEMEAGDTDDP	18
-0.389144	0.3036	-0.292346	1.09907	-0.51373	0.463503	-0.464968	0.876602	-0.493138	0.49535	-0.554764	0.637913	1	Q969H6	Ribonuclease P/MRP protein subunit POP5	POP5	QKSVTRSCLLEEEEESGEEAAEAME______	154
0.757286	-0.75906	1.16713	-1.32215	1.13234	-1.13949	1.47325	-2.60234	1.23491	-0.785755	0.789308	-1.38899	0.994462	Q969J3	Loss of heterozygosity 12 chromosomal region 1 protein	LOH12CR1	PTFQPLLKGLLSGQTSPTNAKLEKLDSQQVL	75
-0.268983	0.461329	-0.542021	0.247869	-0.112689	0.0937411	-0.0952057	0.132831	-0.299635	0.323849	-0.612959	0.298294	0.994085	Q969S3	Zinc finger protein 622	ZNF622	MNAAIQQAIKAQPSMSPKKAPPAPAKEARNV	143
-0.488569	0.921396	-0.904701	0.467456	-0.603174	0.506188	-0.507653	0.825348	-0.52115	0.626127	-0.59738	0.519809	0.99988	Q969T4	Ubiquitin-conjugating enzyme E2 E3	UBE2E3	________MSSDRQRSDDESPSTSSGSSDAD	8
0.951286	-0.236056	0.24731	-1.22779	0.617402	-0.272498	0.271033	-0.716256	1.46934	0.0741874	-0.0706344	-0.690843	1	Q969V6	MKL/myocardin-like protein 1	MKL1	ILVKEEGPRAGSCCLSPGGRAELEGRDKDQM	511
-0.0712965	0.26178	0.060878	-0.436524	0.169608	-0.139731	0.138267	-0.280748	-0.371235	0.401667	-0.266229	0.266229	0.999908	Q969W3	Protein FAM104A	FAM104A	ADAGSSGGTGPTEGYSPPAASTRAAARAKAR	21
0.231004	-0.262368	0.53241	-0.252117	0.348652	-0.355801	0.692631	-0.359223	0.388123	-0.455931	0.695275	-0.389465	0.920557	Q96AE4	Far upstream element-binding protein 1	FUBP1	WAEYYRQQAAYYAQTSPQGMPQHPPAPQGQ_	630
-0.445581	-0.942907	3.4679	0.424468	0.356973	-1.15728	2.63043	-0.354494	-0.329921	-0.470301	3.34771	0.32858	0.885551	Q96AT1	Uncharacterized protein KIAA1143	KIAA1143	QDSVKKNSQKQIKNSSLLSFDNEDENE____	143
-0.815529	0.0371675	-0.0259134	0.932769	-0.483729	-0.113917	0.112453	0.430912	-0.165793	-0.0126347	0.0161877	0.0300315	0.999985	Q96AT1	Uncharacterized protein KIAA1143	KIAA1143	VKKNSQKQIKNSSLLSFDNEDENE_______	146
-0.0426823	0.0409082	-0.632062	1.45341	-0.473232	0.45816	-0.459625	2.24707	-0.419224	0.355262	-0.351709	1.61533	1	Q96B01	RAD51-associated protein 1	RAD51AP1	LSVKELPTVTTNVQNSQDKSIEKHGSSKIET	120
0.0449252	-0.0466993	0.254867	-0.175102	-0.0777256	0.0705757	0.156209	-0.852307	-0.279908	-0.0315608	0.0414542	0.036042	0.999999	Q96B01	RAD51-associated protein 1	RAD51AP1	GSRSSSSPLVVVSVKSPNQSLRLGLSRLARV	327
-0.131135	-0.155588	0.120716	0.134816	-0.281538	-0.388725	0.289624	0.820161	-0.0544968	-0.634668	0.176129	0.0531555	0.982612	Q96B23	Uncharacterized protein C18orf25	C18orf25	VISSMPCLLMELRRDSSESQLASTESDKPTT	66
-0.630201	0.628427	-0.751999	1.06957	-0.57581	0.56866	-1.01846	1.29152	-0.372505	0.374716	-0.612279	0.975926	0.996906	Q96B36	Proline-rich AKT1 substrate 1	AKT1S1	RTEARSSDEENGPPSSPDLDRIAASMRALVL	212
0.0736082	0.390809	-0.0840267	-0.948988	0.468339	-0.35864	0.357175	-0.576673	0.287857	-0.435952	0.123415	-0.123415	0.999971	Q96C19	EF-hand domain-containing protein D2	EFHD2	LLRRADLNQGIGEPQSPSRRVFNPYTEFKEF	74
-0.633878	0.503363	-0.492109	0.564885	-0.156228	0.149078	-0.187249	0.360595	-0.334	0.235152	-0.224494	0.224494	1	Q96C57	Uncharacterized protein C12orf43	C12orf43	RLFFTSVPGGREKEESPQPRRKRQPSSSSED	138
-0.632256	-0.0424681	0.0537221	0.0708673	-0.577274	0.257769	-0.259234	0.749031	-0.0839989	0.276995	0.0817294	-0.341167	0.998081	Q96C90	Protein phosphatase 1 regulatory subunit 14B	PPP1R14B	TAGGAALAAPAPGPGSGGPGPRVYFQSPPGA	21
1.11624	-1.05527	1.06652	-1.42868	1.00023	-0.925149	0.923685	-1.19809	0.304354	-1.79857	0.15105	-0.15105	1	Q96C90	Protein phosphatase 1 regulatory subunit 14B	PPP1R14B	PGPGSGGPGPRVYFQSPPGAAGEGPGGADDE	32
-0.0960682	-0.0339547	0.0452088	0.828323	0.016853	-0.269533	-0.00876705	0.342585	-0.0417193	0.0439311	-0.403188	0.307891	0.991012	Q96CB8	Integrator complex subunit 12	INTS12	PPPLTLGKTGLSRSVSCDNVSKVGLPSPSSL	378
-0.0440199	-0.00560634	0.0168604	0.014204	0.0787449	-0.0858949	0.120337	-1.05457	-0.0215726	0.0237843	0.220207	-0.890331	0.999893	Q96CP2	FLYWCH family member 2	FLYWCH2	PSEQEGESVKASQEPSPKPGTEVIPAAPRKP	21
-0.186133	0.29431	0.0338525	-0.0419378	-0.675966	0.425649	-0.427114	0.533412	-0.67987	0.437175	-0.335683	0.335683	0.999998	Q96CP6	GRAM domain-containing protein 1A	GRAMD1A	SDITSSGAADRSQEPSPVGSRRGHVTPNLSR	267
-0.345635	0.343861	-0.598617	0.506591	-0.31156	0.30441	-0.442065	0.720233	-0.27621	0.278422	-0.344959	0.469911	0.991398	Q96D71	RalBP1-associated Eps domain-containing protein 1	REPS1	PPPPPRPQPSHSRSSSLDMNRTFTVTTGQQQ	562
0.075859	-0.389085	-0.0862775	0.176729	0.531861	-0.495525	0.494061	-2.57132	0.297687	-0.591877	0.292261	-0.292261	1	Q96DT7	Zinc finger and BTB domain-containing protein 10	ZBTB10	DGSGAEGGSCSSSRRSGGDGGDEVEGSGVGA	210
0.315997	0.0165099	-0.17432	-0.0159508	1.54168	0.412594	-0.414059	-2.03577	-0.214777	0.96765	0.212507	-1.81489	0.992501	Q96EB6	NAD-dependent protein deacetylase sirtuin-1;SirtT1 75 kDa fragment	SIRT1	__MADEAALALQPGGSPSAAGADREAASSPA	14
0.259931	-0.119622	0.130876	-0.230487	0.306353	0.438443	-0.330135	-0.303874	0.294611	-0.163669	0.167222	-0.552274	1	Q96EB6	NAD-dependent protein deacetylase sirtuin-1;SirtT1 75 kDa fragment	SIRT1	GGSPSAAGADREAASSPAGEPLRKRPRRDGP	27
0.122798	0.48358	-0.44309	-0.143912	0.11853	0.427759	-0.237183	-0.116051	0.0200423	0.573883	-0.399555	-0.0213836	1	Q96EB6	NAD-dependent protein deacetylase sirtuin-1;SirtT1 75 kDa fragment	SIRT1	PLRKRPRRDGPGLERSPGEPGGAAPEREVPA	47
-0.111307	0.125701	-0.217986	0.0901931	-0.15045	0.1433	-0.172918	0.261152	-0.0649765	0.11746	-0.225845	0.0636352	1	Q96F86	Enhancer of mRNA-decapping protein 3	EDC3	NIPKRTDVKSQDVAVSPQQQQCSKSYVDRHM	131
-0.0955987	-0.054952	0.066206	0.212372	0.157203	-0.39828	0.32314	-0.154725	0.0105849	-0.070132	-0.00613236	0.00613236	1	Q96FF9	Sororin	CDCA5	LKRIVAHAVEVPAVQSPRRSPRISFFLEKEN	75
0.174302	-0.176077	-0.920583	1.12264	0.212181	-0.391174	0.673291	-0.209702	-0.185902	-0.288909	0.183633	0.474709	0.994822	Q96FJ0	AMSH-like protease	STAMBPL1	ADQPNKSDATNYASHSPPVNRALTPAATLSA	242
-0.419727	0.417953	-0.566371	0.401642	-0.451771	0.270165	-0.27163	0.492554	-0.332147	0.31388	-0.310327	0.608062	1	Q96GM8	Target of EGR1 protein 1	TOE1	___________MAADSDDGAVSAPAASDGGV	5
1.02827	-0.815227	0.764864	-0.772949	1.15005	-0.936577	0.813789	-0.805625	1.62695	-1.54288	1.54643	-2.59596	1	Q96GX5	Serine/threonine-protein kinase greatwall	MASTL	EKTSPKGVENPAVQESNQKMLGPPLEVLKTL	631
0.00972665	0.390389	-0.0201452	-0.194635	0.0258967	0.393768	-0.0178107	-0.191851	0.0126399	0.484977	-0.0149094	-0.251433	0.995921	Q96GX9	Methylthioribulose-1-phosphate dehydratase	APIP	DMFVCDINEKDISGPSPSKKLKKSQCTPLFM	87
1.33912	-0.995403	1.00666	-1.97498	0.851361	-0.578281	0.576816	-1.28996	0.589614	-0.653003	0.142633	-0.142633	1	Q96GY0	Zinc finger C2HC domain-containing protein 1A	ZC2HC1A	ASSLNGGNIKGIEGHSPGNLPKFCHECGTKY	292
0.77396	-0.920275	1.78692	-0.795074	0.927569	-0.954363	2.13601	-0.92509	0.619065	-0.973182	1.756	-0.620406	0.960426	Q96H79	Zinc finger CCCH-type antiviral protein 1-like	ZC3HAV1L	KHMKLHKMLENTDNSSPSTEHSQGLEKQGVH	257
-0.656066	0.412976	-0.401722	0.60955	-0.425749	0.418599	-0.576398	0.484939	-0.399948	0.40216	-0.441087	0.482419	0.999962	Q96HB5	Coiled-coil domain-containing protein 120	CCDC120	SPPKAWDQLRAVSGGSPERRTPWKPPPSDLY	256
1.39636	-1.39813	1.4195	-1.60103	0.317487	-0.357529	0.576324	-0.315008	0.617383	-0.825475	0.628369	-0.618724	1	Q96HC4	PDZ and LIM domain protein 5	PDLIM5	HLKESEADNTKKANNSQEPSPQLASSVASTR	309
0.873613	-1.00489	1.08884	-0.894726	0.54691	-0.75051	0.683005	-0.544431	0.956466	-0.954254	1.1855	-1.11642	1	Q96HC4	PDZ and LIM domain protein 5	PDLIM5	SEADNTKKANNSQEPSPQLASSVASTRSMPE	313
0.328606	-1.07701	0.668958	-0.34972	-0.0139399	-0.306559	0.601523	0.0164189	0.204413	-0.719946	0.796042	-0.205754	1	Q96HC4	PDZ and LIM domain protein 5	PDLIM5	CSETSQELAEGQRRGSQGDSKQQNGPPRKHI	228
-0.104238	0.102464	-0.534197	0.134377	-0.227534	0.220384	-0.771509	0.496039	-0.0608154	0.0630271	-0.769601	0.148638	1	Q96I24	Far upstream element-binding protein 3	FUBP3	QVAFYGQTLGQAQAHSQEQ____________	569
-0.577045	0.575271	-0.58409	0.794789	-0.285916	0.278766	-0.651737	0.599808	-0.248685	0.250897	-0.58003	0.456568	1	Q96I25	Splicing factor 45	RBM17	DRHEASGFARRPDPDSDEDEDYERERRKRSM	155
1.35521	-1.35698	2.00981	-2.37733	1.32471	-1.33186	1.69322	-2.89001	1.0029	-1.24429	1.23022	-1.00424	1	Q96I25	Splicing factor 45	RBM17	DSDEDEDYERERRKRSMGGAAIAPPTSLVEK	169
0.0824555	-0.0842296	0.538061	-0.563192	0.0959749	0.23006	-0.23814	-0.0934959	0.185748	0.127325	-0.123772	-0.366123	0.999998	Q96II8	Leucine-rich repeat and calponin homology domain-containing protein 3	LRCH3	QRDAVLDFVKQKASQSPQKQHPLLDGVDGEC	516
0.342511	-0.425291	0.565093	-0.363624	1.02002	-0.772103	0.770638	-1.06685	0.285264	-0.42945	0.619017	-0.286605	1	Q96II8	Leucine-rich repeat and calponin homology domain-containing protein 3	LRCH3	LRVAEITKEQRLRRESQYQENRGSLVVTNGG	352
1.0554	-1.05718	1.27201	-1.38545	1.03033	-1.03748	1.24906	-1.27136	0.84122	-0.839008	1.10838	-0.997656	0.999545	Q96J02	E3 ubiquitin-protein ligase Itchy homolog	ITCH	VDGQSKKTEKCNNTNSPKWKQPLTVIVTPVS	62
0.115168	-0.116942	0.168197	-0.364689	0.540393	-0.642614	0.569054	-0.537914	0.314296	-0.312084	0.424197	-0.549141	0.999636	Q96JH7	Deubiquitinating protein VCIP135	VCPIP1	QASMDRHLRDQSTEQSPSDLPQRKTEVVSSS	1132
-0.446917	0.603444	-1.5792	0.425804	-0.61626	0.547409	-0.494599	0.502763	-0.401091	0.494481	-1.76263	0.399749	0.930233	Q96JM3	Chromosome alignment-maintaining phosphoprotein 1	CHAMP1	LFPSSKKLKKDNQESSDAELSSSEYIKTDLD	627
-0.562905	0.561131	-0.550064	0.757225	-0.631794	0.388597	-0.390061	0.518274	-0.501655	0.506796	-0.673718	0.500314	1	Q96JM3	Chromosome alignment-maintaining phosphoprotein 1	CHAMP1	KPALFPEPAKTAPPASPEARKRALFPEPRKH	542
-0.501354	0.49958	-0.507322	0.569254	-0.534471	0.527321	-0.707998	0.769333	-0.577439	0.497831	-0.494278	0.671211	0.99781	Q96JM3	Chromosome alignment-maintaining phosphoprotein 1	CHAMP1	SPAASPESRKSARTTSPEPRKPSPSESPEPW	275
-1.685	1.08206	-1.0708	2.24235	-1.67661	1.51963	-1.52109	3.02721	-1.50627	1.31549	-1.31194	2.61705	0.989054	Q96JP5	E3 ubiquitin-protein ligase ZFP91	ZFP91	PPDVPGQQPQAAKSPSPVQGKKSPRLLCIEK	103
0.864303	-0.866077	0.906331	-1.61543	0.95455	-0.829935	0.82847	-2.54496	0.992932	-0.990721	1.04429	-1.4435	0.999994	Q96KQ7	Histone-lysine N-methyltransferase EHMT2	EHMT2	NSGGGLSEELGSARRSGEVTLTKGDPGSLEE	246
-0.253291	0.583141	0.0316406	-0.0397259	-0.150487	0.309011	0.137041	-0.128877	-0.112065	0.114277	0.157327	-0.679429	0.958134	Q96L91	E1A-binding protein p400	EP400	LAPVSGSGPGPSPARSSPVNRPSSATNKALS	721
-0.390348	0.354159	0.0885485	-0.0966337	-0.366639	0.401527	0.00629158	0.00187271	-0.118811	0.121023	0.130763	-0.419123	0.844124	Q96L91	E1A-binding protein p400	EP400	APVSGSGPGPSPARSSPVNRPSSATNKALSP	722
0.334797	-0.336571	0.801997	-0.704977	0.187495	-0.194645	0.645192	-0.349728	-0.0544032	0.0566149	0.709713	-0.734833	0.953394	Q96MG7	Melanoma-associated antigen G1	NDNL2	EENRARPQPSGPAPSS_______________	304
0.13492	-0.00487794	0.016132	-1.43734	0.325693	0.100142	-0.101607	-0.709159	0.109923	-0.107712	0.558713	-1.15577	0.999999	Q96MG7	Melanoma-associated antigen G1	NDNL2	STSRGPGGSQGSQGPSPQGARRAQAAPAVGP	64
-1.1657	0.819375	-0.808121	2.34178	0.0176742	-0.0248241	-0.140143	1.61083	-1.11169	1.04112	-1.03757	2.76506	0.99991	Q96MH2	Protein HEXIM2	HEXIM2	SPVALEEAKTSGAPGSPQTPPERHDSGGSLP	29
0.883658	-0.839377	0.850631	-1.00131	1.33148	-1.17011	1.16864	-2.11946	1.35288	-1.13228	1.13583	-1.31871	0.888654	Q96N46	Tetratricopeptide repeat protein 14	TTC14	EDPRDFYNSYKTQAGSSKTEKPYKSERHFSS	610
-1.8406	1.7662	-1.66609	1.658	-1.59789	1.61391	-1.64971	1.60037	-1.58368	1.73987	-1.76607	1.58234	0.998642	Q96N67	Dedicator of cytokinesis protein 7	DOCK7	RPASLNLNRSRSLSNSNPDISGTPTSPDDEV	900
-0.0557455	0.432932	-0.579765	0.034632	0.342085	-0.385785	0.470153	-0.339606	-1.14255	0.469055	-0.465502	1.91881	0.99547	Q96N67	Dedicator of cytokinesis protein 7	DOCK7	RGQLGTYTIASPPERSPSGSAFGSQENLRWR	1430
0.170045	-0.0648502	0.0761043	-1.46492	0.0830489	-0.0901989	0.153323	-0.22924	0.0598331	-0.0576214	0.157959	-1.56009	1	Q96NT5	Proton-coupled folate transporter	SLC46A1	LEKADPHLEFQQFPQSP______________	458
0.25576	-0.257534	0.380384	-1.84772	0.358881	-0.205382	0.203917	-2.30858	0.299841	-0.17146	0.175013	-0.424986	0.986492	Q96NT5	Proton-coupled folate transporter	SLC46A1	__________MEGSASPPEKPRARPAAAVLC	6
0.784295	-0.65435	0.665604	-1.17767	0.483413	-0.490563	0.611072	-2.05	0.556175	-0.553963	0.737032	-1.8164	1	Q96NW4	Ankyrin repeat domain-containing protein 27	ANKRD27	LSFERRQKSSEAPVQSPQRSVDSISQESSTS	634
-1.63168	1.15799	-1.09441	1.08633	-2.53094	1.41965	-1.42112	1.68509	-1.60625	1.2618	-1.25825	1.4654	0.999178	Q96NY9	Crossover junction endonuclease MUS81	MUS81	RLQRHRTSGGDHAPDSPSGENSPAPQGRLAE	95
-0.495004	0.498666	-0.638913	0.47389	-0.4154	0.40825	-0.412141	0.79191	-0.247946	0.250158	-0.567312	0.389443	0.999208	Q96P16	Regulation of nuclear pre-mRNA domain-containing protein 1A	RPRD1A	EQIKVDENENCSSLGSPSEPPQTLDLVRALQ	156
-1.6151	0.963874	-0.95262	2.37583	-1.31911	0.573672	-0.575137	1.19109	-1.7619	1.38284	-1.37929	1.70413	0.994936	Q96PK6	RNA-binding protein 14	RBM14	DRRLAELSDYRRLSESQLSFRRSPTKSSLDY	620
0.133467	-0.93024	0.611035	-0.15458	-0.126389	-0.545249	0.377908	0.128868	0.00312407	-0.205297	0.322621	-0.00446538	1	Q96PM5	RING finger and CHY zinc finger domain-containing protein 1	RCHY1	ICESYNTAQAGGRRISLDQQ___________	257
-0.610927	0.360932	-0.349678	0.565806	-0.393327	0.335157	-0.336621	0.617062	-0.458581	0.427089	-0.423535	0.59124	0.999166	Q96PN7	Transcriptional-regulating factor 1	TRERF1	MWPQMHLPDGRAQPGSPESSGQPKGAFGEQF	491
-0.0820116	0.0802374	-0.564801	0.679552	0.052706	-0.00287054	-0.27277	-0.00420107	-0.0942163	0.369793	-0.390578	0.092875	1	Q96PU4	E3 ubiquitin-protein ligase UHRF2	UHRF2	GQSKKQPSGTTKRPISDDDCPSASKVYKASD	667
1.2434	-0.881177	0.892431	-2.09005	1.09808	-0.729884	0.72842	-2.11144	0.810999	-0.571157	0.57471	-0.803515	0.999999	Q96PY5	Formin-like protein 2	FMNL2	WSRSIEDLHRGSNLPSPVGNSVSRSGRHSAL	183
0.019374	-0.169373	-0.0297925	0.207175	-0.185201	0.229971	-0.00937746	0.0175418	-0.110762	0.112974	-0.131452	0.339243	1	Q96Q15	Serine/threonine-protein kinase SMG1	SMG1	AVRSNTGQKTQPDVMSQNARKLIQKNLATSA	3556
-1.01273	0.258914	-0.24766	0.859051	-0.870089	0.148663	-0.150128	1.02823	-0.817647	0.207518	-0.203965	0.697091	1	Q96Q45	Transmembrane protein 237	TMEM237	SASLEGLAQTAGRRPSEGNEPSTKELKEHPE	62
0.370052	-0.346194	0.16315	-0.171235	0.549779	-0.502784	0.501319	-0.567416	0.596771	-0.593828	0.597381	-0.623576	1	Q96QG7	Myotubularin-related protein 9	MTMR9	RRQLAELETEDGMQESP______________	548
0.547528	-0.730335	1.16301	-0.568642	0.117787	-0.124936	1.09986	-0.434812	-0.328945	0.331157	0.476583	-0.484501	0.999999	Q96QK1	Vacuolar protein sorting-associated protein 35	VPS35	_________MPTTQQSPQDEQEKLLDEAIQA	7
-0.378995	0.354533	-0.343279	0.586992	-0.364895	0.357746	-0.394781	0.703059	-0.249597	0.251809	-0.496648	0.499929	1	Q96QR8	Transcriptional activator protein Pur-beta	PURB	KLYERRGGGSGGGEESEGEEVDED_______	304
-0.0299439	-0.0481321	0.177755	0.00883042	0.0153581	-0.106317	0.136125	-0.0128791	0.0185224	-0.0163107	0.254034	-0.146832	1	Q96RL1	BRCA1-A complex subunit RAP80	UIMC1	TQLSSSETFDLEREVSPGSRDILDGVRIIMA	463
1.23037	-1.17052	1.18178	-1.46533	1.35253	-1.35968	1.49678	-2.62602	1.28682	-1.28461	1.51964	-1.29447	1	Q96RL1	BRCA1-A complex subunit RAP80	UIMC1	DCLVDFKKQVTVQPGSRTRTKAGRGRRRKF_	705
0.0331654	0.506046	-0.0441084	-0.0542789	0.0210569	0.375563	-0.012971	-0.109532	-0.0360115	0.391705	0.0337421	-0.186113	1	Q96RT1	Protein LAP2	ERBB2IP	DCSVDLGISKSTEDLSPQKSGPVGSVVKSHS	857
0.795747	-0.209843	-1.56591	0.210403	-0.068331	0.061181	-0.683837	0.697251	-0.422904	0.425116	-0.858057	0.721958	0.999999	Q96RU3	Formin-binding protein 1	FNBP1	VEGRLPARSEQARRQSGLYDSQNPPTVNNCA	497
-0.652704	0.65093	-1.0597	0.693185	-0.528748	0.547629	-0.905706	0.531227	-0.458272	0.645758	-1.0488	0.456931	0.965841	Q96RU3	Formin-binding protein 1	FNBP1	DIEFEDYTQPMKRTVSDNSLSNSRGEGKPDL	296
0.00594717	0.267944	-0.0163657	-0.496139	-0.200077	0.192927	-0.268021	0.229137	-0.142836	0.181588	0.00696434	-0.00696434	0.999717	Q96RU3	Formin-binding protein 1	FNBP1	FEDYTQPMKRTVSDNSLSNSRGEGKPDLKFG	299
-0.0352685	0.299313	0.02485	-0.364358	-0.404281	0.290973	-0.176829	0.184993	-0.0337239	0.183076	-0.212612	0.0323826	0.998771	Q96S21	Ras-related protein Rab-40C	RAB40C	KGNSLKRSKSIRPPQSPPQNCSRSNCKIS__	268
0.950837	-0.831153	0.842407	-1.29656	1.02572	-0.892784	0.891319	-2.01876	0.58375	-0.519662	0.523215	-1.0284	0.999983	Q96S66	Chloride channel CLIC-like protein 1	CLCC1	AKPVSGQDTSGNTEGSPAAEKAQLKSEAAGS	509
1.31908	-1.11587	1.12712	-1.84836	1.22066	-1.05202	1.05056	-1.93823	1.1893	-0.79505	0.798603	-1.59124	0.989757	Q96S66	Chloride channel CLIC-like protein 1	CLCC1	PARGVAGPRGQDPVSSPCG____________	548
-0.299705	0.203057	-0.191803	0.360994	-0.26264	0.25549	-0.285664	0.418123	-0.363811	0.100054	-0.0965004	0.156143	1	Q96S99	Pleckstrin homology domain-containing family F member 1	PLEKHF1	AAQQRQEEAEEQGAGSPGQPAHLARPICGAS	227
0.875472	-0.747073	0.758327	-1.37727	0.18518	-0.0138708	0.0124062	-1.78325	0.137149	-0.13386	0.137413	-1.9662	1	Q96ST3	Paired amphipathic helix protein Sin3a	SIN3A	______MKRRLDDQESPVYAAQQRRIPGSTE	10
-0.596377	0.549352	-0.538098	0.571467	-0.510447	0.456677	-0.458142	0.765928	-0.516744	0.518955	-0.530074	0.597626	0.988537	Q96T23	Remodeling and spacing factor 1	RSF1	EPIETKFYETKEESYSPSKDRNIITEGNGTE	473
-1.01626	0.993994	-0.98274	1.3085	-0.914567	0.7821	-0.783565	1.34635	-1.05415	0.886802	-0.883249	1.32806	1	Q96T37	Putative RNA-binding protein 15	RBM15	SRRSLHLDKSSSRGGSREYDTGGGSSSSRLH	109
0.00781785	0.00158121	0.00967288	-0.0373415	0.229495	-0.433221	0.576174	-0.227016	-0.0240516	-0.819465	0.147603	0.0227103	1	Q96T58	Msx2-interacting protein	SPEN	DRDRDHERRPIERSQSPVHLRRPQSPGASPS	727
-0.554528	0.765475	-0.762923	0.533415	-0.582948	0.575798	-0.810078	0.649968	-0.483835	0.486046	-0.740858	0.517595	0.995238	Q96T58	Msx2-interacting protein	SPEN	RKSERIDREKLKRSNSPRGEAQKLLELKMEA	1857
-0.277836	0.276062	-0.544113	0.416554	-0.17394	0.16679	-0.399097	0.402654	-0.190739	0.19295	-0.517999	0.291292	0.976862	Q96T58	Msx2-interacting protein	SPEN	RSSRQISEDSERTGGSPSVRHGSFHEDEDPI	1261
0.646287	-0.648061	1.19447	-0.930176	0.66873	-0.319575	0.117435	-0.109271	0.276704	-0.737263	0.585677	-0.278045	1	Q96T88	E3 ubiquitin-protein ligase UHRF1	UHRF1	NSKREEEEQQEGGFASPRTGKGKWKRKSAGG	639
-0.679756	0.250585	-0.239331	1.27213	-0.384905	0.349829	-0.351293	1.41392	-0.946025	0.47703	-0.473477	1.09518	0.99996	Q96TC7	Regulator of microtubule dynamics protein 3	RMDN3	YSQRWKRTQRHGRSQSLPNSLDYTQTSDPGR	46
-0.102153	0.0294612	-0.0182071	0.121416	-0.502188	0.17412	-0.175585	0.367267	-0.193071	0.30431	-0.201476	0.191729	1	Q99543	DnaJ homolog subfamily C member 2;DnaJ homolog subfamily C member 2, N-terminally processed	DNAJC2	GRWFEAFVKRRNRNASASFQELEDKKELSEE	47
-0.39455	0.510821	-0.322275	0.31419	-0.41065	0.410008	-0.329053	0.337218	-0.175639	0.177851	-0.604503	0.318507	0.994339	Q99575	Ribonucleases P/MRP protein subunit POP1	POP1	WESRVQAYEEPSVASSPNGKESDLRRSEVPC	730
-0.835125	1.0857	-1.06095	0.814011	-0.841826	1.01334	-1.44329	0.844305	-0.82704	1.09419	-1.1829	0.825699	0.993478	Q99590	Protein SCAF11	SCAF11	STRNTRAETASQSQRSPISDNSGCDAPGNSN	338
-0.656059	0.606098	-0.594844	0.74679	-0.603084	0.595934	-0.627924	0.93998	-0.464906	0.467118	-0.480595	0.534707	0.999427	Q99590	Protein SCAF11	SCAF11	TSRENKRSQPRVKDSSPGEKSRSQSRERESD	902
-0.0935771	0.091803	-0.2481	0.0904387	-0.0212254	0.0140755	-0.247414	0.0473508	-0.131465	0.181601	-0.216617	0.130124	0.994409	Q99590	Protein SCAF11	SCAF11	KSKSSSFGRIDRDSYSPRWKGRWANDGWRCP	963
-0.615114	0.654623	-0.550394	0.542309	-1.03924	1.03209	-1.06784	1.10443	-0.728351	1.03195	-1.09596	0.72701	0.997675	Q99590	Protein SCAF11	SCAF11	LRSSVAAPEKSSSNDSVDEETAESDTSPVLE	405
-0.353885	0.352111	-0.428237	0.434484	-0.247976	0.240826	-0.358419	0.488851	-0.193025	0.195237	-0.474584	0.477658	1	Q99613	Eukaryotic translation initiation factor 3 subunit C;Eukaryotic translation initiation factor 3 subunit C-like protein	EIF3C;EIF3CL	DFESHITSYKQNPEQSADEDAEKNEEDSEGS	166
-0.434398	0.432624	-0.470324	0.688253	-0.525545	0.453595	-0.455059	0.725381	-0.511307	0.44268	-0.439127	0.585462	1	Q99613	Eukaryotic translation initiation factor 3 subunit C;Eukaryotic translation initiation factor 3 subunit C-like protein	EIF3C;EIF3CL	TKPVGGNYGKQPLLLSEDEEDTKRVVRSAKD	39
-0.908916	0.216973	-0.205719	1.6522	1.18577	-0.706194	0.435945	-0.427781	-0.101841	0.104052	-0.228772	0.57809	0.99986	Q99613	Eukaryotic translation initiation factor 3 subunit C;Eukaryotic translation initiation factor 3 subunit C-like protein	EIF3C;EIF3CL	KNEGYMRRGGYRQQQSQTAY___________	909
0.171206	-0.171359	0.182613	-0.439473	0.444076	-0.451226	0.518638	-0.961194	0.560601	-0.365284	0.349016	-0.349016	0.999999	Q99618	Cell division cycle-associated protein 3	CDCA3	GIARTPMKTSSGDPPSPLVKQLSEVFETEDS	87
1.08503	-0.941215	0.952469	-2.44181	0.620685	-0.627835	0.840235	-0.949211	0.976183	-0.684308	0.687861	-2.15034	0.781369	Q99700	Ataxin-2	ATXN2	EHKRGPEVTSQGVQTSSPACKQEKDDKEEKK	888
1.18424	-1.06727	1.07853	-2.31515	0.848555	-0.665251	0.663786	-1.35192	0.703499	-0.394813	0.398366	-0.663567	0.931125	Q99700	Ataxin-2	ATXN2	HKRGPEVTSQGVQTSSPACKQEKDDKEEKKD	889
1.80548	-1.79143	1.80269	-3.77695	1.55552	-1.52906	1.5276	-3.67475	1.49292	-1.63354	1.40105	-1.40105	0.887525	Q99700	Ataxin-2	ATXN2	WGSGRQNSPRMGQPGSGSMPSRSTSHTSDFN	521
0.0994152	0.26528	-0.109834	-0.999765	0.0712815	0.273772	-0.0631955	-1.16775	0.159412	0.0610989	-0.0575459	-1.19509	1	Q99700	Ataxin-2	ATXN2	SSEAKDSRLQDQRQNSPAGNKENIKPNETSP	758
1.65797	-1.65974	1.97852	-2.80689	1.36061	-1.36776	1.80758	-3.58181	0.430622	-0.605053	1.00619	-0.431963	1	Q99729	Heterogeneous nuclear ribonucleoprotein A/B	HNRNPAB	KVAQPKEVYQQQQYGSGGRGNRNRGNRGSGG	242
0.315224	-0.663944	2.74737	-0.336338	0.239613	-0.880164	0.506251	-0.237134	-0.721457	0.0879379	1.8135	-0.0834567	0.999998	Q99733	Nucleosome assembly protein 1-like 4	NAP1L4	___________MADHSFSDGVPSDSVEAAKN	5
0.222309	-0.191993	-0.552849	0.192553	0.115938	-0.289438	-0.107852	0.264145	0.0161474	-0.00625518	-1.14458	0.0107364	0.999976	Q99733	Nucleosome assembly protein 1-like 4	NAP1L4	_________MADHSFSDGVPSDSVEAAKNAS	7
1.41341	-0.316099	0.327353	-0.875089	1.22434	-0.168436	0.166971	-0.703911	1.45995	0.0417987	-0.0382457	-0.108751	0.998045	Q99741	Cell division control protein 6 homolog	CDC6	SDAKLEPTNVQTVTCSPRVKALPLSPRKRLG	45
-0.148251	-0.127266	0.38557	0.127138	-0.160462	0.153312	0.33489	-0.53757	-0.0124888	0.0147006	0.275122	-0.831725	0.989629	Q99959	Plakophilin-2	PKP2	ATYEGRWGRGTAQYSSQKSVEERSLRHPLRR	132
-0.77258	0.231988	-0.220734	0.869536	-0.363825	0.181229	-0.0857067	0.093871	-0.685264	0.448765	-0.374238	0.374238	0.997661	Q99961	Endophilin-A2	SH3GL1	GGFPCTTAPKIAASSSFRSSDKPIRTPSRSM	288
-0.0149158	0.38472	-0.738273	-0.00619761	-0.0429245	0.670134	-0.815761	0.0454035	0.179713	0.781655	-0.482909	-0.181055	0.998835	Q99996	A-kinase anchor protein 9	AKAP9	KLAQFRQRKAQSDGQSPSKKQKKKRKTSSSK	31
-0.230814	0.46814	-0.732726	0.209701	-0.360688	0.434622	-0.481985	0.363167	-0.287075	0.281062	-0.277509	0.453773	1	Q9BPX3	Condensin complex subunit 3	NCAPG	TKKIKTLHCEGTEINSDDEQESKEVEETATA	674
-0.0762476	-0.0717031	0.0658291	0.254106	-0.0533518	0.0462018	0.0807903	-0.341246	0.0898885	-0.0876767	0.157524	-0.433522	1	Q9BQG0	Myb-binding protein 1A	MYBBP1A	_____MESRDPAQPMSPGEATQSGARPADRY	11
-0.483066	0.854569	-0.377452	0.369366	-0.59193	0.607844	-0.334062	0.342227	-0.330266	0.781965	-0.288926	0.288926	0.999951	Q9BQG0	Myb-binding protein 1A	MYBBP1A	KLEKKDAKEIPSATQSPISKKRKKKGFLPET	1163
-0.273586	0.4339	-0.280525	0.252473	-0.128784	0.786985	-0.17893	0.131263	-0.226486	0.228698	0.346146	-0.452544	0.996604	Q9BQG0	Myb-binding protein 1A	MYBBP1A	QKKNQKPSQVNGAPGSPTEPAGQKQHQKALP	1267
-0.952215	0.614678	-0.603424	0.649576	-0.417647	0.410497	-0.438719	0.714542	-0.476795	0.427491	-0.423938	0.84205	0.999992	Q9BRD0	BUD13 homolog	BUD13	HGSSDISSPRRVHNNSPDTSRRTLGSSDTQQ	248
-0.250232	0.248458	-0.400326	0.626287	-0.524086	0.380537	-0.382001	0.984881	-0.0752074	0.0312381	-0.027685	0.255424	1	Q9BRJ6	Uncharacterized protein C7orf50	C7orf50	VQKAEALMRELDEEGSDPPLPGRAQRIRQVL	175
0.618202	-0.849906	0.463867	-0.471952	1.313	-1.15588	1.15441	-2.16837	-0.00984016	-0.287947	0.0075707	0.153604	0.999912	Q9BRP8	Partner of Y14 and mago	WIBG	__________MEAAGSPAATETGKYIASTQR	6
1.74217	-1.74395	2.31416	-3.71222	1.64511	-1.65226	2.25029	-3.15141	1.76578	-1.48858	1.49213	-2.60475	0.999515	Q9BSJ6	Protein FAM64A	FAM64A	SALGAVSQRIQESCQSGTKWLVETQVKARRR	106
0.501548	-0.503322	0.78528	-0.816017	0.362138	-0.369288	0.528843	-0.418704	0.389937	-0.387725	0.822861	-0.919926	1	Q9BSJ6	Protein FAM64A	FAM64A	MASRWQNMGTSVRRRSLQHQEQLEDSKELQP	16
0.0519504	-0.0950093	-0.0623689	0.0664664	0.0564357	-0.0275087	-0.531257	0.020437	-0.0330127	-0.0870444	0.234967	0.0316714	1	Q9BSM1	Polycomb group RING finger protein 1	PCGF1	_____________MASPQGGQIAIAMRLRNQ	3
-0.123775	-0.111739	0.113357	0.619773	-0.30875	-0.218208	0.216744	0.279153	-0.0331354	-0.0938505	0.0308659	0.241342	0.998833	Q9BST9	Rhotekin	RTKN	RRKEAQVLGKTSRRPSDSGPPAERSPCRGRV	106
-0.316685	0.506612	-0.415371	0.295571	-0.00754892	0.636203	-0.0667171	0.0100279	-0.00616636	0.520168	0.00389691	-0.188818	1	Q9BTA9	WW domain-containing adapter protein with coiled-coil	WAC	SGDHRHEKMRDAGDPSPPNKMLRRSDSPENK	53
-0.419145	0.408762	-0.397508	0.58567	-0.446057	0.438907	-0.441945	0.787846	-0.203134	0.245176	-0.463545	0.201792	1	Q9BTA9	WW domain-containing adapter protein with coiled-coil	WAC	QQPVTADKQQGHEPVSPRSLQRSSSQRSPSP	511
-0.453544	0.45177	-0.677413	0.587369	-0.558248	0.551098	-0.659776	0.805683	-0.395167	0.423395	-0.499808	0.393825	0.999997	Q9BTA9	WW domain-containing adapter protein with coiled-coil	WAC	AGDPSPPNKMLRRSDSPENKYSDSTGHSKAK	64
0.000249714	-0.363232	0.18245	-0.0213631	0.56015	-0.425839	0.424374	-0.425622	0.134683	-1.16558	0.204614	-0.136024	0.999953	Q9BTD8	RNA-binding protein 42	RBM42	VGPVGFGPGDRSHLDSPEAREAMFLRRAAVA	135
-0.840569	-0.154216	0.88839	0.154775	-0.685878	0.240243	-0.148581	0.156745	-0.34263	0.468169	-0.306047	0.306047	0.999611	Q9BTE3	Mini-chromosome maintenance complex-binding protein	MCMBP	TWVKEAYVNANQARVSPSTSYTPSRHKRSYE	154
-0.0806422	0.0192394	-0.00798535	0.221676	-0.214144	-0.0797734	0.0783088	0.161864	-0.683081	0.36476	-0.361207	0.72081	0.999537	Q9BTU6	Phosphatidylinositol 4-kinase type 2-alpha	PI4K2A	PPVIVETARSHQRSSSESYTQSFQSRKPFFS	462
0.0421185	-0.0438926	-0.0670865	1.13997	-0.116117	0.108967	-0.644474	0.641191	-0.223993	0.618015	-0.169465	0.169465	0.983471	Q9BU76	Multiple myeloma tumor-associated protein 2	MMTAG2	AASARRKPRAEDQTESSCESHRKSKKEKKKK	177
-0.0450402	0.0432661	-0.191587	0.820128	-0.244714	0.200933	-0.202398	0.712054	-0.189485	0.0715442	-0.0679911	0.773555	1	Q9BUI4	DNA-directed RNA polymerase III subunit RPC3	POLR3C	LVPKLSLIGKGKRRRSSDEDAAGEPKAKRPK	204
-0.569255	0.523601	-0.512347	0.753868	-0.431891	0.424741	-0.434025	0.757357	-0.638575	0.287142	-0.251441	0.251441	0.999841	Q9BUQ8	Probable ATP-dependent RNA helicase DDX23	DDX23	__MAGELADKKDRDASPSKEERKRSRTPDRE	14
-1.36314	1.36136	-1.40013	1.85127	-0.958323	0.754208	-0.755673	1.38977	-1.28124	1.28345	-1.52929	1.61628	0.999996	Q9BUQ8	Probable ATP-dependent RNA helicase DDX23	DDX23	KDGHRRDKDRKRSSLSPGRGKDFKSRKDRDS	109
0.879368	-0.62886	0.640114	-1.24696	0.787123	-0.511959	0.510495	-0.879478	1.07607	-0.660215	0.663768	-1.05541	0.99296	Q9BV73	Centrosome-associated protein CEP250	CEP250	AAQAGSLEISKATASSPTQQDGRGQKNSDAK	2332
-1.04901	0.822871	-0.811617	2.07441	-0.839286	0.689587	-0.691052	2.13916	-0.743275	0.615599	-0.612046	2.05912	1	Q9BVJ6	U3 small nucleolar RNA-associated protein 14 homolog A	UTP14A	LRKRSELSQDAEPAGSQETKDSGSQEVLSEL	445
-0.260195	0.163421	-0.125559	0.117473	-0.202477	0.00205382	-0.00351843	0.306735	-0.142087	0.212204	-0.104419	0.104419	0.99966	Q9BVS4	Serine/threonine-protein kinase RIO2	RIOK2	SFSDGEVAEKAEVYGSENESERNCLEESEGC	350
1.85237	-1.85415	1.89498	-4.40617	1.60613	-1.59374	1.59228	-4.35476	1.50346	-1.50125	1.6887	-1.77315	0.999786	Q9BW19	Kinesin-like protein KIFC1	KIFC1	ELKRPLIKAPSQLPLSGSRLKRRPDQMEDGL	31
0.0328273	0.0719856	-0.0432458	-1.20882	0.125433	-0.0647436	0.063279	-0.892401	0.00891649	0.281395	-0.0111859	-0.0934643	1	Q9BW19	Kinesin-like protein KIFC1	KIFC1	__________MDPQRSPLLEVKGNIELKRPL	6
1.63827	-1.64005	1.74158	-2.03945	1.18453	-1.19168	1.22455	-2.31283	0.271314	-0.269103	0.468982	-0.836173	0.999997	Q9BWE0	Replication initiator 1	REPIN1	MGLAQPRLLSGPSQESPQTLGKESRGLRQQG	27
-0.743369	0.123164	-0.11191	0.56571	-0.343065	0.146519	-0.147983	0.992586	-0.403161	0.0574029	-0.0538499	0.73236	0.799017	Q9BWG6	Sodium channel modifier 1	SCNM1	PQAEESATVSAPAPMSPTRRRALDHYLTLRS	183
-0.32083	-0.0515361	0.0627902	0.118698	-0.0188798	-0.353208	0.63576	0.0213588	-0.0622679	-0.118332	0.362163	0.0609266	1	Q9BWH2	FUN14 domain-containing protein 2	FUNDC2	EKDMKKAKEQLKIRKSNQIPTEVRSKAEEVV	151
0.833543	-0.447109	0.458363	-0.741648	1.33262	-0.48983	0.488365	-1.31668	0.731725	-0.161769	0.165322	-0.547359	0.887212	Q9BWT3	Poly(A) polymerase gamma	PAPOLG	SRKKRLPSKELPDSSSPVPANNIRVIKNSIR	716
-0.445637	0.443863	-0.444263	0.43241	-0.469509	0.358567	-0.360032	0.634996	0.0314874	0.270799	-0.0337568	-0.0563224	0.985792	Q9BX63	Fanconi anemia group J protein	BRIP1	PKATPELGSSENSASSPPRFKTEKMESKTVL	1032
-0.728156	0.726382	-2.23529	1.2376	-0.610267	0.603117	-1.75345	1.30956	-0.445843	0.448055	-1.42392	1.12148	0.999801	Q9BX63	Fanconi anemia group J protein	BRIP1	PGHCSRCCCSTKQGNSQESSNTIKKDHTGKS	226
-0.495258	0.440026	-0.428772	0.688674	-0.608701	0.349223	-0.350687	0.765116	-0.345062	0.347274	-0.413791	0.629646	0.9755	Q9BX63	Fanconi anemia group J protein	BRIP1	EEAGKAEKIVISRSTSPTFNKQTKRVSWSSF	990
0.362794	0.833035	-0.373213	-0.589435	0.506899	1.21139	-0.838828	-0.50442	0.671222	0.911567	-0.673492	-0.910046	0.999935	Q9BX66	Sorbin and SH3 domain-containing protein 1	SORBS1	RASSSYRETPSSSPASPQETRQHESKPGLEP	89
-0.599208	0.440147	-0.428893	0.563415	-0.129267	0.122117	-0.281453	0.325543	-0.264221	0.266433	-0.289672	0.523206	0.999998	Q9BX95	Sphingosine-1-phosphate phosphatase 1	SGPP1	LGPASPRRAGALRRNSLTGEEGQLARVSNWP	112
1.7003	-1.59029	1.60154	-1.8491	1.43556	-1.32708	1.32561	-3.0705	1.57006	-1.38565	1.38921	-2.33024	0.997192	Q9BXB4	Oxysterol-binding protein-related protein 11	OSBPL11	TPNKNSSCGGGISSSSSSRGGSAKGWQYSDH	42
0.482816	0.102573	-0.0913184	-0.416625	0.339018	0.0753689	-0.0847603	-0.0824405	0.597978	-0.074449	0.0780021	-0.251294	0.999989	Q9BXB4	Oxysterol-binding protein-related protein 11	OSBPL11	PPLKSRSFSLASSSNSPISQRRPSQNAISFF	181
0.878081	-0.750715	0.761969	-1.31255	0.68483	-0.62436	0.622896	-0.981439	1.3908	-0.785436	0.788989	-1.73295	0.992429	Q9BXB5	Oxysterol-binding protein-related protein 10	OSBPL10	NSSSRSSSRATSAGSSPSCSLAGRGVSSRSA	30
1.09916	-1.10093	1.37937	-2.14542	1.08871	-1.09586	1.39629	-2.16917	0.999216	-0.997004	1.20483	-1.01034	0.982275	Q9BXB5	Oxysterol-binding protein-related protein 10	OSBPL10	MERAVQGTDGGGGSNSSSRSSSRATSAGSSP	16
-0.470048	0.834931	0.148678	-0.156764	-0.686073	0.606238	-0.01433	0.0224943	-0.0569918	0.810688	0.0547223	-0.665429	0.994457	Q9BXB5	Oxysterol-binding protein-related protein 10	OSBPL10	SSRSAAAGLGGGGSRSSPGSVAASPSGGGGR	56
0.230217	-0.231991	0.247422	-0.526273	0.0660061	-0.073156	0.117601	-0.204805	0.1927	-0.178283	0.181836	-0.380122	0.999988	Q9BXF6	Rab11 family-interacting protein 5	RAB11FIP5	RSSWLSTEGGRDSAQSPKLFTHKRTYSDEAN	296
-1.93925	2.25286	-1.52316	1.51507	-1.07591	1.58774	-1.21289	1.07839	-1.78975	1.91874	-1.22448	1.22448	0.893661	Q9BXK1	Krueppel-like factor 16	KLF16	APGGASPASSSSAASSPSSGRAPGAAPSAAA	109
0.941621	-1.0388	1.40479	-0.962735	0.364327	-0.371477	0.933235	-0.45196	0.514487	-0.733427	0.823764	-0.515828	1	Q9BXP5	Serrate RNA effector molecule homolog	SRRT	ICWNLQNIRLRECELSPGVNRDLTRRVRNIN	493
0.858062	-0.859836	1.1706	-2.3661	0.201831	-0.400685	0.604938	-0.199352	0.831691	-0.829479	1.21085	-1.02671	1	Q9BXS6	Nucleolar and spindle-associated protein 1	NUSAP1	EKQESQDLRATAKVPSPPDEHQEAENAVSSG	135
-0.523069	0.521294	-0.699826	0.670092	-0.84627	0.350497	-0.351962	0.612556	-0.580515	0.311682	-0.308129	0.384777	0.999997	Q9BXS9	Solute carrier family 26 member 6	SLC26A6	DAVTFALQHPRPVPDSPVSVTRL________	752
-0.267504	0.0988452	-0.0267351	0.0186499	-0.362647	0.0414571	-0.0429217	0.155278	-0.148653	-0.0304278	0.0339808	0.149039	0.99999	Q9BXW9	Fanconi anemia group D2 protein	FANCD2	EEIKSQNSQESTADESEDDMSSQASKSKATE	1412
0.00112006	-0.00289416	-0.0736074	0.194223	-0.985167	0.538199	-0.539664	0.867222	-0.43569	0.169048	-0.165495	0.572506	0.979303	Q9BY44	Eukaryotic translation initiation factor 2A;Eukaryotic translation initiation factor 2A, N-terminally processed	EIF2A	HEAKKAAKQEARSDKSPDLAPTPAPQSTPRN	506
0.790214	-0.547685	0.558939	-1.27	0.939365	-0.524839	0.523375	-1.07223	0.830981	-0.533319	0.536872	-0.894848	0.98521	Q9BY89	Uncharacterized protein KIAA1671	KIAA1671	VETQEVNPGASRDQTSPAVKQGSPVEPKATF	1012
0.860337	-0.410437	0.421691	-1.20731	0.66146	-0.301356	0.299892	-0.893821	0.337441	-0.485294	-0.0250811	0.0250811	0.990668	Q9BY89	Uncharacterized protein KIAA1671	KIAA1671	LVGQEVGSGEGPRTSSPLFNKAVFLRPSSST	128
-0.405068	0.409911	-0.561284	0.383954	-0.31605	0.20423	-0.205695	0.466952	-0.322516	0.473453	-0.520695	0.321175	1	Q9BYE7	Polycomb group RING finger protein 6	PCGF6	DMSHFSLRLEGGRQDSEDEEERLINLSELTP	115
0.991066	-0.99284	1.22097	-2.20398	1.15014	-1.15729	1.35349	-3.84118	1.13452	-1.13231	1.25755	-1.73312	0.955619	Q9BYJ9	YTH domain-containing family protein 1	YTHDF1	NAAFGQSGGAGSDSNSPGNVQPNSAPSVESH	350
-0.0850664	0.0832923	0.0776308	-0.254784	-0.160269	0.667366	0.168355	-0.248241	0.342341	-0.0581681	0.0617211	-0.199013	0.766256	Q9BYW2	Histone-lysine N-methyltransferase SETD2	SETD2	VVVVPKNSTLPMEETSPCSSRSSQSYRHYSD	1084
-0.334008	0.181875	-0.170621	0.593324	-0.300102	0.292952	-0.428335	0.594653	-0.260337	0.262549	-0.618853	0.601661	0.999994	Q9BYX2	TBC1 domain family member 2A	TBC1D2	ERRASRRRAVSEGCASEDEVEGEA_______	920
-0.434784	0.139073	-0.127819	0.464628	-1.11359	0.0279843	0.480568	-0.0350559	-1.11521	0.27186	-0.268307	0.492329	0.995024	Q9BZ23	Pantothenate kinase 2, mitochondrial	PANK2	AVGASAEGTRRDRLGSYSGPTSVSRQRVESL	189
-0.529651	0.602277	-0.604284	0.508537	-0.510189	0.503039	-0.570347	0.582831	-0.407713	0.409925	-0.620953	0.493633	0.845031	Q9BZZ5	Apoptosis inhibitor 5	API5	QKVEIGQKRASEDTTSGSPPKKSSAGPKRDA	462
-0.336299	0.334525	-0.417356	0.368798	-0.468989	0.461839	-0.508157	0.568878	-0.416474	0.320476	-0.272597	0.272597	0.998998	Q9BZZ5	Apoptosis inhibitor 5	API5	VEIGQKRASEDTTSGSPPKKSSAGPKRDARQ	464
-0.280133	0.256692	-0.245438	0.398624	-0.157383	0.150233	-0.154094	0.3523	-0.283648	0.28586	-0.312469	0.336869	0.999989	Q9C0B5	Palmitoyltransferase ZDHHC5	ZDHHC5	AAMPHSSSAKLSRGDSLKEPTSIAESSRHPS	380
-1.07054	1.43606	-1.31552	1.04942	-1.32122	1.25083	-1.0454	1.05357	-1.17946	1.45866	-1.11108	1.11108	0.799522	Q9C0B5	Palmitoyltransferase ZDHHC5	ZDHHC5	SLGSASPGPGQPPLSSPTRGGVKKVSGVGGT	694
-0.176941	0.175167	-0.18627	0.450979	-0.276956	0.197099	-0.198564	0.225661	-0.198466	0.340676	-0.589943	0.197125	1	Q9C0C2	182 kDa tankyrase-1-binding protein	TNKS1BP1	ETTQARTEAQDLCRASPEPPGPESSSRWLDD	672
0.73132	-0.535051	0.388485	-0.39657	1.00021	-0.656152	0.654687	-0.862721	1.18186	-0.857427	0.86098	-1.3381	1	Q9C0C2	182 kDa tankyrase-1-binding protein	TNKS1BP1	VKSKDLAEVGEGGGHSQARESGVGQTDWSGV	1248
-0.00584763	0.00407353	-0.210424	0.0561012	0.063798	-0.184647	0.132187	-0.061319	0.0123361	-0.0101244	-0.0397889	0.0518042	1	Q9C0C2	182 kDa tankyrase-1-binding protein	TNKS1BP1	SRDVSLGDWEFGKRDSLGAYASQDANEQGQD	893
1.10486	-0.734229	0.745483	-1.35452	0.531772	-0.502024	0.189989	-0.181824	1.09732	-0.753979	0.757532	-0.814629	0.999995	Q9C0C2	182 kDa tankyrase-1-binding protein	TNKS1BP1	PTSLVQRRFSEGVLQSPSQDQEKLGGSLAAL	435
0.0381306	0.0862166	-0.0485492	-0.64627	0.0604506	-0.0676005	0.135453	-0.328901	0.0954817	0.0980186	-0.0944655	-0.398006	1	Q9C0C2	182 kDa tankyrase-1-binding protein	TNKS1BP1	EILAKMEQPRKEVLASPDRLWGSRLTFNHDG	178
0.239746	-0.441244	0.297536	-0.260859	0.11943	-0.12658	0.196067	-0.124262	0.114682	-0.112471	0.18989	-0.573879	0.999993	Q9C0C2	182 kDa tankyrase-1-binding protein	TNKS1BP1	SQEADVQDWEFRKRDSQGTYSSRDAELQDQE	851
1.24174	-1.0638	1.07506	-1.2432	0.738974	-0.848059	0.774108	-0.736495	0.419507	-0.417295	0.628315	-1.4931	0.999331	Q9C0C2	182 kDa tankyrase-1-binding protein	TNKS1BP1	DQLGLRNLEVSSCVGSGGSSEARESAVGQMG	1178
0.337072	-0.543292	0.315694	-0.323779	0.768745	-0.772267	0.770803	-2.33696	1.19132	-0.584506	0.588059	-2.27712	0.999544	Q9C0C2	182 kDa tankyrase-1-binding protein	TNKS1BP1	TPDLGLRNMAPGAVCSPGESKELGVGQMDWG	1297
-0.636669	0.249866	-0.238612	0.631006	-0.737225	0.107631	-0.109095	0.625949	-0.865044	0.168613	-0.16506	0.524806	1	Q9C0C2	182 kDa tankyrase-1-binding protein	TNKS1BP1	LSPSALKAKLRPRNRSAEEGELAESKSSQKE	1666
1.6812	-0.988048	0.999302	-1.36243	1.6337	-0.829539	0.828074	-1.52841	1.52377	-0.768892	0.772445	-1.07215	0.960468	Q9C0C2	182 kDa tankyrase-1-binding protein	TNKS1BP1	PRNRSAEEGELAESKSSQKESAVQRSKSCKV	1677
0.374192	0.0495278	-0.0382737	-1.20166	0.264896	0.15976	-0.161225	-1.23015	0.341822	0.0322193	-0.0286662	-0.999727	0.998553	Q9C0C2	182 kDa tankyrase-1-binding protein	TNKS1BP1	QFGIIGNDRVSGAGFSPSSKMEGGHFVPPGK	1138
0.542945	-0.471825	0.483079	-0.721051	0.246161	-0.253311	0.446005	-0.377892	0.361835	-0.353492	0.357045	-0.836295	1	Q9C0C2	182 kDa tankyrase-1-binding protein	TNKS1BP1	AEERYESQEPLAGQESPLPLATREAALPILE	601
0.892905	-0.657007	0.668261	-1.39955	0.545386	-0.378882	0.325494	-0.31733	0.54245	-0.44393	0.447483	-0.971506	0.999912	Q9C0C7	Activating molecule in BECN1-regulated autophagy protein 1	AMBRA1	GQTPSSSRLELSSSASPQEERTVGVAFNQET	639
0.979825	-0.590389	0.601643	-0.70918	0.833111	-0.576758	0.575293	-0.804147	1.36594	-0.184491	0.188044	-0.403822	0.797386	Q9C0C9	E2/E3 hybrid ubiquitin-protein ligase UBE2O	UBE2O	KKVKRLLKKQVVRIMSCSPDTQCSRDHSMED	399
1.09673	-0.622308	0.633562	-0.702183	0.844382	-0.480344	0.475017	-0.466852	1.30787	-0.131184	0.134737	-0.25856	0.997067	Q9C0C9	E2/E3 hybrid ubiquitin-protein ligase UBE2O	UBE2O	VKRLLKKQVVRIMSCSPDTQCSRDHSMEDPD	401
0.45042	-0.584104	0.651858	-0.471533	-0.00873297	0.00158303	-0.0314602	0.139265	1.16309	-0.968386	0.971939	-1.35518	1	Q9C0C9	E2/E3 hybrid ubiquitin-protein ligase UBE2O	UBE2O	IAWECPEKNCAQGEGSMAKKVKRLLKKQVVR	381
1.62498	-0.93809	0.949344	-0.958604	1.26373	-0.724148	0.69139	-0.683225	0.0779796	-0.288274	0.0488331	-0.0488331	0.999985	Q9C0D5	Protein TANC1	TANC1	NGSMKVQISSQNPPPSPMPGRIAATPAGSRT	1564
0.368149	-0.369923	0.401006	-1.00439	0.315912	-0.323062	0.426944	-0.898722	0.122894	-0.120682	0.139027	-0.482031	0.999987	Q9C0E2	Exportin-4	XPO4	RLHGQLQRHQQQLLASPGSSTVDNKMLDDLY	521
1.27576	-1.27754	1.74451	-2.53983	1.12542	-1.13257	1.70157	-2.99083	1.09863	-1.09642	1.72949	-2.14542	1	Q9GZS1	DNA-directed RNA polymerase I subunit RPA49	POLR1E	SQRAVLVQFSNGKLQSPGNMRFTLYENKDST	35
-0.210799	0.112268	-0.101014	0.213387	-0.31069	0.217901	-0.219366	0.572037	0.205018	-0.202806	0.367622	-1.59598	0.995018	Q9GZT9	Egl nine homolog 1	EGLN1	____MANDSGGPGGPSPSERDRQYCELCGKM	12
-0.823294	0.635834	-0.62458	1.35782	-1.1948	1.18765	-1.5012	1.63322	-0.905351	0.804837	-0.801284	1.6072	1	Q9H063	Repressor of RNA polymerase III transcription MAF1 homolog	MAF1	SPPQTSGLSPSRLSKSQGGEEEGPLSDKCSR	75
0.694882	-0.424719	0.435973	-0.655829	0.732002	-0.739152	0.953622	-1.29042	0.222048	-0.470369	0.254895	-0.223389	0.999584	Q9H074	Polyadenylate-binding protein-interacting protein 1	PAIP1	PRTTPPPGAQCEVPASPQRPSRPGALPEQTR	77
1.27342	-0.784284	0.795538	-1.87046	1.17428	-0.636751	0.635287	-2.29717	1.32561	-0.81375	0.817303	-2.04234	0.99687	Q9H079	KATNB1-like protein 1	KATNBL1	TYLVNSSDSGSSQTESPSSKYSGFFSEVSQD	135
0.343807	-0.699664	-0.124469	0.116383	1.06868	-0.131137	0.129673	-0.183886	0.477433	-0.100744	0.104297	-0.27603	0.932029	Q9H0B6	Kinesin light chain 2	KLC2	QPGGTGLSDSRTLSSSSMDLSRRSSLVG___	610
0.373932	-0.219336	0.23059	-1.22113	0.42187	-0.273631	0.272166	-1.17148	0.281025	-0.103792	0.107345	-0.933477	0.99994	Q9H0D6	5'-3' exoribonuclease 2	XRN2	TPSGILTPHALGSRNSPGSQVASNPRQAAYE	448
-0.666429	0.465291	-0.454036	0.568553	-0.476543	0.469393	-0.519452	0.684837	-0.566941	0.418216	-0.411235	0.411235	0.927517	Q9H0G5	Nuclear speckle splicing regulatory protein 1	NSRP1	VGVQSSERNQDRKESSPNSRAKDKFLDQERS	457
1.17863	-1.18041	1.90566	-1.82904	0.763874	-0.748349	0.746885	-1.07711	0.639096	-0.636884	0.808219	-1.42284	0.954786	Q9H0H5	Rac GTPase-activating protein 1	RACGAP1	EEQKSALAFLNRGQPSSSNAGNKRLSTIDES	134
1.3358	-1.33758	1.70715	-1.95048	1.12864	-1.13579	1.6462	-1.39682	0.658756	-0.658181	1.09814	-0.660098	0.948048	Q9H0H5	Rac GTPase-activating protein 1	RACGAP1	EQKSALAFLNRGQPSSSNAGNKRLSTIDESG	135
0.40018	-0.344103	0.355357	-0.65716	0.319109	-0.326259	0.410605	-0.565498	0.342379	-0.340167	0.384203	-0.822395	0.985767	Q9H0L4	Cleavage stimulation factor subunit 2 tau variant	CSTF2T	IQGASKQGGSQPSSFSPGQSQVTPQDQEKAA	563
-0.479176	-0.137924	0.149178	0.651484	-0.565758	-0.221907	0.220443	0.736635	-0.923904	0.0621979	-0.0586448	0.675264	0.999111	Q9H1B7	Interferon regulatory factor 2-binding protein-like	IRF2BPL	SVAEVGVGAGGKRPGSVSSTDQERELKEKQR	334
-1.51412	1.51234	-1.77653	2.31598	-2.36517	0.541453	-0.542917	1.64322	-1.43824	1.44045	-1.51378	2.24158	0.999998	Q9H1E3	Nuclear ubiquitous casein and cyclin-dependent kinase substrate 1	NUCKS1	EKKMPKPRLKATVTPSPVKGKGKVGRPTASK	181
-0.597224	0.426578	-0.415324	0.670845	-0.105386	0.0982365	-0.191805	0.453338	-0.361576	0.363788	-0.439531	0.662668	1	Q9H1E3	Nuclear ubiquitous casein and cyclin-dependent kinase substrate 1	NUCKS1	PVRNRKVVDYSQFQESDDADEDYGRDSGPPT	19
-0.777999	0.776225	-0.777145	0.819671	-0.572751	0.565601	-0.822301	0.797957	-0.370067	0.372279	-0.479038	0.513785	0.999895	Q9H1E3	Nuclear ubiquitous casein and cyclin-dependent kinase substrate 1	NUCKS1	EAKNKRRSGKNSQEDSEDSEDKDVKTKKDDS	58
1.26659	-0.277339	0.288593	-0.676847	0.832091	-0.0872036	0.085739	-0.167074	0.982278	-0.54937	0.0783027	-0.0783027	1	Q9H1E3	Nuclear ubiquitous casein and cyclin-dependent kinase substrate 1	NUCKS1	KTSTSPPPEKSGDEGSEDEAPSGED______	234
0.332633	-0.313804	0.325058	-0.636061	1.13342	-1.06916	1.0677	-2.58684	1.27262	-1.20905	1.2126	-2.39678	0.993815	Q9H1H9	Kinesin-like protein KIF13A	KIF13A	IIVVPLKENSALAKGSPSSQSIPEKNSKSLC	1679
0.0401838	-0.0025631	0.0138172	-0.189893	0.0309642	0.106314	-0.0228782	-0.703166	0.297897	-0.170126	0.17368	-0.678317	0.944542	Q9H211	DNA replication factor Cdt1	CDT1	PSPARPALRAPASATSGSRKRARPPAAPGRD	45
-0.0950498	0.00717266	0.00408143	0.177645	0.673499	-0.596263	0.594799	-0.949343	1.26558	-1.17721	1.18077	-1.99671	1	Q9H2D6	TRIO and F-actin-binding protein	TRIOBP	RLAKQEELERDLAQRSEERRKWFEATDSRTP	1983
0.636523	-1.19309	0.495739	-0.503825	1.08484	-0.665314	0.417384	-0.40922	0.361661	-0.639392	0.472708	-0.363003	0.99928	Q9H2G2	STE20-like serine/threonine-protein kinase	SLK	NLSISSFLSKTKDSGSISLQETRRQKKTLKK	779
-0.265426	0.263652	-0.648377	0.334144	-0.317781	0.310631	-0.80562	0.348387	-0.183349	0.455221	-0.668421	0.182008	0.999998	Q9H2G2	STE20-like serine/threonine-protein kinase	SLK	DVAQKVDEDSAEDTQSNDGKEVVEVGQKLIN	571
-1.25682	0.592949	-0.581695	1.34328	-1.26902	0.314775	-0.316239	1.09365	-0.87747	0.337021	-0.333468	0.792191	0.999856	Q9H2H9	Sodium-coupled neutral amino acid transporter 1	SLC38A1	GQINSKFISDRESRRSLTNSHLEKKKCDEYI	52
1.55079	-1.55256	1.6664	-2.60396	1.45012	-1.42291	1.42145	-2.17119	0.739993	-0.737781	0.819007	-0.935261	0.999999	Q9H2M9	Rab3 GTPase-activating protein non-catalytic subunit	RAB3GAP2	TVEDLHERVPEKADFSPFGNSQGPSRVAQFL	450
1.40797	-1.40975	1.52032	-1.57266	0.802787	-0.697239	0.695775	-0.724139	1.12088	-1.11866	1.19972	-1.72708	1	Q9H2P0	Activity-dependent neuroprotector homeobox protein	ADNP	SKFFSAYKSHFRNVHSEDFENRILLNCPYCT	98
0.0791247	0.54413	-0.0895432	-0.992608	-0.246293	0.220319	-0.0584404	0.0666047	0.0744692	0.370486	-0.0767387	-0.492073	0.997831	Q9H2Y7	Zinc finger protein 106	ZNF106	SEEGTGKENEPQQMVSPSNSLRAGQSQKATM	893
-0.287527	0.287016	-0.492853	0.266414	-0.453974	0.309624	-0.311088	0.500446	-0.420571	0.457591	-0.424443	0.419229	0.995802	Q9H2Y7	Zinc finger protein 106	ZNF106	LKFSVEQRNTRNRENSPSSQSAGLSSINKEG	1279
-0.0192648	-0.60171	0.129824	-0.00184862	0.0740417	-0.302342	-0.0659557	0.162649	0.0680201	-0.23997	0.136054	-0.0693614	0.995434	Q9H307	Pinin	PNN	DRKHRRSVDRKRRDTSGLERSHKSSKGGSSR	658
-0.423328	0.421553	-0.597771	0.815329	-0.276259	0.269109	-0.722387	0.740911	-0.409031	0.411243	-0.480289	0.500885	1	Q9H307	Pinin	PNN	RLGGERRTRRESRQESDPEDDDVKKPALQSS	100
-0.117859	0.116085	-0.410073	0.772959	-0.790433	0.154779	-0.156244	0.932467	-1.15	0.275564	-0.272011	0.961155	0.993701	Q9H307	Pinin	PNN	GGGRGRGSLLLRRGFSDSGGGPPAKQRDLEG	66
-1.03021	0.77524	-0.571926	0.563841	-1.08379	0.715979	-0.717443	1.11779	-0.614094	0.462321	-0.458768	0.636973	0.9849	Q9H307	Pinin	PNN	GSKDKNSRSDRKRSISESSRSGKRSSRSERD	692
0.0632825	0.0931272	-0.073701	-0.974117	0.151421	0.155113	-0.285908	-0.148942	0.157751	0.117266	-0.113713	-0.150301	1	Q9H3H1	tRNA dimethylallyltransferase, mitochondrial	TRIT1	QSVSPDHNKEPKEKGSPGQNDQELKCSV___	455
-0.554299	0.445187	-0.433933	0.742356	-0.652838	0.645688	-0.67869	1.02856	-0.47349	0.475702	-0.543573	0.638079	1	Q9H3N1	Thioredoxin-related transmembrane protein 1	TMX1	LKKVEEEQEADEEDVSEEEAESKEGTNKDFP	247
0.113482	-0.41112	0.104241	-0.112327	0.265448	-0.566907	0.221563	-0.213399	0.136523	-0.275341	-0.000490025	0.000490025	1	Q9H3Q1	Cdc42 effector protein 4	CDC42EP4	DTSFLNSKAGEPDGESLDEQPSSSSSKRSLL	64
0.681136	-0.526372	0.268555	-0.276641	1.24688	-0.0989788	0.0975142	-1.0432	0.432084	0.210703	-0.20715	-0.213805	1	Q9H3Q1	Cdc42 effector protein 4	CDC42EP4	LGSLRDSALFVKNAMSLPQLNEKEAAEKGTS	118
-0.247706	0.420633	-0.397841	0.226593	-0.286209	0.34974	-0.560675	0.288688	-0.132684	0.303442	-0.484178	0.131343	0.998539	Q9H4A3	Serine/threonine-protein kinase WNK1	WNK1	SLVGSKEEPPPARSGSGGGSAKEPQEERSQQ	185
-1.40298	1.08432	-1.07307	1.70023	-0.590152	0.583002	-0.662569	0.603724	-1.22968	1.30654	-0.965868	0.965868	0.964327	Q9H4A3	Serine/threonine-protein kinase WNK1	WNK1	RRPTKSKGSKSSRSSSLGNKSPQLSGNLSGQ	2140
0.526872	-0.528646	0.861186	-1.7785	0.44173	-0.44888	0.760518	-1.80095	0.507349	-0.505138	0.842267	-1.80402	1	Q9H4G0	Band 4.1-like protein 1	EPB41L1	GTPEKANERAGLREGSEEKVKPPRPRAPESD	564
-0.176313	0.715952	-0.401531	0.155199	-0.671606	0.110297	-0.111761	0.582018	0.0107399	0.348147	-0.304844	-0.0120812	0.996954	Q9H4G0	Band 4.1-like protein 1	EPB41L1	GSEEKVKPPRPRAPESDTGDEDQDQERDTVF	578
-0.434528	1.90541	-0.462487	0.413415	-0.535935	1.77158	-0.536562	0.538414	-0.343897	1.35881	-0.336969	0.336969	0.999816	Q9H4H8	Protein FAM83D	FAM83D	DENILFPRGTQSTEGSPVSKMSVSRSSSLKS	462
-0.0604275	0.139869	-0.164148	0.039314	-0.0211627	0.0140128	-0.17948	0.0723052	0.113945	0.0560563	-0.0525032	-0.3436	0.806781	Q9H4I2	Zinc fingers and homeoboxes protein 3	ZHX3	EPRVPEASSEPFDTSSPQAGRQLETD_____	946
1.9726	-1.91608	1.92733	-2.98664	1.19709	-1.13296	1.1315	-1.42775	1.50444	-1.77687	1.39452	-1.39452	0.998995	Q9H4L4	Sentrin-specific protease 3	SENP3	KPRLKSGGGFGPDPGSGTTVPARRLPVPRPS	54
0.390203	-0.631121	0.407496	-0.411317	-0.518139	0.456785	-0.45825	0.723351	-0.21535	0.0373295	-0.0337764	0.287303	0.999999	Q9H4Z3	Phosphorylated CTD-interacting factor 1	PCIF1	VETPPAENKPRKRQLSEEQPSGNGVKKPKIE	116
-0.626339	0.646097	-0.685477	0.605225	-0.52576	0.51861	-0.564515	0.871267	-0.495332	0.497543	-0.531973	0.514247	0.999881	Q9H501	ESF1 homolog	ESF1	KKMKTSCKFKIDSNISPKKDSKEFTQKNKKE	153
0.242515	-2.03634	0.860924	-0.263628	0.862478	-0.869628	1.60322	-1.04459	0.634293	-1.19047	1.47786	-0.635634	0.999999	Q9H6E5	Speckle targeted PIP5K1A-regulated poly(A) polymerase	TUT1	EALGCHIEQATKRTRSEGGGTGESSQGGTSK	644
-0.415344	0.420783	-0.311231	0.303145	-0.00171243	-0.0054375	-0.277595	0.355104	-0.440299	0.44251	-0.777028	0.498859	0.999989	Q9H6F5	Coiled-coil domain-containing protein 86	CCDC86	LVEFESNPEETREPGSPPSVQRAGLGSPERP	47
-0.693691	0.483098	-0.471844	0.776788	-0.8077	0.655542	-0.657007	0.975304	-0.709553	0.606968	-0.603415	0.807615	0.999714	Q9H6F5	Coiled-coil domain-containing protein 86	CCDC86	TPLRRSRRLGGLRPESPESLTSVSRTRRALV	18
-0.838954	0.83718	-0.889479	2.02795	-0.158522	0.151372	-0.406891	1.52434	-1.28185	1.25874	-1.25519	3.241	1	Q9H6F5	Coiled-coil domain-containing protein 86	CCDC86	AGLESPQGQPEPGAASPQRQQDLHLESPQRQ	91
-1.69898	1.35321	-1.34196	3.08896	-1.05428	0.605846	-0.60731	2.36792	-1.96989	1.56307	-1.55952	3.24224	1	Q9H6F5	Coiled-coil domain-containing protein 86	CCDC86	LHLESPQRQPEYSPESPRCQPKPSEEAPKCS	113
0.177236	-0.17901	0.798388	-0.568111	0.0704424	-0.0775924	0.510149	-0.148506	0.180558	-0.379623	0.702978	-0.1819	0.965885	Q9H6R4	Nucleolar protein 6	NOL6	LPTKNNVRSAWYRGQSPAGDGSPEPPTPRYN	283
0.155326	-0.247488	0.0260793	-0.0341645	-0.0616296	0.0544797	0.894655	-0.649557	0.0492688	-0.0470571	0.455983	-0.830343	0.999714	Q9H6R4	Nucleolar protein 6	NOL6	VRSAWYRGQSPAGDGSPEPPTPRYNTWVLQD	289
1.16311	-1.16488	1.19328	-3.41286	0.913611	-0.920761	1.01271	-2.65325	0.970394	-0.809028	0.812582	-1.65917	1	Q9H6S0	Probable ATP-dependent RNA helicase YTHDC2	YTHDC2	SPRQPAPGGGGGGGPSPCGPGGGGRAKGLKD	23
0.169772	0.0873814	-0.0761273	-0.742027	0.239839	0.118463	-0.119927	-0.752415	0.178256	0.196257	-0.180525	-0.575916	1	Q9H6S3	Epidermal growth factor receptor kinase substrate 8-like protein 2	EPS8L2	PQGPAPIPFQHRGGDSPEAKNRVGPQVPLSE	217
-0.403523	0.401749	-0.655367	0.472221	-0.462533	0.455383	-0.56526	0.555097	-0.448882	0.531326	-0.548577	0.44754	0.999508	Q9H6Y2	WD repeat-containing protein 55	WDR55	__MDRTCEERPAEDGSDEEDPDSMEAPTRIR	14
-0.268381	-0.284159	0.257963	0.774497	-0.147178	0.140028	-0.160976	0.372894	-0.406351	-0.0150878	0.0186409	0.670052	0.991487	Q9H6Z4	Ran-binding protein 3	RANBP3	EDGNYCPPVKRERTSSLTQFPPSQSEERSSG	126
0.840261	-0.54967	0.560924	-0.72059	0.409933	-0.417083	0.759438	-1.4603	0.522477	-0.520266	0.585619	-0.538779	0.999996	Q9H7D0	Dedicator of cytokinesis protein 5	DOCK5	REAKAPPPPPPKARKSGIPTSEPGSQ_____	1860
-0.222664	-0.490241	0.623872	0.20155	-0.21068	-0.270979	0.403675	0.213159	-0.303803	-0.128934	0.263397	0.133415	0.999938	Q9H7N4	Splicing factor, arginine/serine-rich 19	SCAF1	TKGKTKPSKTRKKVRSGGGSGGSGGQVSLKK	929
-0.507739	0.505965	-0.727389	0.602471	-0.432469	0.425319	-0.604327	0.648958	-0.455731	0.457942	-0.542427	0.683017	1	Q9H8G2	Caspase activity and apoptosis inhibitor 1	CAAP1	EKKILKILEGDNGMDSDMEEEADDGSKMGSD	203
0.482471	-0.471917	0.483171	-1.02698	0.451571	-0.39193	0.390465	-0.954171	0.565866	-0.563655	0.669016	-0.620523	0.993957	Q9H8G2	Caspase activity and apoptosis inhibitor 1	CAAP1	WGGSSVERSERRKRRSTDSSSVSGSLQQETK	89
0.718002	-0.61977	0.631024	-0.956502	0.409821	-0.416971	0.508713	-0.708548	0.131668	-0.129456	0.279981	-0.263413	0.999606	Q9H8Y5	Ankyrin repeat and zinc finger domain-containing protein 1	ANKZF1	GTAQGLRDARGGPSHSAGANLRRYNEATLYK	258
-0.553008	0.570669	-0.511849	0.503764	-0.636829	0.564624	-0.517553	0.525718	-0.425052	0.545841	-0.688891	0.423711	1	Q9H8Y5	Ankyrin repeat and zinc finger domain-containing protein 1	ANKZF1	ARAPRTSCSGSGERESPERKLLQGPMDISEK	56
1.06207	-0.848897	0.860151	-1.20725	0.715933	-0.320132	0.318667	-0.84603	0.24099	-0.812532	-0.0541074	0.0541074	1	Q9H8Y8	Golgi reassembly-stacking protein 2	GORASP2	SEKPVSAAVDANASESP______________	451
1.04644	-1.04821	1.095	-1.69714	0.781438	-0.788588	1.03835	-1.06844	1.08383	-1.08162	1.11729	-1.39055	0.999998	Q9H910	Hematological and neurological expressed 1-like protein	HN1L	RAMKPPGGESSNLFGSPEEATPSSRPNRMAS	30
1.84664	-1.84576	1.85701	-2.85339	1.53659	-1.45087	1.4494	-2.26381	1.22475	-1.22253	1.27935	-1.5786	1	Q9H910	Hematological and neurological expressed 1-like protein	HN1L	AARSIPAGAEPGEKGSARKAGPAKEQEPMPT	144
1.02729	-0.88437	0.895624	-1.34854	1.32834	-1.33549	1.34105	-4.65014	1.34442	-1.30254	1.30609	-2.65303	0.994403	Q9H910	Hematological and neurological expressed 1-like protein	HN1L	QHLNPPGGKTSDIFGSPVTATSRLAHPNKPK	97
0.0922174	-0.0939915	0.252643	-0.186207	-0.0641939	-0.0170623	0.0645899	0.00999064	-0.13201	0.134221	0.170054	-0.208745	0.99999	Q9H9E3	Conserved oligomeric Golgi complex subunit 4	COG4	__________MADLDSPPKLSGVQQPSEGVG	6
-0.194136	0.392182	-0.211695	0.173023	0.0362576	0.0179505	-0.0194151	-0.281838	0.190454	0.366062	-0.214119	-0.191795	0.999105	Q9HAN9	Nicotinamide/nicotinic acid mononucleotide adenylyltransferase 1	NMNAT1	HQEKLEASDCDHQQNSPTLERPGRKRKWTET	117
2.04031	-1.63271	1.64396	-2.94094	1.52011	-1.00008	0.998617	-1.84528	1.35219	-1.03071	1.03426	-2.57342	0.999995	Q9HAP2	MLX-interacting protein	MLXIP	QDPLGKGEQVPLHGGSPQVTVTGPSRDCPNS	669
0.25965	-0.574547	0.630325	-0.280763	0.790496	-0.797646	1.56783	-1.48882	0.448729	-0.513882	1.02208	-0.450071	0.952532	Q9HC35	Echinoderm microtubule-associated protein-like 4	EML4	KEQAKATLLEDQQDPSPSS____________	978
0.447758	-0.134757	0.146011	-0.597913	0.482756	-0.277215	0.27575	-0.844178	0.944336	-0.48556	0.489113	-1.16046	0.999998	Q9HC35	Echinoderm microtubule-associated protein-like 4	EML4	QGQREKKEESHSNDQSPQIRASPSPQPSSQP	138
0.237849	-0.624234	0.131	-0.139085	0.341181	-0.348331	0.52872	-0.619397	0.271659	-0.269447	0.555042	-0.453724	0.999985	Q9HC52	Chromobox protein homolog 8	CBX8	RSDSARGIRIPYPGRSPQDLASTSRAREGLR	110
0.552559	-0.554333	0.73394	-1.22538	0.438347	-0.445497	0.582419	-0.689982	0.783564	-0.685098	0.688651	-1.63839	0.999591	Q9HC52	Chromobox protein homolog 8	CBX8	ASTSRAREGLRNMGLSPPASSTSTSSTCRAE	130
0.287601	-0.289375	0.480838	-0.484709	0.593586	-0.600736	0.605662	-1.39154	0.0121713	-0.55836	-0.0144408	0.146061	0.959257	Q9HC52	Chromobox protein homolog 8	CBX8	LARRQDSDLVQCGVTSPSSAEATGKLAVDTF	265
-0.975906	0.747633	-0.736378	0.827487	-0.73321	0.72606	-0.970188	1.04154	-0.873877	0.720104	-0.716551	0.907053	0.992806	Q9HC52	Chromobox protein homolog 8	CBX8	RERERGTSRVDDKPSSPGDSSKKRGPKPRKE	191
-0.440927	0.172158	-0.160904	0.543513	-0.841369	0.716499	-0.717963	0.890816	-0.833493	-0.149735	0.153288	0.34439	0.988938	Q9HCD5	Nuclear receptor coactivator 5	NCOA5	_______MNTAPSRPSPTRRDPYGFGDSRDS	9
-0.238965	0.722734	-0.120944	0.112859	-0.201994	0.665286	-0.206489	0.204473	-0.116161	0.525037	-0.207421	0.11482	0.999986	Q9HCD6	Protein TANC2	TANC2	GSHQVFDFRSSSSVGSPTRQTYQSTSPALSP	1476
-0.387801	0.361158	-0.349904	0.619911	-0.488141	0.408	-0.409464	0.803288	-0.582624	0.353738	-0.350185	0.635457	0.999998	Q9HCG8	Pre-mRNA-splicing factor CWC22 homolog	CWC22	NKHGDPKKKRGERRNSFSENEKHTHRIKDSE	829
-0.494138	0.388147	-0.376893	0.734567	-0.505665	0.311436	-0.3129	0.846951	-0.635089	0.373247	-0.369694	0.574557	0.999887	Q9HCN4	GPN-loop GTPase 1	GPN1	ILTRGTLDEEDEEADSDTDDIDHRVTEESHE	338
-0.634103	0.240144	-0.22889	0.838668	-0.767205	0.17603	-0.177495	0.759806	-0.602718	0.295913	-0.29236	0.885441	0.999983	Q9HCS5	Band 4.1-like protein 4A	EPB41L4A	APSPVKSFKKAKNENSPDTQRSKSHAPWEEN	402
0.549626	-0.328238	0.339492	-0.409188	0.849432	-0.716818	0.715353	-0.80281	0.981834	-0.955555	0.765604	-0.765604	1	Q9HD15	Steroid receptor RNA activator 1	SRA1	RRSLLTKRVAAPQDGSPRVPASETSPGPPPM	48
1.65623	-1.39075	1.33569	-1.34377	0.921734	-0.491635	0.49017	-1.48997	0.868116	-0.865904	0.877109	-1.35755	0.999998	Q9NP64	Nucleolar protein of 40 kDa	ZCCHC17	DPNNVIIEQEERRRRSFQDYTGQKITLEAVL	114
1.4584	-1.46018	1.87636	-2.4354	0.619288	-0.723978	1.09635	-0.616809	0.199308	-0.561682	0.687205	-0.200649	0.982512	Q9NPD8	Ubiquitin-conjugating enzyme E2 T	UBE2T	MLDNLPEAGDSRVHNSTQKRKASQLVGIEKK	177
0.692145	-0.820935	0.163	-0.171086	0.426995	-0.614821	0.454731	-0.424516	0.0993321	-0.271517	0.291936	-0.100673	0.961188	Q9NQ29	Putative RNA-binding protein Luc7-like 1	LUC7L	SGRSERGPPDWRLESSNGKMASRRSEEKEAG	354
-0.182367	0.180593	-0.858638	0.615072	-0.408223	0.401073	-0.651542	0.546167	-0.249873	0.252084	-0.32781	0.490274	1	Q9NQ55	Suppressor of SWI4 1 homolog	PPAN	RKKSLEGMKKARVGGSDEEASGIPSRTASLE	359
1.15209	-1.15387	1.20664	-2.12867	1.01779	-1.02494	1.13339	-2.24775	1.40634	-1.14512	1.14867	-2.11166	0.999319	Q9NQA3	WAS protein family homolog 6	WASH6P	PVGQGARQDDGSSSASPSVQGAPREVVDPSG	327
-0.550179	0.574003	-0.893487	0.529066	-0.831794	0.743675	-0.74514	0.940074	-0.494448	0.52389	-0.792161	0.493107	0.996384	Q9NQC3	Reticulon-4	RTN4	_MEDLDQSPLVSSSDSPPRPQPAFKYQFVRE	15
0.522862	-0.47959	0.490844	-1.67292	1.2124	-1.0653	1.06383	-2.32297	1.11968	-0.918552	0.922105	-2.12642	1	Q9NQS1	Cell death regulator Aven	AVEN	SVAAGCPVLLGKDNPSPGPSRDSQKPTSPLQ	261
1.17817	-1.05641	1.04794	-1.05602	0.975985	-0.697433	0.695968	-0.964328	0.458028	-0.54997	0.665069	-0.459369	1	Q9NQS7	Inner centromere protein	INCENP	EAKTDQADGPREPPQSARRKRSYKQAVSELD	446
-1.68837	2.49257	-1.53717	1.52909	-0.852901	1.58717	-0.904255	0.85538	-1.52814	2.35141	-1.35715	1.35715	1	Q9NQS7	Inner centromere protein	INCENP	VGTGRSASKLRIAQVSPGPRDSPAFPDSPWR	263
-0.887971	2.46126	-0.544523	0.536438	-0.91141	1.62693	-0.862837	0.871001	-0.10756	1.82788	-0.0298759	0.0298759	0.916799	Q9NQS7	Inner centromere protein	INCENP	TEIANSTPNPKPAASSPETPSAGQQEAKTDQ	421
-0.27054	0.459059	-0.621984	0.249426	-0.387527	0.688564	-0.657308	0.390005	-0.0954307	0.703861	-0.392611	0.0940894	0.987121	Q9NQS7	Inner centromere protein	INCENP	LEDEELQPPRSKTPSSPCPASKVVRPLRTFL	481
0.265909	-0.0150929	-0.226097	0.015652	0.941512	0.0293632	-0.223695	-0.0364348	0.82941	0.0887362	-0.0851831	-0.41616	1	Q9NQW6	Actin-binding protein anillin	ANLN	RARQPLSEASNQQPLSGGEEKSCTKPSPSKK	54
0.171819	-0.0104104	0.0216644	-0.065615	-0.25205	0.2449	-0.268609	0.274703	-0.126196	0.128408	-0.222077	0.319913	0.977566	Q9NQW6	Actin-binding protein anillin	ANLN	LNKLKNEGPQRKNKASPQSEFMPSKGSVTLS	792
0.940657	-0.820901	0.832155	-1.70909	0.644903	-0.851731	0.557306	-0.549142	0.259889	-0.959608	0.000127301	-0.000127301	0.999634	Q9NQW6	Actin-binding protein anillin	ANLN	EEKSCTKPSPSKKRCSDNTEVEVSNLENKQP	72
1.45235	-1.37576	1.33078	-1.33886	2.19718	-1.84286	1.84139	-4.16633	1.35557	-0.901534	0.905087	-1.29552	0.999677	Q9NQW6	Actin-binding protein anillin	ANLN	TVPSKGELSREICLQSQSKDKSTTPGGTGIK	356
1.98985	-1.7819	1.79315	-2.87719	2.08281	-1.7132	1.71173	-2.89766	0.740055	-0.852127	0.649176	-0.649176	0.983151	Q9NQW6	Actin-binding protein anillin	ANLN	GMRRGLNSRLEATAASSVKTRMQKLAEQRRR	140
1.64531	-1.56719	1.57844	-3.42028	0.927081	-0.866615	0.865151	-1.11707	1.50541	-1.37558	1.37913	-2.5416	0.976785	Q9NQW6	Actin-binding protein anillin	ANLN	VTEKVTENQIPAKNSSTEPKGFTECEMTKSS	503
-0.769229	-0.0580761	0.0693302	0.295573	-0.501851	-0.0135428	0.764494	0.00647122	-0.424895	0.0770826	0.0806423	-0.0726014	0.999998	Q9NQW6	Actin-binding protein anillin	ANLN	CSWEDDVNHSFAKQNSVQEQPGTACLSKFSS	225
0.0555263	-0.355061	0.590134	-0.0766397	0.21203	-0.21918	0.685295	-1.24946	-0.0784582	0.08067	0.56672	-0.687846	0.984029	Q9NQW6	Actin-binding protein anillin	ANLN	QSTPLKKHQGVSKTQSLPVTEKVTENQIPAK	485
0.388166	-0.0579266	0.0691806	-1.22358	0.329147	0.0209909	-0.0224555	-1.29287	0.39263	-0.0203477	0.0239007	-0.846721	0.985967	Q9NR19	Acetyl-coenzyme A synthetase, cytoplasmic	ACSS2	HLGRAELGMGDSTSQSPPIKRSCPDVQISWN	267
0.0112947	0.721501	-0.0217132	-0.062617	-0.324177	0.374423	-0.162381	0.170545	-0.0588084	0.356856	-0.0394385	0.0394385	1	Q9NR30	Nucleolar RNA helicase 2	DDX21	KQVKKKAEPSEVDMNSPKSKKAKKKEEPSQN	71
-0.320498	0.550984	-0.153881	0.145796	-0.0972244	0.397742	0.10531	-0.127243	-0.0336814	0.502869	0.0314119	-0.158532	1	Q9NR30	Nucleolar RNA helicase 2	DDX21	SKKAKKKEEPSQNDISPKTKSLRKKKEPIEK	89
-0.584233	0.865465	-0.400138	0.392053	-1.36471	0.0933423	-0.0948069	0.823944	-0.385607	0.336469	-0.332916	0.86669	1	Q9NRG0	Chromatin accessibility complex protein 1	CHRAC1	EEKREEDEENDNDNESDHDEADS________	124
-0.453156	0.132705	-0.121451	0.360217	-0.408072	0.400922	-0.415194	0.936419	-0.399822	0.402034	-0.577425	0.623566	0.931721	Q9NRH2	SNF-related serine/threonine-protein kinase	SNRK	LDKDSGFTYSWHRRDSSEGPPGSEGDGGGQS	569
-0.0208931	0.299227	-0.193981	-0.000220336	0.0461045	0.241021	-0.163828	-0.0436255	0.02762	0.290427	-0.192525	-0.0289613	0.993186	Q9NRH2	SNF-related serine/threonine-protein kinase	SNRK	ILREKQEKEIQTRSASPSNIKAQFRQSWPTK	351
1.84599	-1.57264	1.58389	-2.74105	1.26541	-1.02022	1.01876	-1.85107	1.22388	-1.03288	1.03644	-1.47158	0.762108	Q9NRL2	Bromodomain adjacent to zinc finger domain protein 1A	BAZ1A	DKPQPDSKPTYSRGRSSNAYDPSQMCAEKQL	960
1.5505	-1.37935	1.3906	-2.64225	1.19548	-0.944475	0.943011	-1.60747	1.21956	-0.95376	0.957313	-2.29491	0.958008	Q9NRL2	Bromodomain adjacent to zinc finger domain protein 1A	BAZ1A	KPQPDSKPTYSRGRSSNAYDPSQMCAEKQLE	961
1.41036	-1.01959	1.03085	-1.42032	1.3904	-0.99402	0.992555	-2.33344	1.5613	-1.10784	1.11139	-2.71666	0.96422	Q9NRL2	Bromodomain adjacent to zinc finger domain protein 1A	BAZ1A	QSRSVNIASKLSLQESESKRRCRKRQSPEPS	1402
0.445166	-0.44694	0.524366	-0.896675	0.441917	-0.449067	0.563527	-0.712975	0.0671892	-0.0649774	0.387228	-0.42198	1	Q9NRX4	14 kDa phosphohistidine phosphatase	PHPT1	GVFKYVLIRVHSAPRSGAPAAESKEIVRGYK	33
-0.328659	0.0122963	0.0829018	-0.0117371	0.149938	-0.590607	0.596856	-0.147459	-1.03663	-0.211243	0.308374	0.215724	0.998118	Q9NRY4	Rho GTPase-activating protein 35	ARHGAP35	ISSRFIRPSDRNQKNSLSDPNIDRINLVILG	589
0.418997	-0.219814	0.231068	-1.20678	0.298666	-0.14152	0.140055	-0.357902	0.424731	-0.259369	0.262922	-1.40433	1	Q9NS37	CREB/ATF bZIP transcription factor	CREBZF	SSSSDSGSAEKRRRKSPGGGGGGGSGNDNNQ	189
-0.520172	0.23811	-0.226856	0.518346	-0.616919	0.345913	-0.347378	0.68193	-0.549338	0.38402	-0.380466	0.65056	1	Q9NS91	E3 ubiquitin-protein ligase RAD18	RAD18	AWEASHKNDLQDTEISPRQNRRTRAAESAEI	471
-0.979861	0.0230603	-0.0118062	1.36423	-0.7329	-0.0115605	0.0100959	1.39048	-0.0406447	-0.0287468	0.0322999	0.710447	0.999796	Q9NSC5	Homer protein homolog 3	HOMER3	VSANGPGEEKLFRSQSADAPGPTERERLKKM	159
-0.14488	-1.1202	0.134461	2.73281	-0.576236	0.362388	-0.363852	0.431765	-0.571662	0.611838	-0.196088	0.196088	0.996717	Q9NSI6	Bromodomain and WD repeat-containing protein 1	BRWD1	KRLKSQTKIIPELVGSPTQSTSSRTAYLGTH	1475
1.35428	-1.31485	1.32611	-2.22725	0.683584	-0.690734	0.795834	-1.27703	0.510857	-0.508645	0.523091	-0.684741	1	Q9NSI6	Bromodomain and WD repeat-containing protein 1	BRWD1	LSLDIQSPPNIGLRRSGQVEGVRQMHQNAPR	710
0.356729	-0.358503	0.678627	-0.457227	0.101998	-0.67808	0.605549	-0.0995191	0.516458	-0.514246	1.00074	-0.55315	0.972873	Q9NSK0	Kinesin light chain 4	KLC4	TKVAELLGESDGRRTSQEGPGDSVKFEGGED	519
1.11991	-1.07949	1.09075	-1.38216	0.924223	-0.931373	0.950095	-1.47037	0.625856	-0.694176	0.587334	-0.587334	0.976809	Q9NSU2	Three-prime repair exonuclease 1	TREX1	SAVTTTAHLATTRNTSPSLGESRGTKDLPPV	261
0.227963	0.0195378	-0.0251367	-0.0189787	0.0373737	-0.0401273	-0.10057	0.0330557	0.0987002	-0.220355	-0.0297574	0.0297574	0.981667	Q9NSY1	BMP-2-inducible protein kinase	BMP2K	__MKKFSRMPKSEGGSGGGAAGGGAGGAGAG	14
-3.01665	0.925306	-0.914052	0.933633	-1.23593	0.573588	-0.575053	1.1109	-1.48536	0.620682	-0.617129	0.79941	0.998999	Q9NTI5	Sister chromatid cohesion protein PDS5 homolog B	PDS5B	SKQHRVSRRAQQRAESPESSAIESTQSTPQK	1358
0.570366	0.0340564	-0.0228024	-0.428242	-0.262373	0.288186	-0.418575	0.264851	-0.2342	0.020697	-0.017144	0.122137	1	Q9NTI5	Sister chromatid cohesion protein PDS5 homolog B	PDS5B	KRLKEDILENEDEQNSPPKKGKRGRPPKPLG	1283
-0.735263	0.733488	-0.893932	0.804144	-0.878096	0.342848	-0.344312	0.565325	-0.366979	0.161967	-0.158414	0.314788	0.990717	Q9NTI5	Sister chromatid cohesion protein PDS5 homolog B	PDS5B	RMETVSNASSSSNPSSPGRIKGRLDSSEMDH	1166
-0.922794	0.717722	-0.706468	0.840822	-0.707149	0.699999	-0.849571	0.905913	-1.01846	1.02067	-1.09687	1.11726	0.969183	Q9NTJ3	Structural maintenance of chromosomes protein 4	SMC4	RREEGPPPPSPDGASSDAEPEPPSGRTESPA	28
-0.0279848	-0.220645	0.061523	0.00687139	0.0306374	-0.476956	0.149412	-0.0281584	0.0365204	-0.366218	0.0704448	-0.0378617	0.998597	Q9NTJ3	Structural maintenance of chromosomes protein 4	SMC4	ASSDAEPEPPSGRTESPATAAETASEELDNR	41
1.69843	-1.19808	1.20934	-2.00139	0.65138	-0.574084	0.57262	-2.28362	1.2852	-1.10762	1.11117	-1.9166	0.978136	Q9NUL3	Double-stranded RNA-binding protein Staufen homolog 2	STAU2	SPKDMNQPSSSFFSISPTSNSSATIARELLM	455
-0.497055	0.449901	-0.438647	1.27207	-0.445497	0.438347	-0.521458	1.24388	-0.804378	0.358817	-0.355264	0.655317	1	Q9NUP7	tRNA:m(4)X modification enzyme TRM13 homolog	TRMT13	TSNSTTKRQDNQNDDSEEHDDGGYRITDDGA	397
1.03768	-1.03945	1.32171	-1.33702	0.765318	-0.991826	0.787463	-0.762839	1.09265	-1.09043	1.17605	-1.81292	1	Q9NUQ3	Gamma-taxilin	TXLNG	EDEGSDFITENRNLVSPAYCTQESREEIPGG	97
-1.63008	0.915391	-0.904137	1.35713	-1.07034	0.839139	-0.840604	1.69265	-1.62618	1.1277	-1.12415	1.23978	0.999997	Q9NUQ3	Gamma-taxilin	TXLNG	TENRNLVSPAYCTQESREEIPGGEARTDPPD	105
0.586053	-1.09278	1.96212	-0.607166	0.409822	-0.484808	1.19872	-0.407343	-0.434852	-0.0284305	0.0357456	0.0329118	0.999998	Q9NUQ6	SPATS2-like protein	SPATS2L	QYHNNRLNGPAKSQGSGNEAEPLGKGNSRHE	455
0.921645	-0.540708	0.413507	-0.421592	0.707918	-0.506841	0.505377	-0.869097	0.88966	-0.790791	0.242487	-0.242487	1	Q9NUY8	TBC1 domain family member 23	TBC1D23	STSGSRSSINSVDGESPNGSSDRGMKSLVNK	474
-0.281366	0.271002	-0.259748	0.557917	-0.22146	0.21431	-0.227386	0.664808	-0.17155	0.173762	-0.195747	0.554883	0.997261	Q9NV56	MRG/MORF4L-binding protein	MRGBP	SRVTDKVLTANSNPSSPSAAKRRRT______	195
0.0358827	0.222468	-0.0463012	-0.298696	0.0335018	-0.0406517	0.0601541	-0.641691	-0.160577	0.0681898	-0.0646367	0.162038	0.899526	Q9NV70	Exocyst complex component 1	EXOC1	LTGSTSSLNKLSVQSSGNRRSQSSSLLDMGN	482
-0.242918	0.241144	-0.309751	0.588105	-0.491672	0.484522	-0.558433	0.656986	-0.560513	0.32649	-0.322937	0.744743	1	Q9NVF7	F-box only protein 28	FBXO28	ESAVGNSSGSGQNEESPRKRKKATEAIDSLR	344
0.686774	-0.688548	0.845049	-1.11589	0.631996	-0.639146	0.819113	-1.63564	0.584727	-0.582515	0.591603	-0.711443	0.943489	Q9NVI1	Fanconi anemia group I protein	FANCI	SYGPKKVLDGKTIETSPSLSRMPNQHACKLG	407
-0.542776	0.371863	-0.360609	0.568494	-0.60569	0.448593	-0.450058	1.03148	-0.191874	0.194086	-0.449092	0.875888	1	Q9NVM6	DnaJ homolog subfamily C member 17	DNAJC17	KLDLEARERQAQAQESEEEEESRSTRTLEQE	112
-0.458794	0.440454	-0.4292	0.701715	-0.433496	0.511525	-0.660389	0.435975	-0.261708	0.266656	-0.477081	0.260366	0.983613	Q9NVR2	Integrator complex subunit 10	INTS10	IENQHQGAQDTSDLMSPSKRSSQKYIIEGLT	231
0.656686	-0.934326	0.172192	-0.180277	-0.130492	0.112348	0.36211	-0.11942	0.402742	-0.304174	0.307727	-0.421187	0.833139	Q9NVW2	E3 ubiquitin-protein ligase RLIM	RLIM	GSQNSENENEPSARRSSGENVENNSQRQVEN	163
0.552618	-0.537407	0.340934	-0.349019	0.0484678	-0.0556177	0.194144	-0.287386	0.0368755	-0.587741	0.00095652	-0.00095652	0.881737	Q9NVW2	E3 ubiquitin-protein ligase RLIM	RLIM	SQNSENENEPSARRSSGENVENNSQRQVENP	164
0.528375	-0.639976	0.445914	-0.454	-0.0509513	0.0110725	-0.0125371	0.0847239	-0.06001	0.389421	0.0577406	-0.0847527	0.991893	Q9NW75	G patch domain-containing protein 2	GPATCH2	HSDSDDQMLVAKRRPSSNLNNNVRGKRPLWH	129
-0.369739	0.367965	-0.575527	0.677814	-0.227436	0.212429	-0.213893	0.66658	-0.365779	0.305321	-0.301768	0.731756	0.987886	Q9NWB6	Arginine and glutamate-rich protein 1	ARGLU1	NTAVSRRERDRERASSPPDRIDIFGRTVSKR	77
-0.499621	0.497847	-0.66219	0.965129	-0.574107	0.566957	-0.798188	1.25625	-0.632917	0.492713	-0.48916	1.11812	1	Q9NWC5	Transmembrane protein 45A	TMEM45A	SSEVGLLKNAEREQESEEEM___________	271
0.0428075	-0.0977762	0.137911	-0.0639209	0.022298	-0.029448	-0.145993	0.201625	0.309582	-0.185301	0.188854	-0.92426	1	Q9NWF9	E3 ubiquitin-protein ligase RNF216	RNF216	RVSINGYDHFCQHPRSPGAPCQECSRCSLWT	719
0.413723	-0.30016	0.311414	-0.725244	0.232446	-0.239596	0.300619	-0.697183	0.331031	-0.328819	0.551322	-0.768799	0.99933	Q9NWH9	SAFB-like transcription modulator	SLTM	GRAGAGMITQHSSNASPINRIVQISGNSMPR	1002
-0.551735	0.699686	-0.190601	0.182516	-0.410191	0.329251	-0.330716	0.64601	-0.395861	0.398073	-0.469236	0.611078	1	Q9NWH9	SAFB-like transcription modulator	SLTM	SEASKPKDGQDAIAQSPEKESKDYEMNANHK	289
-0.358408	0.290501	-0.279247	0.505424	-0.435361	0.428211	-0.615279	0.622569	-0.408663	0.279889	-0.276336	0.864143	1	Q9NWH9	SAFB-like transcription modulator	SLTM	ESIKKSEEKKRISSKSPGHMVILDQTKGDHC	553
1.11825	-1.30091	1.02431	-1.03239	0.770831	-0.731063	0.729598	-1.09537	0.853633	-0.83255	0.836103	-1.0003	0.999797	Q9NWH9	SAFB-like transcription modulator	SLTM	SNASPINRIVQISGNSMPRGSGSGFKPFKGG	1014
-0.122283	0.127552	0.111864	-0.17023	-0.0401067	0.231735	0.0481927	-0.811834	0.03295	0.299956	-0.0352195	-0.557822	0.998063	Q9NWT1	p21-activated protein kinase-interacting protein 1	PAK1IP1	KVADMKESLPPAAEPSPVSKEQSKIGKKEPG	320
-0.78634	0.342777	-0.331523	0.927653	-0.787086	0.220393	-0.221858	1.01686	-0.742136	0.308258	-0.304705	0.791319	0.999444	Q9NWV8	BRISC and BRCA1-A complex member 1	BABAM1	EEEEEHSAEPRPRTRSNPEGAEDRAVGAQAS	29
-0.13781	-0.234618	0.311271	0.116697	-0.385444	-0.0492929	0.0858854	0.0422213	0.0288782	-0.0266664	0.534345	-0.200156	1	Q9NX58	Cell growth-regulating nucleolar protein	LYAR	GSAGKRSKKKKQRKDSASEEEARVGAGKRKR	258
-0.114386	0.112612	-0.44767	0.352681	-0.298197	0.202871	-0.204336	0.30099	0.0382395	-0.220737	0.582198	-0.0395808	1	Q9NX58	Cell growth-regulating nucleolar protein	LYAR	AGKRSKKKKQRKDSASEEEARVGAGKRKRRH	260
0.993618	-1.5094	1.08129	-1.01473	0.428473	-0.874277	0.476082	-0.425994	0.692139	-0.689927	0.80701	-0.737693	0.999998	Q9NX58	Cell growth-regulating nucleolar protein	LYAR	EEEARVGAGKRKRRHSEVETDSKKKKMKLPE	276
0.559905	-0.505017	0.516271	-1.49664	0.41073	-0.41788	0.484762	-1.91699	0.0777408	-0.710299	0.00381349	-0.00381349	1	Q9NXR1	Nuclear distribution protein nudE homolog 1	NDE1	LESKLASCRNLVYDQSPNRTGGPASGRSSKN	282
-0.474312	0.472538	-0.538615	0.737303	-0.505881	0.498731	-0.596052	0.94568	-0.527622	0.529834	-0.673729	0.809933	0.99974	Q9NXV6	CDKN2A-interacting protein	CDKN2AIP	NSHMTQSTDSRQQSGSPKKSALEGSSASASQ	268
-0.0382114	0.0364373	0.176109	-0.142117	0.121751	0.0750159	-0.0764805	-0.30759	0.193118	0.0504161	-0.046863	-0.149634	0.985344	Q9NY27	Serine/threonine-protein phosphatase 4 regulatory subunit 2	PPP4R2	SNSLNRMNGVMFPGNSPSYTERSNINGPGTP	159
-0.230655	0.46523	-0.556281	0.209542	-0.27715	0.424816	-0.403747	0.279629	-0.151484	0.605312	-0.512102	0.150143	0.999578	Q9NYB0	Telomeric repeat-binding factor 2-interacting protein 1	TERF2IP	LRGQEHKYLLGDAPVSPSSQKLKRKAEEDPE	203
-0.0672418	0.239459	0.0568233	-0.10121	-0.0708243	0.224874	0.0789103	-0.0941433	-0.0676994	0.216318	0.0654299	-0.198956	1	Q9NYB9	Abl interactor 2	ABI2	DYVPSPTRNMAPSQQSPVRTASVNQRNRTYS	227
-0.468565	0.442203	-0.430948	0.484166	-0.473369	0.34673	-0.348194	0.586801	-0.348912	0.0942118	-0.0906587	0.471543	1	Q9NYF8	Bcl-2-associated transcription factor 1	BCLAF1	QEKQTKKAEGEPQEESPLKSKSQEEPKDTFE	177
-0.469929	0.468155	-0.529142	0.614822	-0.467732	0.460582	-0.552718	0.81331	-0.424984	0.427196	-0.586286	0.656214	1	Q9NYF8	Bcl-2-associated transcription factor 1	BCLAF1	HKNLDAREKSTFREESPLRIKMIASDSHRPE	531
-0.517368	0.417324	-0.40607	0.472392	-0.458367	0.474542	-0.434997	0.443161	-0.219171	0.188217	-0.184664	0.418094	1	Q9NYF8	Bcl-2-associated transcription factor 1	BCLAF1	EDKNSERITVKKETQSPEQVKSEKLKDLFDY	496
-0.665907	0.593183	-0.581929	0.881138	-0.51989	0.51274	-0.52848	0.904282	-0.536712	0.436643	-0.43309	0.671019	1	Q9NYF8	Bcl-2-associated transcription factor 1	BCLAF1	DYFSDKESGKQKFNDSEGDDTEETEDYRQFR	397
1.08354	-1.08531	1.17089	-1.93918	1.08917	-1.09632	1.09722	-2.39406	0.55601	-0.709809	0.840206	-0.557351	1	Q9NYF8	Bcl-2-associated transcription factor 1	BCLAF1	GLKYKSKVSLKGNRESDGFREEKNYKLKETG	450
-0.697911	0.733414	-0.818997	0.676798	-0.182158	0.175008	-0.19657	0.440344	-0.680832	0.208239	-0.204686	0.332201	0.999897	Q9NYF8	Bcl-2-associated transcription factor 1	BCLAF1	STRQKSPEIHRRIDISPSTLRKHTRLAGEER	658
-2.0372	2.03542	-2.41221	3.15819	-0.943432	0.936282	-3.07166	2.27663	-1.87514	1.87735	-2.01047	3.30567	0.995569	Q9NYF8	Bcl-2-associated transcription factor 1	BCLAF1	EQDHSRSSSSSASPSSPSSREEKESKKEREE	760
0.840425	-0.586617	0.597871	-0.799172	1.07556	-0.683419	0.681955	-1.00092	0.484181	-0.173281	0.152148	-0.152148	0.999308	Q9NYJ8	TGF-beta-activated kinase 1 and MAP3K7-binding protein 2	TAB2	HHPPKSRAIGNNSATSPRVVVTQPNTKYTFK	450
1.18843	-0.938661	0.949915	-1.69145	0.675591	-0.550245	0.548781	-0.787926	1.02398	-0.861948	0.865501	-1.36778	1	Q9NYM9	BET1-like protein	BET1L	_______MADWARAQSPGAVEEILDRENKRM	9
1.4946	-0.896089	0.878606	-0.886692	0.464669	-0.751274	0.511511	-0.46219	-0.358461	0.222	-0.204991	0.204991	0.999973	Q9NYP9	Protein Mis18-alpha	MIS18A	DKGKCSDSSLLGKRLSEDSSRHQLLQKWASM	36
1.15744	-1.03766	1.04892	-2.76419	0.886054	-0.679518	0.678054	-1.12274	0.667743	-0.544354	0.547907	-0.76979	0.760539	Q9NYV4	Cyclin-dependent kinase 12	CDK12	GKKDGSGGASGTLQPSSGGGSSNSRERHRLV	24
1.32928	-1.33105	1.39031	-1.89054	1.12698	-0.748831	0.747367	-1.46613	0.457734	-0.537625	0.396596	-0.396596	0.904616	Q9NYV4	Cyclin-dependent kinase 12	CDK12	SGGASGTLQPSSGGGSSNSRERHRLVSKHKR	29
-0.416354	0.41458	-0.548857	0.579573	-0.515571	0.46344	-0.464904	0.512756	-0.336646	0.338857	-0.3991	0.339774	0.99648	Q9NYV4	Cyclin-dependent kinase 12	CDK12	KETTSGTSTEPVKNSSPAPPQPAPGKVESGA	1083
1.21074	-1.59425	1.32105	-1.23186	0.817603	-0.598865	0.597401	-0.693633	0.24016	-0.365491	0.27642	-0.241501	1	Q9NYV4	Cyclin-dependent kinase 12	CDK12	DCHELWSKKRRRQRQSGVVVEEPPPSKTSRK	1053
1.17187	-1.54354	1.08174	-1.08983	1.33903	-1.31745	1.31599	-2.74039	1.04386	-1.04165	1.16515	-1.6156	0.975794	Q9NYZ3	G2 and S phase-expressed protein 1	GTSE1	PNKLGLKKTLLKAPGSTSNLARKSSSGPVWS	303
1.65769	-1.06331	0.956913	-0.964998	1.19931	-0.372227	0.370763	-0.740563	1.63374	-0.92108	0.924633	-2.49102	0.995261	Q9NYZ3	G2 and S phase-expressed protein 1	GTSE1	STPKLSRAQRPQSCTSVGRVTVHSTPVRRSS	480
0.820142	-0.718967	0.730221	-1.49716	1.67136	-1.51924	1.51777	-1.91583	0.700603	-0.668428	0.671982	-2.05276	0.857111	Q9NYZ3	G2 and S phase-expressed protein 1	GTSE1	SPLLGPPVGEPRLLASSPALPSSGAQARLTR	167
1.59292	-1.56886	1.52822	-1.53631	1.75198	-1.16353	1.16207	-2.63697	0.979531	-0.977319	1.43679	-1.37624	0.987172	Q9NYZ3	G2 and S phase-expressed protein 1	GTSE1	PLLGPPVGEPRLLASSPALPSSGAQARLTRA	168
-0.587128	1.115	-1.06258	0.566014	-0.760297	1.13803	-0.708171	0.716336	-0.532273	1.06872	-0.998637	0.530932	0.999987	Q9NYZ3	G2 and S phase-expressed protein 1	GTSE1	RKTDSRLVDVSPDRGSPPSRVPQALNFSPEE	580
-0.49983	0.498056	-0.531474	0.54896	-0.200616	0.193466	-0.479831	0.38727	-0.373282	0.33675	-0.333197	0.616195	1	Q9NZ63	Uncharacterized protein C9orf78	C9orf78	RPLRVGDTEKPEPERSPPNRKRPANEKATDD	261
0.780827	-0.782601	1.60173	-1.24398	0.138685	-0.145835	0.50619	-0.540971	0.0244228	0.561052	-0.18668	-0.0257641	0.999894	Q9NZD8	Maspardin	SPG21	VSAEELEVQKGSLGISQEEQ___________	304
-0.344866	0.189627	-0.178373	0.487339	-0.2184	0.149267	-0.150732	0.618844	-0.0372334	0.0394451	-0.200654	0.271827	1	Q9NZI8	Insulin-like growth factor 2 mRNA-binding protein 1	IGF2BP1	GRRGGFGSRGQPRQGSPVAAGAPAKQQQVDI	181
-2.26328	1.6187	-1.60745	2.88078	-2.40936	1.34567	-1.34714	2.77725	-1.33032	1.15595	-1.1524	2.3404	0.98336	Q9NZJ0	Denticleless protein homolog	DTL	LAMAAKRKAENPSPRSPSSQTPNSRRQSGKK	679
-0.379281	0.377507	-0.516468	0.576594	-0.261039	0.253889	-0.25926	0.782357	-0.30768	0.309892	-0.61752	0.425352	0.993384	Q9NZJ0	Denticleless protein homolog	DTL	RPCGEGSEMVGKENSSPENKNWLLAMAAKRK	656
0.0402861	0.0696307	-0.0507046	-0.979637	-0.059464	0.0523141	0.294019	-0.0608279	0.420224	-0.0613239	0.064877	-0.665068	0.972057	Q9NZN5	Rho guanine nucleotide exchange factor 12	ARHGEF12	KSETIQDTDTQSLVGSPSTRIAPHIIGAEDD	341
-0.272718	-0.13512	0.146374	0.619464	-0.017046	-0.0706097	0.025132	0.447627	-0.311098	0.0657534	-0.0622003	0.440658	0.85599	Q9NZN5	Rho guanine nucleotide exchange factor 12	ARHGEF12	SVQEDWQHFPRYRTASQGPQTDSVIQNSENI	1288
0.231437	0.111681	-0.100427	-1.07641	0.242204	0.322544	-0.234118	-0.970545	0.322887	0.118148	-0.114595	-1.1046	1	Q9NZN5	Rho guanine nucleotide exchange factor 12	ARHGEF12	CSSGDASRPSSDNADSPKSGPKERIYLEENP	309
-1.50101	2.06787	-1.47512	1.46704	-1.84627	1.98944	-1.61449	1.62265	-1.66157	1.82206	-1.4385	1.4385	0.999999	Q9NZN8	CCR4-NOT transcription complex subunit 2	CNOT2	GIPSRTNSMSSSGLGSPNRSSPSIICMPKQQ	165
-0.556925	0.0368112	-0.0255572	0.101776	0.404468	0.0846554	-0.198205	-0.091727	-0.521838	-0.00549454	0.00904761	0.138317	1	Q9NZT2	Opioid growth factor receptor	OGFR	LPHPLEGSRKVEEEGSPGDPDHEASTQGRTC	315
-0.379569	0.460938	-0.40449	0.358456	-0.451332	0.39706	-0.398525	0.577121	-0.2796	0.218546	-0.214993	0.301399	1	Q9NZT2	Opioid growth factor receptor	OGFR	GDEAGGHGEDRPEPLSPKESKKRKLELSRRE	378
-0.417091	0.415316	-0.666138	0.458811	-0.15123	0.295658	-0.423393	0.153709	0.0915039	0.344685	-0.522317	-0.0928452	0.999948	Q9P0V9	Septin-10	2010-09-01	QSHMATKTTCMSSQGSDDEQIKRENIRSLTM	28
-0.322233	0.320459	-0.45811	0.325393	-1.32047	1.31332	-1.90947	1.93759	-0.840424	0.358334	-0.354781	0.606176	0.996583	Q9P1Y5	Calmodulin-regulated spectrin-associated protein 3	CAMSAP3	DLPDGHAASPRGTEASPPQNNSGSSSPVFTF	341
0.703048	-0.704823	0.851849	-0.760814	0.359451	-0.3666	0.574498	-0.755844	0.381942	-0.37973	0.520115	-0.912963	0.997975	Q9P206	Uncharacterized protein KIAA1522	KIAA1522	SPASVRSLGRFSSVSSPQPRSRHPSSSSDTW	342
-0.516955	0.123421	-0.112167	0.3582	-0.317455	0.0436258	-0.0450904	0.665947	-0.203633	-0.0386976	0.0422507	0.219902	0.999868	Q9P206	Uncharacterized protein KIAA1522	KIAA1522	SNSVVPPPQGGSGRGSPSGGSTAEASDTLSI	404
0.738666	-0.361485	0.247713	-0.255798	0.609185	-0.319688	0.173518	-0.165354	0.487316	-0.16324	0.166793	-0.295486	0.997661	Q9P246	Stromal interaction molecule 2	STIM2	RSSSLCRSRRSIVPSSPQPQRAQLAPHAPHP	523
1.36325	-1.27058	1.28184	-2.38905	1.0223	-1.02945	1.54586	-3.56609	1.24846	-1.24625	1.31614	-2.17789	0.972586	Q9P265	Disco-interacting protein 2 homolog B	DIP2B	QKGYEKKRSKLLSPYSPQTQETDSAVQKELR	53
0.183217	-0.184992	0.296644	-1.41231	-0.0471894	0.0400395	0.162841	-1.83436	0.304314	-0.302102	0.37733	-1.53975	1	Q9P270	SLAIN motif-containing protein 2	SLAIN2	SPVRAGASIPSSGAASPRGFPLGLSAKSGGG	63
0.390077	-0.391851	0.601709	-0.495051	-0.00938981	-0.268813	0.323653	0.0118688	-0.3362	0.327803	-0.32425	0.70659	0.999999	Q9P270	SLAIN motif-containing protein 2	SLAIN2	SRSGAVQGAGSLGPGSPVRAGASIPSSGAAS	48
-0.103778	0.102004	-0.177015	0.615753	-0.133681	0.126531	-0.395582	0.514219	-0.224085	0.226297	-0.342762	0.401853	1	Q9P275	Ubiquitin carboxyl-terminal hydrolase 36	USP36	PVVASTWPVHRARAVSPAPQSSSRLQPPFSP	742
0.219512	-0.000161841	0.0114159	-1.45407	0.149722	-0.0939637	0.0924991	-1.45763	0.0764818	0.117998	-0.0787513	-0.302045	0.910153	Q9P275	Ubiquitin carboxyl-terminal hydrolase 36	USP36	QRQGSWDSRDVVLSTSPKLLATATANGHGLK	582
2.17411	-1.90776	1.91901	-2.68402	1.81277	-1.40128	1.39982	-4.43031	0.280893	-1.70987	0.110959	-0.110959	0.999638	Q9P275	Ubiquitin carboxyl-terminal hydrolase 36	USP36	HFSPRTAQGLPGTSNSNSSRSGSQRQGSWDS	559
-1.526	1.4607	-1.29248	1.28439	-0.601489	0.568617	-0.570082	0.624012	-1.41492	1.43188	-1.23473	1.23473	0.997749	Q9P2B4	CTTNBP2 N-terminal-like protein	CTTNBP2NL	FQSQADQDQQASGLQSPPSRDLSPTLIDNSA	481
0.546859	-0.548633	0.636423	-1.26791	0.270908	-0.225111	0.223647	-0.571908	0.186541	-0.347628	0.445697	-0.187883	0.998339	Q9P2B4	CTTNBP2 N-terminal-like protein	CTTNBP2NL	RNLANTANPRGDTSHSPTPGKVSSPLSPLSP	549
-0.392988	0.301644	-0.290389	0.605609	-0.445709	0.296292	-0.297756	0.832263	-0.5568	0.229249	-0.225696	0.343618	1	Q9P2D1	Chromodomain-helicase-DNA-binding protein 7	CHD7	AFEEDIETPPTRNIPSPGQLDPDTRIPVINL	2559
0.589359	-0.0958776	0.107132	-0.453483	0.598978	0.0271657	-0.0286303	-0.34344	0.466283	-0.109196	0.00104268	-0.00104268	1	Q9P2E9	Ribosome-binding protein 1	RRBP1	KKAEGSPSEGKKAEGSPNQGKKADAAANQGK	583
0.422955	-0.0494342	0.0606883	-0.375443	0.742902	-0.320605	0.31914	-0.672552	0.784466	-0.412601	0.416154	-0.831852	0.995085	Q9P2E9	Ribosome-binding protein 1	RRBP1	TKVEGITNQGKKAEGSPSEGKKAEGSPNQGK	573
0.995072	-0.39003	0.401284	-0.7479	1.00101	-0.64979	0.648326	-1.47384	0.868902	-0.894444	0.207571	-0.207571	1	Q9P2E9	Ribosome-binding protein 1	RRBP1	TESASVQGRNTDVAQSPEAPKQEAPAKKKSG	615
1.0146	-0.642597	0.653851	-0.740401	0.633178	-0.579046	0.577581	-0.973079	0.72337	-0.506951	0.510504	-0.544654	0.999992	Q9P2E9	Ribosome-binding protein 1	RRBP1	MKSHVEDGDIAGAPASSPEAPPAEQDPVQLK	1276
1.0146	-0.642597	0.653851	-0.740401	0.633178	-0.579046	0.577581	-0.973079	0.865591	-0.592955	0.596509	-0.835029	0.999992	Q9P2E9	Ribosome-binding protein 1	RRBP1	KSHVEDGDIAGAPASSPEAPPAEQDPVQLKT	1277
-0.0747574	0.21518	-0.133688	0.053644	0.32091	0.0240137	-0.0254783	-0.831416	0.394455	0.181148	-0.177595	-0.178116	0.999663	Q9P2M7	Cingulin	CGN	NHVGTSKQPAQSQNLSPLSGFSRSRQTQDWV	258
-0.345169	0.498505	-0.512724	0.324056	-0.330264	0.440547	-0.520723	0.332743	-0.299497	0.401701	-0.440981	0.298155	0.998371	Q9P2R6	Arginine-glutamic acid dipeptide repeats protein	RERE	RTSPINEDIRSSGRNSPSAASTSSNDSKAET	613
-0.528301	0.37006	-0.358806	0.575253	-0.320929	0.313779	-0.567871	0.873158	-0.473284	0.475495	-0.498874	0.735978	1	Q9UBB5	Methyl-CpG-binding domain protein 2	MBD2	LSRAADTEEMDIEMDSGDEA___________	407
-0.369857	0.368083	-0.439542	0.598866	-0.414369	0.407219	-0.913625	0.566016	-0.334753	0.687327	-0.725592	0.333411	1	Q9UBF8	Phosphatidylinositol 4-kinase beta	PI4KB	SVPARIPENRIRSTRSVENLPECGITHEQRA	428
-0.344512	0.198438	-0.187184	0.191647	0.226284	-0.233434	0.438405	-0.236427	-0.495878	0.474306	-0.470753	0.618685	0.876025	Q9UBI6	Guanine nucleotide-binding protein G(I)/G(S)/G(O) subunit gamma-12	GNG12	_________MSSKTASTNNIAQARRTVQQLR	7
0.851933	-0.63495	0.646205	-1.14938	1.00114	-0.817115	0.81565	-2.87461	1.16233	-0.854073	0.857626	-1.91513	0.999953	Q9UBK8	Methionine synthase reductase	MTRR	SSRGQEEISGALPVASPASSRTDLVKSELLH	171
-1.94146	1.59626	-1.58501	2.15329	-2.4229	1.75694	-1.75841	2.44406	-2.05642	1.46506	-1.46151	1.86206	0.786902	Q9UBK8	Methionine synthase reductase	MTRR	WIAGLWPALRKHFRSSRGQEEISGALPVASP	157
0.160627	0.171107	-0.159853	-1.80149	0.0383246	0.0183023	-0.130026	-0.0253739	0.164573	-0.112362	0.115915	-0.457875	1	Q9UBN7	Histone deacetylase 6	HDAC6	DSTTTRQRRSRQNPQSPPQDSSVTSKRNIKK	22
-0.579296	0.519868	-0.508614	1.08981	-0.591739	0.16618	-0.167644	1.01366	-0.446969	0.449181	-0.516797	1.23772	0.991289	Q9UBQ5	Eukaryotic translation initiation factor 3 subunit K	EIF3K	VEKIDFDSVSSIMASSQ______________	217
0.101963	-0.223956	0.295443	-0.123076	-0.285046	0.277896	-0.307888	0.372437	-0.268743	0.270955	-0.299458	0.438414	1	Q9UDY2	Tight junction protein ZO-2	TJP2	FGPSRDRDRDRSRGRSIDQDYERAYHRAYDP	244
1.50544	-1.65797	1.79772	-1.52656	1.10697	-1.11412	1.31083	-2.20978	0.519783	-0.931104	0.828719	-0.521125	0.999996	Q9UDY4	DnaJ homolog subfamily B member 4	DNAJB4	SAFGFSMNGYPRDRNSVGPSRLKQDPPVIHE	148
-0.581008	0.571774	-0.279084	0.270999	-0.184833	0.177683	-0.390771	0.494247	-0.448995	0.373345	-0.369792	0.429426	0.990174	Q9UER7	Death domain-associated protein 6	DAXX	EDEEEEAAAGKDGDKSPMSSLQISNEKNLEP	495
1.65146	-1.47716	1.48841	-2.32072	1.28207	-1.21623	1.21477	-2.37174	0.782151	-0.789355	0.594135	-0.594135	0.994343	Q9UER7	Death domain-associated protein 6	DAXX	ISNEKNLEPGKQISRSSGEQQNKGRIVSPSL	517
-2.42635	1.50295	-1.49169	2.11538	-1.52442	1.29573	-1.29719	2.36617	-1.56154	1.56375	-1.69955	2.25449	0.917672	Q9UFC0	Leucine-rich repeat and WD repeat-containing protein 1	LRWD1	VPLSLSPSKRACASPSAQVEGSPVAGSDGSQ	253
-1.14846	1.98188	-0.829753	0.821668	-1.49062	1.85098	-0.820904	0.829068	-1.21929	1.79489	-1.1206	1.1206	1	Q9UFC0	Leucine-rich repeat and WD repeat-containing protein 1	LRWD1	PSKRACASPSAQVEGSPVAGSDGSQPAVKLE	259
-0.277835	0.276061	-0.27613	0.261927	-0.315467	0.109072	-0.110536	0.375513	-0.160106	0.162318	-0.245848	0.243951	0.924782	Q9UGU0	Transcription factor 20	TCF20	SDTTYKGGASEKAGSSPAQGAQNEPPRLNAS	559
-0.166589	0.46698	0.0113955	-0.0194808	-0.18936	0.355196	-0.113011	0.121176	-0.137997	0.58852	-0.345107	0.136656	0.999996	Q9UGU0	Transcription factor 20	TCF20	DIKSIPKRDSSKDLPSPDSRNCPAVTLTSPA	1322
-0.567864	0.462282	-0.451028	0.508132	-0.478395	0.471078	-0.472542	0.605914	-0.446962	0.47026	-0.496868	0.445621	0.994442	Q9UGU0	Transcription factor 20	TCF20	PPRLNASPAAREEATSPGAKDMPLSSDGNPK	583
-0.243446	0.10199	-0.0907354	0.141643	-1.16765	0.15817	-0.159634	0.481567	-0.409321	0.0191643	-0.0156112	0.0722085	0.999207	Q9UGU0	Transcription factor 20	TCF20	CSSSSEDQGERVRQLSGQSTSSDTTYKGGAS	538
-0.747672	0.745898	-1.00882	1.14528	-0.755476	0.748326	-0.977906	1.17428	-1.28179	1.284	-1.58678	1.55531	0.999582	Q9UGV2	Protein NDRG3	NDRG3	GSGESPFSRSVTSNQSDGTQESCESPDVLDR	352
-0.0269938	0.155526	0.0165753	-1.00066	-0.0236079	0.186714	0.0316939	-0.59091	-0.00859043	0.0726586	0.00632097	-1.01114	0.997734	Q9UHB6	LIM domain and actin-binding protein 1	LIMA1	KPLSPDSRASSLSESSPPKAMKKFQAPARET	374
-0.0958636	-0.166747	0.0854451	0.126873	-0.0643902	-0.125776	0.0724762	0.350762	-0.289044	0.104777	-0.101224	0.158132	0.999999	Q9UHB6	LIM domain and actin-binding protein 1	LIMA1	LERPAQLANARETPHSPGVEDAPIAKVGVLA	490
-0.0704392	0.307574	0.0600206	-0.122233	0.0726155	-0.354262	0.558576	-0.0701365	-0.276698	0.26909	-0.0643958	0.0643958	0.999898	Q9UHB6	LIM domain and actin-binding protein 1	LIMA1	QVKSEVQQPVHPKPLSPDSRASSLSESSPPK	362
-0.226289	0.224515	-1.06681	0.564528	0.102249	-0.109399	-0.384389	0.532189	-0.0969302	0.099142	-0.715385	0.46544	1	Q9UHB6	LIM domain and actin-binding protein 1	LIMA1	GADSDEDDNSFLKQQSPQEPKSLNWSSFVDN	698
1.37113	-0.909105	0.920359	-3.09249	1.06945	-0.681893	0.680428	-2.70111	1.11278	-0.780595	0.784148	-2.53627	0.871564	Q9UHB7	AF4/FMR2 family member 4	AFF4	SNSNKETSGSSKNSSSTSKQKKTEGKTSSSS	860
0.722781	-0.163765	0.175019	-0.50372	0.499024	-0.0971663	0.0957017	-1.09123	0.53969	-0.0996984	0.103252	-0.591934	0.999996	Q9UHB7	AF4/FMR2 family member 4	AFF4	LTEHLKNSYNNSQAPSPGLGSKAVGMPSPVS	1043
-0.300449	0.298675	-0.66997	0.286021	-0.247716	0.737427	-0.51695	0.250195	-0.158866	0.161078	-0.667912	0.260321	0.999997	Q9UHB7	AF4/FMR2 family member 4	AFF4	KTIQKGSESGRGRQKSPAQSDSTTQRRTVGK	549
0.328912	-0.330687	0.601383	-0.475261	2.08826	-0.696822	0.695357	-2.64693	0.192953	-0.496213	0.62276	-0.194294	0.999999	Q9UHB9	Signal recognition particle subunit SRP68	SRP68	MAAEKQVPGGGGGGGSGGGGGSGGGGSGGGR	16
2.08451	-2.08628	2.22593	-2.9523	2.07966	-1.81121	1.80975	-3.67559	0.961823	-0.959612	1.14751	-1.3912	0.979756	Q9UHD8	Septin-9	2009-09-01	PRRVQTPLLRATVASSTQKFQDLGVKNSEPS	59
-2.03795	1.57831	-1.56706	2.17089	-1.04636	1.03921	-2.00098	1.39376	-2.06627	1.09827	-1.09471	1.4043	1	Q9UHD8	Septin-9	2009-09-01	RLRRLGDSSGPALKRSFEVEEVETPNSTPPR	30
-0.291973	0.256175	0.167563	-0.175648	-0.136574	0.309658	0.14466	-0.160588	-0.190317	0.366568	0.188047	-0.218481	0.997423	Q9UHF7	Zinc finger transcription factor Trps1	TRPS1	ETGQAQSGQANCQGLSPVSVASKNPQVPSDG	178
-0.843341	0.841567	-2.16709	1.08754	-0.894025	0.886875	-2.06371	1.40241	-0.842729	0.347309	-0.343756	0.808195	0.975279	Q9UHI6	Probable ATP-dependent RNA helicase DDX20	DDX20	TSSQSKGNKSYLEGSSDNQLKDSESTPVDDR	678
-1.22441	1.10238	-1.09113	1.38468	-0.95666	0.710091	-0.711555	1.27242	-1.01118	1.01339	-1.17096	1.40975	0.999106	Q9UHI6	Probable ATP-dependent RNA helicase DDX20	DDX20	TPVDDRISLEQPPNGSDTPNPEKYQESPGIQ	703
1.30125	-1.28123	1.29249	-2.55332	1.249	-1.22382	1.22235	-2.6289	1.36847	-1.33809	1.34164	-2.21575	0.99309	Q9UHI6	Probable ATP-dependent RNA helicase DDX20	DDX20	TPGPVRILRTAQDLSSPRTRTGDVLLAEPAD	48
-0.0701551	0.338291	0.0597366	-0.529534	-0.0352227	0.405169	0.0433086	-0.585248	-0.118903	0.121115	-0.152899	0.462834	0.999997	Q9UHI6	Probable ATP-dependent RNA helicase DDX20	DDX20	PPNGSDTPNPEKYQESPGIQMKTRLKEGASQ	714
-0.855538	0.820716	-0.809462	0.825023	-0.937389	0.708761	-0.586863	0.595028	-0.289535	0.291747	-0.614057	0.787681	0.999931	Q9UHR4	Brain-specific angiogenesis inhibitor 1-associated protein 2-like protein 1	BAIAP2L1	IKTPASTPVSGTPQASPMIERSNVVRKDYDT	261
-0.268189	0.501139	-0.521473	0.247075	-0.31661	0.415718	-0.740958	0.319088	-0.191673	0.412406	-0.550448	0.190332	0.986444	Q9UHY1	Nuclear receptor-binding protein	NRBP1	______________MSEGESQTVLSSGSDPK	2
1.82899	-1.83077	2.41355	-2.0669	1.40601	-1.41316	2.29977	-3.40936	0.800567	-0.798355	1.62724	-1.99015	0.986418	Q9UI08	Ena/VASP-like protein	EVL	TSPSPGTRAASQPPNSSEAGRKPWERSNSVE	318
1.05822	-1.05999	1.46502	-1.93085	0.942732	-0.949882	1.26092	-1.55669	0.623207	-0.620995	0.83299	-0.821829	0.976514	Q9UI08	Ena/VASP-like protein	EVL	KLRRVQRPEDASGGSSPSGTSKSDANRASSG	246
0.162842	0.367491	-0.17326	-0.246849	0.0746957	0.446094	-0.0666097	-0.397645	0.14609	0.357678	-0.148359	-0.219092	0.997064	Q9UIF7	A/G-specific adenine DNA glycosylase	MUTYH	QQPGTCMGSKRSQVSSPCSRKKPRMGQQVLD	512
-0.0835737	0.858983	-0.354329	0.0624603	-0.0378702	0.900687	-0.441965	0.0403492	-0.0133554	0.826654	-0.382997	0.0120141	0.999595	Q9UIF9	Bromodomain adjacent to zinc finger domain protein 2A	BAZ2A	LAPKRRAGDPGEMPQSPTGLGQPKRRGRPPS	1397
0.856766	-0.614468	0.468405	-0.47649	0.862306	-0.298227	0.296762	-0.742999	0.705913	-0.218937	0.22249	-0.789486	0.989545	Q9UIF9	Bromodomain adjacent to zinc finger domain protein 2A	BAZ2A	FSMKMELAGSNTTASSPARARGRPRKTKPGS	1184
0.922415	-0.628219	0.580097	-0.588183	1.23752	-0.905515	0.90405	-1.7136	1.22731	-0.896811	0.900364	-1.39494	1	Q9UIG0	Tyrosine-protein kinase BAZ1B	BAZ1B	QKKETVVKEDEGRRESINDRARRSPRKLPTS	189
-0.629016	0.627242	-1.08633	1.22955	-0.924808	1.13363	-1.14412	0.927287	-0.640798	0.976861	-0.00422309	0.00422309	0.995198	Q9UIG0	Tyrosine-protein kinase BAZ1B	BAZ1B	KYMTLNPSTKRKNTGSPDRKPSKKSKTDNSS	312
-0.373635	0.371861	-0.56439	0.998405	-0.35101	0.34386	-0.66008	1.0656	-0.329174	0.331386	-0.55732	0.664591	1	Q9UIG0	Tyrosine-protein kinase BAZ1B	BAZ1B	KRKKFPDRLAEDEGDSEPEAVGQSRGRRQKK	1468
0.442263	-0.525564	0.181896	-0.189981	0.987934	-0.751104	0.749639	-1.90296	0.948416	-0.685227	0.68878	-1.90866	0.915979	Q9UIG0	Tyrosine-protein kinase BAZ1B	BAZ1B	RKPSKKSKTDNSSLSSPLNPKLWCHVHLKKS	330
-0.478168	0.476394	-0.852613	0.730734	-0.626016	0.618866	-1.09292	1.09815	-0.534541	0.536753	-0.954652	0.891864	0.996881	Q9UIG0	Tyrosine-protein kinase BAZ1B	BAZ1B	PKLWCHVHLKKSLSGSPLKVKNSKNSKSPEE	349
-1.21259	1.21082	-1.20363	1.75375	-1.10459	1.01067	-1.01214	1.68738	-0.175215	0.177426	-0.224769	0.339179	0.980908	Q9UJ41	Rab5 GDP/GTP exchange factor	RABGEF1	IQEAKAPSPSINRQTSIETDRVSKEFIEFLK	132
-0.273807	0.115887	-0.104633	0.16539	-0.256638	0.131493	-0.132957	0.385584	-0.0937272	0.17366	-0.107651	0.0923859	0.999768	Q9UJ70	N-acetyl-D-glucosamine kinase	NAGK	GVDPLVPLRSLGLSLSGGDQEDAGRILIEEL	76
-0.77934	0.223367	-0.212113	0.354757	-0.67468	0.0494622	-0.0509268	0.151935	-0.203469	0.0274202	-0.0238671	0.13399	0.935349	Q9UJF2	Ras GTPase-activating protein nGAP	RASAL2	TVPDRHIPLALPRQNSTGQAQIRKVDQGGLG	864
0.357526	-0.0771076	0.0883617	-0.365482	0.0651758	0.115409	-0.198675	-0.0626969	0.128119	-0.125907	-0.151204	0.201094	0.999997	Q9UJF2	Ras GTPase-activating protein nGAP	RASAL2	QNGSRSRQQSSSSRESPVPKVRAIQRQQTQQ	928
-0.34654	-0.100237	0.111492	1.06162	-0.59129	-0.249377	0.247913	0.515316	-0.0788286	-0.129231	0.0765591	0.261196	0.925273	Q9UJK0	Ribosome biogenesis protein TSR3 homolog	TSR3	ASEDPGPGAERGGASSSCCEEEQTQGRGAEA	281
2.002	-1.24183	1.25308	-3.02108	1.59491	-1.09162	1.09016	-3.42827	1.53888	-0.882818	0.886371	-1.67064	0.962037	Q9UJU6	Drebrin-like protein	DBNL	IFKQKERAMSTTSISSPQPGKLRSPFLQKQL	275
1.0663	-0.141037	0.152291	-0.996125	0.750528	-0.607319	0.605854	-2.02594	1.17294	-0.73766	0.738686	-0.738686	1	Q9UJU6	Drebrin-like protein	DBNL	AARREQRYQEQGGEASPQRTWEQQQEVVSRN	232
0.4511	-0.391162	0.402416	-0.498606	-0.0553042	-0.0547344	0.188181	0.0476628	0.324438	-0.297042	0.300595	-0.51368	1	Q9UK59	Lariat debranching enzyme	DBR1	SGNGEDLTKVPLKRLSDEHEPEQRKKIKRRN	514
-0.168302	0.166528	-0.363653	0.308992	-0.0112399	0.00409	-0.3714	0.199076	-0.138505	0.106946	-0.103393	0.418285	0.999999	Q9UK61	Protein FAM208A	FAM208A	IIIKASAKGGNLPPVSPNDSGAKIASNPLER	1103
0.0443572	-0.137591	-0.0547758	0.0481059	0.0323614	-0.111842	-0.0242754	0.283937	0.0653718	-0.0973217	0.118689	-0.0667131	0.988803	Q9UK61	Protein FAM208A	FAM208A	EIHWKLIPITGGNARSPEDQLGKHGEKQTPG	927
-0.269049	-0.401663	2.78635	0.247936	-0.00455987	-0.136263	4.02422	0.00703884	-0.777204	-0.189382	2.57283	0.193863	0.984091	Q9UK76	Hematological and neurological expressed 1 protein;Hematological and neurological expressed 1 protein, N-terminally processed	HN1	SAGAKSSGGREDLESSGLQRRNSSEASSGDF	80
1.63739	-1.48749	1.49874	-2.72173	1.8154	-1.47729	1.47582	-2.69839	1.52287	-0.269287	0.27284	-1.40869	0.966855	Q9UK76	Hematological and neurological expressed 1 protein;Hematological and neurological expressed 1 protein, N-terminally processed	HN1	TTTTTFKGVDPNSRNSSRVLRPPGGGSNFSL	17
-0.0323513	0.565603	-0.0205032	0.0112379	0.269096	-0.0909279	0.0874411	-0.0792768	-0.0517539	0.0539657	-0.474806	0.188168	0.999771	Q9UK76	Hematological and neurological expressed 1 protein;Hematological and neurological expressed 1 protein, N-terminally processed	HN1	GGREDLESSGLQRRNSSEASSGDFLDLKGEG	87
0.204092	0.0499187	-0.0386646	-0.112149	0.0620852	-0.265144	0.101785	-0.0596062	0.119757	-0.0758967	-0.922433	0.0803779	0.947688	Q9UK76	Hematological and neurological expressed 1 protein;Hematological and neurological expressed 1 protein, N-terminally processed	HN1	GREDLESSGLQRRNSSEASSGDFLDLKGEGD	88
0.240743	-0.694331	0.325148	-0.261856	0.33141	-0.33856	0.364159	-0.576178	0.265299	-0.263087	0.379838	-0.425692	0.992808	Q9UKG1	DCC-interacting protein 13-alpha	APPL1	TAARVNQSALEAVTPSPSFQQRHESLRPAAG	401
0.0623025	-0.673883	0.271685	-0.083416	-0.0305497	-1.65089	0.79556	0.0330287	0.164086	-0.476007	0.602715	-0.165427	0.988383	Q9UKI8	Serine/threonine-protein kinase tousled-like 1	TLK1	SSRGRKRKAENQNESSQGKSIGGRGHKISDY	134
-0.0985964	0.744396	-0.118732	0.077483	-0.148019	0.780071	-0.172151	0.150498	-0.0868748	0.560535	-0.479892	0.0855335	0.999875	Q9UKJ3	G patch domain-containing protein 8	GPATCH8	QNSNIGTGRGSEGDCSPEDKNSVTAKLLLEK	1081
-0.381392	0.379618	-0.567065	0.567834	-0.452769	0.445619	-0.746048	0.680438	-0.213301	0.555606	-0.504918	0.211959	0.999691	Q9UKJ3	G patch domain-containing protein 8	GPATCH8	ACSGLNKQEPGGSHGSETEDTGRSLPSKKER	653
-0.142468	0.140694	-0.190792	0.41442	0.0940522	-0.103147	0.0347446	-0.0265803	0.102143	-0.0692413	0.0317649	-0.0317649	1	Q9UKM9	RNA-binding protein Raly	RALY	RDDFYDRLFDYRGRLSPVPVPRAVPVKRPRV	135
0.172935	-0.174709	1.70758	-1.35154	0.248765	-0.120611	-0.106567	0.113539	-0.0176387	0.0198505	-0.134526	0.0425459	1	Q9UKN8	General transcription factor 3C polypeptide 4	GTF3C4	LWKPTHEDSKILLVDSPGMGNADDEQQEEGT	611
-0.871834	0.399648	-0.388394	0.701454	-2.21187	0.615635	-0.6171	0.981201	-0.853509	0.493049	-0.489496	1.15884	0.999999	Q9UKV3	Apoptotic chromatin condensation inducer in the nucleus	ACIN1	ERRSSRVRQARAAKLSEGSQPAEEEEDQETP	240
1.83484	-1.83661	1.87883	-2.64509	0.667919	-0.661297	0.659833	-0.842095	0.987632	-0.985421	1.00947	-1.89576	0.983966	Q9UKV3	Apoptotic chromatin condensation inducer in the nucleus	ACIN1	PPVPQLQVCEPKERTSTSSSSVQARRLSQPE	698
-0.0258413	-1.22651	0.0154227	0.359852	-0.0922147	-0.212295	0.100301	0.532671	0.0319774	-0.0739087	-0.0342468	0.474124	0.999314	Q9UKV3	Apoptotic chromatin condensation inducer in the nucleus	ACIN1	KISVVSATKGVPAGNSDTEGGQPGRKRRWGA	838
-0.544121	0.47366	-0.462406	0.750219	-0.725128	0.202226	-0.20369	0.449821	-0.481724	0.463509	-0.459956	0.738685	1	Q9UKV3	Apoptotic chromatin condensation inducer in the nucleus	ACIN1	SAEKHVTQRLQPERGSPKKCEAEEAEPPAAT	729
0.0930852	-0.559576	-0.00349292	-0.00459232	0.0530601	-0.293483	-0.0449741	0.0881024	0.173668	-0.484403	-0.0837733	0.0837733	1	Q9UKV3	Apoptotic chromatin condensation inducer in the nucleus	ACIN1	ERTSTSSSSVQARRLSQPESAEKHVTQRLQP	710
-0.645472	0.55444	-0.257274	0.249188	-0.302053	0.207979	-0.209444	0.608689	-0.300874	0.303086	-0.705525	0.465377	1	Q9UKV3	Apoptotic chromatin condensation inducer in the nucleus	ACIN1	HSPRKSSSISEEKGDSDDEKPRKGERRSSRV	216
-0.419917	0.418143	-0.469315	0.491892	-0.322517	0.315367	-0.40556	0.528002	0.00412554	-0.00191378	-0.119139	0.723761	1	Q9UKV3	Apoptotic chromatin condensation inducer in the nucleus	ACIN1	VSITIDDPVRTAQVPSPPRGKISNIVHISNL	1004
1.08907	-0.992963	1.00422	-1.10611	1.23793	-1.24508	1.2947	-1.91196	0.877318	-1.0522	0.76612	-0.76612	0.985189	Q9UKX7	Nuclear pore complex protein Nup50	NUP50	RNSESESNKVAAETQSPSLFGSTKLQQESTF	221
0.439803	-0.150933	0.162187	-0.34294	0.436161	-0.249021	0.247557	-0.588053	-0.0376479	0.0398597	-0.125478	0.10453	0.999957	Q9ULH1	Arf-GAP with SH3 domain, ANK repeat and PH domain-containing protein 1	ASAP1	QQPSEVTLKSHPLDLSPNVQSRDAIQKQASE	1027
-1.46885	1.13766	-1.12641	2.47396	-0.840677	0.833528	-0.911024	2.12021	-1.34434	1.26365	-1.2601	2.30726	0.997648	Q9ULL5	Proline-rich protein 12	PRR12	PNSEGKDPAGAYRSPSPQGTKAPRFVPLTSI	917
-0.547131	0.545357	-0.566723	0.580901	-0.549826	0.542676	-0.660781	0.634503	-0.458237	0.605636	-0.64082	0.456896	1	Q9ULM3	YEATS domain-containing protein 2	YEATS2	SSCKIVPQSQVPNPESPGKSFQPITMSCKIV	447
-1.84092	1.60003	-1.58878	1.62464	-1.98493	1.39329	-1.39475	1.56136	-1.23655	1.207	-1.20344	1.29706	0.998618	Q9ULM3	YEATS domain-containing protein 2	YEATS2	KQPGQVIGATTPSTGSPTNKISTASQVSQGT	519
-0.959962	0.471721	-0.460467	1.04308	-1.00064	0.447424	-0.448889	1.05571	-1.10056	0.558861	-0.555308	0.892727	0.994198	Q9ULT8	E3 ubiquitin-protein ligase HECTD1	HECTD1	SAGSTGRIPGLRRLDSSGERSHRQLIDCIRS	357
-0.241818	0.0426849	-0.0314308	0.543842	0.600289	-0.607439	1.24219	-0.609056	-0.0677427	0.0679704	-0.0644173	0.355054	0.98387	Q9ULT8	E3 ubiquitin-protein ligase HECTD1	HECTD1	ARTNATNNMNLSRSSSDNNTNTLGRNVMSTA	1571
-0.443047	0.441273	-1.59172	0.438155	-0.412402	0.405252	-1.49661	0.593672	-0.318625	0.371334	-1.1921	0.317284	0.999954	Q9ULU4	Protein kinase C-binding protein 1	ZMYND8	SASEESMDFLDKSTASPASTKTGQAGSLSGS	475
-0.398213	0.225406	-0.0745388	0.0664535	-0.413277	0.0969403	-0.098405	0.106709	-0.281629	0.181374	-0.00419512	0.00419512	0.983753	Q9ULU4	Protein kinase C-binding protein 1	ZMYND8	KPTNPVEIKEELKSTSPASEKADPGAVKDKA	652
0.0092307	0.547244	-0.124333	-0.0303441	0.00417561	0.657913	-0.08521	-0.00169664	-0.233545	0.375163	0.0601839	-0.0601839	0.907927	Q9ULV3	Cip1-interacting zinc finger protein	CIZ1	GHFENLQKYKAAKNPSPTTRPVSRRCAINAR	838
-0.352447	0.577944	-0.372398	0.331333	-0.302245	0.482769	-0.422161	0.304724	-0.195958	0.478314	-0.341927	0.194616	0.989204	Q9ULW0	Targeting protein for Xklp2	TPX2	EEGSAHQDTAEKNASSPEKAKGRHTVPCMPP	186
0.0137096	-0.0154837	0.062385	-0.968848	0.0970676	0.135474	-0.0889817	-1.22907	0.110184	0.0368596	-0.0333065	-1.24921	0.99997	Q9ULW0	Targeting protein for Xklp2	TPX2	GLEIKSSDQPLTVPVSPKFSTRFHC______	738
0.191958	-0.193732	0.23252	-0.258753	0.100311	-0.107461	0.323718	-0.348953	0.201878	-0.199666	0.361385	-0.467138	1	Q9ULX6	A-kinase anchor protein 8-like	AKAP8L	TADFRTKKKKRKQGGSPDEPDSKATRTDCSD	283
1.83425	-1.83602	1.90718	-2.07773	1.28542	-1.29257	1.3886	-1.72289	0.363414	-0.42667	0.486254	-0.364756	0.999986	Q9UM00	Transmembrane and coiled-coil domain-containing protein 1	TMCO1	KQSKKLEKKKETITESAGRQQKKKIERQEEK	111
0.0226918	-0.0244659	0.178535	-0.778275	-0.0203985	0.0132486	0.0812917	-0.695504	-0.00468492	0.00689668	0.0535639	-0.690582	0.997693	Q9UM11	Fizzy-related protein homolog	FZR1	ANWSVNFHRINENEKSPSQNRKAKDATSDNG	70
0.0123799	0.366694	-0.0227985	-0.0851266	-0.399285	0.392135	-0.536691	0.434137	-0.114438	0.11665	-0.229832	0.17589	1	Q9UMN6	Histone-lysine N-methyltransferase 2B	KMT2B	DESVEAKRERPSGPESPVQGPRIKHVCRHAA	861
-0.276577	0.152368	-0.141114	0.546718	-0.276329	0.0939934	-0.095458	0.506112	0.0474203	-0.08413	0.344038	-0.0487616	0.999992	Q9UN30	Sex comb on midleg-like protein 1	SCML1	ESYSPTLPVSRRENNSPSNLPRPSFCMEEYQ	150
-0.346085	0.344311	-0.473364	0.381915	-0.366235	0.359085	-0.579558	0.452254	-0.412132	0.414344	-0.516344	0.416211	0.991106	Q9UN37	Vacuolar protein sorting-associated protein 4A	VPS4A	KKPVKENQSEGKGSDSDSEGDNPEKKKLQEQ	97
-0.410987	0.575001	-0.429204	0.389873	-0.284636	0.277486	-0.475005	0.366217	-0.358934	0.513484	-0.913482	0.357593	1	Q9UNE7	E3 ubiquitin-protein ligase CHIP	STUB1	KEEKEGGARLGAGGGSPEKSPSAQELKEQGN	19
-0.477937	0.426215	-0.286762	0.278677	-0.84968	0.196354	-0.197818	0.693971	-0.45073	0.196605	-0.193052	0.368186	0.882676	Q9UNF1	Melanoma-associated antigen D2	MAGED2	KARKVKHLDGEEDGSSDQSQASGTTGGRRVS	191
-0.617796	0.492437	-0.481183	1.16968	-0.68138	0.608297	-0.609762	1.40105	-0.540377	0.453289	-0.449736	0.973922	0.994974	Q9UNF1	Melanoma-associated antigen D2	MAGED2	ARRGKARRRAAKLQSSQEPEAPPPRDVALLQ	265
-0.387301	-0.270635	0.50583	0.271194	-0.522961	-0.400507	0.841596	0.393436	-0.695272	-0.244807	0.24836	0.286862	1	Q9UNL2	Translocon-associated protein subunit gamma	SSR3	QKREDAVSKEVTRKLSEADNRKMSRKEKDER	105
-0.447302	0.445528	-0.6048	0.666628	0.163467	-0.170616	-0.741459	0.445927	-0.549936	0.552148	-0.624308	0.72748	1	Q9UNS1	Protein timeless homolog	TIMELESS	KEPLKAAPKKRQLLDSDEEQEEDEGRNRAPE	1173
0.296462	-0.25076	0.262014	-1.29499	-0.348823	0.535901	-0.340809	0.348973	-0.355547	0.283801	-0.280248	0.826693	0.839512	Q9UNS2	COP9 signalosome complex subunit 3	COPS3	QEITVNPQFVQKSMGSQEDDSGNKPSSYS__	410
0.253783	-0.255557	0.44363	-1.48866	0.178036	-0.185186	0.42317	-1.17917	0.35038	-0.348168	0.598081	-1.52604	0.997569	Q9UNS2	COP9 signalosome complex subunit 3	COPS3	MGSQEDDSGNKPSSYS_______________	423
0.162206	-0.132074	0.143328	-0.53714	0.301682	-0.0198839	0.0184193	-0.499198	-0.442746	0.798723	0.440477	-2.46057	0.914556	Q9UNX4	WD repeat-containing protein 3	WDR3	IEDPEEPDPKKIKGSSPGIQDTLEAEDGAFE	241
0.570149	-0.796637	0.374	-0.382085	1.11081	-0.829172	0.827707	-1.93737	1.19601	-0.859563	0.863116	-1.98038	1	Q9UNY4	Transcription termination factor 2	TTF2	SYLKRHESRGNQSGRSPNNPFSRVALEFGSE	883
1.53745	-1.53923	1.72944	-2.74232	1.34272	-1.34987	1.51012	-2.69545	1.27846	-1.27625	1.46626	-1.7233	0.920698	Q9UNZ2	NSFL1 cofactor p47	NSFL1C	GQKLGSTAPQVLSTSSPAQQAENEAKASSSI	272
0.229228	-0.231002	0.247198	-1.25926	0.195812	-0.168281	0.166816	-0.994299	0.085879	-0.0836672	0.201451	-1.03247	0.999985	Q9UNZ2	NSFL1 cofactor p47	NSFL1C	GAKEHGAVAVERVTKSPGETSKPRPFAGGGY	140
0.646431	-0.446758	0.458012	-1.08646	0.799991	-0.777296	0.775832	-1.08132	0.859082	-0.786889	0.790442	-1.3302	1	Q9UPN3	Microtubule-actin cross-linking factor 1, isoforms 1/2/3/5	MACF1	QAESNKAFLAELEQNSPKIQKVKEALAGLLV	4521
0.120774	-0.138468	0.251555	-0.141888	0.0264687	-0.234422	0.199038	-0.0239897	-0.00148564	-0.458117	-0.000783814	0.119397	0.996901	Q9UPN3	Microtubule-actin cross-linking factor 1, isoforms 1/2/3/5	MACF1	WLREVEEELATSGGQSPTGEQIPQFQQRQKE	5592
-0.356979	0.270867	-0.259613	0.555169	-0.359117	0.144068	-0.145532	0.444197	-0.00213902	0.00435079	-0.500781	0.223563	0.797965	Q9UPN3	Microtubule-actin cross-linking factor 1, isoforms 1/2/3/5	MACF1	GSSPETLPSLLKRQGSFSEDVISHKGDLRFV	3927
0.697828	-0.699602	0.779306	-0.978279	1.19829	-1.20544	1.32313	-4.17012	1.37153	-1.21319	1.21675	-1.60005	0.987648	Q9UPN3	Microtubule-actin cross-linking factor 1, isoforms 1/2/3/5	MACF1	HSSRTSLAGDTSNSSSPASTGAKTNRADPKK	7292
0.938843	-1.35763	0.465032	-0.473118	0.929539	-0.825082	0.800798	-0.792634	1.44592	-1.20266	1.20622	-2.22322	0.973261	Q9UPN3	Microtubule-actin cross-linking factor 1, isoforms 1/2/3/5	MACF1	SSPATPASGTKVIPSSGSKLKRPTPTFHSSR	7265
-1.01185	0.706143	-0.694889	1.01934	-0.451139	0.474981	-0.782756	0.453618	-0.750987	0.753198	-0.801053	1.0951	0.966611	Q9UPN4	Centrosomal protein of 131 kDa	CEP131	GPGGSQAINNLRRSNSTTQVSQPRSGSPRPT	78
-0.168192	0.166417	-0.178431	0.348031	0.0314003	-0.0250303	-0.088554	0.0179587	-0.0687949	0.294838	-0.000127301	0.000127301	0.999008	Q9UPN6	Protein SCAF8	SCAF8	VKSSEPVKETVQTTQSPTPVEKETVVTTQAE	617
-1.86537	1.87935	-2.07458	1.84426	-1.99397	1.89968	-1.90115	2.07448	-2.43755	2.6245	-2.3892	2.3892	0.999948	Q9UPP1	Histone lysine demethylase PHF8	PHF8	RSSGSSSSGLGTVSNSPASQRTPGKRPIKRP	804
-0.0967832	0.915388	-2.23827	0.0756698	-0.190274	0.780829	-1.84108	0.192753	-0.0101825	0.478171	-0.297119	0.00884118	0.991665	Q9UPQ0	LIM and calponin homology domains-containing protein 1	LIMCH1	ARASVLDTSMSAGSGSPSKTVTPKAVPMLTP	523
-0.800605	0.949368	-1.91812	0.779491	-0.943638	0.936488	-1.14141	1.06671	-0.737774	0.887907	-1.34135	0.736432	0.999938	Q9UPQ0	LIM and calponin homology domains-containing protein 1	LIMCH1	FDSLDSFGSRSRQTPSPDVVLRGSSDGRGSD	217
0.198813	-0.200587	-0.454463	0.251957	0.555823	0.00436345	-0.624377	-0.0114351	0.144855	0.202515	-0.601397	-0.146196	0.988069	Q9UPQ0	LIM and calponin homology domains-containing protein 1	LIMCH1	DKWQDDLARWKSRRRSVSQDLIKKEEERKKM	377
-0.322191	0.320417	-0.539768	0.871088	-0.4109	0.38053	-0.381995	0.903914	-0.411691	0.413903	-0.60159	0.811809	0.999999	Q9UPR3	Protein SMG5	SMG5	______________MSQGPPTGESSEPEAKV	2
1.94811	-1.91458	1.92584	-2.15612	1.37549	-1.4807	1.08492	-1.07675	0.903405	-1.3475	0.751243	-0.751243	0.999602	Q9UPT8	Zinc finger CCCH domain-containing protein 4	ZC3H4	AASLKDVFKGFDPTASPFCQ___________	1299
-0.638064	0.63629	-0.698189	0.850888	-2.2728	1.45839	-1.45985	1.90098	-1.70308	1.2566	-1.25305	1.61516	1	Q9UPT8	Zinc finger CCCH domain-containing protein 4	ZC3H4	KQTPKTGSGSPFAGNSPAREGEQDAASLKDV	1275
-2.47293	2.23084	-2.08977	2.08168	-1.96979	1.57891	-1.58038	2.05389	-0.794279	0.720782	-0.717229	1.38699	0.986222	Q9UPU5	Ubiquitin carboxyl-terminal hydrolase 24	USP24	EAEDLSLSAPSSPEISPQSSPRPHRPNNDRL	2077
-0.277803	0.450074	-0.293136	0.25669	-0.405602	0.398452	-0.54541	0.534312	-0.219359	0.221571	-0.275632	0.227508	1	Q9UPU5	Ubiquitin carboxyl-terminal hydrolase 24	USP24	EVGENGRSVDQGGGGSPRKKVALTENYELVG	1943
-0.35693	0.34283	-0.331576	0.468119	-0.292046	0.173333	-0.174797	0.477473	-0.29247	0.294682	-0.345819	0.488638	0.999966	Q9UPU5	Ubiquitin carboxyl-terminal hydrolase 24	USP24	WNAYMLFYQRVSDQNSPVLPKKSRVSVVRQE	2047
-0.624219	0.622445	-0.666298	0.704303	-0.437325	0.39919	-0.400655	0.702147	-0.601644	0.575067	-0.571514	0.674134	0.999976	Q9UQ35	Serine/arginine repetitive matrix protein 2	SRRM2	;PSAPSQSRMTSERAPSPSSRMGQAPSQSLLP	2426
-1.27391	1.27214	-1.49033	1.4911	-1.08738	1.08023	-1.61765	1.51328	-1.1843	1.18651	-1.45607	1.35753	0.975528	Q9UQ35	Serine/arginine repetitive matrix protein 2	SRRM2	DKPRAAPRAQSGSDSSPEPKAPAPRALPRRS	1621
-0.844207	0.558836	-0.547582	1.04274	-0.374251	0.367101	-0.571632	0.859052	-0.378122	0.380334	-0.538666	0.95192	1	Q9UQ35	Serine/arginine repetitive matrix protein 2	SRRM2	FSRPSMSPTPLDRCRSPGMLEPLGSSRTPMS	2132
-0.424307	0.51292	-0.808404	0.403194	-0.466493	0.459343	-0.711474	0.479058	-0.321131	0.378069	-0.0660758	0.0660758	0.999984	Q9UQ35	Serine/arginine repetitive matrix protein 2	SRRM2	KDKDKKEKSATRPSPSPERSSTGPEPPAPTP	353
-0.871962	0.870188	-1.80634	1.0572	-0.916596	0.909446	-1.83306	1.33676	-0.802061	0.926896	-2.06102	0.80072	0.99999	Q9UQ35	Serine/arginine repetitive matrix protein 2	SRRM2	WGGPHFSPEHKELSNSPLRENSFGSPLEFRN	1320
0.198094	0.880174	-1.23386	-0.219207	0.121021	0.561799	-1.59744	-0.118542	0.157437	0.859145	-1.43202	-0.158778	0.999994	Q9UQ35	Serine/arginine repetitive matrix protein 2	SRRM2	HKELSNSPLRENSFGSPLEFRNSGPLGTEMN	1329
0.00157285	0.0582182	-0.0119914	-0.18984	0.244963	-0.37008	0.290514	-0.242484	-0.1592	0.0716643	-0.0681113	0.387486	0.99992	Q9UQ35	Serine/arginine repetitive matrix protein 2	SRRM2	SPELNNKCLTPQRERSGSESSVDQKTVARTP	1517
-0.480796	0.362569	-0.351315	0.53865	-0.254779	0.15808	-0.159544	0.65647	-0.174686	0.0711301	-0.0675771	0.314294	0.978676	Q9UQ35	Serine/arginine repetitive matrix protein 2	SRRM2	ELNNKCLTPQRERSGSESSVDQKTVARTPLG	1519
-1.05222	1.05044	-1.14513	2.56467	-1.1237	1.0517	-1.05317	2.85325	-1.73971	1.63781	-1.63425	3.10112	0.998138	Q9UQ35	Serine/arginine repetitive matrix protein 2	SRRM2	VLDAVPRTPSRERSSSASSPEMKDGLPRTPS	1421
-0.860206	1.18476	-1.22508	0.839093	-0.906674	0.899524	-1.31412	0.978887	-0.899506	0.955623	-1.13276	0.898164	0.999525	Q9UQ35	Serine/arginine repetitive matrix protein 2	SRRM2	AVPRTPSRERSSSASSPEMKDGLPRTPSRRS	1424
-0.178768	0.742644	-0.194071	0.157655	-0.112262	0.235062	-0.251603	0.114741	-0.234701	0.299954	-0.14885	0.14885	1	Q9UQ35	Serine/arginine repetitive matrix protein 2	SRRM2	ASRSPIRQDRGEFSASPMLKSGMSPEQSRFQ	1124
-0.772652	0.770878	-0.801751	0.852195	-0.83015	0.781599	-0.783063	0.993885	-0.752156	0.776785	-0.680083	0.680083	0.988258	Q9UQ35	Serine/arginine repetitive matrix protein 2	SRRM2	APFSEPGTTSTQRPSSPETATKQPSSPYEDK	323
-0.820382	0.760829	-0.749575	1.02614	-0.933067	0.847146	-0.84861	1.30712	-0.693855	0.696066	-0.694879	0.92457	1	Q9UQ35	Serine/arginine repetitive matrix protein 2	SRRM2	DIPRTPSRGRSECDSSPEPKALPQTPRPRSR	1483
-0.281708	0.275554	-0.180756	0.172671	-0.27287	0.144229	-0.145693	0.387129	-0.32472	0.252645	-0.245876	0.245876	0.993834	Q9UQ35	Serine/arginine repetitive matrix protein 2	SRRM2	SKEKMALPPQEDATASPPRQKDKFSPFPVQD	1179
0.803058	-0.627974	0.639228	-1.69393	0.705002	-0.421018	0.419553	-1.72133	0.507006	-0.502147	0.5057	-1.62947	0.99585	Q9UQ35	Serine/arginine repetitive matrix protein 2	SRRM2	TSARMAPALSGANLTSPRVPLSAYERVSGRT	2382
-0.263985	0.560391	-0.318091	0.242871	-0.283284	0.276134	-0.420796	0.474278	-0.387588	0.3898	-0.537799	0.42303	0.999973	Q9UQ35	Serine/arginine repetitive matrix protein 2	SRRM2	APSQSLLPPAQDQPRSPVPSAFSDQSRCLIA	2449
-0.854253	0.852479	-0.912572	0.840431	-0.493818	0.387812	-0.389277	0.562694	-0.512518	0.47492	-0.471367	0.557953	1	Q9UQ35	Serine/arginine repetitive matrix protein 2	SRRM2	RDKSHSHTPSRRMGRSRSPATAKRGRSRSRT	484
-0.772759	0.921004	-0.791362	0.751646	-0.742249	0.33442	-0.335884	0.713287	-0.743253	0.846738	-0.409787	0.409787	0.980065	Q9UQ35	Serine/arginine repetitive matrix protein 2	SRRM2	ALNSSRMSCFSRPSMSPTPLDRCRSPGMLEP	2123
-1.47655	1.08056	-0.561975	0.55389	-0.678717	0.441458	-0.442923	0.777591	-0.388708	0.39092	-0.389871	0.400694	0.999015	Q9UQ35	Serine/arginine repetitive matrix protein 2	SRRM2	PKVKSGTPPRQGSITSPQANEQSVTPQRRSC	857
-0.469657	0.622389	-0.449757	0.441672	-0.50855	0.501401	-0.524265	0.567984	-0.893636	1.0276	-1.13624	0.892295	0.997013	Q9UQ35	Serine/arginine repetitive matrix protein 2	SRRM2	TQRPSSPETATKQPSSPYEDKDKDKKEKSAT	333
-0.30564	0.837991	-0.2342	0.226115	-0.502426	0.627639	-0.509041	0.504905	-0.188887	0.746255	-0.160869	0.160869	0.999974	Q9UQ35	Serine/arginine repetitive matrix protein 2	SRRM2	RSDTSSPEVRQSHSESPSLQSKSQTSPKGGR	1083
-0.494532	0.382739	-0.371485	0.795547	-0.425724	0.409422	-0.410886	0.597582	-0.317909	0.184849	-0.181296	0.232393	0.998778	Q9UQ35	Serine/arginine repetitive matrix protein 2	SRRM2	VKPETPPRQSHSGSISPYPKVKAQTPPGPSL	994
-0.745784	0.61657	-0.605316	1.6163	-0.501835	0.494685	-0.591671	0.933402	-0.261577	0.263789	-0.335564	0.274657	1	Q9UQ35	Serine/arginine repetitive matrix protein 2	SRRM2	DSRSLSYSPVERRRPSPQPSPRDQQSSSSER	2702
-1.13283	1.44467	-1.70543	1.11172	-0.990258	1.17439	-1.37287	0.992737	-0.846303	1.27213	-1.37085	0.844962	0.994249	Q9UQ35	Serine/arginine repetitive matrix protein 2	SRRM2	PKTKSRTPPRRRSSRSSPELTRKARLSRRSR	1693
-0.578776	0.518305	-0.507051	0.600126	-0.448791	0.441641	-0.512276	0.703225	-0.400282	0.650459	-0.566111	0.39894	0.991399	Q9UQ35	Serine/arginine repetitive matrix protein 2	SRRM2	NEQSVTPQRRSCFESSPDPELKSRTPSRHSC	876
-1.2538	1.25203	-1.63409	1.44386	-1.34426	1.33711	-1.84966	1.75473	-1.22161	1.22382	-1.44562	1.31629	0.989923	Q9UQ35	Serine/arginine repetitive matrix protein 2	SRRM2	VKPSASPQERSESDSSPDSKAKTRTPLRQRS	1562
-0.467652	0.465716	-0.454461	0.52376	-0.279782	0.327584	-0.316804	0.282261	-0.171805	0.603468	-0.183153	0.170464	0.999845	Q9UQ35	Serine/arginine repetitive matrix protein 2	SRRM2	DTLRTPPRERSGAGSSPETKEQNSALPTSSQ	1219
-0.706337	0.743552	-1.00218	0.685224	-0.474391	0.467241	-0.99435	0.593829	-0.671112	0.753391	-1.23426	0.66977	0.999815	Q9UQ35	Serine/arginine repetitive matrix protein 2	SRRM2	DSKSRLSPRRSRSGSSPEVKDKPRAAPRAQS	1601
-0.75239	0.99365	-1.18573	0.731277	-0.785334	0.778184	-1.05468	1.23617	-0.644828	0.792684	-1.10353	0.643487	0.946464	Q9UQ35	Serine/arginine repetitive matrix protein 2	SRRM2	DGLPRTPSRRSRSGSSPGLRDGSGTPSRHSL	1444
-0.677863	0.676089	-1.11691	1.03617	-0.645136	0.637986	-1.2429	1.1406	-0.07542	0.483288	-0.744946	0.0740787	0.999959	Q9UQ35	Serine/arginine repetitive matrix protein 2	SRRM2	SRSGSSQELDVKPSASPQERSESDSSPDSKA	1552
-0.109046	0.643011	0.0986279	-0.337045	-0.399466	0.0509257	-0.0442893	0.0524536	0.152197	-0.149985	0.181817	-0.506539	0.999905	Q9UQ35	Serine/arginine repetitive matrix protein 2	SRRM2	PCPKQKSQTPPRRSRSGSSQPKAKSRTPPRR	799
-0.612692	0.519976	-0.508721	0.874129	-0.825435	0.457537	-0.459002	0.73934	-0.797419	0.609386	-0.433602	0.433602	1	Q9UQ35	Serine/arginine repetitive matrix protein 2	SRRM2	GRSRSSSPVTELASRSPIRQDRGEFSASPML	1112
1.3094	-0.645822	0.657076	-1.58325	1.17174	-0.585038	0.583573	-1.18237	1.55861	-0.98836	0.697111	-0.697111	0.996189	Q9UQ35	Serine/arginine repetitive matrix protein 2	SRRM2	KALPQTPRPRSRSPSSPELNNKCLTPQRERS	1502
-0.496935	0.60749	-0.48449	0.475821	-0.686959	0.593776	-0.595241	0.88142	-1.38268	0.210423	-0.20687	1.43781	0.999453	Q9UQ35	Serine/arginine repetitive matrix protein 2	SRRM2	RSRSRTSPITRRRSRSRTSPVTRRRSRSRTS	1984
-0.418511	0.416736	-0.486103	0.604728	-0.358413	0.214815	-0.216279	0.696165	-0.170992	0.173204	-0.266466	0.551128	0.993109	Q9UQ35	Serine/arginine repetitive matrix protein 2	SRRM2	SKSQTSPKGGRSRSSSPVTELASRSPIRQDR	1103
-0.807033	0.682264	-0.67101	0.746802	-0.624379	0.617229	-1.02749	0.892998	-0.760106	0.777732	-1.10615	0.758765	0.998738	Q9UQ35	Serine/arginine repetitive matrix protein 2	SRRM2	VKSSTPPRQSPSRSSSPQPKVKAIISPRQRS	914
0.459616	-0.274802	0.286056	-1.0257	0.335644	-0.285655	0.28419	-0.311832	0.388648	-0.351581	0.355135	-1.25853	1	Q9UQ35	Serine/arginine repetitive matrix protein 2	SRRM2	ADSRTPAAAAAMNLASPRTAVAPSAVNLADP	2272
-0.422611	0.420837	-0.798173	0.685233	-0.49159	0.48444	-0.518495	0.741957	-0.243276	0.122305	-0.118752	0.382592	0.935136	Q9UQ35	Serine/arginine repetitive matrix protein 2	SRRM2	PRVPLSAYERVSGRTSPPLLDRARSRTPPSA	2398
-1.19312	0.881164	-0.86991	1.01789	-1.18108	0.823426	-0.82489	1.31768	-0.607413	0.383601	-0.380048	0.818857	0.917097	Q9UQ35	Serine/arginine repetitive matrix protein 2	SRRM2	NVESRLLPRYSHSGSSSPDTKVKPETPPRQS	973
1.26756	-1.26933	2.10997	-2.02067	1.08042	-1.08757	2.04689	-1.82227	0.513902	-0.704077	1.39981	-0.515244	0.999118	Q9UQ80	Proliferation-associated protein 2G4	PA2G4	EMEVQDAELKALLQSSASRKTQKKKKKKASK	361
0.652077	0.329097	-0.317843	-1.06704	0.267667	-0.0765966	-0.26979	0.069525	0.616443	0.246801	-0.243248	-1.16639	0.98934	Q9UQB8	Brain-specific angiogenesis inhibitor 1-associated protein 2	BAIAP2	YSPWADRKAAQPKSLSPPQSQSKLSDSYSNT	325
-0.125602	0.123828	-0.160912	0.198361	-0.127016	0.119866	-0.14949	0.411485	0.0781035	0.0414205	-0.0439138	-0.0369393	0.999991	Q9UQE7	Structural maintenance of chromosomes protein 3	SMC3	KATLVMKKGDVEGSQSQDEGEGSGESERGSG	1067
-0.118476	0.00200422	0.00924987	0.303545	-0.0908439	-0.189523	0.0989298	0.391967	-0.0708102	-0.0698439	0.0685407	0.385272	0.888744	Q9UQR1	Zinc finger protein 148	ZNF148	FPLVNVNDNRAGMTSSPDATTGQTFG_____	784
1.35859	-1.1282	1.13946	-1.63491	1.4049	-1.19093	1.18947	-2.07247	0.53006	-0.573363	0.301954	-0.301954	0.999822	Q9Y217	Myotubularin-related protein 6	MTMR6	TLLPVNDALRTIEGSSPADNRYSEYAEEFSK	589
0.0890096	-0.0907837	-0.515721	1.17289	0.113547	-0.120697	-0.618896	0.613463	-0.0974839	0.0996956	-0.990138	0.718379	0.999976	Q9Y248	DNA replication complex GINS protein PSF2	GINS2	MYKLRTNLQPLESTQSQDF____________	182
0.360792	-0.864856	0.233218	-0.241303	0.914332	-0.949885	0.593823	-0.585658	0.595017	-0.15836	0.161913	-0.255306	0.99999	Q9Y281	Cofilin-2	CFL2	_____________MASGVTVNDEVIKVFNDM	3
-0.373442	0.391602	-0.924247	0.352328	-0.413729	0.406579	-1.60747	0.474881	-0.288963	0.291175	-1.54364	0.365052	0.999553	Q9Y2D5	A-kinase anchor protein 2	AKAP2	SQPRDALGDSLQVPVSPSSTTSSRCSSRDGE	152
0.704806	0.124254	-0.268034	-0.123695	0.784051	0.155531	-0.480327	-0.162603	1.04564	0.0869448	-0.175372	-0.0824636	0.999984	Q9Y2D5	A-kinase anchor protein 2	AKAP2	GPPEDSGASAAKGQKSPGALETPSAAGSQGN	393
0.744107	0.0759593	-0.295414	-0.0754001	0.797974	0.216368	-0.656105	-0.22344	0.904898	0.127892	-0.623045	-0.123411	1	Q9Y2D5	A-kinase anchor protein 2	AKAP2	EEELKRQRQVLQSTQSPRTKNAPSLPSRTCY	748
0.363395	0.00237538	0.00887871	-0.194224	0.336135	0.0303221	-0.0940251	-0.0373938	0.311352	0.0333159	-0.0297629	-0.134421	0.999764	Q9Y2F5	Little elongation complex subunit 1	ICE1	IHKLTRGLCIERLSASPAQEKEAAPGKSELC	516
0.116684	0.0177198	-0.00646576	-1.10788	0.0862818	0.22047	-0.0781959	-1.43805	0.12459	0.259916	-0.126859	-0.912982	0.999999	Q9Y2F5	Little elongation complex subunit 1	ICE1	HLRPHRVEPTLVTENSGNKTGMSTVAKCDGE	892
-0.253823	0.0746601	-0.0634061	0.195506	-0.0917499	-0.157709	0.0998359	0.252742	-0.23436	-0.0618525	0.0654055	0.600086	0.993031	Q9Y2J4	Angiomotin-like protein 2	AMOTL2	QRQAGAPGGSSGSGGSPELSALRLSEQLREK	540
-0.760969	0.759195	-0.947116	1.00941	-0.479468	0.472318	-0.808165	1.0881	-1.79825	0.401489	-0.397936	0.528542	1	Q9Y2K7	Lysine-specific demethylase 2A	KDM2A	GGEEEEEEEEEEEDDSAEEGGAARLNGRGSW	869
-0.431256	-0.112695	2.26837	0.113254	-0.308489	-0.159232	1.25233	0.152161	-0.899811	-1.37285	3.78837	0.89847	1	Q9Y2U8	Inner nuclear membrane protein Man1	LEMD3	LAMNDRAAAAGSLDRSRNLEEAAAAEQGGGC	331
0.87942	-1.44122	0.663137	-0.671222	1.40983	-1.1815	1.18004	-3.28222	1.28047	-1.01957	1.02312	-2.52846	0.999843	Q9Y2U8	Inner nuclear membrane protein Man1	LEMD3	APPAPLAASEVTNSNSAERRKPHSWWGARRP	187
1.56689	-1.26383	1.27509	-3.55791	1.45591	-0.970923	0.969458	-3.37732	1.34323	-1.00519	1.00874	-2.43592	0.929746	Q9Y2U8	Inner nuclear membrane protein Man1	LEMD3	AAAAEQGGGCDQVDSSPVPRYRVNAKKLTPL	352
0.33454	-1.10078	0.433494	-0.355653	-0.140629	-0.291597	0.232664	0.143108	0.419731	-0.417519	0.783662	-0.502226	0.870707	Q9Y2U8	Inner nuclear membrane protein Man1	LEMD3	SHLRLRTGLTNSQGSS_______________	911
0.962873	-0.915978	0.927232	-1.47168	0.529861	-0.317965	0.316501	-0.460517	0.0583061	-0.237211	-0.0605756	0.181811	0.834421	Q9Y2U8	Inner nuclear membrane protein Man1	LEMD3	GSLLKTNNHIGGGAFSVDSPRIYSNSLPPSA	399
2.31477	-1.72952	1.74078	-2.76041	1.83859	-1.23118	1.22971	-2.58893	1.67843	-1.07458	1.07813	-1.75108	0.999849	Q9Y2V2	Calcium-regulated heat stable protein 1	CARHSP1	LPTRRTRTFSATVRASQGPVYKGVCKCFCRS	58
-0.741587	0.514838	-0.503584	0.537206	-0.735016	0.47844	-0.479905	0.621339	-0.0333081	0.277263	-0.00836559	0.00836559	1	Q9Y2V2	Calcium-regulated heat stable protein 1	CARHSP1	QASVGLLDTPRSRERSPSPLRGNVVPSPLPT	30
-0.145886	0.296903	-0.372823	0.124772	-0.0846868	0.373571	-0.0688488	0.0770131	-0.173237	0.380894	-0.349812	0.171895	0.999999	Q9Y2V2	Calcium-regulated heat stable protein 1	CARHSP1	SRERSPSPLRGNVVPSPLPTRRTRTFSATVR	41
-0.295946	0.244619	-0.233365	0.396012	-0.101918	0.388625	-0.0946786	0.102843	-0.328526	0.554746	-0.304689	0.304689	0.942486	Q9Y2V2	Calcium-regulated heat stable protein 1	CARHSP1	NVVPSPLPTRRTRTFSATVRASQGPVYKGVC	52
-0.188855	0.489133	-0.394805	0.167742	-0.212916	0.417225	-0.428988	0.215395	-0.134619	0.470085	-0.312722	0.133277	1	Q9Y2W1	Thyroid hormone receptor-associated protein 3	THRAP3	YGTGSASRASAVSELSPRERSPALKSPLQSV	243
0.407644	-0.95203	0.31679	-0.324875	0.875264	-0.470021	0.468556	-0.695216	0.182987	-0.180776	0.390809	-0.363531	0.999992	Q9Y2W1	Thyroid hormone receptor-associated protein 3	THRAP3	KSAKEKKSSSKDSRPSQAAGDNQGDEAKEQT	190
-0.0146185	0.0990874	-0.690614	-0.00649498	-0.0871347	0.242172	-0.655049	0.0896137	-0.0779694	0.0801811	-0.572324	0.136408	0.974344	Q9Y2W1	Thyroid hormone receptor-associated protein 3	THRAP3	QTNTDKEKIKEKGSFSDTGLGDGKMKSDSFA	379
-0.500352	0.509598	-0.807028	0.479239	-0.453742	0.446592	-0.78776	0.830648	-0.296648	0.29886	-0.603422	0.347635	0.992701	Q9Y2W1	Thyroid hormone receptor-associated protein 3	THRAP3	AKNKKSPEIHRRIDISPSTFRKHGLAHDEMK	682
-0.610541	0.608767	-0.890615	0.697672	-0.770965	0.763815	-1.34548	0.873631	-0.56171	0.563922	-0.727971	0.820777	0.999873	Q9Y2W1	Thyroid hormone receptor-associated protein 3	THRAP3	GSGSLSPSKKSPVGKSPPSTGSTYGSSQKEE	320
-0.552364	0.631472	-0.727453	0.53125	-0.492887	0.485737	-0.701919	0.55718	-0.392054	0.567522	-0.569179	0.390713	0.995561	Q9Y2W1	Thyroid hormone receptor-associated protein 3	THRAP3	VESSKRKSAKEKKSSSKDSRPSQAAGDNQGD	184
-0.294389	0.304212	-0.574016	0.273276	-0.371169	0.364019	-0.375793	0.465228	-0.328217	0.366703	-0.502726	0.326876	0.988843	Q9Y2W1	Thyroid hormone receptor-associated protein 3	THRAP3	NFRVTAYKAVQEKSSSPPPRKTSESRDKLGA	535
0.924155	-1.01927	1.22107	-0.945268	0.649144	-0.656293	1.10768	-1.51128	0.816983	-0.814771	1.02866	-1.51099	0.859927	Q9Y314	Nitric oxide synthase-interacting protein	NOSIP	SRPLNPFTAKALSGTSPDDVQPGPSVGPPSK	138
-0.392512	0.350951	-0.339697	0.662043	-0.431548	0.424398	-0.49208	0.968537	-0.446332	0.494351	-0.734377	0.44499	0.972071	Q9Y383	Putative RNA-binding protein Luc7-like 2	LUC7L2	RFRDQDLASCDRDRSSRDRSPRDRDRKDKKR	354
-0.716116	0.714342	-0.773529	0.972943	-0.802671	0.795521	-0.831332	1.0538	-0.596282	0.598494	-0.715835	0.667511	0.999435	Q9Y388	RNA-binding motif protein, X-linked 2	RBMX2	EKADREVQAEQPSSSSPRRKTVKEKDDTGPK	188
-0.387392	0.314059	-0.302805	0.408672	-0.460258	0.347693	-0.349158	0.445493	-0.188328	0.173305	-0.169751	0.37297	0.999893	Q9Y3P9	Rab GTPase-activating protein 1	RABGAP1	LVSRQGDETPSTNNGSDDEKTGLKIVGNGSE	42
-1.80609	1.28168	-1.27043	2.63008	-0.831278	0.802139	-0.803604	2.39227	-1.12243	1.12464	-1.22867	2.2891	0.997461	Q9Y3T9	Nucleolar complex protein 2 homolog	NOC2L	REAREAARSPDKPGGSPSASRRKGRASEHKD	56
0.323869	-1.14052	0.572563	-0.344982	0.541477	-0.702148	0.665562	-0.538998	0.448993	-0.446781	0.705973	-0.600711	0.999582	Q9Y446	Plakophilin-3	PKP3	SRGQYHTLQAGFSSRSQGLSGDKTSGFRPIA	95
-0.0399762	-0.00833659	0.0195907	0.143256	0.0502439	-0.103588	-0.0421579	0.28742	-0.00775437	-0.0622444	0.128996	0.00641306	0.972187	Q9Y478	5'-AMP-activated protein kinase subunit beta-1	PRKAB1	AALERHGGHKTPRRDSSGGTKDGDRPKILMD	24
0.458495	-0.336361	0.347615	-1.71471	0.245653	-0.252803	1.50967	-1.29157	0.132024	-0.258379	0.278007	-0.133365	0.984	Q9Y4B5	Microtubule cross-linking factor 1	MTCL1	PAAPRSPNLAGKAPPSPGSLAAPGRLSRRSG	87
0.391336	-0.39311	0.428879	-0.659309	0.518059	-0.403774	0.40231	-1.68025	0.39035	-0.32543	0.328984	-1.70469	0.999999	Q9Y4C1	Lysine-specific demethylase 3A	KDM3A	DVSNAPEVKAGVNSDSPNNCSGKKVEPSALA	463
-0.183495	1.37883	-0.0296894	0.0216042	-0.154079	1.06666	0.072793	-0.0646287	-0.316075	0.919012	-0.103123	0.103123	1	Q9Y4C1	Lysine-specific demethylase 3A	KDM3A	PSKDPRQQSTPQAANSPPNLGAKIPQGCHKQ	325
0.784096	-0.783793	0.795048	-2.31858	0.610641	-0.576619	0.575154	-2.25705	0.681703	-0.647387	0.65094	-1.91139	0.948958	Q9Y4E8	Ubiquitin carboxyl-terminal hydrolase 15	USP15	PKSPGASNFSTLPKISPSSLSNNYNNMNNRN	242
0.0666098	0.00275759	0.00849649	-0.436824	0.0444605	0.150654	-0.0363746	-0.166373	-0.0153505	0.0175622	0.0194188	-0.324061	1	Q9Y4F1	FERM, RhoGEF and pleckstrin domain-containing protein 1	FARP1	SAGEPGSHPSPAPRRSPAGNKQADGAASAPT	433
-0.0356511	0.238664	-0.0684093	0.0145376	-0.218544	0.211394	-0.454706	0.674201	0.0794175	0.114331	-0.0816869	-0.289589	0.957572	Q9Y4F1	FERM, RhoGEF and pleckstrin domain-containing protein 1	FARP1	LAEKSSSPAPEFLASSPPDNKSPDEATAADQ	872
1.93999	-1.41661	1.42787	-2.36564	0.955415	-0.962565	1.00934	-2.77908	0.727284	-0.609297	0.61285	-0.635724	0.965171	Q9Y4G6	Talin-2	TLN2	SGSSGPETFNVGSMPSPQQQVMVGQMHRGHM	473
1.2833	-1.80314	1.52342	-1.30441	0.855607	-0.862757	1.00557	-1.09045	-0.0691238	-0.639803	0.184971	0.0677825	1	Q9Y4G8	Rap guanine nucleotide exchange factor 2	RAPGEF2	SDHSTKYNRQNQSRESLEQAQSRASWASSTG	1316
-0.230984	0.655332	-0.734346	0.20987	0.000789469	0.337932	-0.720028	0.0016895	-0.202076	0.355107	-0.928099	0.200735	0.931692	Q9Y4H2	Insulin receptor substrate 2	IRS2	GGVGVGPGGGDEPPTSPRQLQPAPPLAPQGR	1203
[truncated: 229 more rows]

## Sheet: Naming of columns
Column		Sample
[truncated: 12 more rows]

## Sheet: Legend
Dataset EV2: All phosphosite intensities after filtering, selection, transformation, imputation, and normalization.
