# Supplementary material for: PLK1 inhibition delays mitotic entry revealing changes to the phosphoproteome of mammalian cells early in division
Source: EMBO J. 2025 Mar 3;44(7):1891–920. doi: 10.1038/s44318-025-00400-9 (PMC11962124; doi:10.1038/s44318-025-00400-9)
Supplement: Supplementary file 6 — Dataset EV3 [file 44318_2025_400_MOESM6_ESM.xlsx]

## Sheet: Sheet1
Protein	Protein.names	Gene.names	Sequence.window	Position	logFC difference	adj.P.Val difference	logFC IvsMinDMSO	adj.P.Val IvsMinDMSO	logFC IvsMinBI	adj.P.Val IvsMinBI	logFC IBIvsIDMSO	adj.P.Val IBIvsIDMSO	logFC MBIvsMDMSO	adj.P.Val MBIvsMDMSO
A0A2R8YFR7	Rho guanine nucleotide exchange factor 5	ARHGEF5	LRRTTPQQGASGPGRSPVGQARQPEKPSHLH	983	0.469911	0.161045	-0.743682	0.000883822	-0.273771	0.114162	0.60087	0.0133325	0.130959	0.739082
A6ND36	Protein FAM83G	FAM83G	QAKGGQVPRLLPDPGSPRLAQNARPMTDGRA	760	-0.134337	0.830816	-0.939879	0.00513982	-1.07422	0.0026736	-0.0322477	0.932285	0.102089	0.914266
A7E2V4	Zinc finger SWIM domain-containing protein 8	ZSWIM8	CQNWRGWRKQSAGPNSPTGGGGGGGSGGTRM	53	-0.0363992	0.894781	0.0397196	0.739027	0.00332042	0.979419	0.0346326	0.831294	0.0710318	0.833068
G9CGD6	Connector enhancer of kinase suppressor of ras 3	CNKSR3	SSKCKQPLPGPKGSESPNSFLDQESRRRRFT	383	-0.324643	0.563564	0.981287	0.00379638	0.656644	0.0316582	-0.402953	0.247326	-0.0783094	0.938653
O00151	PDZ and LIM domain protein 1	PDLIM1	HIGSAHNRSAMPFTASPASSTTARVITNQYN	130	1.51569	0.10582	-4.52856	2.94668e-06	-3.01288	8.16899e-05	1.59052	0.0157872	0.0748351	0.961248
O00178	GTP-binding protein 1	GTPBP1	MDSPVPASMFAPEPSSPGAARAAAAAARLHG	25	0.0984668	0.687368	2.42198	2.26822e-08	2.52045	5.84335e-08	-0.0823983	0.583138	-0.180865	0.349095
O00193	Small acidic protein	SMAP	SAARESHPHGVKRSASPDDDLGSSNWEAADL	17	-0.475447	0.0640604	1.20858	3.10399e-06	0.733136	0.000160259	-0.340219	0.0400556	0.135228	0.567326
O00264	Membrane-associated progesterone receptor component 1	PGRMC1	HVGKLLKEGEEPTVYSDEEEPKDESARKND_	181	-0.558922	0.0154162	1.20266	8.8347e-07	0.643734	0.000112666	-0.300635	0.0317659	0.258287	0.113657
O00264	Membrane-associated progesterone receptor component 1	PGRMC1	LYKIVRGDQPAASGDSDDDEPPPLPRLKRRD	57	-0.403673	0.224883	0.877305	0.000278493	0.473631	0.0133885	-0.308159	0.144415	0.0955138	0.837012
O00267	Transcription elongation factor SPT5	SUPT5H	PRDVTNFTVGGFAPMSPRISSPMHPSAGGQR	666	-0.968228	0.298308	0.594732	0.200536	-0.373496	0.425263	-0.93916	0.114318	0.0290679	0.984541
O00273	DNA fragmentation factor subunit alpha	DFFA	TQSLHSLRSISASKASPPGDLQNPKRARQDP	315	0.305662	0.598623	-0.485184	0.0970641	-0.179522	0.531461	0.336022	0.352104	0.0303599	0.973615
O00294	Tubby-related protein 1	TULP1	KGSGEADKDPSGSPASARKSPAAMFLVGEGS	215	0.809415	0.0149477	-0.646455	0.00100986	0.16296	0.277231	0.994712	0.000385722	0.185297	0.492278
O00303	Eukaryotic translation initiation factor 3 subunit F	EIF3F	DTERIGVDLIMKTCFSPNRVIGLSSDLQQVG	258	0.851438	0.0669723	-1.83811	1.16074e-05	-0.986676	0.00114356	0.24885	0.384462	-0.602589	0.0882953
O00308	NEDD4-like E3 ubiquitin-protein ligase WWP2	WWP2	HSGASARTTPATGEQSPGARSRHRQPVKNSG	211	0.190678	0.389454	-0.156938	0.153918	0.0337409	0.757066	0.135892	0.322774	-0.0547868	0.865428
O00418	Eukaryotic elongation factor 2 kinase	EEF2K	DEDLIFRLEGVDGGQSPRAGHDGDSDGDSDD	18	0.468312	0.0100457	-0.891777	1.18631e-06	-0.423465	0.000329854	0.811286	2.61865e-05	0.342973	0.0107525
O00425	Insulin-like growth factor 2 mRNA-binding protein 3	IGF2BP3	RGRRGLGQRGSSRQGSPGSVSKQKPCDLPLR	184	-0.181738	0.268862	0.468489	0.000161386	0.286751	0.0045647	-0.0895019	0.393305	0.0922365	0.551888
O00443	Phosphatidylinositol 4-phosphate 3-kinase C2 domain-containing subunit alpha	PIK3C2A	VNGKSLSVATVTRSQSLNIRTTQLAKAQGHI	338	0.180598	0.575271	1.19991	2.03332e-05	1.38051	1.14016e-05	0.0744652	0.719613	-0.106132	0.795248
O00472	RNA polymerase II elongation factor ELL2	ELL2	EDLKREEEIAKLNNSSPNSSGGVKEDCTASM	503	-0.99188	0.000479222	1.80952	3.54281e-08	0.81764	1.14879e-05	-0.0812352	0.504586	0.910645	0.000102349
O00472	RNA polymerase II elongation factor ELL2	ELL2	KLNPSQNAAGTSRSESPVCSSRDAVSSPQKR	305	-0.779672	0.00579013	0.585777	0.000420214	-0.193895	0.113305	-0.357733	0.0275088	0.421939	0.0278308
O00512	B-cell CLL/lymphoma 9 protein	BCL9	SNQGKQGGSASQSQPSPCDSKSGGHTPKALP	62	-0.124808	0.827947	-0.580207	0.0360858	-0.705015	0.0161458	0.0872797	0.800601	0.212088	0.719998
O00512	B-cell CLL/lymphoma 9 protein	BCL9	SNPKVRSSPSGNTQSSPKSKQEVMVRPPTVM	19	-0.205073	0.819709	3.16287	1.53208e-05	2.9578	3.6384e-05	-0.515843	0.30797	-0.31077	0.745757
O00571	ATP-dependent RNA helicase DDX3X	DDX3X	SRFSGGFGARDYRQSSGASSSSFSSSRASSS	606	0.631371	0.251136	-1.66804	0.000105445	-1.03667	0.00297499	0.412306	0.233164	-0.219065	0.734356
O00571	ATP-dependent RNA helicase DDX3X	DDX3X	FGARDYRQSSGASSSSFSSSRASSSRSGGGG	612	0.860535	0.10221	-1.78073	3.9989e-05	-0.920195	0.00406205	0.102098	0.762962	-0.758436	0.0631697
O00571	ATP-dependent RNA helicase DDX3X	DDX3X	ARDYRQSSGASSSSFSSSRASSSRSGGGGHG	614	0.857632	0.138223	-3.07036	1.54407e-06	-2.21273	2.50913e-05	0.755031	0.0468006	-0.102601	0.914989
O00571	ATP-dependent RNA helicase DDX3X;ATP-dependent RNA helicase DDX3Y	DDX3X;DDX3Y	HYKGSSRGRSKSSRFSGGFGARDYRQSSGAS	594	0.878945	0.638065	-3.34932	0.00274802	-2.47038	0.0159175	0.923331	0.422334	0.0443864	0.988545
O00571	ATP-dependent RNA helicase DDX3X	DDX3X	RSDSRGKSSFFSDRGSGSRGRFDDRGRSDYD	90	0.76496	0.212126	-2.7075	6.24729e-06	-1.94254	9.94736e-05	0.585318	0.131858	-0.179642	0.833068
O14495	Lipid phosphate phosphohydrolase 3	PPAP2B	YKYDKAIVPESKNGGSPALNNNPRRSGSKRV	19	1.34927	0.0154562	-2.95733	7.82756e-07	-1.60806	9.00101e-05	1.24961	0.00230535	-0.0996592	0.899227
O14545	TRAF-type zinc finger domain-containing protein 1	TRAFD1	CNPSRALPSLNTGSSSPRGVEEPDVIFQNFL	327	-0.0760469	0.689126	0.486425	0.000234646	0.410378	0.000894486	0.315337	0.0146772	0.391384	0.0102276
O14545	TRAF-type zinc finger domain-containing protein 1	TRAFD1	VTEGIPRLDSQPQETSPELPRRRVRHQGDLS	415	-0.0122255	0.974052	0.455211	0.00410231	0.442985	0.00534692	0.367036	0.0370691	0.379262	0.0658579
O14639	Actin-binding LIM protein 1	ABLIM1	TSGYDDKQERQSLGESPRTLSPTPSAEGYQD	426	-0.298543	0.333129	-0.469655	0.00854062	-0.768199	0.00048912	-0.148654	0.450201	0.14989	0.640355
O14639	Actin-binding LIM protein 1	ABLIM1	EGYQDVRDRMIHRSTSQGSINSPVYSRHSYT	452	-0.121432	0.843664	3.23172	8.03069e-07	3.11029	1.99664e-06	-0.713145	0.0488043	-0.591712	0.173125
O14641	Segment polarity protein dishevelled homolog DVL-2;Segment polarity protein dishevelled homolog DVL-3	DVL2;DVL3	EDDSTSRFSSSTEQSSASRLMRRHKRRRRKQ;EEDTMSRFSSSTEQSSASRLLKRHRRRRKQR	228	1.78488	0.0154562	-4.70217	2.32741e-07	-2.91729	1.03331e-05	1.67317	0.00217617	-0.11171	0.920755
O14646	Chromodomain-helicase-DNA-binding protein 1	CHD1	SDWQMDHRASSSGPRSPLDQRSPYGSRSPFE	1677	0.0678104	0.753967	1.03506	1.86985e-06	1.10287	2.2773e-06	-0.0626984	0.629745	-0.130509	0.456783
O14681	Etoposide-induced protein 2.4 homolog	EI24	RRRRASSVLAQRRAQSIERKQESEPRIVSRI	56	-0.285577	0.298358	1.59008	9.36256e-07	1.3045	6.53759e-06	-0.146411	0.403866	0.139166	0.621247
O14737	Programmed cell death protein 5	PDCD5	EKTTTVKFNRRKVMDSDEDDDY_________	119	-0.21034	0.298308	0.761304	2.09066e-05	0.550964	0.000278283	-0.268309	0.045701	-0.0579696	0.837012
O14745	Na(+)/H(+) exchange regulatory cofactor NHE-RF1	SLC9A3R1	AALESPRPALVRSASSDTSEELNSQDSPPKQ	291	-0.492015	0.434682	5.09973	1.0024e-07	4.60772	5.24192e-07	-0.019173	0.965697	0.472842	0.368158
O14908	PDZ domain-containing protein GIPC1	GIPC1	AFDMISQRSAGGRPGSGPQLGTGRGTLRLRS	232	-0.352433	0.223671	0.0660014	0.641851	-0.286432	0.0631469	-0.413722	0.0349732	-0.0612883	0.894906
O14920	Inhibitor of nuclear factor kappa-B kinase subunit beta	IKBKB	LLKIACSKVRGPVSGSPDSMNASRLSQPGQL	672	0.40406	0.0559364	-1.56744	1.39747e-07	-1.16338	1.88252e-06	0.299365	0.0300573	-0.104695	0.607086
O14974	Protein phosphatase 1 regulatory subunit 12A	PPP1R12A	QKKQNLLHSEKRDKKSPLIESTANMDNNQSQ	299	-0.0116558	0.984762	-0.693708	0.0074892	-0.705364	0.00754763	-0.169534	0.55808	-0.157878	0.775453
O15027	Protein transport protein Sec16A	SEC16A	WDRADSGPTQPPLSLSPAPETKRPGQAAKKE	2083	-0.113981	0.624846	-0.844787	2.22858e-05	-0.958768	1.35016e-05	0.173734	0.223815	0.287715	0.108053
O15027	Protein transport protein Sec16A	SEC16A	LERAQQELVPPQQQASPPQLPKAMFSELSNP	1069	0.216568	0.478232	-0.935134	8.95463e-05	-0.718566	0.000686897	0.458142	0.0276427	0.241574	0.337098
O15027	Protein transport protein Sec16A	SEC16A	PEDEASGSFFKQIDSSPVGGETDETTVSQNY	569	-0.0443914	0.880347	-0.997078	1.71509e-05	-1.04147	1.83161e-05	0.0930232	0.579486	0.137415	0.585258
O15042	U2 snRNP-associated SURP motif-containing protein	U2SURP	KHNYRNESARESLCDSPHQNLSRPLLENKLK	67	0.127757	0.724903	-1.27468	2.03332e-05	-1.14692	6.2106e-05	0.120028	0.583144	-0.00772895	0.989924
O15234	Protein CASC3	CASC3	LRGGGSCSGSAGGGGSGSLPSQRGGRTGALH	45	0.218026	0.593071	-0.437754	0.0411066	-0.219727	0.278956	-0.122724	0.642888	-0.34075	0.303209
O15234	Protein CASC3	CASC3	EEKPDTKSTVTGERQSGDGQESTEPVENKVG	148	-0.266509	0.244236	1.25524	1.40227e-06	0.988729	1.21539e-05	-0.442018	0.00956225	-0.175509	0.365091
O15344	E3 ubiquitin-protein ligase Midline-1	MID1	NIIDRFQKASVSGPNSPSETRRERAFDANTM	96	0.188165	0.452643	0.247351	0.0583393	0.435517	0.00441761	-0.185758	0.233164	-0.373924	0.0584493
O15357	Phosphatidylinositol 3,4,5-trisphosphate 5-phosphatase 2	INPPL1	LSGLEILSKVFDQQSSPMVTRLLQQQNLPQT	241	0.114348	0.928454	-1.88721	0.00381991	-1.77286	0.00608148	-0.232751	0.739124	-0.347099	0.804428
O15427	Monocarboxylate transporter 4	SLC16A3	AEPEKNGEVVHTPETSV______________	464	0.63359	0.0200969	-0.291511	0.030275	0.342079	0.0156224	0.176808	0.25499	-0.456782	0.0239315
O15446	DNA-directed RNA polymerase I subunit RPA34	CD3EAP	ELPGEGQPEARATPGSTKKRKKQSQESRMPE	459	0.994158	0.00113967	-0.403428	0.00298687	0.59073	0.000303075	1.1162	2.61865e-05	0.122043	0.557684
O15446	DNA-directed RNA polymerase I subunit RPA34	CD3EAP	TVPQEEMPGPPLNSESGEEAPTGRDKKRKQQ	490	-0.141868	0.612556	1.30832	3.57271e-06	1.16645	1.28741e-05	-0.0898429	0.617038	0.0520253	0.909283
O15541	RING finger protein 113A	RNF113A	__________MAEQLSPGKAVDQVCTFLFKK	6	0.0664513	0.753641	0.585754	0.000103628	0.652206	6.54315e-05	0.291674	0.0278981	0.225223	0.140392
O43149	Zinc finger ZZ-type and EF-hand domain-containing protein 1	ZZEF1	GSLLSWCYLQLKSTDSGAKDLAVDLIEKYVG	984	-0.70347	0.0888256	1.04685	0.00030546	0.34338	0.101572	-0.319939	0.208363	0.383532	0.237762
O43166	Signal-induced proliferation-associated 1-like protein 1	SIPA1L1	SPSGRLMRQDPVVHLSPNKQGHSDSHYSSHS	1270	-0.0895535	0.78458	0.559357	0.00259083	0.469803	0.00786461	0.488289	0.0200897	0.577842	0.0179926
O43237	Cytoplasmic dynein 1 light intermediate chain 2	DYNC1LI2	KDFQDYMEPEEGCQGSPQRRGPLTSGSDEEN	194	0.768755	0.00256936	-0.654242	5.8492e-05	0.114513	0.258257	0.716081	0.000241668	-0.0526734	0.858825
O43237	Cytoplasmic dynein 1 light intermediate chain 2	DYNC1LI2	PRTQGRGGPASVPSSSPGTSVKKPDPNIKNN	407	1.73722	0.00011107	-3.13641	5.13988e-09	-1.3992	1.31685e-06	1.82937	1.88196e-06	0.0921528	0.726429
O43314	Inositol hexakisphosphate and diphosphoinositol-pentakisphosphate kinase 2	PPIP5K2	LHYTSGVGTGRRRRRSGEQITSSPVSPKSLA	1006	0.150819	0.815004	2.55718	5.82466e-06	2.708	6.56994e-06	-0.333975	0.356787	-0.484794	0.304614
O43318	Mitogen-activated protein kinase kinase kinase 7	MAP3K7	LLKNQAKQQSESGRLSLGASRGSSVESLPPT	367	0.126936	0.865413	-1.65826	0.000366039	-1.53132	0.000759495	0.237763	0.576055	0.110827	0.920755
O43318	Mitogen-activated protein kinase kinase kinase 7	MAP3K7	VPEIVISGNGQPRRRSIQDLTVTGTEPGQVS	439	0.675811	0.317507	0.850572	0.0223529	1.52638	0.000941402	0.114499	0.800601	-0.561312	0.313481
O43399	Tumor protein D54	TPD52L2	____MDSAGQDINLNSPNKGLLSDSMTDVPV	12	0.277023	0.297926	-0.62701	0.000598005	-0.349988	0.0195111	0.724439	0.00148848	0.447416	0.0369376
O43491	Band 4.1-like protein 2	EPB41L2	RVITEEMNGKEISPGSGPGEIRKVEPVTQKD	718	0.188394	0.753967	-1.00212	0.00318192	-0.813731	0.0112418	0.250729	0.477915	0.0623352	0.956736
O43491	Band 4.1-like protein 2	EPB41L2	KEKPKEVAENQQNQSSDPEEEKGSQPPPAAE	39	-0.286664	0.189237	1.38789	4.86216e-07	1.10123	4.12631e-06	-0.24569	0.0809496	0.0409743	0.909575
O43491	Band 4.1-like protein 2	EPB41L2	EEKGSQPPPAAESQSSLRRQKREKETSESRG	58	0.124307	0.616982	0.0936478	0.42943	0.217955	0.086154	0.0329824	0.836616	-0.091325	0.750469
O43493	Trans-Golgi network integral membrane protein 2	TGOLN2	SHPEPQTPKDSPSKSSAEAQTPEDTPNKSGA	71	-0.325853	0.323026	1.29901	1.46503e-05	0.973157	0.000159478	0.0163412	0.94243	0.342195	0.193639
O43583	Density-regulated protein	DENR	EKNFPNEFAKLTVENSPKQEAGISEGQGTAG	73	-0.022245	0.96563	-1.33828	4.08118e-05	-1.36053	5.1706e-05	-0.036092	0.890879	-0.013847	0.981108
O43598	2'-deoxynucleoside 5'-phosphate N-hydrolase 1	DNPH1	LDRYFEADPPGQVAASPDPTT__________	169	0.523066	0.15906	-1.52875	1.07496e-05	-1.00568	0.000281389	0.245832	0.291953	-0.277234	0.376817
O43663	Protein regulator of cytokinesis 1	PRC1	KSDATSGILNSTNIQS_______________	620	0.472017	0.485069	-1.58649	0.000573609	-1.11447	0.00589646	0.254126	0.560402	-0.217891	0.804131
O43719	HIV Tat-specific factor 1	HTATSF1	ESEEGCPKRGFEGSCSQKESEEGNPVRGSEE	481	-1.28953	0.000449797	2.39469	2.40021e-08	1.10516	6.56994e-06	-0.637037	0.00147343	0.652492	0.00252797
O43719	HIV Tat-specific factor 1	HTATSF1	FLNAPEANRGLRRSDSVSASERAGPSRARHF	387	0.0778819	0.860678	0.99328	0.00033702	1.07116	0.000252594	-0.309588	0.205913	-0.38747	0.214007
O43719	HIV Tat-specific factor 1	HTATSF1	KFEKTEDGGEFEEGASENNAKESSPEKEAEE	445	2.21743	0.000479222	-0.909437	0.00109217	1.308	0.000117777	-0.917583	0.00493966	-3.13502	7.71137e-06
O43765	Small glutamine-rich tetratricopeptide repeat-containing protein alpha	SGTA	FEAAATGKEMPQDLRSPARTPPSEEDSAEAE	77	0.585509	0.418184	-1.15032	0.00655231	-0.564807	0.127773	0.360284	0.432787	-0.225225	0.812552
O43765	Small glutamine-rich tetratricopeptide repeat-containing protein alpha	SGTA	ELIEQLRSQIRSRTPSASNDDQQE_______	305	-0.304572	0.781773	0.710703	0.155181	0.406131	0.414955	-0.531454	0.400152	-0.226882	0.87967
O43768	Alpha-endosulfine	ENSA	______________MSQKQEEENPAEETGEE	2	-1.11701	0.000378011	-0.0380021	0.672478	-1.15502	1.22697e-06	-0.64457	0.000286396	0.472443	0.0040634
O43768	Alpha-endosulfine;cAMP-regulated phosphoprotein 19	ENSA;ARPP19	DFLMKRLQKGQKYFDSGDYNMAKAKMKNKQL;DFLRKRLQKGQKYFDSGDYNMAKAKMKNKQL	67	0.278168	0.389454	-1.97543	5.81094e-07	-1.69726	2.96105e-06	0.46151	0.0323543	0.183341	0.539356
O43815	Striatin	STRN	LRDVDELPSLQPSVGSPSRPSSSRLPEHEIN	376	0.971472	0.0971259	-2.12409	2.35606e-05	-1.15262	0.00198413	1.12493	0.00884136	0.15346	0.856852
O43823	A-kinase anchor protein 8	AKAP8	NQRLDMMSKEGGRGGSGGGGEGIQDRESSFR	112	0.555317	0.0636951	-1.42676	2.81068e-06	-0.871446	0.000140122	-0.26821	0.142636	-0.823527	0.00228034
O43823	A-kinase anchor protein 8	AKAP8	EPDTKLARVDSEGDFSENDDAAGDFRSGDEE	328	0.113955	0.81533	1.10313	0.000360829	1.21709	0.000231645	-0.179705	0.523173	-0.29366	0.442593
O43829	Zinc finger and BTB domain-containing protein 14	ZBTB14	IRFLDKLCSQKRDVSSPDENNGQSKSKYCLK	132	0.342714	0.402288	-0.614262	0.00886013	-0.271548	0.18899	-0.0866406	0.742691	-0.429355	0.183879
O43847	Nardilysin	NRD1	ARLGADESEEEGRRGSLSNAGDPEIVKSPSD	94	-0.634201	0.0204099	-0.375085	0.00936176	-1.00929	1.8303e-05	-0.645481	0.00196656	-0.01128	0.978074
O43896	Kinesin-like protein KIF1C	KIF1C	RRPPSPRRSHHPRRNSLDGGGRSRGAGSAQP	1033	-0.0351582	0.896342	0.564035	0.000594308	0.528877	0.00108147	-0.106386	0.487269	-0.0712276	0.829131
O43933	Peroxisome biogenesis factor 1	PEX1	LRADISIIKGRYRSQSGEDESMNQPGPIKTR	1211	-0.444162	0.047377	1.40745	3.92661e-07	0.963287	9.15736e-06	-0.275941	0.0508119	0.168221	0.347502
O60231	Putative pre-mRNA-splicing factor ATP-dependent RNA helicase DHX16	DHX16	KKKTGGSKQQTEKPESEDEWERTERERLQDL	160	0.00984405	0.983229	0.714025	0.000757751	0.723869	0.000827041	-0.242448	0.220346	-0.252292	0.333338
O60239	SH3 domain-binding protein 5	SH3BP5	SSSGSGGSSKSQSSTSPEGQALENRMKQLSL	421	0.408691	0.650022	-1.71565	0.00179595	-1.30695	0.00968853	0.446228	0.418212	0.0375365	0.978074
O60271	C-Jun-amino-terminal kinase-interacting protein 4	SPAG9	ELSQPRSHTSLKVSNSPEPQKAVEQEDELSD	251	-0.279021	0.175623	-0.25593	0.0235236	-0.534952	0.000373742	0.235346	0.0773193	0.514367	0.00470437
O60291	E3 ubiquitin-protein ligase MGRN1	MGRN1	SSPESFITEEVDESSSPQQGTRAASIENVLQ	506	0.528709	0.498436	-1.49393	0.00208	-0.965222	0.0240807	1.38256	0.013283	0.853855	0.160456
O60292	Signal-induced proliferation-associated 1-like protein 3	SIPA1L3	IMDNLGPEQERDTGQSPQKGLQRTLSDESLC	1534	0.675633	0.00160815	-0.732407	4.95428e-06	-0.0567748	0.481005	0.594814	0.00020318	-0.0808191	0.622118
O60292	Signal-induced proliferation-associated 1-like protein 3	SIPA1L3	DWPPKREALREHSNPSPSQDTDGTKATKMAH	100	-0.37394	0.563228	-1.31957	0.00144547	-1.69351	0.000336516	0.244694	0.55808	0.618634	0.228395
O60337	E3 ubiquitin-protein ligase MARCH6	2024-03-06	QRLVNYERKSGKQGSSPPPPQSSQE______	901	0.329013	0.378867	-2.63657	2.23051e-07	-2.30755	1.22914e-06	0.242313	0.296017	-0.0866997	0.876144
O60341	Lysine-specific histone demethylase 1A	KDM1A	LPPPPPQAPPEEENESEPEEPSGVEGAAFQS	166	0.224636	0.681218	0.709714	0.0148832	0.93435	0.00373502	0.115148	0.732184	-0.109488	0.894906
O60341	Lysine-specific histone demethylase 1A	KDM1A	YTLPRQATPGVPAQQSPSM____________	849	0.151765	0.695228	-1.61031	6.70688e-06	-1.45855	2.07525e-05	0.171786	0.467055	0.020021	0.973615
O60343	TBC1 domain family member 4	TBC1D4	DSGFDEQQEFRSRCSSVTGVQRRVHEGSQKS	318	-0.0734582	0.938751	1.51107	0.00231017	1.43761	0.00354699	-0.298389	0.561437	-0.224931	0.83898
O60353	Frizzled-6	FZD6	SRLSGEQVDGKGQAGSVSESARSEGRISPKS	641	0.828325	0.00793513	-0.242551	0.0788325	0.585774	0.00111406	0.0877682	0.615914	-0.740557	0.00255296
O60504	Vinexin	SORBS3	YPSSTRDPSASNGGGSPARREEKKRKAARLK	373	0.722228	0.0180124	-1.00627	2.61963e-05	-0.284039	0.054178	0.691109	0.00230535	-0.0311182	0.956736
O60504	Vinexin	SORBS3	EPRLRLCDDGPQLPTSPRLTAAARSARHPSS	530	-0.296433	0.268862	0.528679	0.00192911	0.232247	0.0972892	-0.252984	0.137256	0.0434489	0.923919
O60566	Mitotic checkpoint serine/threonine-protein kinase BUB1 beta	BUB1B	RKPGKEEGDPLQRVQSHQQASEEKKEKMMYC	384	-0.794055	0.0978544	-1.12341	0.000548667	-1.91746	1.74716e-05	0.512702	0.0904821	1.30676	0.00257781
O60684	Importin subunit alpha-7	KPNA6	__________METMASPGKDNYRMKSYKNNA	6	0.444936	0.0154162	-0.435627	0.00026376	0.00930963	0.912118	0.682991	9.00281e-05	0.238055	0.0658579
O60762	Dolichol-phosphate mannosyltransferase subunit 1	DPM1	_______MASLEVSRSPRRSRRELEVRSPRQ	9	0.151548	0.850462	0.402909	0.247415	0.554456	0.127227	0.0611972	0.897362	-0.0903503	0.947554
O60784	Target of Myb protein 1	TOM1	LEERAKAADRLPNLSSPSAEGPPGPPSGPAP	462	0.0339284	0.950661	-1.1661	0.000315672	-1.13217	0.000471249	0.28835	0.30797	0.254421	0.548793
O60828	Polyglutamine-binding protein 1	PQBP1	DPNSVVTKSAKKLRSSNADAEEKLDRSHDKS	95	0.465424	0.222398	-1.83605	3.42722e-06	-1.37063	4.25309e-05	0.360168	0.136886	-0.105256	0.847473
O60832	H/ACA ribonucleoprotein complex subunit 4	DKC1	AKAGLESGAEPGDGDSDTTKKKKKKKKAKEV	494	0.206663	0.597145	0.783872	0.00154687	0.990535	0.000397137	-0.0833541	0.739175	-0.290017	0.371724
O60832	H/ACA ribonucleoprotein complex subunit 4	DKC1	KKKKKKKKAKEVELVSE______________	513	-0.133009	0.521902	0.994015	3.11198e-06	0.861007	1.37029e-05	-0.135755	0.291121	-0.00274596	0.993571
O60841	Eukaryotic translation initiation factor 5B	EIF5B	KKGQKGKKQSFDDNDSEELEDKDSKSKKTAK	113	-0.0160887	0.963104	0.537788	0.00152065	0.521699	0.0021248	-0.193759	0.238752	-0.17767	0.442593
O60841	Eukaryotic translation initiation factor 5B	EIF5B	KAKGKAQKSNKKWDGSEEDEDNSKKIKERSR	164	-0.310808	0.093939	1.04092	9.64108e-07	0.730115	1.83931e-05	-0.273986	0.0276427	0.0368218	0.898057
O60841	Eukaryotic translation initiation factor 5B	EIF5B	GQKKNQKNKPGPNIESGNEDDDASFKIKTVA	214	-0.276333	0.25578	0.85301	3.50703e-05	0.576677	0.000696538	-0.212329	0.166682	0.0640044	0.858825
O60934	Nibrin	NBN	HPSTGLKTTTPGPSLSQGVSVDEKLMPSAPV	343	-1.53502	0.000459176	2.87754	2.87306e-08	1.34252	7.17175e-06	-1.2806	5.66741e-05	0.254416	0.280662
O75044	SLIT-ROBO Rho GTPase-activating protein 2;SLIT-ROBO Rho GTPase-activating protein 2B;SLIT-ROBO Rho GTPase-activating protein 2C	SRGAP2;SRGAP2B;SRGAP2C	QIGKSVKQEDRQTPRSPDSTANVRIEEKHVR	206	0.328736	0.502771	-0.437603	0.0797548	-0.108867	0.651464	0.628419	0.0488043	0.299683	0.494421
O75116	Rho-associated protein kinase 2	ROCK2	ARSSPRTSMKIQQNQSIRRPSRQLAPNKPS_	1374	0.056333	0.946208	0.689476	0.0574323	0.745809	0.045155	-0.38811	0.374978	-0.444443	0.471227
O75122	CLIP-associating protein 2	CLASP2	RGRSRTKMVSQSQPGSRSGSPGRVLTTTALS	459	0.479881	0.250763	0.232629	0.26156	0.712509	0.0052615	0.383643	0.147835	-0.0962377	0.87967
O75122	CLIP-associating protein 2	CLASP2	NHLRNTGNGTQSSMGSPLTRPTPRSPANWSS	892	-0.233373	0.819872	-0.69119	0.13756	-0.924562	0.0591674	-0.0705122	0.909335	0.16286	0.914989
O75122	CLIP-associating protein 2	CLASP2	AGSSKASSLPGSLQRSRSDIDVNAAAGAKAH	368	-0.194021	0.415528	0.21304	0.0814602	0.0190194	0.876162	-0.0966848	0.528025	0.0973362	0.719998
O75122	CLIP-associating protein 2	CLASP2	GSVASLPQSDRSSSSSQESLNRPFSSKWSTA	327	0.188542	0.273351	-0.0832297	0.326338	0.105312	0.229018	0.525168	0.000735092	0.336626	0.0175796
O75128	Protein cordon-bleu	COBL	NRNNNAGSFDSEGVASRRDSLAPLQAEHSQP	574	-0.484065	0.678208	-0.130082	0.811715	-0.614148	0.272657	-0.418984	0.560402	0.0650813	0.971039
O75147	Obscurin-like protein 1	OBSL1	______MKASSGDQGSPPCFLRFPRPVRVVS	10	-0.00135541	0.997414	-0.250819	0.182592	-0.252174	0.189208	-0.421836	0.082966	-0.420481	0.157789
O75151	Lysine-specific demethylase PHF2	PHF2	MAPGVFLTQRRPSASSPNNNTAAKGKRTKKG	1059	0.074311	0.783675	1.34032	1.32068e-06	1.41463	1.79579e-06	-0.179032	0.240099	-0.253343	0.193639
O75152	Zinc finger CCCH domain-containing protein 11A	ZC3H11A	QLSVQQNKLSVQSNPSPQLRSVMKVESSENV	132	0.293391	0.767181	-1.76564	0.00205376	-1.47225	0.00670591	0.602101	0.291532	0.30871	0.788054
O75152	Zinc finger CCCH domain-containing protein 11A	ZC3H11A	LFLPPSKTVLPTVPESPEEEVKASQLSVQQN	108	-0.172837	0.813215	-0.268909	0.399506	-0.441747	0.184154	-0.271888	0.518527	-0.0990511	0.929942
O75153	Clustered mitochondria protein homolog	CLUH	SLESKSEDPPGQEAGSEEEGSSASGLAKVKE	664	0.013104	0.975434	0.533423	0.00351066	0.546527	0.00343874	-0.16436	0.385924	-0.177464	0.522022
O75175	CCR4-NOT transcription complex subunit 3	CNOT3	DDKKRGRSTDSEVSQSPAKNGSKPVHSNQHP	299	0.0468632	0.781606	0.814866	1.56907e-06	0.861729	2.02664e-06	0.208984	0.0400556	0.16212	0.181054
O75179	Ankyrin repeat domain-containing protein 17	ANKRD17	PGGVSRNSPLDCGSASPNKVASSSEQEAGSP	2067	-0.391094	0.710028	1.91355	0.00220596	1.52245	0.00919795	-0.14509	0.827426	0.246004	0.86605
O75330	Hyaluronan mediated motility receptor	HMMR	KAPLKRFNDPSGCAPSPGAYDVKTLEVLKGP	20	0.032112	0.983306	-2.96231	0.000158124	-2.9302	0.000220216	0.744373	0.251471	0.712261	0.432456
O75330	Hyaluronan mediated motility receptor	HMMR	SKQNLNVDKDTTLPASARKVKSSESKESQKN	65	0.464718	0.260174	-3.20084	1.39747e-07	-2.73612	9.22693e-07	0.994735	0.00285972	0.530017	0.106094
O75351	Vacuolar protein sorting-associated protein 4B	VPS4B	VKEGQPSPADEKGNDSDGEGESDDPEKKKLQ	102	-0.325903	0.0631598	1.05963	5.4175e-07	0.733729	1.13525e-05	-0.130839	0.219188	0.195064	0.14341
O75369	Filamin-B	FLNB	TRGAGGQGKLDVTILSPSRKVVPCLVTPVTG	983	1.86184	0.000449797	-4.30268	6.1281e-09	-2.44083	4.95207e-07	1.5262	4.36838e-05	-0.335639	0.199969
O75391	Sperm-associated antigen 7	SPAG7	EEAMNEIRAKKRLRQSGEELPPTS_______	219	-0.47826	0.379835	-0.847644	0.0070857	-1.3259	0.000525712	-0.458421	0.175811	0.0198387	0.981037
O75391	Sperm-associated antigen 7	SPAG7	QRQEEEAAQQGPVVVSPASDYKDKYSHLIGK	158	-0.0809718	0.925885	-0.505108	0.16803	-0.586079	0.120714	0.0693372	0.888467	0.150309	0.89605
O75396	Vesicle-trafficking protein SEC22b	SEC22B	GEALSALDSKANNLSSLSKKYRQDAKYLNMR	175	0.0863128	0.676578	-0.252175	0.0203092	-0.165863	0.104217	-0.0402446	0.752423	-0.126557	0.470332
O75396	Vesicle-trafficking protein SEC22b	SEC22B	TKKLYIDSRARRNLGSINTELQDVQRIMVAN	137	-0.446677	0.434361	1.16655	0.00143333	0.719874	0.0226035	-0.919101	0.0206493	-0.472423	0.310677
O75427	Leucine-rich repeat and calponin homology domain-containing protein 4	LRCH4	SFLFRSSSQSGSGPSSPDSVLRPRRYPQVPD	521	-0.202228	0.766961	0.0397946	0.89721	-0.162434	0.602557	0.488572	0.213288	0.6908	0.161711
O75436	Vacuolar protein sorting-associated protein 26A	VPS26A	EKLRKQRTNFHQRFESPESQASAEQPEM___	315	0.431941	0.491505	-0.700425	0.0354731	-0.268484	0.388398	0.208008	0.608892	-0.223933	0.769819
O75459	P antigen family member 1	PAGE1	DEGASAAQGQEPEADSQELVQPKTGCELGDG	63	-0.828904	0.0151576	0.974515	6.87271e-05	0.145612	0.342947	-0.574158	0.0105826	0.254745	0.310677
O75459	P antigen family member 1	PAGE1	PNPEEVKTPEEDEGQSQP_____________	144	-1.02128	0.0360627	1.9023	1.07781e-05	0.881015	0.00267516	-0.478215	0.105213	0.543068	0.135486
O75459	P antigen family member 1	PAGE1	EQMKLPAEGPEPEADSQEQVHPKTGCERGDG	105	-0.894813	0.00445689	0.485222	0.00246489	-0.409591	0.0073348	-0.620832	0.00271259	0.273981	0.178596
O75475	PC4 and SFRS1-interacting protein	PSIP1	KFSSQQAATKQSNASSDVEVEEKETSVSKED	106	-1.59682	0.000825261	2.43605	2.01848e-07	0.839228	0.000487752	-0.087472	0.69234	1.50935	0.000148657
O75494	Serine/arginine-rich splicing factor 10	SRSF10	SPRNSRPTGRPRRSRSHSDNDRFKHRNRSFS	158	-0.242795	0.451331	0.541746	0.00476527	0.29895	0.0759723	-0.270353	0.180016	-0.0275576	0.960941
O75528	Transcriptional adapter 3	TADA3	PDMSGKESGADGASTSPRNQNKPFSVPHTKS	298	0.421184	0.109817	0.307541	0.0291549	0.728725	0.000226712	0.3759	0.0324135	-0.0452835	0.916736
O75554	WW domain-binding protein 4	WBP4	SDPETQKEKSIQKQNSLGSNEEKSKTLKKSN	277	0.624682	0.0180324	-1.38933	8.89928e-07	-0.764644	9.49653e-05	-0.248924	0.10394	-0.873606	0.000561448
O75592	E3 ubiquitin-protein ligase MYCBP2	MYCBP2	ILPARVKAIPRRRVNSGDTEVGSSLLRHPSP	3505	-0.255389	0.566214	0.221643	0.30747	-0.0337458	0.881901	-0.401631	0.149622	-0.146242	0.797459
O75643	U5 small nuclear ribonucleoprotein 200 kDa helicase	SNRNP200	EEGDEDVYGEVREEASDDDMEGDEAVVRCTL	225	-0.342195	0.0961123	1.23069	6.37315e-07	0.888491	1.03331e-05	-0.300061	0.0289711	0.0421336	0.895009
O75665	Oral-facial-digital syndrome 1 protein	OFD1	PSLHLLEAFKNITSSSPERHIFGEDRVVSEQ	686	-1.00627	0.000716223	1.94708	3.87743e-08	0.940804	8.45249e-06	-0.105912	0.421567	0.90036	0.00016445
O75674	TOM1-like protein 1	TOM1L1	TTSEPSAPSQDLLDLSPSPRMPRATLGELNT	321	1.20536	0.0270148	-2.32966	4.65074e-06	-1.1243	0.00104703	1.13506	0.00423479	-0.0703057	0.939541
O75694	Nuclear pore complex protein Nup155	NUP155	DTLQELVNQSKAAPQSPSVPKKPGPPVLSSD	992	0.259605	0.494963	-1.36751	2.6033e-05	-1.1079	0.000160259	0.255409	0.27857	-0.00419624	0.994293
O75909	Cyclin-K	CCNK	PQPSSPRQVKRAVVVSPKEENKAAEPPPPKI	340	-0.20458	0.402288	0.562844	0.000648778	0.358264	0.0109955	-0.0999065	0.523173	0.104674	0.696096
O75925	E3 SUMO-protein ligase PIAS1	PIAS1	EEPSAKRTCPSLSPTSPLNNKGILSLPHQAS	488	-0.166262	0.690412	2.82438	2.33615e-07	2.65812	8.78986e-07	-0.0582303	0.827223	0.108032	0.84976
O75970	Multiple PDZ domain protein	MPDZ	EKKNSSQSLMVPQSGSPEPESIRNTSRSSTP	1595	0.0230683	0.984762	-0.801609	0.0812623	-0.77854	0.0935281	0.188331	0.744285	0.165263	0.909912
O76021	Ribosomal L1 domain-containing protein 1	RSL1D1	ASETPKAAESETPGKSPEKKPKIKEEAVKEK	427	0.280499	0.690364	2.69678	1.26532e-05	2.97728	9.76138e-06	0.248005	0.566273	-0.0324943	0.976056
O76021	Ribosomal L1 domain-containing protein 1	RSL1D1	KKRGRGKAQVKATNESEDEIPQLVPIGKKTP	361	0.00667423	0.98375	0.482071	0.0011095	0.488745	0.00119409	-0.0350894	0.815768	-0.0417636	0.909912
O76021	Ribosomal L1 domain-containing protein 1	RSL1D1	PEKKPKIKEEAVKEKSPSLGKKDARQTPKKP	443	0.697228	0.0461811	-1.66383	2.64946e-06	-0.966598	0.000183221	0.78221	0.00319845	0.0849824	0.865045
O76070	Gamma-synuclein	SNCG	GEASKEKEEVAEEAQSGGD____________	124	-0.161092	0.423235	0.608819	9.72974e-05	0.447727	0.000983389	-0.182228	0.148021	-0.0211353	0.959949
O94761	ATP-dependent DNA helicase Q4	RECQL4	GPEASAFQEVSIRVGSPQPSSSGGEKRRWNE	251	-0.293989	0.191868	-0.208868	0.0739738	-0.502858	0.00100506	0.347538	0.0251826	0.641528	0.00228034
O94762	ATP-dependent DNA helicase Q5	RECQL5	QPTPAKDTWKGKRPRSQQENPESQPQKRPRP	858	-0.341311	0.351862	-0.677658	0.00271307	-1.01897	0.000229523	-0.369183	0.111315	-0.027872	0.961424
O94762	ATP-dependent DNA helicase Q5	RECQL5	APEKYTGEEDGAGGHSPAPPQTEECLRERPS	815	-0.0175953	0.96627	0.596235	0.00248168	0.57864	0.0033875	-0.0069447	0.974911	0.0106506	0.981332
O94776	Metastasis-associated protein MTA2	MTA2	FSANGRPLASGIRSSSQPAAKRQKLNPADAP	587	-0.300977	0.0885394	-0.422579	0.000448103	-0.723556	1.39487e-05	-0.405812	0.00314809	-0.104835	0.504605
O94804	Serine/threonine-protein kinase 10	STK10	QVAQEKQVAEQGGDLSPAANRSQKASQSRPN	438	-0.249847	0.158064	0.215076	0.0255193	-0.0347708	0.693314	-0.00300915	0.980215	0.246838	0.0733253
O94806	Serine/threonine-protein kinase D3	PRKD3	______________MSANNSPPSAQKSVLPT	2	-0.087974	0.748007	1.31632	1.88426e-06	1.22834	5.33964e-06	-0.125083	0.438702	-0.0371087	0.934182
O94806	Serine/threonine-protein kinase D3	PRKD3	__________MSANNSPPSAQKSVLPTAIPA	6	0.00328189	0.98982	1.2835	6.17255e-07	1.28678	1.31685e-06	-0.0267015	0.84761	-0.0299834	0.93704
O94826	Mitochondrial import receptor subunit TOM70	TOMM70A	GLKRNSERKTPEGRASPAPGSGHPEGPGAHL	91	0.0749538	0.928454	1.15365	0.00582251	1.2286	0.00454633	-0.208821	0.654765	-0.283774	0.729492
O94874	E3 UFM1-protein ligase 1	UFL1	YKIKKVKKKGRKDDDSDDESQSSHTGKKKPE	458	0.254259	0.25578	0.507882	0.000779056	0.76214	6.17656e-05	-0.00491721	0.974911	-0.259176	0.14329
O94874	E3 UFM1-protein ligase 1	UFL1	LSSSIKDLVLKSRKSSVTEE___________	790	0.572301	0.00865103	1.93405	2.40021e-08	2.50635	1.75147e-08	-0.25975	0.0397379	-0.832051	0.000156649
O94875	Sorbin and SH3 domain-containing protein 2	SORBS2	SSTTLTKSFTSSSPSSPSRAKGGDDSKICPS	302	-0.36734	0.503571	3.8141	2.44421e-07	3.44676	1.08343e-06	-0.200244	0.566273	0.167096	0.816586
O94979	Protein transport protein Sec31A	SEC31A	DRLCRAQGEPVAGHESPKIPYEKQQLPKGRP	799	-0.118928	0.549448	-0.0109615	0.910802	-0.12989	0.196633	-0.0467161	0.716927	0.072212	0.764623
O95049	Tight junction protein ZO-3	TJP3	ALARSSEPVQADESQSPRDRGRISAHQGAQV	856	0.602282	0.00208357	-0.961059	4.9349e-07	-0.358777	0.000680168	0.30498	0.00749445	-0.297302	0.0167613
O95071	E3 ubiquitin-protein ligase UBR5	UBR5	SQSSYIIRNPQQRRISQSQPVRGRDEEQDDI	1549	-0.362502	0.0904316	0.0608788	0.549626	-0.301623	0.0124341	-0.457031	0.00471411	-0.0945288	0.672288
O95155	Ubiquitin conjugation factor E4 B	UBE4B	SNSLETQSQSLSRSQSMDIDGVSCEKSMSQV	105	-0.1283	0.563228	1.15141	1.80833e-06	1.02311	7.25428e-06	-0.463122	0.00584282	-0.334822	0.0550381
O95155	Ubiquitin conjugation factor E4 B	UBE4B	AHRSQSSEGVSSLSSSPSNSLETQSQSLSRS	88	-0.512589	0.0302179	1.29363	8.83591e-07	0.781037	4.89225e-05	-0.074389	0.609843	0.4382	0.0167067
O95218	Zinc finger Ran-binding domain-containing protein 2	ZRANB2	GFNERENVEYIEREESDGEYDEFGRKKKKYR	120	-0.127291	0.695228	1.03194	4.93416e-05	0.904646	0.000169406	-0.124832	0.532273	0.002459	0.997187
O95218	Zinc finger Ran-binding domain-containing protein 2	ZRANB2	AVGPASILKEVEDKESEGEEEDEDEDLSKYK	153	-0.137259	0.681763	1.07457	4.53351e-05	0.937306	0.000161844	-0.0809138	0.698953	0.0563452	0.914989
O95218	Zinc finger Ran-binding domain-containing protein 2	ZRANB2	EDEDDADLSKYNLDASEEEDSNKKKSNRRSR	188	-0.396998	0.392768	1.20388	0.000281276	0.806886	0.00425884	-0.0958101	0.747819	0.301188	0.456783
O95232	Luc7-like protein 3	LUC7L3	SDTKNEVNGTSEDIKSEGDTQSN________	425	-0.0463522	0.892704	1.33244	6.48473e-06	1.28609	1.30706e-05	0.0251831	0.90195	0.0715353	0.875168
O95232	Luc7-like protein 3	LUC7L3	VNGTSEDIKSEGDTQSN______________	431	0.0510157	0.874148	0.823966	0.000138413	0.874982	0.000119925	-0.0632384	0.732108	-0.114254	0.729492
O95235	Kinesin-like protein KIF20A	KIF20A	FPSLHSFIKEHSLQVSPSLEKGAKADTGLDD	532	1.00906	0.0825663	-2.12003	2.09071e-05	-1.11097	0.00222795	0.96252	0.0165641	-0.0465378	0.960941
O95235	Kinesin-like protein KIF20A	KIF20A	IAEQYHTVLKLQGQVSAKKRLGTNQENQQPN	825	1.76786	0.0863961	-4.4202	6.2823e-06	-2.65233	0.00032903	1.75618	0.0144801	-0.011687	0.993885
O95239	Chromosome-associated kinesin KIF4A;Chromosome-associated kinesin KIF4B	KIF4A;KIF4B	KKRALASNTSFFSGCSPIEEEAH________	1225	0.576988	0.575452	-2.39909	0.000590809	-1.8221	0.00388559	0.99482	0.123331	0.417832	0.720225
O95243	Methyl-CpG-binding domain protein 4	MBD4	HTDILKRGSEMDNNCSPTRKDFTGEKIFQED	387	-0.442209	0.0505039	1.6863	1.35686e-07	1.24409	1.88252e-06	-0.622402	0.00107194	-0.180193	0.312919
O95248	Myotubularin-related protein 5	SBF1	HGKGVVGLFKAQNAPSPGQSQADSSSLEQEK	1229	0.426088	0.794015	-2.22392	0.00915392	-1.79783	0.0276752	0.798962	0.394794	0.372873	0.865428
O95251	Histone acetyltransferase KAT7	KAT7	VTRSSARLSQSSQDSSPVRNLQSFGTEEPAY	57	0.101068	0.941372	3.03493	0.000290588	3.136	0.000289231	-0.21876	0.774405	-0.319828	0.847473
O95292	Vesicle-associated membrane protein-associated protein B/C	VAPB	KEEDGLRMRKTVQSNSPISALAPTGKEEGLS	206	1.17206	0.234324	-3.67453	2.22887e-05	-2.50247	0.000440974	0.522488	0.405096	-0.64957	0.456783
O95295	SNARE-associated protein Snapin	SNAPIN	ARRRAMLDSGIYPPGSPGK____________	133	-0.0300752	0.965107	-0.247641	0.32377	-0.277716	0.281505	0.229394	0.482482	0.259469	0.617419
O95359	Transforming acidic coiled-coil-containing protein 2	TACC2	HTGVPGHVPRSTCAPSPQREVLTVPEANSEP	1635	1.40208	0.00843125	-2.70656	8.03069e-07	-1.30448	0.000208248	1.51659	0.000419573	0.114504	0.865428
O95359	Transforming acidic coiled-coil-containing protein 2	TACC2	EAGEVTPSDSGGQEDSPAKGLSVRLEFDYSE	2256	0.519993	0.0361322	0.289597	0.0245553	0.80959	5.62972e-05	0.658859	0.00123759	0.138866	0.525437
O95359	Transforming acidic coiled-coil-containing protein 2	TACC2	EGVVPPASGGGRVQNSPPVGRKTLPLTTAPE	2226	-0.178544	0.215832	0.873295	6.71517e-07	0.694751	5.71625e-06	-0.267142	0.0113571	-0.0885981	0.499388
O95361	Tripartite motif-containing protein 16	TRIM16	VGSSEKLGRETEEQDSDSAEQGDPAGEGKEV	60	-0.469595	0.133689	0.885047	0.000154587	0.415452	0.017588	-0.598174	0.0093287	-0.128579	0.714089
O95365	Zinc finger and BTB domain-containing protein 7A	ZBTB7A	QMMSSVGRAGAAAGDSDEESRADDKGVMDYY	337	0.135097	0.874757	-0.352713	0.341877	-0.217616	0.568184	-0.255063	0.607421	-0.39016	0.607429
O95365	Zinc finger and BTB domain-containing protein 7A	ZBTB7A	SPGATATPGAPAQPSSPDARRNGQEKHFKDE	526	-0.0848315	0.869489	2.15304	3.78809e-06	2.06821	8.60517e-06	-0.356663	0.213025	-0.271832	0.518089
O95391	Pre-mRNA-splicing factor SLU7	SLU7	LQEELASGKLVEQANSPKHQWGEEEPNSQME	215	-0.466806	0.0740199	1.18011	4.24066e-06	0.713305	0.000221647	-0.245841	0.126088	0.220965	0.287994
O95400	CD2 antigen cytoplasmic tail-binding protein 2	CD2BP2	ARGGGKGRKGPGQPSSPQRLDRLSGLADQMV	195	0.0469222	0.871491	0.663923	0.000312886	0.710845	0.000246424	-0.156105	0.334663	-0.203027	0.340794
O95425	Supervillin	SVIL	SATDYKFSSSIENSDSPVRSILKSQAWQPLV	920	1.52737	0.000449797	-2.04807	1.70184e-07	-0.520696	0.00282229	1.65679	8.81065e-06	0.12942	0.657563
O95429	BAG family molecular chaperone regulator 4	BAG4	SYSTEVPSTYRSSGNSPTPVSRWIYPQQDCQ	179	0.124352	0.475607	-1.07239	5.8747e-07	-0.948035	2.49911e-06	0.248537	0.0339069	0.124185	0.402347
O95453	Poly(A)-specific ribonuclease PARN	PARN	GRKKAKKLKRMKKELSPAGSISKNSPATLFE	619	0.0435332	0.850462	0.69237	4.06577e-05	0.735903	3.79895e-05	0.0288472	0.83092	-0.014686	0.962023
O95453	Poly(A)-specific ribonuclease PARN	PARN	QCIPYTLQNHYYRNNSFTAPSTVGKRNLSPS	557	1.31161	0.00810876	-0.480396	0.0350083	0.831211	0.00227216	-0.567749	0.0437015	-1.87936	0.000154484
O95453	Poly(A)-specific ribonuclease PARN	PARN	EKRSQANGAGALSYVSPNTSKCPVTIPEDQK	163	1.05925	0.00283271	-0.418718	0.00962683	0.640537	0.000884548	0.901836	0.00051595	-0.157419	0.551716
O95613	Pericentrin	PCNT	QGKAPRPGPRARQPQSPPRTRESPPTRDVPS	3242	-0.250993	0.211438	1.19157	7.64145e-07	0.94058	6.84578e-06	0.235674	0.0695594	0.486666	0.00556715
O95625	Zinc finger and BTB domain-containing protein 11	ZBTB11	VAEAIQTVKVEVAHISGGE____________	1050	0.0675775	0.83751	0.344808	0.0297748	0.412385	0.013992	-0.0473184	0.809604	-0.114896	0.738106
O95639	Cleavage and polyadenylation specificity factor subunit 4	CPSF4	LQRSSSLIQLTSQNSSPNQQRTPQVIGVMQS	212	0.563703	0.0636951	-0.58313	0.00179706	-0.019427	0.897442	1.04897	0.000241668	0.485266	0.0386493
O95639	Cleavage and polyadenylation specificity factor subunit 4	CPSF4	QRTPQVIGVMQSQNSSAGNRGPRPLEQVTCY	231	0.533649	0.0154562	-2.6212	6.07124e-09	-2.08756	6.36819e-08	0.484037	0.00255481	-0.0496123	0.865428
O95677	Eyes absent homolog 4	EYA4	SSGSKSRGRGRKNNPSPPPDSDLERVFVWDL	361	-0.0937883	0.710028	0.781816	5.71877e-05	0.688027	0.000188865	-0.183716	0.221227	-0.0899281	0.750218
O95747	Serine/threonine-protein kinase OSR1	OXSR1	DEESEEGKAAISQLRSPRVKESISNSELFPT	359	-0.267832	0.637287	-0.406892	0.140935	-0.674724	0.0260953	-0.0136066	0.972763	0.254226	0.659986
O95747	Serine/threonine-protein kinase OSR1	OXSR1	TISERAKKVRRVPGSSGRLHKTEDGGWEWSD	325	-0.4268	0.397993	-2.60141	1.84696e-06	-3.02821	1.35535e-06	0.502271	0.113371	0.92907	0.0221347
O95747	Serine/threonine-protein kinase OSR1	OXSR1	AEPAKTAQALSSGSGSQETKIPISLVLRLRN	427	-0.82818	0.0161758	0.990829	6.90126e-05	0.162649	0.297833	-0.512037	0.0195383	0.316143	0.202701
O95758	Polypyrimidine tract-binding protein 3	PTBP3	NGNDSKKFKRDRPPCSPSRVLHLRKIPCDVT	56	0.687621	0.0420795	-0.9035	0.000175426	-0.215879	0.188073	0.722765	0.00417065	0.035144	0.959949
O95817	BAG family molecular chaperone regulator 3	BAG3	NDPRVPSEGPKETPSSANGPSREGSRLPPAR	65	0.477808	0.431678	-2.73639	5.09998e-06	-2.25858	3.04995e-05	0.224414	0.565084	-0.253394	0.708139
O95817	BAG family molecular chaperone regulator 3	BAG3	AAAQPPASHGPERSQSPAASDCSSSSSSASL	173	0.149082	0.694496	-0.581685	0.00623915	-0.432603	0.0292862	0.141854	0.544569	-0.00722729	0.991687
O95817	BAG family molecular chaperone regulator 3	BAG3	LRAASPFRSSVQGASSREGSPARSSTPLHSP	275	-0.00270639	0.998364	2.71427	0.000532065	2.71157	0.00064843	-0.293586	0.693771	-0.29088	0.864857
O95819	Mitogen-activated protein kinase kinase kinase kinase 4	MAP4K4	PVRTTSRSPVLSRRDSPLQGSGQQNSQAGQR	639	0.256881	0.520987	-1.64743	9.50901e-06	-1.39055	4.6936e-05	0.403187	0.108234	0.146306	0.755802
O95819	Mitogen-activated protein kinase kinase kinase kinase 4	MAP4K4	QRPAEPQVPVRTTSRSPVLSRRDSPLQGSGQ	631	-0.340166	0.102008	0.520894	0.00034998	0.180727	0.0909702	-0.25677	0.0555073	0.0833961	0.725064
O95835	Serine/threonine-protein kinase LATS1	LATS1	HEIPTWQPNIPVRSNSFNNPLGNRASHSANS	464	-0.0287286	0.913339	0.0798947	0.470661	0.0511661	0.651464	-0.00490602	0.974966	0.0238226	0.959949
O95999	B-cell lymphoma/leukemia 10	BCL10	EPFPDGATNNLSRSNSDESNFSEKLRASTVM	138	-0.113331	0.651136	0.617189	0.000333633	0.503857	0.00151321	-0.511196	0.00564138	-0.397864	0.0389257
O96013	Serine/threonine-protein kinase PAK 4	PAK4	GSRGRFAGHSEAGGGSGDRRRAGPEKRPKSS	148	0.238591	0.754073	-0.76709	0.0407394	-0.528499	0.143564	0.00313857	0.995086	-0.235452	0.793831
O96013	Serine/threonine-protein kinase PAK 4	PAK4	FENMSVTRSNSLRRDSPPPPARARQENGMPE	104	-0.168785	0.446945	0.798244	2.63163e-05	0.629458	0.000194428	-0.269592	0.0593873	-0.100806	0.664311
O96020	G1/S-specific cyclin-E2	CCNE2	SRLQAKQQPQPSQTESPQEAQIIQAKKRKTT	21	-2.4767	0.00011107	3.69898	1.28377e-08	1.22227	2.39431e-05	-2.05066	6.20782e-06	0.426045	0.0843419
O96028	Histone-lysine N-methyltransferase NSD2	WHSC1	TPQKTAEADPRRGVGSPPGRKKTTVSMPRSR	437	-0.00539609	0.98375	1.05186	9.94739e-07	1.04647	1.99619e-06	-0.177042	0.129488	-0.171646	0.249742
P02545	Prelamin-A/C;Lamin-A/C	LMNA	ASGSGAQVGGPISSGSSASSVTVTRSYRSVG	615	-0.236848	0.642866	-0.511348	0.0492687	-0.748196	0.00951127	-0.433351	0.16208	-0.196503	0.732699
P02545	Prelamin-A/C;Lamin-A/C	LMNA	PSPTSQRSRGRASSHSSQTQGGGSVTKKRKL	406	-0.621659	0.0416507	2.16448	1.67276e-07	1.54282	2.97526e-06	-1.04701	0.000237519	-0.425347	0.0630995
P02545	Prelamin-A/C;Lamin-A/C	LMNA	SPTSQRSRGRASSHSSQTQGGGSVTKKRKLE	407	-0.627717	0.390706	2.86689	1.39476e-05	2.23918	0.000115321	-1.01129	0.0370582	-0.383575	0.585258
P02545	Prelamin-A/C;Lamin-A/C	LMNA	RGRASSHSSQTQGGGSVTKKRKLESTESRSS	414	0.325645	0.69868	-1.15327	0.0113654	-0.827628	0.0526892	0.839968	0.100751	0.514324	0.470332
P02545	Prelamin-A/C;Lamin-A/C	LMNA	ELEKTYSAKLDNARQSAERNSNLVGAAHEEL	277	0.251029	0.0873582	-0.687132	3.41341e-06	-0.436103	0.000129212	-0.153836	0.0934365	-0.404864	0.00231216
P02545	Prelamin-A/C;Lamin-A/C	LMNA	AYRKLLEGEEERLRLSPSPTSQRSRGRASSH	390	-0.385551	0.394286	1.39932	8.03502e-05	1.01377	0.000907014	-0.356617	0.205612	0.0289348	0.966031
P02545	Prelamin-A/C;Lamin-A/C	LMNA	RKLLEGEEERLRLSPSPTSQRSRGRASSHSS	392	0.314582	0.474646	1.51171	3.82417e-05	1.82629	1.46593e-05	0.597539	0.0404686	0.282957	0.467948
P02545	Prelamin-A/C;Lamin-A/C	LMNA	RRATRSGAQASSTPLSPTRITRLQEKEDLQE	22	1.22604	0.00536625	0.368875	0.0549213	1.59492	1.10768e-05	1.32294	0.000234709	0.0968994	0.856852
P02545	Prelamin-A/C;Lamin-A/C	LMNA	FGDNLVTRSYLLGNSSPRTQSPQNCSIM___	652	0.806092	0.0013274	-2.10728	1.60517e-08	-1.30118	6.655e-07	1.22958	6.05284e-06	0.423487	0.00780872
P02794	Ferritin heavy chain;Ferritin heavy chain, N-terminally processed	FTH1	SGLAEYLFDKHTLGDSDNES___________	179	-0.0309119	0.900695	0.75973	3.68848e-05	0.728818	6.99987e-05	0.0507193	0.722004	0.0816312	0.754063
P04183	Thymidine kinase, cytosolic	TK1	VAARKLFAPQQILQCSPAN____________	231	0.954249	0.202361	-3.5864	3.43684e-06	-2.63215	4.78578e-05	1.4372	0.00946735	0.482952	0.467973
P04183	Thymidine kinase, cytosolic	TK1	___MSCINLPTVLPGSPSKTRGQIQVILGPM	13	-0.159324	0.652656	-0.00135109	0.994025	-0.160675	0.349801	-0.043271	0.8487	0.116053	0.788054
P04637	Cellular tumor antigen p53	TP53	PPGSTKRALPNNTSSSPQPKKKPLDGEYFTL	315	-0.0556922	0.982591	0.978651	0.247193	0.922959	0.284272	1.16512	0.278323	1.22081	0.402347
P04792	Heat shock protein beta-1	HSPB1	AVAAPAYSRALSRQLSSGVSEIRHTADRWRV	82	-0.0381786	0.928379	1.04273	0.00013146	1.00455	0.000220684	-0.636879	0.0135175	-0.5987	0.0369376
P05114	Non-histone chromosomal protein HMG-14	HMGN1	EESPASDEAGEKEAKSD______________	99	-0.360766	0.028922	1.19267	1.39747e-07	0.831902	2.75133e-06	-0.253131	0.0200672	0.107635	0.419337
P05386	60S acidic ribosomal protein P1	RPLP1	AEEKKVEAKKEESEESDDDMGFGLFD_____	104	-0.365259	0.610461	0.55935	0.117348	0.194091	0.581742	-0.168942	0.713494	0.196317	0.842421
P05387	60S acidic ribosomal protein P2	RPLP2	AAEEKKDEKKEESEESDDDMGFGLFD_____	105	-0.365259	0.610461	0.55935	0.117348	0.194091	0.581742	-0.168942	0.713494	0.196317	0.842421
P05387	60S acidic ribosomal protein P2	RPLP2	SVPAGGAVAVSAAPGSAAPAAGSAPAAAEEK	79	0.658677	0.548898	-2.41019	0.000912262	-1.75152	0.00710002	0.53087	0.446258	-0.127807	0.955413
P05455	Lupus La protein	SSB	RFKGKGKGNKAAQPGSGKGKVQFQGKKTKFA	350	0.837716	0.429668	-2.82981	0.000239185	-1.9921	0.00280726	0.444773	0.512806	-0.392943	0.754063
P05455	Lupus La protein	SSB	GKGKVQFQGKKTKFASDDEHDEHDENGATGP	366	-0.0312054	0.931183	0.60634	0.00186732	0.575135	0.00297067	-0.165085	0.396572	-0.13388	0.689071
P05783	Keratin, type I cytoskeletal 18	KRT18	LGSVQAPSYGARPVSSAASVYAGAGGSGSRI	31	0.106762	0.952419	-1.60844	0.0415777	-1.50168	0.0571796	0.204238	0.835821	0.0974758	0.96524
P05783	Keratin, type I cytoskeletal 18	KRT18	VQAPSYGARPVSSAASVYAGAGGSGSRISVS	34	-0.604799	0.563998	-1.783	0.00443825	-2.3878	0.000844116	-0.205978	0.762962	0.398822	0.74671
P05783	Keratin, type I cytoskeletal 18	KRT18	RPVSSAASVYAGAGGSGSRISVSRSTSFRGG	42	0.682141	0.0900924	-1.83684	4.1383e-06	-1.1547	0.000165206	0.0574716	0.827223	-0.62467	0.0458918
P05783	Keratin, type I cytoskeletal 18	KRT18	_MSFTTRSTFSTNYRSLGSVQAPSYGARPVS	15	0.235061	0.779745	-2.56372	4.4962e-05	-2.32866	0.000122705	-0.120989	0.812112	-0.356049	0.657563
P05783	Keratin, type I cytoskeletal 18	KRT18	FTTRSTFSTNYRSLGSVQAPSYGARPVSSAA	18	-0.168217	0.841377	-2.41346	6.36245e-05	-2.58168	5.48537e-05	-0.0990935	0.841671	0.0691231	0.959949
P05783	Keratin, type I cytoskeletal 18	KRT18	_________MSFTTRSTFSTNYRSLGSVQAP	7	-0.170371	0.783675	-1.97429	3.47633e-05	-2.14466	2.7613e-05	-0.0338911	0.929284	0.13648	0.871305
P06241	Tyrosine-protein kinase Fyn	FYN	CKDKEATKLTEERDGSLNQSSGYRYGTDPTP	21	-0.102962	0.71689	0.701552	0.000279777	0.598591	0.00097917	-0.434354	0.0204839	-0.331392	0.116998
P06400	Retinoblastoma-associated protein	RB1	LLKEPYKTAVIPINGSPRTPRRGQNRSARIA	249	0.77095	0.0070626	0.86189	3.0785e-05	1.63284	8.16692e-07	0.836782	0.000308483	0.0658314	0.849239
P06454	Prothymosin alpha;Prothymosin alpha, N-terminally processed;Thymosin alpha-1	PTMA	______________MSDAAVDTSSEITTKDL	2	0.734356	0.19571	0.834772	0.0102159	1.56913	0.000246424	-0.183374	0.622122	-0.917729	0.0423743
P06454	Prothymosin alpha;Prothymosin alpha, N-terminally processed;Thymosin alpha-1	PTMA	_______MSDAAVDTSSEITTKDLKEKKEVV	9	2.36303	0.042251	-2.15244	0.00207678	0.210585	0.703756	-1.23578	0.083681	-3.59881	0.00100806
P06748	Nucleophosmin	NPM1	FKKQEKTPKTPKGPSSVEDIKAKMQASIEKG	243	0.816735	0.327854	-1.40264	0.00494103	-0.585907	0.169198	0.309476	0.566124	-0.507259	0.505292
P06748	Nucleophosmin	NPM1	KGPSSVEDIKAKMQASIEKGGSLPKVEAKFI	254	2.42846	0.0223	-5.82447	7.64145e-07	-3.39602	5.35413e-05	2.42116	0.00242896	-0.00729346	0.997638
P06748	Nucleophosmin	NPM1	EEEEDVKLLSISGKRSAPGGGSKVPQKKVKL	143	1.18739	0.155936	-3.28573	1.46136e-05	-2.09834	0.000456208	0.919268	0.086089	-0.268127	0.804459
P06756	Integrin alpha-V;Integrin alpha-V heavy chain;Integrin alpha-V light chain	ITGAV	QEREQLQPHENGEGNSET_____________	1046	-0.288625	0.452216	0.567316	0.00970461	0.27869	0.154104	-0.597301	0.023804	-0.308676	0.329382
P07814	Bifunctional glutamate/proline--tRNA ligase;Glutamate--tRNA ligase;Proline--tRNA ligase	EPRS	EYIPGQPPLSQSSDSSPTRNSEPAGLETPEA	886	-0.0612413	0.901684	-0.170288	0.426345	-0.231529	0.293855	-0.0408435	0.889892	0.0203977	0.977712
P07814	Bifunctional glutamate/proline--tRNA ligase;Glutamate--tRNA ligase;Proline--tRNA ligase	EPRS	QRKDPSKNQGGGLSSSGAGEGQGPKKQTRLG	1000	0.589765	0.0610116	-1.18247	1.57849e-05	-0.592707	0.00231124	-0.466018	0.0256617	-1.05578	0.000687088
P07900	Heat shock protein HSP 90-alpha	HSP90AA1	YPITLFVEKERDKEVSDDEAEEKEDKEEEKE	231	-0.457177	0.180969	0.741995	0.00102394	0.284817	0.108264	-0.157226	0.471668	0.299951	0.285042
P07900	Heat shock protein HSP 90-alpha	HSP90AA1	EEKESEDKPEIEDVGSDEEEEKKDGDKKKKK	263	-0.469431	0.410614	0.634367	0.0363624	0.164936	0.562031	-0.0855455	0.821419	0.383885	0.437197
P07910	Heterogeneous nuclear ribonucleoproteins C1/C2	HNRNPC	KDDEKEAEEGEDDRDSANGEDDS________	299	-0.475068	0.144757	1.40567	6.95124e-06	0.9306	0.000188865	-0.33623	0.103494	0.138838	0.698468
P07910	Heterogeneous nuclear ribonucleoproteins C1/C2	HNRNPC	EEGEDDRDSANGEDDS_______________	306	-0.617716	0.0312974	1.57523	8.71766e-07	0.957518	4.57663e-05	-0.424503	0.0235694	0.193213	0.402347
P07910	Heterogeneous nuclear ribonucleoproteins C1/C2	HNRNPC	EKEQSKQAVEMKNDKSEEEQSSSSVKKDETN	233	-0.289478	0.15797	0.795613	1.58348e-05	0.506135	0.000506801	-0.101087	0.438702	0.188391	0.255345
P07910	Heterogeneous nuclear ribonucleoproteins C1/C2	HNRNPC	AVEMKNDKSEEEQSSSSVKKDETNVKMESEG	240	0.51136	0.445225	-0.877353	0.0174557	-0.365993	0.274491	-0.136311	0.751381	-0.647671	0.222415
P08047	Transcription factor Sp1	SP1	EACTCPYCKDSEGRGSGDPGKKKQHICHIQG	617	0.69467	0.0302179	-2.28672	1.4877e-07	-1.59205	3.04689e-06	0.222538	0.236701	-0.472132	0.0483157
P08047	Transcription factor Sp1	SP1	GSSSSTGGGGQESQPSPLALLAATCSRIESP	59	-0.543201	0.282333	0.402838	0.117966	-0.140363	0.58154	-0.783249	0.0251666	-0.240048	0.654036
P08238	Heat shock protein HSP 90-beta;Putative heat shock protein HSP 90-beta-3	HSP90AB1;HSP90AB3P	YPITLYLEKEREKEISDDEAEEEKGEKEEED	226	-1.03835	0.00470262	1.01818	4.57279e-05	-0.0201725	0.896751	-0.420439	0.037707	0.617909	0.0137904
P08238	Heat shock protein HSP 90-beta;Putative heat shock protein HSP 90-beta 2	HSP90AB1;HSP90AB2P	EDKDDEEKPKIEDVGSDEEDDSGKDKKKKTK;ENKDDEEKPKIEDVGSDEEDDSGKDKKKKTK	255	-0.260602	0.367186	0.66584	0.00065148	0.405239	0.0137214	-0.262065	0.147835	-0.00146301	0.999421
P08621	U1 small nuclear ribonucleoprotein 70 kDa	SNRNP70	SGRDDTSRYDERPGPSPLPHRDRDRDRERER	226	-0.192093	0.241409	0.00418544	0.959284	-0.187907	0.0361027	-0.163083	0.119256	0.0290095	0.914989
P08651	Nuclear factor 1 C-type	NFIC	DVDTSPGGDYYTSPSSPTSSSRNWTEDMEGG	305	-0.582445	0.057232	4.03317	5.13988e-09	3.45073	3.96547e-08	-0.56512	0.0095615	0.0173254	0.971039
P08651	Nuclear factor 1 C-type	NFIC	PVKKTEMDKSPFNSPSPQDSPRLSSFTQHHR	339	0.164229	0.794104	3.55162	5.68192e-07	3.71585	9.83305e-07	-0.420554	0.238668	-0.584783	0.199969
P08651	Nuclear factor 1 C-type	NFIC	NPASTGLRRTLPSTSSSGSKRHKSGSMEEDV	276	0.730294	0.303664	-1.9079	0.000244911	-1.1776	0.00605094	0.674162	0.134986	-0.0561321	0.961424
P08670	Vimentin	VIM	IKTVETRDGQVINETSQHHDDLE________	459	2.78883	0.0158201	-2.74977	0.000268773	0.0390539	0.941183	-0.586909	0.3724	-3.37574	0.00100806
P08670	Vimentin	VIM	SYRRMFGGPGTASRPSSSRSYVTTSTRTYSL	25	0.0796543	0.931183	-2.11928	0.000222423	-2.03962	0.000361721	-0.299133	0.556237	-0.378788	0.640898
P08670	Vimentin	VIM	AENTLQSFRQDVDNASLARLDLERKVESLQE	214	-0.201983	0.527178	0.914546	0.000137891	0.712563	0.00091754	-0.0130676	0.952847	0.188915	0.513706
P08670	Vimentin	VIM	GSALRPSTSRSLYASSPGGVYATRSSAVRLR	56	2.18122	0.0121277	-4.81725	5.59977e-07	-2.63603	5.97374e-05	2.19828	0.00112489	0.0170579	0.990827
P08670	Vimentin	VIM	___________MSTRSVSSSSYRRMFGGPGT	5	-0.53852	0.235524	-0.597697	0.0181764	-1.13622	0.000486642	-0.0962817	0.744285	0.442238	0.226674
P08670	Vimentin	VIM	______MSTRSVSSSSYRRMFGGPGTASRPS	10	0.281505	0.456787	-1.78724	3.67056e-06	-1.50573	1.90053e-05	0.419436	0.0835325	0.137931	0.761312
P08670	Vimentin	VIM	GTASRPSSSRSYVTTSTRTYSLGSALRPSTS	34	-0.247758	0.593228	-1.80022	1.49531e-05	-2.04798	9.28076e-06	0.262327	0.364034	0.510085	0.157789
P09601	Heme oxygenase 1	HMOX1	FEELQELLTHDTKDQSPSRAPGLRQRASNKV	229	-0.298993	0.133134	0.59905	9.76636e-05	0.300058	0.0093722	-0.382055	0.00909923	-0.083062	0.708139
P09651	Heterogeneous nuclear ribonucleoprotein A1;Heterogeneous nuclear ribonucleoprotein A1, N-terminally processed	HNRNPA1	QEMASASSSQRGRSGSGNFGGGRGGGFGGND	199	-0.288664	0.150242	0.146879	0.144342	-0.141785	0.164584	-1.58777	1.88196e-06	-1.29911	1.77199e-05
P09651	Heterogeneous nuclear ribonucleoprotein A1;Heterogeneous nuclear ribonucleoprotein A1, N-terminally processed	HNRNPA1	NQGGYGGSSSSSSYGSGRRF___________	368	0.982589	0.17382	-2.90977	1.25834e-05	-1.92718	0.000312475	0.546954	0.22742	-0.435635	0.510892
P09651	Heterogeneous nuclear ribonucleoprotein A1;Heterogeneous nuclear ribonucleoprotein A1, N-terminally processed	HNRNPA1	__________MSKSESPKEPEQLRKLFIGGL	6	0.187011	0.257276	0.54547	5.49862e-05	0.732481	1.00845e-05	-0.412188	0.00235104	-0.5992	0.000576197
P09651	Heterogeneous nuclear ribonucleoprotein A1;Heterogeneous nuclear ribonucleoprotein A1, N-terminally processed	HNRNPA1	SSNFGPMKGGNFGGRSSGPYGGGGQYFAKPR	337	1.35905	0.0496279	-3.13408	3.84215e-06	-1.77503	0.000309227	0.451383	0.27863	-0.90767	0.0811189
P09651	Heterogeneous nuclear ribonucleoprotein A1;Heterogeneous nuclear ribonucleoprotein A1, N-terminally processed	HNRNPA1	SNFGPMKGGNFGGRSSGPYGGGGQYFAKPRN	338	0.933483	0.0185287	-2.97433	9.30124e-08	-2.04085	1.99664e-06	0.226313	0.317339	-0.70717	0.0167613
P0DMV9	Heat shock 70 kDa protein 1B;Heat shock 70 kDa protein 1A	HSPA1B;HSPA1A	GPGPGGFGAQGPKGGSGSGPTIEEVD_____	631	0.233864	0.473468	-0.545303	0.00493009	-0.311439	0.069084	-0.0398972	0.852176	-0.273761	0.304951
P0DMV9	Heat shock 70 kDa protein 1B;Heat shock 70 kDa protein 1A	HSPA1B;HSPA1A	GPGGFGAQGPKGGSGSGPTIEEVD_______	633	0.317008	0.284242	-0.802923	0.000232434	-0.485915	0.00647156	0.201344	0.281318	-0.115664	0.743485
P10398	Serine/threonine-protein kinase A-Raf	ARAF	DAAGSRGGSDGTPRGSPSPASVSSGRKSPHS	257	-0.0772852	0.858992	0.475783	0.0217654	0.398498	0.0485509	-0.0272875	0.914379	0.0499978	0.945365
P10644	cAMP-dependent protein kinase type I-alpha regulatory subunit;cAMP-dependent protein kinase type I-alpha regulatory subunit, N-terminally processed	PRKAR1A	LQKAGTRTDSREDEISPPPPNPVVKGRRRRG	83	-0.198557	0.213214	0.730297	4.81075e-06	0.531739	6.99987e-05	-0.425737	0.00162977	-0.22718	0.0696496
P11142	Heat shock cognate 71 kDa protein	HSPA8	NHFIAEFKRKHKKDISENKRAVRRLRTACER	254	-0.0768076	0.699921	0.63734	4.72186e-05	0.560532	0.000159799	0.0337936	0.789123	0.110601	0.532399
P11274	Breakpoint cluster region protein	BCR	GMMEGEGKGPLLRSQSTSEQEKRLTWPRRSY	301	0.491346	0.150242	0.884649	0.000297144	1.376	1.7838e-05	-0.132187	0.550039	-0.623533	0.0239315
P11387	DNA topoisomerase 1	TOP1	KDRDKEKRKEEKVRASGDAKIKKEKENGFSS	97	0.521486	0.698014	-2.77498	0.00101537	-2.2535	0.00419287	0.58041	0.476921	0.0589245	0.977908
P11388	DNA topoisomerase 2-alpha	TOP2A	KEAQQKVPDEEENEESDNEKETEKSDSVTDS	1106	-0.0593896	0.862834	0.6429	0.00111297	0.583511	0.00238211	0.135694	0.479223	0.195083	0.464796
P11388	DNA topoisomerase 2-alpha	TOP2A	EKKNKKKIKNENTEGSPQEDGVELEGLKQRL	1247	0.102269	0.858992	-0.817181	0.00601009	-0.714912	0.0133264	-0.123144	0.709598	-0.225413	0.676583
P11388	DNA topoisomerase 2-alpha	TOP2A	____________MEVSPLQPVNENMQVNKIK	4	0.940392	0.00327468	-2.08704	1.01004e-07	-1.14664	9.31711e-06	0.984664	0.000151751	0.044272	0.918318
P11388	DNA topoisomerase 2-alpha	TOP2A	GKAKGKKTQMAEVLPSPRGQRVIPRITIEMK	1213	1.92414	7.35835e-05	-2.09638	4.31859e-08	-0.172243	0.137913	2.00238	1.67729e-06	0.0782381	0.781504
P11532	Dystrophin	DMD	EQPQAEAKVNGTTVSSPSTSLQRSDSSQPML	3613	0.914987	0.0385072	-1.0434	0.000409042	-0.12841	0.542625	1.10427	0.00174305	0.189282	0.673295
P12270	Nucleoprotein TPR	TPR	MGGGEGNHRAADSQNSGEGNTGAAESSFSQE	2037	-1.15898	0.00579397	0.865901	0.000440574	-0.293083	0.108384	-0.556864	0.0230275	0.60212	0.0336064
P12270	Nucleoprotein TPR	TPR	DSQNSGEGNTGAAESSFSQEVSREQQPSSAS	2048	2.18115	0.00129869	-1.78041	3.02921e-05	0.400738	0.120108	-0.435734	0.165974	-2.61688	6.12346e-05
P12270	Nucleoprotein TPR	TPR	LVVPHRTDGFAEAIHSPQVAGVPRFRFGPPE	2155	-0.343621	0.490562	-0.11994	0.616971	-0.463561	0.0740696	-0.132874	0.681796	0.210748	0.700661
P12956	X-ray repair cross-complementing protein 6	XRCC6	NPEGKVTKRKHDNEGSGSKRPKVEYSEEELK	550	0.473368	0.109134	-1.84648	5.01128e-07	-1.37312	6.59543e-06	0.160269	0.385452	-0.313099	0.17415
P13639	Elongation factor 2	EEF2	RYFDPANGKFSKSATSPEGKKLPRTFCQLIL	279	0.89332	0.0380995	-2.0215	2.79427e-06	-1.12818	0.000250921	0.174665	0.507184	-0.718655	0.0297805
P13807	Glycogen [starch] synthase, muscle	GYS1	KDRRNIRAPEWPRRASCTSSTSGSKRNSVDT	698	-0.212004	0.596424	1.42993	2.66612e-05	1.21793	0.000117691	-0.355048	0.153108	-0.143044	0.767762
P13984	General transcription factor IIF subunit 2	GTF2F2	WELKPEYRHYQGEEKSD______________	248	-0.262955	0.298308	0.947779	2.16752e-05	0.684824	0.000291367	-0.165307	0.298336	0.0976482	0.745757
P14859	POU domain, class 2, transcription factor 1	POU2F1	KEKRINPPSSGGTSSSPIKAIFPSPTSLVAT	448	-0.083732	0.676739	0.947962	2.72257e-06	0.86423	8.71529e-06	0.053306	0.671061	0.137038	0.402003
P14866	Heterogeneous nuclear ribonucleoprotein L	HNRNPL	AAGGGGGGGRYYGGGSEGGRAPKRLKTDNAG	52	0.0157556	0.950661	-1.2003	9.61261e-07	-1.18454	1.99664e-06	-0.16511	0.209925	-0.180865	0.292751
P15056	Serine/threonine-protein kinase B-raf	BRAF	KALQKSPGPQRERKSSSSSEDRNRMKTLGRR	429	0.0209574	0.950661	1.42259	2.15178e-06	1.44355	3.46717e-06	-0.38837	0.0374696	-0.409328	0.0625602
P15056	Serine/threonine-protein kinase B-raf	BRAF	LARSLPKIHRSASEPSLNRAGFQTEDFSLYA	732	-0.467538	0.0215319	0.747272	1.35321e-05	0.279734	0.010433	-0.395612	0.00576287	0.071926	0.745757
P15408	Fos-related antigen 2	FOSL2	SVGAVVVKQEPLEEDSPSSSSAGLDKAQRSV	230	0.63059	0.0273386	-1.77197	3.6161e-07	-1.14138	1.2266e-05	0.0579673	0.739124	-0.572622	0.0107525
P15822	Zinc finger protein 40	HIVEP1	SESLPITQKISVGRLSPQQESSASSKRMLSP	1735	-0.354466	0.299485	0.758008	0.000912262	0.403542	0.0318039	-0.271077	0.209676	0.0833887	0.871232
P15822	Zinc finger protein 40	HIVEP1	KQTSVASANQVSRTESPQGLPTVQRENAKKV	2599	-0.482691	0.162609	-0.0229513	0.893651	-0.505643	0.011524	-0.769046	0.00433516	-0.286355	0.313481
P15924	Desmoplakin	DSP	SHPRINTLGRMIRAESGPDLRYEVTSGGGGT	22	-0.879142	0.0888256	0.723675	0.0116653	-0.155467	0.539673	-0.522535	0.104751	0.356608	0.40749
P15924	Desmoplakin	DSP	LRLLEAASVSSKGLPSPYNMSSAPGSRSGSR	2815	0.0184591	0.989984	-2.03789	0.00580516	-2.01943	0.00676409	0.294484	0.716927	0.276025	0.882012
P16070	CD44 antigen	CD44	NSRRRCGQKKKLVINSGNGAVEDRKPSGLNG	686	0.400032	0.518289	-0.290218	0.331363	0.109814	0.718089	0.137976	0.727427	-0.262055	0.698468
P16070	CD44 antigen	CD44	VEDRKPSGLNGEASKSQEMVHLVNKESSETP	706	0.117101	0.546605	0.00357864	0.970244	0.12068	0.215871	0.583402	0.000735092	0.466301	0.00556715
P16104	Histone H2AX	H2AFX	VGPKAPSGGKKATQASQEY____________	140	-0.73079	0.0898964	0.282018	0.179291	-0.448771	0.0470411	-0.156249	0.56556	0.57454	0.0811189
P16401	Histone H1.5	HIST1H1B	______________MSETAPAETATPAPVEK	2	-0.849741	0.163715	0.692942	0.034564	-0.156799	0.60587	-0.79437	0.0485866	0.0553714	0.959949
P16401	Histone H1.5	HIST1H1B	ETAPAETATPAPVEKSPAKKKATKKAAGAGA	18	-0.228239	0.688556	1.78634	5.21444e-05	1.5581	0.000184712	-0.0578926	0.873125	0.170347	0.809542
P16615	Sarcoplasmic/endoplasmic reticulum calcium ATPase 2	ATP2A2	TSKAFTGREFDELNPSAQRDACLNARCFARV	663	-0.159301	0.419527	0.798949	1.17279e-05	0.639648	8.23045e-05	-0.191365	0.124267	-0.0320638	0.923048
P16949	Stathmin	STMN1	ELEKRASGQAFELILSPRSKESVPEFPLSPP	25	1.31888	0.00182434	-2.1897	3.14544e-07	-0.870824	0.000294362	1.76588	1.65134e-05	0.447003	0.0774767
P16989	Y-box-binding protein 3	YBX3	PPRNYAGEEEEEGSGSSEGFDPPATDRQFSG	203	-0.0524254	0.783675	1.31421	1.48352e-07	1.26178	5.52162e-07	-0.30722	0.0137002	-0.254794	0.0625602
P17029	Zinc finger protein with KRAB and SCAN domains 1	ZKSCAN1	___MMTAESREATGLSPQAAQEKDGIVIVKV	13	-0.243012	0.174524	0.713384	1.35735e-05	0.470372	0.000346469	0.266819	0.0289164	0.509831	0.00228034
P17096	High mobility group protein HMG-I/HMG-Y	HMGA1	PKKLEKEEEEGISQESSEEEQ__________	102	-1.08928	0.0146809	2.10701	1.6517e-06	1.01773	0.000412418	-0.680336	0.0163146	0.408942	0.198684
P17096	High mobility group protein HMG-I/HMG-Y	HMGA1	TEKRGRGRPRKQPPVSPGTALVGSQKEPSEV	36	0.364593	0.68236	-2.47968	0.000129617	-2.11509	0.000481645	0.585908	0.268925	0.221315	0.858825
P17096	High mobility group protein HMG-I/HMG-Y	HMGA1	________MSESSSKSSQPLASKQEKDGTEK	8	-2.25722	7.2506e-05	0.749175	0.000121065	-1.50804	1.50758e-06	-0.911706	0.000237519	1.34551	6.04385e-05
P17275	Transcription factor jun-B	JUNB	TPTPPGQYFYPRGGGSGGGAGGAGGGVTEEQ	117	-0.716792	0.438065	-1.1924	0.0189309	-1.90919	0.00154605	-0.885575	0.127265	-0.168783	0.911773
P17480	Nucleolar transcription factor 1	UBTF	QKQYKVHLDLWVKSLSPQDRAAYKEYISNKR	638	1.57013	0.000449797	-3.29608	1.60902e-08	-1.72595	1.55433e-06	1.14062	0.000131252	-0.42951	0.0625602
P17706	Tyrosine-protein phosphatase non-receptor type 2	PTPN2	WKELSKEDLSPAFDHSPNKIMTEKYNGNRIG	304	-0.0359572	0.879679	0.935849	5.16429e-06	0.899891	1.11542e-05	0.0793247	0.55491	0.115282	0.552468
P17812	CTP synthase 1	CTPS1	RLSPRDTYSDRSGSSSPDSEITELKFPSINH	575	-0.477241	0.145489	1.39743	7.75268e-06	0.920189	0.000214669	-0.289155	0.158412	0.188086	0.536406
P18031	Tyrosine-protein phosphatase non-receptor type 1	PTPN1	RSRVVGGSLRGAQAASPAKGEPSLPEKDEDH	386	1.29078	0.00256936	-3.63839	1.99664e-08	-2.34761	6.7221e-07	1.46632	6.48659e-05	0.175548	0.600332
P18206	Vinculin	VCL	SKLNQAKGWLRDPSASPGDAGEQAIRQILDE	290	0.426982	0.753967	0.0474452	0.940138	0.474427	0.449531	0.581477	0.468171	0.154495	0.951589
P18583	Protein SON	SON	TSPVGEIGEEKILPTSETKQRTVLDTYPGVS	1570	0.962445	0.477932	-1.92203	0.0120663	-0.959587	0.16361	0.878502	0.297938	-0.0839438	0.968262
P19338	Nucleolin	NCL	EVVIPQKKGKKAAATSAKKVVVSPTKKVAVA	60	0.78645	0.126799	-3.45491	3.03131e-07	-2.66846	3.16577e-06	0.617348	0.0612694	-0.169102	0.795248
P19338	Nucleolin	NCL	IEGRAIRLELQGPRGSPNARSQPSKTLFVKG	563	0.0936385	0.840633	-1.17559	0.000163009	-1.08195	0.000363922	0.108841	0.690316	0.015203	0.981037
P19338	Nucleolin	NCL	KGKKAAATSAKKVVVSPTKKVAVATPAKKAA	67	-0.253179	0.0978544	1.03157	2.94838e-07	0.778394	3.52964e-06	-0.228219	0.0272068	0.0249602	0.921217
P19634	Sodium/hydrogen exchanger 1	SLC9A1	SSPGTDDVFTPAPSDSPSSQRIQRCLSDPGP	785	0.283005	0.325465	1.80947	5.29657e-07	2.09248	5.64831e-07	0.628937	0.00471668	0.345932	0.128897
P20020	Plasma membrane calcium-transporting ATPase 1	ATP2B1	DDTDAEDDAPTKRNSSPPPSPNKNNNAVDSG	1178	-0.0934134	0.909901	2.1716	9.90334e-05	2.07818	0.000177962	-0.12889	0.786636	-0.0354768	0.975378
P20042	Eukaryotic translation initiation factor 2 subunit 2	EIF2S2	______________MSGDEMIFDPTMSKKKK	2	-0.558044	0.0594136	1.2152	8.11659e-06	0.657153	0.000815758	-0.343846	0.0628836	0.214198	0.372618
P20700	Lamin-B1	LMNB1	PPRMGSRAGGPTTPLSPTRLSRLQEKEELRE	23	1.43496	0.00862991	-0.889629	0.00254536	0.545329	0.0346105	0.999148	0.00576287	-0.43581	0.255345
P20700	Lamin-B1;Lamin-B2	LMNB1;LMNB2	RKLLEGEEERLKLSPSPSSRVTVSRASSSRS;RKLLEGEEERLKLSPSPSSRVTVSRATSSSS	393	0.993968	0.0154562	1.13009	9.39442e-05	2.12406	1.86512e-06	1.17292	0.000541244	0.178947	0.640939
P20749	B-cell lymphoma 3 protein	BCL3	RGKATRPASTSQPDPSPDRSANTSPESSSRL	374	-0.907801	0.00174933	2.17742	3.0388e-08	1.26961	1.88006e-06	-0.935861	7.9843e-05	-0.0280607	0.948959
P20810	Calpastatin	CAST	DTGSNDAHNKKAVSRSAEQQPSEKSTEPKTK	87	0.491941	0.137743	-1.93478	8.03069e-07	-1.44284	1.05563e-05	0.158537	0.449784	-0.333405	0.204236
P20962	Parathymosin	PTMS	EDEADPKRQKTENGASA______________	101	0.357184	0.064777	0.042254	0.643766	0.399438	0.00133897	0.417814	0.00431896	0.0606308	0.804428
P21291	Cysteine and glycine-rich protein 1	CSRP1	PKGFGFGQGAGALVHSE______________	192	-0.105591	0.914069	-0.456684	0.270783	-0.562275	0.189488	-0.130459	0.817235	-0.0248681	0.984953
P21333	Filamin-A	FLNA	KVKAFGPGLQGGSAGSPARFTIDTKGAGTGG	1084	1.15616	0.367186	-2.89527	0.0007506	-1.73911	0.0161288	0.78775	0.324942	-0.36841	0.833716
P21359	Neurofibromin;Neurofibromin truncated	NF1	SPTTGHCNSGRTRHGSASQVQKQRSAGSFKR	2817	0.372851	0.157629	0.0230586	0.859865	0.39591	0.00991664	-0.0784758	0.650511	-0.451327	0.0332189
P21796	Voltage-dependent anion-selective channel protein 1	VDAC1	DQLARGLKLTFDSSFSPNTGKKNAKIKTGYK	104	0.151585	0.539879	0.137874	0.252764	0.28946	0.0307376	-0.158217	0.300387	-0.309802	0.107979
P22314	Ubiquitin-like modifier-activating enzyme 1	UBA1	____________MSSSPLSKKRRVSGPDPKP	4	-0.0905076	0.728245	0.905985	2.12731e-05	0.815478	6.49605e-05	-0.0726576	0.648778	0.01785	0.962023
P22626	Heterogeneous nuclear ribonucleoproteins A2/B1	HNRNPA2B1	YNGYGGGPGGGNFGGSPGYGGGRGGYGGGGP	259	1.13856	0.137743	-2.71207	3.04526e-05	-1.57351	0.00162331	0.610558	0.20301	-0.527999	0.423109
P22626	Heterogeneous nuclear ribonucleoproteins A2/B1	HNRNPA2B1	GDSRGGGGNFGPGPGSNFRGGSDGYGSGRGF	225	0.228276	0.687172	-2.9208	1.40057e-06	-2.69252	4.22127e-06	-0.0248553	0.946312	-0.253132	0.654506
P22626	Heterogeneous nuclear ribonucleoproteins A2/B1	HNRNPA2B1	NMGGPYGGGNYGPGGSGGSGGYGGRSRY___	341	0.69093	0.402081	-2.06073	0.000368836	-1.3698	0.00559295	0.0638154	0.907723	-0.627114	0.358826
P22626	Heterogeneous nuclear ribonucleoproteins A2/B1	HNRNPA2B1	FGNYNQQPSNYGPMKSGNFGGSRNMGGPYGG	318	-0.588595	0.37098	1.27358	0.0020137	0.684982	0.0501045	-0.920138	0.0362667	-0.331544	0.616774
P23193	Transcription elongation factor A protein 1	TCEA1	NSPEAREESTSSGNVSNRKDETNARDTYVSS	114	1.5094	0.0944231	-2.99049	4.46351e-05	-1.4811	0.00559581	0.501449	0.369822	-1.00795	0.148251
P23193	Transcription elongation factor A protein 1	TCEA1	DLDEKKKEPAITSQNSPEAREESTSSGNVSN	100	0.0459848	0.882026	0.557179	0.001552	0.603164	0.00109241	-0.127595	0.467139	-0.173579	0.480574
P23246	Splicing factor, proline- and glutamine-rich	SFPQ	RMGGGGAMNMGDPYGSGGQKFPPLGGGGGIG	626	0.672036	0.353501	-2.36114	5.62115e-05	-1.68911	0.000724956	0.450976	0.317821	-0.22106	0.817757
P23246	Splicing factor, proline- and glutamine-rich	SFPQ	RRGGGGGRGGLHDFRSPPPGMGLNQNRGPMG	33	-0.446346	0.70616	-1.70669	0.00862021	-2.15304	0.00258421	-0.267596	0.715434	0.17875	0.925822
P23528	Cofilin-1	CFL1	_____________MASGVAVSDGVIKVFNDM	3	-0.813317	0.0213822	-0.490063	0.00905597	-1.30338	1.89295e-05	-0.46249	0.0350413	0.350826	0.173125
P23588	Eukaryotic translation initiation factor 4B	EIF4B	RGYDSRIGSGRRAFGSGYRRDDDYRGGGDRY	283	0.187844	0.745182	-1.3235	0.000391433	-1.13565	0.00129029	-0.113461	0.741153	-0.301305	0.544663
P23588	Eukaryotic translation initiation factor 4B	EIF4B	WRSEETQERERSRTGSESSQTGTSTTSSRNA	422	-0.513021	0.599931	0.681083	0.159605	0.168062	0.726259	-1.0645	0.0861215	-0.551476	0.543281
P23588	Eukaryotic translation initiation factor 4B	EIF4B	SEETQERERSRTGSESSQTGTSTTSSRNARR	424	0.550933	0.330509	0.553013	0.0618976	1.10395	0.00234728	-0.791593	0.037292	-1.34253	0.00635876
P23588	Eukaryotic translation initiation factor 4B	EIF4B	AWVKRSSNPPARSQSSDTEQQSPTSGGGKVA	498	-0.598212	0.240249	2.4242	3.70162e-06	1.82599	4.3151e-05	-0.593769	0.0724715	0.00444315	0.997187
P23588	Eukaryotic translation initiation factor 4B	EIF4B	SNPPARSQSSDTEQQSPTSGGGKVAPAQPSE	504	-0.707716	0.0105877	0.0735577	0.53613	-0.634159	0.000374783	-0.621088	0.00211853	0.0866285	0.776185
P23588	Eukaryotic translation initiation factor 4B	EIF4B	DRGPPQRPKLNLKPRSTPKEDDSSASTSQST	340	1.51769	0.297926	-3.42423	0.000607367	-1.90654	0.0199795	1.51477	0.104658	-0.00292859	0.999997
P23588	Eukaryotic translation initiation factor 4B	EIF4B	NPASKFSSASKYAALSVDGEDENEGEDYAE_	597	0.22777	0.545593	0.876298	0.000594308	1.10407	0.000155875	-0.92088	0.00242203	-1.14865	0.00144416
P25054	Adenomatous polyposis coli protein	APC	TPASKSPSEGQTATTSPRGAKPSVKSELSPV	2270	1.01019	0.102292	2.75138	5.28213e-06	3.76157	1.31685e-06	1.042	0.0162729	0.0318161	0.973615
P25054	Adenomatous polyposis coli protein	APC	KRDSKTDSTESSGTQSPKRHSGSYLVTSV__	2830	0.596776	0.00524031	0.493618	0.000184002	1.09039	1.31685e-06	0.505657	0.00109432	-0.0911182	0.607429
P25054	Adenomatous polyposis coli protein	APC	GISPPNKLSQLPRTSSPSTASTKSSGSGKMS	2350	1.65477	0.000378011	-1.3319	3.05257e-06	0.322869	0.0311369	1.41975	2.38398e-05	-0.235021	0.29527
P25054	Adenomatous polyposis coli protein	APC	EAKVTSHTELTSNQQSANKTQAIAKQPINRG	1906	0.433238	0.645671	-2.56538	0.000165627	-2.13214	0.00072101	0.325312	0.579936	-0.107927	0.954382
P25054	Adenomatous polyposis coli protein	APC	YSLKYSDEQLNSGRQSPSQNERWARPKHIIE	1042	0.0516838	0.917525	0.753747	0.0034863	0.805431	0.00267412	0.0212495	0.941805	-0.0304343	0.962023
P25205	DNA replication licensing factor MCM3	MCM3	TEEEMPQVHTPKTADSQETKESQKVELSESR	728	-0.669901	0.138447	1.40269	8.11484e-05	0.732786	0.00647065	-0.73531	0.0200672	-0.0654086	0.934188
P25440	Bromodomain-containing protein 2	BRD2	GSAALGPSGFGPSGGSGTKLPKKATKTAPPA	611	0.378043	0.401611	-2.39531	1.51024e-06	-2.01726	8.71529e-06	1.36435	0.000705087	0.98631	0.0092151
P25440	Bromodomain-containing protein 2	BRD2	KPPRKDLPDSQQQHQSSKKGKLSEQLKHCNG	340	0.175102	0.85647	-2.29308	0.000206055	-2.11798	0.00043992	0.771902	0.144415	0.5968	0.402347
P25788	Proteasome subunit alpha type-3	PSMA3	EAEKYAKESLKEEDESDDDNM__________	250	-0.234789	0.241849	0.918507	5.00839e-06	0.683718	6.22212e-05	-0.249646	0.0578401	-0.0148569	0.962023
P26358	DNA (cytosine-5)-methyltransferase 1	DNMT1	ADDDEEVDDNIPEMPSPKKMHQGKKKKQNKN	714	-0.0819977	0.702496	0.87369	7.83942e-06	0.791692	2.39375e-05	-0.0570458	0.670509	0.0249519	0.9528
P26368	Splicing factor U2AF 65 kDa subunit	U2AF2	PLTRGAKEEHGGLIRSPRHEKKKKVRKYWDV	79	0.179614	0.521902	0.72362	0.00028495	0.903235	7.98528e-05	0.164334	0.34552	-0.01528	0.973615
P26368	Splicing factor U2AF 65 kDa subunit	U2AF2	______________MSDFDEFERQLNENKQE	2	-0.655116	0.311759	0.698693	0.0427192	0.043577	0.896594	-0.581043	0.155432	0.0740729	0.956736
P26374	Rab proteins geranylgeranyltransferase component A 2	CHML	VMAKLESSEESKNLESPEKHLQN________	649	0.400729	0.244236	-1.46511	8.80072e-06	-1.06438	0.000123398	0.200371	0.360237	-0.200358	0.536406
P26599	Polypyrimidine tract-binding protein 1	PTBP1	IYIQFSNHKELKTDSSPNQARAQAALQAVNS	141	0.778577	0.0147945	-2.14009	1.59377e-07	-1.36151	6.05198e-06	0.441975	0.0247371	-0.336602	0.134755
P26639	Threonine--tRNA ligase, cytoplasmic	TARS	________MFEEKASSPSGKMGGEEKPIGAG	8	0.895208	0.0184608	-1.56896	5.00839e-06	-0.673752	0.00231124	0.995581	0.00103509	0.100373	0.833068
P26639	Threonine--tRNA ligase, cytoplasmic	TARS	EEKQKEGGKKKNKEGSGDGGRAELNPWPEYI	39	0.0446162	0.871491	-0.348533	0.0121249	-0.303917	0.0250806	-0.261503	0.0956667	-0.306119	0.113297
P27694	Replication protein A 70 kDa DNA-binding subunit;Replication protein A 70 kDa DNA-binding subunit, N-terminally processed	RPA1	DGSRQPVLAIKGARVSDFGGRSLSVLSSSTI	384	0.759092	0.599218	-3.08277	0.00104126	-2.32367	0.00648767	0.542611	0.558348	-0.216481	0.929942
P27816	Microtubule-associated protein 4	MAP4	KPKPIADAKAPEKRASPSKPASAPASRSGSK	787	0.444242	0.122452	-0.0223524	0.873192	0.42189	0.0105459	0.510525	0.0131079	0.0662834	0.876144
P27816	Microtubule-associated protein 4	MAP4	APAKDVTLLKETERASPIKMDLAPSKDMGPP	358	0.687685	0.0246341	-0.766258	0.000230668	-0.0785732	0.58154	0.831182	0.000938471	0.143497	0.619477
P27816	Microtubule-associated protein 4	MAP4	TTTAAAVASTGPSSRSPSTLLPKKPTAIKTE	825	1.36168	0.0559364	-2.51856	2.38505e-05	-1.15688	0.00531661	1.49018	0.00476545	0.128499	0.909575
P27816	Microtubule-associated protein 4	MAP4	KPESNAVTKTAGPIASAQKQPAGKVQIVSKK	983	0.493353	0.760046	-2.94818	0.00182137	-2.45483	0.00608148	0.227389	0.819155	-0.265963	0.914989
P27816	Microtubule-associated protein 4	MAP4	TDYIPLLDVDEKTGNSESKKKPCSETSQIED	60	2.14824	0.0888256	-5.21474	8.65482e-06	-3.0665	0.00049255	2.22207	0.0131079	0.0738322	0.970279
P27816	Microtubule-associated protein 4	MAP4	NTSAPDLKNVRSKVGSTENIKHQPGGGRAKV	941	-0.179993	0.44791	2.34356	2.8935e-08	2.16357	1.52281e-07	-0.384953	0.0200897	-0.20496	0.287994
P27824	Calnexin	CANX	EDRKPKAEEDEILNRSPRNRKPRRE______	583	-0.304969	0.226901	0.912651	2.83835e-05	0.607682	0.000638302	-0.250895	0.119256	0.0540746	0.894205
P27824	Calnexin	CANX	DEEEEGEEKLEEKQKSDAEEDGGTVSQEEED	554	-0.0603892	0.940506	0.785321	0.0297127	0.724931	0.043795	-0.208551	0.63369	-0.148162	0.882012
P27824	Calnexin	CANX	EEKQKSDAEEDGGTVSQEEEDRKPKAEEDEI	564	-0.290211	0.448652	1.50856	1.41258e-05	1.21835	9.3404e-05	-0.254075	0.288205	0.0361363	0.959949
P28066	Proteasome subunit alpha type-5	PSMA5	MFLTRSEYDRGVNTFSPEGRLFQVEYAIEAI	16	0.979773	0.423843	-2.71854	0.000853716	-1.73877	0.0130698	0.853908	0.261632	-0.125864	0.959949
P28290	Sperm-specific antigen 2	SSFA2	QKGLEKAAAVADKRKSGSQDFPQCNTIENTG	591	-0.460271	0.425475	0.143653	0.608464	-0.316619	0.275104	-0.376087	0.296827	0.0841846	0.934182
P28715	DNA repair protein complementing XP-G cells	ERCC5	SDAPGLPNGRELTPASPTCTNSVSKNETHAE	526	0.0226436	0.950755	0.705525	0.000639371	0.728168	0.000627828	0.122522	0.532273	0.0998788	0.798952
P28715	DNA repair protein complementing XP-G cells	ERCC5	ARGRNAPAAVDEGSISPRTLSAIKRALDDDE	384	-0.0752279	0.624846	0.749037	2.56959e-06	0.673809	9.00272e-06	0.0668679	0.48464	0.142096	0.23846
P29084	Transcription initiation factor IIE subunit beta	GTF2E2	TPVVEKRSASSESSSSSSKKKKTKVEHGGSS	34	0.836138	0.291367	-2.82746	3.08814e-05	-1.99133	0.000473345	1.41184	0.0137586	0.575706	0.396446
P29692	Elongation factor 1-delta	EEF1D	SSPGHRATAPQTQHVSPMRQVEPPAKKPATP	133	0.0451842	0.871491	0.00395584	0.974331	0.0491401	0.690805	-0.016954	0.919669	-0.0621382	0.865428
P29966	Myristoylated alanine-rich C-kinase substrate	MARCKS	ASSTSSPKAEDGATPSPSNETPKKKKKRFSF	145	0.00127138	0.998364	1.66901	0.000679727	1.67028	0.0008141	-0.134599	0.777948	-0.135871	0.909575
P29966	Myristoylated alanine-rich C-kinase substrate	MARCKS	GEAAAERPGEAAVASSPSKANGQENGHVKVN	27	0.765272	0.0302179	-0.919384	0.000194169	-0.154111	0.355874	0.656533	0.00840076	-0.108739	0.801417
P29966	Myristoylated alanine-rich C-kinase substrate	MARCKS	EKGEPAAAAAPEAGASPVEKEAPAEGEAAEP	101	0.65317	0.214938	-2.4822	3.87924e-06	-1.82903	5.26311e-05	0.261639	0.437358	-0.39153	0.378831
P29966	Myristoylated alanine-rich C-kinase substrate	MARCKS	ANGQENGHVKVNGDASPAAAESGAKEELQAN	46	0.852558	0.546605	-2.34707	0.00496744	-1.49451	0.0466731	0.529004	0.560402	-0.323554	0.877096
P30260	Cell division cycle protein 27 homolog	CDC27	TPQDTIELNRLNLESSNSKYSLNTDSSVSYI	220	-1.35576	0.004893	0.255016	0.196941	-1.10075	0.000245141	-0.0248583	0.925848	1.33091	0.000850935
P30419	Glycylpeptide N-tetradecanoyltransferase 1	NMT1	DCENEEDNSYNRGGLSPANDTGAKKKKKKQK	47	0.233973	0.583924	-0.621484	0.0102387	-0.387511	0.0805159	0.731754	0.0153234	0.497781	0.135173
P31277	Homeobox protein Hox-D11	HOXD11	ADKGDPRTGAGGGGGSPCTKATPGSEPKGAA	223	-0.475852	0.237755	1.46036	2.74602e-05	0.98451	0.000569171	-1.11744	0.00134172	-0.641593	0.0458918
P31943	Heterogeneous nuclear ribonucleoprotein H;Heterogeneous nuclear ribonucleoprotein H, N-terminally processed;Heterogeneous nuclear ribonucleoprotein H2	HNRNPH1;HNRNPH2	NNVEMDWVLKHTGPNSPDTANDGFVRLRGLP;NSVEMDWVLKHTGPNSPDTANDGFVRLRGLP	104	0.301448	0.455602	-0.661228	0.00553465	-0.35978	0.086479	-0.196016	0.444593	-0.497464	0.117022
P31948	Stress-induced-phosphoprotein 1	STIP1	DGYQRCMMAQYNRHDSPEDVKRRAMADPEVQ	481	0.344184	0.288183	-0.794325	0.000461669	-0.450141	0.0151004	-0.179074	0.385165	-0.523257	0.0431152
P32004	Neural cell adhesion molecule L1	L1CAM	QYSGKKEKEAAGGNDSSGATSPINPAVALE_	1243	0.635157	0.157629	1.55725	3.62339e-05	2.1924	5.03424e-06	0.0082615	0.97959	-0.626896	0.0733253
P32004	Neural cell adhesion molecule L1	L1CAM	KEKEAAGGNDSSGATSPINPAVALE______	1248	0.772012	0.259758	-1.55656	0.000773871	-0.78455	0.0360639	0.851379	0.0578401	0.0793667	0.956329
P32242	Homeobox protein OTX1	OTX1	FKNRRAKCRQQQQSGSGTKSRPAKKKSSPVR	101	1.0948	0.351055	-2.73227	0.000608784	-1.63746	0.0141056	0.488128	0.516339	-0.606675	0.600921
P33316	Deoxyuridine 5'-triphosphate nucleotidohydrolase, mitochondrial	DUT	VQALDDTERGSGGFGSTGKN___________	248	1.26096	0.00208357	-2.89661	4.71006e-08	-1.63564	3.54875e-06	0.746746	0.00314316	-0.514218	0.0421209
P33981	Dual specificity protein kinase TTK	TTK	KHTTFEQPVFSVSKQSPPISTSKWFDPKSIC	436	0.464797	0.0181961	-1.22028	2.96271e-07	-0.755484	1.32465e-05	0.691039	0.000142765	0.226242	0.107979
P33991	DNA replication licensing factor MCM4	MCM4	RGSRRGRATPAQTPRSEDARSSPSQRRRGED	26	1.44022	0.0949889	0.0539259	0.89721	1.49414	0.00414239	1.12685	0.0442883	-0.313363	0.755802
P33991	DNA replication licensing factor MCM4	MCM4	SGVRGTPVRQRPDLGSAQKGLQVDLQSDGAA	120	0.470484	0.0961562	-0.411022	0.00990377	0.0594619	0.668445	0.485494	0.0146488	0.0150099	0.973615
P35221	Catenin alpha-1;Catenin alpha-2	CTNNA1;CTNNA2	DSDFETEDFDVRSRTSVQTEDDQLIAGQSAR	655	0.402798	0.159691	-0.625556	0.000975814	-0.222758	0.130634	0.0686105	0.714072	-0.334187	0.138115
P35251	Replication factor C subunit 1	RFC1	TPKKTKSSPAKKESVSPEDSEKKRTNYQAYR	368	-0.0787537	0.698014	1.79415	4.29237e-08	1.71539	1.69245e-07	0.144401	0.23174	0.223155	0.142452
P35269	General transcription factor IIF subunit 1	GTF2F1	PAAKRLRLDTGPQSLSGKSTPQPPSGKTTPN	433	2.36177	0.0102015	-4.97852	6.07168e-07	-2.61675	8.74874e-05	2.15784	0.00163365	-0.203938	0.865428
P35579	Myosin-9	MYH9	FVVPRRMARKGAGDGSDEEVDGKADGAEAKP	1943	-0.00704825	0.976769	0.823102	4.54054e-06	0.816054	8.30471e-06	-0.0590228	0.613992	-0.0519745	0.833068
P35579	Myosin-9	MYH9	AQQERDELADEIANSSGKGALALEEKRRLEA	1714	1.8859	0.00362812	-1.51162	0.000141801	0.374279	0.161594	-0.278844	0.400741	-2.16474	0.000244329
P35658	Nuclear pore complex protein Nup214	NUP214	SVLPSPSGRSAQGSSSPVPSMVQKSPRITPP	657	0.0907286	0.83751	-0.721968	0.00287892	-0.63124	0.00696992	0.136228	0.593175	0.0454996	0.956014
P35658	Nuclear pore complex protein Nup214	NUP214	KTPERLSLEGERQPKSPGSTPTTPTSSQAPQ	430	-0.216051	0.659265	1.85118	1.51935e-05	1.63513	5.34157e-05	0.0521028	0.869968	0.268154	0.546042
P35658	Nuclear pore complex protein Nup214	NUP214	SAPPSSVPLKSSVLPSPSGRSAQGSSSPVPS	646	0.867928	0.324777	-2.32793	0.000270918	-1.46	0.00600835	1.04265	0.0680138	0.174719	0.899431
P37275	Zinc finger E-box-binding homeobox 1	ZEB1	SANANEPQDSTVNLQSPLKMTNSPVLPVGST	679	-0.0510458	0.840633	0.968849	7.71314e-06	0.917803	1.72511e-05	0.0916943	0.529304	0.14274	0.481435
P37802	Transgelin-2	TAGLN2	PNWFPKKSKENPRNFSDNQLQEGKNVIGLQM	163	-0.245802	0.638162	-1.04817	0.00136342	-1.29397	0.000407386	-0.762731	0.0276068	-0.516929	0.199969
P37837	Transaldolase	TALDO1	____________MSSSPVKRQRMESALDQLK	4	-0.208012	0.309367	0.918366	5.60553e-06	0.710354	5.3214e-05	-0.0704815	0.597294	0.13753	0.444328
P38159	RNA-binding motif protein, X chromosome;RNA-binding motif protein, X chromosome, N-terminally processed;RNA binding motif protein, X-linked-like-1	RBMX;RBMXL1	DDYSSSRDGYGGSRDSYSSSRSDLYSSCDRV;DDYSSSRDGYGGSRDSYSSSRSDLYSSGRDR	326	0.630574	0.00569086	-1.00933	1.6275e-06	-0.378758	0.00205348	-0.423118	0.00435047	-1.05369	4.45123e-05
P38159	RNA-binding motif protein, X chromosome;RNA-binding motif protein, X chromosome, N-terminally processed;RNA binding motif protein, X-linked-like-1	RBMX;RBMXL1	SSGMGGRAPLSRGRDSYGGPPRREPLPSRRD;SSGMGGRAPVSRGRDSYGGPPRREPLPSRRD	189	0.446637	0.695228	-1.29491	0.0279026	-0.848278	0.128772	0.346784	0.625416	-0.0998527	0.959949
P38159	RNA-binding motif protein, X chromosome;RNA-binding motif protein, X chromosome, N-terminally processed;RNA binding motif protein, X-linked-like-1	RBMX;RBMXL1	PPRREPLPSRRDVYLSPRDDGYSTKDSYSSR	208	0.13618	0.500436	-0.485394	0.000470563	-0.349213	0.0043498	-0.0195502	0.884602	-0.155731	0.348802
P38398	Breast cancer type 1 susceptibility protein	BRCA1	YMHSCSGSLQNRNYPSQEELIKVVDVEEQQL	1524	-1.30686	0.00753089	2.68283	4.41062e-07	1.37596	7.34229e-05	-0.761511	0.0121695	0.545353	0.0960899
P38432	Coilin	COIL	TVFWKELIDPRLIIESPSNTSSTEPA_____	566	-1.06854	0.048457	1.0634	0.00149878	-0.0051356	0.984587	0.692258	0.0442947	1.76079	0.000831304
P38432	Coilin	COIL	SISDGPSKVTLEARNSSEKLPTELSKEEPST	271	0.116587	0.690504	-0.820581	0.000128496	-0.703994	0.000459123	-0.0731796	0.690389	-0.189767	0.437197
P38919	Eukaryotic initiation factor 4A-III;Eukaryotic initiation factor 4A-III, N-terminally processed	EIF4A3	____MATTATMATSGSARKRLLKEEDMTKVE	12	0.266992	0.797613	-0.848666	0.0815882	-0.581674	0.223846	0.185958	0.762962	-0.0810336	0.960941
P38936	Cyclin-dependent kinase inhibitor 1	CDKN1A	LSCTLVPRSGEQAEGSPGGPGDSQGRKRRQT	130	-0.183517	0.500436	0.309641	0.0324479	0.126124	0.35007	3.10224	4.08437e-07	3.28576	2.3241e-07
P39880	Homeobox protein cut-like 1	CUX1	SLNRLFQEVPKRRNGSEGNITTRIRASETGS	652	0.412922	0.436563	-2.37268	5.33242e-06	-1.95976	3.18147e-05	0.370834	0.259004	-0.0420877	0.961248
P40123	Adenylyl cyclase-associated protein 2	CAP2	TYKNPSLRAQGGQTQSPTKSHTPSPTSPKSY	301	0.40386	0.0621281	-0.153134	0.145207	0.250726	0.0290494	0.253052	0.0619168	-0.150809	0.396446
P40123	Adenylyl cyclase-associated protein 2	CAP2	GPPPLFENEGKKEESSPSRSALFAQLNQGEA	257	1.17996	0.0390382	-3.0601	1.10388e-06	-1.88014	5.36327e-05	0.971915	0.0134203	-0.208043	0.74671
P40222	Alpha-taxilin	TXLNA	GPERRPEGPGAQAPSSPRVTEAPCYPGAPST	515	-0.320695	0.0639597	0.229507	0.0147468	-0.0911876	0.280054	-0.154663	0.144415	0.166032	0.216625
P40818	Ubiquitin carboxyl-terminal hydrolase 8	USP8	EEHRIKSESTNHEQQSPQSGKVIPDRSTKPV	434	0.893611	0.461094	-2.40389	0.00178331	-1.51027	0.0243879	0.796204	0.293952	-0.0974071	0.961248
P41227	N-alpha-acetyltransferase 10	NAA10	VVLGAIENKVESKGNSPPSSGEACREEKGLA	186	0.596609	0.038089	-1.66585	6.35266e-07	-1.06924	2.24713e-05	0.104948	0.554855	-0.491661	0.0264654
P41236	Protein phosphatase inhibitor 2;Protein phosphatase inhibitor 2-like protein 3	PPP1R2;PPP1R2P3	AAEGLEPKYRIQEQESSGEEDSDLSPEEREK	121	-0.533383	0.0961562	1.23674	1.50586e-05	0.703361	0.00100323	-0.205816	0.297333	0.327567	0.193191
P41236	Protein phosphatase inhibitor 2;Protein phosphatase inhibitor 2-like protein 3	PPP1R2;PPP1R2P3	AEGLEPKYRIQEQESSGEEDSDLSPEEREKK	122	-0.254191	0.24483	1.19444	1.44074e-06	0.94025	1.25775e-05	0.0937337	0.509555	0.347925	0.0471108
P42166	Lamina-associated polypeptide 2, isoform alpha;Thymopoietin;Thymopentin	TMPO	LYEKKLLKLREQGTESRSSTPLPTISSSAEN	156	-1.16307	0.0866586	-0.772107	0.0303698	-1.93518	0.000166071	-0.994855	0.0276427	0.168215	0.865045
P42166	Lamina-associated polypeptide 2, isoform alpha;Thymopoietin;Thymopentin	TMPO	KKLLKLREQGTESRSSTPLPTISSSAENTRQ	159	0.272113	0.415528	-2.06881	5.60658e-07	-1.79669	2.67716e-06	0.331122	0.117041	0.0590083	0.914989
P42166	Lamina-associated polypeptide 2, isoform alpha;Thymopoietin;Thymopentin	TMPO	GTESRSSTPLPTISSSAENTRQNGSNDSDRY	168	1.27567	0.000355606	-2.0699	2.22654e-08	-0.79423	1.83024e-05	0.0731643	0.56556	-1.2025	2.43378e-05
P42166	Lamina-associated polypeptide 2, isoform alpha;Thymopoietin;Thymopentin	TMPO	QKRIDQSKFQETEFLSPPRKVPRLSEKSVEE	424	0.670572	0.510296	-2.84378	0.000163554	-2.17321	0.00122015	0.871464	0.167188	0.200891	0.898926
P42166	Lamina-associated polypeptide 2, isoform alpha;Thymopoietin;Thymopentin	TMPO	PPLPAGTNSKGPPDFSSDEEREPTPVLGSGA	66	-0.00286231	0.990198	0.816335	2.31371e-05	0.813472	3.44534e-05	-0.163424	0.235649	-0.160561	0.394871
P42166	Lamina-associated polypeptide 2, isoform alpha;Thymopoietin;Thymopentin	TMPO	AENTRQNGSNDSDRYSDNEEGKKKEHKKVKS	184	-0.0854443	0.699267	0.918581	6.73076e-06	0.833137	2.06465e-05	-0.0837094	0.539058	0.00173485	0.997187
P42166	Lamina-associated polypeptide 2, isoform alpha;Thymopoietin;Thymopentin	TMPO	GIQPLCPERSHISDQSPLSSKRKALEESESS	351	0.920629	0.0270148	-1.55608	1.28394e-05	-0.635447	0.00630193	0.785274	0.00727869	-0.135355	0.781381
P42575	Caspase-2;Caspase-2 subunit p18;Caspase-2 subunit p13;Caspase-2 subunit p12	CASP2	TDRGVDQQDGKNHAGSPGCEESDAGKEKLPK	340	0.29122	0.154054	-0.621749	9.41408e-05	-0.330529	0.00659209	-0.0390233	0.769206	-0.330243	0.042043
P42679	Megakaryocyte-associated tyrosine-protein kinase	MATK	GAPASVSGQDADGSTSPRSQEP_________	501	-0.0112041	0.974502	0.013864	0.909552	0.00265989	0.983415	-0.124003	0.429894	-0.112799	0.664745
P42684	Abelson tyrosine-protein kinase 2	ABL2	SLAPGFIRGAQASSGSPALPRKQRDKSPSSL	620	-0.057294	0.863115	-0.932945	6.64278e-05	-0.990239	6.05311e-05	0.0303978	0.876722	0.0876919	0.823256
P42694	Probable helicase with zinc finger domain	HELZ	TEPKQVDLESNPQNRSPESRPSVVYPSTKFP	1317	0.312889	0.22126	0.0936873	0.453833	0.406577	0.00758624	0.699843	0.0014583	0.386954	0.057397
P42695	Condensin-2 complex subunit D3	NCAPD3	TLLRNSSAFSYQRQTSNRSEPSGEINIDSSG	517	-1.86704	0.0204396	3.28388	6.06162e-06	1.41684	0.00261908	-0.858012	0.0732338	1.00903	0.0816397
P42696	RNA-binding protein 34	RBM34	RSVQEGENPDDGVRGSPPEDYRLGQVASSLF	28	0.205545	0.690364	0.447104	0.0788392	0.652649	0.0184592	0.561407	0.0774649	0.355863	0.396446
P43243	Matrin-3	MATR3	DGKKEPSDKAVKKDGSASAAAKKKLKKVDKI	705	0.061631	0.819709	-1.53103	5.11078e-07	-1.4694	1.36754e-06	-0.0908328	0.563498	-0.152464	0.485673
P43243	Matrin-3	MATR3	GIDLLKKDKSRKRSYSPDGKESPSDKKSKTD	598	-0.943302	0.0918907	2.40999	6.43329e-06	1.46669	0.000305392	-0.714474	0.0485243	0.228827	0.710657
P43243	Matrin-3	MATR3	VPRDDWEEKRHFRRDSFDDRGPSLNPVLDYD	188	0.135252	0.45978	-0.501551	0.000196979	-0.366299	0.00190798	-0.288985	0.022507	-0.424237	0.00688197
P43243	Matrin-3	MATR3	_______MSKSFQQSSLSRDSQGHGRDLSAA	9	-0.0734696	0.839074	-1.2574	1.55475e-05	-1.33087	1.54331e-05	-0.399214	0.0576503	-0.325744	0.205625
P45973	Chromobox protein homolog 5	CBX5	YKKMKEGENNKPREKSESNKRKSNFSNSADD	85	1.06637	0.448165	-3.69253	0.000266861	-2.62615	0.00290595	1.21632	0.166534	0.149951	0.959949
P45973	Chromobox protein homolog 5	CBX5	SNSADDIKSKKKREQSNDIARGFERGLEPEK	110	-0.184557	0.638622	-1.35215	3.07754e-05	-1.5367	1.79499e-05	-0.0251967	0.922031	0.15936	0.709193
P45973	Chromobox protein homolog 5	CBX5	ENNKPREKSESNKRKSNFSNSADDIKSKKKR	92	0.377953	0.755538	-2.73887	0.000461669	-2.36091	0.00144887	0.757579	0.281663	0.379626	0.788801
P46013	Antigen KI-67	MKI67	VEVKAQSLVISPPAPSPRKTPVASDQRRRSC	584	0.204023	0.909901	2.43773	0.00745689	2.64176	0.00531264	-0.168217	0.872961	-0.37224	0.871923
P46013	Antigen KI-67	MKI67	ESAKQTPAPAASVTGSRRRPRAPRESAQAIE	2783	1.78441	0.0312974	-4.6117	7.89736e-07	-2.82729	3.94408e-05	1.86022	0.00294496	0.0758066	0.959949
P46013	Antigen KI-67	MKI67	EELVAAGKTTKIPCDSPQSDPVDTPTSTKQR	1253	1.95041	0.00924022	1.52918	0.000619664	3.47959	2.96105e-06	1.0297	0.0235056	-0.920709	0.0724026
P46013	Antigen KI-67	MKI67	GTPVQKLDLTENLTGSKRRPQTPKEEAQALE	1329	0.812784	0.592089	-3.60696	0.000508138	-2.79418	0.00303402	0.925744	0.324942	0.11296	0.962021
P46013	Antigen KI-67	MKI67	GTPVQKLDQPGNLPGSNRRLQTRKEKAQALE	1815	-0.137973	0.787722	-1.79422	1.68584e-05	-1.93219	1.49499e-05	0.097679	0.745768	0.235652	0.617326
P46013	Antigen KI-67	MKI67	GVKEEVLPVGKLTQTSGKTTQTHRETAGDGK	2022	1.10879	0.0203093	-4.15012	3.73328e-08	-3.04133	6.7221e-07	1.26319	0.00102841	0.154396	0.776799
P46013	Antigen KI-67	MKI67	PAKMKTPVQYSQQQNSPQKHKNKDLYTTGRR	357	-0.0402791	0.939795	1.56639	3.09168e-05	1.52611	5.34017e-05	-0.00049904	0.998093	0.0397801	0.959949
P46013	Antigen KI-67	MKI67	EAVAAGKTTKMPCESSPPESADTPTSTRRQP	1376	1.3191	0.00569086	0.747638	0.00256594	2.06673	3.46717e-06	0.602904	0.0273756	-0.716192	0.0266513
P46013	Antigen KI-67	MKI67	QKHKNKDLYTTGRRESVNLGKSEGFKAGDKT	374	-0.173888	0.739664	-2.25282	4.18423e-06	-2.42671	4.22127e-06	0.200918	0.518893	0.374806	0.353485
P46013	Antigen KI-67	MKI67	RSQHDILQMICSKRRSGASEANLIVAKSWAD	648	1.6807	0.24483	-4.4536	9.51157e-05	-2.7729	0.00271783	1.94822	0.0439062	0.267526	0.911773
P46013	Antigen KI-67	MKI67	SSKSQTEVPKRGGRKSGNLPSKRVSISRSQH	621	1.77141	0.0276482	-4.87822	4.16167e-07	-3.10681	1.54331e-05	2.12021	0.00118485	0.348793	0.659986
P46013	Antigen KI-67	MKI67	VACKSSQPDPDKNPASSKRRLKTSLGKVGVK	1628	0.515792	0.524267	-2.87762	2.79919e-05	-2.36183	0.000157437	0.714695	0.155432	0.198902	0.865428
P46063	ATP-dependent DNA helicase Q1	RECQL	NSGNFQKKAANMLQQSGSKNTGAKKRKIDDA	634	0.697082	0.508026	-2.62531	0.000358005	-1.92823	0.00307905	0.677515	0.296827	-0.0195662	0.991687
P46087	Probable 28S rRNA (cytosine(4447)-C(5))-methyltransferase	NOP2	KRKKSQSRGNSQLLLS_______________	812	-0.00126632	0.998364	-2.1156	0.000160352	-2.11687	0.000206259	0.0510191	0.919669	0.0522854	0.96278
P46087	Probable 28S rRNA (cytosine(4447)-C(5))-methyltransferase	NOP2	QKQNDTPKGPQPPTVSPIRSSRPPPAKRKKS	786	0.430446	0.400664	1.62669	6.56958e-05	2.05713	1.74716e-05	0.270164	0.400741	-0.160282	0.809542
P46087	Probable 28S rRNA (cytosine(4447)-C(5))-methyltransferase	NOP2	NAPPKGTDTQTPAVLSPSKTQATLKPKDHHQ	732	0.111933	0.892704	0.525759	0.154311	0.637692	0.0953284	-0.0736699	0.882619	-0.185603	0.865428
P46087	Probable 28S rRNA (cytosine(4447)-C(5))-methyltransferase	NOP2	LSSRARKRAAKRRLGSVEAPKTNKSPEAKPL	58	0.342725	0.632415	-2.31162	4.96856e-05	-1.9689	0.000207731	0.00375093	0.994238	-0.338974	0.639259
P46087	Probable 28S rRNA (cytosine(4447)-C(5))-methyltransferase	NOP2	ELSTVPSVTKTQASSSFQDSSQPAGKAEGIR	675	2.70933	0.154249	-2.51567	0.017111	0.19366	0.839481	-0.480365	0.698953	-3.18969	0.0362313
P46100	Transcriptional regulator ATRX	ATRX	KQKLSVPVRKKDKRNSSDSAIDNPKPNKLPK	703	0.0103876	0.988528	-0.947343	0.00360904	-0.936955	0.0043212	0.128335	0.713494	0.117947	0.882012
P46100	Transcriptional regulator ATRX	ATRX	NKLPKSKQSETVDQNSDSDEMLAILKEVSRM	729	-0.197945	0.446945	1.37069	1.59506e-06	1.17275	8.47704e-06	0.0241322	0.889637	0.222077	0.293717
P46100	Transcriptional regulator ATRX	ATRX	TPLRRPTETNPVTSNSDEECNETVKEKQKLS	677	-0.352841	0.143062	1.69918	2.30583e-07	1.34634	2.05453e-06	-0.0569556	0.715434	0.295885	0.117036
P46379	Large proline-rich protein BAG6	BAG6	PLPEEPMEVQGAERASPEPQRENASPAPGTT	964	-0.32423	0.0708082	1.22088	2.50211e-07	0.896653	3.62709e-06	-0.191904	0.0865611	0.132326	0.36618
P46379	Large proline-rich protein BAG6	BAG6	QGAERASPEPQRENASPAPGTTAEEAMSRGP	973	-0.710021	0.00853778	1.31657	1.08766e-06	0.606546	0.000370182	-0.412265	0.014021	0.297755	0.106151
P46379	Large proline-rich protein BAG6	BAG6	LRSDIQKRLQEDPNYSPQRFPNAQRAFADDP	1117	-0.404974	0.237755	-0.387049	0.0358926	-0.792023	0.000825725	-0.173442	0.429894	0.231533	0.442639
P46937	Transcriptional coactivator YAP1	YAP1	LLRQAMRNINPSTANSPKCQELALRSQLPTL	340	0.387259	0.527178	-2.12982	3.27457e-05	-1.74257	0.000186935	0.487349	0.200259	0.10009	0.921217
P46937	Transcriptional coactivator YAP1	YAP1	SFFKPPEPKSHSRQASTDAGTAGALTPQHVR	109	-0.197061	0.758694	1.69429	0.000151502	1.49722	0.000440483	-0.181867	0.640095	0.015194	0.987149
P46937	Transcriptional coactivator YAP1	YAP1	SQSAPVKQPPPLAPQSPQGGVMGGSNSNQQQ	289	0.751758	0.174696	-0.508242	0.0765912	0.243516	0.381727	0.74396	0.0430318	-0.0077975	0.993358
P46939	Utrophin	UTRN	TLEELRRNMRSQPLTSPESRTARGGSQMDVL	1405	0.534351	0.132565	-1.50484	7.78365e-06	-0.970487	0.000246458	0.589593	0.0178937	0.0552422	0.928082
P47712	Cytosolic phospholipase A2;Phospholipase A2;Lysophospholipase	PLA2G4A	ESIEYRRQNPSRCSVSLSNVEARRFFNKEFL	729	-0.340993	0.548898	1.03057	0.00304062	0.689581	0.0270883	-0.504355	0.156343	-0.163362	0.833716
P47712	Cytosolic phospholipase A2;Phospholipase A2;Lysophospholipase	PLA2G4A	ENITTKHIVSNDSSDSDDESHEPKGTENEDA	437	-0.243407	0.395058	0.830028	0.000128573	0.586621	0.00160171	-0.121278	0.505728	0.122129	0.696169
P47914	60S ribosomal protein L29	RPL29	VPAQAPKRTQAPTKASE______________	158	0.172691	0.532718	0.178413	0.189556	0.351104	0.0214308	-0.0656707	0.713494	-0.238361	0.287077
P47974	Zinc finger protein 36, C3H1 type-like 2	ZFP36L2	TALLNKENKFRDRSFSENGDRSQHLLHLQQQ	125	-0.494955	0.579041	1.41939	0.00642377	0.924438	0.0509179	-1.09609	0.0578401	-0.601131	0.437197
P48634	Protein PRRC2A	PRRC2A	PGVHPSGLVPRERSDSGGSSSEPFDRHAPAM	761	-0.133654	0.517716	0.743522	2.51708e-05	0.609868	0.000145023	-0.549913	0.00150574	-0.41626	0.0137904
P48634	Protein PRRC2A	PRRC2A	GKLGGPKETPPNGNLSPAPRLRRDYSYERVG	1004	0.221659	0.610461	-1.13382	0.000256051	-0.912166	0.00131341	0.347559	0.196022	0.1259	0.831706
P48634	Protein PRRC2A	PRRC2A	LTGPEAGRKPARGVGSGGQGPPPPRRESRTE	908	0.252401	0.725034	-2.17467	6.04713e-05	-1.92227	0.00019315	0.392102	0.354167	0.139702	0.895009
P48634	Protein PRRC2A	PRRC2A	SGVFRTQRVDLYQQASPPDALRWIPKPWERT	2113	-0.519881	0.315634	-1.33275	0.000326684	-1.85263	4.34449e-05	0.653373	0.0548364	1.17325	0.0081305
P48651	Phosphatidylserine synthase 1	PTDSS1	EISWHHRKGTKGSEDSPPKHAGNNESHSSRR	442	0.515793	0.215704	-0.0217086	0.916129	0.494085	0.0306985	0.391657	0.137256	-0.124137	0.828372
P48730	Casein kinase I isoform delta	CSNK1D	RHSRNPATRGLPSTASGRLRGTQEVAPPTPL	331	0.320114	0.618386	-1.83185	0.000133759	-1.51173	0.000620958	0.248538	0.542203	-0.0715755	0.956736
P48960	CD97 antigen;CD97 antigen subunit alpha;CD97 antigen subunit beta	CD97	TTSGTGHNQTRALRASESGI___________	831	0.719377	0.0847939	-0.106642	0.589433	0.612735	0.00979842	-0.408095	0.113745	-1.12747	0.00254773
P49006	MARCKS-related protein	MARCKSL1	FKRNRKEGGGDSSASSPTEEEQEQGEIGACS	120	0.00374006	0.99396	0.542531	0.0277337	0.546271	0.028716	-0.382841	0.180011	-0.386581	0.299336
P49006	MARCKS-related protein	MARCKSL1	KAPRGDVTAEEAAGASPAKANGQENGHVKSN	22	1.17143	0.05982	-1.56184	0.000297191	-0.390406	0.200328	1.73885	0.00101286	0.56742	0.240543
P49023	Paxillin	PXN	ERCWAAGWPRDGGRSSPGGQDEGGFMAQGKT	303	-0.332709	0.0413575	0.233284	0.00913645	-0.0994254	0.207022	-0.435637	0.00122538	-0.102928	0.452183
P49023	Paxillin	PXN	SAKTSSVSNPQDSVGSPCSRVGEEEHVYSFP	106	0.350634	0.745275	-1.75935	0.00354447	-1.40872	0.013152	0.534887	0.393797	0.184253	0.909575
P49447	Cytochrome b561	CYB561	EQALSMDFKTLTEGDSPGSQ___________	247	0.867953	0.191868	-2.03421	9.49476e-05	-1.16625	0.00436159	0.0995427	0.823249	-0.76841	0.14329
P49454	Centromere protein F	CENPF	SMPSERSECRLEADQSPKNSAILQNRVDSLE	821	0.501219	0.225936	-0.955178	0.000697726	-0.453959	0.0429117	0.659647	0.0226966	0.158428	0.747271
P49454	Centromere protein F	CENPF	VPGPSPIPSVTEKRLSSGQNKASGKRQRSSG	2922	0.573635	0.0944351	-1.31015	1.57615e-05	-0.736519	0.00112584	0.683861	0.00716715	0.110226	0.801327
P49454	Centromere protein F	CENPF	VQQALRSEMTDNQNNSKSEAGGLKQEIMTLK	1121	3.91757	0.00171712	-3.6919	1.59959e-05	0.225668	0.634222	-1.03256	0.0902354	-4.95013	6.12346e-05
P49454	Centromere protein F	CENPF	EPTTKSVPVNNLPERSPTDSPREGLRVKRGR	3079	2.15306	0.000459176	0.967971	0.000528438	3.12103	3.76779e-07	1.78721	5.77377e-05	-0.365847	0.26721
P49454	Centromere protein F	CENPF	TAGGSRSQKVKVAQRSPVDSGTILREPTTKS	3054	0.114245	0.720904	-0.257474	0.0934276	-0.14323	0.341342	0.082242	0.676438	-0.0320027	0.959949
P49585	Choline-phosphate cytidylyltransferase A	PCYT1A	SPANLSRHKAAAYDISEDEED__________	362	-0.336034	0.0657149	1.09362	5.89777e-07	0.757587	1.23521e-05	-0.184938	0.102717	0.151096	0.299336
P49593	Protein phosphatase 1F	PPM1F	LPSSLPEPETQAPPRS_______________	454	1.21136	0.0204396	-2.52155	1.75571e-06	-1.31019	0.000269912	0.579382	0.0629598	-0.631978	0.0942101
P49674	Casein kinase I isoform epsilon	CSNK1E	VASTPASRIQPAGNTSPRAISRVDRERKVSM	363	-0.262047	0.0978544	1.08581	2.58811e-07	0.823763	3.04689e-06	-0.365132	0.0031929	-0.103085	0.453185
P49736	DNA replication licensing factor MCM2	MCM2	___MAESSESFTMASSPAQRRRGNDPLTSSP	13	-0.209277	0.503571	0.444325	0.0114575	0.235048	0.138233	-0.23503	0.225024	-0.0257531	0.960941
P49736	DNA replication licensing factor MCM2	MCM2	AGRGLGRMRRGLLYDSDEEDEERPARKRRQV	139	-0.199194	0.461216	0.693711	0.000322828	0.494517	0.00336752	-0.417147	0.0248934	-0.217953	0.329382
P49736	DNA replication licensing factor MCM2	MCM2	SSPAQRRRGNDPLTSSPGRSSRRTDALTSSP	27	-1.03073	0.0269707	0.731696	0.00477427	-0.299035	0.175672	-1.00895	0.00329593	0.0217806	0.975378
P49750	YLP motif-containing protein 1	YLPM1	RPGSSREKVPGGLQGSQDRGAAGSRERGPPR	1100	-0.142973	0.689126	-0.408981	0.0265058	-0.551955	0.00647762	-0.100229	0.654086	0.0427443	0.949281
P49756	RNA-binding protein 25	RBM25	HRPKIGLSLKLGASNSPGQPNSVKRKKLPVD	677	-0.503292	0.0180324	1.99447	2.36492e-08	1.49118	3.76779e-07	-0.316306	0.0200488	0.186986	0.226818
P49790	Nuclear pore complex protein Nup153	NUP153	GSNGKNVFSSSGTSFSGRKIKTAVRRRK___	1463	-0.188439	0.866244	-2.75308	0.000174568	-2.94152	0.000145023	-0.147179	0.822613	0.0412593	0.978973
P49792	E3 SUMO-protein ligase RanBP2	RANBP2	LVGPPLAETVFTPKTSPENVQDRFALVTPKK	1400	0.346227	0.398141	-0.503464	0.0234399	-0.157237	0.437767	-0.0567292	0.833424	-0.402956	0.214868
P49792	E3 SUMO-protein ligase RanBP2	RANBP2	KCIACQNPGKQNQTTSAVSTPASSETSKAPK	1640	0.677636	0.138727	-3.169	2.58811e-07	-2.49136	2.46663e-06	0.677173	0.0289164	-0.000463088	0.999997
P49815	Tuberin	TSC2	KSLRIARPPKQGLNNSPPVKEFKESSAAEAF	960	0.570235	0.15906	-0.899253	0.000874012	-0.329018	0.11561	0.64303	0.022507	0.0727952	0.91472
P49848	Transcription initiation factor TFIID subunit 6	TAF6	APGTPKANGSQPNSGSPQPAP__________	672	0.373774	0.0430517	0.39885	0.000770498	0.772623	1.06327e-05	0.303586	0.0157179	-0.0701879	0.733576
P49916	DNA ligase 3	LIG3	KAVVQAKLTTTGQVTSPVKGASFVTSTNPRK	210	-0.231157	0.547824	0.668545	0.00388004	0.437387	0.0353336	-0.0999768	0.690316	0.131181	0.783021
P49916	DNA ligase 3	LIG3	SGFSAKPNNSGEAPSSPTPKRSLSSSKCDPR	242	0.0570489	0.790335	1.09981	1.06869e-06	1.15686	1.50758e-06	0.0247766	0.84761	-0.0322723	0.921217
P50402	Emerin	EMD	YEESYFTTRTYGEPESAGPSRAVRQSVTSFP	110	0.320767	0.690504	-2.66183	3.77628e-05	-2.34106	0.000130865	-0.000841042	0.998093	-0.321608	0.710457
P50613	Cyclin-dependent kinase 7	CDK7	GVLKLADFGLAKSFGSPNRAYTHQVVTRWYR	164	-0.163184	0.363311	0.953677	1.52474e-06	0.790493	9.76138e-06	-0.0572457	0.623996	0.105939	0.519194
P50747	Biotin--protein ligase;Biotin--[methylmalonyl-CoA-carboxytransferase] ligase;Biotin--[propionyl-CoA-carboxylase [ATP-hydrolyzing]] ligase;Biotin--[methylcrotonoyl-CoA-carboxylase] ligase;Biotin--[acetyl-CoA-carboxylase] ligase	HLCS	DDPKALGEEPKQRRGSASGSEPAGDSDRGGG	79	-0.558259	0.191868	0.873737	0.00151222	0.315478	0.150282	-0.514289	0.063732	0.0439699	0.959949
P50750	Cyclin-dependent kinase 9	CDK9	LTSMFEYLAPPRRKGSQITQQSTNQSRNPAT	347	-0.630378	0.139104	0.0279068	0.89422	-0.602471	0.0132371	-0.350487	0.189788	0.279891	0.45355
P51153	Ras-related protein Rab-13	RAB13	SSLARDILLKSGGRRSGNGNKPPSTDLKTCD	178	0.487419	0.0388169	-1.09756	2.95894e-06	-0.610142	0.000274085	0.0143713	0.924462	-0.473048	0.0117035
P51397	Death-associated protein 1	DAP	_____________MSSPPEGKLETKAGHPPA	3	-0.347217	0.139456	0.336752	0.0114236	-0.0104647	0.929756	-0.324628	0.0380981	0.0225893	0.959949
P51608	Methyl-CpG-binding protein 2	MECP2	SEGSGSAPAVPEASASPKQRRSIIRDRGPMY	80	0.388331	0.0388169	0.685717	1.76574e-05	1.07405	1.43311e-06	0.280294	0.0235934	-0.108037	0.508796
P51692	Signal transducer and activator of transcription 5B	STAT5B	LYNEQRLVREANNGSSPAGSLADAMSQKHLQ	128	0.753474	0.0317371	-1.88094	1.02764e-06	-1.12747	5.9961e-05	0.199874	0.337797	-0.5536	0.0372028
P51812	Ribosomal protein S6 kinase alpha-3	RPS6KA3	KGAMAATYSALNRNQSPVLEPVGRSTLAQRR	715	1.09014	0.00445689	-2.45251	1.31028e-07	-1.36236	1.11542e-05	-0.0240409	0.909278	-1.11418	0.000609154
P51825	AF4/FMR2 family member 1	AFF1	APPEAPHPGKRSCQKSPAQQEPPQRQTVGTK	588	-0.442203	0.163715	0.640426	0.00164095	0.198223	0.217967	-0.138772	0.495811	0.303431	0.234268
P51858	Hepatoma-derived growth factor	HDGF	EKGALKRRAGDLLEDSPKRPKEAENPEGEEK	165	-0.156885	0.423565	0.634696	5.94687e-05	0.477811	0.000547054	-0.191324	0.121945	-0.0344392	0.914989
P51858	Hepatoma-derived growth factor	HDGF	WEIENNPTVKASGYQSSQKKSCVEEPEPEPE	102	0.456518	0.418184	-3.00563	1.52333e-06	-2.54911	8.55311e-06	0.254672	0.476921	-0.201846	0.769939
P51858	Hepatoma-derived growth factor	HDGF	EIENNPTVKASGYQSSQKKSCVEEPEPEPEA	103	-1.07008	0.109817	-0.145417	0.652649	-1.2155	0.00334434	-1.03541	0.023804	0.034669	0.973615
P51858	Hepatoma-derived growth factor	HDGF	LPMEVEKNSTPSEPGSGRGPPQEEEEEEDEE	206	-0.284692	0.206087	0.327347	0.0109194	0.0426551	0.703868	-0.263264	0.0707864	0.0214282	0.959949
P51858	Hepatoma-derived growth factor	HDGF	EAAEGDGDKKGNAEGSSDEEGKLVIDEPAKE	132	-0.195157	0.481959	0.759657	0.000198031	0.5645	0.00171222	-0.215644	0.213025	-0.0204872	0.962023
P51858	Hepatoma-derived growth factor	HDGF	AAEGDGDKKGNAEGSSDEEGKLVIDEPAKEK	133	-0.150355	0.460414	0.601224	0.000118634	0.450868	0.00103032	-0.283421	0.037292	-0.133065	0.457168
P51991	Heterogeneous nuclear ribonucleoprotein A3	HNRNPA3	__MEVKPPPGRPQPDSGRRRRRRGEEGHDPK	14	0.236481	0.814946	-1.42229	0.00692326	-1.18581	0.0189317	0.119059	0.841671	-0.117422	0.945672
P51991	Heterogeneous nuclear ribonucleoprotein A3	HNRNPA3	YGPMKGGSFGGRSSGSPYGGGYGSGGGSGGY	358	0.311523	0.570665	-1.56151	0.000151838	-1.24999	0.00084598	0.154147	0.667305	-0.157375	0.834123
P52292	Importin subunit alpha-1	KPNA2	MLKRRNVSSFPDDATSPLQENRNNQGTVNWS	62	0.125611	0.891377	-1.40566	0.00419429	-1.28005	0.00784643	0.183834	0.727427	0.0582233	0.962023
P52594	Arf-GAP domain and FG repeat-containing protein 1	AGFG1	DSAPTLHLNKGTPSQSPVVGRSQGQQQEKKQ	181	0.250432	0.158636	1.25006	2.42608e-07	1.50049	2.34011e-07	0.0442278	0.703551	-0.206205	0.139691
P52701	DNA mismatch repair protein Msh6	MSH6	__MSRQSTLYSFFPKSPALSDANKASARASR	14	0.54396	0.138447	-1.70631	4.06326e-06	-1.16235	9.55508e-05	0.515932	0.0356839	-0.0280282	0.961424
P52732	Kinesin-like protein KIF11	KIF11	_________MASQPNSSAKKKEEKGKNIQVV	7	0.236972	0.544442	-2.42793	5.29657e-07	-2.19096	1.99664e-06	0.530647	0.0397673	0.293676	0.365956
P52732	Kinesin-like protein KIF11	KIF11	________MASQPNSSAKKKEEKGKNIQVVV	8	-0.0705074	0.918056	-1.61376	0.000186113	-1.68427	0.000178702	0.0809949	0.833424	0.151502	0.858825
P52948	Nuclear pore complex protein Nup98-Nup96;Nuclear pore complex protein Nup98;Nuclear pore complex protein Nup96	NUP98	ALDQRFSRLPSKADTSQEICSPRLPISASHS	1023	1.13747	0.108496	0.610052	0.0891101	1.74753	0.000474858	-1.30801	0.0107608	-2.44549	0.000662831
P52948	Nuclear pore complex protein Nup98-Nup96;Nuclear pore complex protein Nup98;Nuclear pore complex protein Nup96	NUP98	FSRLPSKADTSQEICSPRLPISASHSSKTRS	1028	-1.09989	0.241849	-0.366706	0.427423	-1.46659	0.00856365	0.0548421	0.931609	1.15473	0.121546
P52948	Nuclear pore complex protein Nup98-Nup96;Nuclear pore complex protein Nup98;Nuclear pore complex protein Nup96	NUP98	SNLFSPVNRDSENLASPSEYPENGERFSFLS	623	-0.678946	0.00579013	1.21613	7.89736e-07	0.537179	0.000363443	-0.0946674	0.471668	0.584279	0.00228929
P52948	Nuclear pore complex protein Nup98-Nup96;Nuclear pore complex protein Nup98;Nuclear pore complex protein Nup96	NUP98	IKKLVLKNLNNSNLFSPVNRDSENLASPSEY	612	-1.32803	0.0958234	-0.726027	0.0736418	-2.05406	0.000346893	-0.402858	0.419165	0.925176	0.133905
P52948	Nuclear pore complex protein Nup98-Nup96;Nuclear pore complex protein Nup98;Nuclear pore complex protein Nup96	NUP98	QMALNGKPAPPPQSQSPEVEQLGRVVELDSD	934	0.489868	0.0787479	-0.566513	0.0012922	-0.0766455	0.573138	0.367378	0.0413275	-0.12249	0.671621
P53396	ATP-citrate synthase	ACLY	NASGSTSTPAPSRTASFSESRADEVAPAKKA	455	0.146673	0.466173	0.822254	1.1054e-05	0.968926	5.5532e-06	-0.649205	0.000482035	-0.795877	0.000305117
P53621	Coatomer subunit alpha;Xenin;Proxenin	COPA	TVRVWDISGLRKKNLSPGAVESDVRGITGVD	173	1.08933	0.00737733	-3.52809	2.40021e-08	-2.43877	6.32976e-07	0.473788	0.0397673	-0.615539	0.0278308
P53814	Smoothelin	SMTN	RKAMIEKLEKEGAAGSPGGPRAAVQRSTSFG	779	0.30214	0.819709	-2.85074	0.000528438	-2.5486	0.00130967	0.926003	0.215835	0.623864	0.596098
P53814	Smoothelin	SMTN	VNKLLSGPKETPAAQSPTRGPSDTKRADVAG	277	-0.124828	0.634581	-1.26158	2.66846e-06	-1.3864	2.49911e-06	0.475859	0.0106673	0.600687	0.00635876
P53814	Smoothelin	SMTN	PPPSPPKTTSPEPQESPTLPSTEGQVVNKLL	251	1.4345	0.000449797	-0.304897	0.0302332	1.12961	1.13063e-05	2.1456	1.81454e-06	0.711094	0.00278607
P53985	Monocarboxylate transporter 1	SLC16A1	IDVAGKPNEVTKAAESPDQKDTDGGPKEEES	483	0.697675	0.202626	-2.4691	5.30306e-06	-1.77142	8.57458e-05	0.486601	0.157961	-0.211075	0.745387
P53999	Activated RNA polymerase II transcriptional coactivator p15	SUB1	KTGETSRALSSSKQSSSSRDDNMFQIGKMRY	56	0.842828	0.0062657	-1.144	6.35167e-06	-0.301173	0.0336809	-0.262738	0.111762	-1.10557	0.000196989
P54259	Atrophin-1	ATN1	PALRTLSEYARPHVMSPGNRNHPFYVPLGAV	896	-0.131395	0.797613	-0.995658	0.00110497	-1.12705	0.000585088	-0.072777	0.814966	0.0586176	0.949281
P54278	Mismatch repair endonuclease PMS2;Protein PMS2CL	PMS2;PMS2CL	HAADLEKPMVEKQDQSPSLRTGEEKKDVSIS	403	1.19366	0.000449797	-3.20457	4.37601e-09	-2.01091	1.55655e-07	1.13647	2.38398e-05	-0.0571957	0.861944
P54725	UV excision repair protein RAD23 homolog A	RAD23A	AREDKSPSEESAPTTSPESVSGSVPSSGSSG	133	1.3423	0.00053706	-2.10794	1.01906e-07	-0.765639	0.0001639	0.469052	0.0131125	-0.873252	0.000850935
P54727	UV excision repair protein RAD23 homolog B	RAD23B	QEKPAEKPAETPVATSPTATDSTSGDSSRSN	160	0.564859	0.132944	-1.1008	0.000118401	-0.53594	0.0123663	0.346053	0.140958	-0.218806	0.525437
P55196	Afadin	MLLT4	CRDAKEKRSKSQDADSPGSSGAPENLTFKER	1779	0.92042	0.014936	-0.804577	0.00054556	0.115843	0.494227	0.831997	0.0024483	-0.088423	0.858825
P55196	Afadin	MLLT4	RADHRSSPNVANQPPSPGGKSAYASGTTAKI	1182	0.391602	0.404583	1.90836	1.10679e-05	2.29996	4.73974e-06	-0.122441	0.689783	-0.514044	0.161729
P55198	Protein AF-17	MLLT6	GGGSGFISGRRSRSASPSTQQEKHPTHHERG	222	-0.189354	0.670533	1.96485	4.48425e-06	1.7755	1.46501e-05	-0.429774	0.112448	-0.240419	0.54821
P55210	Caspase-7;Caspase-7 subunit p20;Caspase-7 subunit p11	CASP7	MADDQGCIEEQGVEDSANEDSVDAKPDRSSF	16	-0.0462447	0.96563	0.625624	0.12776	0.579379	0.162709	0.149007	0.781496	0.195252	0.871923
P55265	Double-stranded RNA-specific adenosine deaminase	ADAR	VTGASLRRTMLLLSRSPEAQPKTLPLTGSTF	825	0.969323	0.0461811	-0.767671	0.00542165	0.201651	0.387011	0.91438	0.00851238	-0.0549428	0.9546
P55735	Protein SEC13 homolog	SEC13	QWVCISDVNKGQGSVSASVTEGQQNEQ____	311	0.235409	0.658567	-0.59047	0.0328093	-0.355061	0.175484	-0.644215	0.055398	-0.879624	0.0335617
P55884	Eukaryotic translation initiation factor 3 subunit B	EIF3B	DLKKYSKIFEQKDRLSQSKASKELVERRRTM	738	0.432766	0.60022	-1.97425	0.000488499	-1.54148	0.00280392	-0.0514796	0.925265	-0.484245	0.520271
P55884	Eukaryotic translation initiation factor 3 subunit B	EIF3B	QGEAPGEQARDERSDSRAQAVSEDAGGNEGR	119	-0.800501	0.00767607	2.31616	5.09884e-08	1.51566	1.56711e-06	-0.845792	0.000419573	-0.0452901	0.914989
P56192	Methionine--tRNA ligase, cytoplasmic	MARS	GVLALRPYLQKQPQPSPAEGRAVTNEPEEEE	209	0.576142	0.133689	-1.6368	7.54714e-06	-1.06066	0.000232639	0.0493828	0.844298	-0.526759	0.0766434
P57682	Krueppel-like factor 3	KLF3	PSVIVQPGKRPLPVESPDTQRKRRIHRCDYD	250	-0.171426	0.481959	0.788212	5.93924e-05	0.616786	0.000422468	-0.193876	0.203691	-0.0224507	0.959949
P57740	Nuclear pore complex protein Nup107	NUP107	_____MDRSGFGEISSPVIREAEVTRTARKQ	11	0.866438	0.138854	-2.57621	6.11209e-06	-1.70977	0.0001639	1.28138	0.00451295	0.414937	0.402347
P58107	Epiplakin	EPPK1	LAQAQAQARAEAEAGSPRPDPREALRAATME	2508	0.874407	0.00459879	-2.89354	1.55407e-08	-2.01913	3.33069e-07	1.14428	5.1503e-05	0.269875	0.178596
P60468	Protein transport protein Sec61 subunit beta	SEC61B	PGPTPSGTNVGSSGRSPSKAVAARAAGSTVR	17	0.0214326	0.941016	1.18577	3.1719e-06	1.2072	4.76674e-06	-0.0234904	0.8874	-0.0449231	0.911773
P60981	Destrin	DSTN	_____________MASGVQVADEVCRIFYDM	3	0.892847	0.332638	-0.273094	0.542132	0.619753	0.186576	0.5511	0.343398	-0.341747	0.755802
P61006	Ras-related protein Rab-8A	RAB8A	ARDIKAKMDKKLEGNSPQGSNQGVKITPDQQ	181	0.167505	0.59146	-1.07634	3.50703e-05	-0.908838	0.000160488	0.077769	0.700168	-0.0897359	0.833068
P61006	Ras-related protein Rab-8A	RAB8A	KAKMDKKLEGNSPQGSNQGVKITPDQQKRSS	185	0.00825879	0.98375	-0.639147	0.000698487	-0.630888	0.000905486	-0.0768219	0.675669	-0.0850807	0.819024
P61247	40S ribosomal protein S3a	RPS3A	AKVERADGYEPPVQESV______________	263	0.106855	0.783675	-0.645005	0.00311944	-0.53815	0.00962411	-0.275397	0.217144	-0.382252	0.173125
P61978	Heterogeneous nuclear ribonucleoprotein K	HNRNPK	GGRPMPPSRRDYDDMSPRRGPPPPPPGRGGR	284	0.294071	0.231034	-0.714504	0.0001395	-0.420432	0.00507277	0.310927	0.0544766	0.0168555	0.96365
P62070	Ras-related protein R-Ras2	RRAS2	LVRVIRKFQEQECPPSPEPTRKEKDKKGCHC	186	-0.268532	0.320207	0.579903	0.00110141	0.311372	0.0346426	-0.115838	0.505728	0.152694	0.54821
P62263	40S ribosomal protein S14	RPS14	MKIGRIEDVTPIPSDSTRRKGGRRGRRL___	139	0.536218	0.302385	-1.44739	0.000190589	-0.911176	0.00443195	-0.265883	0.424468	-0.8021	0.0525527
P62491	Ras-related protein Rab-11A	RAB11A	IVSQKQMSDRRENDMSPSNNVVPIHVPPTTE	190	0.720909	0.155184	-2.82356	1.15477e-06	-2.10265	1.47425e-05	0.495322	0.121807	-0.225587	0.677347
P62857	40S ribosomal protein S28	RPS28	PIKLARVTKVLGRTGSQGQCTQVRVEFMDDT	23	0.707784	0.0639107	2.57987	2.5739e-07	3.28766	1.69245e-07	-0.560804	0.0270317	-1.26859	0.000754381
P62888	60S ribosomal protein L30	RPL30	______MVAAKKTKKSLESINSRLQLVMKSG	10	0.299527	0.139104	-0.947756	3.88174e-06	-0.64823	8.92421e-05	-0.355176	0.0140918	-0.654702	0.00100806
P62995	Transformer-2 protein homolog beta	TRA2B	HTPTPGIYMGRPTYGSSRRRDYYDRGYDRGY	215	1.86765	0.0101169	-3.69102	9.17267e-07	-1.82337	0.000201212	1.69813	0.00165456	-0.169526	0.856852
P63165	Small ubiquitin-related modifier 1	SUMO1	______________MSDQEAKPSTEDLGDKK	2	-0.198448	0.257276	0.830908	3.79178e-06	0.632459	4.13707e-05	-0.228304	0.0489156	-0.0298553	0.920117
P67809	Nuclease-sensitive element-binding protein 1	YBX1	DGKETKAADPPAENSSAPEAEQGGAE_____	314	0.00273956	0.989984	1.00797	1.32064e-06	1.01071	2.39014e-06	-0.302358	0.0195821	-0.305097	0.0378025
P67809	Nuclease-sensitive element-binding protein 1	YBX1	QQNYQNSESGEKNEGSESAPEGQAQQRRPYR	174	-0.840723	0.0239914	1.5613	5.16817e-06	0.72058	0.00151092	-0.699734	0.00723604	0.140989	0.721634
P67809	Nuclease-sensitive element-binding protein 1	YBX1	NYQNSESGEKNEGSESAPEGQAQQRRPYRRR	176	-0.0641646	0.839074	0.774961	0.000196581	0.710796	0.00044043	-0.342099	0.0609053	-0.277935	0.216914
P67809	Nuclease-sensitive element-binding protein 1	YBX1	RRRGPPRNYQQNYQNSESGEKNEGSESAPEG	165	-0.761999	0.00548095	2.20633	3.36561e-08	1.44433	1.13568e-06	-0.781016	0.000329069	-0.019016	0.960941
P67809	Nuclease-sensitive element-binding protein 1	YBX1	RGPPRNYQQNYQNSESGEKNEGSESAPEGQA	167	-0.787181	0.00746051	2.04799	9.9398e-08	1.26081	4.12631e-06	-0.645519	0.0019539	0.141662	0.546741
P67809	Nuclease-sensitive element-binding protein 1	YBX1	PPYYMRRPYGRRPQYSNPPVQGEVMEGADNQ	209	-0.534212	0.189868	0.620753	0.00850304	0.0865413	0.670762	-0.976924	0.00285972	-0.442712	0.169524
Q71DI3	Histone H3.2;Histone H3.1t;Histone H3.1;Histone H3	HIST2H3A;HIST3H3;HIST1H3A;HIST2H3PS2	GKAPRKQLATKAARKSAPATGGVKKPHRYRP	29	1.65699	0.0873582	-4.46868	3.77232e-06	-2.8117	0.000151931	0.525013	0.379845	-1.13197	0.129725
P78312	Protein FAM193A	FAM193A	HIKDEKSNPTPMEPTSPGEHQQNSKLVLAES	1129	0.587249	0.392957	-0.60318	0.0846625	-0.0159305	0.964455	0.374768	0.384268	-0.212481	0.812552
P78316	Nucleolar protein 14	NOP14	NVFRDKRFGEYNSNMSPEEKMMKRFALEQQR	96	0.509413	0.0189055	0.113408	0.245624	0.622821	0.000103255	0.797993	0.000109583	0.28858	0.0633876
P78332	RNA-binding protein 6	RBM6	KGRGNDRREKLQSFDSPERKRIKYSRETDSD	1025	-0.433481	0.0254722	0.972691	1.4576e-06	0.53921	0.000146108	-0.192141	0.0961445	0.24134	0.0871402
P78344	Eukaryotic translation initiation factor 4 gamma 2	EIF4G2	ESAIAEGGASRFSASSGGGGSRGAPQHYPKT	17	-0.255739	0.624846	-0.866861	0.00461895	-1.1226	0.00109111	-0.354004	0.266744	-0.0982645	0.906962
P78347	General transcription factor II-I	GTF2I	PEMFETAIKESTSSKSPPRKINSSPNVNTTA	823	-0.292883	0.119904	0.916285	2.81068e-06	0.623403	6.58587e-05	-0.241981	0.0485243	0.0509018	0.84803
P78347	General transcription factor II-I	GTF2I	VGGRVMVTDADRSILSPGGSCGPIKVKTEPT	210	-0.597835	0.434183	-0.825923	0.040699	-1.42376	0.00290969	-0.31902	0.513065	0.278815	0.75971
P78347	General transcription factor II-I	GTF2I	SKINTKALQSPKRPRSPGSNSKVPEIEVTVE	674	-0.382353	0.104956	1.28276	1.27713e-06	0.900408	2.42641e-05	-0.378844	0.020392	0.00350933	0.992478
P78356	Phosphatidylinositol 5-phosphate 4-kinase type-2 beta	PIP4K2B	SSNCTSTTAVAVAPLSASKTKTKKKHFVCQK	17	2.40617	0.00127485	-3.17195	9.13882e-07	-0.765787	0.0145142	2.33805	7.60245e-05	-0.0681198	0.951589
P78362	SRSF protein kinase 2;SRSF protein kinase 2 N-terminal;SRSF protein kinase 2 C-terminal	SRPK2	______MSVNSEKSSSSERPEPQQKAPLVPP	10	-0.22421	0.418184	0.777463	0.000166012	0.553254	0.00192779	-0.469932	0.0163308	-0.245723	0.274244
P78527	DNA-dependent protein kinase catalytic subunit	PRKDC	LSKIEEKLTPLPEDNSMNVDQDGDPSDRMEV	3205	1.40723	0.0637579	-1.2682	0.00419429	0.139036	0.703868	-0.83815	0.0771873	-2.24538	0.00150692
P78527	DNA-dependent protein kinase catalytic subunit	PRKDC	FRSTVLTPMFVETQASQGTLQTRTQEGSLSA	2612	0.737278	0.367186	0.750188	0.074691	1.48747	0.00337713	0.40773	0.431223	-0.329548	0.726208
P78563	Double-stranded RNA-specific editase 1	ADARB1	SSSTDVKENRNLDNVSPKDGSTPGPGEGSQL	26	0.175588	0.21634	-0.312297	0.000949165	-0.13671	0.0690319	0.351044	0.00242896	0.175457	0.117871
P82094	TATA element modulatory factor	TMF1	FSVQSLDSRSVSEINSDDELSGKGYALVPII	344	-0.357705	0.225875	0.795232	0.000241248	0.437528	0.0110526	0.0700836	0.716927	0.427788	0.0659793
P84101	Small EDRK-rich factor 2	SERF2	QRELARQKNMKKQSDSVKGKRRDDGLSAAAR	21	0.457004	0.550589	0.480087	0.204819	0.937092	0.0263233	-0.191988	0.70052	-0.648993	0.300435
P84243	Histone H3.3	H3F3A	GKAPRKQLATKAARKSAPSTGGVKKPHRYRP	29	0.859999	0.198356	-3.28445	2.88586e-06	-2.42445	3.87611e-05	0.890048	0.0442947	0.0300494	0.978074
P85037	Forkhead box protein K1	FOXK1	AAPALVAAAAASVRQSPGPALARLEGREFEF	101	-0.681119	0.0430517	0.389586	0.0260939	-0.291532	0.0832411	-0.975798	0.000734903	-0.294679	0.257576
P98175	RNA-binding protein 10	RBM10	HTSMDLPKLASDDRPSPPRGLVAAYSGESDS	723	-0.28927	0.0649711	1.1045	1.94685e-07	0.81523	2.80727e-06	-0.156024	0.107248	0.133246	0.285042
Q00059	Transcription factor A, mitochondrial	TFAM	YNVYVAERFQEAKGDSPQEKLKTVKENWKNL	177	1.33355	0.000697384	-2.97102	1.89073e-08	-1.63747	1.40767e-06	0.748423	0.00135311	-0.585128	0.0105523
Q00587	Cdc42 effector protein 1	CDC42EP1	PNGVTAGLGPVAEVKSSPVGGGPRGPAGPAL	302	-0.239689	0.15906	-0.228594	0.0161991	-0.468283	0.000254315	-0.212184	0.056591	0.0275052	0.923877
Q00839	Heterogeneous nuclear ribonucleoprotein U	HNRNPU	DEEAGGRPAMEPGNGSLDLGGDSAGRSGAGL	59	0.731603	0.172325	-1.28152	0.00052812	-0.549918	0.0540873	-0.350648	0.296447	-1.08225	0.0144537
Q00839	Heterogeneous nuclear ribonucleoprotein U	HNRNPU	____________MSSSPVNVKKLKVSELKEE	4	0.180619	0.333193	0.580972	8.34736e-05	0.761591	1.68904e-05	0.235375	0.054507	0.0547555	0.833068
Q01082	Spectrin beta chain, non-erythrocytic 1	SPTBN1	KGEQVSQNGLPAEQGSPRMAETVDTSEMVNG	2138	0.23371	0.452191	-0.871653	0.000167492	-0.637942	0.00163068	0.384203	0.0570015	0.150493	0.640355
Q01105	Protein SET	SET	_________MAPKRQSPLPPQKKKPRPPPAL	7	0.0398441	0.934767	0.0710432	0.7212	0.110887	0.586276	0.0105826	0.971744	-0.0292615	0.962023
Q01105	Protein SET;Protein SETSIP	SET;SETSIP	STEIKWKSGKDLTKRSSQTQNKASRKRQHEE	183	-0.579119	0.129163	0.586963	0.0074927	0.00784422	0.968131	-0.697022	0.011336	-0.117903	0.812552
Q01105	Protein SET;Protein SETSIP	SET;SETSIP	TEIKWKSGKDLTKRSSQTQNKASRKRQHEEP	184	-0.916167	0.0163839	1.02663	0.000113872	0.110461	0.522894	-0.660072	0.00956956	0.256095	0.378831
Q01130	Serine/arginine-rich splicing factor 2	SRSF2	EGMTSLKVDNLTYRTSPDTLRRVFEKYGRVG	26	0.402088	0.215832	-0.978581	0.000105977	-0.576493	0.0040708	0.00449295	0.984537	-0.397595	0.12139
Q01433	AMP deaminase 2	AMPD2	IEQLEERRQRLERQISQDVKLEPDILLRAKQ	168	0.21824	0.698014	1.38737	0.00030061	1.60561	0.000142532	-0.317909	0.34552	-0.536149	0.20997
Q01518	Adenylyl cyclase-associated protein 1	CAP1	EAVSHTSDMHRGYADSPSKAGAAPYVQAFDS	34	1.21856	0.145489	-3.36968	1.20142e-05	-2.15112	0.000380076	1.3073	0.0235164	0.088742	0.959949
Q01518	Adenylyl cyclase-associated protein 1	CAP1	VRSGPKPFSAPKPQTSPSPKRATKKEPAVLE	308	-0.0127002	0.978721	2.77489	1.01906e-07	2.76219	3.27162e-07	-0.0336221	0.884602	-0.0209219	0.968571
Q01650	Large neutral amino acids transporter small subunit 1	SLC7A5	EEAREKMLAAKSADGSAPAGEGEGVTLQRNI	35	0.552185	0.150848	-0.316735	0.104706	0.23545	0.224096	-0.1632	0.507724	-0.715385	0.0219547
Q02040	A-kinase anchor protein 17A	AKAP17A	CKEVQSSCRVVPEDGSPEKRCPGGVLSCIPD	537	-0.220828	0.329135	1.14412	2.35373e-06	0.923295	1.68904e-05	-0.169659	0.23146	0.0511688	0.87967
Q02241	Kinesin-like protein KIF23	KIF23	GQSVQFTDIETLKQESPNGSRKRRSSTVAPA	902	0.469543	0.057232	0.324063	0.0150086	0.793605	6.784e-05	0.317416	0.0437181	-0.152126	0.471412
Q02790	Peptidyl-prolyl cis-trans isomerase FKBP4;Peptidyl-prolyl cis-trans isomerase FKBP4, N-terminally processed	FKBP4	TEMKEEQKSNTAGSQSQVETEA_________	453	-1.57696	0.000449797	0.137974	0.330411	-1.43899	4.50536e-06	-0.516889	0.0134732	1.06007	0.000553001
Q02880	DNA topoisomerase 2-beta	TOP2B	PKGKGRGAKKRKASGSENEGDYNPGRKTSKT	1552	-0.283539	0.319035	1.1011	1.67914e-05	0.81756	0.000193459	-0.352315	0.0578401	-0.068776	0.871305
Q03111	Protein ENL	MLLT1	KEPKMALKETKLESTSPKGGPPPPPPPPPRA	267	0.127439	0.419527	0.556198	3.17919e-05	0.683637	1.11542e-05	0.334942	0.00545241	0.207503	0.0926334
Q03164	Histone-lysine N-methyltransferase 2A;MLL cleavage product N320;MLL cleavage product C180	KMT2A	LPLELPSDLSVLTTRSPTVPSQNPSRLAVIS	2938	0.406234	0.624846	-0.497541	0.215323	-0.0913067	0.822354	0.36455	0.480908	-0.0416841	0.974384
Q03164	Histone-lysine N-methyltransferase 2A;MLL cleavage product N320;MLL cleavage product C180	KMT2A	PPTPPILSTDRSREDSPELNPPPGIEDNRQC	1858	-0.226888	0.514601	0.282032	0.106656	0.0551435	0.747098	-0.158203	0.470314	0.0686849	0.898926
Q03252	Lamin-B2	LMNB2	SPSSRVTVSRATSSSSGSLSATGRLGRSKRK	422	0.647475	0.379835	-2.51656	3.79052e-05	-1.86909	0.000401562	0.474538	0.297938	-0.172937	0.873123
Q03252	Lamin-B2	LMNB2	RVTVSRATSSSSGSLSATGRLGRSKRKRLEV	426	0.0697897	0.880347	-1.80473	6.42097e-06	-1.73494	1.32465e-05	-0.233765	0.367411	-0.303555	0.381804
Q03468	DNA excision repair protein ERCC-6	ERCC6	CTTSLRQINKIIEQLSPQAATSRDINRKLDS	158	1.17006	0.198458	-1.56818	0.00428387	-0.398118	0.383915	1.26285	0.0382267	0.0927903	0.959949
Q03701	CCAAT/enhancer-binding protein zeta	CEBPZ	KAKPGLRSQLDDHPESDDEENFIDANDDEDM	629	-0.111098	0.591425	1.32781	4.13603e-07	1.21671	1.50642e-06	-0.122652	0.341451	-0.0115541	0.97311
Q04637	Eukaryotic translation initiation factor 4 gamma 1	EIF4G1	RGRDAVKREAALPPVSPLKAALSEEELEKKS	1231	0.117337	0.585201	-0.365727	0.00432941	-0.24839	0.0326904	0.1137	0.399808	-0.00363694	0.991687
Q04637	Eukaryotic translation initiation factor 4 gamma 1	EIF4G1	RGDRLDRARTPATKRSFSKEVEERSRERPSQ	1185	-0.0170749	0.982591	0.503831	0.0647572	0.486756	0.0766163	-0.0651818	0.850458	-0.0481069	0.959949
Q04637	Eukaryotic translation initiation factor 4 gamma 1	EIF4G1	TESTDNRRVVQRSSLSRERGEKAGDRGDRLE	1147	-0.632811	0.599149	2.23054	0.00251624	1.59773	0.0170887	-0.420007	0.583144	0.212805	0.91472
Q04656	Copper-transporting ATPase 1	ATP7A	LYRVSITSEVESTSNSPSSSSLQKIPLNVVS	357	0.569993	0.0467104	-1.4707	1.51024e-06	-0.900706	7.65835e-05	0.400718	0.0308808	-0.169275	0.495791
Q04726	Transducin-like enhancer protein 3	TLE3	NGLDKARSLKKDAPTSPASVASSSSTPSSKT	286	0.538207	0.309367	3.05143	9.48097e-07	3.58964	8.13328e-07	-0.241623	0.476647	-0.779831	0.0625602
Q04726	Transducin-like enhancer protein 3	TLE3	ELDHRERESSANNSVSPSESLRASEKHRGSA	203	0.0412278	0.920785	0.00690129	0.969151	0.0481291	0.786133	-0.139477	0.543851	-0.180705	0.613259
Q05086	Ubiquitin-protein ligase E3A	UBE3A	MEEDSEASSSRIGDSSQGDNNLQKLGPDDVS	218	-1.02439	0.0100457	1.93537	1.24279e-06	0.910983	0.00036489	-0.285788	0.194768	0.7386	0.0116651
Q05209	Tyrosine-protein phosphatase non-receptor type 12	PTPN12	NTLLNRGHAIKIKSASPCIADKISKPQELSS	468	0.455718	0.463966	-2.51555	1.20142e-05	-2.05983	7.1321e-05	0.474834	0.22344	0.0191156	0.984541
Q05519	Serine/arginine-rich splicing factor 11	SRSF11	SKVNGDDHHEEDMDMSD______________	483	-0.351884	0.103173	1.27842	7.05392e-07	0.926532	1.11542e-05	-0.325925	0.0259587	0.025958	0.95301
Q05D32	CTD small phosphatase-like protein 2	CTDSPL2	_______MRLRTRKASQQSNQIQTQRTARAK	9	-0.159024	0.561675	-1.27507	4.00915e-06	-1.43409	3.096e-06	-0.282266	0.10427	-0.123241	0.671074
Q05D32	CTD small phosphatase-like protein 2	CTDSPL2	HVKQNGKLEDNPSSGSPPRTTLLGTIFSPVF	134	1.71633	0.0296232	-1.92206	0.000302854	-0.205736	0.580274	1.97545	0.00162977	0.259126	0.781259
Q05D32	CTD small phosphatase-like protein 2	CTDSPL2	NFFSPANKNGTSGSDSPGQAVEAEEIVKQLD	165	0.00588752	0.98375	-1.42482	2.4871e-07	-1.41893	6.71513e-07	0.521662	0.00196656	0.515775	0.00421536
Q06210	Glutamine--fructose-6-phosphate aminotransferase [isomerizing] 1	GFPT1	RGKDKKGSCNLSRVDSTTCLFPVEEKAVEYY	261	-0.484578	0.392768	0.86138	0.00810389	0.376802	0.186576	-0.0041413	0.991685	0.480437	0.295978
Q06546	GA-binding protein alpha chain	GABPA	AAKVQRAPRISGEDRSSPGNRTGNNGQIQLW	308	0.642992	0.474646	-1.63998	0.00295413	-0.996991	0.0396339	0.777427	0.166682	0.134435	0.93176
Q06546	GA-binding protein alpha chain	GABPA	AKVQRAPRISGEDRSSPGNRTGNNGQIQLWQ	309	0.784999	0.0938308	-1.97776	7.42585e-06	-1.19276	0.00036799	0.943351	0.00667509	0.158352	0.781504
Q06587	E3 ubiquitin-protein ligase RING1	RING1	GPAPKRPRGGGAGGSSVGTGGGGTGGVGGGA	212	-0.361194	0.535523	-0.866708	0.00906183	-1.2279	0.00133361	-0.0943887	0.806541	0.266805	0.659986
Q06587	E3 ubiquitin-protein ligase RING1	RING1	GTGGGGTGGVGGGAGSEDSGDRGGTLGGGTL	229	-0.182185	0.387924	1.10723	1.60698e-06	0.925043	9.79957e-06	-0.329449	0.0230275	-0.147264	0.40749
Q07065	Cytoskeleton-associated protein 4	CKAP4	PSAKQRGSKGGHGAASPSEKGAHPSGGADDV	17	-0.146562	0.681763	-0.625689	0.00287154	-0.772251	0.000890627	-0.220026	0.300387	-0.073463	0.889954
Q07157	Tight junction protein ZO-1	TJP1	WRFRGLRSSKRNLRKSREDLSAQPVQTKFPA	617	-0.721814	0.0025041	-0.187172	0.0558907	-0.908986	5.2056e-06	0.18697	0.114758	0.908784	0.000100087
Q07955	Serine/arginine-rich splicing factor 1	SRSF1	EGETAYIRVKVDGPRSPSYGRSRSRSRSRSR	199	-0.0737694	0.783675	0.750856	9.25068e-05	0.677086	0.000246458	-0.103151	0.513064	-0.0293816	0.954382
Q08117	Amino-terminal enhancer of split	AES	NGHDGDTHQEDDGEKSD______________	196	0.135946	0.805207	1.23349	0.000427768	1.36944	0.000261389	-0.422654	0.178942	-0.558601	0.156286
Q08170	Serine/arginine-rich splicing factor 4	SRSF4	EHAKSESSQREGRGESENAGTNQETRSRSRS	431	-0.326125	0.0873532	1.94983	2.22654e-08	1.6237	1.9177e-07	-0.246786	0.0446511	0.079339	0.700903
Q08211	ATP-dependent RNA helicase A	DHX9	VPVALNIGKLAQFEPSQRQNQVGVVPWSPPQ	321	-2.10353	0.0302179	4.6503	2.20865e-06	2.54677	0.00023305	-1.42262	0.0241738	0.68091	0.377049
Q08379	Golgin subfamily A member 2	GOLGA2	LAAAKKKLREYQQRNSPGVPTGAKKKKKIKN	37	0.474498	0.394286	-2.82286	2.08785e-06	-2.34837	1.25082e-05	0.597513	0.0904821	0.123014	0.881855
Q08499	cAMP-specific 3',5'-cyclic phosphodiesterase 4D	PDE4D	ISNTFLDKQHEVEIPSPTQKEKEKKKRPMSQ	348	0.471952	0.0314273	-1.81404	6.2619e-08	-1.34209	9.83305e-07	0.488949	0.00308999	0.0169977	0.960941
Q08499	cAMP-specific 3',5'-cyclic phosphodiesterase 4D	PDE4D	FAALTNLQDRAPSKRSPMCNQPSINKATITE	255	0.568334	0.651136	-1.92962	0.00662246	-1.36129	0.0380291	0.383031	0.628496	-0.185303	0.929942
Q08752	Peptidyl-prolyl cis-trans isomerase D	PPID	______________MSHPSPQAKPSNPSNPR	2	1.42134	0.07513	-3.48735	5.45156e-06	-2.06601	0.000316059	0.939675	0.0619712	-0.481665	0.493301
Q08945	FACT complex subunit SSRP1	SSRP1	GLKEGMNPSYDEYADSDEDQHDAYLERMKEE	444	-0.435455	0.0559364	1.37718	5.25439e-07	0.941724	1.19146e-05	-0.473886	0.00495087	-0.038431	0.914989
Q08945	FACT complex subunit SSRP1	SSRP1	SRGSSSKSSSRQLSESFKSKEFVSSDESSSG	659	1.78843	0.38164	-1.73359	0.0942183	0.0548365	0.958455	-0.745755	0.567167	-2.53418	0.112377
Q08AD1	Calmodulin-regulated spectrin-associated protein 2	CAMSAP2	QEMSILNSNIKLNQSSPDNVTDTKGALSPIT	599	-0.37873	0.689126	-0.822112	0.0773646	-1.20084	0.0179245	0.0730206	0.903493	0.45175	0.622118
Q08AD1	Calmodulin-regulated spectrin-associated protein 2	CAMSAP2	SGKRTPRSESVEGFLSPSRCGSRNGEKDWEN	1319	0.34144	0.19843	-0.97675	2.39133e-05	-0.635309	0.000640794	0.657564	0.00239593	0.316124	0.132233
Q08J23	tRNA (cytosine(34)-C(5))-methyltransferase	NSUN2	PDNDVTEGQRAGEPNSPDAEEANSPDVTAGC	743	-0.242742	0.222583	1.00686	2.40789e-06	0.764113	2.63513e-05	-0.135758	0.27863	0.106985	0.579082
Q08J23	tRNA (cytosine(34)-C(5))-methyltransferase	NSUN2	QRAGEPNSPDAEEANSPDVTAGCDPAGVHPP	751	-0.286108	0.255493	0.86604	4.03808e-05	0.579932	0.000837238	-0.181137	0.25051	0.10497	0.714089
Q08J23	tRNA (cytosine(34)-C(5))-methyltransferase	NSUN2	EKKKEGVILTNESAASTGQPDNDVTEGQRAG	724	-0.00436159	0.988528	-0.688303	0.000185531	-0.692664	0.000226712	-0.0594787	0.713494	-0.0551171	0.881946
Q08J23	tRNA (cytosine(34)-C(5))-methyltransferase	NSUN2	MKVINTGIKVWCRNNSGEEFDCAFRLAQEGI	593	-1.08421	0.000378011	1.89062	2.22654e-08	0.806409	8.86175e-06	-1.2061	5.77561e-06	-0.121894	0.435812
Q09161	Nuclear cap-binding protein subunit 1	NCBP1	_________MSRRRHSDENDGGQPHKRRKTS	7	-0.257299	0.201217	-0.114748	0.248076	-0.372047	0.00320628	-0.31829	0.0230275	-0.0609908	0.821139
Q09472	Histone acetyltransferase p300	EP300	____MAENVVEPGPPSAKRPKLSSPALSASA	12	0.362544	0.622855	-1.70983	0.00054556	-1.34729	0.00293382	0.247015	0.597294	-0.115529	0.923919
Q09472	Histone acetyltransferase p300	EP300	GLDDESNNQQAAATQSPGDSRRLSIQRCIQS	1726	0.316375	0.501898	-0.994977	0.00110497	-0.678602	0.0115984	0.0759027	0.806607	-0.240472	0.60406
Q09472	Histone acetyltransferase p300	EP300	PQVQAKNQQNQQPGQSPQGMRPMSNMSASPM	499	-0.00221217	0.995917	-1.93405	1.96201e-06	-1.93626	3.4734e-06	0.198959	0.401328	0.201171	0.574227
Q09666	Neuroblast differentiation-associated protein AHNAK	AHNAK	ASLGSLEGEAEAEASSPKGKFSLFKSKKPRH	5763	0.249048	0.244236	0.0317093	0.76353	0.280758	0.0201271	0.278597	0.0497016	0.0295487	0.941014
Q09666	Neuroblast differentiation-associated protein AHNAK	AHNAK	AQRDDGVFVQEVTQNSPAARTGVVKEGDQIV	41	-0.543719	0.159758	-0.766932	0.0018141	-1.31065	6.19042e-05	-0.255882	0.292071	0.287837	0.377962
Q09666	Neuroblast differentiation-associated protein AHNAK	AHNAK	VDVTGREGAKDIDISSPEFKIKIPRHELTEI	177	0.553634	0.0026837	-0.819423	1.10388e-06	-0.265789	0.00344704	0.672979	4.51527e-05	0.119345	0.31988
Q09666	Neuroblast differentiation-associated protein AHNAK	AHNAK	KFNFSKPKGKGGVTGSPEASISGSKGDLKSS	5731	0.336955	0.123007	0.187677	0.0895022	0.524632	0.00056532	0.186497	0.167461	-0.150458	0.416902
Q09666	Neuroblast differentiation-associated protein AHNAK	AHNAK	GGLGSKSKGHYEVTGSDDETGKLQGSGVSLA	5841	-0.213812	0.542539	0.858971	0.000420174	0.645159	0.00309612	-0.187735	0.393766	0.0260775	0.962023
Q09666	Neuroblast differentiation-associated protein AHNAK	AHNAK	QKPKISMQDVDLSLGSPKLKGDIKVSAPGVQ	511	0.85226	0.135581	-2.77704	2.91446e-06	-1.92478	6.05311e-05	0.969687	0.0160972	0.117427	0.895009
Q09666	Neuroblast differentiation-associated protein AHNAK	AHNAK	ETPNLEGTLTGPRLGSPSGKTGTCRISMSEV	559	0.75567	0.000960338	-0.245096	0.00919238	0.510574	0.00010916	0.890585	1.65134e-05	0.134916	0.314462
Q09666	Neuroblast differentiation-associated protein AHNAK	AHNAK	VDVETQSGKTVIRLPSGSGAASPTGSAVDIR	210	0.279322	0.690364	3.24464	3.14114e-06	3.52396	3.09991e-06	-0.278099	0.518893	-0.557421	0.310677
Q09666	Neuroblast differentiation-associated protein AHNAK	AHNAK	SGKTVIRLPSGSGAASPTGSAVDIRAGAISA	216	-0.250969	0.241377	-0.763448	3.09321e-05	-1.01442	6.56934e-06	0.0550004	0.697385	0.305969	0.0693792
Q09666	Neuroblast differentiation-associated protein AHNAK	AHNAK	LQGSGVSLASKKSRLSSSSSNDSGNKVGIQL	5863	-0.160436	0.704956	-0.817671	0.00154833	-0.978107	0.00057283	0.327111	0.196557	0.487548	0.123785
Q09666	Neuroblast differentiation-associated protein AHNAK	AHNAK	QGSGVSLASKKSRLSSSSSNDSGNKVGIQLP	5864	0.511936	0.394908	0.824226	0.0139174	1.33616	0.000960732	0.610558	0.107248	0.0986219	0.921217
Q0JRZ9	F-BAR domain only protein 2	FCHO2	PAISRHSPVQMNRNLSNEELTKSKPSAPPNE	403	-0.332321	0.0863961	0.893096	3.70162e-06	0.560775	0.000151176	-0.117858	0.318243	0.214463	0.148611
Q12778	Forkhead box protein O1	FOXO1	PEGGKSGKSPRRRAASMDNNSKFAKSRSRAA	256	-0.25218	0.362879	2.10761	1.4047e-07	1.85543	8.13328e-07	-0.318493	0.0730262	-0.0663129	0.871305
Q12778	Forkhead box protein O1	FOXO1	KKKASLQSGQEGAGDSPGSQFSKWPASPGSH	287	0.0737481	0.779799	-1.36893	9.58807e-07	-1.29518	2.60948e-06	0.463108	0.00908121	0.38936	0.0409755
Q12789	General transcription factor 3C polypeptide 1	GTF3C1	GSSSEDSPPEGQAPPSHSPRGTKRRASWASE	1854	0.0209867	0.951325	1.24803	6.70252e-06	1.26901	9.75933e-06	0.154803	0.393305	0.133816	0.657563
Q12789	General transcription factor 3C polypeptide 1	GTF3C1	SSEDSPPEGQAPPSHSPRGTKRRASWASENG	1856	-0.178494	0.498436	1.77506	2.96271e-07	1.59657	1.31685e-06	0.109674	0.513063	0.288168	0.16059
Q12789	General transcription factor 3C polypeptide 1	GTF3C1	EEDSQGKEGPSGSGDSQLSASSRSESGRMKK	751	-0.0292406	0.946208	0.0308643	0.8615	0.00162367	0.992991	-2.81427	1.88196e-06	-2.78503	6.26582e-06
Q12789	General transcription factor 3C polypeptide 1	GTF3C1	VRCPRVRKNSSTDQGSDEEGSLQKEQESAMD	1068	-0.383631	0.126684	1.04091	9.03249e-06	0.657278	0.000321529	0.0661314	0.684796	0.449763	0.0250424
Q12797	Aspartyl/asparaginyl beta-hydroxylase	ASPH	SSSGSGSGSTSAGSSSPGARRETKHGGHKNG	29	-0.145465	0.912756	-1.40249	0.0246675	-1.54795	0.0166809	-0.00423035	0.995086	0.141235	0.951589
Q12830	Nucleosome-remodeling factor subunit BPTF	BPTF	KAKEGCQSDSMRQEQSPNANNDQPEDLIQGC	1251	0.102297	0.615142	-0.756142	1.89104e-05	-0.653844	7.66622e-05	0.256468	0.0500802	0.154171	0.353821
Q12830	Nucleosome-remodeling factor subunit BPTF	BPTF	DVSIRSPETKCPKQNSIENDIEEKVSDLASR	1310	0.370811	0.317439	0.0707239	0.696594	0.441535	0.0303505	-0.666307	0.0133254	-1.03712	0.00251567
Q12830	Nucleosome-remodeling factor subunit BPTF	BPTF	VGDFKSEKSNGELSESPGAGKGASGSTRIIT	763	0.690938	0.0025041	-0.473423	0.000260755	0.217515	0.0273203	0.761209	7.60245e-05	0.0702714	0.736107
Q12830	Nucleosome-remodeling factor subunit BPTF	BPTF	SVTTGTKMVLTTKVGSPATVTFQQNKNFHQT	2098	0.780019	0.548075	-2.90438	0.000795953	-2.12436	0.00612745	0.963954	0.23191	0.183935	0.93704
Q12830	Nucleosome-remodeling factor subunit BPTF	BPTF	QPQSNVQGQSPVRVQSPSQTRIRPSTPSQLS	2471	0.180531	0.402081	0.775427	2.63163e-05	0.955958	9.17801e-06	0.32389	0.0270317	0.143359	0.443367
Q12834	Cell division cycle protein 20 homolog	CDC20	ARWQRKAKEAAGPAPSPMRAANRSHSAGRTP	41	0.202147	0.461216	-1.01105	2.33774e-05	-0.808902	0.000158652	1.32177	3.69041e-05	1.11963	0.000248537
Q12846	Syntaxin-4	STX4	KAIEPQKEEADENYNSVNTRMRKTQHGVLSQ	117	-0.139882	0.746983	0.552667	0.0137313	0.412784	0.0521643	-0.377016	0.134213	-0.237134	0.518226
Q12857	Nuclear factor 1 A-type	NFIA	TSSTKRLKSVEDEMDSPGEEPFYTGQGRSPG	287	-0.210101	0.324046	0.540313	0.000357393	0.330213	0.00856382	-0.0945519	0.487269	0.115549	0.569759
Q12857	Nuclear factor 1 A-type	NFIA	ESSSYYSMSPGAMRRSLPSTSSTSSTKRLKS	265	1.14548	0.00392162	-2.76669	7.13959e-08	-1.62121	4.12631e-06	0.766289	0.0029395	-0.379191	0.134975
Q12872	Splicing factor, suppressor of white-apricot homolog	SFSWAP	_MYGASGGRAKPERKSGAKEEAGPGGAGGGG	15	1.34725	0.0103797	-3.99057	7.13959e-08	-2.64332	1.96902e-06	1.18573	0.00205142	-0.161517	0.781382
Q12873	Chromodomain-helicase-DNA-binding protein 3	CHD3	YKKKKKELQGDGPPSSPTNDPTVKYETQPRF	713	-0.0740107	0.651136	0.528575	4.77611e-05	0.454564	0.000188686	-0.246909	0.023804	-0.172899	0.165193
Q12888	Tumor suppressor p53-binding protein 1	TP53BP1	DQELQQPQTQEKTSNSLTEDSKMANAKQLSS	862	1.84522	0.104161	-2.10017	0.00258139	-0.25495	0.648529	-1.15093	0.107164	-2.99614	0.00313248
Q12888	Tumor suppressor p53-binding protein 1	TP53BP1	DEDGENTQIEDTEPMSPVLNSKFVPAENDSI	552	-2.26502	0.00315267	3.15422	2.05943e-06	0.889209	0.0120899	-0.411738	0.285366	1.85328	0.00162929
Q12888	Tumor suppressor p53-binding protein 1	TP53BP1	GERKNGSTAVAESVASPQKTMSVLSCICEAR	1028	-0.504973	0.00757399	1.18557	1.83219e-07	0.680594	1.3455e-05	-0.359382	0.00431896	0.145591	0.268336
Q12888	Tumor suppressor p53-binding protein 1	TP53BP1	LKSGTAETEPVEQDSSQPSLPLVRADDPLRL	831	-0.280527	0.416727	2.75978	1.0696e-07	2.47926	5.73193e-07	-1.54794	5.18914e-05	-1.26741	0.000530474
Q12888	Tumor suppressor p53-binding protein 1	TP53BP1	PSPDAFRSTPFIVPSSPTEQEGRQDKPMDTS	380	-0.571356	0.00865103	1.43175	1.51882e-07	0.860392	8.56649e-06	-0.377025	0.00804944	0.194331	0.198718
Q12906	Interleukin enhancer-binding factor 3	ILF3	GGGGSDYNYESKFNYSGSGGRSGGNSYGSGG	810	0.00729003	0.990198	-2.23274	1.53862e-05	-2.22545	2.31718e-05	-0.0155303	0.970515	-0.0228203	0.979244
Q12906	Interleukin enhancer-binding factor 3	ILF3	GGSDYNYESKFNYSGSGGRSGGNSYGSGGAS	812	-0.150784	0.637646	-1.79449	8.89255e-07	-1.94528	1.16653e-06	-0.121312	0.545343	0.0294721	0.959949
Q12906	Interleukin enhancer-binding factor 3	ILF3	DWIDEQEKGSSEQAESDNMDVPPEDDSKEGA	62	-0.438705	0.0289344	1.65502	6.15282e-08	1.21632	9.83305e-07	-0.231732	0.0584572	0.206973	0.162916
Q12906	Interleukin enhancer-binding factor 3	ILF3	ITPMKRPMEEDGEEKSPSKKKKKIQKKEEKA	382	0.0903916	0.894512	1.33551	0.000875687	1.4259	0.000677789	-0.137128	0.72579	-0.227519	0.747693
Q12926	ELAV-like protein 2	ELAVL2	PSQKTNQAILSQLYQSPNRRYPGPLAQQAQR	221	0.871686	0.321916	-2.63958	0.000108768	-1.76789	0.00193962	0.976495	0.0846342	0.104809	0.954382
Q12986	Transcriptional repressor NF-X1	NFX1	DQEKCTVRRQDPQVVSPFSRGKQNHVLKNVE	326	0.0809599	0.896935	-0.565686	0.0535853	-0.484726	0.0947323	0.214318	0.554624	0.133358	0.871923
Q12996	Cleavage stimulation factor subunit 3	CSTF3	SNAVLTKAVKRPNEDSDEDEEKGAVVPPVHD	691	-0.190797	0.434589	1.03653	7.87101e-06	0.845737	5.05075e-05	-0.160494	0.291532	0.0303034	0.95033
Q13045	Protein flightless-1 homolog	FLII	KDPMARKMRLRRRKDSAQDDQAKQVLKGMSD	436	0.0117809	0.975434	0.492061	0.00283188	0.503842	0.00280672	-0.287776	0.0922586	-0.299557	0.153783
Q13045	Protein flightless-1 homolog	FLII	VLTVDYTRNAEAVLQSPGLSGKVKRDAEKKD	856	1.07793	0.000658511	-2.66513	1.01229e-08	-1.58721	5.48148e-07	0.294043	0.0414325	-0.783884	0.000576197
Q13098	COP9 signalosome complex subunit 1	GPS1	VLRNQIHVKSPPREGSQGELTPANSQSRMST	474	-0.103843	0.729916	0.770139	0.000200972	0.666296	0.000664225	-0.306213	0.0882915	-0.202369	0.396446
Q13098	COP9 signalosome complex subunit 1	GPS1	MMLRAAVLRNQIHVKSPPREGSQGELTPANS	468	0.107193	0.858486	0.363877	0.160355	0.471071	0.0820861	0.171874	0.611509	0.0646808	0.95033
Q13111	Chromatin assembly factor 1 subunit A	CHAF1A	GGGVGVDTGKATLTASPLGAS__________	951	-0.0661628	0.794015	0.357838	0.00745592	0.291675	0.0224731	-0.00518207	0.974911	0.0609808	0.856852
Q13111	Chromatin assembly factor 1 subunit A	CHAF1A	QPDSLVDHNKLNSEASPSREAINGQREDTGD	141	-0.240761	0.314971	0.745969	8.38059e-05	0.505208	0.00144887	-0.267985	0.0830695	-0.0272238	0.956736
Q13112	Chromatin assembly factor 1 subunit B	CHAF1B	PDTAKKTKSQTHRGSSPGPRPVEGTPASRTQ	410	-0.0977312	0.836523	2.23387	1.59506e-06	2.13614	3.94195e-06	-0.156739	0.564416	-0.0590074	0.938653
Q13112	Chromatin assembly factor 1 subunit B	CHAF1B	SPLPGPSEEKTLQPSSQNTKAHPSRRVTLNT	473	1.06463	0.224883	-4.20073	3.57271e-06	-3.1361	4.42058e-05	1.2105	0.0397379	0.145877	0.921217
Q13112	Chromatin assembly factor 1 subunit B	CHAF1B	RPVEGTPASRTQDPSSPGTTPPQARQAPAPT	429	-1.01222	0.505923	4.22023	0.000170031	3.20801	0.00130952	-1.34993	0.153108	-0.337706	0.87967
Q13118	Krueppel-like factor 10	KLF10	PSSETVICRSQPAPVSPQQKSVLVSPPAVSA	249	-0.898303	0.0203093	1.1325	6.73056e-05	0.234199	0.193137	-0.611197	0.0155191	0.287107	0.326478
Q13129	Zinc finger protein Rlf	RLF	KKLLLKGSQKGICPKSPSAIPEQNHSLNDQA	632	0.0513418	0.858945	0.478955	0.00220348	0.530296	0.00134696	0.440027	0.014021	0.388686	0.0493389
Q13131	5'-AMP-activated protein kinase catalytic subunit alpha-1	PRKAA1	RSGSVSNYRSCQRSDSDAEAQGKSSEVSLTS	508	-0.262265	0.555833	0.677623	0.00841498	0.415358	0.0751776	-0.420281	0.134536	-0.158017	0.774136
Q13177	Serine/threonine-protein kinase PAK 2;PAK-2p27;PAK-2p34	PAK2	______________MSDNGELEDKPPAPPVR	2	-0.642318	0.0795638	0.512155	0.0115244	-0.130163	0.465876	-0.237255	0.288715	0.405063	0.148876
Q13185	Chromobox protein homolog 3	CBX3	NSQKAGKEKDGTKRKSLSDSESDDSKSKKKR	93	0.121492	0.889182	-0.324498	0.382674	-0.203005	0.59234	0.184201	0.712932	0.0627087	0.960941
Q13185	Chromobox protein homolog 3	CBX3	QKAGKEKDGTKRKSLSDSESDDSKSKKKRDA	95	-0.223355	0.27017	0.899521	6.24701e-06	0.676166	7.09993e-05	-0.180744	0.158412	0.0426111	0.895009
Q13185	Chromobox protein homolog 3	CBX3	AGKEKDGTKRKSLSDSESDDSKSKKKRDAAD	97	-0.45988	0.21023	2.17584	7.64145e-07	1.71596	6.91351e-06	-0.197497	0.395785	0.262382	0.402347
Q13185	Chromobox protein homolog 3	CBX3	KEKDGTKRKSLSDSESDDSKSKKKRDAADKP	99	-0.473195	0.262678	2.63397	5.72619e-07	2.16078	3.94195e-06	-0.205667	0.447774	0.267528	0.48457
Q13188	Serine/threonine-protein kinase 3;Serine/threonine-protein kinase 3 36kDa subunit;Serine/threonine-protein kinase 3 20kDa subunit	STK3	EDEEEEDGTMKRNATSPQVQRPSFMDYFDKQ	385	0.647038	0.00832495	-1.5245	2.0737e-07	-0.877467	1.52203e-05	1.05087	3.05489e-05	0.40383	0.0195484
Q13200	26S proteasome non-ATPase regulatory subunit 2	PSMD2	MEEGGRDKAPVQPQQSPAAAPGGTDEKPSGK	16	0.5017	0.124295	-1.75633	1.38337e-06	-1.25463	2.31628e-05	0.280185	0.166534	-0.221514	0.428188
Q13200	26S proteasome non-ATPase regulatory subunit 2	PSMD2	IYKTHLENNRFGGSGSQVDSARMNLASSFVN	363	-0.166515	0.273411	0.546119	2.98394e-05	0.379604	0.000498931	-0.40432	0.00169621	-0.237805	0.049897
Q13206	Probable ATP-dependent RNA helicase DDX10	DDX10	_________MGKTANSPGSGARPDPVRSFNR	7	0.496353	0.360625	-0.0887063	0.736409	0.407647	0.140648	0.94136	0.0146538	0.445007	0.314462
Q13233	Mitogen-activated protein kinase kinase kinase 1	MAP3K1	KHRLQGFIPCRIPSASPQTQRKFSLQFHRNC	1018	0.0558437	0.927824	-0.587851	0.0343107	-0.532007	0.0536795	0.200325	0.551704	0.144481	0.842421
Q13247	Serine/arginine-rich splicing factor 6	SRSF6	DIKSKSRSRSQSRSNSPLPVPPSKARSVSPP	303	-0.137042	0.689126	0.591792	0.00306341	0.45475	0.0142667	-0.318804	0.121807	-0.181762	0.551716
Q13263	Transcription intermediary factor 1-beta	TRIM28	SAAAASAAAASAASGSPGPGEGSAGGEKRST	19	-0.292591	0.514772	-0.405132	0.077297	-0.697722	0.00784643	0.0752975	0.8	0.367888	0.312919
Q13263	Transcription intermediary factor 1-beta	TRIM28	LSLDGADSTGVVAKLSPANQRKCERVLLALF	697	0.771591	0.0887975	-2.40334	1.41424e-06	-1.63175	3.42241e-05	0.384828	0.166639	-0.386763	0.286373
Q13263	Transcription intermediary factor 1-beta	TRIM28	YSSAEPHVSGVKRSRSGEGEVSGLMRKVPRV	473	-0.384429	0.0188966	-0.665179	5.7249e-06	-1.04961	6.42598e-07	-0.568852	0.000156684	-0.184423	0.117022
Q13283	Ras GTPase-activating protein-binding protein 1	G3BP1	PVLEETAPEDAQKSSSPAPADIAQTVQEDLR	232	-0.454454	0.338712	1.19656	0.000370211	0.742108	0.00815599	-0.527742	0.0842424	-0.0732873	0.92983
Q13310	Polyadenylate-binding protein 4	PABPC4	KKEAAQKVGAVAAATS_______________	644	0.338216	0.737565	-1.59811	0.00441637	-1.25989	0.0169461	-0.235267	0.700168	-0.573483	0.49807
Q13322	Growth factor receptor-bound protein 10	GRB10	QPRASGPPRSIQPQVSPRQRVQRSQPVHILA	104	0.515187	0.182518	-1.19975	8.46998e-05	-0.684567	0.00409322	0.861748	0.00431896	0.346561	0.272186
Q13330	Metastasis-associated protein MTA1	MTA1	NVKAGVVNGTGAPGQSPGAGRACESCYTTQS	386	0.868769	0.028184	-2.84862	1.4047e-07	-1.97985	2.85926e-06	0.926643	0.00228394	0.0578734	0.928274
Q13330	Metastasis-associated protein MTA1	MTA1	TRLDGERPGPNRSNMSPHGLPARSSGSPKFA	449	0.272842	0.532718	-0.56956	0.0176891	-0.296718	0.177762	0.320152	0.235205	0.0473107	0.959949
Q13416	Origin recognition complex subunit 2	ORC2	FSLKNDPEITINVPQSSKGHSASDKVQPKNN	138	-0.290201	0.748007	-2.05801	0.000432838	-2.34821	0.000221375	0.210522	0.700168	0.500723	0.513706
Q13424	Alpha-1-syntrophin	SNTA1	GWDSPPASPLQRQPSSPGPTPRNFSEAKHMS	201	0.00436201	0.986687	0.456016	0.000805416	0.460378	0.000896726	0.151045	0.233164	0.146683	0.396446
Q13425	Beta-2-syntrophin	SNTB2	SPPAPPRGPAGEAGASPPVRRVRVVKQEAGG	110	-0.234025	0.258054	0.884388	8.23985e-06	0.650363	0.000108847	-0.274972	0.0455178	-0.040947	0.900237
Q13427	Peptidyl-prolyl cis-trans isomerase G	PPIG	NSSNNSREKKADRDQSPFSKIKQSSQDNELK	687	-0.175166	0.546605	1.26158	6.55417e-06	1.08641	2.91727e-05	-0.148282	0.419165	0.0268842	0.959949
Q13427	Peptidyl-prolyl cis-trans isomerase G	PPIG	KGDKSELNEIKENQRSPVRVKERKITDHRNV	397	-0.0898506	0.774847	1.04578	2.44644e-05	0.955928	6.63216e-05	-0.161313	0.370572	-0.0714628	0.865428
Q13427	Peptidyl-prolyl cis-trans isomerase G	PPIG	KADRDQSPFSKIKQSSQDNELKSSMLKNKED	696	-0.911191	0.100335	1.57864	0.000141289	0.667444	0.0268646	-0.414073	0.226305	0.497118	0.261861
Q13427	Peptidyl-prolyl cis-trans isomerase G	PPIG	RVKERKITDHRNVSESPNRKNEKEKKVKDHK	415	0.103161	0.586699	0.454943	0.000488698	0.558104	0.000153215	-0.0479515	0.698182	-0.151113	0.331657
Q13428	Treacle protein	TCOF1	GKTHQIRAALAPAKESPRKGAAPTPPGKTGP	906	-0.282501	0.160866	1.04153	1.96712e-06	0.759024	2.94175e-05	-0.406145	0.00746808	-0.123644	0.499012
Q13428	Treacle protein	TCOF1	GKTSQVGAASAPAKESPRKGAAPAPPGKTGP	381	-0.585573	0.0295766	1.24053	2.88287e-06	0.654961	0.000373249	-0.392893	0.0242012	0.19268	0.362041
Q13428	Treacle protein	TCOF1	KGATPAPPGKAGAVASQTKAGKPEEDSESSS	328	0.0461189	0.899775	-2.21738	2.94756e-07	-2.17126	8.3956e-07	-0.105052	0.620387	-0.151171	0.657987
Q13428	Treacle protein	TCOF1	TAHPRIAPKASMAGASSSKESSRISDGKKQE	1041	0.25	0.589972	-3.87845	8.11024e-08	-3.62845	3.34811e-07	0.57494	0.0553878	0.324939	0.406154
Q13428	Treacle protein	TCOF1	VKPAQVKASSVSTKESPARKAAPAPGKVGDV	233	-0.0540765	0.783675	0.817817	4.64538e-06	0.76374	1.21215e-05	-0.125189	0.259685	-0.0711124	0.732699
Q13428	Treacle protein	TCOF1	PANSQASKATPKLDSSPSVSSTLAAKDDPDG	1228	0.385721	0.0772401	-0.0734538	0.476212	0.312267	0.0111264	0.240283	0.0791216	-0.145438	0.430593
Q13428	Treacle protein	TCOF1	EKKKKAKKASTKDSESPSQKKKKKKKKTAEQ	1471	0.452385	0.342199	0.394372	0.104158	0.846756	0.00397037	0.3104	0.297485	-0.141984	0.827918
Q13428	Treacle protein	TCOF1	ASGDVKEKKGKGSLGSQGAKDEPEEELQKGM	1410	-1.15556	0.282333	2.14815	0.00179055	0.992591	0.0800916	-0.635087	0.352172	0.520472	0.64522
Q13428	Treacle protein	TCOF1	KKKKLGAGEGGEASVSPEKTSTTSKGKAKRD	1378	-0.257206	0.512608	0.967657	0.000390508	0.71045	0.00334126	-0.356626	0.144706	-0.0994198	0.863825
Q13435	Splicing factor 3B subunit 2	SF3B2	EKILQLKESRQEEMNSQQEEEEMETDARSSL	289	-0.314051	0.244266	-0.0591095	0.655896	-0.37316	0.0158059	-0.314274	0.0739656	-0.000223519	0.999997
Q13435	Splicing factor 3B subunit 2	SF3B2	EEEEMETDARSSLGQSASETEEDTVSVSKKE	307	0.148802	0.880347	1.31449	0.00850304	1.4633	0.00522933	-0.275642	0.625416	-0.424444	0.634574
Q13439	Golgin subfamily A member 4	GOLGA4	SLFRSSSKESLVRTSSRESLNRLDLDSSTAS	98	-1.31393	0.00524031	3.07624	1.23141e-07	1.76231	8.71529e-06	-0.305175	0.213025	1.00876	0.00381621
Q13451	Peptidyl-prolyl cis-trans isomerase FKBP5;Peptidyl-prolyl cis-trans isomerase FKBP5, N-terminally processed	FKBP5	___MTTDEGAKNNEESPTATVAEQGEDITSK	13	0.684919	0.0270519	-0.938621	5.97542e-05	-0.253702	0.0919703	0.278381	0.127921	-0.406538	0.072392
Q13459	Unconventional myosin-IXb	MYO9B	VGKVSEETEKTLPSGSPRPGQLERPTSLALD	1242	0.00737676	0.984762	-0.375952	0.0152821	-0.368576	0.0179923	0.146254	0.404789	0.138878	0.622118
Q13459	Unconventional myosin-IXb	MYO9B	KSKPCGSPRVQEKPDSPGGSTQIQRYLDAER	1290	-0.0649135	0.699541	0.603144	2.03108e-05	0.538231	6.54315e-05	0.168422	0.100655	0.233335	0.0637667
Q13501	Sequestosome-1	SQSTM1	IDVEHGGKRSRLTPVSPESSSTEEKSSSQPS	272	-0.186925	0.539124	-0.941331	7.85792e-05	-1.12826	2.97046e-05	-0.326009	0.0903401	-0.139084	0.659986
Q13523	Serine/threonine-protein kinase PRP4 homolog	PRPF4B	PRDDILSRRERSKDASPINRWSPTRRRSRSP	431	-0.0680924	0.797613	1.20302	2.57624e-06	1.13493	6.59018e-06	-0.268999	0.082966	-0.200907	0.310677
Q13523	Serine/threonine-protein kinase PRP4 homolog	PRPF4B	TDKEKKPIKSPSKDASSGKENRSPSRRPGRS	334	0.236608	0.730907	0.708724	0.0383302	0.945332	0.0110526	0.0491524	0.909278	-0.187456	0.833068
Q13523	Serine/threonine-protein kinase PRP4 homolog	PRPF4B	DANSEKSINEENGEVSEDQSQNKHSRHKKKK	32	-0.928639	0.436563	1.25574	0.0452181	0.327098	0.58154	0.153435	0.844314	1.08207	0.25991
Q13523	Serine/threonine-protein kinase PRP4 homolog	PRPF4B	VKAKHNLMTVEQNNGSSQKKLLAPDMFTESD	622	0.444627	0.413632	-1.72873	6.64278e-05	-1.2841	0.000662583	0.203891	0.560402	-0.240735	0.678062
Q13523	Serine/threonine-protein kinase PRP4 homolog	PRPF4B	SKERKKSKSPSKRSKSQDQARKSKSPTLRRR	232	-0.0607411	0.871491	0.420456	0.0210876	0.359715	0.0435624	-0.0449077	0.836616	0.0158333	0.976666
Q13523	Serine/threonine-protein kinase PRP4 homolog	PRPF4B	NDRRSKQSKSPSRTLSPGRRAKSRSLERKRR	387	0.122866	0.880347	0.952434	0.0172767	1.0753	0.0102868	0.117939	0.806541	-0.00492656	0.997818
Q13547	Histone deacetylase 1	HDAC1	GVQMQAIPEDAIPEESGDEDEDDPDKRISIC	393	-0.217774	0.232926	1.42188	1.35737e-07	1.20411	9.44511e-07	-0.291722	0.0224374	-0.0739482	0.72782
Q13586	Stromal interaction molecule 1	STIM1	VAEEDNGSIGEETDSSPGRKKFPLKIFKKPL	668	1.06037	0.00161623	-0.698456	0.000195811	0.361916	0.0128582	1.20949	3.75934e-05	0.149121	0.525437
Q13601	KRR1 small subunit processome component homolog	KRR1	_____________MASPSLERPEKGAGKSEF	3	0.826353	0.000697384	-1.12814	3.3201e-07	-0.301783	0.00376792	0.682905	0.000103924	-0.143447	0.29809
Q13610	Periodic tryptophan protein 1 homolog	PWP1	LIAEAKEKLQEEGGGSDEEETGSPSEDGMQS	50	-0.498146	0.0566091	1.83439	1.88262e-07	1.33625	2.96074e-06	-0.402679	0.0217293	0.0954673	0.747271
Q13610	Periodic tryptophan protein 1 homolog	PWP1	FGRRERLVLGSARNSSISGPFGSRSSDTPME	485	0.417607	0.280045	-0.955705	0.000437853	-0.538098	0.0150228	-0.461078	0.0668031	-0.878685	0.00812531
Q13620	Cullin-4B	CUL4B	DAKMAEESSSSSSSSSPTAATSQQQQLKNKS	146	0.802628	0.00792628	-0.915152	3.17244e-05	-0.112524	0.385684	0.887179	0.000318487	0.084551	0.801417
Q13625	Apoptosis-stimulating of p53 protein 2	TP53BP2	QSNAPPSFGTLRKNQSSEDILRDAQVANKNV	480	-0.528543	0.276282	1.16114	0.00054543	0.632592	0.0204733	-0.448174	0.145477	0.0803687	0.921442
Q13769	THO complex subunit 5 homolog	THOC5	VIRSDGAPAEGKRNRSDTEQEGKYYSEEAEV	28	0.0995312	0.651136	0.296145	0.0132366	0.395677	0.00298312	-0.372426	0.0141343	-0.471958	0.00872683
Q13829	BTB/POZ domain-containing adapter for CUL3-mediated RhoA degradation protein 2	TNFAIP1	SLLEATSRSRSQASPSEDEETFELRDRVRRI	280	-0.456139	0.385053	1.84924	3.05651e-05	1.3931	0.000300739	-0.138063	0.686843	0.318076	0.50056
Q13884	Beta-1-syntrophin	SNTB1	AGAGHPGAGGAQPPDSPAGVRTAFTDLPEQV	87	0.290705	0.490562	-0.720153	0.00422601	-0.429447	0.0536795	0.243465	0.355338	-0.0472405	0.956736
Q13905	Rap guanine nucleotide exchange factor 1	RAPGEF1	QQTDTPPALPEKKRRSAASQTADGSGCRVSY	463	-0.46516	0.580506	-2.39741	0.000148599	-2.86257	5.73668e-05	-0.448958	0.396461	0.0162024	0.991687
Q14008	Cytoskeleton-associated protein 5	CKAP5	LLSQIDAEFEKMQGQSPPAPTRGISKHSTSG	816	1.18261	0.0445943	-3.01474	1.52474e-06	-1.83212	8.22026e-05	0.800126	0.0349732	-0.382488	0.437197
Q14103	Heterogeneous nuclear ribonucleoprotein D0	HNRNPD	IDASKNEEDEGHSNSSPRHSEAATAQREEWK	83	0.30422	0.0740199	-0.346489	0.00128975	-0.0422686	0.607892	-0.0747162	0.479289	-0.378936	0.00766782
Q14134	Tripartite motif-containing protein 29	TRIM29	ASRSNGSSPEARDARSPSGPSGSLENGTKAD	21	0.514752	0.297926	-1.87784	1.94559e-05	-1.36309	0.00025653	0.0932994	0.774405	-0.421452	0.301078
Q14134	Tripartite motif-containing protein 29	TRIM29	YLTPKGGVRTSYQPSSPGRFTKETTQKNFNN	489	0.825332	0.0647205	-3.01057	2.59423e-07	-2.18523	4.12631e-06	0.634468	0.0306186	-0.190863	0.684811
Q14151	Scaffold attachment factor B2	SAFB2	ISVKTTSRSKERSSKSQDRKSESKEKRDILS	598	-0.281532	0.146328	1.22021	5.02242e-07	0.938679	5.21638e-06	-0.287272	0.0289164	-0.00573943	0.984934
Q14152	Eukaryotic translation initiation factor 3 subunit A	EIF3A	EERERRREEERRLGDSSLSRKDSRWGDRDSE	881	-0.182292	0.531789	0.444268	0.00786587	0.261976	0.0820861	-0.255152	0.158412	-0.0728596	0.865428
Q14157	Ubiquitin-associated protein 2-like	UBAP2L	KKKGVSGQKDGGQTESNEEGKENRDRDRDYS	116	-0.584795	0.00579013	1.1289	4.84815e-07	0.544104	0.000122974	-0.429456	0.00268208	0.155339	0.28527
Q14157	Ubiquitin-associated protein 2-like	UBAP2L	QRSTQTRRYPSSISSSPQKDLTQAKNGFSSV	609	0.0233269	0.910487	0.870441	3.18991e-06	0.893768	4.50536e-06	0.0123142	0.919669	-0.0110127	0.968571
Q14160	Protein scribble homolog	SCRIB	LKLDYRALAAVPSAGSVQRVPSGAAGGKMAE	1279	-0.426769	0.478576	-2.45339	1.11045e-05	-2.88015	5.72856e-06	0.156634	0.690389	0.583403	0.224153
Q14160	Protein scribble homolog	SCRIB	TAKAERRHQERLRVQSPEPPAPERALSPAEL	1475	0.263471	0.753963	-0.523857	0.174093	-0.260386	0.500568	0.549459	0.25353	0.285988	0.755802
Q14160	Protein scribble homolog	SCRIB	DEQPPWASPSPTSRQSPASPPPLGGGAPVRT	1445	0.97395	0.00171712	0.947454	1.26402e-05	1.9214	3.08599e-07	0.947247	0.000111821	-0.026703	0.956736
Q14160	Protein scribble homolog	SCRIB	PPWASPSPTSRQSPASPPPLGGGAPVRTAKA	1448	0.363278	0.241377	1.04155	4.80393e-05	1.40483	8.803e-06	0.63156	0.00723604	0.268282	0.293717
Q14160	Protein scribble homolog	SCRIB	EGRRSEACPCQPDSGSPLPAEEEKRLSAESG	504	0.0161374	0.963104	0.0289671	0.823492	0.0451044	0.730594	0.290627	0.086046	0.27449	0.191428
Q14186	Transcription factor Dp-1	TFDP1	IEANGELKVFIDQNLSPGKGVVSLVAVHPST	23	-0.0377497	0.920785	0.192557	0.227805	0.154807	0.339857	0.144826	0.481422	0.182575	0.546741
Q14241	Transcription elongation factor B polypeptide 3	TCEB3	KSHKALSKEENRRPPSGDNAREKPPSSGVKK	311	0.120865	0.794015	-0.58303	0.0137299	-0.462165	0.0414887	-0.00151313	0.995086	-0.122378	0.833068
Q14244	Ensconsin	MAP7	RENVLFLTSGTRRAVSPSNPKARQPARSRLW	315	0.245952	0.485069	-1.63667	4.06326e-06	-1.39071	1.99563e-05	0.246645	0.258594	0.000692943	0.999997
Q14258	E3 ubiquitin/ISG15 ligase TRIM25	TRIM25	PPADVWTPPARASAPSPNAQVACDHCLKEAA	100	0.0551386	0.935338	-1.02686	0.00323667	-0.97172	0.00501112	0.096592	0.8	0.0414534	0.962023
Q14498	RNA-binding protein 39	RBM39	SRRRSRSKSPFRKDKSPVREPIDNLTPEERD	136	-0.264334	0.145489	1.09439	6.60497e-07	0.830056	7.82568e-06	-0.487322	0.00150574	-0.222988	0.117058
Q14542	Equilibrative nucleoside transporter 2	SLC29A2	TKAELLQSDENGIPSSPQKVALTLDLDLEKE	252	1.07457	0.000730114	-0.885655	1.32619e-05	0.188913	0.100701	0.792633	0.000241668	-0.281935	0.107186
Q14669	E3 ubiquitin-protein ligase TRIP12	TRIP12	GSPSLQHSRDDSLDLSPQGRLSDVLKRKRLP	991	0.373455	0.428336	0.570296	0.0257195	0.943751	0.0019115	1.46311	0.000606094	1.08965	0.0070116
Q14669	E3 ubiquitin-protein ligase TRIP12	TRIP12	AKLASLRKSTKKRSESPPAELPSLRRSTRQK	312	-0.506657	0.120476	1.45177	5.30306e-06	0.945117	0.000164217	-0.353065	0.0872797	0.153591	0.648073
Q14669	E3 ubiquitin-protein ligase TRIP12	TRIP12	KKRHLDQEQQLKSAQSPSTSKAHTRKSGATG	127	1.07058	0.000355734	-1.39045	1.01762e-07	-0.319861	0.00300941	1.12471	6.05284e-06	0.0541278	0.809542
Q14669	E3 ubiquitin-protein ligase TRIP12	TRIP12	QVPKKDNSRGVKRSASPDYNRTNSPSSAKKP	77	-0.392677	0.356067	2.29216	1.44015e-06	1.89948	9.10683e-06	-0.306967	0.245083	0.0857094	0.898057
Q14669	E3 ubiquitin-protein ligase TRIP12	TRIP12	RGVKRSASPDYNRTNSPSSAKKPKALQHTES	85	0.443304	0.262593	2.39103	7.01032e-07	2.83434	6.07296e-07	0.13283	0.609843	-0.310474	0.348802
Q14671	Pumilio homolog 1	PUM1	YFFQRQHGEQLGGGGSGGGGYNNSKHRWPTG	98	0.393142	0.689126	-1.94077	0.00135335	-1.54762	0.00595202	0.295518	0.628525	-0.0976245	0.959949
Q14676	Mediator of DNA damage checkpoint protein 1	MDC1	CLSPPRAIPGDQHPESPVHTEPMGIQGRGRQ	793	-0.035397	0.905452	0.80792	8.5516e-05	0.772523	0.000155821	-0.40817	0.023804	-0.372773	0.068057
Q14678	KN motif and ankyrin repeat domain-containing protein 1	KANK1	AASQINVCGVRKRSYSAGNASQLEQLSRARR	325	-0.226297	0.408014	0.842308	8.37629e-05	0.616012	0.00088863	0.0231178	0.899036	0.249415	0.255345
Q14683	Structural maintenance of chromosomes protein 1A	SMC1A	LSKGTMDDISQEEGSSQGEDSVSGSQRISSI	957	-1.10919	0.0961123	2.56756	1.50561e-05	1.45838	0.00100795	-1.02347	0.023804	0.0857149	0.945672
Q14684	Ribosomal RNA processing protein 1 homolog B	RRP1B	SQSGPSGSHPQGPRGSPTGGAQLLKRKRKLG	513	0.75942	0.0271006	-0.591043	0.00284522	0.168377	0.296105	1.15157	0.000237519	0.392152	0.121138
Q14684	Ribosomal RNA processing protein 1 homolog B	RRP1B	NMTAEFKKTDKSILVSPTGPSRVAFDPEQKP	706	0.853046	0.0273386	-2.16263	7.16772e-07	-1.30959	3.87611e-05	1.33709	0.000202519	0.484043	0.0870303
Q14684	Ribosomal RNA processing protein 1 homolog B	RRP1B	PEQKPLHGVLKTPTSSPASSPLVAKKPLTTT	732	0.261811	0.409345	4.98974	3.53871e-09	5.25155	3.63828e-09	0.115656	0.568567	-0.146155	0.659986
Q14687	Genetic suppressor element 1	GSE1	RLALSTRYSPDEMNNSPNFEEKKKFLTIFNL	857	0.895705	0.0100457	-1.2083	1.44645e-05	-0.312597	0.0551638	0.75667	0.00242	-0.139034	0.669848
Q14692	Ribosome biogenesis protein BMS1 homolog	BMS1	ISGSKAAGEGSKAGLSPANCQSDRVNLEKSL	552	1.17216	0.00299451	-1.63105	1.91993e-06	-0.458891	0.0116616	1.51517	3.69041e-05	0.343013	0.167338
Q14694	Ubiquitin carboxyl-terminal hydrolase 10	USP10	NHSVNEEEQEEQGEGSEDEWEQVGPRNKTSV	576	-0.244408	0.25936	1.22412	1.10388e-06	0.979716	8.96398e-06	-0.000526488	0.9967	0.243882	0.155068
Q14694	Ubiquitin carboxyl-terminal hydrolase 10	USP10	FMGDMPPSVTPRTCNSPQNSTDSVSDIVPDS	211	0.589724	0.297539	2.428	7.85566e-06	3.01773	2.96074e-06	-0.136878	0.713494	-0.726602	0.104886
Q14739	Lamin-B receptor	LBR	PLTSFRQRKGGSTSSSPSRRRGSRSRSRSRS	71	-0.652481	0.0549797	-0.0227661	0.888322	-0.675247	0.0016176	-0.372121	0.0776686	0.28036	0.29527
Q14739	Lamin-B receptor	LBR	SRSPGRPPKSARRSASASHQADIKEARREVE	99	0.178456	0.532562	0.509924	0.00320745	0.68838	0.000559872	-0.0579953	0.751381	-0.236452	0.30919
Q14814	Myocyte-specific enhancer factor 2D	MEF2D	TPSLVTSSLTDPRLLSPQQPALQRNSVSPGL	180	0.380361	0.22243	-1.86511	7.46748e-07	-1.48475	6.35891e-06	0.546264	0.0146772	0.165903	0.585865
Q14839	Chromodomain-helicase-DNA-binding protein 4	CHD4	ELAEVEENKKMSQPGSPSPKTPTPSTPGDTQ	1535	-0.534003	0.259916	2.57219	1.4576e-06	2.03819	1.2266e-05	-0.491359	0.10623	0.0426436	0.960337
Q14847	LIM and SH3 domain protein 1	LASP1	MGPSGGEGMEPERRDSQDGSSYRRPLEQQQP	146	0.25275	0.45978	-1.40381	1.05247e-05	-1.15106	6.2122e-05	-0.140001	0.523173	-0.392752	0.142612
Q14847	LIM and SH3 domain protein 1	LASP1	DTPENLRLKQQSELQSQVRYKEEFEKNKGKG	82	0.434195	0.328909	-4.11602	4.33375e-08	-3.68182	2.75955e-07	0.527957	0.0668039	0.0937612	0.894906
Q14966	Zinc finger protein 638	ZNF638	DVSSSKPSIKAVIVSSPKAKATVSKTENQKS	1401	-0.393167	0.0462941	1.1161	7.79774e-07	0.722935	2.59341e-05	-0.221102	0.0698905	0.172065	0.261403
Q14978	Nucleolar and coiled-body phosphoprotein 1	NOLC1	GTSALTAQNGKAAKNSEEEEEEKKKAAVVVS	563	-0.33362	0.217596	1.07657	1.41258e-05	0.742951	0.000265382	-0.181073	0.288715	0.152547	0.549855
Q14978	Nucleolar and coiled-body phosphoprotein 1	NOLC1	PNTFPKRKKGEKRASSPFRRVREEEIEVDSR	623	-0.197186	0.57631	2.02452	9.17267e-07	1.82733	3.35665e-06	-0.311132	0.158412	-0.113946	0.804009
Q14978	Nucleolar and coiled-body phosphoprotein 1	NOLC1	DDSSEEEEEKLKGKGSPRPQAPKANGTSALT	538	0.158359	0.540711	0.526831	0.00143754	0.68519	0.000304704	0.181156	0.256962	0.0227965	0.960726
Q14978	Nucleolar and coiled-body phosphoprotein 1	NOLC1	VREEEIEVDSRVADNSFDAKRGAAGDWGERA	643	2.04956	0.0302524	-1.99694	0.000824989	0.0526215	0.908197	-1.53048	0.015904	-3.58004	0.00028104
Q14980	Nuclear mitotic apparatus protein 1	NUMA1	PRTQPDGTSVPGEPASPISQRLPPKVESLES	1757	0.0228166	0.928454	0.974165	5.26149e-06	0.996982	7.57109e-06	0.023314	0.872614	0.000497381	0.999997
Q14C86	GTPase-activating protein and VPS9 domain-containing protein 1	GAPVD1	DDLGPDRFSTLTDDPSPRLSAQAQVAEDILD	1019	0.862825	0.605935	-3.24982	0.00184967	-2.38699	0.0119752	0.951631	0.358514	0.0888064	0.973615
Q15003	Condensin complex subunit 2	NCAPH	_MGPPGPALPATMNNSSSETRGHPHSASSPS	15	2.49092	0.0320816	-3.76952	4.03162e-05	-1.2786	0.0332522	0.247346	0.728945	-2.24358	0.0139227
Q15003	Condensin complex subunit 2	NCAPH	HWRFRPRRKQDAPSQSENKKKSTKKDFEIDF	459	0.0783476	0.943523	-1.90837	0.00139118	-1.83003	0.00209336	0.247464	0.683498	0.169116	0.911773
Q15003	Condensin complex subunit 2	NCAPH	VFDLQFSTDSPRLLASPSSRSIDISATIPKF	87	0.861254	0.38164	-3.40709	3.44228e-05	-2.54583	0.000354986	1.04789	0.0927061	0.186635	0.907138
Q15007	Pre-mRNA-splicing regulator WTAP	WTAP	GFHREGNTTEDDFPSSPGNGNKSSNSSEERT	306	-0.221065	0.570504	1.19086	8.96352e-05	0.969792	0.000468667	-0.352528	0.147969	-0.131464	0.788054
Q15014	Mortality factor 4-like protein 2	MORF4L2	PGRWGGRSAENPPSGSVRKTRKNKQKTPGNG	71	0.968198	0.00429736	-2.0189	1.88262e-07	-1.0507	2.73306e-05	0.2057	0.233164	-0.762497	0.00258826
Q15019	Septin-2	2024-09-02	IEEHNIKIYHLPDAESDEDEDFKEQTRLLKA	218	-0.403354	0.162366	0.988583	4.04272e-05	0.585229	0.00182556	-0.225471	0.213288	0.177882	0.496266
Q15021	Condensin complex subunit 1	NCAPD2	KPSTGSRYQPLASTASDNDFVTPEPRRTTRR	1333	0.520215	0.277345	0.828085	0.00430021	1.3483	0.000226346	0.237465	0.438863	-0.28275	0.526016
Q15022	Polycomb protein SUZ12	SUZ12	CRPKRTKASMSEFLESEDGEVEQQRTYSSGH	546	-0.471357	0.0180083	1.53375	7.88648e-08	1.06239	1.59003e-06	-0.286874	0.022507	0.184483	0.199969
Q15025	TNFAIP3-interacting protein 1	TNIP1	SQVMDPPTARPTEPESPKNDREGPQ______	627	0.785336	0.109817	-1.34584	0.000189094	-0.560508	0.0340951	0.721663	0.0289325	-0.0636727	0.945672
Q15036	Sorting nexin-17	SNX17	KMLRRRVGGTLRRSDSQQAVKSPPLLESPDA	409	-0.0816804	0.920785	1.36182	0.00200044	1.28014	0.00334653	-0.272042	0.54868	-0.190362	0.849239
Q15036	Sorting nexin-17	SNX17	WRVTSSVPLPSGSTSSPGRGRGEVRLELAFE	336	0.848532	0.0269707	-0.859125	0.000505117	-0.0105933	0.954366	0.82787	0.00335907	-0.0206616	0.971617
Q15059	Bromodomain-containing protein 3	BRD3	TTTPTTSAITASRSESPPPLSDPKQAKVVAR	263	-0.198273	0.360625	1.37586	4.67839e-07	1.17758	2.49031e-06	-0.022887	0.874559	0.175386	0.323066
Q15061	WD repeat-containing protein 43	WDR43	LITQVTASEKTKGATSPGQKAKLVYEEESSE	590	0.450106	0.478576	-0.651947	0.0504904	-0.20184	0.524284	0.323399	0.422334	-0.126708	0.898926
Q15061	WD repeat-containing protein 43	WDR43	CTCLAWAPARLQAKESPQRKKRKSEAVGMSN	77	-0.119361	0.584945	1.03712	3.42722e-06	0.917761	1.29593e-05	-0.196866	0.148098	-0.0775046	0.770478
Q15061	WD repeat-containing protein 43	WDR43	KPAPPQTEQVESKRKSGGNEVSIEERLGAMD	431	0.506339	0.566167	-2.51159	0.000151019	-2.00525	0.000854838	0.518233	0.349053	0.0118938	0.993571
Q15121	Astrocytic phosphoprotein PEA-15	PEA15	RIPSAKKYKDIIRQPSEEEIIKLAPPPKKA_	116	0.403108	0.687368	0.959524	0.0543525	1.36263	0.0126002	-0.390354	0.523237	-0.793461	0.31025
Q15149	Plectin	PLEC	ELQLVTYKAQLEPVASPAKKPKVQSGSESVI	1435	0.331184	0.241409	-0.730379	0.000322828	-0.399194	0.0140254	0.410971	0.0323222	0.0797871	0.841441
Q15149	Plectin	PLEC	FRAKIERARSDEGQLSPATRGAYRDCLGRLD	720	0.39502	0.447344	-1.05674	0.00147223	-0.661715	0.0215076	-0.148854	0.661406	-0.543874	0.184496
Q15149	Plectin	PLEC	DMLSGNAGGFRSRSSSVGSSSSYPISPAVSR	4386	-0.0236431	0.984762	3.23668	3.38997e-05	3.21304	5.13367e-05	-0.469238	0.424976	-0.445594	0.642825
Q15149	Plectin	PLEC	RSRSSSVGSSSSYPISPAVSRTQLASWSDPT	4396	0.527148	0.529352	-2.28758	0.000192422	-1.76043	0.00133994	0.823183	0.117041	0.296036	0.770478
Q15154	Pericentriolar material 1 protein	PCM1	GVESDKRVTNDISPESSPGVGRRRTKTPHTF	68	-0.124265	0.894694	2.16509	0.000290574	2.04082	0.000529685	-0.918762	0.0848842	-0.794497	0.232782
Q15172	Serine/threonine-protein phosphatase 2A 56 kDa regulatory subunit alpha isoform	PPP2R5A	KSVRKAQRQKRSQGSSQFRSQGSQAELHPLP	42	0.289243	0.447995	0.974148	0.000320894	1.26339	6.83899e-05	-0.00880005	0.974307	-0.298043	0.343357
Q15276	Rab GTPase-binding effector protein 1	RABEP1	KSDNDMFKDGLRRAQSTDSLGTSGSLQSKAL	407	-0.435359	0.156443	0.694136	0.000757751	0.258777	0.103145	-0.477767	0.0239145	-0.0424082	0.939541
Q15287	RNA-binding protein with serine-rich domain 1	RNPS1	____________MDLSGVKKKSLLGVKENNK	4	0.182012	0.760712	-1.39268	0.000366039	-1.21067	0.00111406	0.0977787	0.789998	-0.0842331	0.929942
Q15291	Retinoblastoma-binding protein 5	RBBP5	SLMDEGASSEKKRQSSADGSQPPKKKPKTTN	441	-0.0744756	0.670383	0.38979	0.00062628	0.315315	0.00283682	-0.347566	0.00626823	-0.27309	0.0408676
Q15365	Poly(rC)-binding protein 1	PCBP1	MSGAQIKIANPVEGSSGRQVTITGSAASISL	323	0.366134	0.203219	-2.35085	1.0024e-07	-1.98471	6.97848e-07	0.144616	0.431013	-0.221518	0.35756
Q15366	Poly(rC)-binding protein 2	PCBP2	PPKGVTIPYRPKPSSSPVIFAGGQDRYSTGS	189	0.396951	0.370213	-1.05045	0.000534922	-0.653503	0.0106667	0.276149	0.317339	-0.120802	0.847473
Q15397	Pumilio domain-containing protein KIAA0020	KIAA0020	KKGVKQFKNKQQGDKSPKNKFQPANKFNKKR	77	0.543164	0.0353159	-1.46478	7.20369e-07	-0.921618	2.95676e-05	0.634349	0.0019238	0.0911856	0.754063
Q15398	Disks large-associated protein 5	DLGAP5	VSQSRNEMGIPQQTTSPENAGPQNTKSEHVK	662	2.02583	0.000199477	-2.67588	4.34339e-08	-0.650048	0.000966559	2.25639	1.88196e-06	0.230556	0.337098
Q15398	Disks large-associated protein 5	DLGAP5	DVLMSSPEKNTASQNSILEEGETKISQSELF	777	0.407237	0.715857	-1.00771	0.066097	-0.600476	0.25834	-0.483876	0.471668	-0.891114	0.302891
Q15424	Scaffold attachment factor B1	SAFB	APKESSTSEGADQKMSSPEDDSDTKRLSKEE	383	-0.295276	0.781606	0.774283	0.113351	0.479008	0.321852	-0.211433	0.735353	0.0838421	0.960941
Q15424	Scaffold attachment factor B1	SAFB	PKESSTSEGADQKMSSPEDDSDTKRLSKEEK	384	0.936143	0.00115209	-2.30118	1.89073e-08	-1.36504	9.54737e-07	0.379316	0.0126831	-0.556827	0.00315757
Q15424	Scaffold attachment factor B1	SAFB	SQDRKSASREKRSVVSFDKVKEPRKSRDSES	604	0.278782	0.150242	-0.216498	0.0360858	0.0622846	0.519471	0.123544	0.305641	-0.155238	0.331657
Q15424	Scaffold attachment factor B1	SAFB	DKSKGVPVISVKTSGSKERASKSQDRKSASR	582	-0.341985	0.0766812	1.31612	2.49472e-07	0.974133	3.44661e-06	-0.499836	0.00162977	-0.15785	0.306745
Q15428	Splicing factor 3A subunit 2	SF3A2	___MDFQHRPGGKTGSGGVASSSESNRDRRE	13	0.302724	0.754073	-2.15121	0.000498655	-1.84848	0.00158491	0.105132	0.859462	-0.197592	0.882012
Q15428	Splicing factor 3A subunit 2	SF3A2	QHRPGGKTGSGGVASSSESNRDRRERLRQLA	19	0.685675	0.0961562	-3.16035	1.3335e-07	-2.47468	1.32798e-06	0.555287	0.0398828	-0.130388	0.804459
Q15555	Microtubule-associated protein RP/EB family member 2	MAPRE2	KPGSTPSRPSSAKRASSSGSASKSDKDLETQ	228	0.386016	0.467142	-2.54438	3.37203e-06	-2.15837	1.68904e-05	0.496195	0.138022	0.110179	0.895009
Q15555	Microtubule-associated protein RP/EB family member 2	MAPRE2	TPSRPSSAKRASSSGSASKSDKDLETQVIQL	232	0.512957	0.468312	-2.89668	1.0933e-05	-2.38372	6.28285e-05	1.04409	0.0293924	0.531135	0.37167
Q15629	Translocating chain-associated membrane protein 1	TRAM1	TENGVNGTLTSNVADSPRNKKEKSS______	365	0.402501	0.170205	-0.856591	0.000130643	-0.45409	0.0085569	0.470838	0.0216439	0.0683362	0.876144
Q15642	Cdc42-interacting protein 4	TRIP10	DVEFEDFSQPMNRAPSDSSLGTPSDGRPELR	296	0.128821	0.783675	1.91257	5.69027e-06	2.04139	6.08668e-06	-0.0256387	0.929284	-0.154459	0.769749
Q15650	Activating signal cointegrator 1	TRIP4	VKTPFDLAKAQENSNSVKKKTKFVNLYTREG	142	0.721862	0.52527	-3.00097	0.000244911	-2.27911	0.00180411	0.918597	0.193947	0.196735	0.914989
Q15651	High mobility group nucleosome-binding domain-containing protein 3	HMGN3	__________MPKRKSPENTEGKDGSKVTKQ	6	0.115512	0.728193	-0.0955133	0.524919	0.0199986	0.899435	-0.0365322	0.859345	-0.152044	0.634574
Q15742	NGFI-A-binding protein 2	NAB2	__________MHRAPSPTAEQPPGGGDSARR	6	-0.779671	0.339559	1.3809	0.00476324	0.601227	0.150823	-1.0528	0.0500647	-0.273131	0.793831
Q15751	Probable E3 ubiquitin-protein ligase HERC1	HERC1	MDNYMLSRNVDNAEGSDTDY___________	4857	-0.189848	0.280045	0.593842	4.63369e-05	0.403994	0.000852599	0.0520751	0.654765	0.241923	0.08016
Q15758	Neutral amino acid transporter B(0)	SLC1A5	LLKHYRGPAGDATVASEKESVM_________	535	0.147659	0.554721	-0.768085	8.74963e-05	-0.620426	0.0004832	-0.194175	0.213506	-0.341834	0.0790729
Q15773	Myeloid leukemia factor 2	MLF2	RAEGPPRLAIQGPEDSPSRQSRRYDW_____	238	-0.018106	0.964047	0.600904	0.0017853	0.582798	0.00248916	0.0749701	0.704966	0.0930761	0.816836
Q15942	Zyxin	ZYX	FSPVTPKFTPVASKFSPGAPGGSGSQPNQKL	281	1.87255	0.000870122	-3.36692	8.13109e-08	-1.49437	3.00881e-05	1.89149	3.9102e-05	0.0189328	0.976816
Q15942	Zyxin	ZYX	NQKLGHPEALSAGTGSPQPPSFTYAQQREKP	308	1.79341	0.0109536	-4.13074	3.64814e-07	-2.33733	3.00881e-05	1.48609	0.00293945	-0.307325	0.634572
Q15942	Zyxin	ZYX	QHPVPPPAQNQNQVRSPGAPGPLTLKEVEEL	344	0.362168	0.658567	-1.91782	0.000480226	-1.55565	0.00219167	0.287851	0.572581	-0.0743171	0.959949
Q16204	Coiled-coil domain-containing protein 6	CCDC6	RILQEKLDQPVSAPPSPRDISMEIDSPENMM	244	0.0189425	0.985293	1.04133	0.0160886	1.06027	0.0158383	-0.0447806	0.931609	-0.0637232	0.960941
Q16204	Coiled-coil domain-containing protein 6	CCDC6	GTSHGITRPSPRRSNSPDKFKRPTPPPSPNT	419	-0.657992	0.189237	2.90256	8.89928e-07	2.24457	9.15736e-06	-0.157778	0.629761	0.500214	0.212859
Q16512	Serine/threonine-protein kinase N1	PKN1	DISVEKLNLGTDSDSSPQKSSRDPPSSPSSL	562	0.32527	0.408014	0.14119	0.457206	0.46646	0.0294881	0.359267	0.144706	0.0339966	0.960941
Q16513	Serine/threonine-protein kinase N2	PKN2	FDLEPEPPPAPPRASSLGEIDESSELRVLDI	583	0.544342	0.027356	-0.0202392	0.859865	0.524103	0.00088863	0.0792847	0.597294	-0.465057	0.0145029
Q16539	Mitogen-activated protein kinase 14	MAPK14	______________MSQERPTFYRQELNKTI	2	-0.176437	0.819709	-0.340746	0.318001	-0.517183	0.147464	-0.38815	0.378127	-0.211713	0.819933
Q16594	Transcription initiation factor TFIID subunit 9	TAF9	SLTGQRFTVQMPTSQSPAVKASIPATSAVQN	196	-0.321435	0.82993	-1.47182	0.0397702	-1.79326	0.0178677	0.0106562	0.991685	0.332092	0.86605
Q16643	Drebrin	DBN1	GAIGQRLSNGLARLSSPVLHRLRLREDENAE	142	0.200723	0.392768	0.296035	0.0207213	0.496758	0.00130559	-0.0758707	0.617038	-0.276594	0.131771
Q16666	Gamma-interferon-inducible protein 16	IFI16	GPALSRKRKKEVDATSPAPSTSSTVKTEGAE	106	0.976518	0.00298184	-2.00204	1.41247e-07	-1.02552	2.22429e-05	0.832723	0.000538781	-0.143795	0.560513
Q16666	Gamma-interferon-inducible protein 16	IFI16	GPKGSKVSEEQTQPPSPAGAGMSTAMGRSPS	153	-0.222216	0.496304	2.35546	1.88262e-07	2.13324	9.07826e-07	-0.526486	0.0201664	-0.30427	0.241176
Q16832	Discoidin domain-containing receptor 2	DDR2	SLPSDSSMFNNNRSSSPSEQGSNSTYDRIFP	461	-1.07546	0.187504	0.283132	0.475113	-0.792325	0.06598	-1.56827	0.00936453	-0.49281	0.508796
Q1ED39	Lysine-rich nucleolar protein 1	KNOP1	QKLKFLRLMGGFKNLSPSFSRPASTIARPNM	387	1.17132	0.00226083	-2.66881	5.42869e-08	-1.49749	4.18266e-06	1.42876	3.75934e-05	0.257442	0.292629
Q1KMD3	Heterogeneous nuclear ribonucleoprotein U-like protein 2	HNRNPUL2	VPGDKAAEEQGDDQDSEKSKPAGSDGERRGV	185	-0.294018	0.346611	1.08907	3.4638e-05	0.795053	0.000413452	-0.195582	0.317339	0.0984357	0.809542
Q1KMD3	Heterogeneous nuclear ribonucleoprotein U-like protein 2	HNRNPUL2	EQGDDQDSEKSKPAGSDGERRGVKRQRDEKD	193	-0.286862	0.0995475	1.04608	6.34563e-07	0.759219	9.88384e-06	-0.063429	0.566215	0.223433	0.0973197
Q1KMD3	Heterogeneous nuclear ribonucleoprotein U-like protein 2	HNRNPUL2	EQGLGKREEDEPEERSGDETPGSEVPGDKAA	161	-0.246562	0.433623	1.44502	4.3851e-06	1.19846	2.56324e-05	0.0338669	0.872382	0.280429	0.270683
Q29RF7	Sister chromatid cohesion protein PDS5 homolog A	PDS5A	KPINKGRKRAAVGQESPGGLEAGNAKAPKLQ	1305	0.334127	0.44791	-0.877655	0.0016738	-0.543528	0.0248621	0.371504	0.176648	0.0373769	0.960941
Q29RF7	Sister chromatid cohesion protein PDS5 homolog A	PDS5A	KNKEINSDQATQGNISSDRGKKRTVTAAGAE	1232	0.549722	0.466942	-2.77817	2.34857e-05	-2.22845	0.000156849	0.258093	0.598149	-0.291629	0.744385
Q29RF7	Sister chromatid cohesion protein PDS5 homolog A	PDS5A	NRSREQSSEAAETGVSENEENPVRIISVTPV	1195	-0.545244	0.0639107	1.17745	1.03782e-05	0.632207	0.00103047	-0.319049	0.0819804	0.226195	0.337323
Q2KHR3	Glutamine and serine-rich protein 1	QSER1	QSSGPFKKQSATNLESEEDSEAPVDSTLNNN	987	-0.201361	0.368447	1.03196	4.31188e-06	0.830599	3.10779e-05	-0.157149	0.257547	0.0442115	0.899227
Q2KHT3	Protein CLEC16A	CLEC16A	TQHLPFRFYDQGRRGSSDPTVQRSVFASVDK	863	-0.223985	0.560577	0.763288	0.00174226	0.539303	0.0137574	-0.123916	0.620895	0.100069	0.858825
Q2M2I8	AP2-associated protein kinase 1	AAK1	ASLNKSKSATTTPSGSPRTSQQNVYNPSEGS	678	0.87878	0.149096	0.905139	0.00937706	1.78392	0.000160757	0.00632008	0.988634	-0.87246	0.0659793
Q2TAM9	Tumor suppressor candidate gene 1 protein	TUSC1	TNRRARDSGREDEPGSPRALRARLEKLEAMY	153	0.0704603	0.871491	0.625096	0.0058458	0.695556	0.00355618	-0.235159	0.329156	-0.305619	0.337064
Q2TB10	Zinc finger protein 800	ZNF800	YLEHHKKTHKANASNSPEGNKTKGRSTRSKA	647	0.193551	0.392768	0.778505	3.56969e-05	0.972056	1.11542e-05	0.370056	0.0190104	0.176505	0.340794
Q2TB10	Zinc finger protein 800	ZNF800	DEAKHSDSKHDGTSNSPSKKYEVADVGIEVK	595	0.36938	0.373948	0.759167	0.00285374	1.12855	0.000261389	0.0681854	0.80483	-0.301194	0.391431
Q2VPK5	Cytoplasmic tRNA 2-thiolation protein 2	CTU2	RAWGLQEIRDCLIEDSDDEAGQS________	508	-0.554327	0.226231	1.01427	0.000924463	0.459943	0.0598873	-0.422431	0.146035	0.131896	0.836648
Q32MZ4	Leucine-rich repeat flightless-interacting protein 1	LRRFIP1	PKSEDADRCTLPEHESPSQDISDACEAESTE	733	0.408566	0.402081	-1.72812	2.95954e-05	-1.31955	0.000268	0.673871	0.0375147	0.265305	0.561944
Q32MZ4	Leucine-rich repeat flightless-interacting protein 1	LRRFIP1	GVAKDNAKIDGATQSSPAEPKSEDADRCTLP	714	0.458372	0.544111	-2.10767	0.000167448	-1.64929	0.00107017	0.354201	0.458302	-0.104171	0.939541
Q32MZ4	Leucine-rich repeat flightless-interacting protein 1	LRRFIP1	PDEEKSDQQGEALDSSQKKTKNKKKKNKKKK	565	0.635432	0.209573	-1.34544	0.000255989	-0.710011	0.0141056	0.902491	0.0135175	0.267059	0.588967
Q32NC0	UPF0711 protein C18orf21	C18orf21	LKTPERRTANPNHDMSGSKGKSPASVFRTPT	152	0.231969	0.746389	-2.04079	8.43275e-05	-1.80882	0.000254463	0.319379	0.446292	0.0874101	0.945365
Q32P51	Heterogeneous nuclear ribonucleoprotein A1-like 2	HNRNPA1L2	SNFGPMKGGNFGGRSSGPYGGGGQYFAKPQN	286	0.933483	0.0185287	-2.97433	9.30124e-08	-2.04085	1.99664e-06	0.226313	0.317339	-0.70717	0.0167613
Q3KQU3	MAP7 domain-containing protein 1	MAP7D1	ASPRARLSASTASELSPKSKARPSSPSTSWH	460	0.0284794	0.948089	0.202777	0.259098	0.231256	0.210722	0.288408	0.208589	0.259928	0.402347
Q3KQU3	MAP7 domain-containing protein 1	MAP7D1	PFAEAEAFLKKAVVQSPQVTEVL________	834	0.436438	0.783675	-2.84193	0.00194435	-2.40549	0.00589748	0.674591	0.467139	0.238154	0.921442
Q3KQU3	MAP7 domain-containing protein 1	MAP7D1	PSGQVGPRPAPPQEESPSSEAKSRGPTPPAM	86	1.39837	0.0548181	-1.0815	0.00783272	0.316861	0.366547	1.37793	0.00846095	-0.0204392	0.984981
Q3KQU3	MAP7 domain-containing protein 1	MAP7D1	MKNATSSKQLPLEPESPSGQVGPRPAPPQEE	70	1.2455	0.108733	-0.991645	0.0192947	0.253859	0.508058	1.35653	0.0138614	0.111027	0.934352
Q3MII6	TBC1 domain family member 25	TBC1D25	ASQGPGGGGRLLRQASLDGLQQLRDNMGSRR	506	0.205091	0.38164	0.669316	0.00014374	0.874407	2.94175e-05	-0.142884	0.326867	-0.347975	0.0584493
Q4G0J3	La-related protein 7	LARP7	SSLPEVRTGKRKRSSSEDAESLAPRSKVKKI	300	0.0733635	0.686405	1.17461	2.96271e-07	1.24797	5.64831e-07	-0.39184	0.00376884	-0.465204	0.00292131
Q4G0J3	La-related protein 7	LARP7	TSISKMKRSRPTSEGSDIESTEPQKQCSKKK	261	-0.401755	0.0204396	1.57243	2.96403e-08	1.17067	5.25691e-07	-0.245938	0.0248934	0.155817	0.221222
Q4KMP7	TBC1 domain family member 10B	TBC1D10B	PGLKSRGSRAAGGAPSPPPPVRRASAGPAPG	678	-0.222751	0.22126	0.271754	0.00963026	0.0490032	0.590725	-0.303074	0.0189007	-0.0803233	0.68607
Q4LE39	AT-rich interactive domain-containing protein 4B	ARID4B	GFSEVAEKRIKLLNNSDERLQNSRAKDRKDV	912	1.14275	0.352419	-2.55533	0.00129394	-1.41258	0.0340432	1.28383	0.100655	0.141082	0.956329
Q4V328	GRIP1-associated protein 1	GRIPAP1	KSRSGLEELVLSEMNSPSRTQTGDSSSISSF	655	1.24512	0.067417	-3.21195	3.13058e-06	-1.96683	0.000152926	1.63279	0.00242896	0.38767	0.528589
Q4VC44	FLYWCH-type zinc finger-containing protein 1	FLYWCH1	ALRQREKRPNTAQRGSPGGPEFLKTPLGGSF	503	0.2259	0.510296	-1.00296	0.000118022	-0.777061	0.000833056	0.0765596	0.727427	-0.14934	0.684811
Q53EL6	Programmed cell death protein 4	PDCD4	NAKAKRRLRKNSSRDSGRGDSVSDSGSDALR	71	-1.92344	0.00123629	0.533543	0.0251606	-1.3899	9.5936e-05	-0.508141	0.0718479	1.4153	0.00100806
Q53EL6	Programmed cell death protein 4	PDCD4	QLRDLCPSRGRKRFVSEGDGGRLKPESY___	457	-0.693944	0.05982	1.26251	3.09279e-05	0.568567	0.00719348	-0.501564	0.0360385	0.19238	0.570343
Q53EL6	Programmed cell death protein 4	PDCD4	DSGSDALRSGLTVPTSPKGRLLDRRSRSGKG	94	-0.603591	0.0835527	1.81483	1.54025e-06	1.21124	4.33893e-05	-0.258596	0.225024	0.344995	0.202701
Q53GS9	U4/U6.U5 tri-snRNP-associated protein 2	USP39	VPFVRVKREREVDEDSEPEREVRAKNGRVDS	82	-0.414955	0.241409	0.907135	0.000342739	0.49218	0.0151103	-0.384843	0.0917234	0.0301126	0.960941
Q53HL2	Borealin	CDCA8	TPAAGERIYNISGNGSPLADSKEIFLTVPVG	219	1.33807	0.00115209	-1.88643	5.11989e-07	-0.548359	0.00335751	1.19059	0.000120836	-0.14748	0.634572
Q53HL2	Borealin	CDCA8	TARVKRCPPSKKRTQSIQGKGKGKRSSRANT	154	0.468087	0.752849	-2.41081	0.00366698	-1.94272	0.0130973	0.0424847	0.965284	-0.425602	0.812552
Q53LP3	Ankyrin repeat domain-containing protein SOWAHC	SOWAHC	GSSPQLKRSVCPGGSSPGSSSGGGRGRGGGD	226	0.537095	0.158404	-0.0121656	0.949415	0.524929	0.0151564	0.298724	0.211071	-0.238371	0.487
Q562F6	Shugoshin-like 2	SGOL2	TQNILELKKYVTDRKSAEQNESKINKLRNKV	895	1.0709	0.43975	-4.11769	0.000111949	-3.04679	0.00106458	1.71198	0.0572169	0.641085	0.659986
Q56P03	E2F-associated phosphoprotein	EAPP	KTMEDKLSSLGTGSSSGNGKVATAPTRYYDD	89	0.714706	0.456593	-2.58503	0.000224129	-1.87033	0.0022612	0.731323	0.222557	0.0166176	0.991687
Q58WW2	DDB1- and CUL4-associated factor 6	DCAF6	PRARPESERERDGEQSPNVSLMQRMSDMLSR	336	-0.29753	0.151052	0.126483	0.216018	-0.171046	0.109573	-0.207151	0.114318	0.0903784	0.687369
Q5BKZ1	DBIRD complex subunit ZNF326	ZNF326	GSYGGQRSMDSYLNQSYGMDNHSGGGGGSRF	56	1.02314	0.0469689	0.881972	0.00342424	1.90511	2.45082e-05	-0.634392	0.0503921	-1.65753	0.000850935
Q5D1E8	Ribonuclease ZC3H12A	ZC3H12A	SEQCSLDGKKLGAQASPGSRQEGLTQTYAPS	386	1.03566	0.00548095	-2.75256	5.83969e-08	-1.7169	2.32156e-06	1.13831	0.00021023	0.102645	0.797459
Q5EBL4	RILP-like protein 1	RILPL1	ENRIPQPPPIAHPRTSPQPESGIKRLFSFFS	346	0.291343	0.213214	-1.32765	1.05223e-06	-1.03631	1.00427e-05	0.0837027	0.581496	-0.20764	0.278659
Q5F1R6	DnaJ homolog subfamily C member 21	DNAJC21	HARAPSSSSLNSATSSQSKKEKRKNR_____	521	0.711519	0.450678	-2.56743	0.000206996	-1.85591	0.00212021	0.543221	0.35843	-0.168298	0.91472
Q5H9R7	Serine/threonine-protein phosphatase 6 regulatory subunit 3	PPP6R3	ETAEAKCAAPRPPSSSPEQRTGQPSAPGDTS	853	0.146778	0.797613	-1.11757	0.00107844	-0.970789	0.00300011	0.341134	0.295437	0.194356	0.753771
Q5HYI7	Metaxin-3	MTX3	KLTPAEEENNSFQRLSP______________	311	-0.738428	0.0496279	0.863284	0.000533649	0.124857	0.490571	-0.175723	0.446258	0.562704	0.049631
Q5HYJ3	Protein FAM76B	FAM76B	LSKGKKFDKSGSILTSP______________	338	1.3438	0.000934852	-2.58664	5.42869e-08	-1.24285	1.19146e-05	1.48675	2.38398e-05	0.142955	0.633212
Q5JRA6	Melanoma inhibitory activity protein 3	MIA3	ASQSTSQDCSQALKQSP______________	1906	0.548586	0.438691	-1.11138	0.00694867	-0.562793	0.120714	0.688129	0.122669	0.139543	0.899227
Q5JSH3	WD repeat-containing protein 44	WDR44	SLDSKGKELSDQATASPIVARTDLSNIPGLL	96	0.305742	0.545446	-1.49177	0.000112275	-1.18603	0.000675047	0.257668	0.418936	-0.048074	0.959949
Q5JSH3	WD repeat-containing protein 44	WDR44	IMRRTKEYVSNDAAQSDDEEKLQSQPTDTDG	403	0.133814	0.580047	0.703021	0.000128573	0.836835	5.07762e-05	0.0190378	0.90585	-0.114777	0.646463
Q5JSH3	WD repeat-containing protein 44	WDR44	TFKETENTAYKVGNESPVQELKQDVSKKIIE	50	0.3643	0.0784345	-0.440741	0.000951762	-0.0764414	0.447632	0.40591	0.00743343	0.0416103	0.895009
Q5JSZ5	Protein PRRC2B	PRRC2B	VAQSNSSEEEAREAGSPAQEFKYQKSLPPRF	613	0.0937258	0.589422	0.290491	0.00472276	0.384217	0.00097917	0.332307	0.00916212	0.238581	0.0753526
Q5JSZ5	Protein PRRC2B	PRRC2B	SSDFSERRERREGPGSEPDSQVDGGLSGASL	1395	-0.465046	0.0270148	1.29289	3.7613e-07	0.827848	1.32465e-05	-0.307471	0.0235694	0.157575	0.331657
Q5JSZ5	Protein PRRC2B	PRRC2B	FADSKQNVPSGGPVPSPQTYRPSSASPSGKP	2153	-0.785343	0.460414	-0.418739	0.418014	-1.20408	0.0363674	-0.183465	0.796235	0.601878	0.545221
Q5JTD0	Tight junction-associated protein 1	TJAP1	RSPKRMGVHHLHRKDSLTQAQEQGNLLN___	545	-0.359571	0.111886	0.85697	1.7827e-05	0.497399	0.00102222	-0.379224	0.0169082	-0.0196533	0.960941
Q5JTH9	RRP12-like protein	RRP12	PAQGKGDSIEEILADSEDEEDNEEEERSRGK	1080	-0.235523	0.329296	1.40845	8.70839e-07	1.17292	5.33964e-06	-0.0356999	0.825454	0.199823	0.314226
Q5JTV8	Torsin-1A-interacting protein 1	TOR1AIP1	TRLQQQHSEQPPLQPSPVMTRRGLRDSHSSE	143	-0.100658	0.732956	0.00800622	0.953447	-0.0926519	0.499954	0.196167	0.251052	0.296825	0.171179
Q5JTV8	Torsin-1A-interacting protein 1	TOR1AIP1	RMQNDSILKSELGNQSPSTSSRQVTGQPQNA	315	-0.0248875	0.95113	-1.17579	3.48458e-05	-1.20068	4.34035e-05	0.156781	0.467055	0.181668	0.571582
Q5JTV8	Torsin-1A-interacting protein 1	TOR1AIP1	SSHSSVTTVKARSRDSDESGDKTTRSSSQYI	242	-0.11341	0.581194	0.0813246	0.414197	-0.0320851	0.75202	-0.0976929	0.453353	0.0157168	0.961424
Q5JWF2	Guanine nucleotide-binding protein G(s) subunit alpha isoforms XLas	GNAS	AKYFIRDEFLRISTASGDGRHYCYPHFTCAV	995	0.002477	0.99153	0.901611	1.06797e-05	0.904088	1.54331e-05	0.161164	0.23816	0.158687	0.396124
Q5M775	Cytospin-B	SPECC1	PLSGIPVRTAPAAAVSPMQRHSTYSSVRPAS	863	0.426026	0.475607	-1.80387	9.90757e-05	-1.37784	0.000787179	0.660836	0.0840963	0.23481	0.734511
Q5PRF9	Protein Smaug homolog 2	SAMD4B	LGARAAFTTPDHAPLSPQSSVASSGSEQTEE	271	0.988263	0.00256936	1.05207	1.12446e-05	2.04033	3.34811e-07	0.405305	0.0234083	-0.582958	0.00811535
Q5QJE6	Deoxynucleotidyltransferase terminal-interacting protein 2	DNTTIP2	TILRVTRRRQILIACSPVSSVRKKPKVTPTK	117	-0.134746	0.840633	1.83344	8.91937e-05	1.6987	0.000200166	-0.132598	0.732108	0.00214726	0.999727
Q5SRE5	Nucleoporin NUP188 homolog	NUP188	LLSSLSRYFRRGAPSSPATGVLPSPQGKSTS	1709	0.143117	0.616982	2.1077	1.55091e-07	2.25081	3.27162e-07	0.184172	0.294057	0.0410556	0.934182
Q5SSJ5	Heterochromatin protein 1-binding protein 3	HP1BP3	SRKTPQKSRNRKNRSSAVDPEPQVKLEDVLP	249	0.739428	0.0918907	-3.30511	1.4047e-07	-2.56569	1.49084e-06	0.98767	0.00355276	0.248242	0.536385
Q5SW79	Centrosomal protein of 170 kDa	CEP170	YLKRLKGNKHDDGTQSDSENAGAHRRCSKRA	379	-0.289914	0.241409	0.650658	0.00028853	0.360744	0.0120938	-0.0587448	0.716927	0.231169	0.250779
Q5SW79	Centrosomal protein of 170 kDa	CEP170	SGQTDKCREETFKQESQPPEKNSGHSTSKGD	785	-1.51948	0.000459176	1.94438	2.96271e-07	0.424894	0.0104779	-0.417358	0.0307268	1.10212	0.000361362
Q5SW79	Centrosomal protein of 170 kDa	CEP170	ETEISESGMTVRSTGSATSLASQGERRRRTL	630	1.97286	0.002517	-1.41209	0.000194893	0.560777	0.0420878	0.815169	0.0222283	-1.1577	0.00811535
Q5SW79	Centrosomal protein of 170 kDa	CEP170	KNSGHSTSKGDRVAQSESKRRKAEEILKSQT	805	0.97471	0.00237876	-3.62303	4.37601e-09	-2.64832	6.24729e-08	1.05082	8.25249e-05	0.076112	0.819618
Q5SXM2	snRNA-activating protein complex subunit 4	SNAPC4	FGGVIPATEPRGTPGSPSGTQEPRGPLGLEK	1224	0.170922	0.308122	0.214348	0.0207795	0.385269	0.000844619	0.143324	0.175501	-0.0275979	0.921442
Q5T0W9	Protein FAM83B	FAM83B	RKTTNLADRNSNVRRSFNGTDNHIRFLQQRM	466	-0.10694	0.756592	0.297031	0.0731342	0.19009	0.238809	-0.293724	0.14523	-0.186784	0.52889
Q5T1M5	FK506-binding protein 15	FKBP15	SEEEEEKAEERPRRPSQEQSASASSGQPQAP	956	-0.16421	0.638622	0.821623	0.000482082	0.657413	0.00238969	-0.276192	0.195729	-0.111982	0.797459
Q5T200	Zinc finger CCCH domain-containing protein 13	ZC3H13	ERDRRDNRERDQRPSSPIRHQGRNDELERDE	643	-0.290007	0.301803	1.06073	2.04187e-05	0.770722	0.000265754	-0.203569	0.247326	0.0864382	0.818412
Q5T200	Zinc finger CCCH domain-containing protein 13	ZC3H13	ERGNIETTSEDGQVFSPKKGQKKKSIEKKRK	993	-0.245266	0.18751	1.00625	1.44074e-06	0.760984	1.64556e-05	-0.248935	0.0434116	-0.00366938	0.991687
Q5T200	Zinc finger CCCH domain-containing protein 13	ZC3H13	RSSPESDRQVHSRSGSFDSRDRLQERDRYEH	1292	-0.526995	0.007486	0.104065	0.210645	-0.42293	0.000450397	-0.571275	0.000333951	-0.0442805	0.857438
Q5T200	Zinc finger CCCH domain-containing protein 13	ZC3H13	EDAQHRKPMDQKRSSSLGSNRSNRSHTSGRL	1191	0.197846	0.295224	-0.0182434	0.846103	0.179602	0.0718216	0.11737	0.323175	-0.0804759	0.703573
Q5T2D3	OTU domain-containing protein 3	OTUD3	QGLNEGRTENNKAQASPSEENKANKNQLAKV	326	1.08998	0.00355182	-2.45458	1.0024e-07	-1.3646	8.63794e-06	1.18781	0.000126776	0.0978259	0.804009
Q5T3I0	G patch domain-containing protein 4	GPATCH4	LTSGGEKPNKDLESCSDDDNQGSKSPKILTD	130	-0.290621	0.408218	1.71393	2.88287e-06	1.42331	1.68335e-05	-0.443866	0.0524136	-0.153244	0.68607
Q5T3I0	G patch domain-containing protein 4	GPATCH4	TSGLGELNSREQTNQSLRKGKKKKRWHHEEE	286	0.885813	0.245548	-3.08646	1.30563e-05	-2.20065	0.000199766	0.593586	0.220346	-0.292227	0.747271
Q5T5P2	Sickle tail protein homolog	KIAA1217	ENTVRRQEQPSIESTSPISRTDEIRKNTYRT	1650	-0.133725	0.540711	-0.180502	0.102207	-0.314227	0.0119508	-0.00164423	0.991685	0.132081	0.502671
Q5T6F2	Ubiquitin-associated protein 2	UBAP2	SFPSQAKLRESTPGDSPSTVNKLLQLPSTTI	473	1.30279	0.381889	-3.75425	0.000346228	-2.45145	0.00585324	1.86036	0.0544107	0.557569	0.747798
Q5T6F2	Ubiquitin-associated protein 2	UBAP2	SSVLSHLDFKSQPEPSPVLSQLSQRQQHQSQ	432	1.02873	0.439572	-4.32194	5.74348e-05	-3.29321	0.000487141	1.51359	0.0765619	0.484866	0.761312
Q5T7B8	Kinesin-like protein KIF24	KIF24	CCTSVTSRNRTSGNSSPKRIQSSPGALSEDK	567	-0.577152	0.0154562	1.40769	3.85767e-07	0.830538	2.40426e-05	-0.0368686	0.797602	0.540283	0.00441804
Q5T8P6	RNA-binding protein 26	RBM26	KEEEREKKFSRRLNHSPPQSSSRYRENRSRD	127	-0.0389445	0.896864	0.993927	2.20348e-05	0.954983	4.30301e-05	-0.125117	0.464904	-0.0861723	0.804459
Q5T8P6	RNA-binding protein 26	RBM26	TKKTWFDKPNFNRTNSPGFQKKVQFGNENTK	518	0.634775	0.0154562	-2.44951	2.36492e-08	-1.81474	3.81346e-07	0.720186	0.000712085	0.085411	0.768744
Q5TAQ9	DDB1- and CUL4-associated factor 8	DCAF8	TGHYSINDENRVHDRSEEEEEEEEEEEEEQP	99	-0.622028	0.239047	1.2428	0.00060516	0.620768	0.0322951	-0.0275415	0.939516	0.594486	0.154883
Q5TAX3	Terminal uridylyltransferase 4	ZCCHC11	VNIEAVGGEKCALQNSPRSQKQQTCTDNTGD	209	0.429533	0.22126	-0.0392747	0.821286	0.390258	0.0405638	0.663949	0.0104408	0.234416	0.449448
Q5TCZ1	SH3 and PX domain-containing protein 2A	SH3PXD2A	SAAAEAKGRLAERAASQGSDSPLLPAQRNSI	1038	-0.495105	0.366806	1.49093	0.000206461	0.995828	0.00339363	-0.544744	0.115296	-0.0496388	0.959949
Q5TCZ1	SH3 and PX domain-containing protein 2A	SH3PXD2A	AKGRLAERAASQGSDSPLLPAQRNSIPVSPV	1043	-0.209741	0.801443	-1.1927	0.00696247	-1.40244	0.00310245	-0.0533284	0.917099	0.156413	0.895009
Q5TCZ1	SH3 and PX domain-containing protein 2A	SH3PXD2A	AKPSVRPKPFLNRAESQSQEKMDISTLRRQL	767	0.362273	0.402288	0.417611	0.062542	0.779884	0.0035351	-0.513131	0.065185	-0.875404	0.0139227
Q5TCZ1	SH3 and PX domain-containing protein 2A	SH3PXD2A	SPAVARIAPQRAQISSPNLRTRPPPRRESSL	421	-0.0374306	0.81533	-0.406886	0.000162095	-0.444317	0.000116074	-0.0872261	0.33456	-0.0497955	0.781504
Q5TCZ1	SH3 and PX domain-containing protein 2A	SH3PXD2A	KEAEEGPTGASESQDSPRKLKYEEPEYDIPA	547	-0.0508981	0.77798	0.709905	6.99714e-06	0.659007	1.82222e-05	-0.122856	0.230339	-0.0719582	0.685817
Q5TCZ1	SH3 and PX domain-containing protein 2A	SH3PXD2A	AEDTLSARGSSGDSDSPGSSSLSLTRKNSPK	644	0.374321	0.211896	-1.43606	3.45521e-06	-1.06174	4.57663e-05	0.376927	0.0549593	0.00260574	0.997187
Q5TCZ1	SH3 and PX domain-containing protein 2A	SH3PXD2A	AVGVPDRTVSRLAQGSPAVARIAPQRAQISS	406	0.0916971	0.821363	-1.60592	6.49641e-06	-1.51422	1.53523e-05	-0.00132338	0.995086	-0.0930205	0.865045
Q5THJ4	Vacuolar protein sorting-associated protein 13D	VPS13D	RYAAPDKNSSSSTIGSPSSRTNIIHPQVYFS	3010	1.03845	0.0239914	-1.98779	4.17109e-06	-0.949338	0.00101643	1.1544	0.00150504	0.115941	0.849239
Q5U3C3	Transmembrane protein 164	TMEM164	ALRHILRQTKEDGRGSPGSQPEQVTQRPEEG	71	0.454432	0.0435066	-0.828781	1.709e-05	-0.374349	0.00450765	-0.116389	0.393766	-0.57082	0.00322205
Q5U4P2	Aspartate beta-hydroxylase domain-containing protein 1	ASPHD1	GVRGGPVGCSEAGGPSPGGPGDPGEGPRTEG	129	0.019112	0.943906	-0.908388	1.30563e-05	-0.889276	2.22845e-05	0.105171	0.468171	0.086059	0.747271
Q5UIP0	Telomere-associated protein RIF1	RIF1	QKLRELDPSLVSANDSPSGMQTRCVWSPLAS	2161	0.736809	0.00327468	-0.21685	0.0425152	0.51996	0.000382447	0.793865	0.000126776	0.0570552	0.83909
Q5UIP0	Telomere-associated protein RIF1	RIF1	SRKKRSGKWKNKSNESVDIQDQEEKVVKQEC	1579	0.0306904	0.925885	0.41356	0.00950208	0.444251	0.00714372	-0.57283	0.00652785	-0.603521	0.0100842
Q5UIP0	Telomere-associated protein RIF1	RIF1	NLRTRNAIKRLHKRDSFDNCSLGESSKIGIS	1688	-0.415265	0.187504	0.520835	0.00535745	0.10557	0.502984	-0.221058	0.259825	0.194208	0.495791
Q5UIP0	Telomere-associated protein RIF1	RIF1	SILKRGLKRSQEDEISSPVNKVRRVSFADPI	2195	0.319566	0.418184	-0.688888	0.00384114	-0.369322	0.0740674	0.413583	0.100167	0.0940169	0.871923
Q5UIP0	Telomere-associated protein RIF1	RIF1	ILKRGLKRSQEDEISSPVNKVRRVSFADPIY	2196	0.215008	0.539879	-0.589625	0.00456971	-0.374618	0.0444319	0.430663	0.0570015	0.215656	0.492278
Q5VSL9	Striatin-interacting protein 1	STRIP1	LPEDSIKVIRNMRAASPPASASDLIEQQQKR	335	-0.047891	0.867873	0.619754	0.000446227	0.571863	0.000912542	0.00295126	0.986913	0.0508423	0.898926
Q5VT06	Centrosome-associated protein 350	CEP350	EEMLKERQSDQDMNHSPNIQSGKDIHEQKNT	2341	-0.175192	0.503571	-0.907475	3.36298e-05	-1.08267	1.41187e-05	0.361927	0.0369975	0.53712	0.0128021
Q5VT52	Regulation of nuclear pre-mRNA domain-containing protein 2	RPRD2	PIETLGYHSASNRRMSGEPIQTVESIRVPGK	1099	-0.2357	0.637646	-0.0885302	0.707226	-0.324231	0.187516	-0.459941	0.132863	-0.224241	0.659986
Q5VT52	Regulation of nuclear pre-mRNA domain-containing protein 2	RPRD2	LPSSAQPFIPKSFNYSPNSSTSEVSSTSASK	593	-0.0301273	0.975434	0.287616	0.399998	0.257489	0.462521	0.135065	0.76783	0.165193	0.874674
Q5VTL8	Pre-mRNA-splicing factor 38B	PRPF38B	HSDSKDQSDKHDRRRSQSIEQESQEKQHKNK	527	0.264431	0.739664	-0.063837	0.860912	0.200594	0.585323	-0.307674	0.515883	-0.572105	0.349946
Q5VTL8	Pre-mRNA-splicing factor 38B	PRPF38B	DSKDQSDKHDRRRSQSIEQESQEKQHKNKDE	529	-0.213687	0.832026	1.98453	0.000934007	1.77085	0.00224169	-0.568997	0.315626	-0.355309	0.736107
Q5VUA4	Zinc finger protein 318	ZNF318	NLYQWGPLPGIPKDNSPLREKFGSFLCHKDN	464	-0.0715691	0.783675	0.529495	0.000858492	0.457926	0.0025054	0.0242866	0.879896	0.0958556	0.72782
Q5VWG9	Transcription initiation factor TFIID subunit 3	TAF3	LETKSFTPKTKTKTSSPGQKTKSPKTAQSPA	278	0.225496	0.360625	0.838184	4.05053e-05	1.06368	1.11951e-05	0.471134	0.00936453	0.245638	0.20997
Q5VWQ0	Round spermatid basic protein 1	RSBN1	PHAGVSPRGVKRQRRSSSGGSQEKRGRPSQE	91	-0.219133	0.170932	2.12971	5.97194e-09	1.91058	3.96547e-08	0.0844698	0.404833	0.303602	0.0199241
Q5VWQ0	Round spermatid basic protein 1	RSBN1	HAGVSPRGVKRQRRSSSGGSQEKRGRPSQEP	92	-0.219974	0.176967	1.71206	2.22654e-08	1.49209	1.53636e-07	0.0519014	0.626927	0.271876	0.0377872
Q5VYV7	Protein SLX4IP	SLX4IP	IAEIARRRNDGQASSSPPSESMGQAKDSIKA	213	-0.075497	0.760226	0.65591	0.000147481	0.580413	0.000425501	0.0324759	0.831058	0.107973	0.653922
Q5VZK9	Leucine-rich repeat-containing protein 16A	LRRC16A	PVLKKVPSDKERDGQSSPQPSPRTFSQEVSR	1314	0.526367	0.295447	0.974998	0.00212182	1.50137	0.000151176	0.187532	0.565084	-0.338835	0.443367
Q5VZK9	Leucine-rich repeat-containing protein 16A	LRRC16A	VLKKVPSDKERDGQSSPQPSPRTFSQEVSRR	1315	0.336013	0.409345	1.1157	0.000195811	1.45172	4.15329e-05	0.137154	0.602862	-0.198858	0.634574
Q5VZK9	Leucine-rich repeat-containing protein 16A	LRRC16A	QGEEIGKVERSDSKSSPQAGRRYGVQVMGSG	1151	-0.234949	0.398393	0.764803	0.000188174	0.529854	0.00252251	-0.0833045	0.64532	0.151644	0.560513
Q5VZL5	Zinc finger MYM-type protein 4	ZMYM4	EQGDLKCGGVEQASSSPRSDPLGSTQDHALS	1241	-0.283829	0.173055	0.699982	4.62326e-05	0.416153	0.00198433	-0.284645	0.0400556	-0.000815888	0.999727
Q5VZL5	Zinc finger MYM-type protein 4	ZMYM4	TDDSLEVERRVTQHESDNENEIQIQNKLKKD	122	-0.118755	0.690364	1.08314	1.84431e-05	0.964381	6.10714e-05	-0.13752	0.447774	-0.0187647	0.96524
Q641Q2	WASH complex subunit FAM21A;WASH complex subunit FAM21C	FAM21A;FAM21C	FGDEEGDLFKEKAVASPEATVSQTDENKARA	498	1.63701	0.000449797	-1.63125	1.4576e-06	0.00575966	0.970353	1.76578	1.05304e-05	0.128768	0.702817
Q641Q2	WASH complex subunit FAM21A;WASH complex subunit FAM21C	FAM21A;FAM21C	KPRKTLKEKKERRTPSDDEEDNLFAPPKLTD	333	-0.425627	0.0356519	1.68458	6.2619e-08	1.25895	9.518e-07	-0.135834	0.257513	0.289793	0.057397
Q659C4	La-related protein 1B	LARP1B	KENRETKLNGPGENVSEDEAQSSNQRKRANK	60	-0.386724	0.0873582	1.051	3.57271e-06	0.664275	0.000140188	-0.095169	0.502412	0.291556	0.0922103
Q66K14	TBC1 domain family member 9B	TBC1D9B	SPAPQEGSEQPASPASPLSSRQSFCAQEAPT	435	-0.132734	0.880347	2.76154	3.24791e-05	2.6288	6.54315e-05	0.239357	0.641709	0.372091	0.650266
Q66K14	TBC1 domain family member 9B	TBC1D9B	EGSGSEERGEEKGTSSPDYRHYLRMWAKEKE	995	0.384834	0.109817	-0.910244	1.81424e-05	-0.525411	0.00107393	0.416143	0.0146488	0.0313092	0.945672
Q66K74	Microtubule-associated protein 1S;MAP1S heavy chain;MAP1S light chain	MAP1S	EFEHRKAVPMAPAPASPGSSNDSSARSQERA	759	-0.311604	0.448165	0.884262	0.00103429	0.572658	0.0141699	-0.205887	0.429894	0.105718	0.861944
Q66PJ3	ADP-ribosylation factor-like protein 6-interacting protein 4	ARL6IP4	QVEALPGPSLDQWHRSAGEEEDGPVLTDEQK	148	-0.180793	0.524677	0.98432	3.36298e-05	0.803527	0.000193564	-0.206064	0.238668	-0.0252713	0.959949
Q68CZ2	Tensin-3	TNS3	RGVGSGPHPPDTQQPSPSKAFKPRFPGDQVV	660	0.532018	0.0518571	-0.216041	0.106569	0.315977	0.0288323	0.128588	0.443046	-0.40343	0.0525527
Q68DQ2	Very large A-kinase anchor protein	CRYBG3	SDGSDTTEQESTNLPSPNKSIRHEHLQLPES	457	0.167629	0.474582	0.635172	0.000215259	0.8028	5.55255e-05	0.480245	0.0066438	0.312616	0.0870303
Q68E01	Integrator complex subunit 3	INTS3	SSTKPPKSRRKAALSSPRSRKNATQPPNAEE	995	-0.279413	0.0870908	0.918179	9.13882e-07	0.638766	1.83931e-05	-0.433459	0.0014583	-0.154045	0.226818
Q69YH5	Cell division cycle-associated protein 2	CDCA2	KNKSESENEPKAGTDSPVSCASVTEERVASD	710	1.1825	0.000399465	-2.53393	8.44058e-09	-1.35143	8.16692e-07	1.53768	1.99707e-06	0.355181	0.0287513
Q69YN4	Protein virilizer homolog	KIAA1429	NPKHADGEKEDQFNGSPPRPQPRGPRTPPGP	173	-0.152381	0.415528	0.922793	2.7143e-06	0.770412	1.52963e-05	-0.196347	0.0993436	-0.0439668	0.874674
Q69YN4	Protein virilizer homolog	KIAA1429	DLHSELERSFLSEPSSPGRTKTTKGFKLGKH	1579	-0.430687	0.0243477	1.29012	1.94306e-07	0.859436	5.4208e-06	-0.266092	0.0282099	0.164595	0.251176
Q69YQ0	Cytospin-A	SPECC1L	SESEGIPSIERSRKGSSGNASEVSVACLTER	384	0.108101	0.680678	0.501058	0.0016689	0.609159	0.000556002	-0.3041	0.0606142	-0.412201	0.0386493
Q6AW86	Zinc finger protein 324B	ZNF324B	DACHSVKSLQRQPGASPSQERKPTGVSVIYW	129	0.150675	0.650921	-0.575002	0.00330678	-0.424327	0.0183389	0.568775	0.0136099	0.4181	0.0962181
Q6DCA0	AMMECR1-like protein	AMMECR1L	SGRENVSDLTLGPGNSPITRMNPASGALSPL	74	0.190431	0.61774	-1.507	1.22447e-05	-1.31657	4.68526e-05	0.225003	0.338253	0.0345722	0.959949
Q6DN90	IQ motif and SEC7 domain-containing protein 1	IQSEC1	KRQSAYERSLGGQQGSPKHGPHSGAPKSLPR	417	0.155503	0.398141	-0.565541	8.38059e-05	-0.410038	0.000939666	0.304107	0.0183987	0.148605	0.321706
Q6GQQ9	OTU domain-containing protein 7B	OTUD7B	ASAGDEPRSTPESGDSDKESVGSSSTSNEGG	467	0.197303	0.728525	1.05309	0.00178177	1.25039	0.000692537	0.503651	0.132863	0.306348	0.535176
Q6IBW4	Condensin-2 complex subunit H2	NCAPH2	EASAPKAALEPKESRSPQQSAALPRRYMLRE	284	0.300338	0.169781	0.657869	0.000105445	0.958207	1.05971e-05	0.121085	0.381097	-0.179253	0.318676
Q6IBW4	Condensin-2 complex subunit H2	NCAPH2	ALDFISGKRRAKQLSSVQEDRANGVASSGVP	96	0.976445	0.65797	-3.6223	0.00454259	-2.64585	0.0247379	0.83948	0.542203	-0.136965	0.966031
Q6IQ22	Ras-related protein Rab-12	RAB12	ALQRRAGGGGGLGAGSPALSGGQGRRRKQPP	21	-0.139115	0.754073	-0.451673	0.0391342	-0.590788	0.0124717	0.0401951	0.884602	0.17931	0.687981
Q6IQ49	Protein SDE2 homolog	SDE2	PSGSQRARVVNTDHGSPEQLQIPVTDSGRHI	278	0.537977	0.00865103	-0.355355	0.00176698	0.182622	0.054674	0.452905	0.00211853	-0.0850723	0.648269
Q6KC79	Nipped-B-like protein	NIPBL	GSPKNNTAAETEDDESDGEDRGGGTSGSLRR	2672	0.186278	0.747718	1.03789	0.00201253	1.22417	0.000826681	0.138304	0.692269	-0.0479739	0.959949
Q6NUJ5	PWWP domain-containing protein 2B	PWWP2B	APEEGDAEVMQLGSSSPPPARGVQPPETTRP	84	0.31553	0.517803	0.322402	0.178703	0.637932	0.0183389	-0.158288	0.615221	-0.473818	0.218534
Q6NXT1	Ankyrin repeat domain-containing protein 54	ANKRD54	GGGAGLSGRASGGAQSPLRYLHVLWQQDAEP	63	-0.113676	0.547488	1.26826	3.14544e-07	1.15458	1.31685e-06	0.214441	0.0768186	0.328117	0.0302212
Q6NYC8	Phostensin	PPP1R18	QELSLRPLEARDWRQSPGEVGDRSSRLSEAW	175	0.152663	0.8903	-1.79862	0.00290373	-1.64595	0.00547326	0.376997	0.554546	0.224334	0.87967
Q6NZY4	Zinc finger CCHC domain-containing protein 8	ZCCHC8	DISNGGSQKLFPADTSPSTATKIHSPIPDMS	649	0.59979	0.0319067	-1.74605	3.74735e-07	-1.14626	1.1335e-05	0.565552	0.00533428	-0.0342382	0.945672
Q6P158	Putative ATP-dependent RNA helicase DHX57	DHX57	KALLRDLQEQDADAGSERGLSGEEEDDEPDC	127	-0.640534	0.028922	0.887522	6.19861e-05	0.246988	0.0853564	-0.385337	0.0367281	0.255196	0.249967
Q6P158	Putative ATP-dependent RNA helicase DHX57	DHX57	DLQEQDADAGSERGLSGEEEDDEPDCCNDER	132	0.00470736	0.988528	1.31232	2.07352e-06	1.31702	3.58139e-06	-0.181257	0.255651	-0.185964	0.39481
Q6P1L5	Protein FAM117B	FAM117B	APVCKAGDKTRQPSSSPSSIIRRTSSLDTLA	210	0.354775	0.462583	-0.787044	0.0057996	-0.43227	0.0861675	0.393375	0.19532	0.0386006	0.961248
Q6P1M3	Lethal(2) giant larvae protein homolog 2	LLGL2	GNGAGPKKAPSRARNSGTQSDGEEKQPGLVM	961	0.0409837	0.936467	1.29043	0.000107684	1.33142	0.000115657	-0.301492	0.260732	-0.342476	0.337064
Q6P2E9	Enhancer of mRNA-decapping protein 4	EDC4	HLLQQRDSQDASAEQSDHDDEVASLASASGG	879	-0.546375	0.0347286	1.5234	5.68192e-07	0.977024	1.98401e-05	-0.453259	0.0114103	0.0931158	0.747271
Q6P2E9	Enhancer of mRNA-decapping protein 4	EDC4	TAPDITRETCSTLAESPRNGLQEKHKSLAFH	844	1.37763	0.0302179	-1.63606	0.000206461	-0.258427	0.388239	1.46042	0.00250641	0.0827867	0.939541
Q6P4F7	Rho GTPase-activating protein 11A	ARHGAP11A	TNLSKPRPMRIAKQQSLETCEKTVSESSQMT	787	0.436168	0.473468	0.187437	0.524522	0.623605	0.0535244	-0.272206	0.480908	-0.708375	0.13655
Q6P4F7	Rho GTPase-activating protein 11A	ARHGAP11A	ESGSNLHALMNQRQSSVTNVGKVKLTEPSYL	620	0.413993	0.191868	0.264211	0.103259	0.678204	0.00132508	-0.509456	0.0217293	-0.923448	0.00205425
Q6P5R6	60S ribosomal protein L22-like 1	RPL22L1	TYELRYFQISQDEDESESED___________	118	-0.182529	0.423406	0.696603	9.12226e-05	0.514075	0.000905486	-0.122725	0.393766	0.0598033	0.857565
Q6PCE3	Glucose 1,6-bisphosphate synthase	PGM2L1	AVQKLKAVAGVMITASHNRKEDNGYKVYWET	175	-0.278443	0.367186	0.406326	0.0172759	0.127883	0.404657	0.0142676	0.946312	0.292711	0.234268
Q6PD62	RNA polymerase-associated protein CTR9 homolog	CTR9	RKKKKRRRHPKGEEGSDDDETENGPKPKKRR	970	-0.220163	0.272642	1.22012	6.71517e-07	0.999961	4.62453e-06	-0.15495	0.221804	0.0652127	0.804428
Q6PD62	RNA polymerase-associated protein CTR9 homolog	CTR9	DDDLPISKKKKRRKGSGSEQEGEDEEGGERK	941	0.0873497	0.886879	1.14224	0.00117606	1.22959	0.00086031	0.249644	0.468171	0.162294	0.822976
Q6PD62	RNA polymerase-associated protein CTR9 homolog	CTR9	AGSPRRPRRQRSDQDSDSDQPSRKRRPSGSE	1085	-0.530597	0.144981	1.92097	1.59792e-06	1.39038	2.52251e-05	-0.101306	0.67016	0.429291	0.13284
Q6PD62	RNA polymerase-associated protein CTR9 homolog	CTR9	SDQPSRKRRPSGSEQSDNESVQSGRSHSGVS	1102	-0.459598	0.651864	-0.740387	0.136322	-1.19999	0.0272514	0.227706	0.722103	0.687304	0.417891
Q6PGQ7	Protein aurora borealis	BORA	TQRCWMKTASPFQCSSP______________	558	0.475219	0.554919	1.51941	0.00240106	1.99463	0.000489194	0.925913	0.0739426	0.450695	0.548923
Q6PJF5	Inactive rhomboid protein 2	RHBDF2	ESSEKRPGFRRQASLSQSIRKGAAQWFGVSG	115	0.908524	0.113961	0.865441	0.00850304	1.77396	0.00010974	0.422558	0.233251	-0.485967	0.297156
Q6PJG6	BRCA1-associated ATM activator 1	BRAT1	RDKIASYSSLREARGSPNTASAEATLPRWRA	742	0.187567	0.739664	-1.13569	0.000996543	-0.948125	0.00351652	0.0551366	0.875208	-0.13243	0.865045
Q6PJT7	Zinc finger CCCH domain-containing protein 14	ZC3H14	PSARPEKRDSRVSTSSQESKTTNVRQTYDDG	135	-0.956825	0.00429736	1.03	1.98758e-05	0.0731734	0.590725	-0.437336	0.0217293	0.519489	0.0196895
Q6PK04	Coiled-coil domain-containing protein 137	CCDC137	AGRGAAVSRVQAGPGSPRRARGRQQVQPLGK	19	-0.036549	0.8903	1.45632	5.44395e-07	1.41977	1.3421e-06	-0.11731	0.429894	-0.080761	0.781504
Q6PKG0	La-related protein 1	LARP1	DMKEQEKGEGSDSKESPKTKSDESGEEKNGD	220	0.624001	0.127859	-1.59915	1.43572e-05	-0.975146	0.000610352	0.723863	0.0134052	0.0998623	0.86605
Q6PKG0	La-related protein 1	LARP1	VPRQHYQKETESAPGSPRAVTPVPTKTEEVS	521	0.580543	0.382881	0.87813	0.016856	1.45867	0.00105197	0.236405	0.579657	-0.344138	0.598207
Q6PKG0	La-related protein 1	LARP1	TKNALPPVLTTVNGQSPPEHSAPAKVVRAAV	143	0.146944	0.585874	-0.709553	0.000256048	-0.562609	0.00143397	-0.00925988	0.960825	-0.156204	0.52889
Q6PKG0	La-related protein 1	LARP1	EGSDSKESPKTKSDESGEEKNGDEDCQRGGQ	228	-0.922276	0.463966	2.47875	0.00186876	1.55648	0.0253081	-0.343663	0.677165	0.578613	0.663581
Q6PKG0	La-related protein 1	LARP1	EPSTIARSLPTTVPESPNYRNTRTPRTPRTP	774	0.0993946	0.840633	0.171274	0.425838	0.270668	0.224391	-0.0422185	0.8874	-0.141613	0.804459
Q6PL18	ATPase family AAA domain-containing protein 2	ATAD2	TGESSVEENEKQQNASESKLELRNNSNTCNI	1233	-0.938	0.0739781	0.825228	0.00607305	-0.112771	0.657169	-1.50066	0.000898144	-0.562663	0.161711
Q6PL18	ATPase family AAA domain-containing protein 2	ATAD2	EGKEMCVLRMTRARRSQVEQQQLITVEKALA	1302	-0.455927	0.493079	-1.62814	0.000418888	-2.08406	9.91824e-05	0.491785	0.23174	0.947712	0.0659793
Q6R327	Rapamycin-insensitive companion of mTOR	RICTOR	RGRSLKNLRVRGRNDSGEENVPLDLTREPSD	21	-0.267128	0.569234	0.403678	0.0912447	0.13655	0.55992	0.0385068	0.90195	0.305635	0.456783
Q6RI45	Bromodomain and WD repeat-containing protein 3	BRWD3	KQKQMKLQPKNDQNTSVSHARTSSPFSSPVS	1485	1.48923	0.363564	-1.8299	0.0360692	-0.340672	0.675375	-1.06491	0.296827	-2.55414	0.0482989
Q6UVJ0	Spindle assembly abnormal protein 6 homolog	SASS6	TFPHSISAKNTSHPGSGTKVQFNLQFTKPNA	555	0.929951	0.414526	-3.44767	9.62452e-05	-2.51772	0.00101934	0.758488	0.285535	-0.171463	0.929942
Q6WCQ1	Myosin phosphatase Rho-interacting protein	MPRIP	LRTLLTGDGGGEATGSPLAQGKDAYELEVLL	891	1.01125	0.00191166	-3.47743	5.13988e-09	-2.46619	1.02369e-07	0.717076	0.00107849	-0.29417	0.135486
Q6XZF7	Dynamin-binding protein	DNMBP	___________MEAGSVVRAIFDFCPSVSEE	5	0.530586	0.0915132	-3.36128	1.89073e-08	-2.83069	1.52281e-07	0.734118	0.00293265	0.203532	0.453185
Q6Y7W6	PERQ amino acid-rich with GYF domain-containing protein 2	GIGYF2	EVGPRNSTNKNKNNASLSKSVGVSNRQNKKV	1100	0.0407186	0.918573	-0.331052	0.0610901	-0.290334	0.0985819	-0.19811	0.353787	-0.238828	0.40749
Q6ZN18	Zinc finger protein AEBP2	AEBP2	VGSSGGSSSDETRSLSPGAASSSSGDGDGKE	141	-0.0377445	0.869489	0.00216001	0.983199	-0.0355845	0.724155	-0.0521703	0.694958	-0.0144258	0.962023
Q6ZNB6	NF-X1-type zinc finger protein NFXL1	NFXL1	GGREKGSVGAVPSGTSPGGVATTAAAGSRHS	50	1.59566	0.0333031	-4.41811	5.60658e-07	-2.82245	1.99563e-05	1.56093	0.00454426	-0.0347267	0.975664
Q6ZRP7	Sulfhydryl oxidase 2	QSOX2	GRDNLLDTYSADQGDSSEGGTLARGEEEEKR	578	-0.160045	0.356067	1.4031	1.01004e-07	1.24306	5.73193e-07	-0.154071	0.1563	0.00597374	0.981108
Q6ZRV2	Protein FAM83H	FAM83H	PVPQENGQPESPRRLSLGQGDSTEAATEERG	1003	-0.228161	0.289578	-0.441609	0.00151458	-0.66977	0.000115975	-0.588143	0.00147343	-0.359982	0.0377872
Q6ZRV2	Protein FAM83H	FAM83H	VPAAFPTKVPVPGPGSGGNGPEREGPEEPGL	647	0.298195	0.18073	-0.881343	1.43636e-05	-0.583148	0.00035686	-0.275983	0.0578401	-0.574178	0.00393145
Q6ZS17	Protein FAM65A	FAM65A	LRDGAYNMVRAYTTGSPGSREARDSLAEATR	171	1.54815	0.00171712	-3.94076	2.22654e-08	-2.39261	1.08343e-06	1.47594	0.000128664	-0.072214	0.906962
Q6ZSS7	Major facilitator superfamily domain-containing protein 6	MFSD6	SEIQPLQGTNENRENSPAGRAQPVPCETHSD	733	-0.0583408	0.903894	-0.616804	0.010982	-0.675145	0.00746478	-0.0184505	0.950272	0.0398903	0.959949
Q6ZUM4	Rho GTPase-activating protein 27	ARHGAP27	SIHKSSQDGDTPAQASPPEEKVPAELDEVGS	466	0.186431	0.397993	-0.7492	3.94609e-05	-0.562769	0.000384042	0.387296	0.0137002	0.200865	0.255345
Q6ZUT6	Uncharacterized protein C15orf52	C15orf52	VSEKPTRARNQGIEGSPGGRVTRSPPTQVAI	193	0.748395	0.0302179	-1.21554	2.11499e-05	-0.467146	0.0125184	0.438552	0.0420592	-0.309843	0.234472
Q6ZW31	Rho GTPase-activating protein SYDE1	SYDE1	DPEVVTRPRGRGGPESPPSNRYAGDWSVCGR	645	0.158673	0.419527	0.629579	6.51612e-05	0.788252	1.8303e-05	-0.364056	0.0110626	-0.522729	0.00314669
Q6ZW76	Ankyrin repeat and SAM domain-containing protein 3	ANKS3	PPRAATDREGFLAESSPQTQRAPYSGPQDLA	416	0.822162	0.324046	-1.73634	0.00133966	-0.914176	0.042361	0.822288	0.120564	0.000126391	0.999997
Q70CQ2	Ubiquitin carboxyl-terminal hydrolase 34	USP34	RDSSIIDPGTEQDLPSPENSSVKEYRMEVPS	3406	-2.29408	0.000449797	2.87887	2.50211e-07	0.584789	0.0131708	0.531594	0.0494644	2.82568	1.24713e-05
Q71RC2	La-related protein 4	LARP4	VSPPSTTKPSRASTASPCNNNINAATAVALQ	597	0.200862	0.599218	0.179097	0.332218	0.379959	0.0581933	0.295713	0.212708	0.0948512	0.865428
Q76L83	Putative Polycomb group protein ASXL2	ASXL2	KPATWEGKQSDGQTGSPQNSNSSFSSSVKVE	224	0.284391	0.134654	-0.454009	0.000501653	-0.169619	0.0850608	0.628383	0.000387848	0.343992	0.0244126
Q7L014	Probable ATP-dependent RNA helicase DDX46	DDX46	RRSRSRSRGRRSRSSSPGNKSKKTENRSRSK	106	-0.277888	0.612669	1.13469	0.00122946	0.856798	0.007387	-0.157777	0.65653	0.120111	0.881863
Q7L1Q6	Basic leucine zipper and W2 domain-containing protein 1	BZW1	QMKKFVEWLKNAEEESESEAEEGD_______	411	-0.207755	0.618386	1.63721	1.28597e-05	1.42946	4.9199e-05	0.138545	0.602862	0.3463	0.301621
Q7L1Q6	Basic leucine zipper and W2 domain-containing protein 1	BZW1	____MNNQKQQKPTLSGQRFKTRKRDEKERF	12	0.727601	0.0231873	-2.78623	3.88421e-08	-2.05862	6.7221e-07	0.388365	0.0473495	-0.339236	0.146527
Q7L2J0	7SK snRNA methylphosphate capping enzyme	MEPCE	GGTERGPGRCAPSAGSPAAAVGRESPGAAAT	60	-0.292883	0.204421	1.82277	1.23141e-07	1.52988	9.07826e-07	-0.287356	0.0570015	0.00552642	0.98888
Q7L2J0	7SK snRNA methylphosphate capping enzyme	MEPCE	CAPSAGSPAAAVGRESPGAAATSSSGPQAQQ	69	-1.00337	0.287187	1.28496	0.0154382	0.281587	0.554547	-0.462066	0.444593	0.541302	0.54307
Q7L4I2	Arginine/serine-rich coiled-coil protein 2	RSRC2	SPDRDKKKEQSEVSVSPRASKHHYSRSRSRS	32	-0.355998	0.259758	0.912018	0.00014801	0.55602	0.0043498	-0.250988	0.208914	0.10501	0.797459
Q7L7X3	Serine/threonine-protein kinase TAO1	TAOK1	YREEGDPRTRASDPQSPPQVSRHKSHYRNRE	421	0.358062	0.203508	0.0910033	0.506999	0.449066	0.00733615	0.448177	0.0224773	0.0901141	0.806334
Q7L7X3	Serine/threonine-protein kinase TAO1	TAOK1	PMQGVPRGSSMGVRNSPQALRRTASGGRTEQ	965	-0.286322	0.324046	-0.0683113	0.629418	-0.354634	0.0271147	-0.256679	0.160406	0.0296436	0.959949
Q7LBC6	Lysine-specific demethylase 3B	KDM3B	KKRESIEGKDGRRRKSASDSGCDPASKKLKG	289	-0.0964249	0.711227	-0.935759	1.89833e-05	-1.03218	1.41654e-05	-0.116459	0.45964	-0.0200342	0.961248
Q7RTP6	Protein-methionine sulfoxide oxidase MICAL3	MICAL3	KKEKDLDGAGKRRKTSQSEEEEAPRGHRGER	685	0.252439	0.344671	0.543625	0.00151877	0.796064	0.000147633	0.0829637	0.635095	-0.169475	0.477565
Q7Z2E3	Aprataxin	APTX	EAKNPGLETHRKRKRSGNSDSIERDAAQEAE	132	-0.412639	0.0472662	0.91272	4.72994e-06	0.500081	0.000466439	-0.371965	0.010857	0.0406739	0.897002
Q7Z2K6	Endoplasmic reticulum metallopeptidase 1	ERMP1	PEREARAQEPLVDGCSGGGRTRKRSPGGSGG	44	0.325203	0.534828	-2.20612	8.11659e-06	-1.88092	3.82599e-05	0.218886	0.511909	-0.106316	0.89605
Q7Z2W4	Zinc finger CCCH-type antiviral protein 1	ZC3HAV1	DAPVDDLTRKFTYLGSQDRARPPSGSSKATD	302	-0.0612119	0.934767	-1.59155	0.00035019	-1.65277	0.000336113	0.18028	0.661551	0.241492	0.745387
Q7Z2W4	Zinc finger CCCH-type antiviral protein 1	ZC3HAV1	FLASASASAERSCTPSPDQISHRASLEDAPV	275	0.191757	0.799664	0.393092	0.246015	0.584849	0.100701	0.115144	0.801499	-0.0766125	0.957782
Q7Z2W4	Zinc finger CCCH-type antiviral protein 1	ZC3HAV1	ARRKTVFSPTLPAARSSLGSLQTPEAVTTRK	386	0.506067	0.414748	-2.89563	3.95614e-06	-2.38957	2.40621e-05	-0.01088	0.980093	-0.516947	0.30919
Q7Z309	Protein FAM122B	FAM122B	LSQVFQPYTLRTRRNSTTIMSRHSLEEGLDM	50	-0.447158	0.127728	0.872962	0.00010406	0.425804	0.0111943	-0.325346	0.0811934	0.121811	0.708139
Q7Z333	Probable helicase senataxin	SETX	PVGEMKNSCNVLHPQSPNNSNRQGCKVPFGE	1663	0.571354	0.25926	-1.21453	0.000534922	-0.643177	0.023063	0.548268	0.0924871	-0.0230862	0.978074
Q7Z3C6	Autophagy-related protein 9A	ATG9A	QAQAEPERHVWHRRESDESGESAPDEGGEGA	735	-0.0899785	0.861089	0.296324	0.186625	0.206345	0.361467	-0.471996	0.10169	-0.382018	0.302242
Q7Z3C6	Autophagy-related protein 9A	ATG9A	GSRHRAEVASALRSFSPLQPGQAPTGRAHST	656	0.349931	0.646901	-1.61225	0.000949283	-1.26232	0.00487286	0.235364	0.625416	-0.114567	0.928327
Q7Z417	Nuclear fragile X mental retardation-interacting protein 2	NUFIP2	YITNGYMGKGADNDGSGSESGYTTPKKRKAR	212	0.995927	0.438911	2.85501	0.000841459	3.85093	0.000140122	0.0410741	0.964453	-0.954853	0.376255
Q7Z417	Nuclear fragile X mental retardation-interacting protein 2	NUFIP2	KVKENLNKTIQNSSVSPTSSSSSSSSTGETQ	376	0.045146	0.948089	-1.83794	6.85806e-05	-1.79279	0.000112451	0.197657	0.597731	0.152511	0.856852
Q7Z460	CLIP-associating protein 1	CLASP1	GKKECDIVSRDGGAASPATEGRGGSEVEGGR	1223	0.340762	0.124086	-1.60802	1.80274e-07	-1.26726	1.76479e-06	0.421308	0.0093287	0.080546	0.757946
Q7Z460	CLIP-associating protein 1	CLASP1	LLHNHLKNSSNTSVGSPSNTIGRTPSRHTSS	1091	1.69664	0.0400769	0.346904	0.366845	2.04355	0.000370277	1.21211	0.0251849	-0.484533	0.496487
Q7Z460	CLIP-associating protein 1	CLASP1	PGSYASLGRIRTRRQSSGSATNVASTPDNRG	646	0.307958	0.44256	2.15243	1.44662e-06	2.46039	1.31685e-06	-0.323717	0.196598	-0.631675	0.0458918
Q7Z4H7	HAUS augmin-like complex subunit 6	HAUS6	QDHLVEEVARAVLSDSPQLSEGKEIKLEELI	552	0.403662	0.460414	-1.82912	4.6926e-05	-1.42546	0.000354986	0.338357	0.322567	-0.0653053	0.954382
Q7Z4S6	Kinesin-like protein KIF21A	KIF21A	GLPSKIGSISRQSSLSEKKIPEPSPVTRRKA	1231	0.265521	0.104161	0.624308	1.64677e-05	0.889828	2.3452e-06	-0.171719	0.0964051	-0.43724	0.00292131
Q7Z4V5	Hepatoma-derived growth factor-related protein 2	HDGFRP2	RPGSDRQERERARGDSEALDEES________	664	0.0811134	0.624846	0.960521	7.55886e-07	1.04163	9.83305e-07	0.0349933	0.739124	-0.0461201	0.837012
Q7Z4V5	Hepatoma-derived growth factor-related protein 2	HDGFRP2	LHDSVREGPDLDRPGSDRQERERARGDSEAL	652	0.193538	0.842231	-0.349367	0.409295	-0.155828	0.718089	0.198431	0.724486	0.00489279	0.998915
Q7Z569	BRCA1-associated protein	BRAP	DELKTTVEERKSSEASPTAQRSKDHSKECIN	97	0.758572	0.0366241	-1.06203	8.91536e-05	-0.303455	0.0914195	0.888616	0.0019539	0.130044	0.748806
Q7Z569	BRCA1-associated protein	BRAP	EIQEGQINIAMASASSPASSGGSGKLPSRKG	571	1.23336	0.15329	-3.96153	4.54054e-06	-2.72817	9.84383e-05	1.54624	0.0131709	0.31288	0.765802
Q7Z5L2	Coiled-coil domain-containing protein R3HCC1L	R3HCC1L	GAVLLKTGDEEESCGSPNSVVKEKQKESSLS	42	0.506861	0.549329	-1.15503	0.0145829	-0.648166	0.134013	0.42874	0.42434	-0.078121	0.959949
Q7Z5L9	Interferon regulatory factor 2-binding protein 2	IRF2BP2	NGFSKLEEPPELNRQSPNPRRGHAVPPTLVP	175	-0.227422	0.699921	0.453125	0.113189	0.225702	0.423115	-0.729879	0.0489156	-0.502457	0.274244
Q7Z5L9	Interferon regulatory factor 2-binding protein 2	IRF2BP2	NQVHSTTRRNSNSPPSPSSMNQRRLGPREVG	460	-0.783727	0.0177488	4.10706	5.13988e-09	3.32334	5.41831e-08	-0.659794	0.0044862	0.123933	0.714089
Q7Z6B7	SLIT-ROBO Rho GTPase-activating protein 1	SRGAP1	SHPRGLLQNRGLNNDSPERRRRPGHGSLTNI	906	-0.075406	0.746983	0.176585	0.106185	0.101179	0.347675	-0.0265643	0.85088	0.0488417	0.87967
Q7Z6E9	E3 ubiquitin-protein ligase RBBP6	RBBP6	AAGAQPRPSANRENFSPERFLPLNIRNSPFT	861	-0.246919	0.175882	1.21317	3.62732e-07	0.966255	3.04689e-06	-0.227186	0.0571513	0.0197328	0.959949
Q7Z6E9	E3 ubiquitin-protein ligase RBBP6	RBBP6	RYHSRSRSPQAFRGQSPNKRNVPQGETEREY	780	-0.218743	0.586699	1.24953	7.84954e-05	1.03078	0.000379339	-0.258174	0.300032	-0.0394313	0.959949
Q7Z6E9	E3 ubiquitin-protein ligase RBBP6	RBBP6	DLPKKGTGDSKKSNSSPSRDRKPHDHKATYD	1535	-0.168566	0.59589	1.3288	8.39956e-06	1.16024	3.30611e-05	-0.238553	0.225024	-0.069987	0.881855
Q7Z6E9	E3 ubiquitin-protein ligase RBBP6	RBBP6	LTRRKDSPSRNKDSASGQKNKPREERDLPKK	1509	0.917469	0.231999	-2.56543	5.01317e-05	-1.64796	0.00131425	0.77748	0.112666	-0.139988	0.914146
Q7Z6E9	E3 ubiquitin-protein ligase RBBP6	RBBP6	SSTLVDYTSTSSTGGSPVRKSEEKTDTKRTV	1277	0.0778132	0.794015	1.37473	2.17993e-06	1.45254	2.72824e-06	-0.217126	0.200824	-0.294939	0.165682
Q7Z6Z7	E3 ubiquitin-protein ligase HUWE1	HUWE1	EYNLEQQRRAQCETLSPDGLPEEQPQTTKLK	3662	0.84328	0.00531742	-1.89938	1.51882e-07	-1.0561	1.37094e-05	0.491821	0.00868457	-0.351459	0.0733253
Q7Z6Z7	E3 ubiquitin-protein ligase HUWE1	HUWE1	CIRIALPAPRGSGTASDDEFENLRIKGPNAV	1907	-0.182639	0.241849	0.891233	1.0467e-06	0.708594	8.88191e-06	-0.14182	0.152467	0.040819	0.861576
Q7Z6Z7	E3 ubiquitin-protein ligase HUWE1	HUWE1	RSDGSGESAQPPEDSSPPASSESSSTRDSAV	2918	0.578494	0.173213	-1.20447	0.000161667	-0.625977	0.011113	0.345573	0.196557	-0.232921	0.562118
Q7Z6Z7	E3 ubiquitin-protein ligase HUWE1	HUWE1	ESQEDVLMDEAPSNLSQASTLQANREDSMNI	2391	0.971893	0.26693	-0.625412	0.156689	0.34648	0.431679	-0.346893	0.543018	-1.31879	0.0584493
Q7Z7K6	Centromere protein V	CENPV	SAAAALAPSATRTRRSASQAGSKSQAVEKPP	45	-0.170738	0.789329	-1.17521	0.001552	-1.34595	0.000764062	-0.256708	0.487235	-0.0859702	0.932318
Q86TC9	Myopalladin	MYPN	APSMPSQGLAKKNTKSPQPVNDDNIRETKNA	867	0.0776301	0.920785	-1.70876	0.000327498	-1.63113	0.000547251	-0.0935306	0.83324	-0.171161	0.863825
Q86U42	Polyadenylate-binding protein 2	PABPN1	AAAAAAAAGAAGGRGSGPGRRRHLVPGAGGE	19	-0.322744	0.746389	-0.346681	0.436377	-0.669425	0.153001	-0.730598	0.204579	-0.407854	0.678062
Q86U42	Polyadenylate-binding protein 2	PABPN1	KLKELQNEVEKQMNMSPPPGNAGPVIMSIEE	150	0.726422	0.00825916	-0.920525	1.61777e-05	-0.194102	0.113491	0.556143	0.0031929	-0.17028	0.40086
Q86U70	LIM domain-binding protein 1	LDB1	EPTRQQPSKRRKRKMSGGSTMSSGGGNTNNS	302	0.123799	0.652894	1.40121	1.70616e-06	1.52501	1.88252e-06	-0.0811694	0.642829	-0.204969	0.357236
Q86U86	Protein polybromo-1	PBRM1	QQERERAAQQQQPSASPRAGTPVGALMGVVP	1453	-0.431911	0.0740199	0.747027	7.03717e-05	0.315116	0.0175194	-0.238006	0.111315	0.193905	0.314462
Q86U90	YrdC domain-containing protein, mitochondrial	YRDC	ARLLRLPGSGAVQAASPERAGWTEALRAAVA	60	0.567427	0.175882	-2.23761	1.58704e-06	-1.67018	1.99563e-05	0.437209	0.103376	-0.130219	0.814459
Q86UE4	Protein LYRIC	MTDH	GGGWNEKSVKLSSQISAGEEKWNSVSPASAG	298	-0.133367	0.826992	1.60498	0.000129078	1.47162	0.000298398	-0.891626	0.0204267	-0.758259	0.0769295
Q86UE4	Protein LYRIC	MTDH	PAAAPDDLALLKNLRSEEQKKKNRKKLSEKP	111	0.42408	0.508026	-2.31914	2.40255e-05	-1.89506	0.000143095	0.14799	0.718137	-0.27609	0.687369
Q86UE8	Serine/threonine-protein kinase tousled-like 2	TLK2	DPYLLPHIRKSVSTSSPAGAAIASTSGASNN	753	0.410762	0.298308	-2.35642	7.62194e-07	-1.94566	4.94985e-06	0.519129	0.0476423	0.108368	0.849239
Q86UK0	ATP-binding cassette sub-family A member 12	ABCA12	AYLNSLNNFLLRVNMSKYDAARHGIIMYSHP	1954	0.639353	0.0805381	-2.71434	1.45447e-07	-2.07498	1.72618e-06	0.217413	0.332048	-0.42194	0.133684
Q86UP2	Kinectin	KTN1	KKNKKKEIQNGNLHESDSESVPRDFKLSDAL	75	-0.431029	0.211896	1.13973	5.35179e-05	0.708696	0.00168781	-0.27812	0.200824	0.152909	0.682637
Q86UP2	Kinectin	KTN1	QEALPLHQETKQESGSGKKKASSKKQKTENV	206	1.72482	0.000449797	-4.47202	5.13988e-09	-2.7472	2.16768e-07	1.83319	1.22283e-05	0.108371	0.788801
Q86UU0	B-cell CLL/lymphoma 9-like protein	BCL9L	KGVGAGNHGAKANQISPSNSSLKNPQAGVPP	88	0.737035	0.0205539	-0.698261	0.000540411	0.0387746	0.791598	0.75834	0.00192462	0.0213046	0.962023
Q86UU0	B-cell CLL/lymphoma 9-like protein	BCL9L	VPSPGWVASPKTAMPSPGVSQNKQPPLNMNS	1017	0.0715359	0.83751	-1.01029	5.95401e-05	-0.938754	0.000137174	0.228001	0.239235	0.156466	0.621247
Q86UU1	Pleckstrin homology-like domain family B member 1	PHLDB1	TFSDGLATRTLQPPESPRLGRRGLDSMRELP	443	0.0697749	0.850462	-0.20869	0.196867	-0.138915	0.394249	-0.16273	0.432787	-0.232505	0.402347
Q86UW9	Probable E3 ubiquitin-protein ligase DTX2	DTX2	AIGLPVCLSRAPQPTSPPASRLASKSHGSVK	360	0.383402	0.0708082	-0.34359	0.00513982	0.0398118	0.698831	0.288738	0.0369867	-0.0946633	0.664311
Q86V15	Zinc finger protein castor homolog 1	CASZ1	VVVEKRADAGSHTEGSPSQPRDQERSGPESG	57	0.0929248	0.83751	0.0856658	0.662249	0.178591	0.377114	-0.167632	0.518527	-0.260557	0.467386
Q86V48	Leucine zipper protein 1	LUZP1	LEQNKKMNRDYTRNASNLERNDLRIEDGISS	233	-1.04455	0.0130832	-0.498051	0.017133	-1.5426	1.58381e-05	-0.886957	0.00308613	0.157591	0.708139
Q86V48	Leucine zipper protein 1	LUZP1	NKVTSSITIYPSDSSSPRAAPGEALRERHTS	805	0.170156	0.799495	-2.67342	6.35167e-06	-2.50326	1.56136e-05	0.456944	0.230296	0.286788	0.654036
Q86VM9	Zinc finger CCCH domain-containing protein 18	ZC3H18	KKEDGVKEEKRKRDSSTQPPKSAKPPAGGKS	775	-0.728274	0.0119436	-0.0912107	0.466862	-0.819485	9.5936e-05	-0.322626	0.055398	0.405649	0.0471108
Q86VM9	Zinc finger CCCH domain-containing protein 18	ZC3H18	ESAARGPSQEEEDNHSDEEDRASEPKSQDQD	67	-0.302838	0.0539536	0.913257	6.68862e-07	0.610419	1.78513e-05	-0.11168	0.235634	0.191157	0.107979
Q86VM9	Zinc finger CCCH domain-containing protein 18	ZC3H18	DEEDRASEPKSQDQDSEVNELSRGPTSSPCE	83	-0.227915	0.389454	1.24182	3.69253e-06	1.0139	2.40621e-05	-0.184034	0.259685	0.0438807	0.921186
Q86VM9	Zinc finger CCCH domain-containing protein 18	ZC3H18	PDRGSRDRKSGGRLGSPKPERQRGQNSKAPA	868	-0.206305	0.303411	1.09491	1.40227e-06	0.888603	1.00845e-05	-0.226919	0.0805175	-0.0206137	0.959949
Q86VM9	Zinc finger CCCH domain-containing protein 18	ZC3H18	WRRSKSPKKKLGVSVSPSRARRRRKTSASSA	534	-0.223475	0.196631	1.27448	1.80274e-07	1.05101	1.35535e-06	-0.124866	0.247326	0.0986094	0.544104
Q86VM9	Zinc finger CCCH domain-containing protein 18	ZC3H18	NSKAPAAPADRKRQLSPQSKSSSKVTSVPGK	893	-0.234151	0.20268	1.24768	3.08008e-07	1.01353	2.35182e-06	-0.0652049	0.583144	0.168946	0.255987
Q86VM9	Zinc finger CCCH domain-containing protein 18	ZC3H18	DKDRQSPPPAKRPNTSPDRGSRDRKSGGRLG	852	-0.00679276	0.984762	1.34457	1.4576e-06	1.33777	2.79112e-06	-0.0205555	0.90195	-0.0137627	0.973615
Q86VM9	Zinc finger CCCH domain-containing protein 18	ZC3H18	REKEREKEKGKPKPRSPQPPSRQAEPPKKEA	487	-0.00811982	0.988528	1.05641	0.000541801	1.04829	0.000687197	-0.0509773	0.863107	-0.0428575	0.959949
Q86VM9	Zinc finger CCCH domain-containing protein 18	ZC3H18	KGSRKRYEPSDKDRQSPPPAKRPNTSPDRGS	842	-0.0415957	0.867873	0.997021	5.21877e-06	0.955425	1.13525e-05	-0.0828701	0.562082	-0.0412744	0.909575
Q86VS8	Protein Hook homolog 3	HOOK3	LMERLNQSDSIEDPNSPAGRRHLQLQTQLEQ	238	-0.450542	0.333574	-0.321004	0.168935	-0.771546	0.00600478	-0.285844	0.329592	0.164698	0.776799
Q86W50	Methyltransferase-like protein 16	METTL16	SSNGAQDQEASEQFGSPVAERGKRLPGVAGQ	498	1.39477	0.000355734	-1.84457	9.30124e-08	-0.449797	0.00189431	1.46685	6.05284e-06	0.0720781	0.804428
Q86W92	Liprin-beta-1	PPFIBP1	GEEYVCPMELGQASGSASKKGFKPGLDMRLY	936	1.40907	0.0430517	-4.0854	6.06891e-07	-2.67633	1.8303e-05	0.98777	0.0290503	-0.421297	0.480574
Q86W92	Liprin-beta-1	PPFIBP1	QLCDKLLTSSLQKSSSLGNLKKETSDGEKET	466	-0.477856	0.0649635	0.713773	0.000158883	0.235917	0.0741587	-0.189259	0.229531	0.288597	0.14427
Q86WB0	Nuclear-interacting partner of ALK	ZC3HC1	VDAKDTSATSQSVNGSPQAEQPSLESTSKEA	62	-0.690136	0.0319067	1.19849	1.46503e-05	0.508357	0.00566855	0.66804	0.00455791	1.35818	0.000148657
Q86WB0	Nuclear-interacting partner of ALK	ZC3HC1	SPLRKAKRARLCSSSSSDTSSRSFFDPTSQH	410	-0.245132	0.584611	1.01332	0.000723147	0.768192	0.00463415	0.0699591	0.813771	0.315091	0.405364
Q86WB0	Nuclear-interacting partner of ALK	ZC3HC1	PGLEGRPERLPLVPESPRRMMTRSQDATFSP	321	-1.04461	0.0269707	1.35315	8.82822e-05	0.308533	0.16817	-0.535058	0.0606142	0.509557	0.140101
Q86WB0	Nuclear-interacting partner of ALK	ZC3HC1	ESPRRMMTRSQDATFSPGSEQAEKSPGPIVS	335	-0.609139	0.220331	2.75945	1.24279e-06	2.15031	1.16916e-05	-0.643783	0.0497016	-0.0346445	0.9634
Q86WC4	Osteopetrosis-associated transmembrane protein 1	OSTM1	KKRKLILPKRLKSSTSFANIQENSN______	325	-0.280608	0.522912	1.4809	4.10291e-05	1.20029	0.0002439	-0.309248	0.252339	-0.0286395	0.96524
Q86WR0	Coiled-coil domain-containing protein 25	CCDC25	LMKVENMSSNQDGNDSDEFM___________	204	-0.283632	0.450678	1.17195	7.8968e-05	0.888318	0.000670101	-0.249395	0.288205	0.0342364	0.959949
Q86X27	Ras-specific guanine nucleotide-releasing factor RalGPS2	RALGPS2	SAASREDLVGPEVGASPQSGRKSVAAEGALL	308	0.180896	0.521902	-0.33415	0.0272698	-0.153254	0.275104	0.246357	0.159464	0.0654607	0.875655
Q86XL3	Ankyrin repeat and LEM domain-containing protein 2	ANKLE2	SLEEIKNRQNAARNNSPPTVGAFGHTRCSAF	662	0.156995	0.566799	-1.06624	1.52998e-05	-0.909243	6.83899e-05	-0.0533116	0.764452	-0.210307	0.355772
Q86Y91	Kinesin-like protein KIF18B	KIF18B	VYEGGGQPPPQDLPGSPKSGPPPEHQPCTPE	404	0.277099	0.390706	0.609976	0.00227637	0.887075	0.000236809	0.107362	0.607159	-0.169737	0.583683
Q86YP4	Transcriptional repressor p66-alpha	GATAD2A	NSTPTSVASVVTSAESPASRQAAAKLALRKQ	340	-0.100728	0.670533	1.24239	1.32146e-06	1.14166	4.12631e-06	0.231298	0.108839	0.332026	0.0629409
Q86YS7	C2 domain-containing protein 5	C2CD5	DTDLSLTPKTGMGSGSAGKEGGPFKALLRQQ	323	-0.603144	0.00858435	1.53674	1.38869e-07	0.933595	6.69479e-06	-0.417577	0.00584938	0.185567	0.248022
Q86Z02	Homeodomain-interacting protein kinase 1	HIPK1	PLNLSQNQQSSAAPTSQERSSNPAPRRQQAF	1058	-0.0144795	0.990198	-2.01175	0.00247683	-2.02623	0.00271759	0.154133	0.828644	0.168613	0.927305
Q8IU60	m7GpppN-mRNA hydrolase	DCP2	KNQSMRGNGRKQYQDSPNQKKRTNGLQPAKQ	329	0.195505	0.23296	-1.20809	1.8398e-07	-1.01259	1.31685e-06	0.361272	0.00457433	0.165767	0.208868
Q8IU81	Interferon regulatory factor 2-binding protein 1	IRF2BP1	KDPGGGGGPVRAGGASPAASSTAQPPTQHRL	453	-0.230116	0.179984	0.514764	0.00010912	0.284647	0.00594245	-0.434497	0.0021692	-0.204381	0.132312
Q8IU81	Interferon regulatory factor 2-binding protein 1	IRF2BP1	APSRNLAPTPRRRKASPEPEGEAAGKMTTEE	384	0.0272209	0.977489	0.133385	0.699774	0.160606	0.649756	-0.0782314	0.869968	-0.105452	0.932318
Q8IUD2	ELKS/Rab6-interacting/CAST family member 1	ERC1	PRLPRSPRLGHRRTNSTGGSSGSSVGGGSGK	37	0.168974	0.419527	0.148211	0.156868	0.317184	0.00944707	0.190509	0.147758	0.0215353	0.959949
Q8IUD2	ELKS/Rab6-interacting/CAST family member 1	ERC1	YGSARSVGKVEPSSQSPGRSPRLPRSPRLGH	17	0.520849	0.339559	2.56742	3.88505e-06	3.08827	1.99664e-06	0.319165	0.354167	-0.201684	0.757119
Q8IUD2	ELKS/Rab6-interacting/CAST family member 1	ERC1	RSVGKVEPSSQSPGRSPRLPRSPRLGHRRTN	21	0.639858	0.282333	1.49633	0.000392982	2.13619	4.35058e-05	-0.121493	0.75482	-0.76135	0.107381
Q8IV31	Transmembrane protein 139	TMEM139	LEWGLRSQLQSMQTESPGPSGNARDNEAFEV	74	0.595906	0.356283	-1.74204	0.00022302	-1.14614	0.00393597	0.204332	0.626927	-0.391574	0.504294
Q8IY33	Inactive serine/threonine-protein kinase VRK3;MICAL-like protein 2	VRK3;MICALL2	KSPQVTRGSPQKTSCSPQKTRQSPQTLKRSR;PRQPGAMGVDSRTSCSPQKAQEANKARPSAW	272	-0.0121551	0.96563	0.484015	0.000729453	0.47186	0.00102176	0.668215	0.000569228	0.68037	0.00106444
Q8IVT2	Mitotic interactor and substrate of PLK1	MISP	HKNAMAERWESRIYASEEDD___________	675	-0.303473	0.187922	0.718435	8.15355e-05	0.414961	0.0037003	-0.383194	0.0187312	-0.079721	0.781504
Q8IVT2	Mitotic interactor and substrate of PLK1	MISP	WGWEVAGAPALRLQKSQSSDLLERERESVLR	541	1.3558	0.0116546	-1.25481	0.000274083	0.100992	0.67127	-0.353435	0.235153	-1.70923	0.000588087
Q8IVT2	Mitotic interactor and substrate of PLK1	MISP	EVAEERRNALFPEVFSPTPDENSDQNSRSSS	575	0.422943	0.575271	-1.56035	0.00129834	-1.13741	0.00936645	0.113675	0.819696	-0.309268	0.714089
Q8IW35	Centrosomal protein of 97 kDa	CEP97	ILSKQRFHQRQLMNQSQNEELSPLVPVETRA	308	0.359462	0.518193	0.258981	0.334107	0.618443	0.0375251	-1.88605	0.000313712	-2.24551	0.000248537
Q8IW50	Protein FAM219A	FAM219A	RELARKGSLKNGSMGSPVNQQPKKNNVMART	72	-0.0221064	0.974013	-0.716238	0.00817176	-0.738344	0.00762458	0.775695	0.0187842	0.797801	0.0336064
Q8IWC1	MAP7 domain-containing protein 3	MAP7D3	QKNCPPSPLPLISKQSPQTSFPYKIMPIQHT	533	0.572016	0.237841	-2.96906	6.34563e-07	-2.39705	4.78377e-06	0.723393	0.028968	0.151377	0.813483
Q8IWD4	Coiled-coil domain-containing protein 117	CCDC117	GAELAPRPGPRAVPSSPAGSAARGRVSVHCK	53	0.19516	0.599218	-1.1584	7.41445e-05	-0.963241	0.000346115	0.354941	0.126275	0.159781	0.689071
Q8IWI9	MAX gene-associated protein	MGA	PTLAPVVAKLGNSGASPSSAGK_________	3059	-0.132053	0.387858	0.128731	0.0960021	-0.00332246	0.966543	1.27917	1.67729e-06	1.41122	1.61464e-06
Q8IWI9	MAX gene-associated protein	MGA	KIATAAKVVNANQNASPNVPGKRGRPRKLKL	607	-0.0875322	0.884339	-0.0633923	0.807963	-0.150924	0.569755	0.563395	0.0961599	0.650927	0.117871
Q8IWW6	Rho GTPase-activating protein 12	ARHGAP12	LDLTHNNGKFNNDSHSPKVSSQNRTRSFGHF	165	0.144237	0.86414	-1.46553	0.00179284	-1.32129	0.00384119	0.487803	0.292071	0.343566	0.659986
Q8IWZ3	Ankyrin repeat and KH domain-containing protein 1	ANKHD1	INGEPRGGGAGGNSDSDNLDSTDCNSESSSG	1593	-0.212094	0.329747	1.42442	3.97003e-07	1.21233	2.22803e-06	0.12482	0.364034	0.336915	0.0511723
Q8IX03	Protein KIBRA	WWC1	PGPQSQYVCRLNRSDSDSSTLSKKPPFVRNS	947	0.189664	0.817386	0.282368	0.43326	0.472032	0.208198	-0.193083	0.690429	-0.382747	0.60406
Q8IX12	Cell division cycle and apoptosis regulator protein 1	CCAR1	ERDDETDEPKPKRRKSGDDKDKKEDRDERKK	832	-0.269081	0.288183	0.437358	0.00433785	0.168277	0.193332	-0.279545	0.0871465	-0.010464	0.979244
Q8IXQ3	Uncharacterized protein C9orf40	C9orf40	RKRKIDAGTMAEPSASPSKRRDSGDNSAPSG	69	-0.647323	0.0249926	0.398747	0.00963026	-0.248576	0.0775248	-0.414921	0.0248098	0.232402	0.291014
Q8IXQ3	Uncharacterized protein C9orf40	C9orf40	GTMAEPSASPSKRRDSGDNSAPSGQEREDHG	76	0.231855	0.826992	-0.357784	0.44139	-0.125928	0.792011	-0.481686	0.429894	-0.713541	0.376243
Q8IY81	pre-rRNA processing protein FTSJ3	FTSJ3	VIASSKKAKRDLIDNSFNRYTFNEDEGELPE	688	2.57113	0.135581	-2.82703	0.00535034	-0.255901	0.763771	-0.721226	0.512258	-3.29235	0.0182769
Q8IYB1	Protein MB21D2	MB21D2	LTLELQRRGSTTSIPSPQSDGGDPNQPDDRL	439	0.95611	0.270116	-1.91598	0.000935928	-0.959872	0.0415047	1.33878	0.0256238	0.382673	0.68607
Q8IYB3	Serine/arginine repetitive matrix protein 1	SRRM1	KRHSPSPRPRAPQTSSSPPPVRRGASSSPQR	695	0.236644	0.549448	0.617332	0.00726678	0.853976	0.00120057	-0.0875656	0.732108	-0.32421	0.315947
Q8IYB3	Serine/arginine repetitive matrix protein 1	SRRM1	RHSPSPRPRAPQTSSSPPPVRRGASSSPQRR	696	-0.314271	0.2711	1.0431	2.63163e-05	0.728828	0.000430661	-0.444529	0.0247876	-0.130258	0.670278
Q8IYB3	Serine/arginine repetitive matrix protein 1	SRRM1	HLREKALRSMRKAQVSPQS____________	901	0.0805683	0.754934	1.10725	4.29095e-06	1.18781	4.47595e-06	-0.0158771	0.922031	-0.0964453	0.726681
Q8IYB3	Serine/arginine repetitive matrix protein 1	SRRM1	HRKGSSPSRSTREARSPQPNKRHSPSPRPRA	675	-0.206533	0.460796	1.18612	8.2989e-06	0.979587	4.86973e-05	-0.282452	0.111612	-0.0759191	0.849239
Q8IYB3	Serine/arginine repetitive matrix protein 1	SRRM1	KRRSPSLSSKHRKGSSPSRSTREARSPQPNK	665	-0.0349631	0.946487	1.28852	0.000113872	1.25355	0.000181007	-0.161853	0.563797	-0.12689	0.833068
Q8IYB3	Serine/arginine repetitive matrix protein 1	SRRM1	TPQQSNRTRKSRVSVSPGRTSGKVTKHKGTE	431	-0.462799	0.241849	1.31736	5.27329e-05	0.854562	0.00129007	-0.347055	0.166441	0.115744	0.833098
Q8IYB3	Serine/arginine repetitive matrix protein 1	SRRM1	SESEEDKGGKMAAADSVQQRRQYRRQNQQSS	478	0.902043	0.449498	-3.48646	0.000125353	-2.58442	0.0011622	0.983536	0.188153	0.0814932	0.96365
Q8IYB3	Serine/arginine repetitive matrix protein 1	SRRM1	PPKRRVSHSPPPKQRSSPVTKRRSPSLSSKH	645	0.122414	0.755538	1.00325	0.000196343	1.12566	0.000115975	-0.119459	0.615914	-0.241873	0.449448
Q8IYB3	Serine/arginine repetitive matrix protein 1	SRRM1	PQSVRRVSSSRSVSGSPEPAAKKPPAPPSPV	756	-0.151092	0.699541	0.346437	0.0732609	0.195345	0.297158	-0.421042	0.0800782	-0.269949	0.396446
Q8IYB3	Serine/arginine repetitive matrix protein 1	SRRM1	HRPSPPATPPPKTRHSPTPQQSNRTRKSRVS	414	-0.147608	0.858992	1.71829	0.00055057	1.57068	0.00118731	-0.271604	0.562082	-0.123997	0.919035
Q8IYB7	DIS3-like exonuclease 2	DIS3L2	PGTQGHLGPEKEEEESDGEPEDSSTS_____	875	-0.433394	0.227228	0.924418	0.0003327	0.491024	0.0164036	-0.267149	0.235759	0.166244	0.663581
Q8IZL8	Proline-, glutamic acid- and leucine-rich protein 1	PELP1	ISPPADALKLRSPRGSPDGSLQTGKPSAPKK	481	-0.0802265	0.76625	-0.0656926	0.585569	-0.145919	0.243084	-0.0130001	0.938887	0.0672265	0.849239
Q8IZP0	Abl interactor 1	ABI1	PNDYMTSPARLGSQHSPGRTASLNQRPRTHS	225	0.190172	0.382262	0.120253	0.257778	0.310426	0.0124341	0.336852	0.023804	0.14668	0.436603
Q8IZT6	Abnormal spindle-like microcephaly-associated protein	ASPM	KKKKISASTSHNRRVSNIQNVNKTFSVSQKV	170	0.472883	0.499033	-1.51936	0.000926774	-1.04648	0.0095935	-0.210205	0.642888	-0.683088	0.216914
Q8IZW8	Tensin-4	TNS4	QRELGGADGASDSTDSPASCQKKSAGCHTLY	571	1.52892	0.00816108	-3.44042	2.73152e-07	-1.9115	2.54325e-05	0.0786602	0.813707	-1.45026	0.00203095
Q8N108	Mesoderm induction early response protein 1	MIER1	RLLDESESAASSRAPSPPPTASNSSNSQSEK	377	-0.038385	0.920785	1.3839	9.26383e-06	1.34552	1.68904e-05	-0.165045	0.432787	-0.12666	0.745757
Q8N122	Regulatory-associated protein of mTOR	RPTOR	QRVLDTSSLTQSAPASPTNKGVHIHQAGGSP	863	-0.144995	0.748007	1.42012	4.25946e-05	1.27512	0.000126879	0.267509	0.305641	0.412504	0.217458
Q8N163	Cell cycle and apoptosis regulator protein 2	CCAR2	FAGAKLEDSEVRSVASNQSEMEFSSLQDMPK	678	0.114535	0.889387	1.69886	0.000583768	1.8134	0.000457751	0.255157	0.583144	0.140622	0.903602
Q8N1F7	Nuclear pore complex protein Nup93	NUP93	TMNILFTQFKRLKGTSPSSSSRPQRVIEDRD	767	0.114812	0.611942	-0.589017	0.000257834	-0.474205	0.00131472	0.00840651	0.955585	-0.106405	0.645827
Q8N1F8	Serine/threonine-protein kinase 11-interacting protein	STK11IP	CHPPGHGDHLDRAKNSPPQAPSTRDHGSWSL	761	-0.149555	0.373948	0.980868	8.04468e-07	0.831313	4.45975e-06	-0.231756	0.0380184	-0.082201	0.634572
Q8N1F8	Serine/threonine-protein kinase 11-interacting protein	STK11IP	PRPSPPQEEARGPQESPQKMSEEVRAEPQEE	482	0.0569107	0.794015	0.686514	3.62798e-05	0.743425	2.95756e-05	-0.0517277	0.690316	-0.108638	0.560513
Q8N1G0	Zinc finger protein 687	ZNF687	EKHVQVRHGLQLGAQSPGRGTTLARGSSARA	1057	-0.129557	0.414748	0.939999	7.48639e-07	0.810442	3.66092e-06	-0.0939002	0.34552	0.0356563	0.87967
Q8N201	Integrator complex subunit 1	INTS1	SLPPRRDSTEAPKPKSSPEQPIGQGRIRVGT	1326	0.391645	0.0392754	-0.400213	0.0008938	-0.00856841	0.925991	0.455825	0.00217958	0.0641801	0.775453
Q8N4C8	Misshapen-like kinase 1	MINK1	VVQPSHSPTENSKGQSPPSKDGSGDYQSRGL	927	1.2976	0.000355734	-1.79618	6.85935e-08	-0.498582	0.000615551	1.2825	7.97778e-06	-0.0150955	0.962023
Q8N4C8	Misshapen-like kinase 1	MINK1	AREVEERTRMNKQQNSPLAKSKPGSTGPEPP	535	1.3388	0.109817	-3.92432	3.70546e-06	-2.58552	0.000109874	1.53116	0.0113571	0.192362	0.876144
Q8N556	Actin filament-associated protein 1	AFAP1	NSAAVLKKSQAAPGSSPCRGHVLRKAKEWEL	711	0.598655	0.0873582	-0.452866	0.0172759	0.14579	0.394311	0.684806	0.00772908	0.0861509	0.865428
Q8N556	Actin filament-associated protein 1	AFAP1	QPKKADPAAVVKRTGSNAAQYKYGKNRVEAD	548	0.0842525	0.657687	0.75154	1.09581e-05	0.835792	8.32804e-06	-0.288451	0.0233744	-0.372703	0.0139357
Q8N556	Actin filament-associated protein 1	AFAP1	LGLAIEPKSGTSSPQSPVFRHRTLENSPISS	668	-0.474375	0.507456	2.73004	1.63478e-05	2.25567	9.27021e-05	-0.259331	0.567904	0.215044	0.819157
Q8N5F7	NF-kappa-B-activating protein	NKAP	_______MAPVSGSRSPDREASGSGGRRRSS	9	-0.310043	0.548898	2.5099	3.00333e-06	2.19985	1.22361e-05	0.262942	0.422334	0.572985	0.157673
Q8N5I9	Uncharacterized protein C12orf45	C12orf45	_MEVHGKPKASPSCSSPTRDSSGVPVSKELL	15	-0.0511942	0.918305	1.35796	6.56958e-05	1.30677	0.000117691	0.0368791	0.897362	0.0880734	0.895009
Q8N5I9	Uncharacterized protein C12orf45	C12orf45	GSDGRGGIWDRLLINSQPKSRKTSTLQTVRI	48	-0.258525	0.779799	-1.26253	0.00890847	-1.52106	0.00350488	-0.448915	0.396829	-0.19039	0.87967
Q8N5P1	Zinc finger CCCH domain-containing protein 8	ZC3H8	GPGNKGSNALLRNSGSQEEDGKPKEKQQHLS	165	-0.37496	0.155405	0.664937	0.000360858	0.289978	0.0412421	-0.476924	0.0126831	-0.101964	0.743566
Q8N684	Cleavage and polyadenylation specificity factor subunit 7	CPSF7	RSSSTEPPPPVRQEPSPKPNNKTPAILYTYS	60	0.248404	0.41381	-0.195891	0.191671	0.0525128	0.726259	0.175383	0.356787	-0.073021	0.871292
Q8N684	Cleavage and polyadenylation specificity factor subunit 7	CPSF7	DVLTATSQPSDDRSSSTEPPPPVRQEPSPKP	48	-0.164627	0.522912	0.950551	2.11499e-05	0.785924	0.00011623	-0.142642	0.374239	0.0219841	0.960941
Q8N684	Cleavage and polyadenylation specificity factor subunit 7	CPSF7	DCLHGIEAKSYSVGASGSSSRKRHRSRERSP	413	1.06742	0.00858435	-3.49297	2.8935e-08	-2.42555	6.97848e-07	0.830663	0.00309668	-0.236758	0.442593
Q8N684	Cleavage and polyadenylation specificity factor subunit 7	CPSF7	HGIEAKSYSVGASGSSSRKRHRSRERSPSRS	416	0.273057	0.563426	-2.29761	2.94668e-06	-2.02456	1.16576e-05	-0.0347859	0.912736	-0.307843	0.456783
Q8N6Q8	Methyltransferase-like protein 25	METTL25	NKVKNKADTEEVFNNSPTNQEKMPTSAILPD	265	0.360649	0.226231	-2.29908	1.4047e-07	-1.93843	9.83305e-07	0.498658	0.0187312	0.138009	0.663581
Q8N6T7	NAD-dependent protein deacetylase sirtuin-6	SIRT6	PLPRPPTPKLEPKEESPTRINGSIPAGPKQE	303	0.0564627	0.761706	0.258465	0.00906995	0.314927	0.00335962	-0.00278878	0.980733	-0.0592515	0.781504
Q8N8A6	ATP-dependent RNA helicase DDX51	DDX51	RRPRRRRRVNDAEPGSPEAPQGKRRKADGED	83	0.196493	0.625905	0.907596	0.000670807	1.10409	0.000222314	0.0776363	0.762962	-0.118856	0.821741
Q8N8S7	Protein enabled homolog	ENAH	KGEDSEPVTSKASSTSTPEPTRKPWERTNTM	488	0.663314	0.212212	-2.8637	1.48629e-06	-2.20038	1.53906e-05	0.78343	0.0301688	0.120115	0.87967
Q8N8S7	Protein enabled homolog	ENAH	VLNSQETGPTLPRQNSQLPAQVQNGPSQEEL	125	0.595694	0.412957	0.85236	0.0292514	1.44805	0.00195092	-0.419354	0.357059	-1.01505	0.0724026
Q8N9T8	Protein KRI1 homolog	KRI1	EQKQLKESFRAFVEDSEDEDGAGEGGSSLLQ	171	-0.130721	0.669716	1.34248	4.66086e-06	1.21175	1.52963e-05	-0.00780764	0.970958	0.122914	0.708139
Q8N9T8	Protein KRI1 homolog	KRI1	KVILEKAGKYVDEENSDGETSNHRLQETSSQ	136	-0.116633	0.791853	0.846587	0.00119456	0.729954	0.00343051	-0.304212	0.22523	-0.187579	0.657563
Q8NB49	Phospholipid-transporting ATPase IG	ATP11C	LSARPSVRPLLLRTFSDESNVL_________	1126	0.489574	0.401692	0.284866	0.315001	0.774441	0.017628	0.137424	0.715475	-0.35215	0.504294
Q8NC51	Plasminogen activator inhibitor 1 RNA-binding protein	SERBP1	GDGFDSRGKREFDRHSGSDRSSFSHYSGLKH	197	0.486696	0.0637579	-0.965419	1.87789e-05	-0.478723	0.00283872	-0.0441756	0.795253	-0.530871	0.0123486
Q8NC51	Plasminogen activator inhibitor 1 RNA-binding protein	SERBP1	GPGAKSAAQAAAQTNSNAAGKQLRKESQKDR	63	0.146891	0.760046	-1.93994	6.63069e-06	-1.79305	1.78927e-05	-0.0364461	0.902022	-0.183337	0.714932
Q8NCD3	Holliday junction recognition protein	HJURP	LPDSWAMNMYRGGPASPGGLQGLETRRLSLP	473	0.0413446	0.880347	0.532642	0.000940313	0.573987	0.000685908	-0.0358874	0.825441	-0.0772321	0.807167
Q8ND56	Protein LSM14 homolog A	LSM14A	TASAHLPAPAAVGRRSPVSTRPLPSASQKAG	216	-0.195871	0.307613	0.948674	2.81924e-06	0.752803	2.26395e-05	-0.281113	0.0310017	-0.0852419	0.682637
Q8ND56	Protein LSM14 homolog A	LSM14A	TQDTRSLKTQLSQGRSSPQLDPLRKSPTMEQ	182	-0.370089	0.133527	1.12818	4.42855e-06	0.758091	0.000113589	-0.156806	0.304623	0.213283	0.286373
Q8ND56	Protein LSM14 homolog A	LSM14A	GSAFTQDTRSLKTQLSQGRSSPQLDPLRKSP	178	0.153685	0.651136	1.73778	1.62214e-06	1.89147	1.82502e-06	-0.568412	0.0151697	-0.722097	0.00933999
Q8ND76	Cyclin-Y	CCNY	DKYKDLRRSARKRSASADNLTLPRWSPAIIS	326	-0.668365	0.0124136	1.62849	2.95228e-07	0.960125	1.81744e-05	-0.0685919	0.661551	0.599773	0.00441804
Q8NDF8	Non-canonical poly(A) RNA polymerase PAPD5	PAPD5	AVGKMQSTQTTNTSNSTNKSQHGSARLFRSS	509	1.53582	0.0939423	-4.22534	3.88538e-06	-2.68953	0.000145609	1.08402	0.0628252	-0.451794	0.621933
Q8NDI1	EH domain-binding protein 1	EHBP1	LKLKKLLEVQPQVANSPSSAAQKAVTESSEQ	964	1.04807	0.505661	-3.62108	0.000621394	-2.57301	0.00590881	1.54368	0.117245	0.495609	0.806386
Q8NDI1	EH domain-binding protein 1	EHBP1	FSQYIENRPEMKRQRSIQEDTKKGNEEKAAI	1035	-0.0484614	0.821363	0.736964	1.85976e-05	0.688503	4.42334e-05	-0.156608	0.198466	-0.108146	0.551716
Q8NDT2	Putative RNA-binding protein 15B	RBM15B	NHSSEGTKESSSNSLSNSRHGAEERGHHHHH	654	1.58687	0.0970639	-3.82938	1.15591e-05	-2.24251	0.000653179	1.46068	0.0244327	-0.126193	0.944905
Q8NDX5	Polyhomeotic-like protein 3	PHC3	NKTTVTSSKISQRDPSPESNKKGESPSLESR	263	-0.138322	0.635959	1.10043	1.56392e-05	0.962107	5.95814e-05	-0.13082	0.468171	0.00750255	0.986441
Q8NE01	Metal transporter CNNM3	CNNM3	YLNALLATRAQNLPQSPENTDLQVIPGSQTR	661	1.22774	0.309759	-2.97899	0.000440574	-1.75125	0.0122753	1.26523	0.102484	0.0374962	0.984541
Q8NE71	ATP-binding cassette sub-family F member 1	ABCF1	PPKQGKEKAKKAEQGSEEEGEGEEEEEEGGE	228	0.515473	0.265574	0.179054	0.429639	0.694527	0.0103939	-0.174885	0.562082	-0.690357	0.061186
Q8NE71	ATP-binding cassette sub-family F member 1	ABCF1	EKELMERLKKLSVPTSDEEDEVPAPKPRGGK	109	0.0834693	0.802987	0.737012	0.000466877	0.820482	0.000278283	0.129973	0.504586	0.0465037	0.929942
Q8NE71	ATP-binding cassette sub-family F member 1	ABCF1	QQPPEPEWIGDGESTSPSDKVVKKGKKDKKI	22	0.348215	0.468312	-0.860817	0.00331591	-0.512602	0.0463125	0.467325	0.123297	0.11911	0.865428
Q8NEM2	SHC SH2 domain-binding protein 1	SHCBP1	YRKFLNLRSSLSNCNSDSEQENISMVEGLKL	273	-0.0742056	0.858992	0.97222	0.000255989	0.898014	0.000536306	0.0802385	0.73555	0.154444	0.708139
Q8NEY8	Periphilin-1	PPHLN1	RERSPYKRDNTFFRESPVGRKDSPHSRSGSS	133	-0.32549	0.0544693	0.518994	6.80992e-05	0.193504	0.0300466	-0.358903	0.00444721	-0.0334136	0.89605
Q8NEY8	Periphilin-1	PPHLN1	DKERPVQSLKTSRDTSPSSGSAVSSSKVLDK	205	-0.399882	0.15906	1.61517	1.01985e-06	1.21529	1.22361e-05	-0.546704	0.00936453	-0.146823	0.604455
Q8NFC6	Biorientation of chromosomes in cell division protein 1-like 1	BOD1L1	KDDSKTDTGIVTVEQSPSSSKLKVMQTDESN	2905	0.0290079	0.940988	0.594484	0.00308793	0.623492	0.00265747	0.0617214	0.774214	0.0327135	0.959949
Q8NHG8	E3 ubiquitin-protein ligase ZNRF2	ZNRF2	SPEDGGGGRDRPVGGSPGGPRLVIGSLPAHL	135	0.181195	0.461216	-0.108806	0.364491	0.0723888	0.557535	0.0042502	0.980201	-0.176945	0.397495
Q8NHV4	Protein NEDD1	NEDD1	AKLVTSGAESGNLNTSPSSNQTRNSEKFEKP	516	0.200125	0.74711	-1.00627	0.00371086	-0.806143	0.0135934	1.30511	0.00364892	1.10499	0.0178901
Q8NI27	THO complex subunit 2	THOC2	EKKDEKDRKERKRDHSNNDREVPPDLTKRRK	1486	-0.189908	0.333259	-0.232143	0.0291889	-0.42205	0.00127907	-0.0554682	0.667305	0.134439	0.432456
Q8TAD8	Smad nuclear-interacting protein 1	SNIP1	REHRQRNDVGGGGSESQELVPRPGGNNKEKE	202	-0.21549	0.547824	0.443389	0.0231762	0.227899	0.207042	0.102007	0.662228	0.317497	0.274622
Q8TAD8	Smad nuclear-interacting protein 1	SNIP1	EVAPPAHRRPDHSGGSPSPPTSEPARSGHRG	52	-0.302346	0.785611	2.32336	0.000698487	2.02101	0.00200181	-0.0930014	0.891086	0.209344	0.895009
Q8TAD8	Smad nuclear-interacting protein 1	SNIP1	SDRDRHRGHSHQRRTSNERPGSGQGQGRDRD	153	-0.119212	0.623513	0.96912	1.10679e-05	0.849908	4.15329e-05	0.151518	0.305789	0.27073	0.146527
Q8TAQ2	SWI/SNF complex subunit SMARCC2	SMARCC2	RRKKISAKTLTDEVNSPDSDRRDKKGGNYKK	283	1.15655	0.000479222	-1.40974	4.58008e-07	-0.253195	0.034629	1.16106	2.1103e-05	0.00451862	0.991687
Q8TB72	Pumilio homolog 2	PUM2	ADCKDFNRTPGSRQASPTEVVERLGPNTNPS	182	-0.0316812	0.889387	0.879541	6.42128e-06	0.84786	1.30706e-05	-0.0933997	0.466596	-0.0617185	0.816586
Q8TBN0	Guanine nucleotide exchange factor for Rab-3A	RAB3IL1	EVTALKTLVITSTPASPNRELHPQLLSPTKA	168	0.508046	0.554919	-0.613402	0.154311	-0.105357	0.805836	0.217127	0.698953	-0.290919	0.788054
Q8TC07	TBC1 domain family member 15	TBC1D15	SNALPTLSASGARNDSPTQIPVSSDVCRLTP	675	0.157592	0.715857	-1.45855	2.94489e-05	-1.30096	9.49653e-05	0.21152	0.415843	0.0539285	0.945365
Q8TCJ2	Dolichyl-diphosphooligosaccharide--protein glycosyltransferase subunit STT3B	STT3B	YLGDDMKRENPPVEDSSDEDDKRNQGNLYDK	498	-0.27825	0.163876	1.01855	2.20865e-06	0.740296	3.34152e-05	-0.327601	0.0200672	-0.0493519	0.86605
Q8TDD1	ATP-dependent RNA helicase DDX54	DDX54	LYQKWKQKQKIDDRDSDEEGASDRRGPERRG	782	-0.422664	0.198458	1.02419	8.27736e-05	0.601527	0.00339761	-0.29546	0.153981	0.127204	0.74468
Q8TDX7	Serine/threonine-protein kinase Nek7	NEK7	___________MDEQSQGMQGPPVPQFQPQK	5	-0.789483	0.280615	3.95498	1.48942e-06	3.16549	1.18494e-05	-0.63568	0.168301	0.153803	0.895009
Q8TDY2	RB1-inducible coiled-coil protein 1	RB1CC1	ITDLLSEQKASVSQTSPQSASSPRMESTAGI	647	0.372696	0.672412	2.6212	8.34304e-05	2.99389	4.47004e-05	0.401511	0.455979	0.0288152	0.98118
Q8TEQ6	Gem-associated protein 5	GEMIN5	EESMKENSGPVENGVSDQEGEEQAREPELPC	778	-0.138252	0.816441	1.25866	0.000583715	1.12041	0.00147455	-0.0872456	0.806607	0.0510065	0.959949
Q8TEW0	Partitioning defective 3 homolog	PARD3	RWSTTAGFLKQNTAGSPKTCDRKKDENYRSL	187	-0.223131	0.438691	0.0146104	0.917364	-0.208521	0.154104	-0.294168	0.106813	-0.0710374	0.865428
Q8TF01	Arginine/serine-rich protein PNISR	PNISR	RSRDRRKIDDQRGNLSGNSHKHKGEAKEQER	650	0.496059	0.175882	-1.2053	5.56289e-05	-0.70924	0.00245708	0.121689	0.612662	-0.37437	0.200902
Q8TF01	Arginine/serine-rich protein PNISR	PNISR	LKRKRESERTFSRSGSISVKIIRHDSRQDSK	726	-0.148269	0.539124	0.893798	2.07107e-05	0.745529	0.000108169	-0.45645	0.0095615	-0.308181	0.100269
Q8TF74	WAS/WASL-interacting protein family member 2	WIPF2	PPPYRQPPGVPNGPSSPTNESAPELPQRHNS	267	0.0773308	0.64543	0.109045	0.177021	0.186376	0.0345899	0.207136	0.0513404	0.129805	0.33332
Q8WU20	Fibroblast growth factor receptor substrate 2	FRS2	RLTSTSTSDTQNINNSAQRRTALLNYENLPS	339	-1.20551	0.395058	-0.166298	0.809952	-1.37181	0.0646798	-0.377849	0.681796	0.82766	0.525437
Q8WU79	Stromal membrane-associated protein 2	SMAP2	SNTLEKDLDLLASVPSPSSSGSRKVVGSMPT	219	0.652839	0.172325	-1.80238	1.99195e-05	-1.14954	0.000615551	0.691399	0.0322263	0.0385592	0.961248
Q8WUA4	General transcription factor 3C polypeptide 2	GTF3C2	LLLKLSKDLDRPESQSPKRPPEDFETPSGER	167	0.107678	0.560577	0.82485	5.48837e-06	0.932528	3.97275e-06	0.0741293	0.532273	-0.0335491	0.912628
Q8WUB8	PHD finger protein 10	PHF10	KRKNKGTSDSSSGNVSEGESPPDSQEDSFQG	327	-1.00268	0.217021	2.25374	0.000195318	1.25105	0.00905102	-0.260792	0.625416	0.74189	0.262815
Q8WUF5	RelA-associated inhibitor	PPP1R13L	PRSWQPVSRIPMPPSSPQPRGAPRQRPIPLS	358	0.0731426	0.860678	-1.1834	6.06726e-05	-1.11026	0.000129998	0.0595318	0.806607	-0.0136107	0.981013
Q8WUF5	RelA-associated inhibitor	PPP1R13L	PLASDRRSDAGSYRRSLGSAGPSGTLPRSWQ	332	0.174777	0.909901	-2.78666	0.00129834	-2.61188	0.00226202	-0.154203	0.862511	-0.328981	0.86605
Q8WUI4	Histone deacetylase 7	HDAC7	PLAQGGHRPLSRAQSSPAAPASLSAPEPASQ	487	-1.3126	0.0222818	0.74791	0.012724	-0.564691	0.047199	-1.20254	0.00388175	0.110058	0.895009
Q8WV44	E3 ubiquitin-protein ligase TRIM41	TRIM41	EKVGPGGSSVGSGDASSSRHHHRRRRLHLPQ	526	-0.229064	0.833408	-1.80417	0.00275811	-2.03323	0.00151092	-0.132398	0.836616	0.0966655	0.959949
Q8WVB6	Chromosome transmission fidelity protein 18 homolog	CHTF18	PRTFEEALARGDAASSPAPAASVGSSQGGAR	64	-0.805731	0.149096	3.32304	7.16772e-07	2.51731	8.61209e-06	-0.87085	0.0235694	-0.0651183	0.955338
Q8WVC0	RNA polymerase-associated protein LEO1	LEO1	EEDKAQRLLKAKKLTSDEEGEPSGKRKAEDD	630	-0.114432	0.651326	0.96252	1.4809e-05	0.848088	5.28615e-05	-0.0673589	0.676349	0.0470729	0.906962
Q8WVC0	RNA polymerase-associated protein LEO1	LEO1	EDDDKANKKHKKYVISDEEEEDDD_______	658	-0.276462	0.21634	1.23981	1.24964e-06	0.963343	1.2009e-05	-0.17799	0.207491	0.0984726	0.68607
Q8WVM8	Sec1 family domain-containing protein 1	SCFD1	HLNRVNLEESSGVENSPAGARPKRKNKKSYD	303	0.650935	0.323088	-2.11715	6.54477e-05	-1.46621	0.00102176	0.725328	0.0866409	0.0743935	0.956736
Q8WWI1	LIM domain only protein 7	LMO7	TGHLVMDVRRYGKAGSPETKWIDATSGIYNS	1129	0.0502112	0.824226	-1.21747	7.15752e-07	-1.16726	1.86512e-06	-0.161935	0.205568	-0.212146	0.190955
Q8WWI1	LIM domain only protein 7	LMO7	TSGLDLMSESGEGEISPQREVSRSQDQFSDM	1026	-0.631251	0.102008	-0.0109621	0.953692	-0.642213	0.00534642	-0.081692	0.740612	0.549559	0.0658579
Q8WWI1	LIM domain only protein 7	LMO7	NKEPVSLPGIMRRGESLDNLDSPRSNSWRQP	1510	-0.596606	0.482294	3.02532	2.89799e-05	2.42871	0.000188865	-1.00259	0.0665188	-0.405983	0.64522
Q8WWI1	LIM domain only protein 7	LMO7	LPGIMRRGESLDNLDSPRSNSWRQPPWLNQP	1516	0.695071	0.566167	-2.22292	0.00282183	-1.52785	0.0226561	0.594802	0.438702	-0.100269	0.960941
Q8WWI1	LIM domain only protein 7	LMO7	TTGVATTQSPTPRSHSPSASQSGSQLRNRSV	1593	1.37828	0.173213	-1.79988	0.00354287	-0.421596	0.405028	0.875606	0.168091	-0.502673	0.631316
Q8WWI1	LIM domain only protein 7	LMO7	RLFQKIYGENGSKSMSDVSAEDVQNLRQLRY	706	-0.867408	0.00810876	0.408675	0.0108466	-0.458733	0.00643608	-0.841292	0.00080205	0.0261165	0.959949
Q8WWI1	LIM domain only protein 7	LMO7	AGSVKTSTTGVATTQSPTPRSHSPSASQSGS	1586	0.971652	0.311475	-1.80614	0.00255715	-0.834483	0.0955982	0.908384	0.135498	-0.0632677	0.96524
Q8WWI1	LIM domain only protein 7	LMO7	LRSRSTQMESTRVSASLPRSYRKTDTVRLTS	895	0.0429953	0.967652	-2.02678	0.000376827	-1.98379	0.000530723	0.0593684	0.913077	0.0163731	0.991687
Q8WWK9	Cytoskeleton-associated protein 2	CKAP2	TLSRSIASEVIARPASLSNDKLMEKSEPVDQ	328	0.88515	0.282333	-2.59035	8.03502e-05	-1.7052	0.00165839	0.238439	0.661551	-0.646711	0.348802
Q8WWK9	Cytoskeleton-associated protein 2	CKAP2	YLQSVKKKVQFDGTNSAFKELKFLTPVRRSR	614	0.495937	0.663214	-3.93376	2.83363e-05	-3.43782	0.000104841	0.777323	0.254592	0.281386	0.863825
Q8WWM7	Ataxin-2-like protein	ATXN2L	QRELRAAQLAREIESSPQYRLRIAMENDDGR	306	0.569414	0.502771	-1.99606	0.000542014	-1.42664	0.005096	0.657229	0.212289	0.0878152	0.959949
Q8WWM7	Ataxin-2-like protein	ATXN2L	KEKEVDGLLTSEPMGSPVSSKTESVSDKEDK	594	0.272748	0.136724	-0.697209	1.76863e-05	-0.424461	0.000747737	0.327184	0.0131125	0.0544357	0.826229
Q8WWM7	Ataxin-2-like protein	ATXN2L	EEKHSAVQRQGSGRESPSLASREGKYIPLPQ	339	-0.187208	0.277345	-0.0537057	0.524311	-0.240914	0.0147363	-0.0851527	0.440837	0.102056	0.525437
Q8WWM7	Ataxin-2-like protein	ATXN2L	LSSLPPRGPHHLDNSSPGPGSEARGINGGPS	391	0.1458	0.604461	-1.70769	5.89777e-07	-1.56189	2.02664e-06	0.0634135	0.724486	-0.0823863	0.828372
Q8WWM7	Ataxin-2-like protein	ATXN2L	IGSARGQSTGKGPPQSPVFEGVYNNSRMLHF	111	-0.110068	0.660736	0.079807	0.497031	-0.0302611	0.802207	-0.392786	0.0204267	-0.282718	0.13655
Q8WWM7	Ataxin-2-like protein	ATXN2L	ELRKFGAQFKLQPSSSPENSLDPFPPRILKE	559	-0.0509736	0.903864	-0.769599	0.00135032	-0.820572	0.00104703	-0.191968	0.416144	-0.140994	0.747271
Q8WWM7	Ataxin-2-like protein	ATXN2L	SPKAQRPLRGAKTLSSPSNRPSGETSVPPPP	424	1.24922	0.000399465	-2.36552	1.89073e-08	-1.1163	3.2987e-06	1.27697	8.81065e-06	0.0277503	0.945672
Q8WWQ0	PH-interacting protein	PHIP	TRNQGRRTAFYNEDDSEEEQRQLLFEDTSLT	1783	0.0317201	0.931183	0.987198	7.01668e-05	1.01892	7.68526e-05	-0.285391	0.14523	-0.317111	0.199969
Q8WWQ0	PH-interacting protein	PHIP	STSEVHSPPNVGLRRSGQIEGVRQMHSNAPR	692	0.851404	0.00311263	-3.0596	5.97194e-09	-2.20819	1.17924e-07	0.905039	0.00012814	0.0536341	0.876144
Q8WWQ0	PH-interacting protein	PHIP	KRGPGRKPKVEVNTNSGEIIHKKRGRKPKKL	1651	0.591456	0.394286	-0.91598	0.0167284	-0.324524	0.346711	0.113022	0.805941	-0.478434	0.418449
Q8WX93	Palladin	PALLD	PAGFPKKASRTARIASDEEIQGTKDAVIQDL	893	-0.0684362	0.865413	0.423911	0.0277556	0.355474	0.0591374	-0.901125	0.00211853	-0.832689	0.00665238
Q8WX93	Palladin	PALLD	PMSALASRSAPAMQSSGSFNYARPKQFIAAQ	726	0.945458	0.0204396	-3.60114	3.43221e-08	-2.65568	6.25088e-07	0.66682	0.0136099	-0.278638	0.377962
Q8WX93	Palladin	PALLD	SGHPHVRRPRSRSRDSGDENEPIQERFFRPH	1121	-0.190458	0.514165	0.342699	0.028091	0.152242	0.292635	-0.352592	0.0595304	-0.162134	0.548753
Q8WXF1	Paraspeckle component 1	PSPC1	VHNDRFPQGPPSQMGSPMGSRTGSETPQAPM	477	0.387124	0.266788	-0.567392	0.0060482	-0.180269	0.305666	0.695784	0.00813279	0.30866	0.281111
Q8WXG6	MAP kinase-activating death domain protein	MADD	SSVIKHSPTVKREPPSPQGRSSNSSENQQFL	930	0.280379	0.554228	-0.770521	0.00578735	-0.490142	0.0518594	0.582993	0.0578401	0.302614	0.471353
Q8WYL5	Protein phosphatase Slingshot homolog 1	SSH1	FFMVKGAALFLQQGSSPQGQRSLQHPHKHAG	57	-0.00458691	0.997299	-1.457	0.0198079	-1.46159	0.0208434	0.0820314	0.914379	0.0866183	0.961424
Q8WYP5	Protein ELYS	AHCTF1	LRSTPLASPSPSPGRSPQRLKETRISFVEED	1222	-0.498429	0.0337672	3.79765	2.90946e-09	3.29922	7.87438e-09	-0.728164	0.000446006	-0.229735	0.196036
Q8WYP5	Protein ELYS	AHCTF1	ESVEIINDLKVSTVTSPSRMIRKLRSTNLDA	1898	1.18712	0.00011107	-1.0094	4.41062e-07	0.177721	0.0368556	1.5272	1.07442e-06	0.340081	0.0101818
Q92522	Histone H1x	H1FX	GMAKKVTKAGGSAALSPSKKRKNSKKKNQPG	31	0.143696	0.697333	1.30373	2.22633e-05	1.44743	1.56136e-05	0.219935	0.317821	0.0762389	0.888185
Q92530	Proteasome inhibitor PI31 subunit	PSMF1	IITPIHEQWEKANVSSPHREFPPATAREVDP	153	1.07445	0.00320272	-1.18093	1.21418e-05	-0.10648	0.466593	1.04859	0.000237519	-0.0258631	0.960879
Q92538	Golgi-specific brefeldin A-resistance guanine nucleotide exchange factor 1	GBF1	ACDFEKPESPRAASSSSPGSPVASSPSRLSP	1780	0.821026	0.384266	1.83839	0.00189428	2.65942	0.000202894	0.0882947	0.888467	-0.732731	0.346137
Q92538	Golgi-specific brefeldin A-resistance guanine nucleotide exchange factor 1	GBF1	EKPESPRAASSSSPGSPVASSPSRLSPTPDG	1784	0.627741	0.456593	3.3432	1.34273e-05	3.97094	6.37749e-06	0.307766	0.568567	-0.319975	0.747271
Q92541	RNA polymerase-associated protein RTF1 homolog	RTF1	KVHDFDVKIDLQVPSSESKALAITSKAPPAK	675	0.0137416	0.990198	-3.18033	0.000111061	-3.16658	0.000151176	0.308989	0.659265	0.295247	0.844551
Q92575	UBX domain-containing protein 4	UBXN4	QTSVRVTSSEPPNPASSSKSEKREPVRKRVL	456	0.678672	0.78948	-1.27585	0.261548	-0.597177	0.603325	0.521424	0.727427	-0.157248	0.96365
Q92576	PHD finger protein 3	PHF3	EDQENNLQDNQTSNSSPCRSNVGKGNIDGNV	1614	0.0353834	0.885632	0.594512	0.000198031	0.629895	0.000171365	0.273651	0.053067	0.238268	0.161711
Q92598	Heat shock protein 105 kDa	HSPH1	NTCEPVVTQPKPKIESPKLERTPNGPNIDKK	809	-0.0955736	0.566167	0.604694	2.5272e-05	0.509121	0.000120736	0.100891	0.332669	0.196464	0.13284
Q92614	Unconventional myosin-XVIIIa	MYO18A	SSSPTSYWKSLAPDRSDDEHDPLDNTSRPRY	2020	-0.0959472	0.753963	0.988532	3.31718e-05	0.892585	9.73347e-05	-0.158226	0.3724	-0.0622786	0.882012
Q92615	La-related protein 4B	LARP4B	SYAEICQRTSKEPPSSPLQPQKEQKPNTVGC	664	0.502295	0.411819	-1.02245	0.00486135	-0.520153	0.0991864	0.735245	0.0619544	0.232949	0.745757
Q92615	La-related protein 4B	LARP4B	AMGKRLSREQSTPPKSPQ_____________	736	-0.26462	0.174426	3.67925	2.90946e-09	3.41463	3.63828e-09	-0.190681	0.122769	0.0739392	0.747271
Q92625	Ankyrin repeat and SAM domain-containing protein 1A	ANKS1A	TCSPTEDATMGSRSESLSNCSIGKKRLEKSP	647	-0.457788	0.268862	2.13919	2.05213e-06	1.6814	1.78927e-05	0.157671	0.560146	0.615459	0.0617578
Q92625	Ankyrin repeat and SAM domain-containing protein 1A	ANKS1A	AISCHSLDSMASGRSSDQDSTNKEAEAAGVK	382	1.00212	0.00737733	-1.66596	1.76353e-06	-0.663847	0.00151092	0.23101	0.243931	-0.771105	0.00556715
Q92685	Dol-P-Man:Man(5)GlcNAc(2)-PP-Dol alpha-1,3-mannosyltransferase	ALG3	___MAAGLRKRGRSGSAAQAEGLCKQWLQRA	13	-0.408428	0.531081	1.91602	0.00011348	1.50759	0.000725937	-0.962264	0.0284305	-0.553836	0.293717
Q92734	Protein TFG	TFG	NDTVDGREEKSASDSSGKQSTQVMAASMSAF	153	0.463055	0.268862	-1.21308	0.000144105	-0.750027	0.00394167	0.0267433	0.924958	-0.436312	0.193639
Q92738	USP6 N-terminal-like protein	USP6NL	LPVDTGAGGYSGNSGSPKNGKLIIPPVDYLP	716	0.198958	0.514165	0.340966	0.0345675	0.539924	0.0037644	0.120155	0.536148	-0.0788033	0.858825
Q92754	Transcription factor AP-2 gamma	TFAP2C	ALIVIDKSYMNPGDQSPADSNKTLEKMEKHR	434	-0.574263	0.0951006	0.74776	0.000891788	0.173497	0.306393	-0.552204	0.0200897	0.0220588	0.965358
Q92793	CREB-binding protein	CREBBP	PSALQDLLRTLKSPSSPQQQQQVLNILKSNP	2079	0.75758	0.114314	-3.4823	1.83219e-07	-2.72472	1.86512e-06	0.526209	0.0845811	-0.231371	0.639259
Q92804	TATA-binding protein-associated factor 2N	TAF15	PYNNQGQQQNMESSGSQGGRAPSYDQPDYGQ	97	-1.01602	0.00524031	2.98863	2.8935e-08	1.97261	9.518e-07	-0.408558	0.0413321	0.607466	0.0145029
Q92887	Canalicular multispecific organic anion transporter 1	ABCC2	NSGARLPGLNKNQSQSQDALVLEDVEKKKKK	283	-0.606329	0.0026837	0.48833	9.39442e-05	-0.117999	0.149395	0.29754	0.0109256	0.903869	4.19174e-05
Q92890	Ubiquitin fusion degradation protein 1 homolog	UFD1L	HSGYAGELGFRAFSGSGNRLDGKKKGVEPSP	231	0.794705	0.354741	-2.83056	5.19536e-05	-2.03586	0.000656186	0.38012	0.486029	-0.414586	0.640355
Q92890	Ubiquitin fusion degradation protein 1 homolog	UFD1L	DEAGGRFVAFSGEGQSLRKKGRKP_______	299	0.216573	0.747718	-1.17392	0.00239914	-0.957343	0.00862424	0.145618	0.717708	-0.0709547	0.956736
Q92922	SWI/SNF complex subunit SMARCC1	SMARCC1	SFRQRISTKNEEPVRSPERRDRKASANARKR	310	-0.121442	0.428336	1.03229	3.12335e-07	0.910852	1.48582e-06	-0.0668327	0.493241	0.0546095	0.770478
Q92922	SWI/SNF complex subunit SMARCC1	SMARCC1	VLADTPSGLVPLHLRSPQVPAAQQMLNFPEK	573	0.973508	0.0203638	-2.33367	6.60497e-07	-1.36016	4.60458e-05	1.03938	0.00150574	0.0658748	0.919035
Q92922	SWI/SNF complex subunit SMARCC1	SMARCC1	KSGKKGQASLYGKRRSQKEEDEQEDLTKDME	357	0.705315	0.166931	-2.26027	6.10859e-06	-1.55495	0.000129212	0.443786	0.166677	-0.261529	0.610436
Q92945	Far upstream element-binding protein 2	KHSRP	PPNGDPNFKLFIIRGSPQQIDHAKQLIEEKI	480	0.88695	0.146604	-2.15092	3.18337e-05	-1.26397	0.00155959	0.260994	0.504586	-0.625956	0.19705
Q92945	Far upstream element-binding protein 2	KHSRP	QINKIQQDSGCKVQISPDSGGLPERSVSLTG	181	0.384005	0.0660969	-0.691433	4.228e-05	-0.307428	0.00965349	0.0645764	0.626927	-0.319429	0.0475062
Q92974	Rho guanine nucleotide exchange factor 2	ARHGEF2	REPALPLEPDSGGNTSPGVTANGEARTFNGS	696	-0.521271	0.213018	0.070604	0.730471	-0.450667	0.0453719	-0.476938	0.0777246	0.0443328	0.959949
Q92974	Rho guanine nucleotide exchange factor 2	ARHGEF2	SVHRNFEDRERQELGSPEERLQDSSDPDTGS	932	-0.0519916	0.81533	-0.10159	0.297928	-0.153582	0.132788	-0.0333993	0.801428	0.0185923	0.959949
Q92979	Ribosomal RNA small subunit methyltransferase NEP1	EMG1	__MAAPSDGFKPRERSGGEQAQDWDALPPKR	14	0.293137	0.439572	-1.89932	2.39866e-06	-1.60618	1.25415e-05	-0.00902233	0.973523	-0.302159	0.33332
Q93008	Probable ubiquitin carboxyl-terminal hydrolase FAF-X	USP9X	TGQRAQENYEGSEEVSPPQTKDQ________	2547	0.422033	0.609682	-2.12104	0.000285866	-1.69901	0.00148243	0.0203211	0.972763	-0.401712	0.632494
Q93009	Ubiquitin carboxyl-terminal hydrolase 7	USP7	HQQQQQQQKAGEQQLSEPEDMEMEAGDTDDP	18	-0.266192	0.158801	1.28914	2.96271e-07	1.02294	2.60948e-06	-0.266457	0.0358384	-0.00026525	0.999997
Q969H6	Ribonuclease P/MRP protein subunit POP5	POP5	QKSVTRSCLLEEEEESGEEAAEAME______	154	-0.422399	0.13086	1.30855	3.70546e-06	0.886155	9.10289e-05	-0.450376	0.0202385	-0.0279779	0.959949
Q969J3	Loss of heterozygosity 12 chromosomal region 1 protein	LOH12CR1	PTFQPLLKGLLSGQTSPTNAKLEKLDSQQVL	75	0.978111	0.174975	-2.91439	1.22987e-05	-1.93628	0.000300345	0.876393	0.0615525	-0.101718	0.938653
Q969S3	Zinc finger protein 622	ZNF622	MNAAIQQAIKAQPSMSPKKAPPAPAKEARNV	143	-0.122985	0.724903	0.64306	0.00187235	0.520075	0.00731165	0.0666419	0.752423	0.189626	0.532399
Q969T4	Ubiquitin-conjugating enzyme E2 E3	UBE2E3	________MSSDRQRSDDESPSTSSGSSDAD	8	-0.0519136	0.889182	1.27412	1.5217e-05	1.2222	2.98484e-05	0.0803664	0.706335	0.13228	0.72516
Q969V6	MKL/myocardin-like protein 1	MKL1	ILVKEEGPRAGSCCLSPGGRAELEGRDKDQM	511	-0.129931	0.817193	-1.02753	0.00151828	-1.15746	0.000830146	0.733508	0.0314397	0.863439	0.0334065
Q969W3	Protein FAM104A	FAM104A	ADAGSSGGTGPTEGYSPPAASTRAAARAKAR	21	0.393532	0.428336	-0.127986	0.594798	0.265546	0.285501	0.324919	0.294704	-0.0686129	0.939541
Q96AE4	Far upstream element-binding protein 1	FUBP1	WAEYYRQQAAYYAQTSPQGMPQHPPAPQGQ_	630	0.293081	0.137743	-0.973707	2.67823e-06	-0.680626	5.21291e-05	-0.0244318	0.850458	-0.317513	0.0422169
Q96AT1	Uncharacterized protein KIAA1143	KIAA1143	QDSVKKNSQKQIKNSSLLSFDNEDENE____	143	2.29851	0.00579397	-3.01583	7.42585e-06	-0.717318	0.0542553	-0.989679	0.0356481	-3.28819	0.000109787
Q96AT1	Uncharacterized protein KIAA1143	KIAA1143	VKKNSQKQIKNSSLLSFDNEDENE_______	146	0.028227	0.965268	0.430329	0.0846625	0.458556	0.0725731	-0.494366	0.109161	-0.522593	0.173125
Q96B01	RAD51-associated protein 1	RAD51AP1	LSVKELPTVTTNVQNSQDKSIEKHGSSKIET	120	-1.65658	0.00411787	2.25307	3.37203e-06	0.59649	0.0223733	-1.48716	0.000541244	0.169419	0.768744
Q96B01	RAD51-associated protein 1	RAD51AP1	GSRSSSSPLVVVSVKSPNQSLRLGLSRLARV	327	0.582974	0.183504	-0.481299	0.0395177	0.101675	0.642518	0.327894	0.23174	-0.25508	0.532399
Q96B23	Uncharacterized protein C18orf25	C18orf25	VISSMPCLLMELRRDSSESQLASTESDKPTT	66	-0.377825	0.392768	0.140554	0.508372	-0.237271	0.280693	-0.729038	0.0184867	-0.351213	0.331657
Q96B36	Proline-rich AKT1 substrate 1	AKT1S1	RTEARSSDEENGPPSSPDLDRIAASMRALVL	212	-0.856478	0.0110721	1.90658	4.67839e-07	1.05011	4.77205e-05	-0.588404	0.00843201	0.268074	0.270683
Q96C19	EF-hand domain-containing protein D2	EFHD2	LLRRADLNQGIGEPQSPSRRVFNPYTEFKEF	74	0.270684	0.651136	-0.68188	0.0292664	-0.411196	0.16349	0.415098	0.249076	0.144413	0.865428
Q96C57	Uncharacterized protein C12orf43	C12orf43	RLFFTSVPGGREKEESPQPRRKRQPSSSSED	138	-0.0140429	0.976433	0.684609	0.00180626	0.670566	0.00237372	-0.0874609	0.698953	-0.073418	0.894205
Q96C90	Protein phosphatase 1 regulatory subunit 14B	PPP1R14B	TAGGAALAAPAPGPGSGGPGPRVYFQSPPGA	21	0.394437	0.498436	0.200838	0.472726	0.595275	0.0524745	0.00452169	0.991685	-0.389916	0.437197
Q96C90	Protein phosphatase 1 regulatory subunit 14B	PPP1R14B	PGPGSGGPGPRVYFQSPPGAAGEGPGGADDE	32	-0.426912	0.638622	-1.63969	0.00268569	-2.0666	0.000723	-0.333722	0.560146	0.0931901	0.959949
Q96CB8	Integrator complex subunit 12	INTS12	PPPLTLGKTGLSRSVSCDNVSKVGLPSPSSL	378	-0.661389	0.0805381	0.615182	0.00512714	-0.0462075	0.802207	-0.579452	0.0235164	0.0819372	0.882012
Q96CP2	FLYWCH family member 2	FLYWCH2	PSEQEGESVKASQEPSPKPGTEVIPAAPRKP	21	0.735745	0.146328	-0.762701	0.00879328	-0.0269564	0.917037	0.620994	0.0584074	-0.114751	0.87967
Q96CP6	GRAM domain-containing protein 1A	GRAMD1A	SDITSSGAADRSQEPSPVGSRRGHVTPNLSR	267	0.381001	0.365626	0.5187	0.0235346	0.899701	0.00126266	0.109993	0.689783	-0.271008	0.465897
Q96D71	RalBP1-associated Eps domain-containing protein 1	REPS1	PPPPPRPQPSHSRSSSLDMNRTFTVTTGQQQ	562	-0.407427	0.0588745	1.02746	2.76368e-06	0.620032	0.000147882	-0.256681	0.0578401	0.150745	0.395369
Q96DT7	Zinc finger and BTB domain-containing protein 10	ZBTB10	DGSGAEGGSCSSSRRSGGDGGDEVEGSGVGA	210	0.335	0.8112	-1.12896	0.0814602	-0.793965	0.212352	0.403454	0.624305	0.0684541	0.973615
Q96EB6	NAD-dependent protein deacetylase sirtuin-1;SirtT1 75 kDa fragment	SIRT1	__MADEAALALQPGGSPSAAGADREAASSPA	14	1.08153	0.399619	-1.16358	0.0769642	-0.0820479	0.899435	1.75446	0.039052	0.672923	0.586769
Q96EB6	NAD-dependent protein deacetylase sirtuin-1;SirtT1 75 kDa fragment	SIRT1	GGSPSAAGADREAASSPAGEPLRKRPRRDGP	27	0.116285	0.795508	-0.351533	0.0922443	-0.235248	0.252416	0.413929	0.110201	0.297644	0.391431
Q96EB6	NAD-dependent protein deacetylase sirtuin-1;SirtT1 75 kDa fragment	SIRT1	PLRKRPRRDGPGLERSPGEPGGAAPEREVPA	47	0.14179	0.450461	0.266161	0.01205	0.407951	0.00114356	0.588856	0.000566697	0.447066	0.00598408
Q96F86	Enhancer of mRNA-decapping protein 3	EDC3	NIPKRTDVKSQDVAVSPQQQQCSKSYVDRHM	131	-0.106178	0.530213	0.343909	0.00142018	0.237732	0.0130973	-0.00950612	0.932285	0.0966716	0.534341
Q96FF9	Sororin	CDCA5	LKRIVAHAVEVPAVQSPRRSPRISFFLEKEN	75	-0.0920401	0.78948	-0.106478	0.483168	-0.198518	0.209984	-0.195715	0.317821	-0.103675	0.796544
Q96FJ0	AMSH-like protease	STAMBPL1	ADQPNKSDATNYASHSPPVNRALTPAATLSA	242	-0.836016	0.3549	0.483769	0.274014	-0.352247	0.433316	-0.747936	0.186874	0.0880802	0.959949
Q96GM8	Target of EGR1 protein 1	TOE1	___________MAADSDDGAVSAPAASDGGV	5	-0.148314	0.510275	0.883529	1.35735e-05	0.735215	7.15728e-05	-0.166753	0.230339	-0.0184389	0.960941
Q96GX5	Serine/threonine-protein kinase greatwall	MASTL	EKTSPKGVENPAVQESNQKMLGPPLEVLKTL	631	0.0665541	0.959097	-2.43321	0.000559077	-2.36665	0.0008141	0.293283	0.66266	0.226729	0.882012
Q96GX9	Methylthioribulose-1-phosphate dehydratase	APIP	DMFVCDINEKDISGPSPSKKLKKSQCTPLFM	87	0.601975	0.00167271	-0.195018	0.015939	0.406957	0.000220684	0.635684	5.97668e-05	0.0337095	0.876144
Q96GY0	Zinc finger C2HC domain-containing protein 1A	ZC2HC1A	ASSLNGGNIKGIEGHSPGNLPKFCHECGTKY	292	0.0422992	0.974502	-1.71123	0.00277958	-1.66893	0.00365979	0.393629	0.508056	0.35133	0.747271
Q96H79	Zinc finger CCCH-type antiviral protein 1-like	ZC3HAV1L	KHMKLHKMLENTDNSSPSTEHSQGLEKQGVH	257	0.950361	0.00536798	-2.67317	3.87743e-08	-1.7228	1.35535e-06	-0.169083	0.34552	-1.11944	0.000311992
Q96HB5	Coiled-coil domain-containing protein 120	CCDC120	SPPKAWDQLRAVSGGSPERRTPWKPPPSDLY	256	-0.0935389	0.655329	0.998705	2.796e-06	0.905166	9.17801e-06	-0.114391	0.370572	-0.020852	0.959949
Q96HC4	PDZ and LIM domain protein 5	PDLIM5	HLKESEADNTKKANNSQEPSPQLASSVASTR	309	0.082197	0.940988	-1.71965	0.00282183	-1.63746	0.00424854	-0.0154589	0.980542	-0.0976559	0.959949
Q96HC4	PDZ and LIM domain protein 5	PDLIM5	SEADNTKKANNSQEPSPQLASSVASTRSMPE	313	0.142094	0.748007	-1.83764	5.33011e-06	-1.69555	1.49205e-05	-0.051357	0.849244	-0.193451	0.651819
Q96HC4	PDZ and LIM domain protein 5	PDLIM5	CSETSQELAEGQRRGSQGDSKQQNGPPRKHI	228	-0.0056718	0.990198	-0.868526	0.00119809	-0.874198	0.00133994	-0.521486	0.0527025	-0.515814	0.111143
Q96I24	Far upstream element-binding protein 3	FUBP3	QVAFYGQTLGQAQAHSQEQ____________	569	-0.691966	0.0168668	0.951454	2.63306e-05	0.259487	0.0617572	-0.13106	0.432787	0.560907	0.0107525
Q96I25	Splicing factor 45	RBM17	DRHEASGFARRPDPDSDEDEDYERERRKRSM	155	-0.483481	0.0973707	1.22234	8.17264e-06	0.73886	0.000392703	-0.248744	0.167461	0.234737	0.320713
Q96I25	Splicing factor 45	RBM17	DSDEDEDYERERRKRSMGGAAIAPPTSLVEK	169	1.19629	0.178007	-3.73494	9.19531e-06	-2.53865	0.000200809	0.779482	0.164048	-0.416807	0.657563
Q96II8	Leucine-rich repeat and calponin homology domain-containing protein 3	LRCH3	QRDAVLDFVKQKASQSPQKQHPLLDGVDGEC	516	0.369313	0.405735	-0.399654	0.0788755	-0.030341	0.89385	0.431989	0.121807	0.0626761	0.93704
Q96II8	Leucine-rich repeat and calponin homology domain-containing protein 3	LRCH3	LRVAEITKEQRLRRESQYQENRGSLVVTNGG	352	0.132398	0.824967	-1.22394	0.0007506	-1.09155	0.00183626	0.0300796	0.933893	-0.102319	0.908887
Q96J02	E3 ubiquitin-protein ligase Itchy homolog	ITCH	VDGQSKKTEKCNNTNSPKWKQPLTVIVTPVS	62	0.474433	0.0796711	-2.42797	4.37688e-08	-1.95354	5.02535e-07	0.240266	0.147835	-0.234167	0.276637
Q96JH7	Deubiquitinating protein VCIP135	VCPIP1	QASMDRHLRDQSTEQSPSDLPQRKTEVVSSS	1132	0.190566	0.605676	-0.871064	0.000515157	-0.680499	0.00292251	0.126702	0.59019	-0.0638639	0.914989
Q96JM3	Chromosome alignment-maintaining phosphoprotein 1	CHAMP1	LFPSSKKLKKDNQESSDAELSSSEYIKTDLD	627	-0.685049	0.241849	1.72158	0.000131756	1.03653	0.00426445	0.105672	0.788049	0.790721	0.0870303
Q96JM3	Chromosome alignment-maintaining phosphoprotein 1	CHAMP1	KPALFPEPAKTAPPASPEARKRALFPEPRKH	542	-0.0789258	0.753967	1.12989	3.05588e-06	1.05096	8.63794e-06	-0.10643	0.472166	-0.0275038	0.954531
Q96JM3	Chromosome alignment-maintaining phosphoprotein 1	CHAMP1	SPAASPESRKSARTTSPEPRKPSPSESPEPW	275	-0.1938	0.303647	1.2398	3.91185e-07	1.046	2.32156e-06	-0.161689	0.174191	0.0321117	0.920117
Q96JP5	E3 ubiquitin-protein ligase ZFP91	ZFP91	PPDVPGQQPQAAKSPSPVQGKKSPRLLCIEK	103	-1.0018	0.0320816	3.93015	5.79e-08	2.92835	9.07826e-07	-1.32314	0.000805846	-0.321347	0.395369
Q96KQ7	Histone-lysine N-methyltransferase EHMT2	EHMT2	NSGGGLSEELGSARRSGEVTLTKGDPGSLEE	246	0.961485	0.0730813	-2.79432	1.51024e-06	-1.83284	4.77205e-05	0.972384	0.0108242	0.0108988	0.991687
Q96L91	E1A-binding protein p400	EP400	LAPVSGSGPGPSPARSSPVNRPSSATNKALS	721	0.898771	0.0270148	-0.391347	0.0500711	0.507423	0.017584	0.618153	0.0201778	-0.280617	0.380302
Q96L91	E1A-binding protein p400	EP400	APVSGSGPGPSPARSSPVNRPSSATNKALSP	722	0.830664	0.0112029	-0.246496	0.0966902	0.584169	0.00190762	0.463531	0.0220742	-0.367134	0.107979
Q96MG7	Melanoma-associated antigen G1	NDNL2	EENRARPQPSGPAPSS_______________	304	1.00132	0.00816108	-1.31548	1.22987e-05	-0.314164	0.0680502	0.438312	0.0427575	-0.563004	0.0322908
Q96MG7	Melanoma-associated antigen G1	NDNL2	STSRGPGGSQGSQGPSPQGARRAQAAPAVGP	64	1.06417	0.0293657	-1.2585	0.000201617	-0.194328	0.396675	1.09661	0.0028659	0.0324329	0.962323
Q96MH2	Protein HEXIM2	HEXIM2	SPVALEEAKTSGAPGSPQTPPERHDSGGSLP	29	-1.53604	0.11134	2.90117	9.7682e-05	1.36513	0.0128494	-1.62733	0.0163936	-0.0912973	0.959949
Q96N46	Tetratricopeptide repeat protein 14	TTC14	EDPRDFYNSYKTQAGSSKTEKPYKSERHFSS	610	0.294938	0.616982	-2.53153	6.48473e-06	-2.23659	2.39431e-05	0.432575	0.23146	0.137636	0.871923
Q96N67	Dedicator of cytokinesis protein 7	DOCK7	RPASLNLNRSRSLSNSNPDISGTPTSPDDEV	900	0.0731892	0.736641	3.30753	3.13749e-09	3.38072	3.63828e-09	0.0930877	0.468979	0.0198985	0.959949
Q96N67	Dedicator of cytokinesis protein 7	DOCK7	RGQLGTYTIASPPERSPSGSAFGSQENLRWR	1430	-0.272176	0.858992	0.729649	0.267739	0.457472	0.494742	-0.365877	0.677165	-0.0937004	0.96278
Q96NT5	Proton-coupled folate transporter	SLC46A1	LEKADPHLEFQQFPQSP______________	458	1.03868	0.102973	-1.21388	0.00212182	-0.175199	0.578638	1.01386	0.02107	-0.0248195	0.979244
Q96NT5	Proton-coupled folate transporter	SLC46A1	__________MEGSASPPEKPRARPAAAVLC	6	1.26391	0.130302	-1.7802	0.00105532	-0.516286	0.216556	1.31564	0.0222283	0.0517228	0.967894
Q96NW4	Ankyrin repeat domain-containing protein 27	ANKRD27	LSFERRQKSSEAPVQSPQRSVDSISQESSTS	634	1.17834	0.0132339	-2.35259	1.22531e-06	-1.17425	0.000244133	1.11506	0.00174305	-0.0632754	0.932318
Q96NY9	Crossover junction endonuclease MUS81	MUS81	RLQRHRTSGGDHAPDSPSGENSPAPQGRLAE	95	0.532569	0.328296	2.6702	2.94668e-06	3.20277	1.60855e-06	-0.132459	0.711878	-0.665028	0.121546
Q96P16	Regulation of nuclear pre-mRNA domain-containing protein 1A	RPRD1A	EQIKVDENENCSSLGSPSEPPQTLDLVRALQ	156	-0.319395	0.253357	1.0912	1.61828e-05	0.771808	0.000258618	-0.166056	0.349194	0.153339	0.566786
Q96PK6	RNA-binding protein 14	RBM14	DRRLAELSDYRRLSESQLSFRRSPTKSSLDY	620	-0.187205	0.81533	2.72603	1.84189e-05	2.53883	4.47107e-05	-0.783558	0.0874147	-0.596353	0.310677
Q96PM5	RING finger and CHY zinc finger domain-containing protein 1	RCHY1	ICESYNTAQAGGRRISLDQQ___________	257	-0.116415	0.783675	-0.447247	0.0311147	-0.563662	0.011392	-0.550203	0.0339594	-0.433787	0.152849
Q96PN7	Transcriptional-regulating factor 1	TRERF1	MWPQMHLPDGRAQPGSPESSGQPKGAFGEQF	491	-0.09931	0.569274	0.961314	1.22531e-06	0.862004	4.50536e-06	-0.216977	0.0555927	-0.117667	0.437197
Q96PU4	E3 ubiquitin-protein ligase UHRF2	UHRF2	GQSKKQPSGTTKRPISDDDCPSASKVYKASD	667	-0.475231	0.225936	0.665458	0.00480628	0.190227	0.337484	-0.107022	0.680125	0.368209	0.248022
Q96PY5	Formin-like protein 2	FMNL2	WSRSIEDLHRGSNLPSPVGNSVSRSGRHSAL	183	0.621957	0.363564	-2.40019	3.25972e-05	-1.77823	0.000357691	0.940929	0.038735	0.318972	0.657563
Q96Q15	Serine/threonine-protein kinase SMG1	SMG1	AVRSNTGQKTQPDVMSQNARKLIQKNLATSA	3556	-0.0948074	0.748007	0.244861	0.0817003	0.150053	0.275383	-0.13013	0.455541	-0.0353222	0.945672
Q96Q45	Transmembrane protein 237	TMEM237	SASLEGLAQTAGRRPSEGNEPSTKELKEHPE	62	0.0431437	0.862139	1.06204	2.98721e-06	1.10519	3.94195e-06	-0.656427	0.000752139	-0.699571	0.00104772
Q96QG7	Myotubularin-related protein 9	MTMR9	RRQLAELETEDGMQESP______________	548	-0.111777	0.760626	-0.874692	0.000312371	-0.986469	0.00017367	-0.0268594	0.90585	0.0849175	0.865428
Q96QK1	Vacuolar protein sorting-associated protein 35	VPS35	_________MPTTQQSPQDEQEKLLDEAIQA	7	1.12231	0.0961562	-1.40914	0.00116582	-0.286829	0.388239	0.32128	0.44776	-0.801027	0.12556
Q96QR8	Transcriptional activator protein Pur-beta	PURB	KLYERRGGGSGGGEESEGEEVDED_______	304	-0.355704	0.0655975	1.00823	1.48942e-06	0.652525	5.15339e-05	-0.275297	0.0305079	0.0804066	0.698661
Q96RL1	BRCA1-A complex subunit RAP80	UIMC1	TQLSSSETFDLEREVSPGSRDILDGVRIIMA	463	0.181366	0.269986	-0.239598	0.0110007	-0.058232	0.481306	-0.0066261	0.953864	-0.187992	0.148611
Q96RL1	BRCA1-A complex subunit RAP80	UIMC1	DCLVDFKKQVTVQPGSRTRTKAGRGRRRKF_	705	0.633167	0.319035	-3.19467	2.48664e-06	-2.56151	1.8303e-05	0.523673	0.192109	-0.109494	0.918797
Q96RT1	Protein LAP2	ERBB2IP	DCSVDLGISKSTEDLSPQKSGPVGSVVKSHS	857	0.52723	0.00630275	-0.108862	0.179884	0.418368	0.000397137	0.541079	0.000398844	0.0138494	0.960941
Q96RU3	Formin-binding protein 1	FNBP1	VEGRLPARSEQARRQSGLYDSQNPPTVNNCA	497	-1.58849	0.0422097	1.57914	0.00119077	-0.00935263	0.980822	-0.451053	0.336552	1.13744	0.054292
Q96RU3	Formin-binding protein 1	FNBP1	DIEFEDYTQPMKRTVSDNSLSNSRGEGKPDL	296	-0.403837	0.0572447	1.56518	1.41247e-07	1.16135	1.99619e-06	0.0543244	0.686843	0.458161	0.00853323
Q96RU3	Formin-binding protein 1	FNBP1	FEDYTQPMKRTVSDNSLSNSRGEGKPDLKFG	299	0.325323	0.38164	0.00115221	0.994994	0.326475	0.0892369	0.305475	0.187836	-0.0198478	0.973615
Q96S21	Ras-related protein Rab-40C	RAB40C	KGNSLKRSKSIRPPQSPPQNCSRSNCKIS__	268	0.343009	0.315247	0.0725362	0.663169	0.415545	0.0276752	0.306781	0.155022	-0.0362274	0.959949
Q96S66	Chloride channel CLIC-like protein 1	CLCC1	AKPVSGQDTSGNTEGSPAAEKAQLKSEAAGS	509	0.59892	0.260939	-2.20022	1.0933e-05	-1.6013	0.00014731	0.700041	0.0479795	0.101121	0.909575
Q96S66	Chloride channel CLIC-like protein 1	CLCC1	PARGVAGPRGQDPVSSPCG____________	548	0.554048	0.0627028	-2.78471	3.3239e-08	-2.23066	3.76779e-07	0.804967	0.00123333	0.250919	0.286588
Q96S99	Pleckstrin homology domain-containing family F member 1	PLEKHF1	AAQQRQEEAEEQGAGSPGQPAHLARPICGAS	227	-0.00815695	0.976769	0.503076	0.000482082	0.494919	0.00065126	-0.125553	0.33652	-0.117396	0.546741
Q96ST3	Paired amphipathic helix protein Sin3a	SIN3A	______MKRRLDDQESPVYAAQQRRIPGSTE	10	1.31409	0.0479863	-2.01162	7.52503e-05	-0.697534	0.0426036	1.41064	0.00443064	0.0965515	0.929942
Q96T23	Remodeling and spacing factor 1	RSF1	EPIETKFYETKEESYSPSKDRNIITEGNGTE	473	-0.104261	0.549448	1.15378	3.5467e-07	1.04952	1.36936e-06	-0.136679	0.209925	-0.032418	0.909575
Q96T37	Putative RNA-binding protein 15	RBM15	SRRSLHLDKSSSRGGSREYDTGGGSSSSRLH	109	-0.328196	0.0915132	2.21082	1.36745e-08	1.88262	1.02369e-07	-0.440004	0.00344535	-0.111807	0.526016
Q96T58	Msx2-interacting protein	SPEN	DRDRDHERRPIERSQSPVHLRRPQSPGASPS	727	-0.16309	0.746983	-0.325032	0.162201	-0.488122	0.0495606	-0.336486	0.245083	-0.173396	0.754018
Q96T58	Msx2-interacting protein	SPEN	RKSERIDREKLKRSNSPRGEAQKLLELKMEA	1857	-0.188735	0.333129	1.33828	2.91807e-07	1.14954	1.58858e-06	0.0421139	0.739424	0.230849	0.133733
Q96T58	Msx2-interacting protein	SPEN	RSSRQISEDSERTGGSPSVRHGSFHEDEDPI	1261	-0.431131	0.0212395	0.857237	2.65649e-06	0.426106	0.000511344	-0.158233	0.145585	0.272898	0.0461782
Q96T88	E3 ubiquitin-protein ligase UHRF1	UHRF1	NSKREEEEQQEGGFASPRTGKGKWKRKSAGG	639	-0.0271806	0.975434	-1.07169	0.00494523	-1.09887	0.00480072	-0.129136	0.755333	-0.101955	0.92565
Q96TC7	Regulator of microtubule dynamics protein 3	RMDN3	YSQRWKRTQRHGRSQSLPNSLDYTQTSDPGR	46	-0.585733	0.0805381	1.61511	2.76368e-06	1.02938	0.00010246	-0.901261	0.00134172	-0.315528	0.227728
Q99543	DnaJ homolog subfamily C member 2;DnaJ homolog subfamily C member 2, N-terminally processed	DNAJC2	GRWFEAFVKRRNRNASASFQELEDKKELSEE	47	0.0765409	0.804469	0.35856	0.0201835	0.435101	0.00831654	-0.0575068	0.751381	-0.134048	0.645827
Q99575	Ribonucleases P/MRP protein subunit POP1	POP1	WESRVQAYEEPSVASSPNGKESDLRRSEVPC	730	-0.0487418	0.867873	0.741915	0.000151041	0.693173	0.000304704	0.042922	0.80483	0.0916638	0.776214
Q99590	Protein SCAF11	SCAF11	STRNTRAETASQSQRSPISDNSGCDAPGNSN	338	-0.157976	0.460414	2.05705	3.36561e-08	1.89907	1.69245e-07	0.236406	0.0846342	0.394382	0.0229916
Q99590	Protein SCAF11	SCAF11	TSRENKRSQPRVKDSSPGEKSRSQSRERESD	902	-0.177213	0.473701	1.30828	1.59792e-06	1.13107	7.89675e-06	-0.184109	0.23174	-0.00689578	0.985753
Q99590	Protein SCAF11	SCAF11	KSKSSSFGRIDRDSYSPRWKGRWANDGWRCP	963	-0.148765	0.363564	0.326681	0.00166644	0.177916	0.0423916	0.0065221	0.953864	0.155287	0.234268
Q99590	Protein SCAF11	SCAF11	LRSSVAAPEKSSSNDSVDEETAESDTSPVLE	405	0.0044686	0.992313	1.69598	1.99195e-05	1.70045	2.84882e-05	0.114968	0.697385	0.1105	0.866492
Q99613	Eukaryotic translation initiation factor 3 subunit C;Eukaryotic translation initiation factor 3 subunit C-like protein	EIF3C;EIF3CL	DFESHITSYKQNPEQSADEDAEKNEEDSEGS	166	-0.359724	0.0467104	0.887411	2.08668e-06	0.527687	0.000128476	-0.204273	0.0680138	0.155451	0.270683
Q99613	Eukaryotic translation initiation factor 3 subunit C;Eukaryotic translation initiation factor 3 subunit C-like protein	EIF3C;EIF3CL	TKPVGGNYGKQPLLLSEDEEDTKRVVRSAKD	39	-0.187819	0.219717	1.1212	1.88262e-07	0.933383	1.35535e-06	-0.223399	0.0315581	-0.0355797	0.876691
Q99613	Eukaryotic translation initiation factor 3 subunit C;Eukaryotic translation initiation factor 3 subunit C-like protein	EIF3C;EIF3CL	KNEGYMRRGGYRQQQSQTAY___________	909	-0.78708	0.555749	0.600351	0.356142	-0.186729	0.778814	-0.729225	0.386178	0.0578545	0.978074
Q99618	Cell division cycle-associated protein 3	CDCA3	GIARTPMKTSSGDPPSPLVKQLSEVFETEDS	87	0.212066	0.591022	-0.933317	0.000525287	-0.721251	0.00317441	0.253938	0.297938	0.041872	0.959949
Q99700	Ataxin-2	ATXN2	EHKRGPEVTSQGVQTSSPACKQEKDDKEEKK	888	1.02889	0.151932	-2.67398	2.12629e-05	-1.64509	0.000826681	1.096	0.0258382	0.0671125	0.959949
Q99700	Ataxin-2	ATXN2	HKRGPEVTSQGVQTSSPACKQEKDDKEEKKD	889	0.535893	0.521902	-2.1571	0.000287487	-1.62121	0.00222144	0.734433	0.157335	0.19854	0.871923
Q99700	Ataxin-2	ATXN2	WGSGRQNSPRMGQPGSGSMPSRSTSHTSDFN	521	1.25871	0.266788	-4.52803	1.3691e-05	-3.26932	0.000191551	1.29957	0.0771873	0.0408603	0.981108
Q99700	Ataxin-2	ATXN2	SSEAKDSRLQDQRQNSPAGNKENIKPNETSP	758	1.13402	0.000399465	-1.04401	1.4576e-06	0.0900142	0.354104	1.32092	5.56178e-06	0.186895	0.227728
Q99729	Heterogeneous nuclear ribonucleoprotein A/B	HNRNPAB	KVAQPKEVYQQQQYGSGGRGNRNRGNRGSGG	242	1.51041	0.338986	-3.87099	0.000449253	-2.36058	0.010365	1.06271	0.283967	-0.447702	0.83909
Q99733	Nucleosome assembly protein 1-like 4	NAP1L4	___________MADHSFSDGVPSDSVEAAKN	5	1.47816	0.191868	-1.90801	0.0048765	-0.42985	0.448541	-0.266414	0.717708	-1.74458	0.0522779
Q99733	Nucleosome assembly protein 1-like 4	NAP1L4	_________MADHSFSDGVPSDSVEAAKNAS	7	-1.03827	0.040852	0.757573	0.00726324	-0.280694	0.250146	-0.318373	0.293952	0.719893	0.0601391
Q99741	Cell division control protein 6 homolog	CDC6	SDAKLEPTNVQTVTCSPRVKALPLSPRKRLG	45	-0.79887	0.0693182	-0.71461	0.00504988	-1.51348	4.56579e-05	0.415004	0.124986	1.21387	0.00228034
Q99959	Plakophilin-2	PKP2	ATYEGRWGRGTAQYSSQKSVEERSLRHPLRR	132	0.866562	0.0621827	-0.745913	0.00520889	0.120649	0.590145	0.427634	0.131982	-0.438928	0.221222
Q99961	Endophilin-A2	SH3GL1	GGFPCTTAPKIAASSSFRSSDKPIRTPSRSM	288	0.221776	0.609682	0.672774	0.00696247	0.89455	0.00146312	-0.158554	0.565084	-0.38033	0.274244
Q99996	A-kinase anchor protein 9	AKAP9	KLAQFRQRKAQSDGQSPSKKQKKKRKTSSSK	31	-0.0601528	0.858992	0.631698	0.00108335	0.571545	0.00236848	0.659453	0.00416854	0.719605	0.00527959
Q9BPX3	Condensin complex subunit 3	NCAPG	TKKIKTLHCEGTEINSDDEQESKEVEETATA	674	-0.152153	0.57631	0.839621	8.43115e-05	0.687467	0.000426516	0.0523944	0.767058	0.204548	0.368158
Q9BQG0	Myb-binding protein 1A	MYBBP1A	_____MESRDPAQPMSPGEATQSGARPADRY	11	0.250446	0.47761	-0.274935	0.121658	-0.024489	0.892668	0.135828	0.551704	-0.114618	0.801417
Q9BQG0	Myb-binding protein 1A	MYBBP1A	KLEKKDAKEIPSATQSPISKKRKKKGFLPET	1163	0.54956	0.0167368	0.666986	6.54487e-05	1.21655	1.64684e-06	0.414619	0.00792961	-0.13494	0.464741
Q9BQG0	Myb-binding protein 1A	MYBBP1A	QKKNQKPSQVNGAPGSPTEPAGQKQHQKALP	1267	0.677979	0.173213	0.0148335	0.9529	0.692813	0.0147202	0.50613	0.110283	-0.171849	0.781504
Q9BRD0	BUD13 homolog	BUD13	HGSSDISSPRRVHNNSPDTSRRTLGSSDTQQ	248	-0.124309	0.70616	1.22408	1.53603e-05	1.09977	4.8389e-05	-0.251168	0.202877	-0.126859	0.726429
Q9BRJ6	Uncharacterized protein C7orf50	C7orf50	VQKAEALMRELDEEGSDPPLPGRAQRIRQVL	175	-0.388949	0.38164	0.892202	0.00156948	0.503253	0.0354413	-0.40212	0.147323	-0.0131713	0.984934
Q9BRP8	Partner of Y14 and mago	WIBG	__________MEAAGSPAATETGKYIASTQR	6	-0.0341754	0.984762	-1.37086	0.0438777	-1.40503	0.0423412	0.0643288	0.941805	0.0985042	0.961424
Q9BSJ6	Protein FAM64A	FAM64A	SALGAVSQRIQESCQSGTKWLVETQVKARRR	106	1.82903	0.00945425	-5.17498	8.49264e-08	-3.34595	2.60948e-06	1.52786	0.00239593	-0.301171	0.639259
Q9BSJ6	Protein FAM64A	FAM64A	MASRWQNMGTSVRRRSLQHQEQLEDSKELQP	16	0.592557	0.057232	-1.43054	3.56521e-06	-0.837986	0.000230176	0.298104	0.117688	-0.294454	0.220358
Q9BSM1	Polycomb group RING finger protein 1	PCGF1	_____________MASPQGGQIAIAMRLRNQ	3	-0.254057	0.468312	0.159078	0.351732	-0.0949786	0.586383	-0.109379	0.632618	0.144678	0.714089
Q9BST9	Rhotekin	RTKN	RRKEAQVLGKTSRRPSDSGPPAERSPCRGRV	106	-0.245813	0.354741	0.259768	0.0601028	0.0139542	0.917759	-0.521356	0.00840076	-0.275542	0.191006
Q9BTA9	WW domain-containing adapter protein with coiled-coil	WAC	SGDHRHEKMRDAGDPSPPNKMLRRSDSPENK	53	0.466137	0.173213	0.198324	0.241388	0.664461	0.00239171	0.5154	0.0277667	0.0492636	0.93615
Q9BTA9	WW domain-containing adapter protein with coiled-coil	WAC	QQPVTADKQQGHEPVSPRSLQRSSSQRSPSP	511	-0.239042	0.448165	0.959435	9.28581e-05	0.720394	0.000826681	-0.160821	0.420794	0.0782207	0.865428
Q9BTA9	WW domain-containing adapter protein with coiled-coil	WAC	AGDPSPPNKMLRRSDSPENKYSDSTGHSKAK	64	-0.263551	0.282333	1.20796	2.95894e-06	0.944407	2.62849e-05	-0.120205	0.445706	0.143346	0.533483
Q9BTD8	RNA-binding protein 42	RBM42	VGPVGFGPGDRSHLDSPEAREAMFLRRAAVA	135	-0.418429	0.408014	-0.464816	0.0739738	-0.883245	0.00422793	-0.457214	0.147969	-0.0387853	0.961424
Q9BTE3	Mini-chromosome maintenance complex-binding protein	MCMBP	TWVKEAYVNANQARVSPSTSYTPSRHKRSYE	154	0.746489	0.244236	0.0612686	0.848583	0.807758	0.024431	-0.0211239	0.963994	-0.767613	0.13284
Q9BTU6	Phosphatidylinositol 4-kinase type 2-alpha	PI4K2A	PPVIVETARSHQRSSSESYTQSFQSRKPFFS	462	-0.0377139	0.94719	0.465078	0.0597523	0.427364	0.08374	-0.266709	0.370983	-0.228995	0.640355
Q9BU76	Multiple myeloma tumor-associated protein 2	MMTAG2	AASARRKPRAEDQTESSCESHRKSKKEKKKK	177	-0.616858	0.282705	0.943885	0.00581565	0.327027	0.262562	-0.422513	0.24135	0.194345	0.792616
Q9BUI4	DNA-directed RNA polymerase III subunit RPC3	POLR3C	LVPKLSLIGKGKRRRSSDEDAAGEPKAKRPK	204	-0.657577	0.00450093	0.922571	3.05257e-06	0.264994	0.0142884	-0.663331	0.000279146	-0.00575437	0.984781
Q9BUQ8	Probable ATP-dependent RNA helicase DDX23	DDX23	__MAGELADKKDRDASPSKEERKRSRTPDRE	14	-0.0284246	0.940988	0.986826	9.49476e-05	0.958402	0.000154901	-0.175727	0.391576	-0.147303	0.667965
Q9BUQ8	Probable ATP-dependent RNA helicase DDX23	DDX23	KDGHRRDKDRKRSSLSPGRGKDFKSRKDRDS	109	-0.513563	0.326621	2.84747	1.41424e-06	2.33391	9.56813e-06	-0.486099	0.142636	0.027464	0.973615
Q9BV73	Centrosome-associated protein CEP250	CEP250	AAQAGSLEISKATASSPTQQDGRGQKNSDAK	2332	0.150877	0.554228	-1.66541	3.88014e-07	-1.51453	1.49084e-06	0.460272	0.0126831	0.309395	0.121546
Q9BVJ6	U3 small nucleolar RNA-associated protein 14 homolog A	UTP14A	LRKRSELSQDAEPAGSQETKDSGSQEVLSEL	445	-1.20926	0.000449797	2.7958	9.02344e-09	1.58654	6.25088e-07	-1.38155	7.97778e-06	-0.172287	0.35756
Q9BVS4	Serine/threonine-protein kinase RIO2	RIOK2	SFSDGEVAEKAEVYGSENESERNCLEESEGC	350	0.0734377	0.734046	0.254042	0.0214154	0.327479	0.00643608	-0.0503165	0.701422	-0.123754	0.495791
Q9BW19	Kinesin-like protein KIFC1	KIFC1	ELKRPLIKAPSQLPLSGSRLKRRPDQMEDGL	31	1.93298	0.13214	-5.23668	1.05279e-05	-3.3037	0.000365405	1.86165	0.0305608	-0.0713316	0.973194
Q9BW19	Kinesin-like protein KIFC1	KIFC1	__________MDPQRSPLLEVKGNIELKRPL	6	0.774998	0.136631	-0.734512	0.0121414	0.0404868	0.878465	0.827775	0.0217293	0.0527765	0.959949
Q9BWE0	Replication initiator 1	REPIN1	MGLAQPRLLSGPSQESPQTLGKESRGLRQQG	27	0.809536	0.494243	-2.87452	0.000440745	-2.06498	0.00416452	0.695872	0.34552	-0.113664	0.959949
Q9BWG6	Sodium channel modifier 1	SCNM1	PQAEESATVSAPAPMSPTRRRALDHYLTLRS	183	-0.262573	0.367267	0.868133	0.000108768	0.60556	0.00150613	-0.654524	0.00396143	-0.391951	0.08409
Q9BWH2	FUN14 domain-containing protein 2	FUNDC2	EKDMKKAKEQLKIRKSNQIPTEVRSKAEEVV	151	0.24621	0.460414	-0.286577	0.0922549	-0.0403664	0.807775	-0.241353	0.243931	-0.487564	0.0625602
Q9BWT3	Poly(A) polymerase gamma	PAPOLG	SRKKRLPSKELPDSSSPVPANNIRVIKNSIR	716	-0.0929527	0.867866	-1.23925	0.000356994	-1.3322	0.000271022	0.502326	0.107164	0.595279	0.121762
Q9BX63	Fanconi anemia group J protein	BRIP1	PKATPELGSSENSASSPPRFKTEKMESKTVL	1032	0.0359177	0.946208	0.616378	0.013283	0.652296	0.0108647	0.0207152	0.946096	-0.0152025	0.981108
Q9BX63	Fanconi anemia group J protein	BRIP1	PGHCSRCCCSTKQGNSQESSNTIKKDHTGKS	226	-1.83983	0.0010851	3.0271	1.60684e-07	1.18727	0.000164217	-0.630363	0.0240427	1.20946	0.0017098
Q9BX63	Fanconi anemia group J protein	BRIP1	EEAGKAEKIVISRSTSPTFNKQTKRVSWSSF	990	-0.230381	0.223636	1.09223	9.49844e-07	0.861848	8.63794e-06	-0.315637	0.0188195	-0.0852569	0.676004
Q9BX66	Sorbin and SH3 domain-containing protein 1	SORBS1	RASSSYRETPSSSPASPQETRQHESKPGLEP	89	0.511148	0.157629	-0.0394562	0.823804	0.471692	0.019567	1.6533	4.60914e-05	1.14215	0.00115045
Q9BX95	Sphingosine-1-phosphate phosphatase 1	SGPP1	LGPASPRRAGALRRNSLTGEEGQLARVSNWP	112	-0.196929	0.518511	0.804061	0.00024554	0.607131	0.00187936	-0.194489	0.300492	0.00244064	0.997187
Q9BXB4	Oxysterol-binding protein-related protein 11	OSBPL11	TPNKNSSCGGGISSSSSSRGGSAKGWQYSDH	42	0.852419	0.13214	-3.8554	2.79605e-07	-3.00298	2.78788e-06	0.982273	0.0142821	0.129854	0.876144
Q9BXB4	Oxysterol-binding protein-related protein 11	OSBPL11	PPLKSRSFSLASSSNSPISQRRPSQNAISFF	181	-0.221346	0.373247	-0.217427	0.0862545	-0.438773	0.00396743	0.284617	0.0739656	0.505963	0.0136232
Q9BXB5	Oxysterol-binding protein-related protein 10	OSBPL10	NSSSRSSSRATSAGSSPSCSLAGRGVSSRSA	30	0.362193	0.437363	-2.06693	5.69286e-06	-1.70474	3.44493e-05	0.622144	0.0427575	0.259951	0.549296
Q9BXB5	Oxysterol-binding protein-related protein 10	OSBPL10	MERAVQGTDGGGGSNSSSRSSSRATSAGSSP	16	0.974848	0.0944231	-3.10181	1.41424e-06	-2.12696	3.17504e-05	0.71038	0.0570015	-0.264468	0.660046
Q9BXB5	Oxysterol-binding protein-related protein 10	OSBPL10	SSRSAAAGLGGGGSRSSPGSVAASPSGGGGR	56	1.48458	0.0047968	-0.32959	0.132704	1.15499	0.000316367	1.01719	0.0031929	-0.467394	0.173125
Q9BXF6	Rab11 family-interacting protein 5	RAB11FIP5	RSSWLSTEGGRDSAQSPKLFTHKRTYSDEAN	296	0.228568	0.295353	-0.552686	0.000365046	-0.324118	0.0108511	0.209257	0.131306	-0.0193119	0.960879
Q9BXK1	Krueppel-like factor 16	KLF16	APGGASPASSSSAASSPSSGRAPGAAPSAAA	109	0.9286	0.0918907	2.59282	3.37203e-06	3.52142	9.54737e-07	0.647135	0.0641034	-0.281465	0.598293
Q9BXP5	Serrate RNA effector molecule homolog	SRRT	ICWNLQNIRLRECELSPGVNRDLTRRVRNIN	493	0.376057	0.47196	-1.69744	5.83771e-05	-1.32138	0.000429731	-0.0710613	0.836616	-0.447118	0.29527
Q9BXS6	Nucleolar and spindle-associated protein 1	NUSAP1	EKQESQDLRATAKVPSPPDEHQEAENAVSSG	135	0.865653	0.400861	-2.19285	0.00108284	-1.32719	0.0201801	0.50072	0.441472	-0.364932	0.770957
Q9BXS9	Solute carrier family 26 member 6	SLC26A6	DAVTFALQHPRPVPDSPVSVTRL________	752	0.0353286	0.920785	1.00911	5.27329e-05	1.04444	5.8009e-05	-0.161317	0.404833	-0.196646	0.469161
Q9BXW9	Fanconi anemia group D2 protein	FANCD2	EEIKSQNSQESTADESEDDMSSQASKSKATE	1412	0.176679	0.337195	0.119547	0.191671	0.296226	0.00696795	-0.0710305	0.553792	-0.247709	0.0861578
Q9BY44	Eukaryotic translation initiation factor 2A;Eukaryotic translation initiation factor 2A, N-terminally processed	EIF2A	HEAKKAAKQEARSDKSPDLAPTPAPQSTPRN	506	-0.096209	0.886879	0.804239	0.0155801	0.70803	0.0299083	-0.309866	0.412484	-0.213657	0.769939
Q9BY89	Uncharacterized protein KIAA1671	KIAA1671	VETQEVNPGASRDQTSPAVKQGSPVEPKATF	1012	0.229953	0.282333	-1.61875	1.55989e-07	-1.3888	9.83305e-07	0.543745	0.0021692	0.313792	0.0633876
Q9BY89	Uncharacterized protein KIAA1671	KIAA1671	LVGQEVGSGEGPRTSSPLFNKAVFLRPSSST	128	-0.0945902	0.892704	-0.924185	0.00950208	-1.01878	0.00619101	0.292988	0.45964	0.387579	0.489685
Q9BYE7	Polycomb group RING finger protein 6	PCGF6	DMSHFSLRLEGGRQDSEDEEERLINLSELTP	115	-0.109509	0.676578	0.819918	5.58246e-05	0.710409	0.00020481	-0.0281622	0.866345	0.0813469	0.803471
Q9BYJ9	YTH domain-containing family protein 1	YTHDF1	NAAFGQSGGAGSDSNSPGNVQPNSAPSVESH	350	1.68404	0.077425	-3.8701	9.5578e-06	-2.18606	0.000697316	1.49862	0.0209488	-0.185427	0.898926
Q9BYW2	Histone-lysine N-methyltransferase SETD2	SETD2	VVVVPKNSTLPMEETSPCSSRSSQSYRHYSD	1084	0.535077	0.195163	-0.336582	0.109305	0.198495	0.33917	0.464843	0.0809496	-0.0702336	0.920117
Q9BYX2	TBC1 domain family member 2A	TBC1D2	ERRASRRRAVSEGCASEDEVEGEA_______	920	-0.458541	0.0605058	1.00248	8.21793e-06	0.543941	0.00081003	-0.350754	0.0289164	0.107787	0.665303
Q9BZ23	Pantothenate kinase 2, mitochondrial	PANK2	AVGASAEGTRRDRLGSYSGPTSVSRQRVESL	189	0.755016	0.166931	0.279153	0.298291	1.03417	0.0027883	-0.160995	0.654765	-0.916011	0.0369376
Q9BZZ5	Apoptosis inhibitor 5	API5	QKVEIGQKRASEDTTSGSPPKKSSAGPKRDA	462	-0.139264	0.418184	1.12686	3.81157e-07	0.987597	1.82502e-06	-0.0232536	0.836616	0.116011	0.437197
Q9BZZ5	Apoptosis inhibitor 5	API5	VEIGQKRASEDTTSGSPPKKSSAGPKRDARQ	464	-0.02326	0.929686	0.802794	2.92182e-05	0.779534	5.16974e-05	-0.0311443	0.833749	-0.00788422	0.981108
Q9C0B5	Palmitoyltransferase ZDHHC5	ZDHHC5	AAMPHSSSAKLSRGDSLKEPTSIAESSRHPS	380	-0.128615	0.460414	0.599932	3.75217e-05	0.471316	0.000274997	-0.13167	0.22584	-0.00305421	0.991687
Q9C0B5	Palmitoyltransferase ZDHHC5	ZDHHC5	SLGSASPGPGQPPLSSPTRGGVKKVSGVGGT	694	0.343564	0.134933	2.22869	3.09202e-08	2.57225	5.03238e-08	0.310492	0.0404686	-0.0330718	0.934321
Q9C0C2	182 kDa tankyrase-1-binding protein	TNKS1BP1	ETTQARTEAQDLCRASPEPPGPESSSRWLDD	672	-0.161079	0.555749	0.61618	0.000770273	0.455102	0.00566732	-0.0536077	0.762962	0.107471	0.734693
Q9C0C2	182 kDa tankyrase-1-binding protein	TNKS1BP1	VKSKDLAEVGEGGGHSQARESGVGQTDWSGV	1248	-0.153492	0.783675	-1.50051	0.000121545	-1.65401	8.22845e-05	0.182921	0.578775	0.336412	0.453185
Q9C0C2	182 kDa tankyrase-1-binding protein	TNKS1BP1	SRDVSLGDWEFGKRDSLGAYASQDANEQGQD	893	-0.141866	0.528687	0.0548707	0.611719	-0.0869949	0.433316	-0.0790949	0.582396	0.0627707	0.839432
Q9C0C2	182 kDa tankyrase-1-binding protein	TNKS1BP1	PTSLVQRRFSEGVLQSPSQDQEKLGGSLAAL	435	-0.226737	0.745182	-1.34799	0.00122106	-1.57473	0.000523286	0.120249	0.774405	0.346985	0.567928
Q9C0C2	182 kDa tankyrase-1-binding protein	TNKS1BP1	EILAKMEQPRKEVLASPDRLWGSRLTFNHDG	178	0.429396	0.0708082	-0.455205	0.00187506	-0.0258094	0.823462	0.496604	0.00515306	0.0672081	0.833068
Q9C0C2	182 kDa tankyrase-1-binding protein	TNKS1BP1	SQEADVQDWEFRKRDSQGTYSSRDAELQDQE	851	0.16278	0.57631	-0.547498	0.00238972	-0.384718	0.0179688	0.0929018	0.623615	-0.0698783	0.871292
Q9C0C2	182 kDa tankyrase-1-binding protein	TNKS1BP1	DQLGLRNLEVSSCVGSGGSSEARESAVGQMG	1178	0.406964	0.491505	-1.98342	4.40823e-05	-1.57646	0.00029216	0.38121	0.297938	-0.0257545	0.978074
Q9C0C2	182 kDa tankyrase-1-binding protein	TNKS1BP1	TPDLGLRNMAPGAVCSPGESKELGVGQMDWG	1297	0.805069	0.439612	-2.20414	0.0011557	-1.39907	0.0169345	1.0126	0.122925	0.207527	0.898926
Q9C0C2	182 kDa tankyrase-1-binding protein	TNKS1BP1	LSPSALKAKLRPRNRSAEEGELAESKSSQKE	1666	0.15684	0.410614	0.764843	1.20963e-05	0.921683	5.18774e-06	-0.41855	0.00440912	-0.57539	0.00154801
Q9C0C2	182 kDa tankyrase-1-binding protein	TNKS1BP1	PRNRSAEEGELAESKSSQKESAVQRSKSCKV	1677	-0.287446	0.297926	-2.1876	1.23141e-07	-2.47505	1.69245e-07	0.458837	0.0189516	0.746282	0.0029691
Q9C0C2	182 kDa tankyrase-1-binding protein	TNKS1BP1	QFGIIGNDRVSGAGFSPSSKMEGGHFVPPGK	1138	0.821322	0.00156539	-1.06779	1.32064e-06	-0.246468	0.0229031	1.22435	7.27438e-06	0.403025	0.0129795
Q9C0C2	182 kDa tankyrase-1-binding protein	TNKS1BP1	AEERYESQEPLAGQESPLPLATREAALPILE	601	0.330599	0.245327	-1.07379	2.13448e-05	-0.74319	0.000380076	0.285537	0.117719	-0.0450622	0.928082
Q9C0C7	Activating molecule in BECN1-regulated autophagy protein 1	AMBRA1	GQTPSSSRLELSSSASPQEERTVGVAFNQET	639	0.223023	0.689126	-1.37654	0.00030061	-1.15352	0.00117207	0.402856	0.225421	0.179834	0.788054
Q9C0C9	E2/E3 hybrid ubiquitin-protein ligase UBE2O	UBE2O	KKVKRLLKKQVVRIMSCSPDTQCSRDHSMED	399	-0.416126	0.312837	-1.09404	0.00026376	-1.51017	3.68215e-05	0.188504	0.475809	0.60463	0.0631697
Q9C0C9	E2/E3 hybrid ubiquitin-protein ligase UBE2O	UBE2O	VKRLLKKQVVRIMSCSPDTQCSRDHSMEDPD	401	-0.603969	0.150242	-0.890304	0.00115086	-1.49427	4.30301e-05	0.0645865	0.817368	0.668556	0.0443687
Q9C0C9	E2/E3 hybrid ubiquitin-protein ligase UBE2O	UBE2O	IAWECPEKNCAQGEGSMAKKVKRLLKKQVVR	381	0.0413649	0.9758	-1.09326	0.0380359	-1.05189	0.0470066	0.0455124	0.946312	0.00414751	0.999727
Q9C0D5	Protein TANC1	TANC1	NGSMKVQISSQNPPPSPMPGRIAATPAGSRT	1564	-0.512324	0.57631	-1.12674	0.0236525	-1.63907	0.00369822	-0.0866164	0.888039	0.425708	0.657563
Q9C0E2	Exportin-4	XPO4	RLHGQLQRHQQQLLASPGSSTVDNKMLDDLY	521	0.577167	0.0888256	-1.11737	4.5764e-05	-0.540207	0.00649474	0.523826	0.0230275	-0.053341	0.923919
Q9GZS1	DNA-directed RNA polymerase I subunit RPA49	POLR1E	SQRAVLVQFSNGKLQSPGNMRFTLYENKDST	35	1.94843	0.000634824	-4.28388	1.89073e-08	-2.33545	1.45156e-06	1.38985	0.000241668	-0.558581	0.0670174
Q9GZT9	Egl nine homolog 1	EGLN1	____MANDSGGPGGPSPSERDRQYCELCGKM	12	0.433879	0.690364	-0.285935	0.571756	0.147944	0.775572	0.312641	0.646919	-0.121238	0.955413
Q9H063	Repressor of RNA polymerase III transcription MAF1 homolog	MAF1	SPPQTSGLSPSRLSKSQGGEEEGPLSDKCSR	75	-0.657847	0.19571	2.50843	2.81068e-06	1.85059	3.79628e-05	-0.65664	0.0497016	0.00120624	0.999997
Q9H074	Polyadenylate-binding protein-interacting protein 1	PAIP1	PRTTPPPGAQCEVPASPQRPSRPGALPEQTR	77	0.176985	0.794015	-1.27138	0.00136342	-1.09439	0.00389866	0.178465	0.659265	0.00148064	0.999997
Q9H079	KATNB1-like protein 1	KATNBL1	TYLVNSSDSGSSQTESPSSKYSGFFSEVSQD	135	0.816669	0.0070626	-2.81936	1.89073e-08	-2.0027	3.73885e-07	1.32506	2.38398e-05	0.508391	0.0162483
Q9H0B6	Kinesin light chain 2	KLC2	QPGGTGLSDSRTLSSSSMDLSRRSSLVG___	610	-0.789475	0.109588	-0.151011	0.524311	-0.940487	0.00246665	-0.196004	0.533078	0.593471	0.121546
Q9H0D6	5'-3' exoribonuclease 2	XRN2	TPSGILTPHALGSRNSPGSQVASNPRQAAYE	448	0.754202	0.00459879	-1.31206	7.01032e-07	-0.557862	0.000412017	0.909778	8.86131e-05	0.155575	0.402347
Q9H0G5	Nuclear speckle splicing regulatory protein 1	NSRP1	VGVQSSERNQDRKESSPNSRAKDKFLDQERS	457	0.00448821	0.986278	1.01645	2.1419e-06	1.02094	3.66092e-06	-0.103908	0.411723	-0.108396	0.566786
Q9H0H5	Rac GTPase-activating protein 1	RACGAP1	EEQKSALAFLNRGQPSSSNAGNKRLSTIDES	134	0.880837	0.21634	-2.59658	2.62998e-05	-1.71575	0.000624723	0.587781	0.192109	-0.293055	0.719998
Q9H0H5	Rac GTPase-activating protein 1	RACGAP1	EQKSALAFLNRGQPSSSNAGNKRLSTIDESG	135	0.734709	0.316547	-2.81963	1.77162e-05	-2.08492	0.000208798	0.291947	0.539804	-0.442763	0.511179
Q9H0L4	Cleavage stimulation factor subunit 2 tau variant	CSTF2T	IQGASKQGGSQPSSFSPGQSQVTPQDQEKAA	563	0.37434	0.0434818	-1.06507	7.01032e-07	-0.690732	2.31014e-05	0.344841	0.00892904	-0.0294989	0.921217
Q9H1B7	Interferon regulatory factor 2-binding protein-like	IRF2BPL	SVAEVGVGAGGKRPGSVSSTDQERELKEKQR	334	-0.0270674	0.938751	0.584136	0.00174033	0.557068	0.00268444	-0.787006	0.00154901	-0.759938	0.00373712
Q9H1E3	Nuclear ubiquitous casein and cyclin-dependent kinase substrate 1	NUCKS1	EKKMPKPRLKATVTPSPVKGKGKVGRPTASK	181	-0.407409	0.6543	3.34467	1.86174e-05	2.93726	6.75775e-05	-0.902175	0.107164	-0.494766	0.548753
Q9H1E3	Nuclear ubiquitous casein and cyclin-dependent kinase substrate 1	NUCKS1	PVRNRKVVDYSQFQESDDADEDYGRDSGPPT	19	-0.293574	0.362983	0.944504	0.000121687	0.65093	0.00179091	-0.299416	0.138838	-0.00584198	0.991687
Q9H1E3	Nuclear ubiquitous casein and cyclin-dependent kinase substrate 1	NUCKS1	EAKNKRRSGKNSQEDSEDSEDKDVKTKKDDS	58	-0.258325	0.452216	1.4033	1.09745e-05	1.14497	6.7022e-05	-0.139103	0.529011	0.119222	0.781382
Q9H1E3	Nuclear ubiquitous casein and cyclin-dependent kinase substrate 1	NUCKS1	KTSTSPPPEKSGDEGSEDEAPSGED______	234	-0.873336	0.0420795	-0.458286	0.0364616	-1.33162	8.23045e-05	0.00277019	0.992315	0.876106	0.0107525
Q9H1H9	Kinesin-like protein KIF13A	KIF13A	IIVVPLKENSALAKGSPSSQSIPEKNSKSLC	1679	0.964784	0.39922	-2.74168	0.000488801	-1.7769	0.00797876	1.00922	0.157019	0.0444392	0.979244
Q9H211	DNA replication factor Cdt1	CDT1	PSPARPALRAPASATSGSRKRARPPAAPGRD	45	0.433525	0.191868	-0.578665	0.00404466	-0.14514	0.384821	0.501667	0.0276427	0.068142	0.896528
Q9H2D6	TRIO and F-actin-binding protein	TRIOBP	RLAKQEELERDLAQRSEERRKWFEATDSRTP	1983	0.312575	0.824226	-1.51602	0.0275155	-1.20344	0.0712951	0.334035	0.689325	0.0214601	0.991687
Q9H2G2	STE20-like serine/threonine-protein kinase	SLK	NLSISSFLSKTKDSGSISLQETRRQKKTLKK	779	-0.639647	0.133891	-0.887293	0.00126483	-1.52694	3.99867e-05	-0.40725	0.128032	0.232397	0.560513
Q9H2G2	STE20-like serine/threonine-protein kinase	SLK	DVAQKVDEDSAEDTQSNDGKEVVEVGQKLIN	571	-0.396966	0.0525614	0.995652	2.3161e-06	0.598686	0.000129997	0.0549881	0.670509	0.451954	0.0075138
Q9H2H9	Sodium-coupled neutral amino acid transporter 1	SLC38A1	GQINSKFISDRESRRSLTNSHLEKKKCDEYI	52	0.0625148	0.880347	1.48684	1.17997e-05	1.54935	1.32007e-05	-0.661455	0.0129517	-0.72397	0.0162483
Q9H2M9	Rab3 GTPase-activating protein non-catalytic subunit	RAB3GAP2	TVEDLHERVPEKADFSPFGNSQGPSRVAQFL	450	0.721035	0.452705	-3.20575	4.73591e-05	-2.48472	0.000370182	0.665717	0.264905	-0.0553187	0.971617
Q9H2P0	Activity-dependent neuroprotector homeobox protein	ADNP	SKFFSAYKSHFRNVHSEDFENRILLNCPYCT	98	0.294135	0.687368	-2.4799	2.94004e-05	-2.18576	0.00010246	0.266075	0.55491	-0.0280594	0.979244
Q9H2Y7	Zinc finger protein 106	ZNF106	SEEGTGKENEPQQMVSPSNSLRAGQSQKATM	893	0.806996	0.109817	-0.397785	0.116596	0.409211	0.113019	0.851003	0.016402	0.0440078	0.960879
Q9H2Y7	Zinc finger protein 106	ZNF106	LKFSVEQRNTRNRENSPSSQSAGLSSINKEG	1279	-0.0660572	0.7761	0.804825	1.82646e-05	0.738768	4.90325e-05	-0.0439528	0.747819	0.0221044	0.959949
Q9H307	Pinin	PNN	DRKHRRSVDRKRRDTSGLERSHKSSKGGSSR	658	-0.386112	0.131007	-0.0361611	0.769661	-0.422273	0.0056574	-0.41182	0.020239	-0.0257085	0.959949
Q9H307	Pinin	PNN	RLGGERRTRRESRQESDPEDDDVKKPALQSS	100	-0.549017	0.0291927	1.28586	1.38979e-06	0.73684	0.000109656	-0.318407	0.0420592	0.23061	0.221923
Q9H307	Pinin	PNN	GGGRGRGSLLLRRGFSDSGGGPPAKQRDLEG	66	-0.300062	0.532837	1.1683	0.000440574	0.868241	0.00342937	-0.706718	0.0289711	-0.406655	0.297156
Q9H307	Pinin	PNN	GSKDKNSRSDRKRSISESSRSGKRSSRSERD	692	0.204963	0.608453	1.35558	3.79052e-05	1.56054	1.99563e-05	-0.121688	0.636613	-0.326651	0.311137
Q9H3H1	tRNA dimethylallyltransferase, mitochondrial	TRIT1	QSVSPDHNKEPKEKGSPGQNDQELKCSV___	455	0.264363	0.540711	-0.266679	0.207978	-0.00231588	0.991908	0.546289	0.0513404	0.281926	0.45355
Q9H3N1	Thioredoxin-related transmembrane protein 1	TMX1	LKKVEEEQEADEEDVSEEEAESKEGTNKDFP	247	-0.272663	0.298308	1.35506	2.03843e-06	1.0824	1.58381e-05	-0.280806	0.0959463	-0.00814355	0.984541
Q9H3Q1	Cdc42 effector protein 4	CDC42EP4	DTSFLNSKAGEPDGESLDEQPSSSSSKRSLL	64	-0.372757	0.109817	-0.21685	0.0703107	-0.589607	0.000410038	-0.309378	0.0430318	0.0633795	0.847473
Q9H3Q1	Cdc42 effector protein 4	CDC42EP4	LGSLRDSALFVKNAMSLPQLNEKEAAEKGTS	118	-0.360727	0.57631	-0.564187	0.0871223	-0.924915	0.0123934	0.372998	0.356787	0.733726	0.146527
Q9H4A3	Serine/threonine-protein kinase WNK1	WNK1	SLVGSKEEPPPARSGSGGGSAKEPQEERSQQ	185	-0.116301	0.531175	0.696439	1.88029e-05	0.580138	9.94736e-05	0.142397	0.215835	0.258698	0.0716204
Q9H4A3	Serine/threonine-protein kinase WNK1	WNK1	RRPTKSKGSKSSRSSSLGNKSPQLSGNLSGQ	2140	0.0751179	0.927205	1.99044	0.00014374	2.06556	0.000145725	-0.0986523	0.830676	-0.17377	0.865428
Q9H4G0	Band 4.1-like protein 1	EPB41L1	GTPEKANERAGLREGSEEKVKPPRPRAPESD	564	1.62961	2.24643e-05	-2.61581	2.90946e-09	-0.986205	9.518e-07	1.30027	1.67729e-06	-0.32934	0.00984474
Q9H4G0	Band 4.1-like protein 1	EPB41L1	GSEEKVKPPRPRAPESDTGDEDQDQERDTVF	578	0.156101	0.773316	0.514424	0.048298	0.670525	0.016385	0.149753	0.643739	-0.00634725	0.993602
Q9H4H8	Protein FAM83D	FAM83D	DENILFPRGTQSTEGSPVSKMSVSRSSSLKS	462	1.24178	0.00182434	0.874938	0.00014967	2.11672	6.72723e-07	1.249	9.88983e-05	0.00721874	0.98888
Q9H4I2	Zinc fingers and homeoboxes protein 3	ZHX3	EPRVPEASSEPFDTSSPQAGRQLETD_____	946	0.00447774	0.988528	0.0547167	0.661919	0.0591945	0.644338	0.147306	0.363494	0.142828	0.553493
Q9H4L4	Sentrin-specific protease 3	SENP3	KPRLKSGGGFGPDPGSGTTVPARRLPVPRPS	54	0.254075	0.8112	-3.42076	2.88464e-05	-3.16668	7.06212e-05	0.327667	0.597294	0.0735917	0.961424
Q9H4Z3	Phosphorylated CTD-interacting factor 1	PCIF1	VETPPAENKPRKRQLSEEQPSGNGVKKPKIE	116	-0.159196	0.867873	0.227956	0.579429	0.0687598	0.874558	-0.245448	0.659265	-0.0862516	0.959949
Q9H501	ESF1 homolog	ESF1	KKMKTSCKFKIDSNISPKKDSKEFTQKNKKE	153	-0.154341	0.510275	1.25757	1.40057e-06	1.10323	6.0513e-06	-0.109496	0.458302	0.0448451	0.905058
Q9H6E5	Speckle targeted PIP5K1A-regulated poly(A) polymerase	TUT1	EALGCHIEQATKRTRSEGGGTGESSQGGTSK	644	0.0167096	0.986278	-1.96195	0.000247624	-1.94524	0.000328005	-0.717528	0.123023	-0.734238	0.212792
Q9H6F5	Coiled-coil domain-containing protein 86	CCDC86	LVEFESNPEETREPGSPPSVQRAGLGSPERP	47	-0.26925	0.509989	0.840987	0.00129678	0.571737	0.0132371	-0.0997506	0.704966	0.169499	0.708139
Q9H6F5	Coiled-coil domain-containing protein 86	CCDC86	TPLRRSRRLGGLRPESPESLTSVSRTRRALV	18	-0.111807	0.578965	1.43066	2.16697e-07	1.31885	9.2069e-07	-0.271366	0.0411718	-0.159559	0.336333
Q9H6F5	Coiled-coil domain-containing protein 86	CCDC86	AGLESPQGQPEPGAASPQRQQDLHLESPQRQ	91	-1.60608	0.129582	3.11495	0.000113838	1.50887	0.0123477	-1.51534	0.0320909	0.090746	0.960941
Q9H6F5	Coiled-coil domain-containing protein 86	CCDC86	LHLESPQRQPEYSPESPRCQPKPSEEAPKCS	113	-1.32088	0.1073	4.0693	2.42444e-06	2.74843	6.06478e-05	-1.72566	0.00541498	-0.404786	0.624127
Q9H6R4	Nucleolar protein 6	NOL6	LPTKNNVRSAWYRGQSPAGDGSPEPPTPRYN	283	0.61519	0.0470511	-0.97001	5.74718e-05	-0.354821	0.029538	0.0874301	0.654765	-0.52776	0.028062
Q9H6R4	Nucleolar protein 6	NOL6	VRSAWYRGQSPAGDGSPEPPTPRYNTWVLQD	289	0.835917	0.124103	-0.963594	0.00330984	-0.127677	0.633389	0.424666	0.208075	-0.411251	0.358792
Q9H6S0	Probable ATP-dependent RNA helicase YTHDC2	YTHDC2	SPRQPAPGGGGGGGPSPCGPGGGGRAKGLKD	23	1.60069	0.0472662	-3.58128	4.3851e-06	-1.98059	0.000408933	1.6102	0.00625681	0.00951419	0.993697
Q9H6S3	Epidermal growth factor receptor kinase substrate 8-like protein 2	EPS8L2	PQGPAPIPFQHRGGDSPEAKNRVGPQVPLSE	217	0.502671	0.0102015	-0.564593	5.70328e-05	-0.0619219	0.47343	0.824153	3.75934e-05	0.321482	0.0221288
Q9H6Y2	WD repeat-containing protein 55	WDR55	__MDRTCEERPAEDGSDEEDPDSMEAPTRIR	14	-0.180223	0.261307	1.08135	3.38243e-07	0.901131	2.18117e-06	-0.0288004	0.78889	0.151423	0.244759
Q9H6Z4	Ran-binding protein 3	RANBP3	EDGNYCPPVKRERTSSLTQFPPSQSEERSSG	126	-0.346375	0.315634	0.567272	0.0056819	0.220897	0.208198	-0.658887	0.00986243	-0.312512	0.268109
Q9H7D0	Dedicator of cytokinesis protein 5	DOCK5	REAKAPPPPPPKARKSGIPTSEPGSQ_____	1860	0.455319	0.335344	-1.54188	5.87398e-05	-1.08656	0.000833056	0.410883	0.166682	-0.0444365	0.959949
Q9H7N4	Splicing factor, arginine/serine-rich 19	SCAF1	TKGKTKPSKTRKKVRSGGGSGGSGGQVSLKK	929	0.196604	0.447344	-0.247607	0.0642738	-0.0510027	0.690805	-0.479426	0.0108242	-0.67603	0.00337174
Q9H8G2	Caspase activity and apoptosis inhibitor 1	CAAP1	EKKILKILEGDNGMDSDMEEEADDGSKMGSD	203	-0.341141	0.0478363	1.26953	1.4047e-07	0.928388	2.10169e-06	-0.18174	0.0871109	0.159401	0.228395
Q9H8G2	Caspase activity and apoptosis inhibitor 1	CAAP1	WGGSSVERSERRKRRSTDSSSVSGSLQQETK	89	0.40564	0.13214	-1.38144	1.91125e-06	-0.975803	3.57612e-05	0.391392	0.0302945	-0.0142479	0.973615
Q9H8Y5	Ankyrin repeat and zinc finger domain-containing protein 1	ANKZF1	GTAQGLRDARGGPSHSAGANLRRYNEATLYK	258	0.307497	0.520311	-1.11606	0.000563368	-0.808563	0.00487868	0.254089	0.394838	-0.0534088	0.956736
Q9H8Y5	Ankyrin repeat and zinc finger domain-containing protein 1	ANKZF1	ARAPRTSCSGSGERESPERKLLQGPMDISEK	56	0.0415122	0.842328	1.05716	1.04276e-06	1.09867	1.58858e-06	0.0759803	0.52807	0.0344682	0.910498
Q9H8Y8	Golgi reassembly-stacking protein 2	GORASP2	SEKPVSAAVDANASESP______________	451	-0.292225	0.729916	-1.04129	0.017419	-1.33352	0.00525224	0.00587064	0.991685	0.298095	0.747483
Q9H910	Hematological and neurological expressed 1-like protein	HN1L	RAMKPPGGESSNLFGSPEEATPSSRPNRMAS	30	0.525546	0.135581	-2.46892	2.35756e-07	-1.94338	2.22332e-06	0.412568	0.0677831	-0.112978	0.804428
Q9H910	Hematological and neurological expressed 1-like protein	HN1L	AARSIPAGAEPGEKGSARKAGPAKEQEPMPT	144	0.718143	0.299777	-3.76052	1.4576e-06	-3.04238	1.08922e-05	0.725546	0.102994	0.00740294	0.994778
Q9H910	Hematological and neurological expressed 1-like protein	HN1L	QHLNPPGGKTSDIFGSPVTATSRLAHPNKPK	97	1.65734	0.238472	-4.06483	0.000144837	-2.40748	0.00504663	1.70977	0.0619168	0.0524303	0.981013
Q9H9E3	Conserved oligomeric Golgi complex subunit 4	COG4	__________MADLDSPPKLSGVQQPSEGVG	6	0.333134	0.146328	-0.290749	0.0207539	0.0423847	0.709034	0.136043	0.34458	-0.197091	0.292629
Q9HAN9	Nicotinamide/nicotinic acid mononucleotide adenylyltransferase 1	NMNAT1	HQEKLEASDCDHQQNSPTLERPGRKRKWTET	117	0.199667	0.567669	0.0482057	0.776601	0.247873	0.162461	0.358935	0.105247	0.159268	0.664311
Q9HAP2	MLX-interacting protein	MLXIP	QDPLGKGEQVPLHGGSPQVTVTGPSRDCPNS	669	0.820128	0.239614	-3.67883	1.7312e-06	-2.8587	1.67613e-05	1.23205	0.0141343	0.411919	0.52546
Q9HC35	Echinoderm microtubule-associated protein-like 4	EML4	KEQAKATLLEDQQDPSPSS____________	978	0.68498	0.343346	-1.8133	0.000376925	-1.12832	0.00812449	0.111191	0.817673	-0.573788	0.337098
Q9HC35	Echinoderm microtubule-associated protein-like 4	EML4	QGQREKKEESHSNDQSPQIRASPSPQPSSQP	138	0.247013	0.546605	-1.17114	0.000144105	-0.924127	0.000885227	0.568339	0.0370691	0.321326	0.340794
Q9HC52	Chromobox protein homolog 8	CBX8	RSDSARGIRIPYPGRSPQDLASTSRAREGLR	110	0.111422	0.770673	-0.808989	0.00065221	-0.697567	0.00199259	-0.00993532	0.968698	-0.121358	0.781382
Q9HC52	Chromobox protein homolog 8	CBX8	ASTSRAREGLRNMGLSPPASSTSTSSTCRAE	130	0.699788	0.127859	-1.85292	1.12446e-05	-1.15313	0.000425501	0.622941	0.0397379	-0.0768471	0.920117
Q9HC52	Chromobox protein homolog 8	CBX8	LARRQDSDLVQCGVTSPSSAEATGKLAVDTF	265	0.153472	0.858992	-0.934081	0.0238807	-0.78061	0.0529143	0.0939047	0.850518	-0.0595668	0.961424
Q9HC52	Chromobox protein homolog 8	CBX8	RERERGTSRVDDKPSSPGDSSKKRGPKPRKE	191	-0.140801	0.532718	1.73306	1.35129e-07	1.59226	6.07296e-07	-0.194093	0.166485	-0.053292	0.871923
Q9HCD5	Nuclear receptor coactivator 5	NCOA5	_______MNTAPSRPSPTRRDPYGFGDSRDS	9	0.116804	0.865413	0.834766	0.0142134	0.95157	0.00787034	-0.346599	0.364034	-0.463403	0.359367
Q9HCD6	Protein TANC2	TANC2	GSHQVFDFRSSSSVGSPTRQTYQSTSPALSP	1476	0.501057	0.0119436	0.322336	0.0030725	0.823393	7.2013e-06	0.493635	0.00125895	-0.00742185	0.978973
Q9HCG8	Pre-mRNA-splicing factor CWC22 homolog	CWC22	NKHGDPKKKRGERRNSFSENEKHTHRIKDSE	829	-0.195583	0.279005	1.05607	8.75387e-07	0.860487	6.36719e-06	-0.31192	0.0158432	-0.116337	0.471412
Q9HCN4	GPN-loop GTPase 1	GPN1	ILTRGTLDEEDEEADSDTDDIDHRVTEESHE	338	-0.16928	0.382881	1.07185	1.17515e-06	0.902574	6.69479e-06	-0.361081	0.0105826	-0.191801	0.212885
Q9HCS5	Band 4.1-like protein 4A	EPB41L4A	APSPVKSFKKAKNENSPDTQRSKSHAPWEEN	402	-0.155515	0.380102	1.06089	6.68862e-07	0.905371	3.52964e-06	-0.590609	0.000362721	-0.435094	0.00482311
Q9HD15	Steroid receptor RNA activator 1	SRA1	RRSLLTKRVAAPQDGSPRVPASETSPGPPPM	48	-0.194484	0.667781	-1.26602	0.00013021	-1.4605	6.37382e-05	-0.00766927	0.980093	0.186814	0.696096
Q9NP64	Nucleolar protein of 40 kDa	ZCCHC17	DPNNVIIEQEERRRRSFQDYTGQKITLEAVL	114	0.233296	0.736898	-2.29809	2.93671e-05	-2.06479	8.98716e-05	0.481001	0.23146	0.247705	0.745387
Q9NPD8	Ubiquitin-conjugating enzyme E2 T	UBE2T	MLDNLPEAGDSRVHNSTQKRKASQLVGIEKK	177	0.629977	0.635959	-2.30426	0.00336578	-1.67428	0.020047	0.169006	0.842529	-0.460971	0.770478
Q9NQ29	Putative RNA-binding protein Luc7-like 1	LUC7L	SGRSERGPPDWRLESSNGKMASRRSEEKEAG	354	-0.439935	0.274138	-0.535314	0.0174196	-0.975249	0.000610352	-0.336999	0.186395	0.102935	0.865045
Q9NQ55	Suppressor of SWI4 1 homolog	PPAN	RKKSLEGMKKARVGGSDEEASGIPSRTASLE	359	-0.605097	0.048457	1.16317	1.44231e-05	0.558071	0.00276918	-0.272587	0.143548	0.332509	0.152849
Q9NQA3	WAS protein family homolog 6	WASH6P	PVGQGARQDDGSSSASPSVQGAPREVVDPSG	327	1.02555	0.00115209	-3.3256	4.37601e-09	-2.30005	9.58815e-08	1.05472	4.60914e-05	0.029173	0.948931
Q9NQC3	Reticulon-4	RTN4	_MEDLDQSPLVSSSDSPPRPQPAFKYQFVRE	15	-0.225015	0.466173	1.46434	3.61632e-06	1.23933	1.8303e-05	-0.0402263	0.843636	0.184789	0.513479
Q9NQS1	Cell death regulator Aven	AVEN	SVAAGCPVLLGKDNPSPGPSRDSQKPTSPLQ	261	1.09357	0.0588745	-2.86636	2.05421e-06	-1.7728	9.66146e-05	1.21962	0.00464461	0.126054	0.87967
Q9NQS7	Inner centromere protein	INCENP	EAKTDQADGPREPPQSARRKRSYKQAVSELD	446	-0.00910168	0.988528	-1.62956	6.54406e-05	-1.63867	8.69893e-05	0.058634	0.862511	0.0677357	0.944966
Q9NQS7	Inner centromere protein	INCENP	VGTGRSASKLRIAQVSPGPRDSPAFPDSPWR	263	0.986793	0.150242	2.5134	2.37435e-05	3.50019	3.68224e-06	0.896513	0.0468714	-0.0902801	0.945365
Q9NQS7	Inner centromere protein	INCENP	TEIANSTPNPKPAASSPETPSAGQQEAKTDQ	421	1.64949	0.0319067	0.958184	0.0176763	2.60767	4.1784e-05	1.49292	0.00670883	-0.156568	0.890245
Q9NQS7	Inner centromere protein	INCENP	LEDEELQPPRSKTPSSPCPASKVVRPLRTFL	481	0.0665194	0.826603	0.801808	0.000124348	0.868327	9.54896e-05	0.372655	0.0400556	0.306135	0.153783
Q9NQW6	Actin-binding protein anillin	ANLN	RARQPLSEASNQQPLSGGEEKSCTKPSPSKK	54	-0.677286	0.0885394	0.0326774	0.864688	-0.644608	0.00585324	0.179983	0.468171	0.857269	0.0092151
Q9NQW6	Actin-binding protein anillin	ANLN	LNKLKNEGPQRKNKASPQSEFMPSKGSVTLS	792	-0.1429	0.67844	0.332674	0.0537914	0.189775	0.251969	-0.055368	0.800601	0.0875317	0.856852
Q9NQW6	Actin-binding protein anillin	ANLN	EEKSCTKPSPSKKRCSDNTEVEVSNLENKQP	72	-0.27658	0.767378	-1.21598	0.0123949	-1.49256	0.0045088	-0.124627	0.827752	0.151953	0.914989
Q9NQW6	Actin-binding protein anillin	ANLN	TVPSKGELSREICLQSQSKDKSTTPGGTGIK	356	0.584235	0.715857	-3.62599	0.000522533	-3.04175	0.00192001	0.893519	0.349053	0.309284	0.896551
Q9NQW6	Actin-binding protein anillin	ANLN	GMRRGLNSRLEATAASSVKTRMQKLAEQRRR	140	0.472718	0.756093	-3.52603	0.000385957	-3.05331	0.00119953	0.692272	0.440825	0.219554	0.928327
Q9NQW6	Actin-binding protein anillin	ANLN	VTEKVTENQIPAKNSSTEPKGFTECEMTKSS	503	1.00483	0.363564	-3.63389	5.28181e-05	-2.62906	0.000642101	1.08986	0.118296	0.0850276	0.961424
Q9NQW6	Actin-binding protein anillin	ANLN	CSWEDDVNHSFAKQNSVQEQPGTACLSKFSS	225	0.795487	0.0655975	-0.228341	0.268549	0.567146	0.0168299	-0.0746597	0.789123	-0.870147	0.0128789
Q9NQW6	Actin-binding protein anillin	ANLN	QSTPLKKHQGVSKTQSLPVTEKVTENQIPAK	485	1.05781	0.0627028	-1.28536	0.000606982	-0.227556	0.406933	0.50679	0.144335	-0.551017	0.20997
Q9NR19	Acetyl-coenzyme A synthetase, cytoplasmic	ACSS2	HLGRAELGMGDSTSQSPPIKRSCPDVQISWN	267	0.755524	0.00816108	-1.1446	4.1971e-06	-0.389075	0.00759702	1.10196	5.36445e-05	0.346439	0.0721616
Q9NR30	Nucleolar RNA helicase 2	DDX21	KQVKKKAEPSEVDMNSPKSKKAKKKEEPSQN	71	0.484524	0.0950745	0.123633	0.374204	0.608157	0.00131869	0.435138	0.0261517	-0.0493861	0.917348
Q9NR30	Nucleolar RNA helicase 2	DDX21	SKKAKKKEEPSQNDISPKTKSLRKKKEPIEK	89	0.675273	0.0189016	-0.0409402	0.748745	0.634333	0.000590048	0.530525	0.00727869	-0.144748	0.558315
Q9NRG0	Chromatin accessibility complex protein 1	CHRAC1	EEKREEDEENDNDNESDHDEADS________	124	0.23976	0.707867	0.970183	0.00652517	1.20994	0.00201933	-0.26247	0.501352	-0.502231	0.313735
Q9NRH2	SNF-related serine/threonine-protein kinase	SNRK	LDKDSGFTYSWHRRDSSEGPPGSEGDGGGQS	569	-0.279186	0.437363	1.01142	0.000161667	0.732237	0.00168571	-0.32818	0.14523	-0.0489936	0.940888
Q9NRH2	SNF-related serine/threonine-protein kinase	SNRK	ILREKQEKEIQTRSASPSNIKAQFRQSWPTK	351	0.100106	0.483842	0.159175	0.0363101	0.259281	0.00342987	0.301161	0.00562574	0.201055	0.0708999
Q9NRL2	Bromodomain adjacent to zinc finger domain protein 1A	BAZ1A	DKPQPDSKPTYSRGRSSNAYDPSQMCAEKQL	960	0.580586	0.424434	-3.23426	5.67789e-06	-2.65368	3.57319e-05	0.812651	0.0813871	0.232065	0.805538
Q9NRL2	Bromodomain adjacent to zinc finger domain protein 1A	BAZ1A	KPQPDSKPTYSRGRSSNAYDPSQMCAEKQLE	961	0.864143	0.129879	-3.27852	8.75387e-07	-2.41437	1.21539e-05	1.08901	0.0092571	0.224872	0.732699
Q9NRL2	Bromodomain adjacent to zinc finger domain protein 1A	BAZ1A	QSRSVNIASKLSLQESESKRRCRKRQSPEPS	1402	0.707237	0.21634	-3.20174	1.16453e-06	-2.4945	1.11542e-05	1.11632	0.00892904	0.409084	0.402347
Q9NRX4	14 kDa phosphohistidine phosphatase	PHPT1	GVFKYVLIRVHSAPRSGAPAAESKEIVRGYK	33	0.530498	0.139456	-1.16892	5.70328e-05	-0.638419	0.00388249	0.356882	0.115836	-0.173616	0.640355
Q9NRY4	Rho GTPase-activating protein 35	ARHGAP35	ISSRFIRPSDRNQKNSLSDPNIDRINLVILG	589	0.452466	0.469499	-0.310534	0.310154	0.141932	0.648529	-0.282028	0.478784	-0.734494	0.135173
Q9NS37	CREB/ATF bZIP transcription factor	CREBZF	SSSSDSGSAEKRRRKSPGGGGGGGSGNDNNQ	189	0.61332	0.206087	-1.20102	0.00041993	-0.587699	0.0279794	0.78277	0.0211529	0.16945	0.781381
Q9NS91	E3 ubiquitin-protein ligase RAD18	RAD18	AWEASHKNDLQDTEISPRQNRRTRAAESAEI	471	-0.0503546	0.802967	0.935179	2.07534e-06	0.884824	5.33942e-06	-0.294264	0.02107	-0.24391	0.0871402
Q9NSC5	Homer protein homolog 3	HOMER3	VSANGPGEEKLFRSQSADAPGPTERERLKKM	159	-0.566137	0.282042	1.14486	0.00102924	0.57872	0.0423778	-1.1608	0.00455791	-0.594665	0.153727
Q9NSI6	Bromodomain and WD repeat-containing protein 1	BRWD1	KRLKSQTKIIPELVGSPTQSTSSRTAYLGTH	1475	-0.87978	0.540711	1.26205	0.0846625	0.382266	0.590205	-1.16888	0.192207	-0.2891	0.897932
Q9NSI6	Bromodomain and WD repeat-containing protein 1	BRWD1	LSLDIQSPPNIGLRRSGQVEGVRQMHQNAPR	710	0.590368	0.514165	-2.27802	0.00033601	-1.68765	0.00277859	0.558265	0.317821	-0.0321025	0.981108
Q9NSK0	Kinesin light chain 4	KLC4	TKVAELLGESDGRRTSQEGPGDSVKFEGGED	519	0.2896	0.430978	-1.13161	8.53952e-05	-0.842005	0.000815758	-0.146977	0.533078	-0.436578	0.130434
Q9NSU2	Three-prime repair exonuclease 1	TREX1	SAVTTTAHLATTRNTSPSLGESRGTKDLPPV	261	0.231004	0.684359	-2.02268	2.08028e-05	-1.79168	7.05164e-05	0.244942	0.476921	0.013938	0.987149
Q9NSY1	BMP-2-inducible protein kinase	BMP2K	__MKKFSRMPKSEGGSGGGAAGGGAGGAGAG	14	-0.268093	0.162609	0.0664327	0.476696	-0.20166	0.0498279	-0.0949263	0.438702	0.173167	0.268343
Q9NTI5	Sister chromatid cohesion protein PDS5 homolog B	PDS5B	SKQHRVSRRAQQRAESPESSAIESTQSTPQK	1358	0.969116	0.245327	1.65006	0.00196033	2.61918	0.000113003	-0.241456	0.662228	-1.21057	0.0668678
Q9NTI5	Sister chromatid cohesion protein PDS5 homolog B	PDS5B	KRLKEDILENEDEQNSPPKKGKRGRPPKPLG	1283	-0.049374	0.940988	0.139089	0.608576	0.0897151	0.747024	0.128064	0.723942	0.177438	0.807167
Q9NTI5	Sister chromatid cohesion protein PDS5 homolog B	PDS5B	RMETVSNASSSSNPSSPGRIKGRLDSSEMDH	1166	0.0459084	0.940988	1.02697	0.00168399	1.07288	0.00148243	-0.148652	0.659265	-0.19456	0.747271
Q9NTJ3	Structural maintenance of chromosomes protein 4	SMC4	RREEGPPPPSPDGASSDAEPEPPSGRTESPA	28	-0.14337	0.658567	1.83897	8.03721e-07	1.6956	2.60948e-06	-0.141866	0.476945	0.00150371	0.999456
Q9NTJ3	Structural maintenance of chromosomes protein 4	SMC4	ASSDAEPEPPSGRTESPATAAETASEELDNR	41	-0.254154	0.157629	-0.11351	0.202178	-0.367664	0.00169378	-0.33489	0.0108242	-0.0807356	0.673295
Q9NUL3	Double-stranded RNA-binding protein Staufen homolog 2	STAU2	SPKDMNQPSSSFFSISPTSNSSATIARELLM	455	0.859982	0.166931	-3.03158	3.05257e-06	-2.1716	5.05075e-05	1.10728	0.0136099	0.247296	0.734304
Q9NUP7	tRNA:m(4)X modification enzyme TRM13 homolog	TRMT13	TSNSTTKRQDNQNDDSEEHDDGGYRITDDGA	397	-0.497549	0.170932	1.49555	1.06797e-05	0.997998	0.000255902	-0.641403	0.014021	-0.143853	0.734304
Q9NUQ3	Gamma-taxilin	TXLNG	EDEGSDFITENRNLVSPAYCTQESREEIPGG	97	0.393548	0.458625	-2.39933	5.01617e-06	-2.00579	2.76056e-05	0.263689	0.433262	-0.129859	0.866492
Q9NUQ3	Gamma-taxilin	TXLNG	TENRNLVSPAYCTQESREEIPGGEARTDPPD	105	0.0167998	0.975434	2.38615	6.69353e-07	2.40295	1.3421e-06	-0.469107	0.0664001	-0.485907	0.117871
Q9NUQ6	SPATS2-like protein	SPATS2L	QYHNNRLNGPAKSQGSGNEAEPLGKGNSRHE	455	0.670378	0.532005	-1.39273	0.0178288	-0.722348	0.180283	-0.208141	0.762962	-0.878519	0.312919
Q9NUY8	TBC1 domain family member 23	TBC1D23	STSGSRSSINSVDGESPNGSSDRGMKSLVNK	474	-0.554339	0.123491	-0.898183	0.000358005	-1.45252	1.64034e-05	-0.101721	0.662228	0.452617	0.106094
Q9NV56	MRG/MORF4L-binding protein	MRGBP	SRVTDKVLTANSNPSSPSAAKRRRT______	195	-0.37568	0.0271006	0.820163	1.96712e-06	0.444483	0.000226203	-0.372845	0.00316767	0.00283487	0.991687
Q9NV70	Exocyst complex component 1	EXOC1	LTGSTSSLNKLSVQSSGNRRSQSSSLLDMGN	482	0.356255	0.363564	-0.242522	0.208863	0.113733	0.560937	0.342785	0.161514	-0.0134695	0.981108
Q9NVF7	F-box only protein 28	FBXO28	ESAVGNSSGSGQNEESPRKRKKATEAIDSLR	344	-0.277898	0.271867	1.06032	9.70984e-06	0.78242	0.000120709	-0.312559	0.0590631	-0.0346607	0.942017
Q9NVI1	Fanconi anemia group I protein	FANCI	SYGPKKVLDGKTIETSPSLSRMPNQHACKLG	407	0.635008	0.137743	-1.90624	5.45156e-06	-1.27124	0.000145023	0.517585	0.0606142	-0.117423	0.845497
Q9NVM6	DnaJ homolog subfamily C member 17	DNAJC17	KLDLEARERQAQAQESEEEEESRSTRTLEQE	112	-0.460245	0.152233	1.24521	1.59282e-05	0.784961	0.000542991	-0.487105	0.0267536	-0.0268603	0.960941
Q9NVR2	Integrator complex subunit 10	INTS10	IENQHQGAQDTSDLMSPSKRSSQKYIIEGLT	231	-0.197365	0.490328	0.988242	3.49422e-05	0.790878	0.000229523	-0.0598072	0.744285	0.137557	0.640355
Q9NVW2	E3 ubiquitin-protein ligase RLIM	RLIM	GSQNSENENEPSARRSSGENVENNSQRQVEN	163	-0.164058	0.797613	-0.520971	0.0822626	-0.685029	0.0315039	-0.135089	0.721476	0.028969	0.975378
Q9NVW2	E3 ubiquitin-protein ligase RLIM	RLIM	SQNSENENEPSARRSSGENVENNSQRQVENP	164	-0.215111	0.61799	-0.391132	0.0738156	-0.606242	0.0125574	-0.181135	0.504586	0.0339758	0.961248
Q9NW75	G patch domain-containing protein 2	GPATCH2	HSDSDDQMLVAKRRPSSNLNNNVRGKRPLWH	129	0.0960832	0.889576	-0.315049	0.292117	-0.218966	0.472573	0.0715153	0.859857	-0.0245679	0.979244
Q9NWB6	Arginine and glutamate-rich protein 1	ARGLU1	NTAVSRRERDRERASSPPDRIDIFGRTVSKR	77	-0.439556	0.0620346	1.05578	4.24284e-06	0.616223	0.000278283	-0.396812	0.0146488	0.0427446	0.909575
Q9NWC5	Transmembrane protein 45A	TMEM45A	SSEVGLLKNAEREQESEEEM___________	271	-0.674956	0.0100432	1.76301	1.4047e-07	1.08805	6.43806e-06	-0.593992	0.00194936	0.0809643	0.777418
Q9NWF9	E3 ubiquitin-protein ligase RNF216	RNF216	RVSINGYDHFCQHPRSPGAPCQECSRCSLWT	719	0.0933721	0.880347	-0.322443	0.230529	-0.229071	0.399829	0.15801	0.659265	0.0646384	0.954382
Q9NWH9	SAFB-like transcription modulator	SLTM	GRAGAGMITQHSSNASPINRIVQISGNSMPR	1002	0.502935	0.0204099	-1.11819	1.10484e-06	-0.615259	0.000116398	0.440884	0.00439827	-0.0620514	0.812552
Q9NWH9	SAFB-like transcription modulator	SLTM	SEASKPKDGQDAIAQSPEKESKDYEMNANHK	289	0.118214	0.739664	0.810052	0.000424368	0.928266	0.000210436	-0.0041977	0.985396	-0.122411	0.754018
Q9NWH9	SAFB-like transcription modulator	SLTM	ESIKKSEEKKRISSKSPGHMVILDQTKGDHC	553	-0.320655	0.229925	1.05433	1.49891e-05	0.733678	0.000265382	-0.331178	0.0581888	-0.0105233	0.979244
Q9NWH9	SAFB-like transcription modulator	SLTM	SNASPINRIVQISGNSMPRGSGSGFKPFKGG	1014	0.0369442	0.928379	-1.90602	1.273e-06	-1.86908	2.66779e-06	0.0878482	0.698953	0.050904	0.933932
Q9NWT1	p21-activated protein kinase-interacting protein 1	PAK1IP1	KVADMKESLPPAAEPSPVSKEQSKIGKKEPG	320	0.817802	0.0192973	-0.554908	0.00400933	0.262894	0.110878	0.733043	0.00355037	-0.0847591	0.856852
Q9NWV8	BRISC and BRCA1-A complex member 1	BABAM1	EEEEEHSAEPRPRTRSNPEGAEDRAVGAQAS	29	-0.135643	0.452216	1.19797	3.47702e-07	1.06233	1.55533e-06	-0.621468	0.0003032	-0.485825	0.00292131
Q9NX58	Cell growth-regulating nucleolar protein	LYAR	GSAGKRSKKKKQRKDSASEEEARVGAGKRKR	258	0.385513	0.240907	-0.324247	0.0602135	0.0612664	0.709034	-0.0897794	0.679137	-0.475293	0.0659793
Q9NX58	Cell growth-regulating nucleolar protein	LYAR	AGKRSKKKKQRKDSASEEEARVGAGKRKRRH	260	-0.071603	0.909901	0.227966	0.392274	0.156363	0.568184	-0.173115	0.627172	-0.101512	0.909575
Q9NX58	Cell growth-regulating nucleolar protein	LYAR	EEEARVGAGKRKRRHSEVETDSKKKKMKLPE	276	-0.215012	0.720904	-1.51427	0.000237461	-1.72928	0.000122705	-0.298396	0.404331	-0.083384	0.933116
Q9NXR1	Nuclear distribution protein nudE homolog 1	NDE1	LESKLASCRNLVYDQSPNRTGGPASGRSSKN	282	0.580241	0.52527	-1.4741	0.00576549	-0.893857	0.0615534	0.59475	0.293463	0.0145096	0.991734
Q9NXV6	CDKN2A-interacting protein	CDKN2AIP	NSHMTQSTDSRQQSGSPKKSALEGSSASASQ	268	-0.430798	0.0215319	1.43377	9.14253e-08	1.00297	1.76479e-06	-0.330604	0.00960119	0.100194	0.534341
Q9NY27	Serine/threonine-protein phosphatase 4 regulatory subunit 2	PPP4R2	SNSLNRMNGVMFPGNSPSYTERSNINGPGTP	159	0.179106	0.410614	-0.217369	0.0553298	-0.0382627	0.72223	0.253737	0.0694082	0.0746306	0.781504
Q9NYB0	Telomeric repeat-binding factor 2-interacting protein 1	TERF2IP	LRGQEHKYLLGDAPVSPSSQKLKRKAEEDPE	203	0.0144011	0.948089	0.703815	1.82274e-05	0.718216	2.31514e-05	0.285348	0.024787	0.270947	0.0625602
Q9NYB9	Abl interactor 2	ABI2	DYVPSPTRNMAPSQQSPVRTASVNQRNRTYS	227	0.493963	0.00470262	-0.198491	0.0141516	0.295472	0.00167089	0.35832	0.00230795	-0.135643	0.241176
Q9NYF8	Bcl-2-associated transcription factor 1	BCLAF1	QEKQTKKAEGEPQEESPLKSKSQEEPKDTFE	177	-0.0794405	0.781773	0.804104	8.53607e-05	0.724663	0.000230659	-0.219789	0.178501	-0.140348	0.570361
Q9NYF8	Bcl-2-associated transcription factor 1	BCLAF1	HKNLDAREKSTFREESPLRIKMIASDSHRPE	531	-0.344638	0.0445943	1.25083	1.44483e-07	0.906192	2.32156e-06	-0.242804	0.0293578	0.101834	0.493097
Q9NYF8	Bcl-2-associated transcription factor 1	BCLAF1	EDKNSERITVKKETQSPEQVKSEKLKDLFDY	496	-0.0281302	0.925641	0.786459	8.22607e-05	0.758329	0.000142684	-0.0845217	0.608892	-0.0563915	0.881855
Q9NYF8	Bcl-2-associated transcription factor 1	BCLAF1	DYFSDKESGKQKFNDSEGDDTEETEDYRQFR	397	-0.244954	0.226979	1.33331	3.97003e-07	1.08836	2.91408e-06	-0.304624	0.0287039	-0.0596702	0.833068
Q9NYF8	Bcl-2-associated transcription factor 1	BCLAF1	GLKYKSKVSLKGNRESDGFREEKNYKLKETG	450	0.792915	0.363564	-2.6663	9.05252e-05	-1.87339	0.0012323	0.666383	0.221443	-0.126532	0.934182
Q9NYF8	Bcl-2-associated transcription factor 1	BCLAF1	STRQKSPEIHRRIDISPSTLRKHTRLAGEER	658	0.00265561	0.9962	0.889865	0.00350422	0.892521	0.00388559	-0.110894	0.732108	-0.113549	0.87967
Q9NYF8	Bcl-2-associated transcription factor 1	BCLAF1	EQDHSRSSSSSASPSSPSSREEKESKKEREE	760	-2.17667	0.0302179	5.41161	9.72824e-07	3.23494	5.83594e-05	-1.29714	0.0398515	0.879527	0.249967
Q9NYJ8	TGF-beta-activated kinase 1 and MAP3K7-binding protein 2	TAB2	HHPPKSRAIGNNSATSPRVVVTQPNTKYTFK	450	-0.153089	0.804951	-1.12807	0.0016689	-1.28116	0.000866588	0.169641	0.645438	0.32273	0.53892
Q9NYM9	BET1-like protein	BET1L	_______MADWARAQSPGAVEEILDRENKRM	9	0.324167	0.533725	-2.07045	1.26171e-05	-1.74628	6.11787e-05	0.498768	0.125905	0.174601	0.788054
Q9NYP9	Protein Mis18-alpha	MIS18A	DKGKCSDSSLLGKRLSEDSSRHQLLQKWASM	36	-0.232385	0.858486	-0.776339	0.16701	-1.00872	0.0856586	-0.093824	0.901681	0.138561	0.951589
Q9NYV4	Cyclin-dependent kinase 12	CDK12	GKKDGSGGASGTLQPSSGGGSSNSRERHRLV	24	0.652941	0.500436	-2.31053	0.000492704	-1.65759	0.00458913	0.798394	0.184928	0.145453	0.929942
Q9NYV4	Cyclin-dependent kinase 12	CDK12	SGGASGTLQPSSGGGSSNSRERHRLVSKHKR	29	0.252015	0.804469	-2.09585	0.000730222	-1.84383	0.00194804	0.378588	0.523173	0.126572	0.94062
Q9NYV4	Cyclin-dependent kinase 12	CDK12	KETTSGTSTEPVKNSSPAPPQPAPGKVESGA	1083	-0.119839	0.553	0.948321	3.82197e-06	0.828482	1.56413e-05	-0.0717422	0.581496	0.0480969	0.871923
Q9NYV4	Cyclin-dependent kinase 12	CDK12	DCHELWSKKRRRQRQSGVVVEEPPPSKTSRK	1053	-0.155084	0.880347	-1.45395	0.00650559	-1.60904	0.00409265	-0.130539	0.829913	0.0245454	0.986159
Q9NYZ3	G2 and S phase-expressed protein 1	GTSE1	PNKLGLKKTLLKAPGSTSNLARKSSSGPVWS	303	0.517094	0.497664	-3.0029	1.33171e-05	-2.48581	7.29176e-05	0.514389	0.275201	-0.0027047	0.999727
Q9NYZ3	G2 and S phase-expressed protein 1	GTSE1	STPKLSRAQRPQSCTSVGRVTVHSTPVRRSS	480	-0.132823	0.896935	-2.14963	0.000599942	-2.28245	0.000486656	0.613319	0.286045	0.746142	0.323066
Q9NYZ3	G2 and S phase-expressed protein 1	GTSE1	SPLLGPPVGEPRLLASSPALPSSGAQARLTR	167	0.76233	0.310817	-2.79524	2.25965e-05	-2.03291	0.000289767	0.853042	0.0796697	0.0907114	0.954382
Q9NYZ3	G2 and S phase-expressed protein 1	GTSE1	PLLGPPVGEPRLLASSPALPSSGAQARLTRA	168	0.547484	0.456593	-3.22553	6.2823e-06	-2.67805	3.61474e-05	0.613268	0.183204	0.0657838	0.959949
Q9NYZ3	G2 and S phase-expressed protein 1	GTSE1	RKTDSRLVDVSPDRGSPPSRVPQALNFSPEE	580	0.206257	0.401406	1.52756	5.29657e-07	1.73381	6.07296e-07	0.50282	0.00652785	0.296563	0.121546
Q9NZ63	Uncharacterized protein C9orf78	C9orf78	RPLRVGDTEKPEPERSPPNRKRPANEKATDD	261	-0.264976	0.298308	0.965643	2.00258e-05	0.700666	0.000263671	-0.174718	0.276568	0.0902583	0.777359
Q9NZD8	Maspardin	SPG21	VSAEELEVQKGSLGISQEEQ___________	304	0.806879	0.469499	-1.24399	0.0366025	-0.437107	0.432175	0.481109	0.501352	-0.325769	0.833068
Q9NZI8	Insulin-like growth factor 2 mRNA-binding protein 1	IGF2BP1	GRRGGFGSRGQPRQGSPVAAGAPAKQQQVDI	181	-0.309643	0.203955	0.635923	0.000293971	0.32628	0.0177492	-0.333224	0.0403341	-0.0235801	0.959949
Q9NZJ0	Denticleless protein homolog	DTL	LAMAAKRKAENPSPRSPSSQTPNSRRQSGKK	679	-0.660711	0.279704	4.03514	3.85041e-07	3.37443	2.39909e-06	-1.2927	0.00582347	-0.631992	0.19705
Q9NZJ0	Denticleless protein homolog	DTL	RPCGEGSEMVGKENSSPENKNWLLAMAAKRK	656	-0.429422	0.104161	1.05918	1.16974e-05	0.629762	0.0005978	-0.281005	0.0924109	0.148416	0.544104
Q9NZN5	Rho guanine nucleotide exchange factor 12	ARHGEF12	KSETIQDTDTQSLVGSPSTRIAPHIIGAEDD	341	0.557767	0.244216	-0.671242	0.013657	-0.113475	0.637715	0.588718	0.0606142	0.0309515	0.966157
Q9NZN5	Rho guanine nucleotide exchange factor 12	ARHGEF12	SVQEDWQHFPRYRTASQGPQTDSVIQNSENI	1288	-0.312519	0.189868	0.466148	0.00198106	0.153629	0.204384	-0.549242	0.00353491	-0.236723	0.215801
Q9NZN5	Rho guanine nucleotide exchange factor 12	ARHGEF12	CSSGDASRPSSDNADSPKSGPKERIYLEENP	309	0.819419	0.0014354	-0.900804	3.86963e-06	-0.081385	0.395522	1.23464	6.32684e-06	0.415223	0.0101818
Q9NZN8	CCR4-NOT transcription complex subunit 2	CNOT2	GIPSRTNSMSSSGLGSPNRSSPSIICMPKQQ	165	0.610636	0.022776	3.01877	1.01592e-08	3.6294	7.87438e-09	0.450391	0.0126154	-0.160245	0.46741
Q9NZT2	Opioid growth factor receptor	OGFR	LPHPLEGSRKVEEEGSPGDPDHEASTQGRTC	315	0.142395	0.791925	0.121027	0.611212	0.263422	0.284272	-0.010798	0.974911	-0.153193	0.812552
Q9NZT2	Opioid growth factor receptor	OGFR	GDEAGGHGEDRPEPLSPKESKKRKLELSRRE	378	-0.0226459	0.936467	0.751661	7.08442e-05	0.729015	0.000119583	-0.0534774	0.727427	-0.0308315	0.945672
Q9P0V9	Septin-10	2024-09-10	QSHMATKTTCMSSQGSDDEQIKRENIRSLTM	28	-0.199682	0.57631	0.710507	0.00170865	0.510826	0.0124717	0.178662	0.429894	0.378344	0.178596
Q9P1Y5	Calmodulin-regulated spectrin-associated protein 3	CAMSAP3	DLPDGHAASPRGTEASPPQNNSGSSSPVFTF	341	-0.372093	0.7761	1.86384	0.00723798	1.49175	0.0238472	-0.292349	0.707576	0.0797436	0.964438
Q9P206	Uncharacterized protein KIAA1522	KIAA1522	SPASVRSLGRFSSVSSPQPRSRHPSSSSDTW	342	0.493497	0.112765	-1.4587	3.70162e-06	-0.965198	0.000106514	0.326156	0.0978718	-0.167341	0.567326
Q9P206	Uncharacterized protein KIAA1522	KIAA1522	SNSVVPPPQGGSGRGSPSGGSTAEASDTLSI	404	-0.0642213	0.839074	0.453019	0.00619984	0.388798	0.0150374	-0.3719	0.0452398	-0.307679	0.165193
Q9P246	Stromal interaction molecule 2	STIM2	RSSSLCRSRRSIVPSSPQPQRAQLAPHAPHP	523	-0.458306	0.0317371	-0.434887	0.00105205	-0.893193	9.81005e-06	-0.0425915	0.744285	0.415714	0.013215
Q9P265	Disco-interacting protein 2 homolog B	DIP2B	QKGYEKKRSKLLSPYSPQTQETDSAVQKELR	53	1.69886	0.0198145	-4.09229	5.97653e-07	-2.39343	4.10653e-05	1.52892	0.00355276	-0.169945	0.865045
Q9P270	SLAIN motif-containing protein 2	SLAIN2	SPVRAGASIPSSGAASPRGFPLGLSAKSGGG	63	1.57861	0.000634824	-1.87441	7.63986e-07	-0.295798	0.0749105	1.44646	4.61996e-05	-0.132158	0.709193
Q9P270	SLAIN motif-containing protein 2	SLAIN2	SRSGAVQGAGSLGPGSPVRAGASIPSSGAAS	48	0.000118729	0.999812	-0.125901	0.740376	-0.125783	0.746269	-0.185423	0.715434	-0.185542	0.871923
Q9P275	Ubiquitin carboxyl-terminal hydrolase 36	USP36	PVVASTWPVHRARAVSPAPQSSSRLQPPFSP	742	-0.51027	0.0200969	0.815728	1.16974e-05	0.305458	0.00939599	-0.358998	0.0134052	0.151271	0.370855
Q9P275	Ubiquitin carboxyl-terminal hydrolase 36	USP36	QRQGSWDSRDVVLSTSPKLLATATANGHGLK	582	0.93902	0.108976	-1.07963	0.00262892	-0.140614	0.62579	1.0792	0.0108242	0.140184	0.871232
Q9P275	Ubiquitin carboxyl-terminal hydrolase 36	USP36	HFSPRTAQGLPGTSNSNSSRSGSQRQGSWDS	559	0.456131	0.850462	-3.55169	0.00508289	-3.09556	0.0117891	0.73546	0.594775	0.279329	0.945672
Q9P2B4	CTTNBP2 N-terminal-like protein	CTTNBP2NL	FQSQADQDQQASGLQSPPSRDLSPTLIDNSA	481	0.254396	0.754073	2.08014	0.000191544	2.33454	0.000112949	0.106022	0.832236	-0.148374	0.899431
Q9P2B4	CTTNBP2 N-terminal-like protein	CTTNBP2NL	RNLANTANPRGDTSHSPTPGKVSSPLSPLSP	549	0.402597	0.458625	-1.11116	0.00143333	-0.70856	0.0193775	0.302111	0.375697	-0.100486	0.909575
Q9P2D1	Chromodomain-helicase-DNA-binding protein 7	CHD7	AFEEDIETPPTRNIPSPGQLDPDTRIPVINL	2559	-0.124217	0.638622	0.865111	4.46351e-05	0.740894	0.000181137	-0.318102	0.0570015	-0.193885	0.367072
Q9P2E9	Ribosome-binding protein 1	RRBP1	KKAEGSPSEGKKAEGSPNQGKKADAAANQGK	583	-0.318339	0.21634	-0.292503	0.0348781	-0.610843	0.000687197	0.206686	0.203694	0.525025	0.0139831
Q9P2E9	Ribosome-binding protein 1	RRBP1	TKVEGITNQGKKAEGSPSEGKKAEGSPNQGK	573	-0.0190444	0.967652	-0.891943	0.000395105	-0.910988	0.000419252	0.365736	0.108126	0.38478	0.173125
Q9P2E9	Ribosome-binding protein 1	RRBP1	TESASVQGRNTDVAQSPEAPKQEAPAKKKSG	615	-0.37092	0.546605	-1.22883	0.0016214	-1.59975	0.000345105	0.165016	0.680261	0.535936	0.281667
Q9P2E9	Ribosome-binding protein 1	RRBP1	MKSHVEDGDIAGAPASSPEAPPAEQDPVQLK	1276	-0.033224	0.920785	-1.33336	4.31188e-06	-1.36658	6.25713e-06	0.176513	0.328634	0.209737	0.392516
Q9P2E9	Ribosome-binding protein 1	RRBP1	KSHVEDGDIAGAPASSPEAPPAEQDPVQLKT	1277	0.0161611	0.954717	-1.45882	5.35145e-07	-1.44266	1.30038e-06	0.244637	0.100655	0.228476	0.220358
Q9P2M7	Cingulin	CGN	NHVGTSKQPAQSQNLSPLSGFSRSRQTQDWV	258	0.132954	0.794104	-0.206376	0.36223	-0.0734217	0.750407	0.458743	0.118668	0.325789	0.411121
Q9P2R6	Arginine-glutamic acid dipeptide repeats protein	RERE	RTSPINEDIRSSGRNSPSAASTSSNDSKAET	613	-0.0378996	0.817329	0.809794	1.29461e-06	0.771894	3.18855e-06	0.1286	0.165085	0.1665	0.151758
Q9UBB5	Methyl-CpG-binding domain protein 2	MBD2	LSRAADTEEMDIEMDSGDEA___________	407	-0.376031	0.107997	1.20331	1.83819e-06	0.827283	4.18892e-05	-0.341685	0.0293346	0.034346	0.932318
Q9UBF8	Phosphatidylinositol 4-kinase beta	PI4KB	SVPARIPENRIRSTRSVENLPECGITHEQRA	428	-0.331815	0.271996	1.19235	1.50586e-05	0.860536	0.000210356	-0.0118879	0.954651	0.319927	0.185681
Q9UBI6	Guanine nucleotide-binding protein G(I)/G(S)/G(O) subunit gamma-12	GNG12	_________MSSKTASTNNIAQARRTVQQLR	7	0.0866596	0.913339	0.264479	0.429634	0.351139	0.308779	-0.0448652	0.922655	-0.131525	0.907203
Q9UBK8	Methionine synthase reductase	MTRR	SSRGQEEISGALPVASPASSRTDLVKSELLH	171	0.979017	0.189668	-2.75287	2.34857e-05	-1.77385	0.000667304	1.21099	0.0206036	0.231975	0.813539
Q9UBK8	Methionine synthase reductase	MTRR	WIAGLWPALRKHFRSSRGQEEISGALPVASP	157	-0.00843008	0.986591	3.75478	3.09202e-08	3.74635	1.05878e-07	-0.547049	0.0347173	-0.538618	0.0731589
Q9UBN7	Histone deacetylase 6	HDAC6	DSTTTRQRRSRQNPQSPPQDSSVTSKRNIKK	22	0.608098	0.447344	-0.70359	0.084954	-0.0954926	0.809601	0.787261	0.118229	0.179163	0.87967
Q9UBQ5	Eukaryotic translation initiation factor 3 subunit K	EIF3K	VEKIDFDSVSSIMASSQ______________	217	-0.593671	0.0468871	1.51142	1.65974e-06	0.917744	9.10289e-05	-0.735321	0.00196656	-0.14165	0.632494
Q9UDY2	Tight junction protein ZO-2	TJP2	FGPSRDRDRDRSRGRSIDQDYERAYHRAYDP	244	-0.0743185	0.894781	0.333226	0.181924	0.258907	0.303769	-0.12096	0.713494	-0.0466413	0.959949
Q9UDY4	DnaJ homolog subfamily B member 4	DNAJB4	SAFGFSMNGYPRDRNSVGPSRLKQDPPVIHE	148	0.453112	0.651136	-2.73158	0.000160903	-2.27847	0.000684744	0.184755	0.769206	-0.268357	0.842421
Q9UER7	Death domain-associated protein 6	DAXX	EDEEEEAAAGKDGDKSPMSSLQISNEKNLEP	495	0.0344401	0.919408	0.744773	0.000312886	0.779213	0.000285565	-0.0239563	0.90195	-0.0583964	0.898057
Q9UER7	Death domain-associated protein 6	DAXX	ISNEKNLEPGKQISRSSGEQQNKGRIVSPSL	517	0.461826	0.668143	-2.8613	0.000188141	-2.39947	0.000761183	0.601282	0.355338	0.139456	0.943323
Q9UFC0	Leucine-rich repeat and WD repeat-containing protein 1	LRWD1	VPLSLSPSKRACASPSAQVEGSPVAGSDGSQ	253	-0.449915	0.367186	3.74149	1.52407e-07	3.29158	9.00467e-07	-0.791207	0.0221125	-0.341291	0.427831
Q9UFC0	Leucine-rich repeat and WD repeat-containing protein 1	LRWD1	PSKRACASPSAQVEGSPVAGSDGSQPAVKLE	259	1.31451	0.00115209	1.84753	5.11078e-07	3.16204	5.84335e-08	0.952138	0.000464119	-0.362369	0.117022
Q9UGU0	Transcription factor 20	TCF20	SDTTYKGGASEKAGSSPAQGAQNEPPRLNAS	559	-0.0710156	0.728245	0.504635	0.000259544	0.433619	0.000875017	-0.111314	0.354167	-0.0402979	0.894906
Q9UGU0	Transcription factor 20	TCF20	DIKSIPKRDSSKDLPSPDSRNCPAVTLTSPA	1322	0.406523	0.0899401	0.228358	0.0621027	0.634881	0.000280304	0.390782	0.018555	-0.0157412	0.964438
Q9UGU0	Transcription factor 20	TCF20	PPRLNASPAAREEATSPGAKDMPLSSDGNPK	583	-0.0277551	0.87992	0.993369	5.68192e-07	0.965614	1.40216e-06	-0.0520159	0.619896	-0.0242608	0.929942
Q9UGU0	Transcription factor 20	TCF20	CSSSSEDQGERVRQLSGQSTSSDTTYKGGAS	538	0.379449	0.422563	0.320467	0.172859	0.699915	0.010582	-0.138698	0.654765	-0.518147	0.162588
Q9UGV2	Protein NDRG3	NDRG3	GSGESPFSRSVTSNQSDGTQESCESPDVLDR	352	-0.628403	0.217021	2.48279	3.10931e-06	1.85439	3.86978e-05	-0.36555	0.251316	0.262853	0.607429
Q9UHB6	LIM domain and actin-binding protein 1	LIMA1	KPLSPDSRASSLSESSPPKAMKKFQAPARET	374	1.0438	0.0014354	-0.885765	2.63163e-05	0.15803	0.201878	1.00587	9.36713e-05	-0.0379274	0.928364
Q9UHB6	LIM domain and actin-binding protein 1	LIMA1	LERPAQLANARETPHSPGVEDAPIAKVGVLA	490	-0.105839	0.681218	0.193023	0.119808	0.0871838	0.47681	-0.274504	0.0817716	-0.168665	0.427831
Q9UHB6	LIM domain and actin-binding protein 1	LIMA1	QVKSEVQQPVHPKPLSPDSRASSLSESSPPK	362	0.393033	0.398254	-0.227392	0.31371	0.165641	0.472573	0.116792	0.698953	-0.276241	0.513479
Q9UHB6	LIM domain and actin-binding protein 1	LIMA1	GADSDEDDNSFLKQQSPQEPKSLNWSSFVDN	698	-1.09784	0.00929713	1.24291	4.59767e-05	0.145076	0.432175	-0.4493	0.0609297	0.648536	0.0297805
Q9UHB7	AF4/FMR2 family member 4	AFF4	SNSNKETSGSSKNSSSTSKQKKTEGKTSSSS	860	1.59662	0.000739981	-3.5716	1.99664e-08	-1.97499	1.49887e-06	1.98609	8.81065e-06	0.389476	0.135486
Q9UHB7	AF4/FMR2 family member 4	AFF4	LTEHLKNSYNNSQAPSPGLGSKAVGMPSPVS	1043	0.146244	0.651326	-0.853618	0.000211747	-0.707375	0.00091538	0.608751	0.00892904	0.462507	0.0617578
Q9UHB7	AF4/FMR2 family member 4	AFF4	KTIQKGSESGRGRQKSPAQSDSTTQRRTVGK	549	-0.249053	0.405884	0.88379	0.000114648	0.634737	0.00131652	0.133548	0.480908	0.3826	0.102369
Q9UHB9	Signal recognition particle subunit SRP68	SRP68	MAAEKQVPGGGGGGGSGGGGGSGGGGSGGGR	16	0.367381	0.816441	-1.74533	0.0244907	-1.37795	0.06632	0.597588	0.513064	0.230207	0.923765
Q9UHD8	Septin-9	2024-09-09	PRRVQTPLLRATVASSTQKFQDLGVKNSEPS	59	1.07306	0.408014	-4.40076	4.07009e-05	-3.3277	0.000379402	1.054	0.193837	-0.0190621	0.992478
Q9UHD8	Septin-9	2024-09-09	RLRRLGDSSGPALKRSFEVEEVETPNSTPPR	30	-0.255111	0.756093	3.21057	8.735e-06	2.95546	2.35659e-05	-0.417721	0.385589	-0.16261	0.893047
Q9UHF7	Zinc finger transcription factor Trps1	TRPS1	ETGQAQSGQANCQGLSPVSVASKNPQVPSDG	178	0.868751	0.000449797	-0.351662	0.000908739	0.517088	8.34711e-05	0.495706	0.000609925	-0.373045	0.00671422
Q9UHI6	Probable ATP-dependent RNA helicase DDX20	DDX20	TSSQSKGNKSYLEGSSDNQLKDSESTPVDDR	678	-1.07229	0.241409	2.62424	0.000155798	1.55195	0.00538679	-0.407467	0.487859	0.66482	0.396446
Q9UHI6	Probable ATP-dependent RNA helicase DDX20	DDX20	TPVDDRISLEQPPNGSDTPNPEKYQESPGIQ	703	-0.340793	0.289682	2.34683	1.95317e-07	2.00604	1.29776e-06	-0.413664	0.0513404	-0.0728712	0.87967
Q9UHI6	Probable ATP-dependent RNA helicase DDX20	DDX20	TPGPVRILRTAQDLSSPRTRTGDVLLAEPAD	48	1.16419	0.000730114	-3.75148	3.53871e-09	-2.58729	5.84335e-08	1.18494	3.22154e-05	0.0207481	0.960941
Q9UHI6	Probable ATP-dependent RNA helicase DDX20	DDX20	PPNGSDTPNPEKYQESPGIQMKTRLKEGASQ	714	0.56365	0.282333	-0.200698	0.435006	0.362952	0.177294	0.505508	0.130518	-0.0581425	0.959949
Q9UHR4	Brain-specific angiogenesis inhibitor 1-associated protein 2-like protein 1	BAIAP2L1	IKTPASTPVSGTPQASPMIERSNVVRKDYDT	261	-0.104809	0.821363	1.40604	4.64687e-05	1.30123	0.000112666	-0.128836	0.639187	-0.0240267	0.971893
Q9UHY1	Nuclear receptor-binding protein	NRBP1	______________MSEGESQTVLSSGSDPK	2	-0.154547	0.41205	0.856458	4.72436e-06	0.701912	2.99875e-05	0.190923	0.108839	0.345469	0.0230677
Q9UI08	Ena/VASP-like protein	EVL	TSPSPGTRAASQPPNSSEAGRKPWERSNSVE	318	1.90971	0.057232	-4.60232	3.57271e-06	-2.69261	0.00023305	1.14138	0.0678579	-0.768331	0.337098
Q9UI08	Ena/VASP-like protein	EVL	KLRRVQRPEDASGGSSPSGTSKSDANRASSG	246	0.87109	0.155405	-2.62276	7.68425e-06	-1.75168	0.00019315	0.5595	0.146489	-0.31159	0.613259
Q9UIF7	A/G-specific adenine DNA glycosylase	MUTYH	QQPGTCMGSKRSQVSSPCSRKKPRMGQQVLD	512	0.420998	0.0235349	-0.158452	0.0752727	0.262546	0.00926031	0.678283	0.000126776	0.257285	0.0589067
Q9UIF9	Bromodomain adjacent to zinc finger domain protein 2A	BAZ2A	LAPKRRAGDPGEMPQSPTGLGQPKRRGRPPS	1397	0.475669	0.00643937	0.431372	0.000129633	0.907041	1.31685e-06	0.823833	1.42693e-05	0.348164	0.0064234
Q9UIF9	Bromodomain adjacent to zinc finger domain protein 2A	BAZ2A	FSMKMELAGSNTTASSPARARGRPRKTKPGS	1184	-0.186662	0.522912	-0.998878	3.70114e-05	-1.18554	1.58381e-05	0.292448	0.110795	0.479109	0.0377872
Q9UIG0	Tyrosine-protein kinase BAZ1B	BAZ1B	QKKETVVKEDEGRRESINDRARRSPRKLPTS	189	0.0878106	0.889387	-2.02708	2.50585e-05	-1.93926	4.96204e-05	0.422056	0.225024	0.334246	0.51084
Q9UIG0	Tyrosine-protein kinase BAZ1B	BAZ1B	KYMTLNPSTKRKNTGSPDRKPSKKSKTDNSS	312	0.178871	0.841441	1.46525	0.0029047	1.64412	0.00164514	0.192223	0.713494	0.0133524	0.991687
Q9UIG0	Tyrosine-protein kinase BAZ1B	BAZ1B	KRKKFPDRLAEDEGDSEPEAVGQSRGRRQKK	1468	-0.803155	0.00426188	1.50346	3.81157e-07	0.700308	0.00012319	-0.560498	0.00249025	0.242657	0.18052
Q9UIG0	Tyrosine-protein kinase BAZ1B	BAZ1B	RKPSKKSKTDNSSLSSPLNPKLWCHVHLKKS	330	0.427137	0.650252	-1.87397	0.00137359	-1.44684	0.00719348	0.679902	0.230339	0.252766	0.842421
Q9UIG0	Tyrosine-protein kinase BAZ1B	BAZ1B	PKLWCHVHLKKSLSGSPLKVKNSKNSKSPEE	349	-0.783396	0.00622303	1.87364	1.35129e-07	1.09025	8.71529e-06	-0.362911	0.0277667	0.420485	0.0306484
Q9UJ41	Rab5 GDP/GTP exchange factor	RABGEF1	IQEAKAPSPSINRQTSIETDRVSKEFIEFLK	132	-0.443178	0.681475	2.07361	0.00161128	1.63044	0.00744965	-0.460463	0.481422	-0.0172856	0.991687
Q9UJ70	N-acetyl-D-glucosamine kinase	NAGK	GVDPLVPLRSLGLSLSGGDQEDAGRILIEEL	76	0.0188702	0.938751	0.329534	0.00604157	0.348404	0.00491701	-0.074107	0.572581	-0.0929772	0.665303
Q9UJF2	Ras GTPase-activating protein nGAP	RASAL2	TVPDRHIPLALPRQNSTGQAQIRKVDQGGLG	864	0.343383	0.291173	0.309197	0.0687509	0.65258	0.0019944	-0.113478	0.59305	-0.456861	0.0733253
Q9UJF2	Ras GTPase-activating protein nGAP	RASAL2	QNGSRSRQQSSSSRESPVPKVRAIQRQQTQQ	928	-0.224286	0.514772	0.0114775	0.946779	-0.212809	0.216218	0.0464931	0.836616	0.27078	0.337064
Q9UJK0	Ribosome biogenesis protein TSR3 homolog	TSR3	ASEDPGPGAERGGASSSCCEEEQTQGRGAEA	281	-0.288118	0.509989	0.467389	0.0412131	0.179271	0.405028	-0.772325	0.013283	-0.484207	0.153727
Q9UJU6	Drebrin-like protein	DBNL	IFKQKERAMSTTSISSPQPGKLRSPFLQKQL	275	0.999179	0.222719	-3.7832	4.62585e-06	-2.78402	6.24885e-05	1.63457	0.00814853	0.635395	0.355772
Q9UJU6	Drebrin-like protein	DBNL	AARREQRYQEQGGEASPQRTWEQQQEVVSRN	232	0.2606	0.729916	-1.75253	0.000398707	-1.49193	0.00137175	0.758245	0.0924109	0.497645	0.407148
Q9UK59	Lariat debranching enzyme	DBR1	SGNGEDLTKVPLKRLSDEHEPEQRKKIKRRN	514	0.130881	0.765935	-0.618605	0.00813544	-0.487724	0.0279817	0.0738949	0.781496	-0.0569863	0.938342
Q9UK61	Protein FAM208A	FAM208A	IIIKASAKGGNLPPVSPNDSGAKIASNPLER	1103	-0.389729	0.0918907	0.588266	0.000300152	0.198537	0.092461	-0.216263	0.13152	0.173466	0.359367
Q9UK61	Protein FAM208A	FAM208A	EIHWKLIPITGGNARSPEDQLGKHGEKQTPG	927	-0.238179	0.264681	0.0752305	0.471329	-0.162948	0.139023	-0.204028	0.132863	0.0341508	0.925822
Q9UK76	Hematological and neurological expressed 1 protein;Hematological and neurological expressed 1 protein, N-terminally processed	HN1	SAGAKSSGGREDLESSGLQRRNSSEASSGDF	80	3.08602	0.00171712	-2.97819	1.37381e-05	0.107835	0.773442	-0.392048	0.410883	-3.47807	0.000113256
Q9UK76	Hematological and neurological expressed 1 protein;Hematological and neurological expressed 1 protein, N-terminally processed	HN1	TTTTTFKGVDPNSRNSSRVLRPPGGGSNFSL	17	0.622166	0.550494	-3.35874	6.17792e-05	-2.73657	0.000337435	1.19825	0.0739656	0.576085	0.555243
Q9UK76	Hematological and neurological expressed 1 protein;Hematological and neurological expressed 1 protein, N-terminally processed	HN1	GGREDLESSGLQRRNSSEASSGDFLDLKGEG	87	-0.0614492	0.901684	0.175999	0.412131	0.11455	0.601349	0.136171	0.636613	0.19762	0.673671
Q9UK76	Hematological and neurological expressed 1 protein;Hematological and neurological expressed 1 protein, N-terminally processed	HN1	GREDLESSGLQRRNSSEASSGDFLDLKGEGD	88	-0.481664	0.338712	0.255979	0.300219	-0.225686	0.371805	-0.0665816	0.841671	0.415083	0.314966
Q9UKG1	DCC-interacting protein 13-alpha	APPL1	TAARVNQSALEAVTPSPSFQQRHESLRPAAG	401	0.0664803	0.824336	-0.777623	0.000143798	-0.711143	0.000336584	-0.0107508	0.953864	-0.077231	0.836648
Q9UKI8	Serine/threonine-protein kinase tousled-like 1	TLK1	SSRGRKRKAENQNESSQGKSIGGRGHKISDY	134	-0.370281	0.533794	-0.628591	0.0438788	-0.998872	0.00518041	-0.861654	0.0306798	-0.491374	0.310579
Q9UKJ3	G patch domain-containing protein 8	GPATCH8	QNSNIGTGRGSEGDCSPEDKNSVTAKLLLEK	1081	0.444734	0.0655975	0.36143	0.00798089	0.806164	5.61134e-05	0.590496	0.00219379	0.145762	0.492881
Q9UKJ3	G patch domain-containing protein 8	GPATCH8	ACSGLNKQEPGGSHGSETEDTGRSLPSKKER	653	-0.28332	0.329679	1.09275	2.06473e-05	0.809435	0.00023676	-0.0264629	0.892365	0.256857	0.280662
Q9UKM9	RNA-binding protein Raly	RALY	RDDFYDRLFDYRGRLSPVPVPRAVPVKRPRV	135	-0.188593	0.549448	0.160119	0.298914	-0.0284738	0.858775	-0.129256	0.523173	0.0593366	0.909575
Q9UKN8	General transcription factor 3C polypeptide 4	GTF3C4	LWKPTHEDSKILLVDSPGMGNADDEQQEEGT	611	0.660802	0.555833	-0.887312	0.117945	-0.22651	0.685673	0.30666	0.676822	-0.354142	0.809542
Q9UKV3	Apoptotic chromatin condensation inducer in the nucleus	ACIN1	ERRSSRVRQARAAKLSEGSQPAEEEEDQETP	240	0.369689	0.599218	1.44549	0.00132029	1.81518	0.000353951	-0.444387	0.305641	-0.814075	0.135486
Q9UKV3	Apoptotic chromatin condensation inducer in the nucleus	ACIN1	PPVPQLQVCEPKERTSTSSSSVQARRLSQPE	698	0.652455	0.57585	-2.97703	0.000315985	-2.32457	0.00190798	0.633206	0.385975	-0.0192496	0.991687
Q9UKV3	Apoptotic chromatin condensation inducer in the nucleus	ACIN1	KISVVSATKGVPAGNSDTEGGQPGRKRRWGA	838	-0.903934	0.102008	0.42839	0.12059	-0.475544	0.0936485	-0.959786	0.0141256	-0.0558518	0.959949
Q9UKV3	Apoptotic chromatin condensation inducer in the nucleus	ACIN1	SAEKHVTQRLQPERGSPKKCEAEEAEPPAAT	729	-0.0581365	0.858945	1.02159	2.6667e-05	0.963456	5.84558e-05	-0.266443	0.134986	-0.208307	0.381994
Q9UKV3	Apoptotic chromatin condensation inducer in the nucleus	ACIN1	ERTSTSSSSVQARRLSQPESAEKHVTQRLQP	710	-0.652267	0.0047968	0.0998412	0.286751	-0.552425	0.000181007	-0.501582	0.00174305	0.150685	0.340794
Q9UKV3	Apoptotic chromatin condensation inducer in the nucleus	ACIN1	HSPRKSSSISEEKGDSDDEKPRKGERRSSRV	216	-0.0605311	0.886879	0.831832	0.000851941	0.771301	0.00161631	-0.0859166	0.72328	-0.0253855	0.96365
Q9UKV3	Apoptotic chromatin condensation inducer in the nucleus	ACIN1	VSITIDDPVRTAQVPSPPRGKISNIVHISNL	1004	-0.422588	0.216937	0.912556	0.000256048	0.489968	0.0130099	-0.337353	0.121512	0.0852351	0.865428
Q9UKX7	Nuclear pore complex protein Nup50	NUP50	RNSESESNKVAAETQSPSLFGSTKLQQESTF	221	0.11822	0.858992	-2.28307	1.42909e-05	-2.16485	3.00881e-05	0.164648	0.663383	0.0464279	0.961248
Q9ULH1	Arf-GAP with SH3 domain, ANK repeat and PH domain-containing protein 1	ASAP1	QQPSEVTLKSHPLDLSPNVQSRDAIQKQASE	1027	-0.0292272	0.957836	-0.370243	0.098961	-0.39947	0.0824461	0.155456	0.583144	0.184683	0.708139
Q9ULL5	Proline-rich protein 12	PRR12	PNSEGKDPAGAYRSPSPQGTKAPRFVPLTSI	917	-1.10341	0.0154562	3.39965	9.14253e-08	2.29624	2.12384e-06	-1.22219	0.000819649	-0.118781	0.833478
Q9ULM3	YEATS domain-containing protein 2	YEATS2	SSCKIVPQSQVPNPESPGKSFQPITMSCKIV	447	-0.0972533	0.564254	1.18021	2.44421e-07	1.08295	9.83305e-07	0.00712306	0.951481	0.104376	0.492278
Q9ULM3	YEATS domain-containing protein 2	YEATS2	KQPGQVIGATTPSTGSPTNKISTASQVSQGT	519	0.197563	0.670194	2.89001	3.98837e-07	3.08757	6.7221e-07	-0.094245	0.743054	-0.291808	0.455335
Q9ULT8	E3 ubiquitin-protein ligase HECTD1	HECTD1	SAGSTGRIPGLRRLDSSGERSHRQLIDCIRS	357	0.0276603	0.891177	1.48539	9.11983e-08	1.51306	2.34011e-07	-0.504505	0.0011712	-0.532165	0.00173868
Q9ULT8	E3 ubiquitin-protein ligase HECTD1	HECTD1	ARTNATNNMNLSRSSSDNNTNTLGRNVMSTA	1571	0.022998	0.985293	-0.285502	0.532137	-0.262504	0.57857	-0.262208	0.671061	-0.285206	0.820785
Q9ULU4	Protein kinase C-binding protein 1	ZMYND8	SASEESMDFLDKSTASPASTKTGQAGSLSGS	475	-1.0792	0.00147193	1.87651	1.72989e-07	0.797311	0.000104213	-0.043751	0.79694	1.03545	0.000248537
Q9ULU4	Protein kinase C-binding protein 1	ZMYND8	KPTNPVEIKEELKSTSPASEKADPGAVKDKA	652	0.414114	0.0222818	0.118166	0.159027	0.53228	9.62565e-05	0.108788	0.298336	-0.305327	0.0244255
Q9ULV3	Cip1-interacting zinc finger protein	CIZ1	GHFENLQKYKAAKNPSPTTRPVSRRCAINAR	838	0.581107	0.019862	0.0190449	0.865321	0.600152	0.000337435	0.557515	0.00249986	-0.0235929	0.959949
Q9ULW0	Targeting protein for Xklp2	TPX2	EEGSAHQDTAEKNASSPEKAKGRHTVPCMPP	186	0.140839	0.41381	0.65572	1.77892e-05	0.796559	7.17175e-06	0.236118	0.039052	0.0952792	0.553493
Q9ULW0	Targeting protein for Xklp2	TPX2	GLEIKSSDQPLTVPVSPKFSTRFHC______	738	1.1077	0.000479222	-1.12907	1.52479e-06	-0.0213706	0.840669	1.20133	1.23834e-05	0.0936216	0.681275
Q9ULX6	A-kinase anchor protein 8-like	AKAP8L	TADFRTKKKKRKQGGSPDEPDSKATRTDCSD	283	0.332487	0.0730813	-0.664156	2.34857e-05	-0.331669	0.00327431	0.191328	0.0971591	-0.141159	0.346439
Q9UM00	Transmembrane and coiled-coil domain-containing protein 1	TMCO1	KQSKKLEKKKETITESAGRQQKKKIERQEEK	111	0.303024	0.832026	-2.64914	0.00137068	-2.34612	0.00334213	0.203373	0.8123	-0.0996511	0.961424
Q9UM11	Fizzy-related protein homolog	FZR1	ANWSVNFHRINENEKSPSQNRKAKDATSDNG	70	0.825274	0.000449797	-0.825917	1.44341e-06	-0.000642997	0.993108	0.720013	4.0773e-05	-0.105261	0.427831
Q9UMN6	Histone-lysine N-methyltransferase 2B	KMT2B	DESVEAKRERPSGPESPVQGPRIKHVCRHAA	861	0.0208668	0.967652	0.438074	0.0371359	0.458941	0.0326713	0.11686	0.652331	0.0959928	0.868934
Q9UN30	Sex comb on midleg-like protein 1	SCML1	ESYSPTLPVSRRENNSPSNLPRPSFCMEEYQ	150	-0.0762953	0.871491	0.298868	0.155181	0.222572	0.29063	-0.280612	0.285535	-0.204317	0.639259
Q9UN37	Vacuolar protein sorting-associated protein 4A	VPS4A	KKPVKENQSEGKGSDSDSEGDNPEKKKLQEQ	97	-0.192485	0.200598	0.939882	5.44395e-07	0.747397	4.50536e-06	-0.0442135	0.65546	0.148271	0.218534
Q9UNE7	E3 ubiquitin-protein ligase CHIP	STUB1	KEEKEGGARLGAGGGSPEKSPSAQELKEQGN	19	-0.170282	0.563998	0.977125	4.96856e-05	0.806843	0.000254463	0.0840958	0.662228	0.254378	0.290782
Q9UNF1	Melanoma-associated antigen D2	MAGED2	KARKVKHLDGEEDGSSDQSQASGTTGGRRVS	191	0.193018	0.541228	0.672822	0.00107477	0.86584	0.000244133	-0.173887	0.379419	-0.366905	0.135486
Q9UNF1	Melanoma-associated antigen D2	MAGED2	ARRGKARRRAAKLQSSQEPEAPPPRDVALLQ	265	-0.563916	0.0319067	1.69511	2.96271e-07	1.13119	8.44635e-06	-0.663541	0.00162286	-0.0996242	0.729492
Q9UNL2	Translocon-associated protein subunit gamma	SSR3	QKREDAVSKEVTRKLSEADNRKMSRKEKDER	105	0.444626	0.163219	-0.214765	0.177223	0.229861	0.158816	-0.62248	0.00884136	-1.06711	0.000850935
Q9UNS1	Protein timeless homolog	TIMELESS	KEPLKAAPKKRQLLDSDEEQEEDEGRNRAPE	1173	-0.71659	0.145918	1.2702	0.000304014	0.55361	0.0372961	-0.337658	0.270704	0.378931	0.354467
Q9UNS2	COP9 signalosome complex subunit 3	COPS3	QEITVNPQFVQKSMGSQEDDSGNKPSSYS__	410	0.245709	0.83751	0.0799075	0.879381	0.325617	0.542561	0.229421	0.739668	-0.0162881	0.992478
Q9UNS2	COP9 signalosome complex subunit 3	COPS3	MGSQEDDSGNKPSSYS_______________	423	1.36255	0.000449797	-1.88625	1.33228e-07	-0.523703	0.00120228	1.13499	4.14603e-05	-0.227561	0.242333
Q9UNX4	WD repeat-containing protein 3	WDR3	IEDPEEPDPKKIKGSSPGIQDTLEAEDGAFE	241	1.57492	0.149405	-1.36638	0.0221096	0.208541	0.700446	1.38123	0.0525538	-0.193694	0.914989
Q9UNY4	Transcription termination factor 2	TTF2	SYLKRHESRGNQSGRSPNNPFSRVALEFGSE	883	0.334105	0.70616	-2.12155	0.000366039	-1.78745	0.00135391	0.604819	0.2488	0.270715	0.804459
Q9UNZ2	NSFL1 cofactor p47	NSFL1C	GQKLGSTAPQVLSTSSPAQQAENEAKASSSI	272	1.18097	0.0342425	-3.95563	1.61859e-07	-2.77466	3.18855e-06	0.998575	0.0103483	-0.182399	0.781504
Q9UNZ2	NSFL1 cofactor p47	NSFL1C	GAKEHGAVAVERVTKSPGETSKPRPFAGGGY	140	0.969208	0.000739981	-1.3005	4.34754e-07	-0.33129	0.00619101	0.93436	4.42895e-05	-0.0348487	0.917903
Q9UPN3	Microtubule-actin cross-linking factor 1, isoforms 1/2/3/5	MACF1	QAESNKAFLAELEQNSPKIQKVKEALAGLLV	4521	0.40194	0.177197	-1.84076	5.89777e-07	-1.43882	5.63202e-06	0.495679	0.0188195	0.0937392	0.812552
Q9UPN3	Microtubule-actin cross-linking factor 1, isoforms 1/2/3/5	MACF1	WLREVEEELATSGGQSPTGEQIPQFQQRQKE	5592	-0.160158	0.527808	-0.16543	0.184485	-0.325588	0.0201801	-0.261509	0.10228	-0.101351	0.726429
Q9UPN3	Microtubule-actin cross-linking factor 1, isoforms 1/2/3/5	MACF1	GSSPETLPSLLKRQGSFSEDVISHKGDLRFV	3927	-0.330445	0.295353	0.709618	0.000819769	0.379174	0.0292862	-0.267881	0.178524	0.062564	0.899431
Q9UPN3	Microtubule-actin cross-linking factor 1, isoforms 1/2/3/5	MACF1	HSSRTSLAGDTSNSSSPASTGAKTNRADPKK	7292	1.22725	0.406718	-3.35588	0.000712445	-2.12863	0.0119683	1.21007	0.190575	-0.0171774	0.993885
Q9UPN3	Microtubule-actin cross-linking factor 1, isoforms 1/2/3/5	MACF1	SSPATPASGTKVIPSSGSKLKRPTPTFHSSR	7265	-0.24622	0.804469	-1.987	0.000900937	-2.23322	0.000493664	0.0345299	0.955081	0.28075	0.812552
Q9UPN4	Centrosomal protein of 131 kDa	CEP131	GPGGSQAINNLRRSNSTTQVSQPRSGSPRPT	78	-0.23282	0.57631	1.61559	1.55949e-05	1.38276	6.8129e-05	-0.211245	0.42379	0.0215757	0.973615
Q9UPN6	Protein SCAF8	SCAF8	VKSSEPVKETVQTTQSPTPVEKETVVTTQAE	617	0.00286055	0.992036	0.211076	0.124468	0.213937	0.126158	0.0233692	0.898052	0.0205086	0.962021
Q9UPP1	Histone lysine demethylase PHF8	PHF8	RSSGSSSSGLGTVSNSPASQRTPGKRPIKRP	804	0.00918631	0.988635	4.22429	1.33228e-07	4.23347	3.66191e-07	0.031866	0.930607	0.0226796	0.978973
Q9UPQ0	LIM and calponin homology domains-containing protein 1	LIMCH1	ARASVLDTSMSAGSGSPSKTVTPKAVPMLTP	523	-0.727366	0.411857	1.55124	0.00372189	0.823876	0.0749105	0.632375	0.248895	1.35974	0.0511723
Q9UPQ0	LIM and calponin homology domains-containing protein 1	LIMCH1	FDSLDSFGSRSRQTPSPDVVLRGSSDGRGSD	217	-0.575909	0.149685	2.32784	8.33744e-07	1.75193	1.0233e-05	0.0637104	0.811031	0.639619	0.0431152
Q9UPQ0	LIM and calponin homology domains-containing protein 1	LIMCH1	DKWQDDLARWKSRRRSVSQDLIKKEEERKKM	377	-0.889254	0.0166825	0.591521	0.00374541	-0.297733	0.0893271	-0.0293451	0.897362	0.859909	0.00404928
Q9UPR3	Protein SMG5	SMG5	______________MSQGPPTGESSEPEAKV	2	-0.616844	0.00450093	1.37005	1.39747e-07	0.753211	1.30706e-05	-0.490654	0.00134172	0.12619	0.4054
Q9UPT8	Zinc finger CCCH domain-containing protein 4	ZC3H4	AASLKDVFKGFDPTASPFCQ___________	1299	-0.40789	0.6783	-2.58204	0.000195811	-2.98993	9.38086e-05	-0.252887	0.680806	0.155003	0.921217
Q9UPT8	Zinc finger CCCH domain-containing protein 4	ZC3H4	KQTPKTGSGSPFAGNSPAREGEQDAASLKDV	1275	0.0623692	0.958941	2.5927	0.000219458	2.65507	0.00023676	-0.338582	0.583144	-0.400951	0.708139
Q9UPU5	Ubiquitin carboxyl-terminal hydrolase 24	USP24	EAEDLSLSAPSSPEISPQSSPRPHRPNNDRL	2077	-0.0474673	0.97643	3.30331	0.00015341	3.25584	0.000219052	-0.330674	0.662658	-0.283207	0.867829
Q9UPU5	Ubiquitin carboxyl-terminal hydrolase 24	USP24	EVGENGRSVDQGGGGSPRKKVALTENYELVG	1943	-0.0532753	0.858992	0.710896	0.000222423	0.65762	0.000466666	0.0171957	0.922642	0.070471	0.854092
Q9UPU5	Ubiquitin carboxyl-terminal hydrolase 24	USP24	WNAYMLFYQRVSDQNSPVLPKKSRVSVVRQE	2047	-0.178044	0.305713	0.762141	6.68498e-06	0.584097	6.68026e-05	-0.207795	0.0659404	-0.0297514	0.920016
Q9UQ35	Serine/arginine repetitive matrix protein 2	SRRM2	;PSAPSQSRMTSERAPSPSSRMGQAPSQSLLP	2426	-0.153054	0.482857	1.23968	9.72824e-07	1.08663	4.23116e-06	-0.161294	0.233164	-0.00824019	0.980385
Q9UQ35	Serine/arginine repetitive matrix protein 2	SRRM2	DKPRAAPRAQSGSDSSPEPKAPAPRALPRRS	1621	-0.613828	0.00816108	2.97532	4.37601e-09	2.36149	3.96547e-08	-0.274345	0.0397673	0.339484	0.0348067
Q9UQ35	Serine/arginine repetitive matrix protein 2	SRRM2	FSRPSMSPTPLDRCRSPGMLEPLGSSRTPMS	2132	-0.536249	0.0672812	1.50387	1.66952e-06	0.967616	6.07887e-05	-0.515815	0.0127628	0.0204337	0.962023
Q9UQ35	Serine/arginine repetitive matrix protein 2	SRRM2	KDKDKKEKSATRPSPSPERSSTGPEPPAPTP	353	0.00932705	0.986278	0.84476	0.00141304	0.854087	0.00152576	0.134001	0.617038	0.124674	0.819618
Q9UQ35	Serine/arginine repetitive matrix protein 2	SRRM2	WGGPHFSPEHKELSNSPLRENSFGSPLEFRN	1320	-1.19931	0.00166695	2.96503	2.37923e-08	1.76572	1.31685e-06	-0.162715	0.370572	1.0366	0.000576197
Q9UQ35	Serine/arginine repetitive matrix protein 2	SRRM2	HKELSNSPLRENSFGSPLEFRNSGPLGTEMN	1329	-0.647409	0.0200969	1.2556	2.80593e-06	0.608189	0.000642353	0.932548	0.00021023	1.57996	2.34473e-05
Q9UQ35	Serine/arginine repetitive matrix protein 2	SRRM2	SPELNNKCLTPQRERSGSESSVDQKTVARTP	1517	-0.0240951	0.967404	-0.0850829	0.694158	-0.109178	0.621412	-0.0651202	0.826413	-0.0410251	0.959949
Q9UQ35	Serine/arginine repetitive matrix protein 2	SRRM2	ELNNKCLTPQRERSGSESSVDQKTVARTPLG	1519	-0.19527	0.509714	0.69595	0.000533649	0.50068	0.00484625	-0.305878	0.100751	-0.110608	0.747271
Q9UQ35	Serine/arginine repetitive matrix protein 2	SRRM2	VLDAVPRTPSRERSSSASSPEMKDGLPRTPS	1421	-1.56533	0.0119916	4.11719	1.69319e-07	2.55186	7.76965e-06	-1.59303	0.00105238	-0.0276949	0.975378
Q9UQ35	Serine/arginine repetitive matrix protein 2	SRRM2	AVPRTPSRERSSSASSPEMKDGLPRTPSRRS	1424	-0.227271	0.269986	2.12937	2.39011e-08	1.9021	1.52281e-07	0.10792	0.413011	0.335191	0.0423187
Q9UQ35	Serine/arginine repetitive matrix protein 2	SRRM2	ASRSPIRQDRGEFSASPMLKSGMSPEQSRFQ	1124	0.262541	0.335344	0.338589	0.0234904	0.60113	0.00108041	0.285471	0.101765	0.0229309	0.960941
Q9UQ35	Serine/arginine repetitive matrix protein 2	SRRM2	APFSEPGTTSTQRPSSPETATKQPSSPYEDK	323	-0.0356138	0.873141	1.59702	1.01906e-07	1.56141	3.34811e-07	-0.0656338	0.611117	-0.03002	0.929942
Q9UQ35	Serine/arginine repetitive matrix protein 2	SRRM2	DIPRTPSRGRSECDSSPEPKALPQTPRPRSR	1483	-0.266519	0.282333	1.8503	1.72564e-07	1.58378	1.10249e-06	-0.317932	0.0523747	-0.0514132	0.89605
Q9UQ35	Serine/arginine repetitive matrix protein 2	SRRM2	SKEKMALPPQEDATASPPRQKDKFSPFPVQD	1179	0.057908	0.765935	0.459334	0.000317861	0.517242	0.000179216	-0.0444161	0.703705	-0.102324	0.539356
Q9UQ35	Serine/arginine repetitive matrix protein 2	SRRM2	TSARMAPALSGANLTSPRVPLSAYERVSGRT	2382	1.01434	0.00113967	-2.20307	3.09202e-08	-1.18873	3.04689e-06	1.16453	2.38398e-05	0.150195	0.447453
Q9UQ35	Serine/arginine repetitive matrix protein 2	SRRM2	APSQSLLPPAQDQPRSPVPSAFSDQSRCLIA	2449	-0.0852281	0.73057	0.805622	3.4783e-05	0.720394	0.00010916	0.0287152	0.850458	0.113943	0.633242
Q9UQ35	Serine/arginine repetitive matrix protein 2	SRRM2	RDKSHSHTPSRRMGRSRSPATAKRGRSRSRT	484	-0.0528313	0.90884	1.24476	8.01248e-05	1.19193	0.000145428	-0.0819557	0.751381	-0.0291244	0.962023
Q9UQ35	Serine/arginine repetitive matrix protein 2	SRRM2	ALNSSRMSCFSRPSMSPTPLDRCRSPGMLEP	2123	0.316223	0.418184	1.13725	0.00013021	1.45347	3.08697e-05	0.0758138	0.765364	-0.240409	0.495791
Q9UQ35	Serine/arginine repetitive matrix protein 2	SRRM2	PKVKSGTPPRQGSITSPQANEQSVTPQRRSC	857	0.443325	0.461951	1.04231	0.00413111	1.48564	0.000515923	0.0602545	0.882619	-0.38307	0.476785
Q9UQ35	Serine/arginine repetitive matrix protein 2	SRRM2	TQRPSSPETATKQPSSPYEDKDKDKKEKSAT	333	0.00367279	0.994401	1.33741	0.000207665	1.34108	0.000258761	0.0831468	0.8	0.079474	0.923483
Q9UQ35	Serine/arginine repetitive matrix protein 2	SRRM2	RSDTSSPEVRQSHSESPSLQSKSQTSPKGGR	1083	0.470946	0.116898	0.598667	0.0016214	1.06961	4.03847e-05	0.439998	0.029139	-0.0309474	0.959949
Q9UQ35	Serine/arginine repetitive matrix protein 2	SRRM2	VKPETPPRQSHSGSISPYPKVKAQTPPGPSL	994	-0.124671	0.706764	0.863063	0.000204422	0.738392	0.000723	-0.216171	0.272597	-0.0914992	0.833068
Q9UQ35	Serine/arginine repetitive matrix protein 2	SRRM2	DSRSLSYSPVERRRPSPQPSPRDQQSSSSER	2702	-0.490889	0.439612	1.4523	0.000691483	0.961414	0.00939939	-0.483104	0.223359	0.00778497	0.993697
Q9UQ35	Serine/arginine repetitive matrix protein 2	SRRM2	PKTKSRTPPRRRSSRSSPELTRKARLSRRSR	1693	-0.179328	0.535523	2.46619	7.0921e-08	2.28686	3.31445e-07	0.313925	0.0871593	0.493253	0.0324615
Q9UQ35	Serine/arginine repetitive matrix protein 2	SRRM2	NEQSVTPQRRSCFESSPDPELKSRTPSRHSC	876	-0.0831583	0.724768	1.09591	2.62532e-06	1.01275	7.77795e-06	-0.0306284	0.833552	0.0525299	0.871923
Q9UQ35	Serine/arginine repetitive matrix protein 2	SRRM2	VKPSASPQERSESDSSPDSKAKTRTPLRQRS	1562	-0.603871	0.0472662	3.14808	1.99664e-08	2.54421	1.9177e-07	-0.233974	0.20301	0.369897	0.107979
Q9UQ35	Serine/arginine repetitive matrix protein 2	SRRM2	DTLRTPPRERSGAGSSPETKEQNSALPTSSQ	1219	0.128368	0.664455	0.643635	0.000760058	0.772003	0.000274403	0.140094	0.438863	0.0117263	0.979244
Q9UQ35	Serine/arginine repetitive matrix protein 2	SRRM2	DSKSRLSPRRSRSGSSPEVKDKPRAAPRAQS	1601	-0.454531	0.0732383	1.72654	2.50211e-07	1.27201	3.54075e-06	0.00512055	0.975913	0.459652	0.0220854
Q9UQ35	Serine/arginine repetitive matrix protein 2	SRRM2	DGLPRTPSRRSRSGSSPGLRDGSGTPSRHSL	1444	-0.402599	0.211409	1.98496	5.89777e-07	1.58236	4.88957e-06	-0.0154706	0.944682	0.387129	0.127996
Q9UQ35	Serine/arginine repetitive matrix protein 2	SRRM2	SRSGSSQELDVKPSASPQERSESDSSPDSKA	1552	-0.71994	0.241409	1.7852	0.000141678	1.06526	0.00474558	-0.15116	0.7095	0.568781	0.255345
Q9UQ35	Serine/arginine repetitive matrix protein 2	SRRM2	PCPKQKSQTPPRRSRSGSSQPKAKSRTPPRR	799	0.642518	0.19786	-0.342429	0.16965	0.300089	0.234014	0.445027	0.156343	-0.19749	0.734304
Q9UQ35	Serine/arginine repetitive matrix protein 2	SRRM2	GRSRSSSPVTELASRSPIRQDRGEFSASPML	1112	0.124683	0.639899	1.14947	5.7888e-06	1.27415	4.72225e-06	-0.153391	0.34552	-0.278074	0.173125
Q9UQ35	Serine/arginine repetitive matrix protein 2	SRRM2	KALPQTPRPRSRSPSSPELNNKCLTPQRERS	1502	-0.28616	0.539124	-1.80016	1.5217e-05	-2.08632	8.60517e-06	0.414503	0.152467	0.700663	0.0544059
Q9UQ35	Serine/arginine repetitive matrix protein 2	SRRM2	RSRSRTSPITRRRSRSRTSPVTRRRSRSRTS	1984	-0.0344638	0.96627	1.36055	0.000940313	1.32609	0.00130728	-0.46112	0.233164	-0.426657	0.427831
Q9UQ35	Serine/arginine repetitive matrix protein 2	SRRM2	SKSQTSPKGGRSRSSSPVTELASRSPIRQDR	1103	-0.356066	0.143532	0.940289	1.59013e-05	0.584223	0.0005978	-0.349088	0.0324135	0.00697761	0.985158
Q9UQ35	Serine/arginine repetitive matrix protein 2	SRRM2	VKSSTPPRQSPSRSSSPQPKVKAIISPRQRS	914	-0.311488	0.235344	1.7344	3.81157e-07	1.42291	2.67914e-06	-0.107113	0.529011	0.204374	0.353218
Q9UQ35	Serine/arginine repetitive matrix protein 2	SRRM2	ADSRTPAAAAAMNLASPRTAVAPSAVNLADP	2272	0.475166	0.269986	-1.17381	0.000222423	-0.698648	0.00685619	0.561341	0.0489191	0.0861758	0.899227
Q9UQ35	Serine/arginine repetitive matrix protein 2	SRRM2	PRVPLSAYERVSGRTSPPLLDRARSRTPPSA	2398	-0.353381	0.380102	1.08173	0.000219056	0.728353	0.00339305	-0.260733	0.296447	0.0926474	0.876144
Q9UQ35	Serine/arginine repetitive matrix protein 2	SRRM2	NVESRLLPRYSHSGSSSPDTKVKPETPPRQS	973	-0.0531558	0.926924	1.74309	2.88324e-05	1.68994	5.16218e-05	-0.355413	0.240526	-0.302257	0.492278
Q9UQ80	Proliferation-associated protein 2G4	PA2G4	EMEVQDAELKALLQSSASRKTQKKKKKKASK	361	1.33067	0.125992	-3.30495	1.69706e-05	-1.97429	0.000819767	0.432403	0.429894	-0.898264	0.188637
Q9UQB8	Brain-specific angiogenesis inhibitor 1-associated protein 2	BAIAP2	YSPWADRKAAQPKSLSPPQSQSKLSDSYSNT	325	0.0987133	0.8903	-0.444342	0.160555	-0.345628	0.277607	0.887736	0.0366657	0.789023	0.113582
Q9UQE7	Structural maintenance of chromosomes protein 3	SMC3	KATLVMKKGDVEGSQSQDEGEGSGESERGSG	1067	-0.155864	0.546809	0.309074	0.0268338	0.153209	0.237509	-0.0959306	0.563797	0.0599339	0.876144
Q9UQR1	Zinc finger protein 148	ZNF148	FPLVNVNDNRAGMTSSPDATTGQTFG_____	784	-0.293765	0.0870908	0.301354	0.00325294	0.00758901	0.929026	-0.446049	0.00162773	-0.152283	0.2616
Q9Y217	Myotubularin-related protein 6	MTMR6	TLLPVNDALRTIEGSSPADNRYSEYAEEFSK	589	0.151385	0.893765	-2.2134	0.000900982	-2.06202	0.00165053	0.372276	0.565084	0.220891	0.882012
Q9Y248	DNA replication complex GINS protein PSF2	GINS2	MYKLRTNLQPLESTQSQDF____________	182	-1.61545	0.0013274	1.54316	1.01919e-05	-0.0722862	0.697563	-0.872172	0.0031929	0.743276	0.0153562
Q9Y281	Cofilin-2	CFL2	_____________MASGVTVNDEVIKVFNDM	3	-0.590673	0.242953	-0.690407	0.0155443	-1.28108	0.000459154	-0.296944	0.355938	0.293729	0.536793
Q9Y2D5	A-kinase anchor protein 2	AKAP2	SQPRDALGDSLQVPVSPSSTTSSRCSSRDGE	152	-1.03404	0.00973574	1.75587	2.51479e-06	0.72183	0.00165053	-0.0343017	0.884602	0.99974	0.00228034
Q9Y2D5	A-kinase anchor protein 2	AKAP2	GPPEDSGASAAKGQKSPGALETPSAAGSQGN	393	-0.90758	0.00283166	0.184991	0.128795	-0.722589	0.000144629	0.245164	0.109924	1.15274	0.000102349
Q9Y2D5	A-kinase anchor protein 2	AKAP2	EEELKRQRQVLQSTQSPRTKNAPSLPSRTCY	748	-1.05969	0.00118072	0.384104	0.00623265	-0.675586	0.000209	0.280824	0.068469	1.34051	4.19174e-05
Q9Y2F5	Little elongation complex subunit 1	ICE1	IHKLTRGLCIERLSASPAQEKEAAPGKSELC	516	-0.231247	0.145489	-0.0837098	0.280387	-0.314957	0.00200181	0.144017	0.147758	0.375264	0.00622685
Q9Y2F5	Little elongation complex subunit 1	ICE1	HLRPHRVEPTLVTENSGNKTGMSTVAKCDGE	892	1.13931	0.00191166	-1.08246	1.78682e-05	0.0568502	0.6876	1.319	4.32864e-05	0.179692	0.477565
Q9Y2J4	Angiomotin-like protein 2	AMOTL2	QRQAGAPGGSSGSGGSPELSALRLSEQLREK	540	-0.170489	0.525227	0.315499	0.0280502	0.14501	0.277141	-0.397745	0.0278981	-0.227256	0.29527
Q9Y2K7	Lysine-specific demethylase 2A	KDM2A	GGEEEEEEEEEEEDDSAEEGGAARLNGRGSW	869	-0.035861	0.969229	1.59309	0.000716813	1.55723	0.000989263	-0.331018	0.457166	-0.295157	0.705897
Q9Y2U8	Inner nuclear membrane protein Man1	LEMD3	LAMNDRAAAAGSLDRSRNLEEAAAAEQGGGC	331	2.04666	0.116898	-2.0484	0.00673641	-0.00173959	0.997644	-0.93622	0.244269	-2.98288	0.00717481
Q9Y2U8	Inner nuclear membrane protein Man1	LEMD3	APPAPLAASEVTNSNSAERRKPHSWWGARRP	187	0.712064	0.546605	-3.11607	0.000251952	-2.404	0.00166983	0.946539	0.198466	0.234474	0.898926
Q9Y2U8	Inner nuclear membrane protein Man1	LEMD3	AAAAEQGGGCDQVDSSPVPRYRVNAKKLTPL	352	1.67282	0.00865103	-4.20814	1.4877e-07	-2.53533	8.27385e-06	2.04373	0.000205393	0.370914	0.446402
Q9Y2U8	Inner nuclear membrane protein Man1	LEMD3	SHLRLRTGLTNSQGSS_______________	911	-0.0863146	0.894781	-0.72153	0.0234761	-0.807845	0.0147363	-0.365041	0.317339	-0.278726	0.645827
Q9Y2U8	Inner nuclear membrane protein Man1	LEMD3	GSLLKTNNHIGGGAFSVDSPRIYSNSLPPSA	399	-0.0295491	0.983229	-0.977849	0.0491463	-1.0074	0.0463644	0.0930788	0.884555	0.122628	0.945672
Q9Y2V2	Calcium-regulated heat stable protein 1	CARHSP1	LPTRRTRTFSATVRASQGPVYKGVCKCFCRS	58	0.427324	0.529568	-3.71635	1.23079e-06	-3.28902	4.94985e-06	1.02171	0.0265439	0.59439	0.278228
Q9Y2V2	Calcium-regulated heat stable protein 1	CARHSP1	QASVGLLDTPRSRERSPSPLRGNVVPSPLPT	30	0.207229	0.704029	0.719588	0.0137313	0.926818	0.00386644	0.0345436	0.922031	-0.172686	0.795248
Q9Y2V2	Calcium-regulated heat stable protein 1	CARHSP1	SRERSPSPLRGNVVPSPLPTRRTRTFSATVR	41	0.0966709	0.650252	0.388388	0.00238972	0.485059	0.000679246	0.225896	0.0859712	0.129225	0.482257
Q9Y2V2	Calcium-regulated heat stable protein 1	CARHSP1	NVVPSPLPTRRTRTFSATVRASQGPVYKGVC	52	0.159368	0.544111	0.478759	0.00285374	0.638127	0.000535222	0.128149	0.438863	-0.0312194	0.954382
Q9Y2W1	Thyroid hormone receptor-associated protein 3	THRAP3	YGTGSASRASAVSELSPRERSPALKSPLQSV	243	0.0866349	0.57631	0.550976	2.95498e-05	0.637611	1.53523e-05	0.286677	0.0110218	0.200042	0.0990785
Q9Y2W1	Thyroid hormone receptor-associated protein 3	THRAP3	KSAKEKKSSSKDSRPSQAAGDNQGDEAKEQT	190	-0.169648	0.748007	-0.853259	0.00384644	-1.02291	0.0014571	-0.0730679	0.822613	0.0965798	0.899227
Q9Y2W1	Thyroid hormone receptor-associated protein 3	THRAP3	QTNTDKEKIKEKGSFSDTGLGDGKMKSDSFA	379	-0.512117	0.0100457	0.712505	1.15508e-05	0.200388	0.035324	0.0673046	0.554624	0.579422	0.000893411
Q9Y2W1	Thyroid hormone receptor-associated protein 3	THRAP3	AKNKKSPEIHRRIDISPSTFRKHGLAHDEMK	682	-0.44998	0.126799	1.28524	6.14307e-06	0.835264	0.000190421	-0.134157	0.469809	0.315823	0.169398
Q9Y2W1	Thyroid hormone receptor-associated protein 3	THRAP3	GSGSLSPSKKSPVGKSPPSTGSTYGSSQKEE	320	-0.492141	0.137743	1.78538	1.42278e-06	1.29324	2.19416e-05	-0.151859	0.470216	0.340282	0.195562
Q9Y2W1	Thyroid hormone receptor-associated protein 3	THRAP3	VESSKRKSAKEKKSSSKDSRPSQAAGDNQGD	184	-0.118553	0.539879	1.15923	6.60497e-07	1.04068	2.55232e-06	0.0685292	0.579657	0.187082	0.221222
Q9Y2W1	Thyroid hormone receptor-associated protein 3	THRAP3	NFRVTAYKAVQEKSSSPPPRKTSESRDKLGA	535	-0.163068	0.378015	0.839305	4.65074e-06	0.676237	3.34921e-05	-0.0101484	0.934055	0.15292	0.31025
Q9Y314	Nitric oxide synthase-interacting protein	NOSIP	SRPLNPFTAKALSGTSPDDVQPGPSVGPPSK	138	0.814778	0.0334784	-2.44165	3.30297e-07	-1.62687	9.17764e-06	0.492401	0.0413591	-0.322377	0.277546
Q9Y383	Putative RNA-binding protein Luc7-like 2	LUC7L2	RFRDQDLASCDRDRSSRDRSPRDRDRKDKKR	354	-0.367211	0.23296	1.21391	1.50541e-05	0.846697	0.000262629	-0.268624	0.166682	0.0985873	0.807167
Q9Y388	RNA-binding motif protein, X-linked 2	RBMX2	EKADREVQAEQPSSSSPRRKTVKEKDDTGPK	188	-0.26384	0.288183	1.67165	3.38874e-07	1.40781	2.02664e-06	-0.195298	0.213025	0.0685424	0.847473
Q9Y3P9	Rab GTPase-activating protein 1	RABGAP1	LVSRQGDETPSTNNGSDDEKTGLKIVGNGSE	42	-0.0592712	0.797613	0.68295	5.94687e-05	0.623678	0.00015312	-0.130693	0.32127	-0.0714217	0.788054
Q9Y3T9	Nucleolar complex protein 2 homolog	NOC2L	REAREAARSPDKPGGSPSASRRKGRASEHKD	56	-1.2153	0.0334784	3.53805	3.97196e-07	2.32275	1.21215e-05	-1.36767	0.00217616	-0.152364	0.841134
Q9Y446	Plakophilin-3	PKP3	SRGQYHTLQAGFSSRSQGLSGDKTSGFRPIA	95	-0.0583347	0.884339	-1.14293	6.14307e-05	-1.20126	6.01743e-05	-0.268254	0.225421	-0.20992	0.519194
Q9Y478	5'-AMP-activated protein kinase subunit beta-1	PRKAB1	AALERHGGHKTPRRDSSGGTKDGDRPKILMD	24	-0.169114	0.399619	0.11022	0.260587	-0.0588939	0.555897	-0.203753	0.107678	-0.0346385	0.916736
Q9Y4B5	Microtubule cross-linking factor 1	MTCL1	PAAPRSPNLAGKAPPSPGSLAAPGRLSRRSG	87	1.19707	0.184636	-1.75831	0.00201792	-0.561238	0.2191	0.764032	0.178501	-0.433041	0.645827
Q9Y4C1	Lysine-specific demethylase 3A	KDM3A	DVSNAPEVKAGVNSDSPNNCSGKKVEPSALA	463	0.927453	0.0796711	-1.73481	4.58936e-05	-0.807353	0.00800419	0.973977	0.0102516	0.0465243	0.959949
Q9Y4C1	Lysine-specific demethylase 3A	KDM3A	PSKDPRQQSTPQAANSPPNLGAKIPQGCHKQ	325	1.29934	0.000699652	0.0400392	0.757483	1.33938	4.12631e-06	1.10147	9.00281e-05	-0.197877	0.377049
Q9Y4E8	Ubiquitin carboxyl-terminal hydrolase 15	USP15	PKSPGASNFSTLPKISPSSLSNNYNNMNNRN	242	1.47464	0.000449797	-2.83605	2.22654e-08	-1.36141	3.94758e-06	1.49307	1.42693e-05	0.0184327	0.96365
Q9Y4F1	FERM, RhoGEF and pleckstrin domain-containing protein 1	FARP1	SAGEPGSHPSPAPRRSPAGNKQADGAASAPT	433	0.331351	0.0915132	-0.306266	0.00662796	0.0250847	0.793976	0.366077	0.00983428	0.0347264	0.914266
Q9Y4F1	FERM, RhoGEF and pleckstrin domain-containing protein 1	FARP1	LAEKSSSPAPEFLASSPPDNKSPDEATAADQ	872	-0.0882619	0.871491	0.334651	0.165932	0.246389	0.30916	0.0550798	0.864167	0.143342	0.828972
Q9Y4G6	Talin-2	TLN2	SGSSGPETFNVGSMPSPQQQVMVGQMHRGHM	473	0.739783	0.535849	-2.9435	0.000398707	-2.20372	0.00302004	0.930658	0.209983	0.190875	0.923877
Q9Y4G8	Rap guanine nucleotide exchange factor 2	RAPGEF2	SDHSTKYNRQNQSRESLEQAQSRASWASSTG	1316	-0.111483	0.934335	-1.68034	0.00958362	-1.79183	0.00748408	-0.326209	0.661343	-0.214726	0.90878
Q9Y4H2	Insulin receptor substrate 2	IRS2	GGVGVGPGGGDEPPTSPRQLQPAPPLAPQGR	1203	-0.338042	0.198026	0.931589	3.11199e-05	0.593547	0.00091754	0.312025	0.0665188	0.650068	0.00488214
Q9Y4H2	Insulin receptor substrate 2	IRS2	MDRPLSHCGRSYRRVSGDAAQDLDRGLRKRT	560	-0.203327	0.605935	-0.462491	0.0279208	-0.665818	0.00484847	0.0122401	0.964981	0.215568	0.553493
Q9Y4H2	Insulin receptor substrate 2	IRS2	TPPAAKCSSCRVRTASEGDGGAAAGAAAAGA	365	0.0871388	0.894781	0.817334	0.0134338	0.904473	0.00869337	0.236282	0.532273	0.149143	0.865045
Q9Y4R8	Telomere length regulation protein TEL2 homolog	TELO2	LLLLQRLKNRLLPPASP______________	836	0.03576	0.895395	0.294555	0.0257887	0.330315	0.0162045	0.0656028	0.680552	0.0298428	0.951589
Q9Y520	Protein PRRC2C	PRRC2C	PPNVACWRDGGKAAGSPSSSDQDEKLPGQDE	187	0.358302	0.311759	-2.55012	2.12632e-07	-2.19181	1.31685e-06	0.376958	0.09758	0.0186557	0.973615
Q9Y520	Protein PRRC2C	PRRC2C	RSTTPTSSPFRATSTSPNSQSSKMNSIVYQK	2694	-0.405918	0.0154162	0.723852	3.33051e-06	0.317935	0.00139897	-0.260645	0.0151697	0.145273	0.227728
Q9Y520	Protein PRRC2C	PRRC2C	VKDAQQVEPEGQEKPSPATVRSTDPVTTKET	2143	0.645027	0.323088	-2.70492	1.02519e-05	-2.0599	0.00010246	0.672526	0.106592	0.0274994	0.978973
Q9Y520	Protein PRRC2C	PRRC2C	MIPPKPLMRRDQMEGSPNSSESFEHIARSAR	779	0.73697	0.447344	-2.30592	0.000523481	-1.56895	0.00647156	0.401324	0.517741	-0.335647	0.781381
Q9Y520	Protein PRRC2C	PRRC2C	QPRAGPIKAQKLPDLSPVENKEHKPGPIGKE	2105	0.382897	0.414526	-2.20415	3.75964e-06	-1.82126	2.27383e-05	0.353245	0.226502	-0.029652	0.966617
Q9Y520	Protein PRRC2C	PRRC2C	NSCNKEEEPVFTRQDSNRSEKEATPVVHETE	633	0.278336	0.424444	1.84824	1.58754e-06	2.12658	1.31914e-06	-0.32909	0.134188	-0.607426	0.0302212
Q9Y520	Protein PRRC2C	PRRC2C	ENVLPPKREIAKRSFSSQRPVDRQNRRGNNG	1544	-0.172781	0.655696	0.441141	0.0293388	0.26836	0.160524	0.0393605	0.875599	0.212142	0.546042
Q9Y570	Protein phosphatase methylesterase 1	PPME1	RVSMVGQVKQCEGITSPEGSKSIVEGIIEEE	243	0.955618	0.00816108	-2.93164	3.87743e-08	-1.97602	1.08343e-06	0.549981	0.0138938	-0.405637	0.0967874
Q9Y5B0	RNA polymerase II subunit A C-terminal domain phosphatase	CTDP1	ESSSESEGTKSSSSASDGESEGKRGRQKPKA	474	0.105637	0.651136	0.689325	9.33617e-05	0.794962	4.68239e-05	0.326858	0.0318632	0.221221	0.220358
Q9Y5B6	PAX3- and PAX7-binding protein 1	PAXBP1	EPGKGRLVREDENDASDDEDDDEKRRIVFSV	262	-0.031914	0.952419	0.818163	0.00285396	0.786249	0.00408648	-0.0390304	0.896958	-0.00711647	0.991734
Q9Y5B9	FACT complex subunit SPT16	SUPT16H	REAEEKEKEGIVKQDSLVINLNRSNPKLKDL	650	1.26583	0.127859	-1.33107	0.00601009	-0.0652431	0.876992	-1.09275	0.0442947	-2.35858	0.00221488
Q9Y5J1	U3 small nucleolar RNA-associated protein 18 homolog	UTP18	LLRRLRGPRVQEHEDSGDSEVENEAKGNFPP	121	0.0220082	0.975434	1.01691	0.00185087	1.03892	0.00187979	-0.122404	0.715448	-0.144412	0.841441
Q9Y5S9	RNA-binding protein 8A	RBM8A	GSEEGSRARMREDYDSVEQDGDEPGPQRSVE	56	0.282736	0.191571	0.184302	0.0961822	0.467037	0.00123973	-0.203549	0.136954	-0.486285	0.00840951
Q9Y5T5	Ubiquitin carboxyl-terminal hydrolase 16	USP16	REKKENMAKENPPMNSPCQITVKGLSNLGNT	189	0.805547	0.104161	-3.02104	5.87474e-07	-2.21549	8.63794e-06	0.40863	0.184928	-0.396917	0.326265
Q9Y5Y5	Peroxisomal membrane protein PEX16	PEX16	PLDRETQAQPPDGDHSPGNHEQSYVGKRSNR	158	1.33528	0.00256936	-3.53701	2.49867e-08	-2.20174	1.13568e-06	0.498658	0.034077	-0.836618	0.00595511
Q9Y608	Leucine-rich repeat flightless-interacting protein 2	LRRFIP2	TRPSSRNSASATTPLSGNSSRRGSGDTSSLI	320	-0.463538	0.077425	2.10513	9.30124e-08	1.64159	9.94561e-07	0.387263	0.0270317	0.850801	0.000859116
Q9Y608	Leucine-rich repeat flightless-interacting protein 2	LRRFIP2	SRNSASATTPLSGNSSRRGSGDTSSLIDPDT	324	-1.02766	0.002517	2.75863	2.36492e-08	1.73097	9.83305e-07	-0.0809204	0.643739	0.94674	0.000609154
Q9Y608	Leucine-rich repeat flightless-interacting protein 2	LRRFIP2	ASATTPLSGNSSRRGSGDTSSLIDPDTSLSE	328	-0.678729	0.00902996	1.82065	1.07142e-07	1.14192	4.13726e-06	-0.00682791	0.966242	0.671901	0.00180153
Q9Y613	FH1/FH2 domain-containing protein 1	FHOD1	ERRKPSSEEGKRSRRSLEGGGCPARAPEPGP	367	-0.294773	0.277345	-0.593342	0.00100356	-0.888115	8.22026e-05	-0.186593	0.275213	0.10818	0.734304
Q9Y618	Nuclear receptor corepressor 2	NCOR2	VTTREPTPRLQEGSLSSSKASQDRKLTSTPR	1575	1.28611	0.260319	-4.27873	2.19205e-05	-2.99262	0.000365405	1.13204	0.120564	-0.154076	0.944905
Q9Y618	Nuclear receptor corepressor 2	NCOR2	STTGSKKHDVRSLIGSPGRTFPPVHPLDVMA	1479	0.0298936	0.910487	0.0300649	0.790914	0.0599585	0.602557	-0.0476327	0.751381	-0.0775263	0.792806
Q9Y618	Nuclear receptor corepressor 2	NCOR2	YRDGEQTEPSRMGSKSPGNTSQPPAFFSKLT	2258	-0.579827	0.0222583	1.31785	1.09736e-06	0.738026	0.00010246	-0.614597	0.00174458	-0.0347696	0.932318
Q9Y6A5	Transforming acidic coiled-coil-containing protein 3	TACC3	TAPTNHLVAGRAMTLSPQEEVAAGQMASSSR	317	0.369546	0.423235	-1.61364	3.33555e-05	-1.24409	0.000279153	0.636561	0.0382267	0.267015	0.532399
Q9Y6A5	Transforming acidic coiled-coil-containing protein 3	TACC3	GGDTKSGCSEAQPPESPETRLGQPAAEQLHA	434	0.822245	0.00120117	-2.25356	1.01592e-08	-1.43132	3.76779e-07	1.17066	7.27438e-06	0.348419	0.0214443
Q9Y6D6	Brefeldin A-inhibited guanine nucleotide-exchange protein 1	ARFGEF1	VAYTPSLPDDRLSVSSNDTQESGNSSGPSPG	397	-0.258577	0.313519	1.8346	2.23051e-07	1.57602	1.31914e-06	-0.524045	0.00710288	-0.265468	0.196036
Q9Y6D6	Brefeldin A-inhibited guanine nucleotide-exchange protein 1	ARFGEF1	VSSNDTQESGNSSGPSPGAKFSHILQKDAFL	410	1.50019	0.028922	-4.16808	4.16167e-07	-2.6679	1.50321e-05	0.380312	0.348218	-1.11988	0.0306484
Q9Y6D9	Mitotic spindle assembly checkpoint protein MAD1	MAD1L1	LYAEHPGDCLIFKATSPSGSKMQLLETEFSH	669	0.211326	0.510275	-1.06045	4.73591e-05	-0.849125	0.000298398	0.0869793	0.676438	-0.124347	0.736107
Q9Y6G9	Cytoplasmic dynein 1 light intermediate chain 1	DYNC1LI1	RDFQEYVEPGEDFPASPQRRNTASQEDKDDS	207	0.247075	0.265172	0.0610479	0.573421	0.308123	0.0151004	0.39236	0.0141343	0.145285	0.461708
Q9Y6G9	Cytoplasmic dynein 1 light intermediate chain 1	DYNC1LI1	RITRKPVTVSPTTPTSPTEGEAS________	516	-0.682567	0.0398352	1.55797	2.8149e-06	0.875406	0.0002439	-0.15664	0.437716	0.525927	0.0377872
Q9Y6G9	Cytoplasmic dynein 1 light intermediate chain 1	DYNC1LI1	LAKQPPTAAGRPVDASPRVPGGSPRTPNRSV	398	0.77443	0.414748	-3.27468	3.67755e-05	-2.50025	0.000327762	0.987392	0.10193	0.212963	0.87967
Q9Y6G9	Cytoplasmic dynein 1 light intermediate chain 1	DYNC1LI1	PRTPNRSVSSNVASVSPIPAGSKKIDPNMKA	421	1.02659	0.0870908	-3.20977	1.2996e-06	-2.18318	3.06693e-05	1.2975	0.00434925	0.270908	0.659986
Q9Y6I7	WD repeat and SOCS box-containing protein 1	WSB1	KNVTNSSSLRLPRQNSDGGQKNKPREHIIDC	91	-0.28493	0.221378	1.79349	1.4047e-07	1.50856	9.83305e-07	-0.696455	0.00082526	-0.411525	0.0297805
Q9Y6K1	DNA (cytosine-5)-methyltransferase 3A	DNMT3A	NGDLEKRSEPQPEEGSPAGGQKGGAPAEGEG	105	-0.413284	0.243252	0.390376	0.0400361	-0.022908	0.899588	-0.24239	0.27863	0.170894	0.646463
Q9Y6M4	Casein kinase I isoform gamma-3	CSNK1G3	LPTPVGAVQQDPALSSNREAHQHRDKMQQSK	345	-0.226609	0.804951	0.243197	0.547398	0.0165888	0.969221	-0.265816	0.625416	-0.0392078	0.977009
Q9Y6M5	Zinc transporter 1	SLC30A1	VVIEIKNMPNKQPESSL______________	506	-0.185355	0.447344	0.902153	2.16752e-05	0.716798	0.000155821	0.00596006	0.972763	0.191315	0.340794
Q9Y6N8	Cadherin-10	CDH10	GPRFNKLAEMYGGGESDKDS___________	784	-0.186707	0.398393	1.04748	3.47631e-06	0.86077	2.17745e-05	-0.508743	0.00334151	-0.322037	0.0625602
Q9Y6Q9	Nuclear receptor coactivator 3	NCOA3	SLLSTLSSPGPKLDNSPNMNITQPSKVSNQD	551	0.392016	0.206635	-1.63891	1.68407e-06	-1.24689	1.85897e-05	0.774829	0.00230795	0.382814	0.117871
Q9Y6Q9	Nuclear receptor coactivator 3	NCOA3	ITSCGDGNVVKQEQLSPKKKENNALLRYLLD	728	0.0791086	0.672412	0.752658	8.9698e-06	0.831766	7.2013e-06	0.376279	0.00582888	0.29717	0.0377872
Q9Y6Y8	SEC23-interacting protein	SEC23IP	EKKAVAATSTKGQEQSAQKTKDMASLPSESN	728	1.07091	0.418184	-3.49703	0.000258166	-2.42612	0.00327819	1.01046	0.222091	-0.060453	0.977908
O15042	U2 snRNP-associated SURP motif-containing protein	U2SURP	___________MADKTPGGSQKASSKTRSSD	5	0.797065	0.0971259	-2.61423	1.24693e-06	-1.81716	2.53507e-05	0.897535	0.0100075	0.10047	0.894205
O15530	3-phosphoinositide-dependent protein kinase 1;Putative 3-phosphoinositide-dependent protein kinase 2	PDPK1;PDPK2P	SCPSPSMVRTQTESSTPPGIPGGSRQGPAMD	37	0.250795	0.637169	-2.23495	6.83209e-06	-1.98415	2.42873e-05	0.64448	0.0550551	0.393685	0.358792
O43395	U4/U6 small nuclear ribonucleoprotein Prp3	PRPF3	KKQLSFISPPTPQPKTPSSSQPERLPIGNTI	172	-0.0173013	0.974052	-2.4923	3.16513e-07	-2.5096	7.7559e-07	0.0479248	0.844298	0.0652261	0.914989
O43765	Small glutamine-rich tetratricopeptide repeat-containing protein alpha	SGTA	NPELIEQLRSQIRSRTPSASNDDQQE_____	303	-0.299493	0.64543	-0.640025	0.052485	-0.939518	0.0102027	-0.0988144	0.813771	0.200679	0.806334
O60716	Catenin delta-1	CTNND1	SNMGSNTKSLDNNYSTPNERGDHNRTLDRSG	906	0.855648	0.346933	-3.67456	1.19744e-05	-2.81892	0.000112949	1.00814	0.0840963	0.152495	0.920755
O60825	6-phosphofructo-2-kinase/fructose-2,6-bisphosphatase 2;6-phosphofructo-2-kinase;Fructose-2,6-bisphosphatase	PFKFB2	GASSSEQNNNSYETKTPNLRMSEKKCSWASY	18	0.0562399	0.982591	-0.52159	0.527491	-0.46535	0.584081	0.0660927	0.954651	0.00985276	0.998915
O60885	Bromodomain-containing protein 4	BRD4	QQQQQQQAAAVAAAATPQAQSSQPQSMLDQQ	1309	0.525118	0.569637	-3.97553	7.1392e-06	-3.45041	2.96668e-05	1.17419	0.0513404	0.649074	0.407148
O60927	Protein phosphatase 1 regulatory subunit 11	PPP1R11	HRKGRRRATLGPTPTTPPQPPDPSQPPPGPM	109	0.663086	0.0333031	-2.05211	2.59423e-07	-1.38902	6.60287e-06	0.779816	0.00169621	0.11673	0.734356
O75475	PC4 and SFRS1-interacting protein	PSIP1	EKASNEDVTKAVDITTPKAARRGRKRKAEKQ	141	1.2404	0.00311263	-2.2357	3.47702e-07	-0.995303	0.000153142	1.48188	5.77377e-05	0.241483	0.397495
O75533	Splicing factor 3B subunit 1	SF3B1	SLRWDETPGRAKGSETPGATPGSKIWDPTPS	244	-0.371352	0.308866	-0.0796063	0.655381	-0.450959	0.0258867	-0.40436	0.0855449	-0.0330078	0.959949
O75683	Surfeit locus protein 6	SURF6	AQRRKEKRQRVKGNLTPLTGRNYRQLLERLQ	229	1.08114	0.351862	-2.91665	0.000363088	-1.83551	0.0074236	0.916508	0.207359	-0.164636	0.93704
O76021	Ribosomal L1 domain-containing protein 1	RSL1D1	VKEKSPSLGKKDARQTPKKPEAKFFTTPSKS	454	0.638071	0.651326	-3.44976	0.000362936	-2.81169	0.00165053	0.849686	0.32127	0.211615	0.928842
O76021	Ribosomal L1 domain-containing protein 1	RSL1D1	SASLSSAAATGTSTSTPAAPTARKQLDKEQV	21	-0.484532	0.350685	0.72152	0.0132977	0.236988	0.360087	-0.422158	0.194322	0.0623736	0.954382
O95218	Zinc finger Ran-binding domain-containing protein 2	ZRANB2	SNVNWARRSECNMCNTPKYAKLEERTGYGGG	90	0.522662	0.781606	-2.94624	0.00416809	-2.42357	0.0131583	0.680918	0.536148	0.158256	0.959949
P06400	Retinoblastoma-associated protein	RB1	KTLQTDSIDSFETQRTPRKSNLDEEVNVIPP	356	0.240314	0.15906	0.134329	0.120093	0.374643	0.00110122	0.418157	0.00249025	0.177843	0.191006
P06748	Nucleophosmin	NPM1	AQKSNQNGKDSKPSSTPRSKGQESFKKQEKT	219	-0.1291	0.804951	-1.14863	0.000481222	-1.27773	0.000287598	0.0562574	0.858701	0.185357	0.738106
P06748	Nucleophosmin	NPM1	EEAEEKAPVKKSIRDTPAKNAQKSNQNGKDS	199	-0.299876	0.69868	-0.987361	0.0164461	-1.28724	0.00441761	-0.133446	0.785485	0.16643	0.87967
P08670	Vimentin	VIM	SVSSSSYRRMFGGPGTASRPSSSRSYVTTST	20	0.459396	0.424444	-3.51457	6.11017e-07	-3.05517	2.92134e-06	0.605219	0.0991983	0.145823	0.865045
P09012	U1 small nuclear ribonucleoprotein A	SNRPA	ERDRKREKRKPKSQETPATKKAVQGGGATPV	118	0.448243	0.632415	-3.38612	2.15418e-05	-2.93787	8.53831e-05	0.342517	0.560495	-0.105726	0.955413
P10412	Histone H1.4	HIST1H1E	ETAPAAPAAPAPAEKTPVKKKARKSAGAAKR	18	0.677563	0.0791018	-0.658637	0.0038232	0.0189256	0.921526	0.52702	0.0366846	-0.150543	0.729492
P13639	Elongation factor 2	EEF2	KAGIIASARAGETRFTDTRKDEQERCITIKS	57	-0.0173695	0.979036	2.54743	1.54492e-06	2.53006	2.97526e-06	-0.28583	0.341836	-0.268461	0.548753
P15880	40S ribosomal protein S2	RPS2	TRVSVQRTQAPAVATT_______________	293	0.41399	0.70393	-1.78682	0.00419429	-1.37283	0.0183348	0.00446307	0.995086	-0.409527	0.734304
[truncated: 165 more rows]

## Sheet: Legend
Dataset EV3
Results of linear modeling of 5 different comparisons. Table shows log2 fold change and adjusted p value for each comparison. For the concatenated comparison of (BI2536.attached-BI2536.suspended)-(DMSO.attached-DMSO.suspended), the term “difference” is used.
